# Supplementary material for: Amphipathic 1,3-oxazolidines from N-alkyl glucamines and benzaldehydes: stereochemical and mechanistic studies
Source: Royal Society of Chemistry journal article supplement (doi:10.1039/d0nj05503d), 2021-01-01
Supplement: d0nj05503d1.pdf [file d0nj05503d1.pdf]

## Electronic Supplementary Information (ESI)

### Amphipathic 1,3-oxazolidines from *N*-alkyl glucamines and benzaldehydes: Stereochemical and mechanistic studies.

Esther Matamoros,\* Pedro Cintas and Juan C. Palacios\*

Departamento de Química Orgánica e Inorgánica, Facultad de Ciencias, and IACYS-Unidad de Química Verde y Desarrollo Sostenible, Universidad de Extremadura, E-06006 Badajoz, Spain

E-mail: esthermc@unex.es; palacios@unex.es

#### ORCID

Esther Matamoros: 0000-0003-4460-2065

Pedro Cintas: 0000-0002-2608-3604

Juan Carlos Palacios: 0000-0002-5004-4744

#### Summary

| Pages | Supporting Data                                                                                                           |
|-------|---------------------------------------------------------------------------------------------------------------------------|
| 2     | Tables S1-S9                                                                                                              |
| 9     | Figures S1-S27                                                                                                            |
| 19    | IR Spectra. (Fig. S28-S50)                                                                                                |
| 27    | NMR Spectra (Fig. S51-S140)                                                                                               |
| 72    | Cartesian Coordinates and Calculated Energies at the M06-2X/6-311G(d,p) Level in Gas Phase, Benzene and DMSO (SMD Model). |

**Table S1** <sup>1</sup>H NMR chemical shifts (δ, ppm) of the heterocyclic atoms of various oxazolidines<sup>a</sup>

| Compound         | H-2  | H-5  | H-4a | H-4b | $\Delta\delta_{H-4}^b$ | Configuratio<br>n |
|------------------|------|------|------|------|------------------------|-------------------|
| 21a              | 4.90 | 4.28 | 3.41 | 2.34 | 1.07                   | R                 |
| 21b              | 5.17 | 4.20 | 2.88 | 2.81 | 0.07                   | S                 |
| 22a              | 5.18 | 4.28 | 3.42 | 2.31 | 1.11                   | R                 |
| 22b              | 5.28 | 4.19 | 3.09 | 2.73 | 0.36                   | S                 |
| 23a              | 4.90 | 4.22 | 3.42 | 2.27 | 1.15                   | R                 |
| 23b              | 5.06 | 4.17 | 3.08 | 2.68 | 0.40                   | S                 |
| 24a              | 4.74 | 4.22 | 3.40 | 2.27 | 1.13                   | R                 |
| 24b              | 4.98 | 4.18 | 2.97 | 2.71 | 0.26                   | S                 |
| 25a              | 4.66 | 4.24 | 3.40 | 2.24 | 1.16                   | R                 |
| 26a              | 4.63 | 4.24 | 3.40 | 2.23 | 1.17                   | R                 |
| 27a <sup>c</sup> | 4.68 | 4.25 | 3.40 | 2.25 | 1.15                   | R                 |
| 28a              | 4.64 | 4.23 | 3.39 | 2.24 | 1.15                   | R                 |
| 29a              | 4.64 | 4.23 | 3.40 | 2.24 | 1.16                   | R                 |
| 30a              | 4.63 | 4.25 | 3.39 | 2.25 | 1.14                   | R                 |
| 31a              | 4.61 | 4.25 | 3.41 | 2.23 | 1.18                   | R                 |
| 32b              | 4.99 | 4.16 | 3.10 | 2.64 | 0.46                   | S                 |
| 34b              | 5.13 | 4.19 | 2.89 | 2.78 | 0.11                   | S                 |
| 35a              | 4.90 | 4.34 | 3.41 | 2.32 | 1.09                   | R                 |
| 35b              | 5.12 | 4.20 | 2.95 | 2.77 | 0.18                   | S                 |
| 36a              | 4.73 | 4.25 | 3.39 | 2.26 | 1.13                   | R                 |
| 36b              | 4.93 | 4.17 | 2.98 | 2.68 | 0.30                   | S                 |
| 37a              | 4.63 | 4.22 | 3.40 | 2.23 | 1.17                   | R                 |
| 37b              | 4.76 | 4.17 | 3.12 | 2.60 | 0.52                   | S                 |
| 38a              | 4.67 | 4.25 | 3.40 | 2.25 | 1.15                   | R                 |
| 38b              | 4.83 | 4.18 | 3.09 | 2.63 | 0.46                   | S                 |
| 39a              | 4.65 | 4.23 | 3.38 | 2.24 | 1.14                   | R                 |
| 40a              | 4.62 | 4.19 | 3.39 | 2.23 | 1.16                   | R                 |
| 41a              | 4.60 | 4.23 | 3.39 | 2.21 | 1.18                   | R                 |

<sup>a</sup>At 500 MHz in DMSO-*d*<sub>6</sub>; <sup>b</sup> $\Delta\delta_{H-4} = \delta_{H-4a} - \delta_{H-4b}$ ; <sup>c</sup>recorded at 400 MHz.

**Table S2.**  $^{13}\text{C}$  NMR Chemical shifts ( $\delta$ , ppm) of several oxazolidines.<sup>a</sup>

| Product          | C-2  | C-4  | C-5  | N-CH <sub>2</sub> | C-1 <sup>c</sup> | C-2 <sup>c</sup> | C-3 <sup>c</sup> | C-4' |
|------------------|------|------|------|-------------------|------------------|------------------|------------------|------|
| 21a              | 94.7 | 53.6 | 79.5 | 45.3              | 71.1             | 71.1             | 71.0             | 63.3 |
| 21b              | 95.2 | 52.5 | 79.5 | 46.6              | 71.3             | 71.1             | 70.9             | 63.4 |
| 22a              | 91.8 | 53.6 | 79.2 | 45.0              | 71.1             | 71.0             | 71.0             | 63.3 |
| 22b              | 92.9 | 52.0 | 78.0 | 46.0              | 71.1             | 70.9             | 70.9             | 63.4 |
| 23a              | 94.1 | 53.6 | 78.2 | 44.9              | 71.0             | 70.9             | 70.9             | 63.2 |
| 23b              | 94.6 | 52.3 | 77.6 | 45.1              | 71.2             | 71.1             | 71.0             | 63.7 |
| 24a              | 94.6 | 53.1 | 78.6 | 44.7              | 70.6             | 70.5             | 70.8             | 62.8 |
| 24b              | 95.1 | 51.9 | 77.2 | 45.6              | 70.7             | 70.3             | 70.3             | 62.9 |
| 25a              | 96.0 | 53.7 | 78.9 | 45.1              | 71.1             | 71.0             | 71.0             | 63.3 |
| 26a              | 96.1 | 53.7 | 78.8 | 44.9              | 71.1             | 71.0             | 71.0             | 63.3 |
| 27a <sup>b</sup> | 96.2 | 53.7 | 78.9 | 45.0              | 71.1             | 71.0             | 71.0             | 63.3 |
| 28a              | 96.6 | 54.2 | 79.3 | 45.5              | 71.7             | 71.6             | 71.6             | 63.9 |
| 29a              | 96.0 | 53.7 | 78.7 | 45.0              | 71.1             | 71.0             | 71.0             | 63.3 |
| 30a              | 96.8 | 54.2 | 79.4 | 45.5              | 71.7             | 71.6             | 71.6             | 63.9 |
| 31a              | 96.5 | 54.2 | 79.1 | 45.4              | 71.7             | 71.6             | 71.6             | 63.9 |
| 32b              | 94.2 | 52.0 | 77.2 | 45.6              | 70.8             | 70.7             | 70.7             | 63.3 |
| 34b              | 96.1 | 53.4 | 78.6 | 52.8              | 71.9             | 71.6             | 71.4             | 63.9 |
| 35a              | 95.3 | 54.5 | 80.1 | 51.3              | 71.7             | 71.6             | 71.5             | 63.9 |
| 35b              | 95.9 | 53.4 | 78.6 | 52.5              | 71.9             | 71.6             | 71.4             | 64.0 |
| 36a              | 95.5 | 54.2 | 79.3 | 50.9              | 71.2             | 71.1             | 71.0             | 63.5 |
| 36b              | 96.4 | 53.3 | 78.2 | 52.2              | 71.7             | 71.6             | 71.4             | 64.0 |
| 37a              | 96.2 | 54.1 | 78.8 | 50.7              | 71.1             | 71.0             | 71.0             | 63.3 |
| 37b              | 96.5 | 54.5 | 77.1 | 50.7              | 71.1             | 70.3             | 70.3             | 63.2 |
| 38a              | 96.9 | 54.6 | 79.5 | 51.3              | 71.7             | 71.6             | 71.6             | 63.9 |
| 38b              | 97.5 | 53.4 | 78.1 | 51.9              | 71.6             | 71.4             | 71.4             | 64.1 |
| 39a              | 96.7 | 54.6 | 79.5 | 51.3              | 71.7             | 71.6             | 71.6             | 63.9 |
| 40a              | 96.9 | 56.6 | 79.5 | 51.2              | 71.7             | 71.5             | 71.5             | 63.9 |
| 41a              | 96.8 | 54.6 | 79.4 | 51.1              | 71.7             | 71.5             | 71.5             | 63.9 |

<sup>a</sup> At 125 MHz in DMSO-*d*<sub>6</sub>; <sup>b</sup> at 100 MHz; <sup>c</sup> the chemical shifts of these carbons can be interchanged.

**Table S3.**  $^{13}\text{C}$  NMR chemical shifts ( $\delta$ , ppm) of 43-45.

| C-2 | C-4 | C-5 | C-1 <sup>c</sup> /C-6 <sup>d</sup> | C-4 <sup>c</sup> /C-3 <sup>d</sup> | N-CH <sub>3</sub> |
|-----|-----|-----|------------------------------------|------------------------------------|-------------------|
|-----|-----|-----|------------------------------------|------------------------------------|-------------------|

**Table S3**  $^1\text{H}$  NMR chemical shifts ( $\delta$ , ppm) at the heterocyclic moiety of 43-45

|    | H-2            | H-4 <sup>a</sup> | H-4b | $\Delta\delta_{\text{H-4}}^{\text{c}}$ | H-5  | H-1 <sup>d</sup> /H-6 <sup>e</sup> | N-CH <sub>3</sub> |      |
|----|----------------|------------------|------|----------------------------------------|------|------------------------------------|-------------------|------|
| 43 | a <sup>a</sup> | 4.75             | 3.29 | 2.74                                   | 0.55 | 4.51                               | 3.55              | 2.14 |
|    | b <sup>a</sup> | 4.90             | 3.18 | 2.74                                   | 0.44 | 4.35                               | 3.55              | 2.24 |
|    | c <sup>b</sup> | 4.73             | 3.11 | 2.63                                   | 0.48 | 3.78                               | 3.60              | 1.92 |
| 44 | a <sup>a</sup> | 4.58             | 3.25 | 2.66                                   | 0.59 | 4.46                               | 3.50              | 2.09 |
|    | b <sup>a</sup> | 4.61             | 3.26 | 2.70                                   | 0.56 | 4.33                               | 3.50              | 2.14 |
|    | c <sup>a</sup> | 4.49             | 3.08 | 2.63                                   | 0.45 | 3.76                               | 3.55              | 1.88 |
| 45 | a <sup>b</sup> | 4.52             | 3.24 | 2.66                                   | 0.58 | 4.43                               | 3.50              | 2.07 |
|    | b <sup>a</sup> | 4.53             | 3.27 | 2.69                                   | 0.58 | 4.31                               | 3.50              | 2.10 |
|    | c <sup>a</sup> | 4.39             | 3.07 | 2.57                                   | 0.50 | 3.75                               | 3.53              | 1.86 |

<sup>a</sup>At 500 MHz in DMSO-*d*<sub>6</sub>; <sup>b</sup>recorded at 400 MHz in DMSO-*d*<sub>6</sub>; <sup>c</sup> $\Delta\delta_{\text{H-4}} = \delta_{\text{H-4a}} - \delta_{\text{H-4b}}$ ; <sup>d</sup>oxazolidine; <sup>e</sup>oxazine.

**Table S4.**  $^{13}\text{C}$  NMR chemical shifts ( $\delta$ , ppm) of **43-45**.

|           |                      | C-2  | C-4  | C-5  | C-1 <sup>c</sup> /C-6 <sup>d</sup> | C-4 <sup>c</sup> /C-3 <sup>d</sup> | N-CH <sub>3</sub> |
|-----------|----------------------|------|------|------|------------------------------------|------------------------------------|-------------------|
| <b>43</b> | <b>a<sup>a</sup></b> | 96.7 | 56.7 | 77.5 | 70.4                               | 63.4                               | 37.8              |
|           | <b>b<sup>a</sup></b> | 96.7 | 56.1 | 77.3 | 71.6                               | 63.4                               | 38.3              |
|           | <b>c<sup>b</sup></b> | 94.4 | 60.7 | 63.1 | 78.9                               | 63.2                               | 39.5              |
| <b>44</b> | <b>a<sup>a</sup></b> | 98.2 | 56.8 | 76.8 | 70.6                               | 63.4                               | 37.7              |
|           | <b>b<sup>a</sup></b> | 98.0 | 56.7 | 76.6 | 72.1                               | 63.6                               | 38.3              |
|           | <b>c<sup>a</sup></b> | 96.2 | 61.0 | 63.2 | 78.9                               | 63.3                               | 40.0              |
| <b>45</b> | <b>a<sup>b</sup></b> | 98.0 | 56.7 | 76.5 | 70.6                               | 63.4                               | 37.6              |
|           | <b>b<sup>a</sup></b> | 97.2 | 54.3 | 75.7 | 71.7                               | 63.0                               | 37.4              |
|           | <b>c<sup>a</sup></b> | 95.5 | 60.5 | 62.6 | 78.2                               | 63.8                               | 37.0              |

<sup>a</sup> At 125MHz in DMSO- $d_6$ ; <sup>b</sup> 100MHz in DMSO- $d_6$ ; <sup>c</sup> oxazolidine; <sup>d</sup> oxazine.

**Table S5.** Chemical shift ( $\delta$ , ppm) of heterocyclic protons, optical rotations ( $^\circ$ ) and configuration at C-2 of oxazolidines**2S-12S.**<sup>a,b</sup>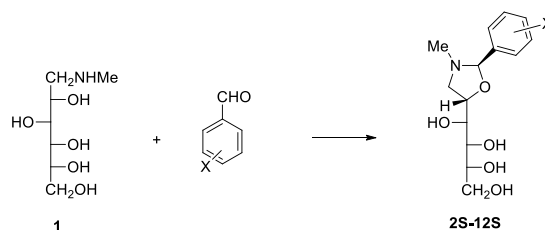

| Comp.      | X                     | H-4a | H-4b | $\Delta\delta_{\text{H-4}}^c$ | Configuration <sup>d</sup> | $[\alpha]_D^{25}$ <sup>e</sup> |
|------------|-----------------------|------|------|-------------------------------|----------------------------|--------------------------------|
| <b>2S</b>  | 4-NO <sub>2</sub>     | 3.35 | 2.42 | 0.93                          | <i>R</i>                   | +11.0                          |
| <b>3S</b>  | 3-MeO                 | 3.32 | 2.34 | 0.98                          | <i>R</i>                   | +12.0                          |
| <b>4S</b>  | 3-Br                  | 3.31 | 2.35 | 0.96                          | <i>R</i>                   | +7.0                           |
| <b>5S</b>  | 4-Cl                  | 3.32 | 2.35 | 0.97                          | <i>R</i>                   | +6.0                           |
| <b>6S</b>  | H                     | 3.33 | 2.37 | 0.96                          | <i>R</i>                   | +12.0                          |
| <b>7S</b>  | 2-Me                  | 3.31 | 2.41 | 1.00                          | <i>R</i>                   | +22.0                          |
| <b>8S</b>  | 3-Me                  | 3.32 | 2.34 | 0.98                          | <i>R</i>                   | +14.0                          |
| <b>9S</b>  | 4-Me                  | 3.34 | 2.34 | 1.00                          | <i>R</i>                   | +11.0                          |
| <b>10S</b> | 4-Et                  | 3.32 | 2.34 | 0.98                          | <i>R</i>                   | +8.0                           |
| <b>11S</b> | 4-MeO                 | 3.30 | 2.31 | 0.99                          | <i>R</i>                   | +11.0                          |
| <b>12S</b> | 2,4-(Me) <sub>2</sub> | 3.33 | 2.37 | 0.96                          | <i>R</i>                   | +14.0                          |

<sup>a</sup> At 400 MHz, in DMSO- $d_6$ ; <sup>b</sup> Reference 6; <sup>c</sup>  $\Delta\delta_{\text{H-4}} = \delta_{\text{H-4a}} - \delta_{\text{H-4b}}$ ; <sup>d</sup> At C-2; <sup>e</sup> In C<sub>5</sub>D<sub>5</sub>N.

**Table S6.** Geometry (Å and °) and energy (kcal mol<sup>-1</sup>) data for intramolecular hydrogen bonds in compounds **21**, **27** and **31**.<sup>a</sup>

|            | Et | Arom | H Bond | D-H...A   | Gas phase |          |          |        | Benzene |          |          |        | DMSO   |          |          |        |
|------------|----|------|--------|-----------|-----------|----------|----------|--------|---------|----------|----------|--------|--------|----------|----------|--------|
|            |    |      |        |           | d(D-H)    | d(H...A) | d(D...A) | ∠(DHA) | d(D-H)  | d(H...A) | d(D...A) | ∠(DHA) | d(D-H) | d(H...A) | d(D...A) | ∠(DHA) |
| <b>21a</b> | ec | ax   | O      | O6-H...O1 | 0.963     | 2.029    | 2.600    | 116.04 | 0.964   | 2.030    | 2.599    | 115.83 | 0.9647 | 2.0251   | 2.5948   | 115.82 |
|            | ec | ax   | N      | O6-H...N2 | 0.970     | 2.065    | 2.863    | 138.39 | 0.971   | 2.022    | 2.843    | 141.05 | 0.9742 | 1.9590   | 2.8063   | 144.01 |
|            | ax | ax   | O      | O6-H...O1 | 0.963     | 2.046    | 2.591    | 113.97 | 0.964   | 2.037    | 2.594    | 114.83 | 0.9647 | 2.0426   | 2.5942   | 114.38 |
|            | ec | ec   | O      | O6-H...O1 | 0.963     | 2.054    | 2.606    | 114.59 | 0.964   | 2.057    | 2.605    | 114.20 | 0.9642 | 2.0769   | 2.6144   | 113.42 |
| <b>21b</b> | ec | ec   | O      | O6-H...O1 | 0.965     | 1.965    | 2.591    | 120.41 | 0.965   | 1.965    | 2.589    | 120.21 | 0.9654 | 1.9846   | 2.5912   | 118.76 |
|            | ec | ec   | N      | O6-H...N2 | 0.971     | 1.976    | 2.831    | 145.71 | 0.973   | 1.960    | 2.822    | 146.32 | 0.9748 | 1.9322   | 2.8013   | 147.11 |
|            | ax | ec   | O      | O6-H...O1 | 0.963     | 2.013    | 2.599    | 117.23 | 0.963   | 2.017    | 2.598    | 116.83 | 0.9643 | 2.0552   | 2.6031   | 114.16 |
| <b>21c</b> | ec | ec   | O      | O7-H...O1 | 0.963     | 2.069    | 2.608    | 113.62 | 0.963   | 2.067    | 2.612    | 114.06 | 0.9642 | 2.0517   | 2.6136   | 115.32 |
|            | ax | ec   | O      | O7-H...O1 | 0.963     | 2.065    | 2.627    | 115.46 | 0.963   | 2.056    | 2.622    | 115.73 | 0.9642 | 2.0609   | 2.6265   | 115.67 |
| <b>21d</b> | ec | ax   | O      | O7-H...O1 | 0.962     | 2.064    | 2.576    | 111.39 | 0.963   | 2.052    | 2.578    | 112.44 | 0.9642 | 2.0332   | 2.5841   | 114.31 |
|            | ax | ax   | O      | O7-H...O1 | 0.963     | 2.068    | 2.591    | 112.27 | 0.964   | 2.057    | 2.590    | 112.97 | 0.9645 | 2.0588   | 2.5997   | 113.60 |
| <b>27a</b> | ec | ax   | O      | O6-H...O1 | 0.964     | 2.011    | 2.596    | 117.06 | 0.964   | 2.008    | 2.593    | 117.08 | 0.9648 | 2.0204   | 2.5929   | 116.02 |
|            | ec | ax   | N      | O6-H...N2 | 0.971     | 2.036    | 2.842    | 139.18 | 0.973   | 2.002    | 2.825    | 141.03 | 0.9761 | 1.9074   | 2.7819   | 147.73 |
|            | ax | ax   | O      | O6-H...O1 | 0.964     | 2.025    | 2.589    | 115.37 | 0.964   | 2.025    | 2.586    | 115.13 | 0.9645 | 2.0423   | 2.5900   | 114.07 |
|            | ec | ec   | O      | O6-H...O1 | 0.964     | 2.034    | 2.603    | 115.84 | 0.964   | 2.034    | 2.603    | 115.81 | 0.9645 | 2.0559   | 2.6113   | 114.77 |
| <b>27b</b> | ec | ec   | O      | O6-H...O1 | 0.966     | 1.963    | 2.585    | 120.03 | 0.966   | 1.971    | 2.587    | 119.53 | 0.9659 | 1.9819   | 2.5891   | 118.76 |
|            | ec | ec   | N      | O6-H...N2 | 0.972     | 1.969    | 2.821    | 145.04 | 0.974   | 1.952    | 2.810    | 145.61 | 0.9754 | 1.9248   | 2.7923   | 146.76 |
|            | ax | ec   | O      | O6-H...O1 | 0.964     | 1.986    | 2.587    | 118.42 | 0.964   | 1.991    | 2.586    | 117.90 | 0.9648 | 2.0225   | 2.5912   | 115.71 |
| <b>27c</b> | ec | ec   | O      | O7-H...O1 | 0.963     | 2.044    | 2.599    | 114.76 | 0.964   | 2.037    | 2.597    | 115.12 | 0.9642 | 2.0492   | 2.6138   | 115.53 |
|            | ax | ec   | O      | O7-H...O1 | 0.963     | 2.045    | 2.617    | 116.21 | 0.964   | 2.046    | 2.619    | 116.25 | 0.9645 | 2.0437   | 2.6181   | 116.31 |
| <b>27d</b> | ec | ax   | O      | O7-H...O1 | 0.963     | 2.039    | 2.579    | 113.49 | 0.964   | 2.038    | 2.585    | 114.04 | 0.9643 | 2.0315   | 2.5912   | 115.02 |
|            | ax | ax   | O      | O7-H...O1 | 0.963     | 2.037    | 2.588    | 114.36 | 0.964   | 2.043    | 2.595    | 114.49 | 0.9646 | 2.0435   | 2.5992   | 114.73 |
| <b>31a</b> | ec | ax   | O      | O6-H...O1 | 0.964     | 2.001    | 2.591    | 117.52 | 0.964   | 1.997    | 2.589    | 117.64 | 0.9649 | 2.0156   | 2.5916   | 116.29 |
|            | ec | ax   | N      | O6-H...N2 | 0.972     | 2.001    | 2.822    | 140.78 | 0.974   | 1.962    | 2.800    | 142.76 | 0.9755 | 1.9343   | 2.7876   | 144.63 |
|            | ax | ax   | O      | O6-H...O1 | 0.964     | 2.017    | 2.587    | 115.88 | 0.964   | 2.019    | 2.586    | 115.60 | 0.9647 | 2.0474   | 2.5945   | 114.03 |
|            | ec | ec   | O      | O6-H...O1 | 0.964     | 2.028    | 2.600    | 116.09 | 0.964   | 2.026    | 2.601    | 116.25 | 0.9646 | 2.0530   | 2.6099   | 114.88 |
| <b>31b</b> | ec | ec   | O      | O6-H...O1 | 0.966     | 1.969    | 2.586    | 119.59 | 0.966   | 1.969    | 2.586    | 119.64 | 0.9658 | 1.9795   | 2.5881   | 118.88 |
|            | ec | ec   | N      | O6-H...N2 | 0.972     | 1.973    | 2.824    | 144.95 | 0.973   | 1.957    | 2.815    | 145.64 | 0.9759 | 1.9267   | 2.7957   | 146.95 |
|            | ax | ec   | O      | O6-H...O1 | 0.964     | 1.988    | 2.588    | 118.34 | 0.964   | 1.987    | 2.586    | 118.12 | 0.9648 | 2.0266   | 2.5932   | 115.55 |
| <b>31c</b> | ec | ec   | O      | O7-H...O1 | 0.963     | 2.044    | 2.600    | 114.82 | 0.964   | 2.040    | 2.601    | 115.18 | 0.9643 | 2.0271   | 2.6017   | 116.27 |
|            | ax | ec   | O      | O7-H...O1 | 0.963     | 2.040    | 2.615    | 116.41 | 0.964   | 2.045    | 2.618    | 116.22 | 0.9645 | 2.0439   | 2.6185   | 116.33 |
| <b>31d</b> | ec | ax   | O      | O7-H...O1 | 0.966     | 2.042    | 2.581    | 113.46 | 0.963   | 2.030    | 2.584    | 114.64 | 0.9644 | 2.0435   | 2.6040   | 115.16 |
|            | ax | ax   | O      | O7-H...O1 | 0.963     | 2.039    | 2.590    | 114.40 | 0.964   | 2.031    | 2.589    | 114.88 | 0.9647 | 2.0314   | 2.5934   | 115.20 |

<sup>a</sup>At the M06-2X/6-311G(d,p) level.

**Table S7.** NBO data of **27**.<sup>a,b</sup>

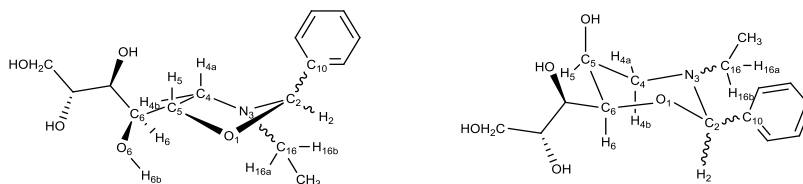

| Donor    | Acceptor          | <b>27a</b> |           |       |       | <b>27b</b> |           |       | <b>27c</b> |       | <b>27d</b> |       |
|----------|-------------------|------------|-----------|-------|-------|------------|-----------|-------|------------|-------|------------|-------|
|          |                   | ec-ax (N)  | ec-ax (O) | ax-ax | ec-ec | ec (O)     | ec-ec (N) | ax-ec | ec-ec      | ax-ec | ec-ax      | ax-ax |
| LP(1) N3 | BD*(1) O1 - C2    | 1.18       | 1.13      | 11.31 | 1.4   | 0.91       | 1.14      | 12.24 | 3.61       | 18.15 | 7.42       | 16.84 |
| LP(1) N3 | BD*(1) C2 - C10   | 7.81       | 8.64      | 2.41  | 1.94  | 2.1        | 1.53      | --    | 0.68       | 0.65  | 10.9       | 3.04  |
| LP(1) N3 | BD*(1) C2 - H2    | 3.87       | 4.45      | --    | 9.45  | 8.97       | 7.71      | 3.44  | 8.88       | 2.61  | 1.61       | --    |
| LP(1) N3 | BD*(1) C4 - H4a   | 2.81       | 3.02      | --    | 8.39  | 2.77       | 2.65      | --    | --         | 0.89  | 0.82       | 0.76  |
| LP(1) N3 | BD*(1) C4 - H4b   | 8.07       | 9.18      | 4.26  | 3.69  | 8.78       | 7.63      | 4.21  | 8.71       | 3.4   | 9.9        | 3.71  |
| LP(1) N3 | BD*(1) C4 - C5    | --         | --        | 6.2   | --    | --         | --        | 6.65  | 0.99       | 8.47  | 2.78       | 8.24  |
| LP(1) N3 | BD*(1) O6 - H6b   | 6.4        | --        | --    | --    | --         | 9.04      | --    | --         | --    | --         | --    |
| LP(1) N3 | BD*(1) C16 - H16a | 8.34       | 9.17      | 7.71  | 8.89  | 8.7        | 7.9       | 6.84  | 8.31       | 5.19  | 6.58       | 7.12  |
| LP(1) N3 | BD*(1) O5 - H5a   | --         | --        | --    | --    | --         | --        | --    | 0.98       | --    | 1.21       | --    |
| LP(1) O1 | BD*(2) C2 - N3    | 3.35       | 3.33      | 2.73  | 1.43  | 3.07       | 2.79      | 2.51  | 0.78       | 0.76  | 0.76       | 1.23  |
| LP(1) O1 | BD*(1) C4 - C5    | 3.35       | 3.09      | 3.21  | 2.92  | 2.98       | 3.44      | 3.16  | --         | --    | --         | --    |
| LP(2) O1 | BD*(1) C2 - C10   | 7.62       | 7.17      | 7.84  | 1.25  | 3.18       | 2.77      | 0.98  | --         | 0.88  | 5.67       | 5.82  |
| LP(2) O1 | BD*(2) C2 - N3    | 0.78       | --        | 3.18  | 4.25  | 0.84       | 2.12      | 3.79  | 10.23      | 9.91  | 8.77       | 8.66  |
| LP(2) O1 | BD*(1) C2 - H2    | 5.24       | 5.45      | 2.01  | 9.45  | 8.8        | 10.14     | 8.81  | 6.57       | 5.33  | 3.74       | 3.31  |
| LP(2) O1 | BD*(1) C5 - H5    | 4.72       | 4.32      | 7.56  | 3.88  | 4.24       | 5.39      | 7.44  | 0.6        | 0.65  | 0.54       | 0.66  |
| LP(2) O1 | BD*(1) C5 - C6    | 6.41       | 5.78      | 3.47  | 5.75  | 6.29       | 6.14      | 3.8   | 5.88       | 5.97  | 6.25       | 5.94  |
| LP(2) O1 | BD*(1) C6 - H6    | 0.62       | --        | --    | --    | --         | 0.66      | --    | 6.51       | 6.14  | 6.02       | 5.99  |
| LP(1) O1 | BD*(1) O6 - H6b   | --         | 1.04      | 1.61  | 1.05  | 1.66       | --        | 2.15  | 1.35       | 1.21  | 1.39       | 1.43  |
| LP(2) O1 | BD*(1) O6 - H6b   | --         | 2.16      | 0.73  | 1.73  | 2.67       | --        | 0.76  | 0.65       | 1.04  | 0.62       | 0.72  |
| LP(2) O2 | BD*(1) O5 - H5b   | --         | --        | --    | --    | --         | --        | --    | --         | 0.56  | --         | 0.71  |

<sup>a</sup>At the M06-2X/6-311G(d,p) level in gas phase. <sup>b</sup>In kcal mol<sup>-1</sup>

**Table S8.** Relative electronic and Gibbs energies for isomers and conformers of **34**, **38** and **39**<sup>a</sup>

|            | Octyl <sup>b</sup> | Aryl <sup>c</sup> | Gas phase  |            | Benzene    |            | DMSO       |            |
|------------|--------------------|-------------------|------------|------------|------------|------------|------------|------------|
|            |                    |                   | $\Delta E$ | $\Delta G$ | $\Delta E$ | $\Delta G$ | $\Delta E$ | $\Delta G$ |
| <b>34a</b> | eq                 | ax                | 2.78       | 2.98       | 2.82       | 2.77       | 2.60       | 2.45       |
| <b>34b</b> | eq                 | eq                | 0.00       | 0.00       | 0.00       | 0.00       | 0.00       | 0.00       |
| <b>34c</b> | eq                 | eq                | 1.96       | 0.64       | 1.70       | 0.72       | 1.21       | 2.63       |
| <b>34d</b> | ax                 | ax                | 0.77       | 1.95       | 1.07       | 2.10       | 1.25       | 2.73       |
| <b>38a</b> | eq                 | ax                | 2.70       | 3.57       | 2.80       | 2.70       | 2.93       | 0.99       |
| <b>38b</b> | eq                 | eq                | 0.00       | 0.00       | 0.00       | 0.00       | 0.00       | 0.00       |
| <b>38c</b> | eq                 | eq                | 1.72       | 0.93       | 1.54       | 0.81       | 1.52       | 0.60       |
| <b>38d</b> | ax                 | ax                | 1.06       | 1.98       | 1.33       | 1.66       | 1.63       | 2.09       |
| <b>39a</b> | eq                 | ax                | 2.31       | 1.84       | 2.38       | 1.36       | 2.48       | 0.50       |
| <b>39b</b> | eq                 | eq                | 0.00       | 0.00       | 0.00       | 0.00       | 0.00       | 0.00       |
| <b>39c</b> | eq                 | eq                | 1.35       | 2.28       | 1.58       | 0.95       | 1.26       | 0.85       |
| <b>39d</b> | ax                 | ax                | 0.70       | 3.19       | 1.02       | 1.57       | 1.38       | 1.88       |

<sup>a</sup>In kcal mol<sup>-1</sup>; <sup>b</sup>arrangement of the octyl group with respect to the ring; <sup>c</sup>arrangement of the aromatic ring with respect to either oxazolidine or oxazine rings.

**Table S9.** Relative electronic and Gibbs energies for isomers/conformers of compounds **43-45**<sup>a</sup>

|            |                     |                   | Gas phase           |            | Benzene    |            | DMSO       |            |            |
|------------|---------------------|-------------------|---------------------|------------|------------|------------|------------|------------|------------|
|            | Methyl <sup>b</sup> | Aryl <sup>c</sup> | H-bond <sup>d</sup> | $\Delta E$ | $\Delta G$ | $\Delta E$ | $\Delta G$ | $\Delta E$ | $\Delta G$ |
| <b>43a</b> | eq                  | ax                | O                   | 3.66       | 2.57       | 4.18       | 3.17       | 4.21       | 4.01       |
|            | eq                  | ax                | N                   | 2.53       | 2.28       | 2.32       | 2.04       | 1.98       | 2.02       |
|            | eq                  | eq                | O                   | 2.33       | 0.49       | 2.62       | 1.29       | 3.03       | 2.18       |
|            | ax                  | ax                | O                   | 1.79       | 1.40       | 2.44       | 1.91       | 3.27       | 3.01       |
| <b>43b</b> | eq                  | eq                | O                   | 1.70       | 0.32       | 2.17       | 1.16       | 2.37       | 1.90       |
|            | eq                  | eq                | N                   | 0.00       | 0.00       | 0.00       | 0.00       | 0.00       | 0.00       |
|            | ax                  | eq                | O                   | 3.84       | 2.97       | 4.48       | 3.27       | 4.81       | 4.76       |
| <b>43c</b> | eq                  | eq                | O                   | 2.65       | 1.59       | 1.66       | 1.47       | -0.42      | 0.10       |
|            | ax                  | eq                | O                   | 3.44       | 2.87       | 3.31       | 2.49       | 2.71       | 2.96       |
| <b>43d</b> | eq                  | ax                | O                   | 6.63       | 5.23       | 5.81       | 4.85       | 4.07       | 2.84       |
|            | ax                  | ax                | O                   | 3.72       | 3.79       | 3.71       | 3.70       | 3.19       | 3.88       |
| <b>44a</b> | eq                  | ax                | O                   | 3.84       | 3.31       | 4.40       | 3.84       | 4.53       | 3.78       |
|            | eq                  | ax                | N                   | 2.30       | 1.95       | 2.21       | 2.17       | 2.07       | 2.00       |
|            | eq                  | eq                | O                   | 2.61       | 1.06       | 2.84       | 1.65       | 3.09       | 1.83       |
|            | ax                  | ax                | O                   | 2.47       | 1.23       | 3.10       | 1.63       | 3.63       | 2.94       |
| <b>44b</b> | eq                  | eq                | O                   | 1.59       | 0.81       | 2.08       | 1.48       | 2.34       | 1.48       |
|            | eq                  | eq                | N                   | 0.00       | 0.00       | 0.00       | 0.00       | 0.00       | 0.00       |
|            | ax                  | eq                | O                   | 4.01       | 3.31       | 4.63       | 3.76       | 4.85       | 4.15       |
| <b>44c</b> | eq                  | eq                | O                   | 2.28       | 1.51       | 1.54       | 0.78       | -0.40      | -0.63      |
|            | ax                  | eq                | O                   | 4.27       | 4.10       | 3.94       | 4.23       | 3.08       | 3.06       |
| <b>44d</b> | eq                  | ax                | O                   | 5.96       | 4.81       | 5.29       | 5.64       | 4.11       | 3.78       |
|            | ax                  | ax                | O                   | 4.34       | 4.34       | 4.21       | 3.72       | 3.61       | 3.16       |
| <b>45a</b> | eq                  | ax                | O                   | 4.12       | 3.82       | 4.68       | 4.13       | 4.81       | 4.58       |
|            | eq                  | ax                | N                   | 2.57       | 2.52       | 2.50       | 2.57       | 2.37       | 2.62       |
|            | eq                  | eq                | O                   | 2.62       | 1.28       | 2.90       | 1.85       | 3.15       | 1.80       |
|            | ax                  | ax                | O                   | 2.64       | 2.20       | 3.28       | 2.28       | 3.97       | 4.09       |
| <b>45b</b> | eq                  | eq                | O                   | 1.57       | 1.01       | 2.08       | 1.25       | 2.35       | 1.94       |
|            | eq                  | eq                | N                   | 0.00       | 0.00       | 0.00       | 0.00       | 0.00       | 0.00       |
|            | ax                  | eq                | O                   | 4.39       | 3.76       | 4.98       | 4.90       | 5.23       | 4.82       |
| <b>45c</b> | eq                  | eq                | O                   | 2.35       | 2.42       | 1.63       | 1.53       | -0.23      | -0.84      |
|            | ax                  | eq                | O                   | 4.71       | 4.88       | 4.46       | 4.50       | 3.57       | 3.87       |
| <b>45d</b> | eq                  | ax                | O                   | 5.93       | 6.11       | 5.42       | 5.31       | 4.25       | 5.21       |
|            | ax                  | ax                | O                   | 4.44       | 5.29       | 4.37       | 4.82       | 3.88       | 4.32       |

<sup>a</sup>In kcal mol<sup>-1</sup>; <sup>b</sup>disposition of ethyl with respect to the ring; <sup>c</sup>arrangement of the aromatic group relative to either oxazolidine or oxazine rings; <sup>d</sup>H-bonded heteroatom to the first OH giving rise to a pseudo-cycle.



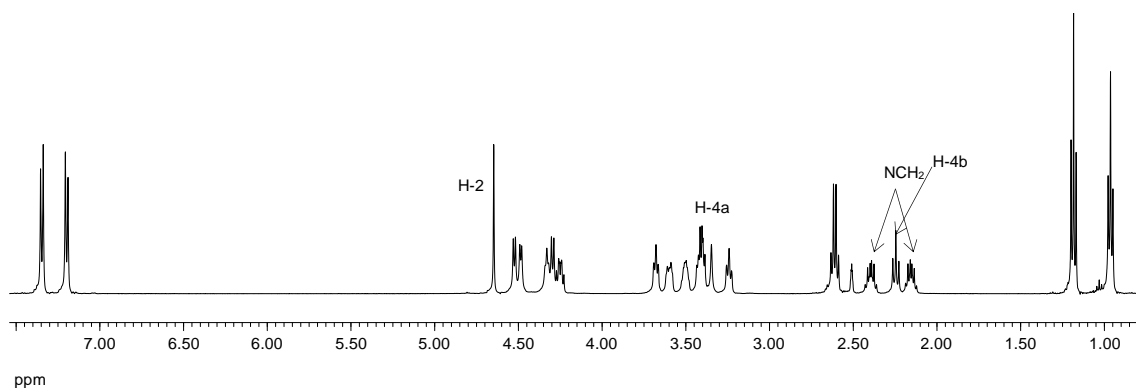

**Figure S1.**  $^1\text{H}$  NMR spectrum of **28a**, recorded in  $\text{DMSO-}d_6$ .

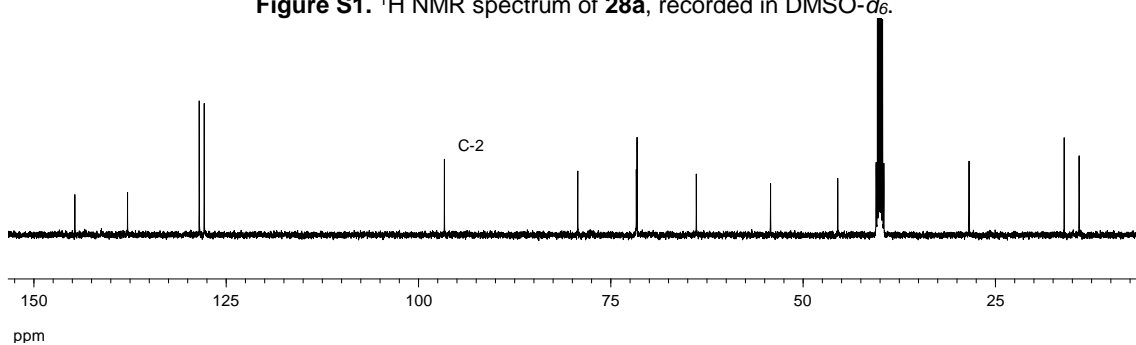

**Figure S2.**  $^{13}\text{C}$  NMR spectrum of **28a**, recorded in  $\text{DMSO-}d_6$ .

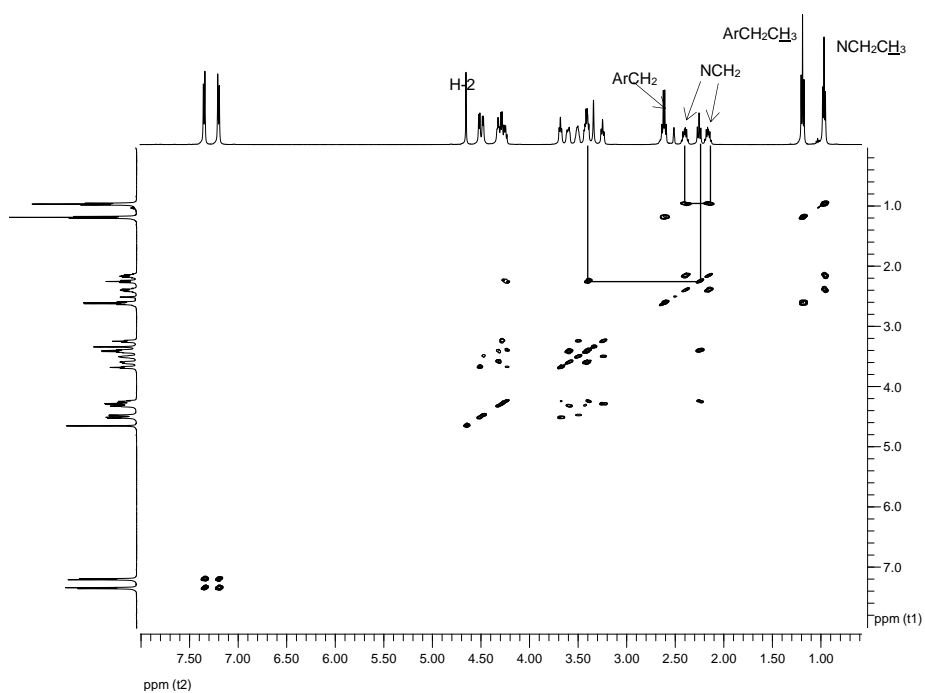

**Figure S3.**  $^1\text{H-}^1\text{H}$  COSY spectrum of **28a**, recorded in  $\text{DMSO-}d_6$ .

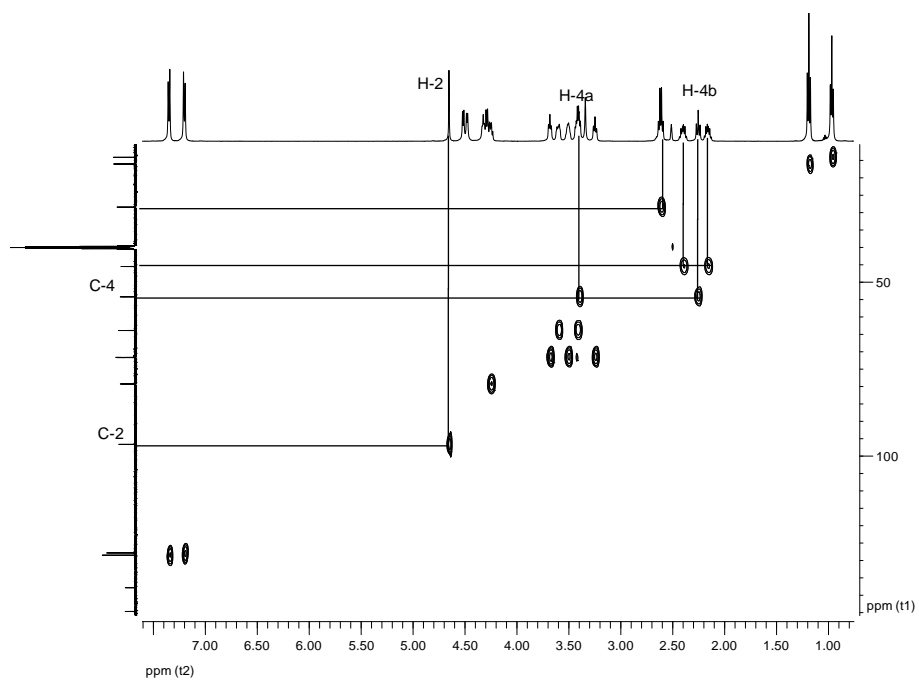

**Figure 4S.** HMBC spectrum of **28a**, recorded in DMSO- $d_6$ .

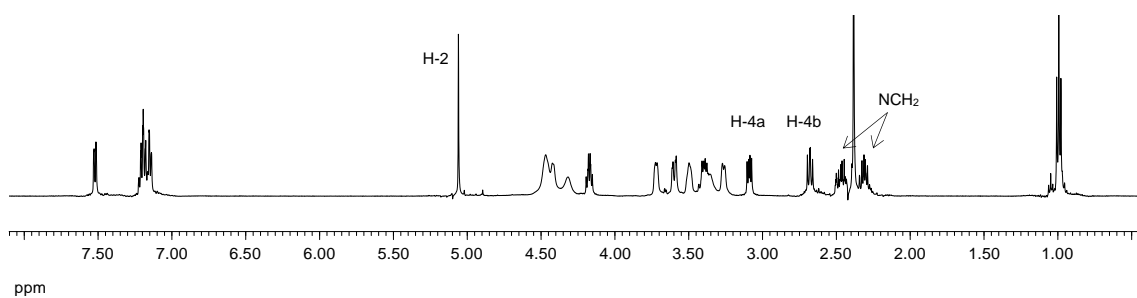

**Figure S5.**  $^1\text{H}$  NMR spectrum of **23b**, recorded in DMSO- $d_6$ .

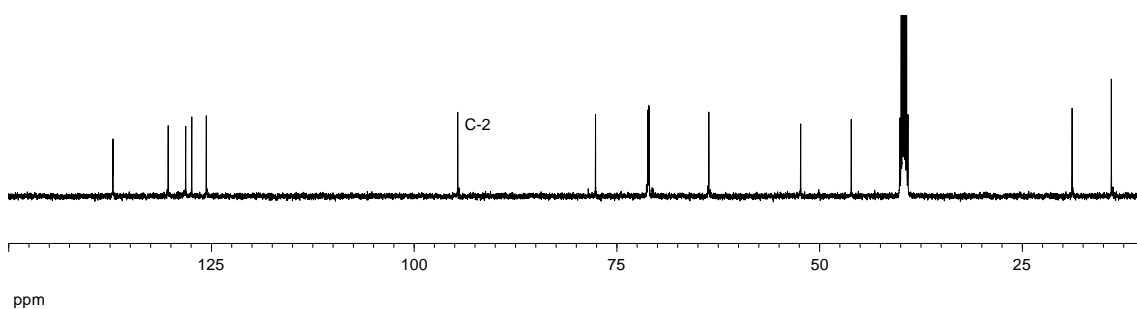

**Figure S6.**  $^{13}\text{C}$  NMR spectrum of **23b**, recorded in DMSO- $d_6$ .

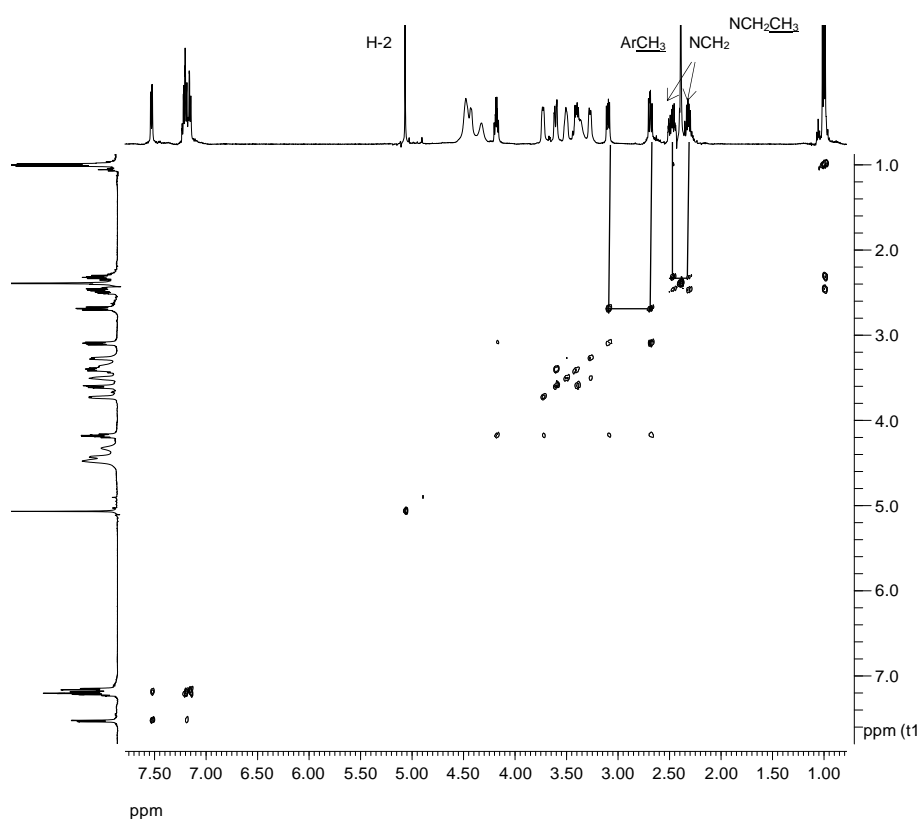

**Figure S7.**  $^1\text{H}$ - $^1\text{H}$  COSY spectrum of **23b**, recorded in  $\text{DMSO-}d_6$ .

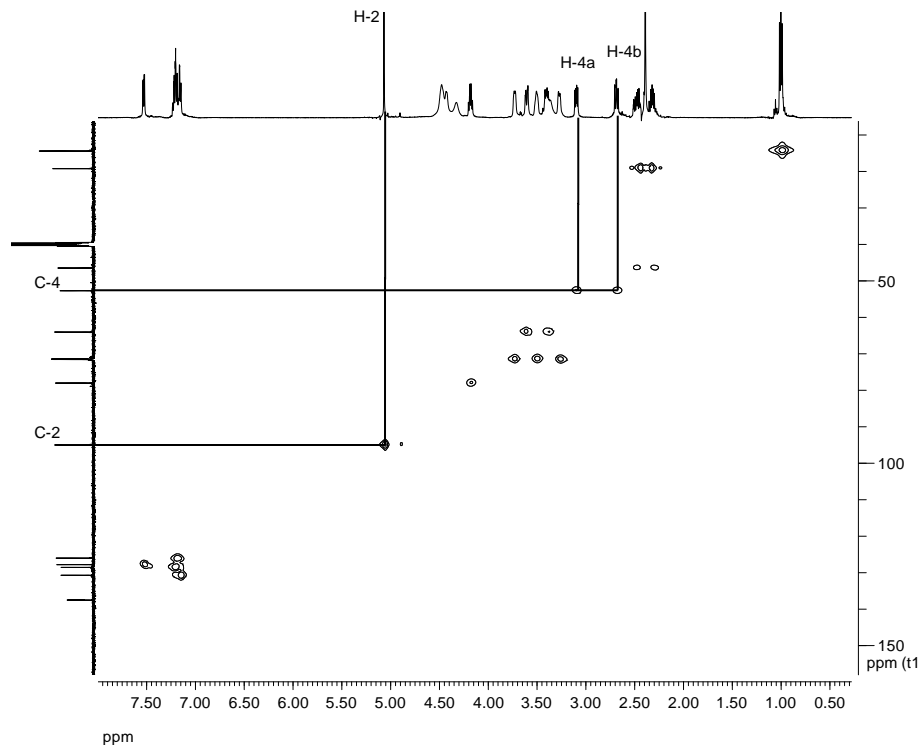

**Figure S8.** HMQC spectrum of **23b**, recorded in  $\text{DMSO-}d_6$ .

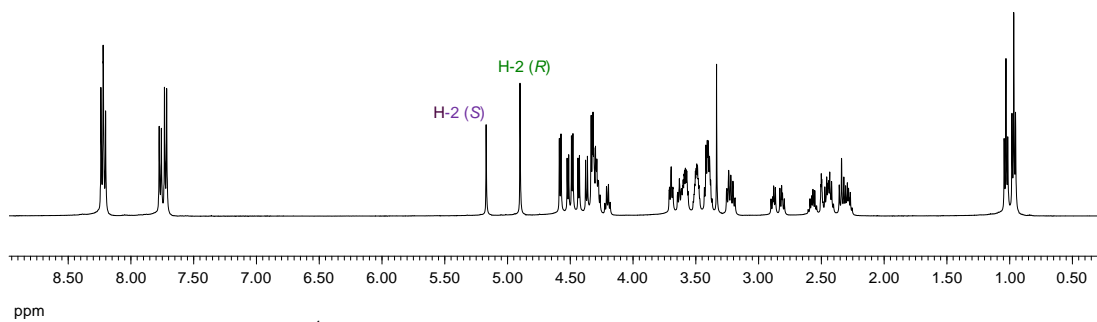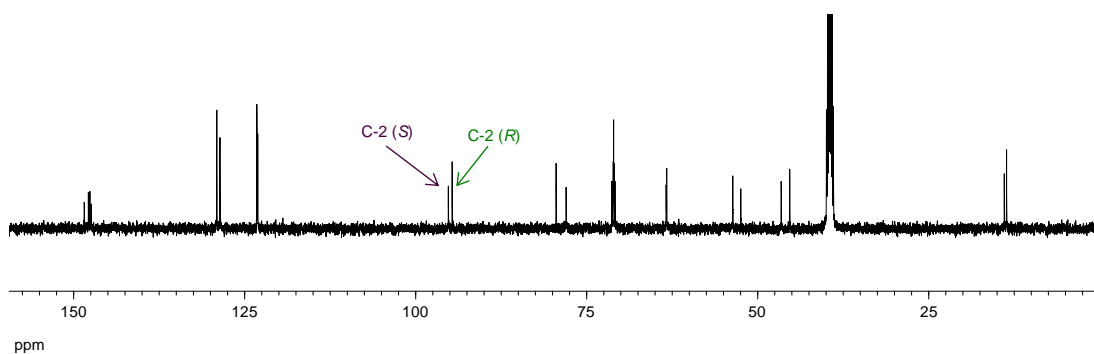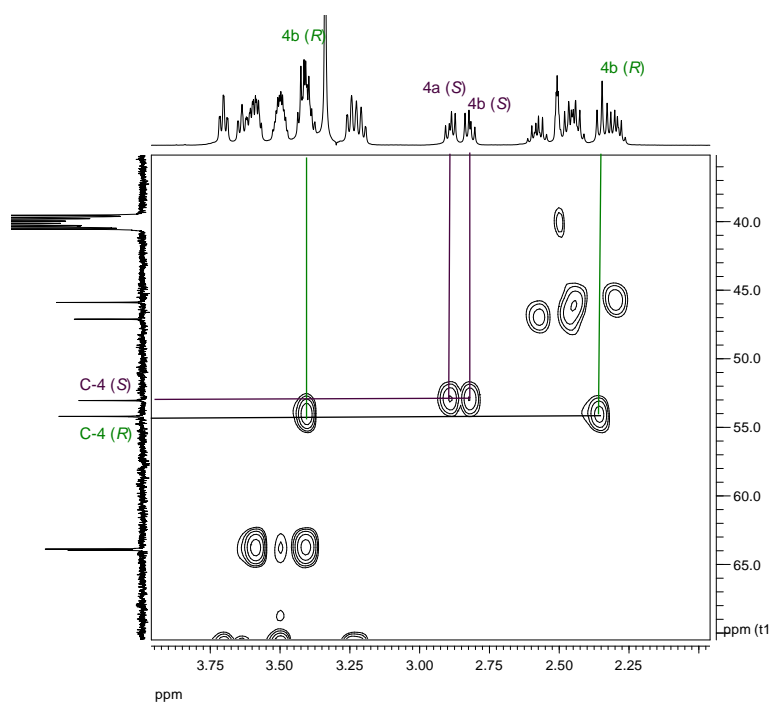

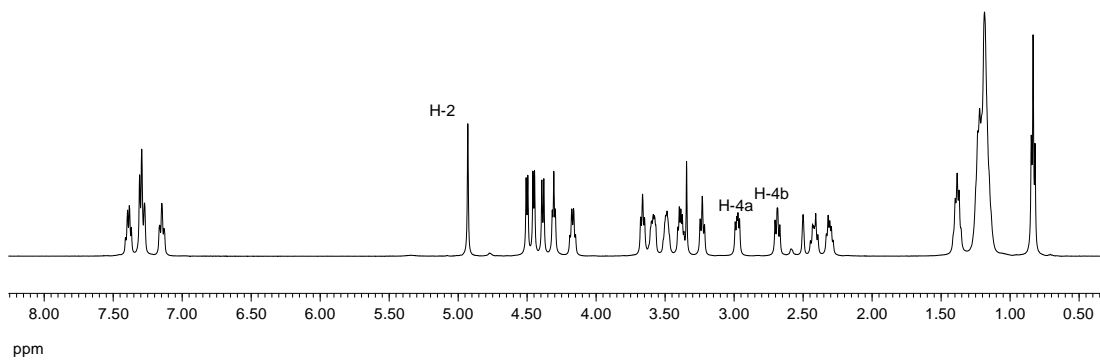

**Figure S12.**  $^1\text{H}$  NMR spectrum of **36b**, recorded in  $\text{DMSO-}d_6$ .

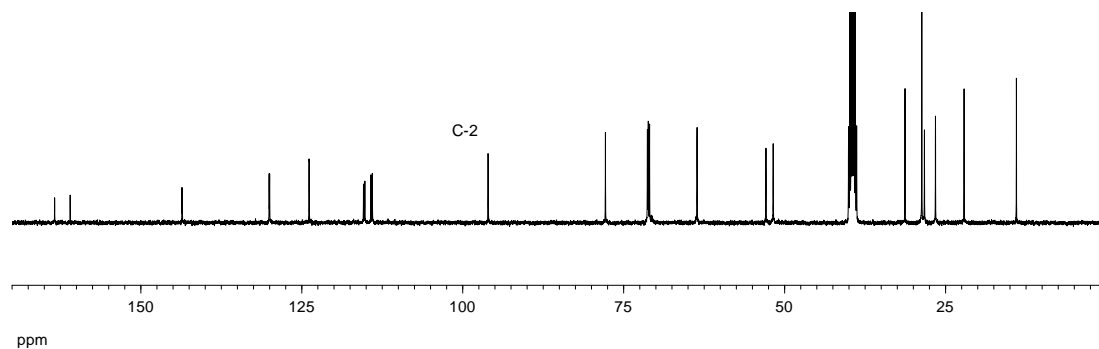

**Figure S13.**  $^{13}\text{C}$  NMR spectrum of **36b**, recorded in  $\text{DMSO-}d_6$ .

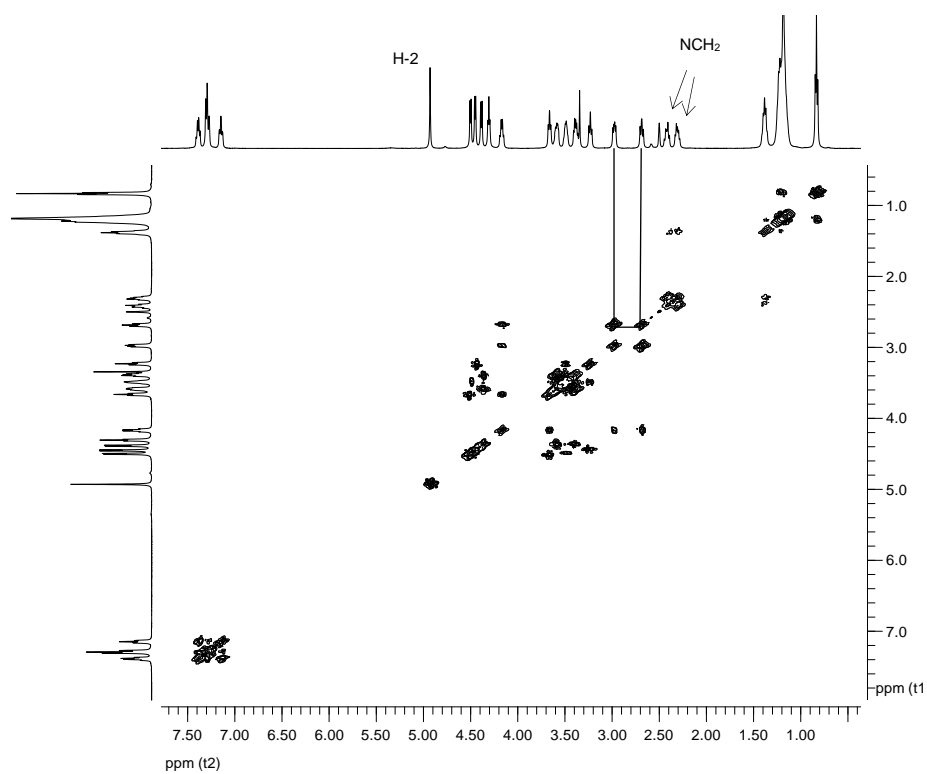

**Figure S14.**  $^1\text{H-}^1\text{H}$  COSY spectrum of **36b**, recorded in  $\text{DMSO-}d_6$ .

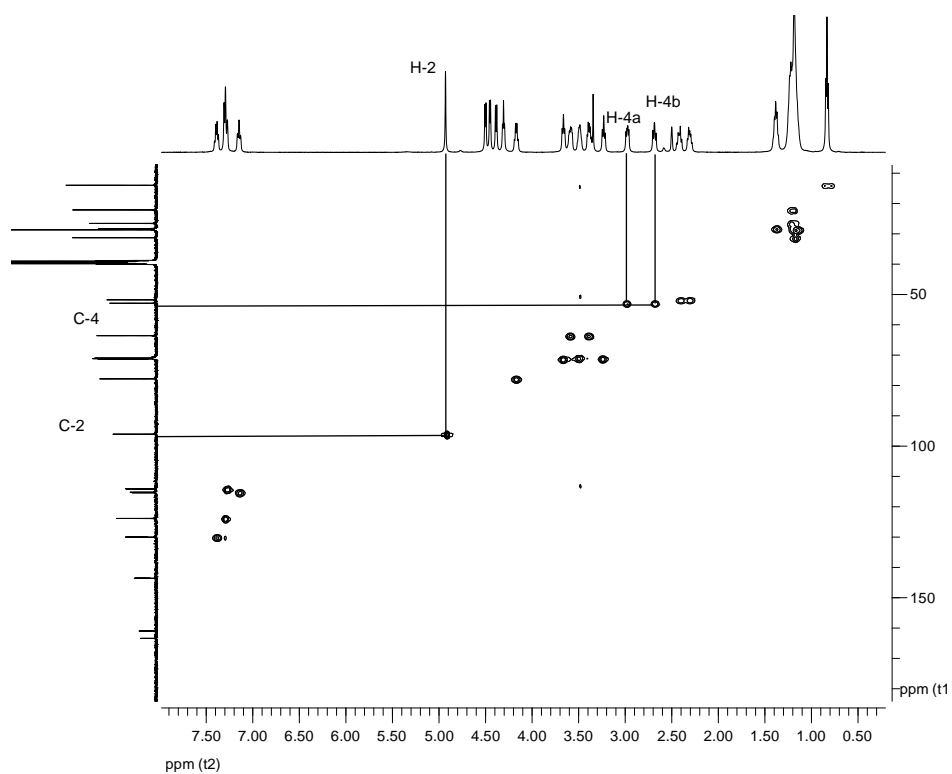

Figure S15. HMQC spectrum of **36b**, recorded in DMSO- $d_6$ .

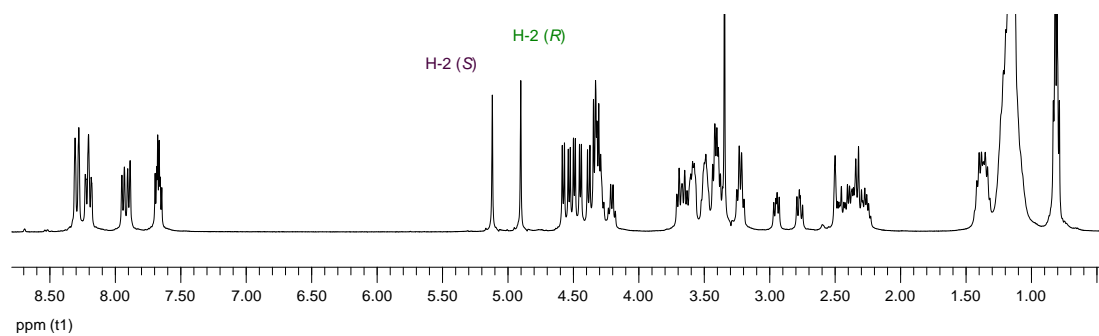

Figure S16.  $^1\text{H}$  NMR spectrum of **35a** and **35b**, recorded in DMSO- $d_6$ .

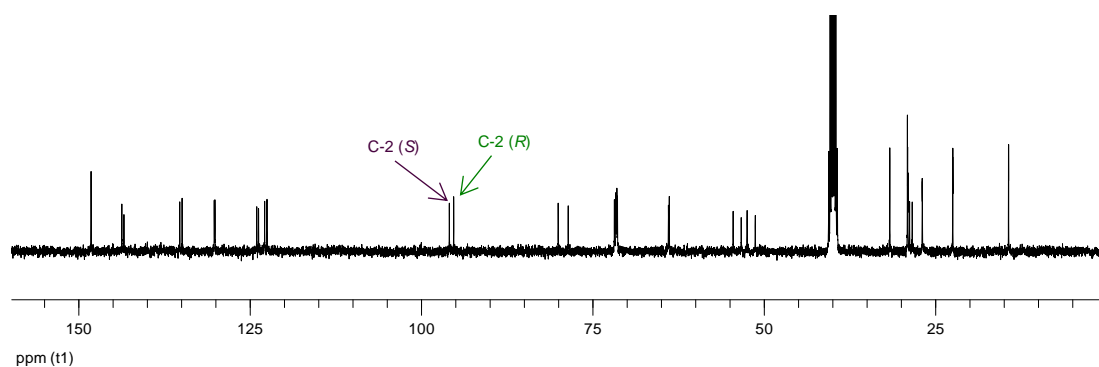

Figure S17.  $^{13}\text{C}$  NMR spectrum of **35a** and **35b**, recorded in DMSO- $d_6$ .

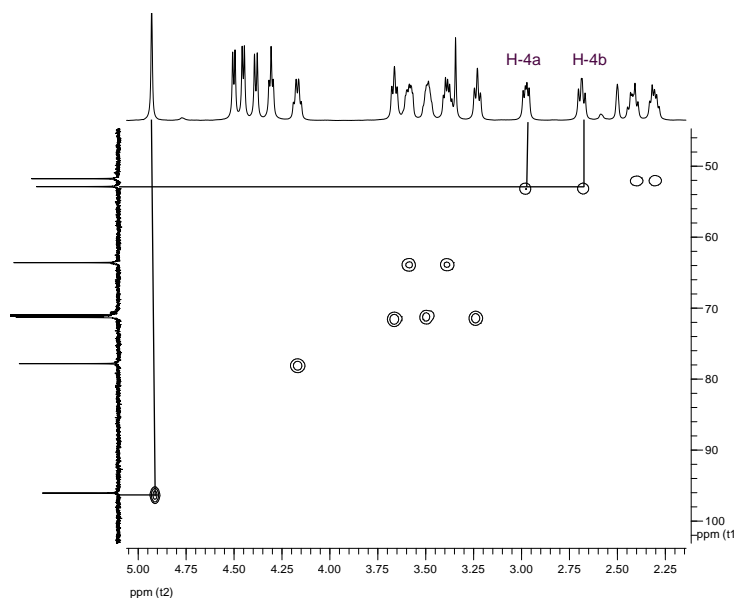

Figure S18.  $^1\text{H}$ - $^1\text{H}$  COSY spectrum of **35b**, recorded in  $\text{DMSO-}d_6$ .

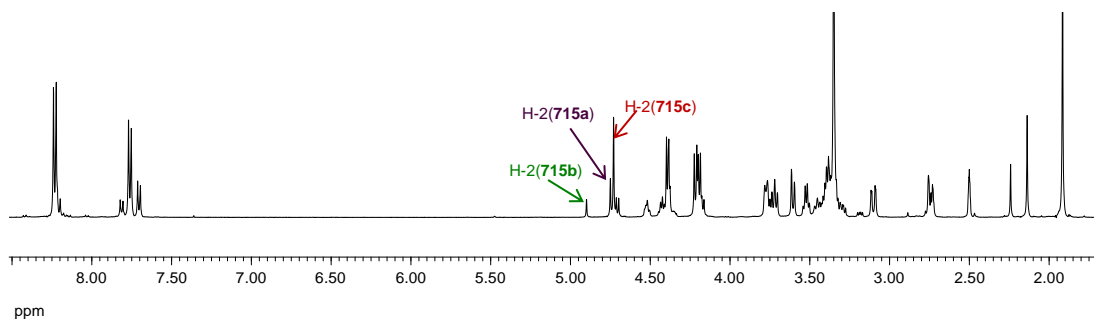

Figure S19.  $^1\text{H}$  NMR spectrum of **43** (**43a**, **43b** and **43c**), recorded in  $\text{DMSO-}d_6$ .

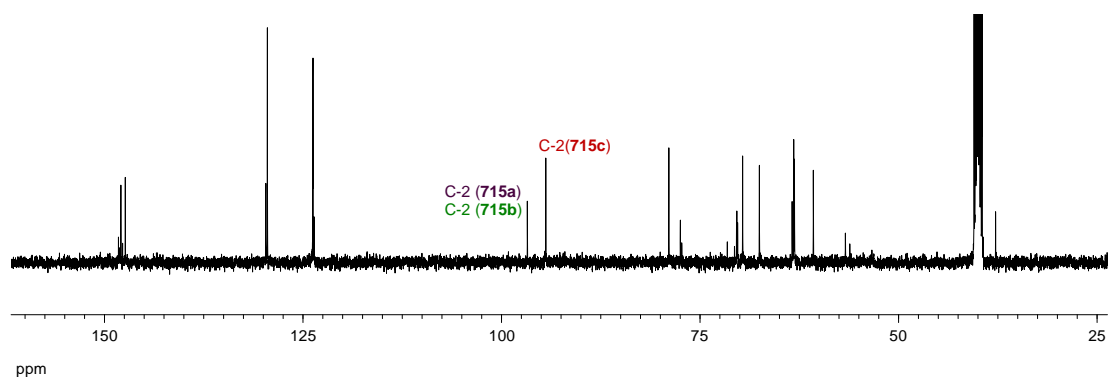

Figure S20.  $^{13}\text{C}$  NMR spectrum of **43** (**43a**, **43b** and **43c**), recorded in  $\text{DMSO-}d_6$ .

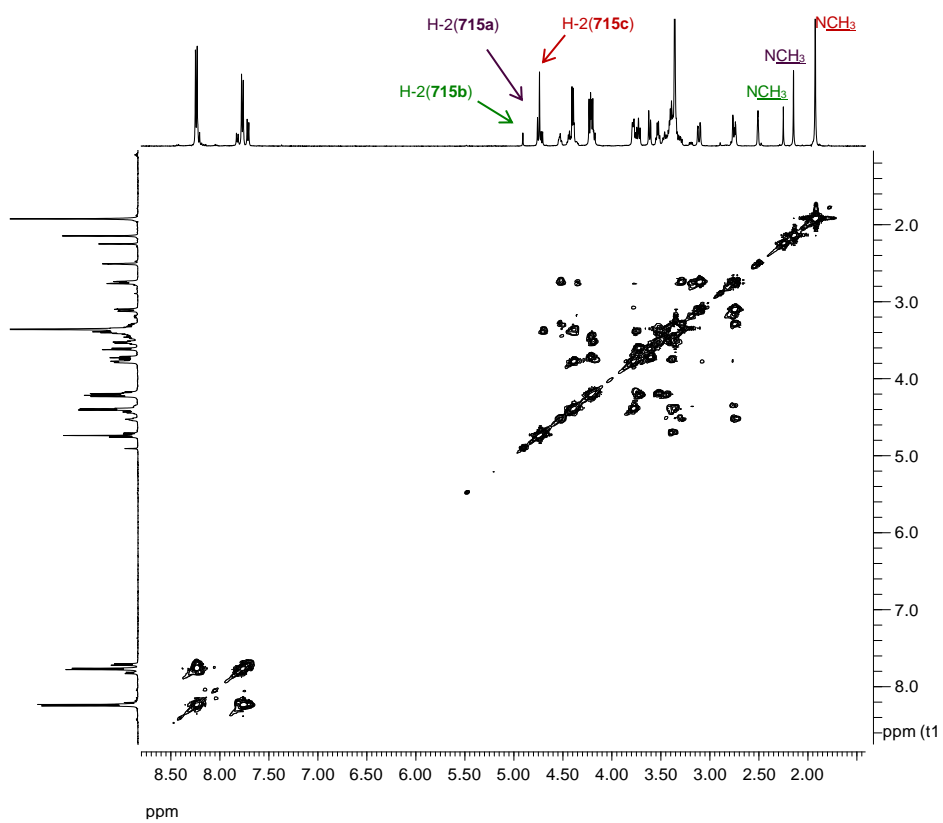

Figure S21.  $^1\text{H}$ - $^1\text{H}$  COSY spectrum of **43** (**43a**, **43b** and **43c**), recorded in  $\text{DMSO-}d_6$ .



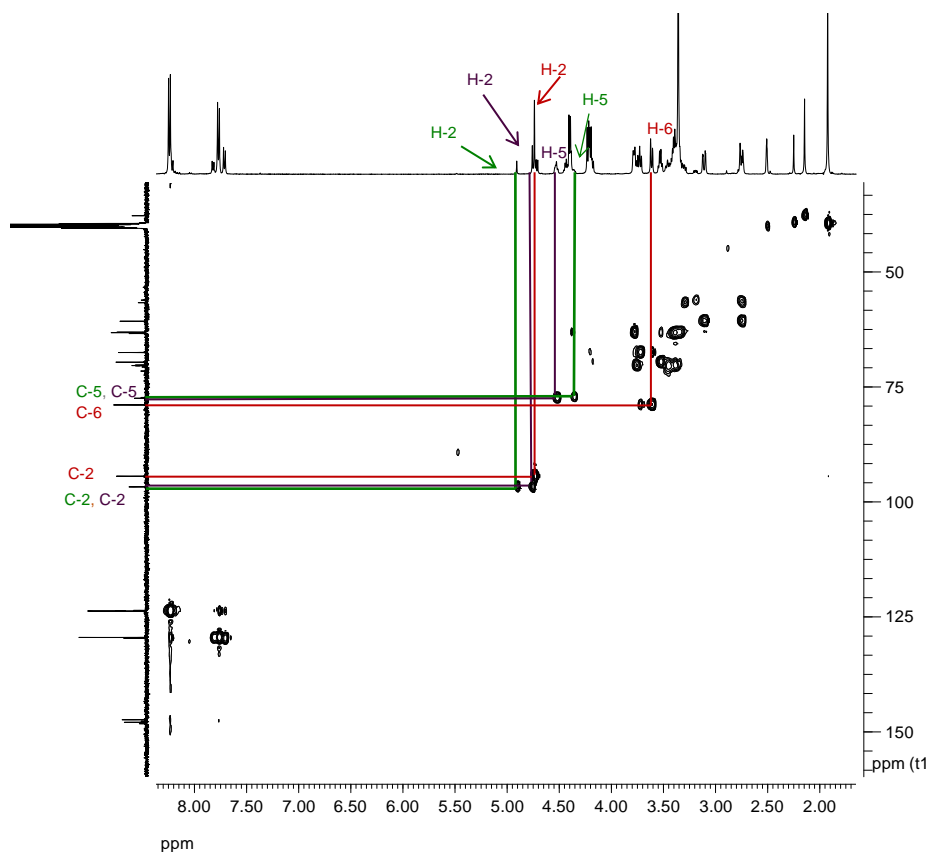

Figure S22. HMQC spectrum of **43** (**43a**, **43b** and **43c**), recorded in  $\text{DMSO-}d_6$ .

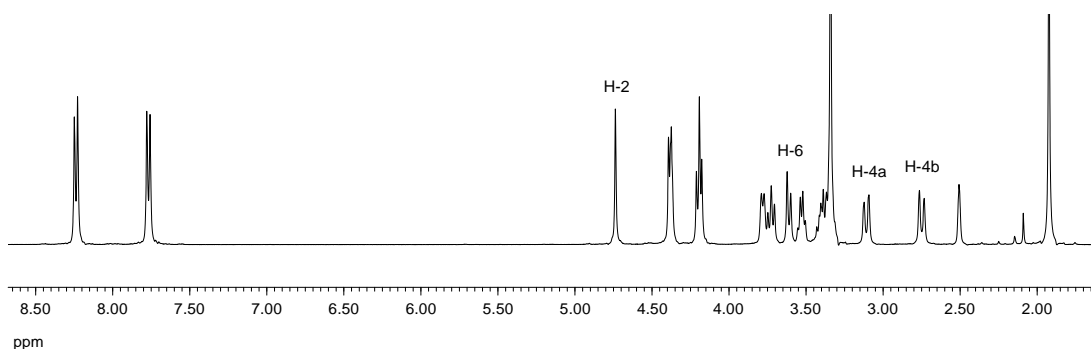

Figure S23.  $^1\text{H}$  NMR spectrum of **43c**, recorded in  $\text{DMSO-}d_6$ .

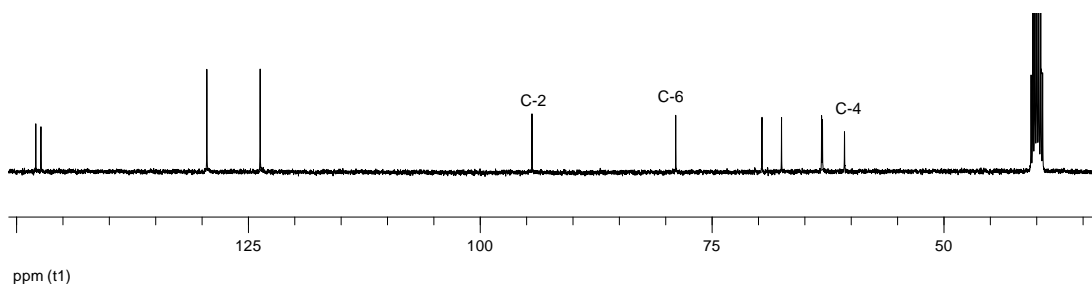

Figure S24.  $^{13}\text{C}$  NMR spectrum of **43c**, recorded in  $\text{DMSO-}d_6$ .

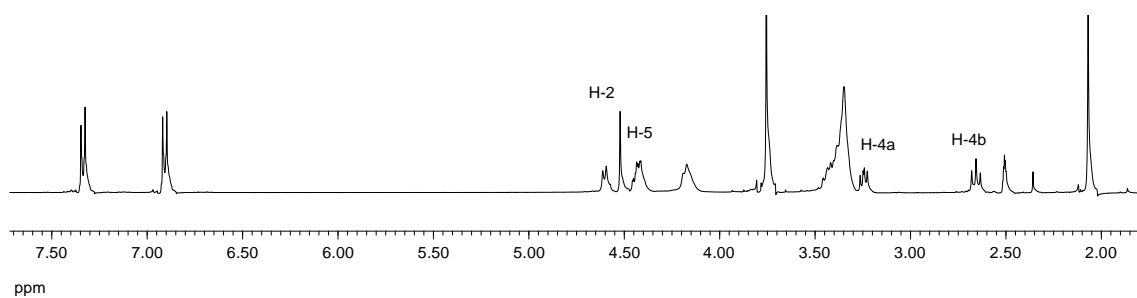

**Figure S25.**  $^1\text{H}$  NMR spectrum of **45a**, recorded in  $\text{DMSO-}d_6$ .

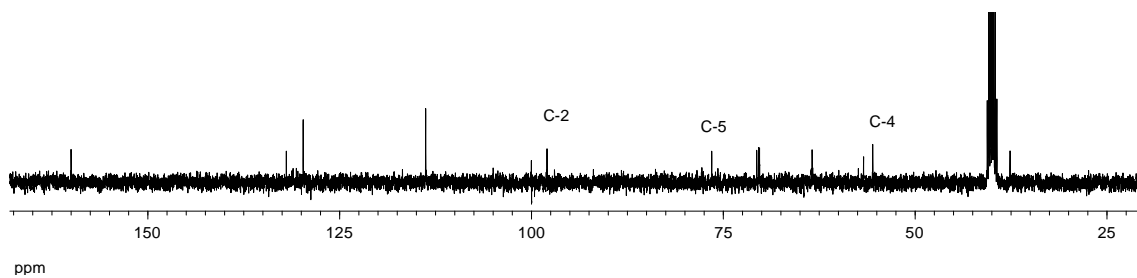

**Figure S26.**  $^{13}\text{C}$  NMR spectrum of **45a**, recorded in  $\text{DMSO-}d_6$ .

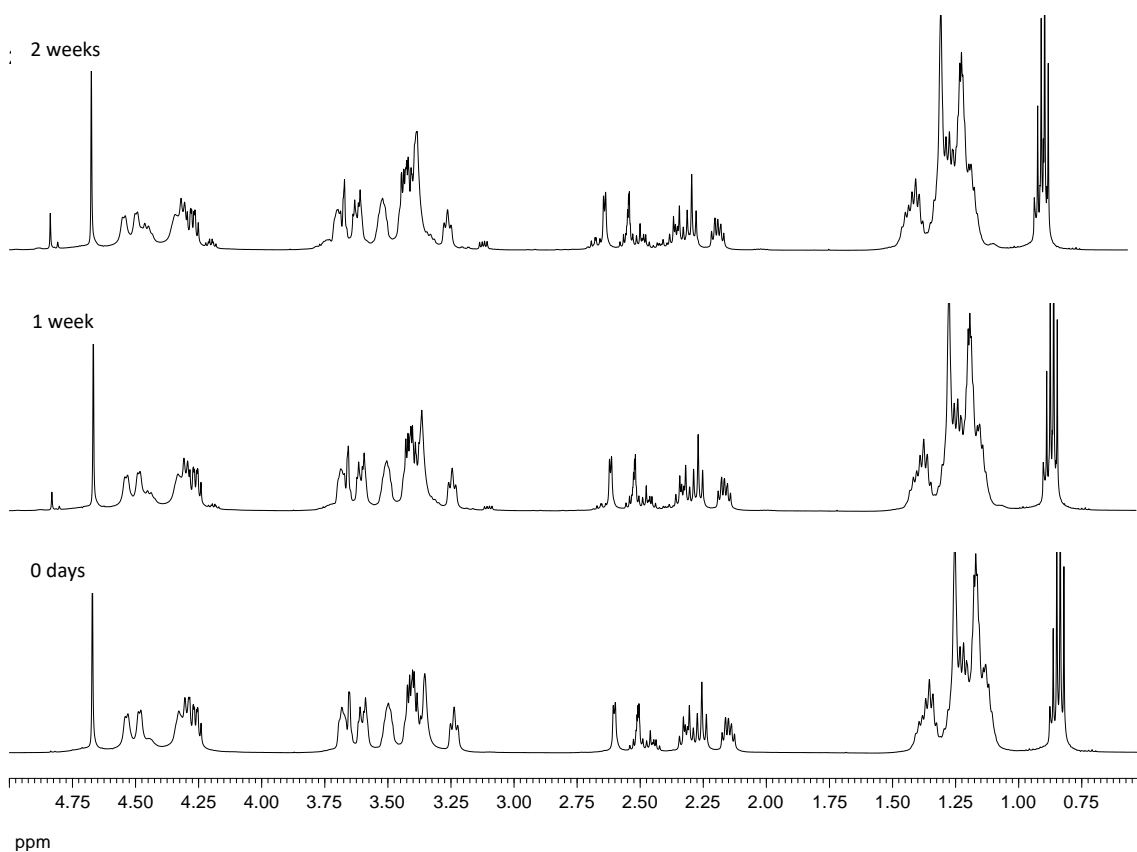

**Figure S27.** Isomerization of **38a** (*R*-configured oxazolidine) as monitored in solution for two weeks ( $\text{DMSO-}d_6$ ).

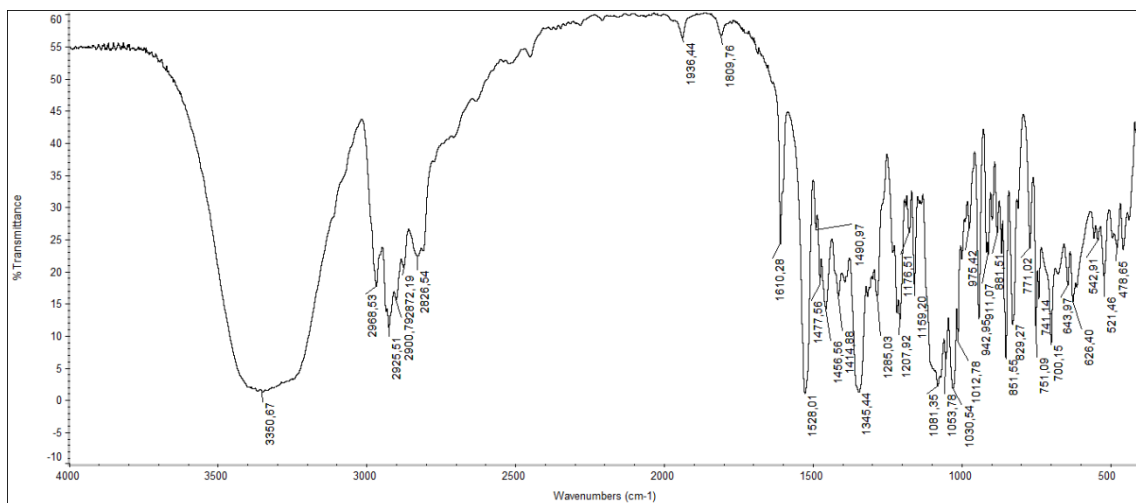

Figure S28. IR spectrum of 21a and 21b.

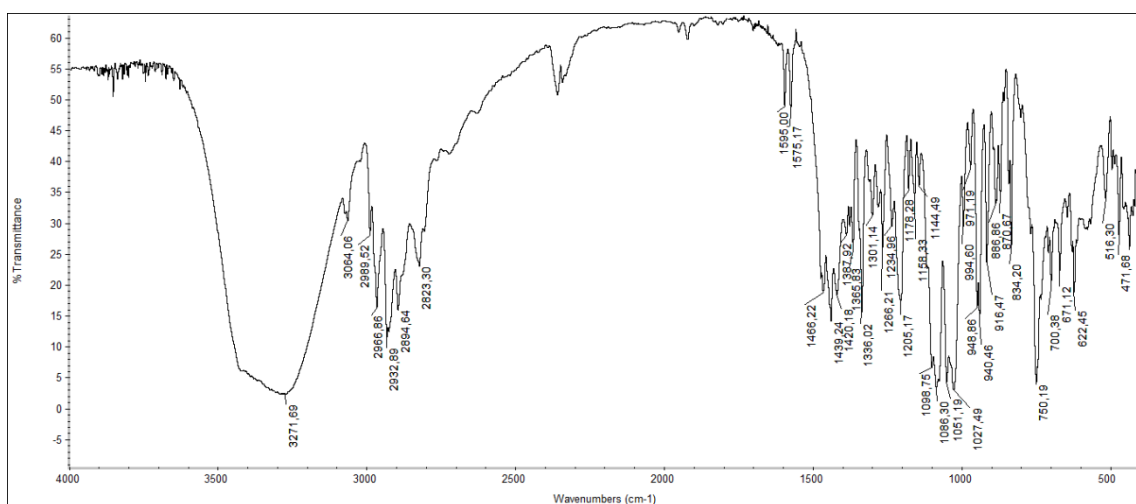

Figure S29. IR spectrum of 22a and 22b.

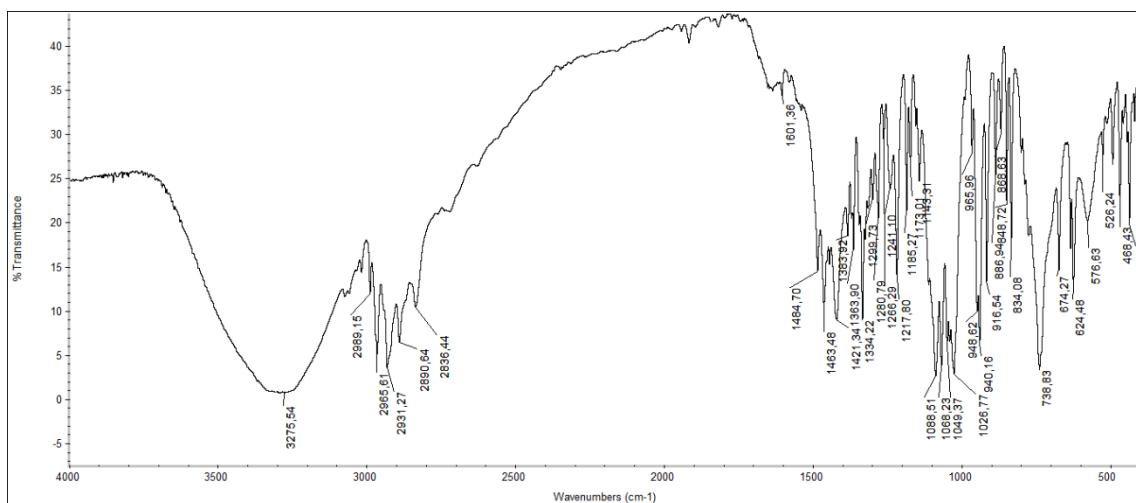

Figure S30. IR spectrum of 23a and 23b.

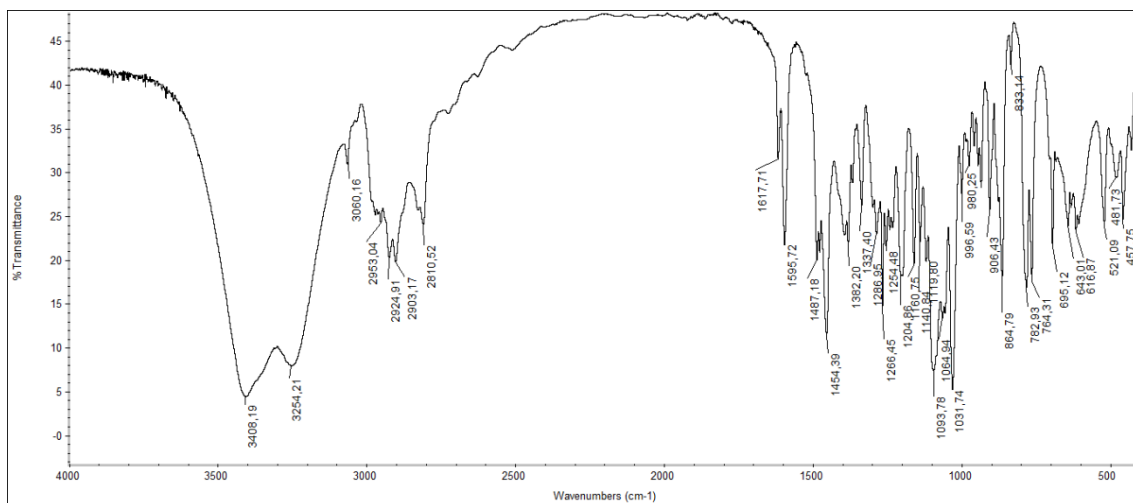

Figure S31. IR spectrum of 24a and 24b.

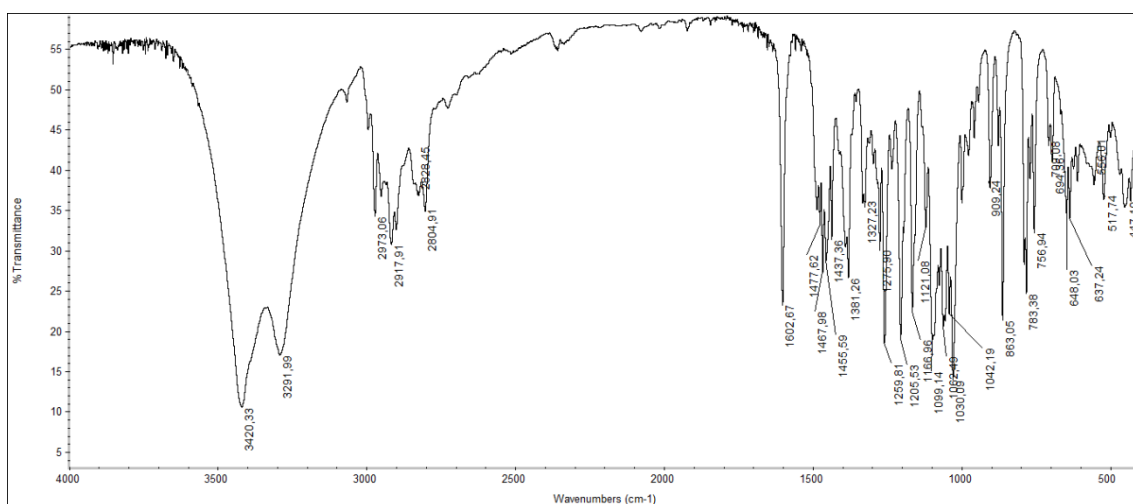

Figure S32. IR spectrum of 25a.

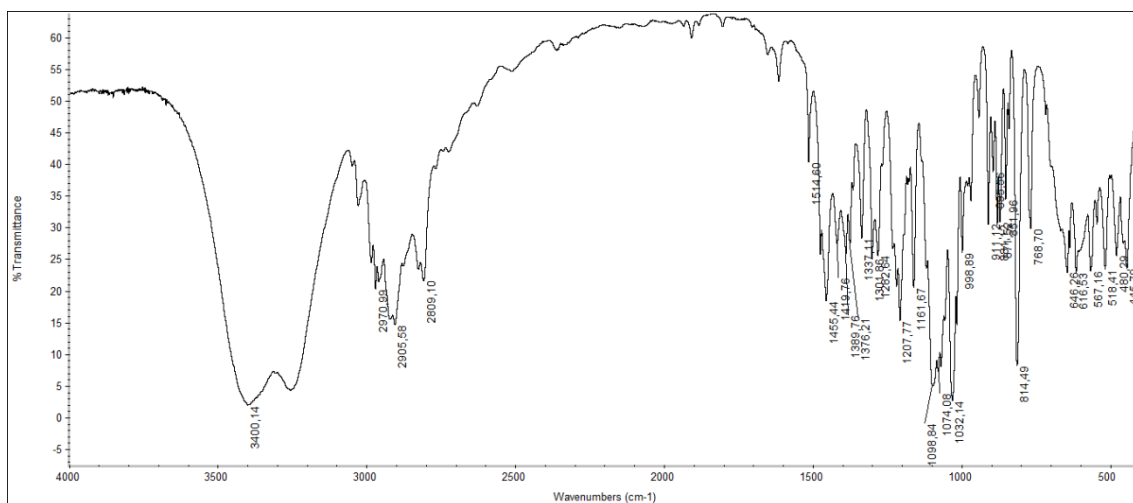

Figure S33. IR spectrum of 26a.

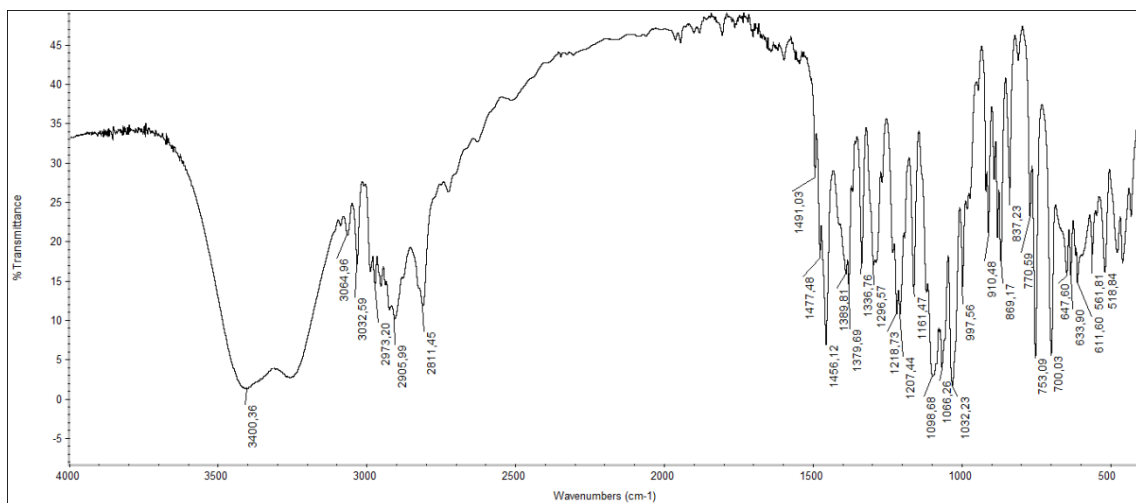

Figure S34. IR spectrum of 27a.

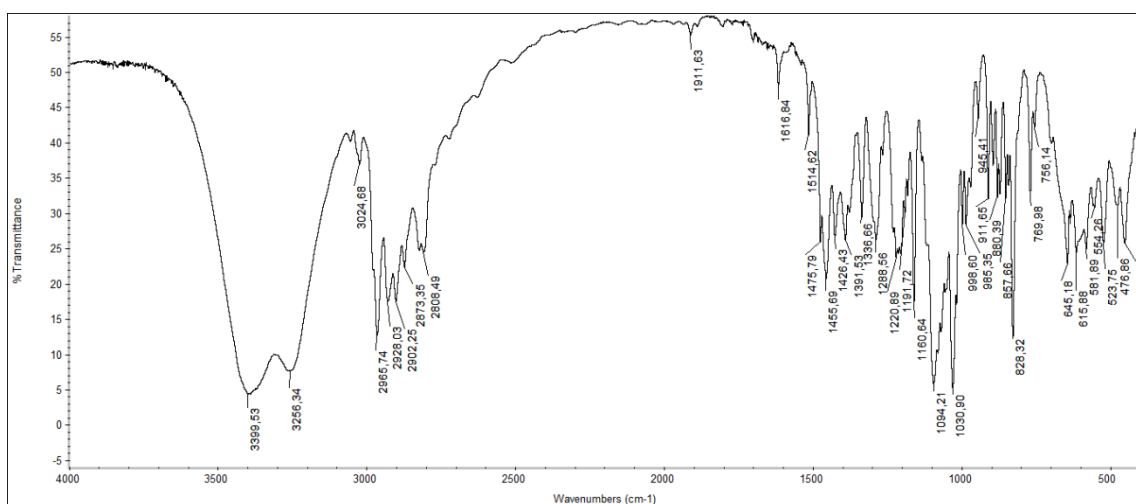

Figure S35. IR spectrum of 28a.

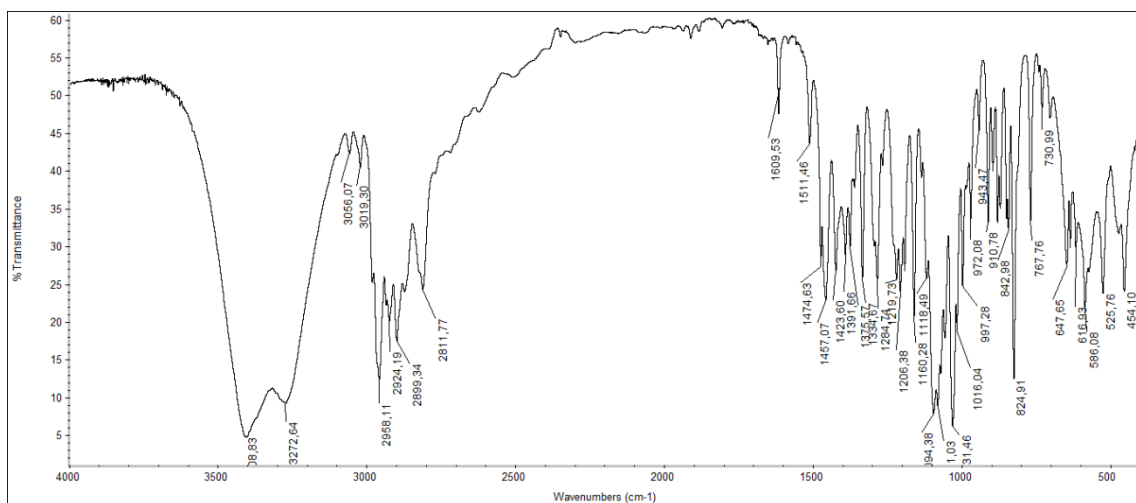

Figure S36. IR spectrum of 29a.

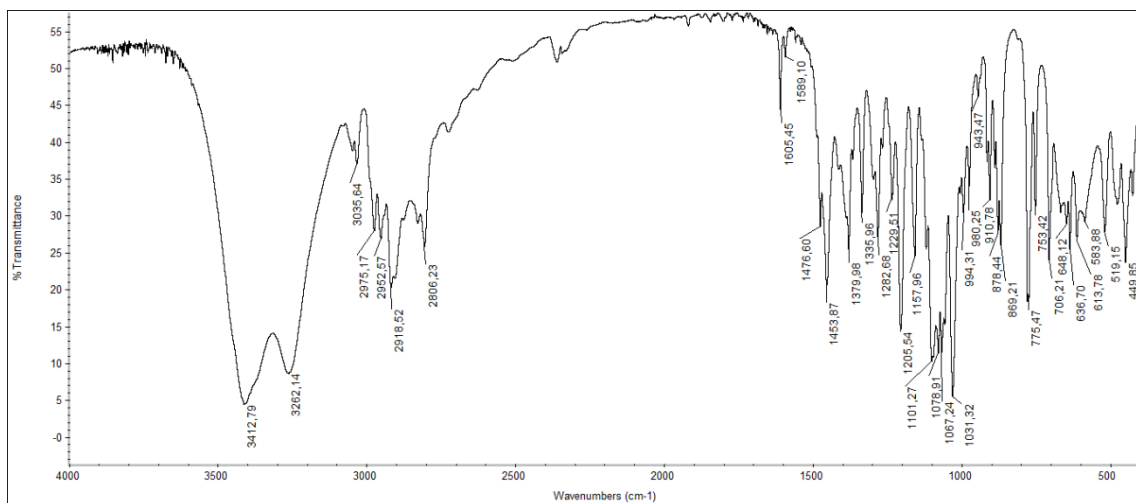

Figure S37. IR spectrum of 30a.

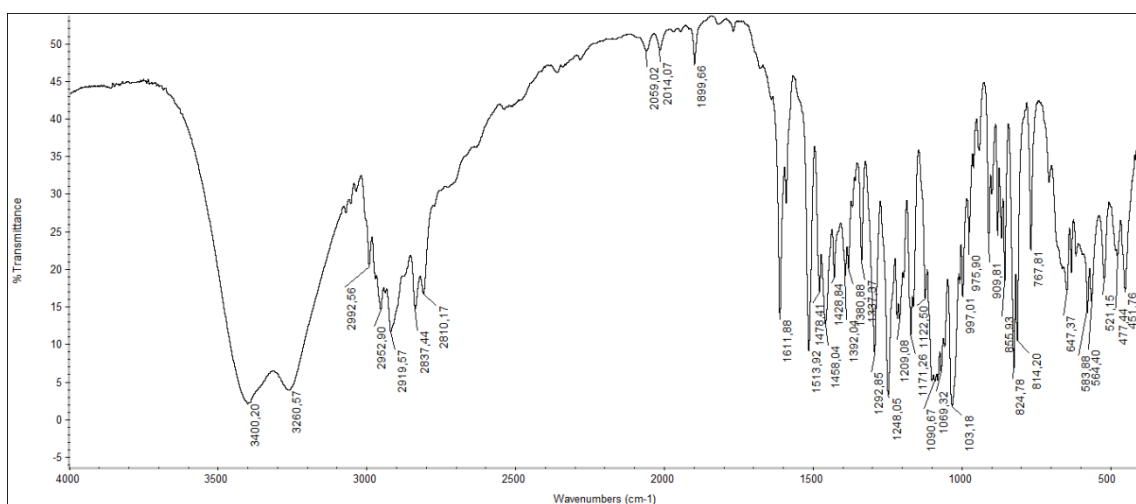

Figure S38. IR spectrum of 31a.

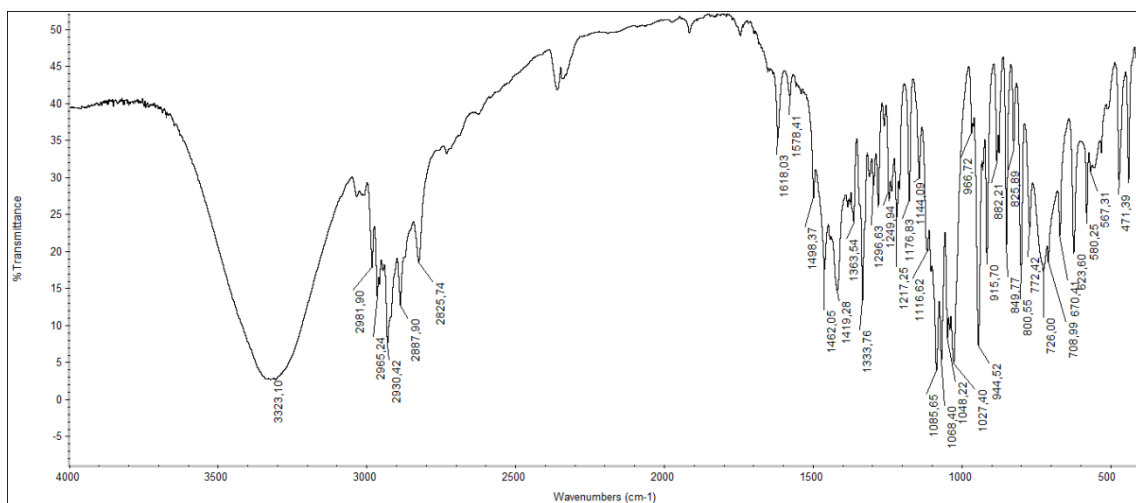

Figure S39. IR spectrum of 32b.

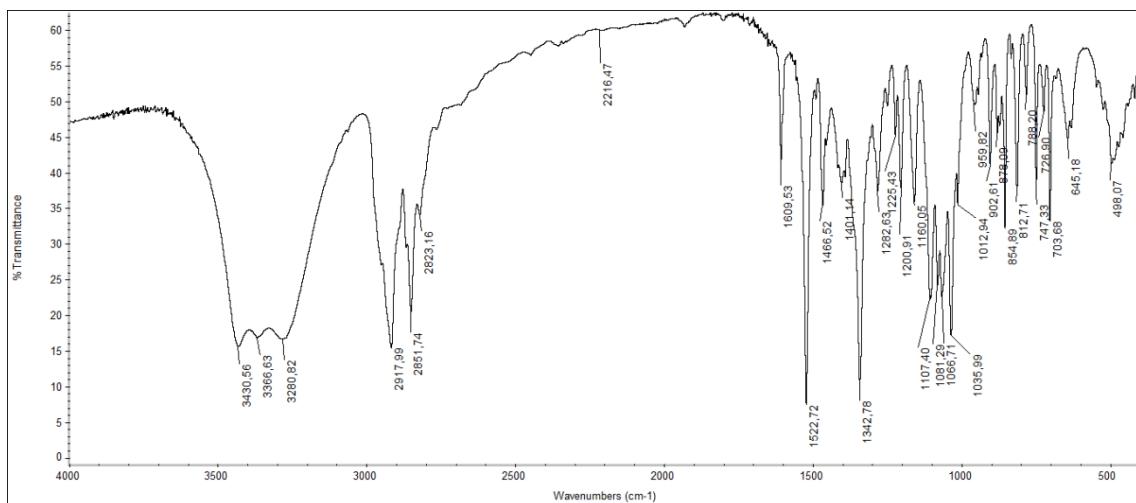

Figure S40. IR spectrum of 34b.

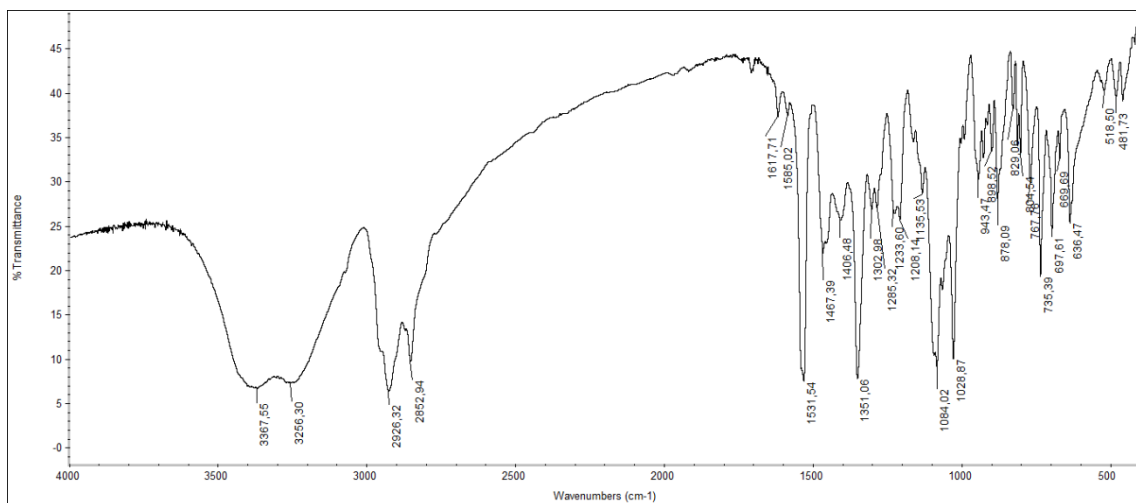

Figure S41. IR spectrum of 35a and 35b.

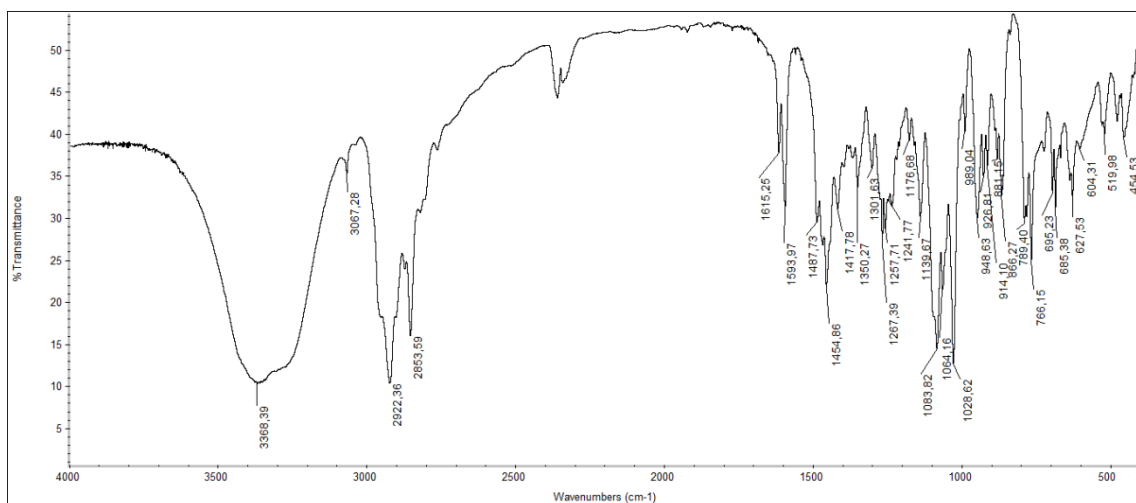

Figure S42. IR spectrum of 36a and 36b.

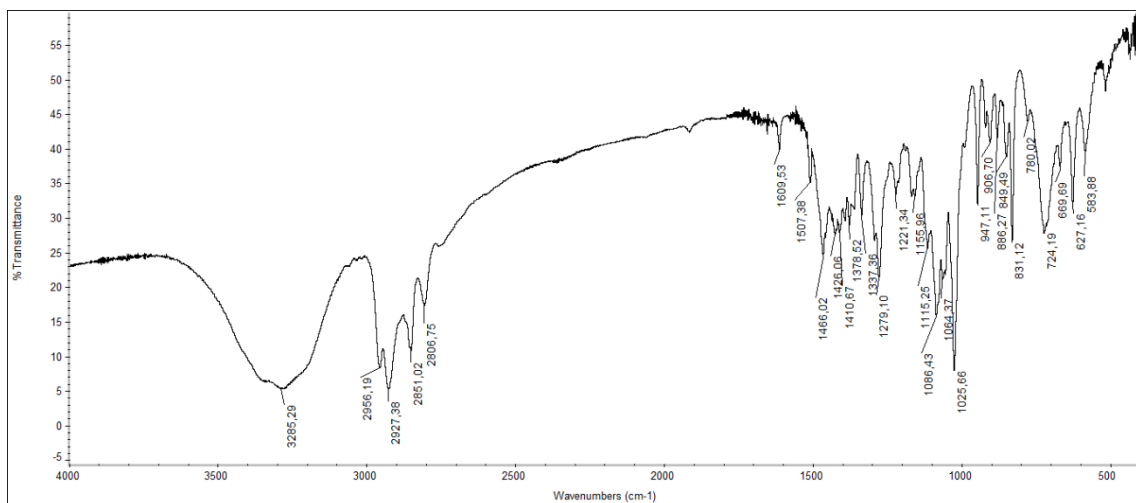

Figure S43. IR spectrum of 37a and 37b.

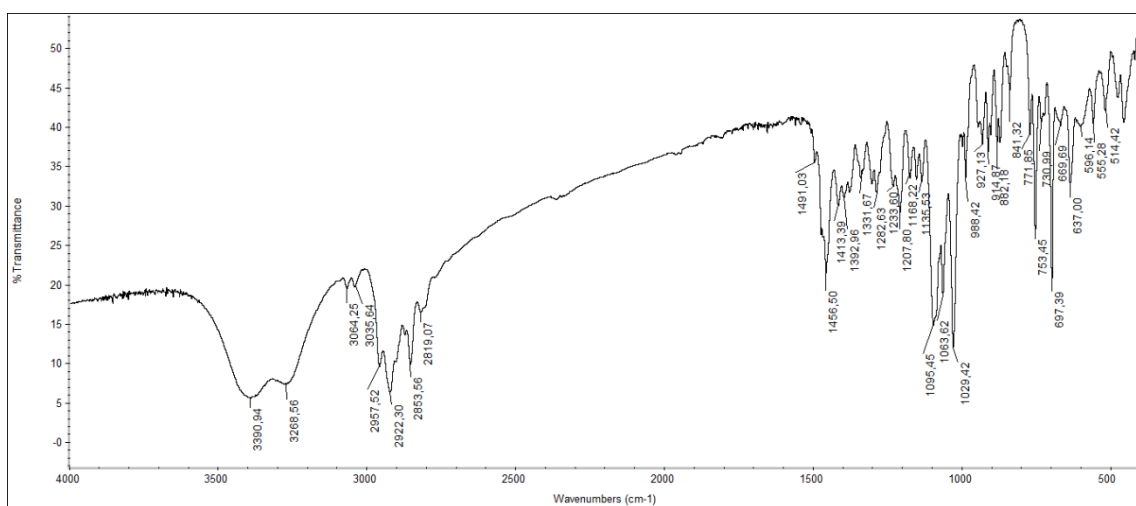

Figure S44. IR spectrum of 38a and 38b.

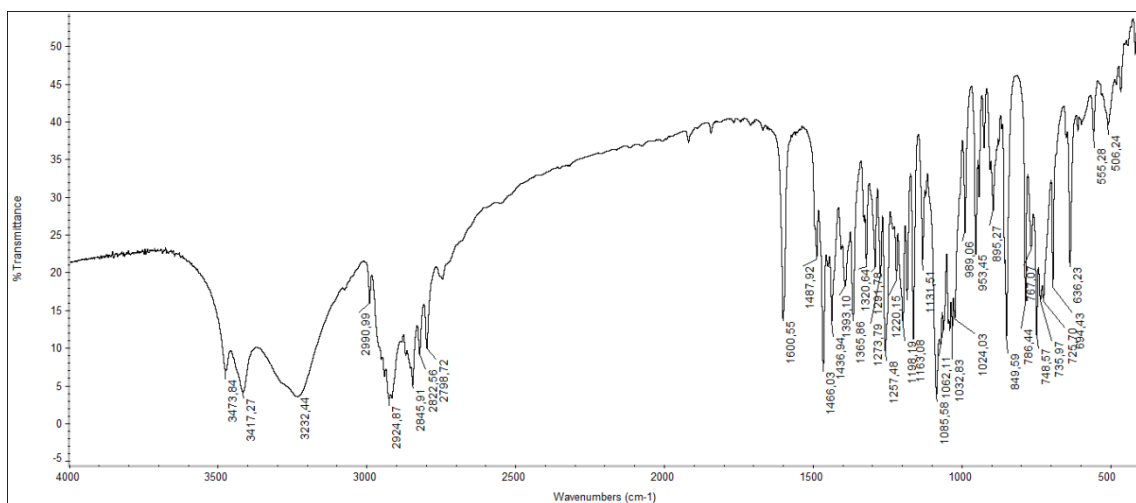

Figure S45. IR spectrum of 39a.



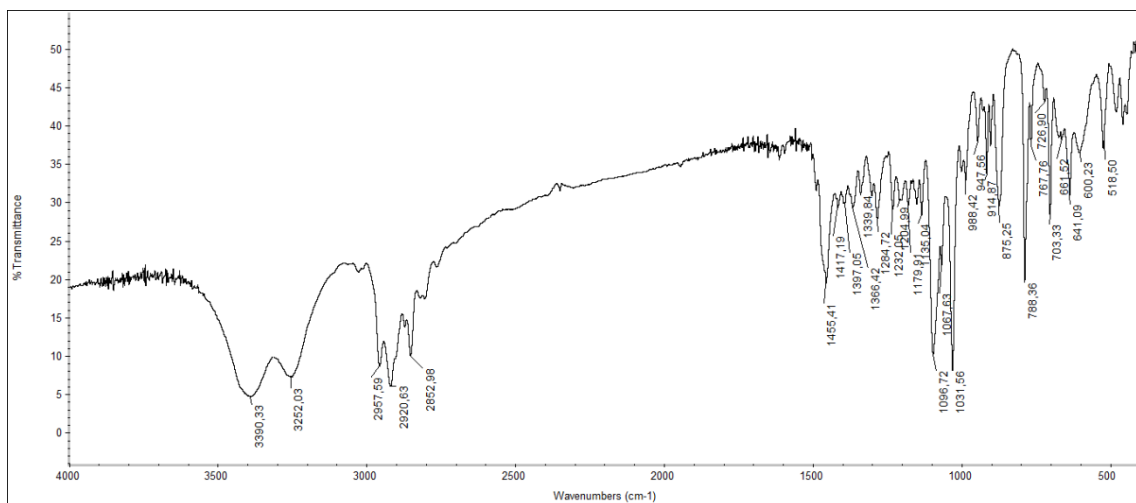

Figure S46. IR spectrum of 40a.

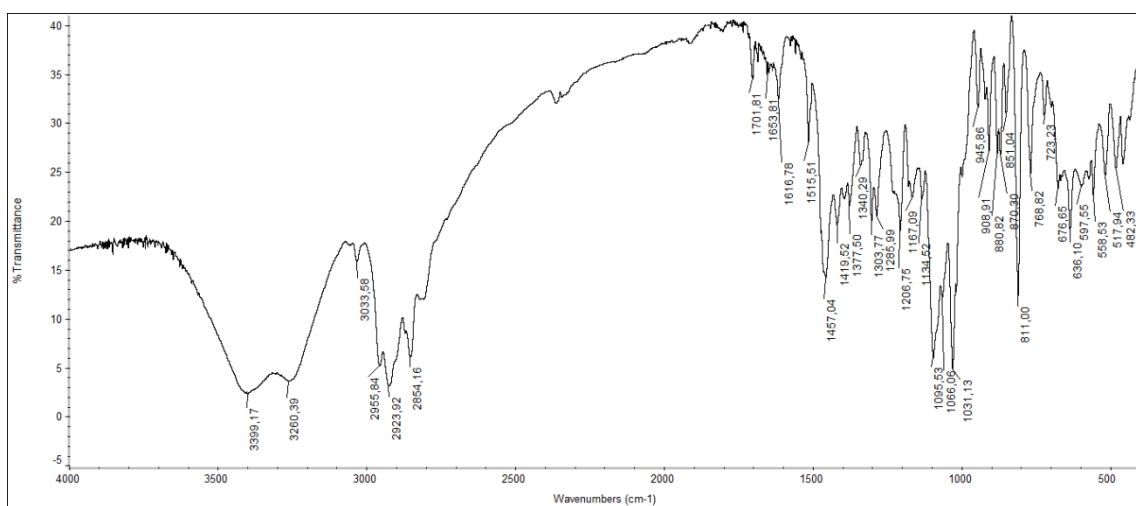

Figure S47. IR spectrum of 41a.

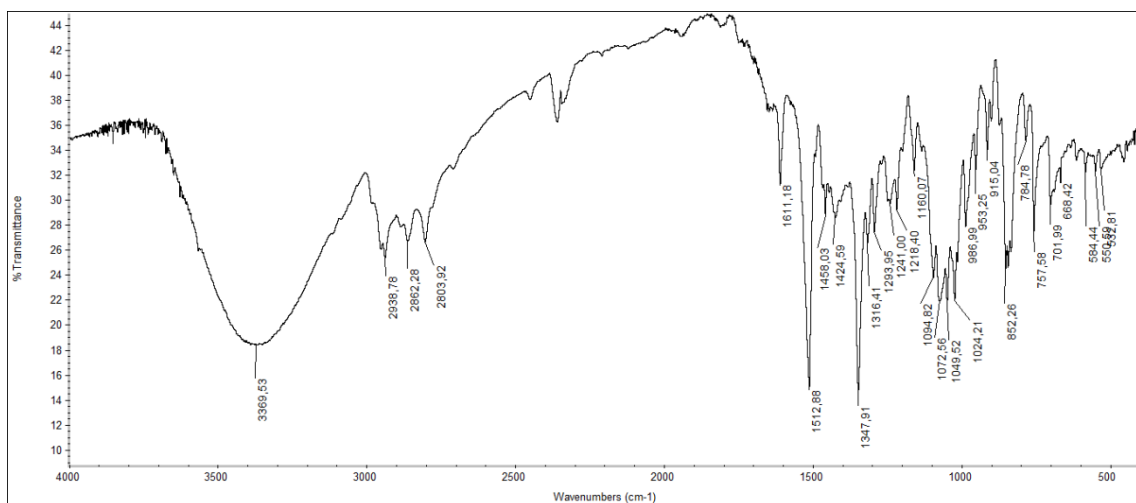

Figure S48. IR spectrum of 43a, 43b and 43c.

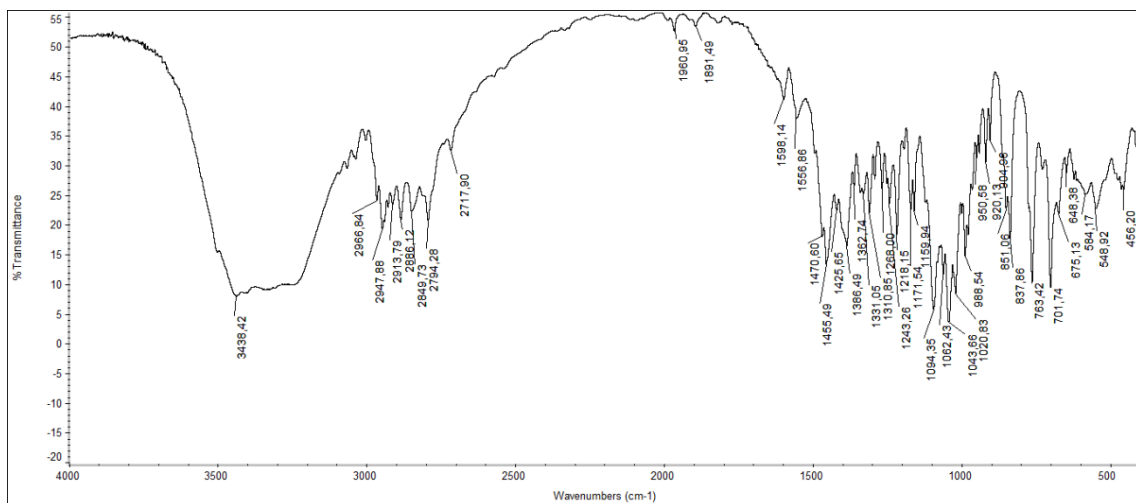

Figure S49. IR spectrum of 44a, 44b and 44c.

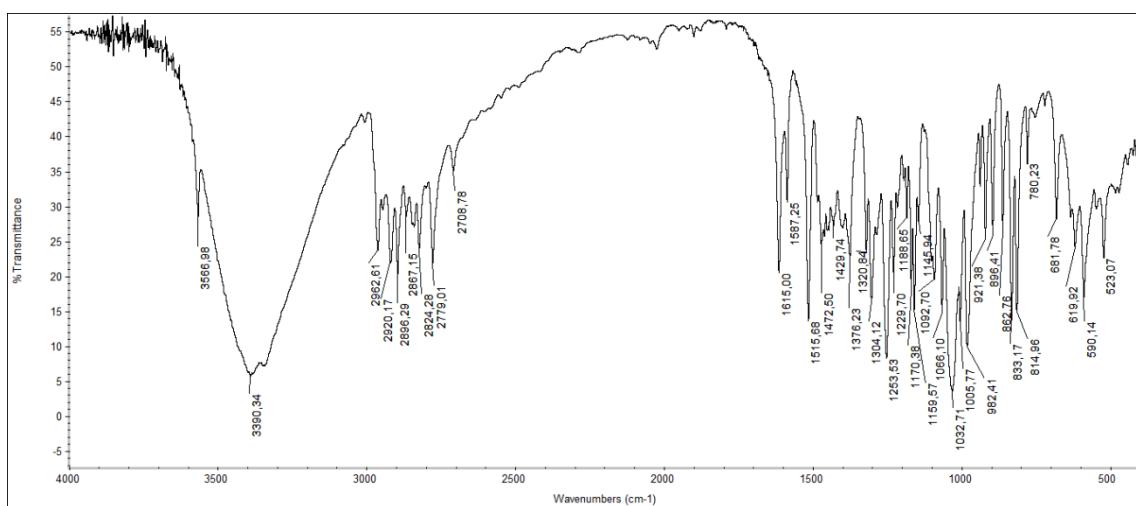

Figure S50. IR spectrum of 45a, 45b and 45c.

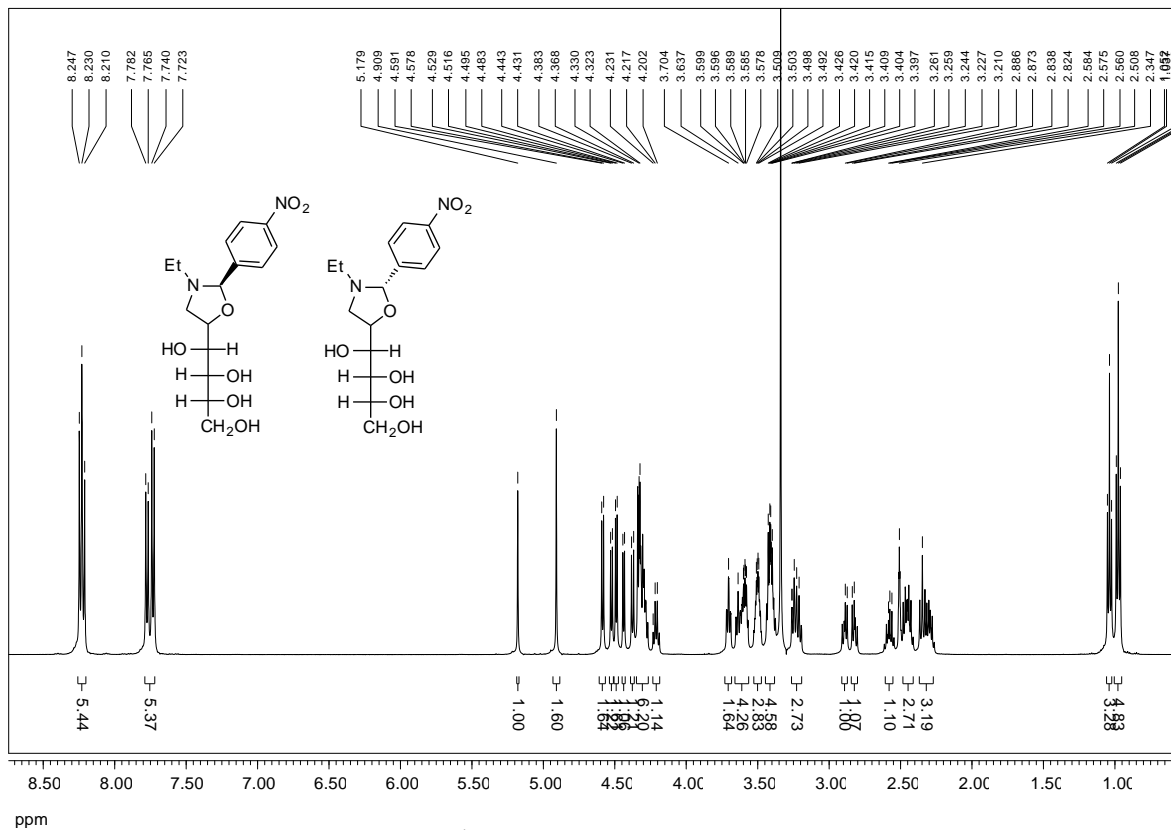

Figure S51.  $^1\text{H}$  NMR spectrum of 21a and 21b.

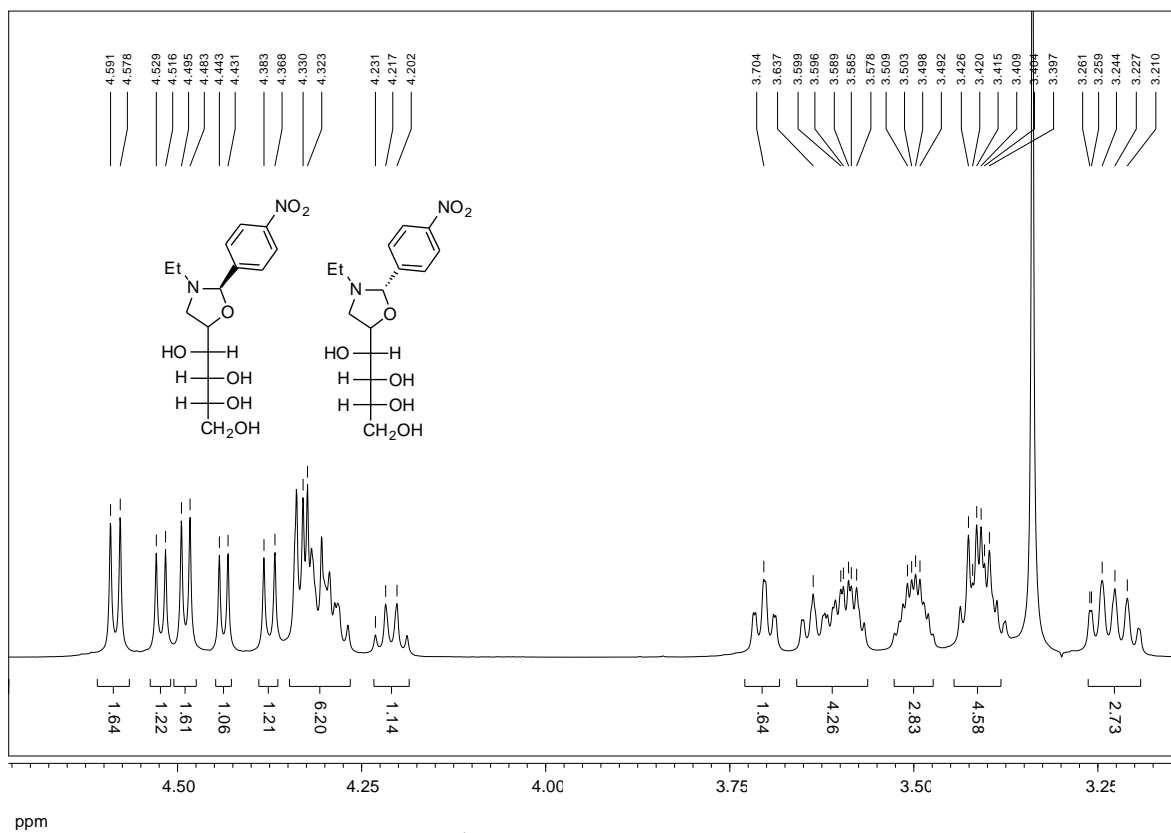

Figure S52.  $^1\text{H}$  NMR spectrum of 21a and 21b.

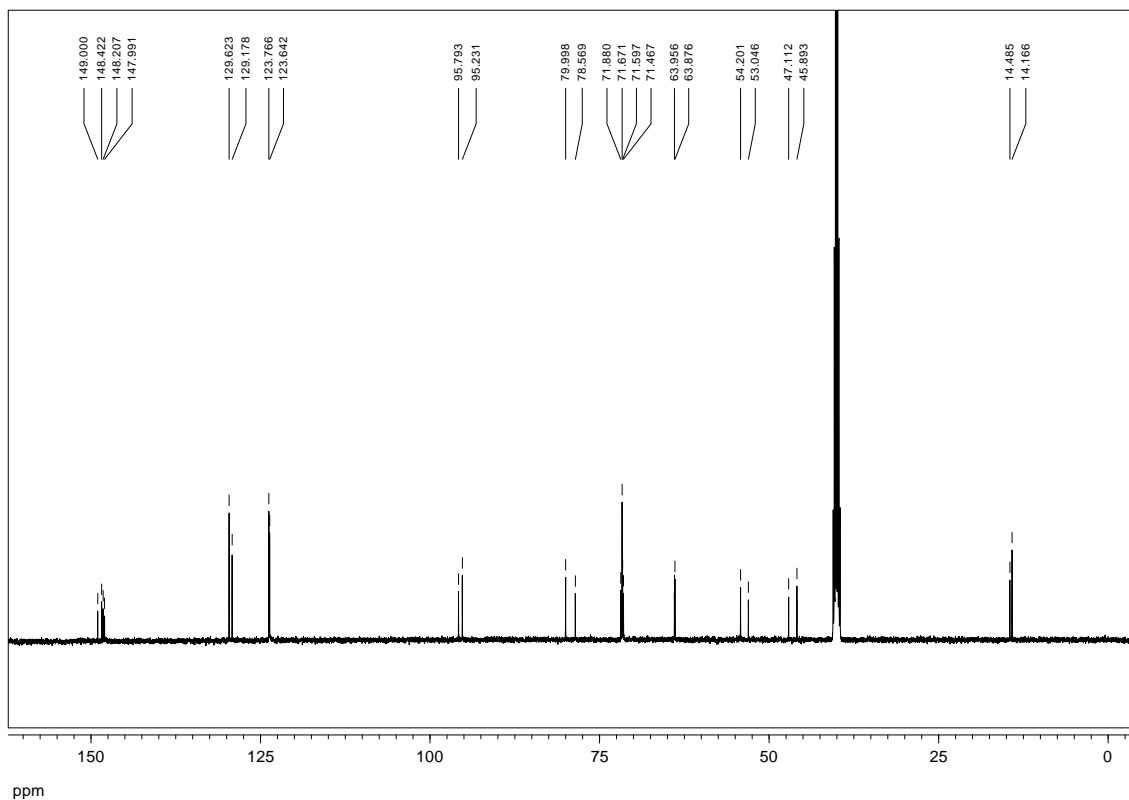

Figure S53.  $^{13}\text{C}$  NMR spectrum of 21a and 21b.

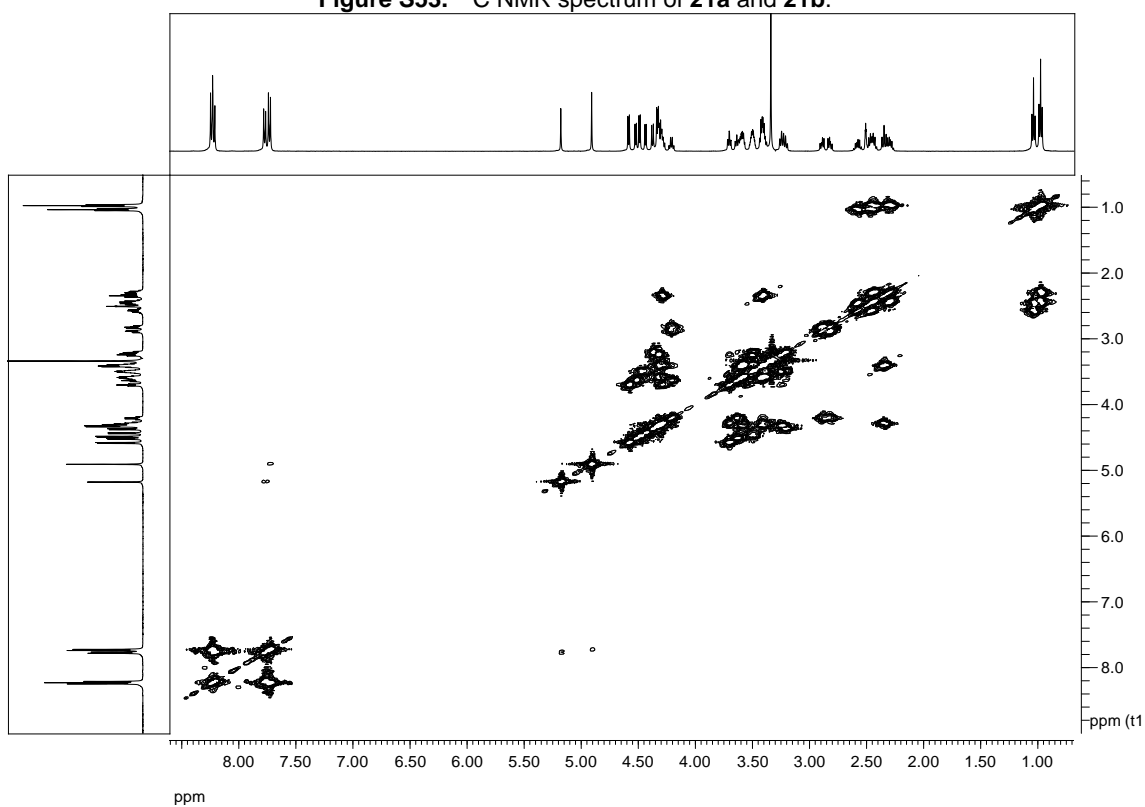

Figure S54.  $^1\text{H}$ - $^1\text{H}$  COSY spectrum of 21a and 21b.

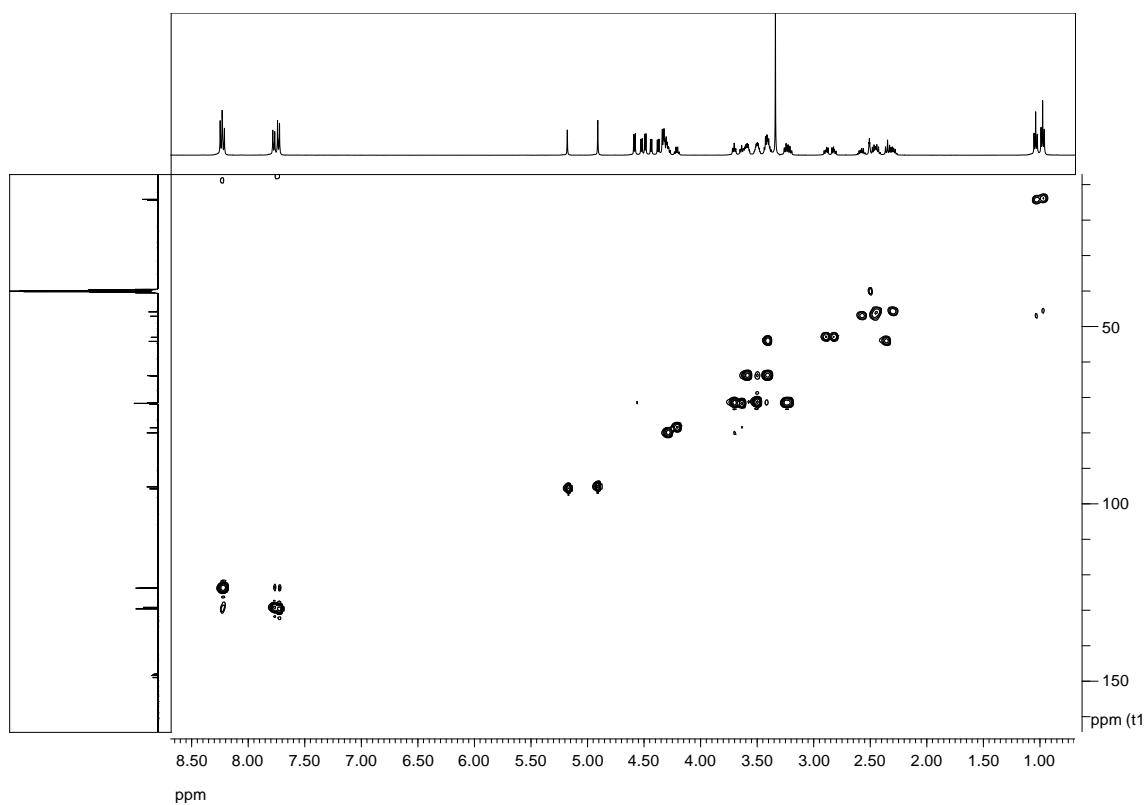

Figure S55. HMBC spectrum of 21a and 21b.

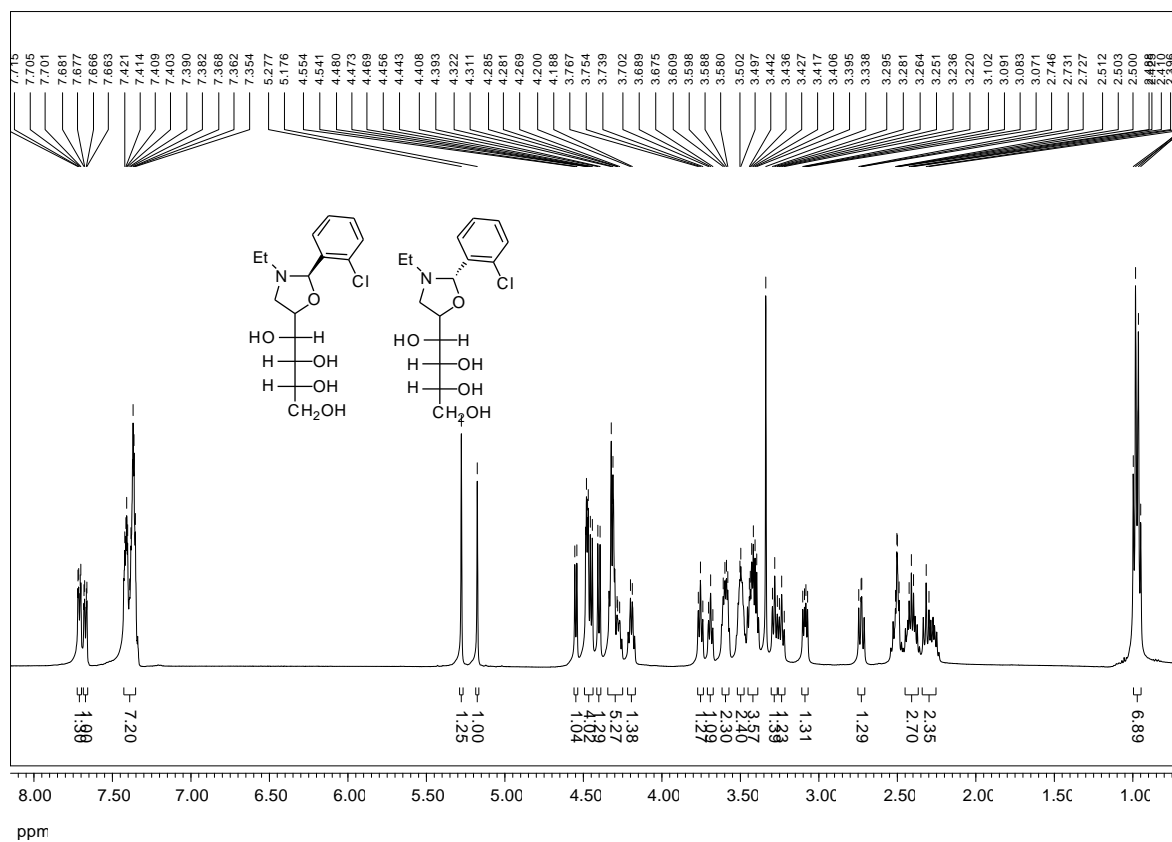

Figure S56. <sup>1</sup>H NMR spectrum of 22a and 22b.

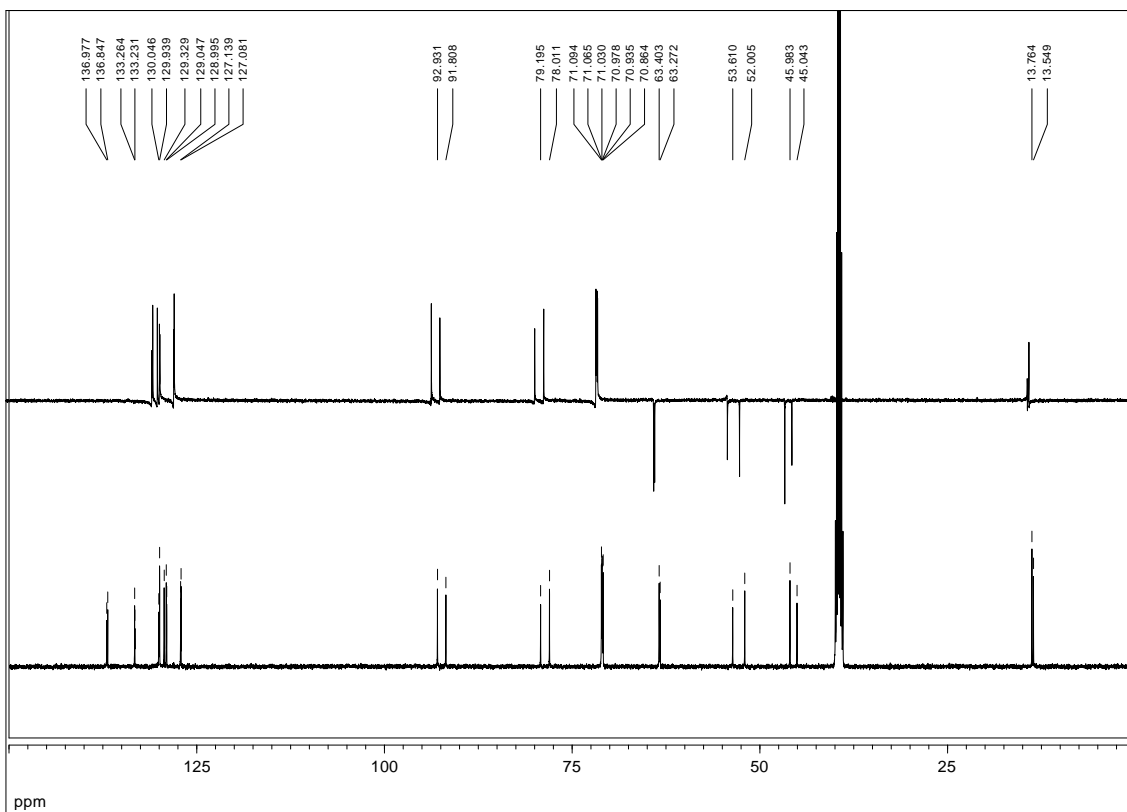

Figure S57.  $^{13}\text{C}$  NMR and DEPT spectra of **22a** and **22b**.

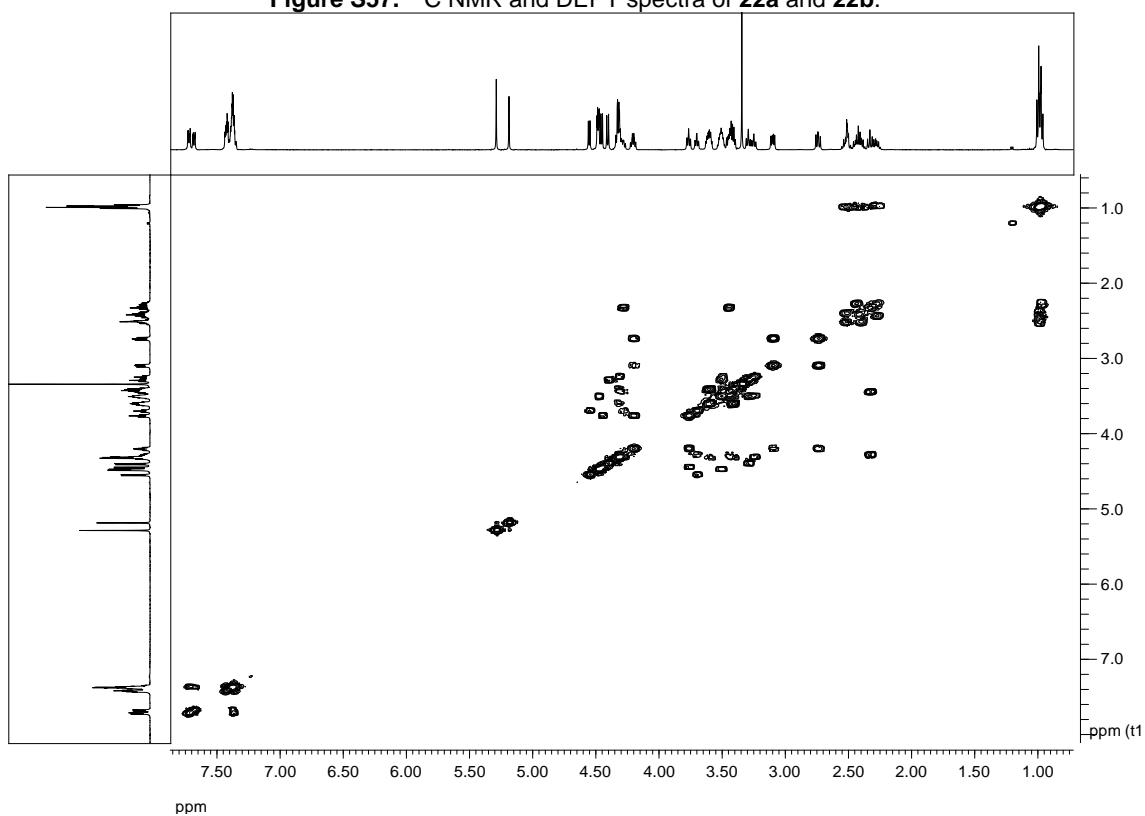

Figure S58.  $^1\text{H}$ - $^1\text{H}$  COSY spectrum of **22a** and **22b**.

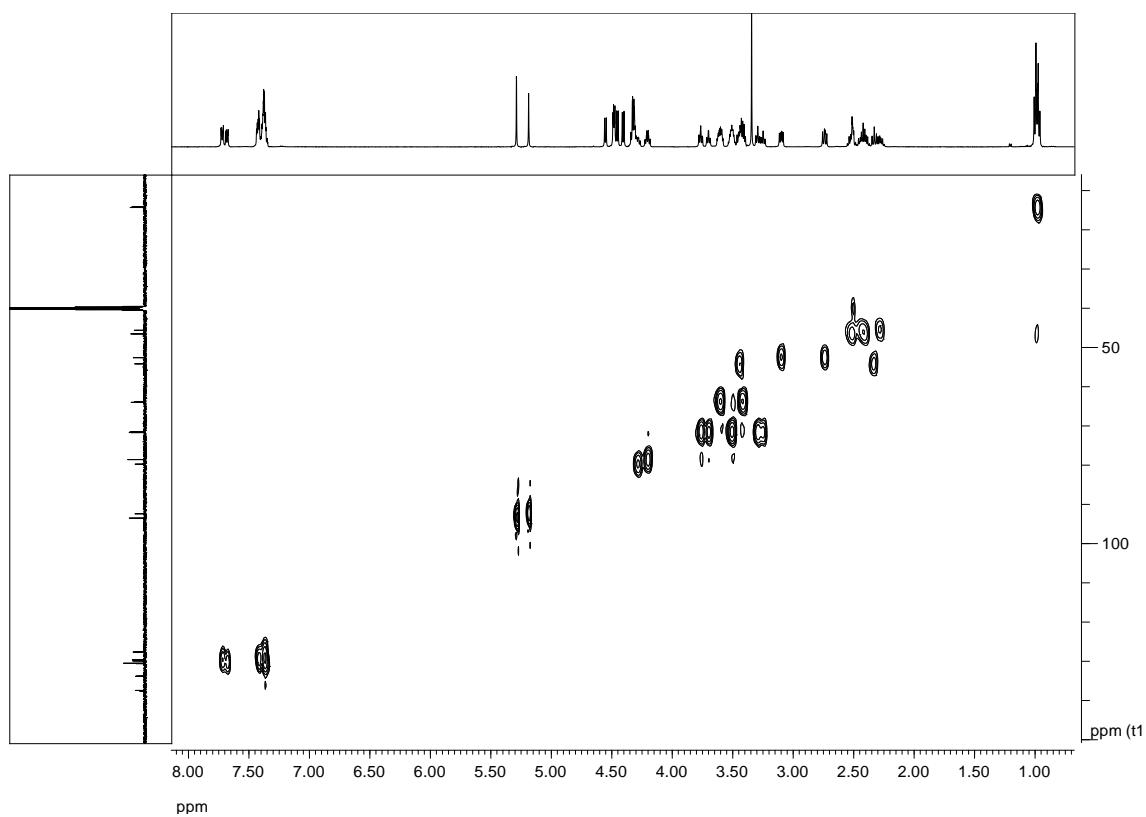

Figure S59. HMBC spectrum of 22a and 22b.

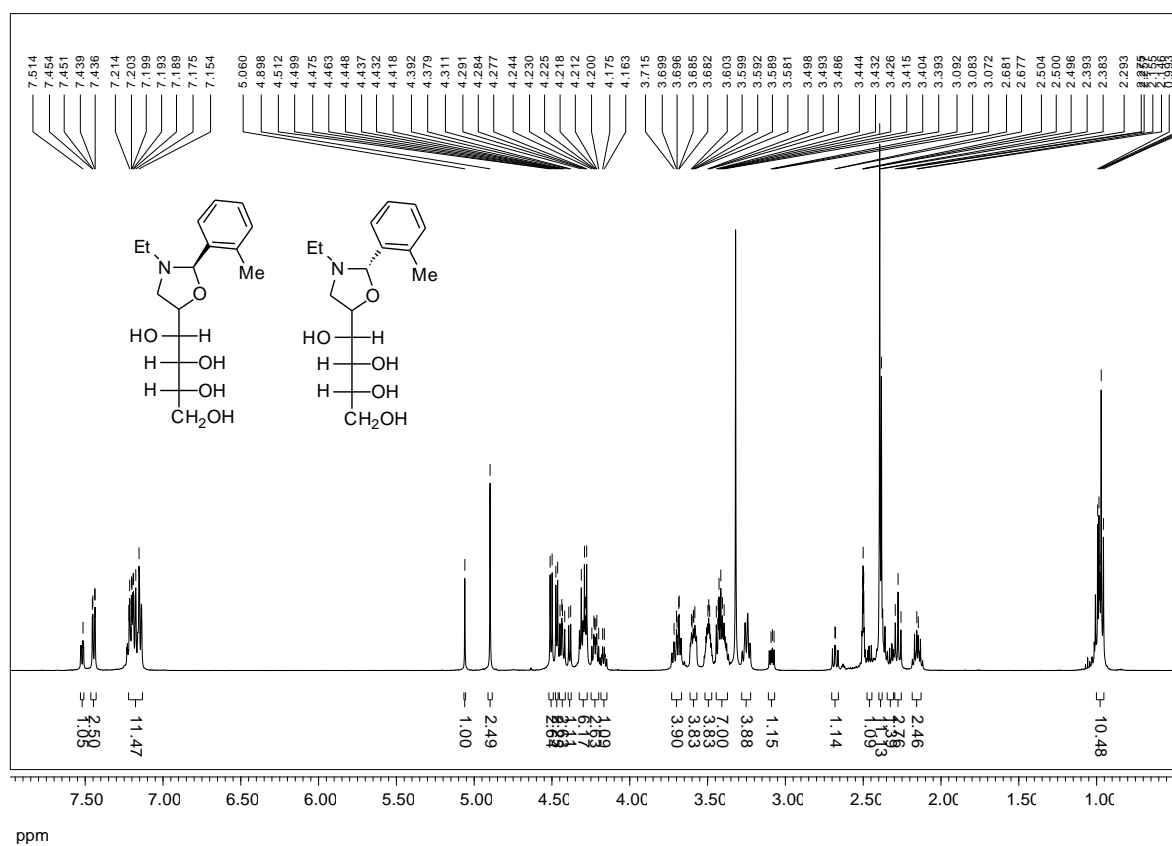

Figure S60. <sup>1</sup>H NMR spectrum of 23a and 23b.

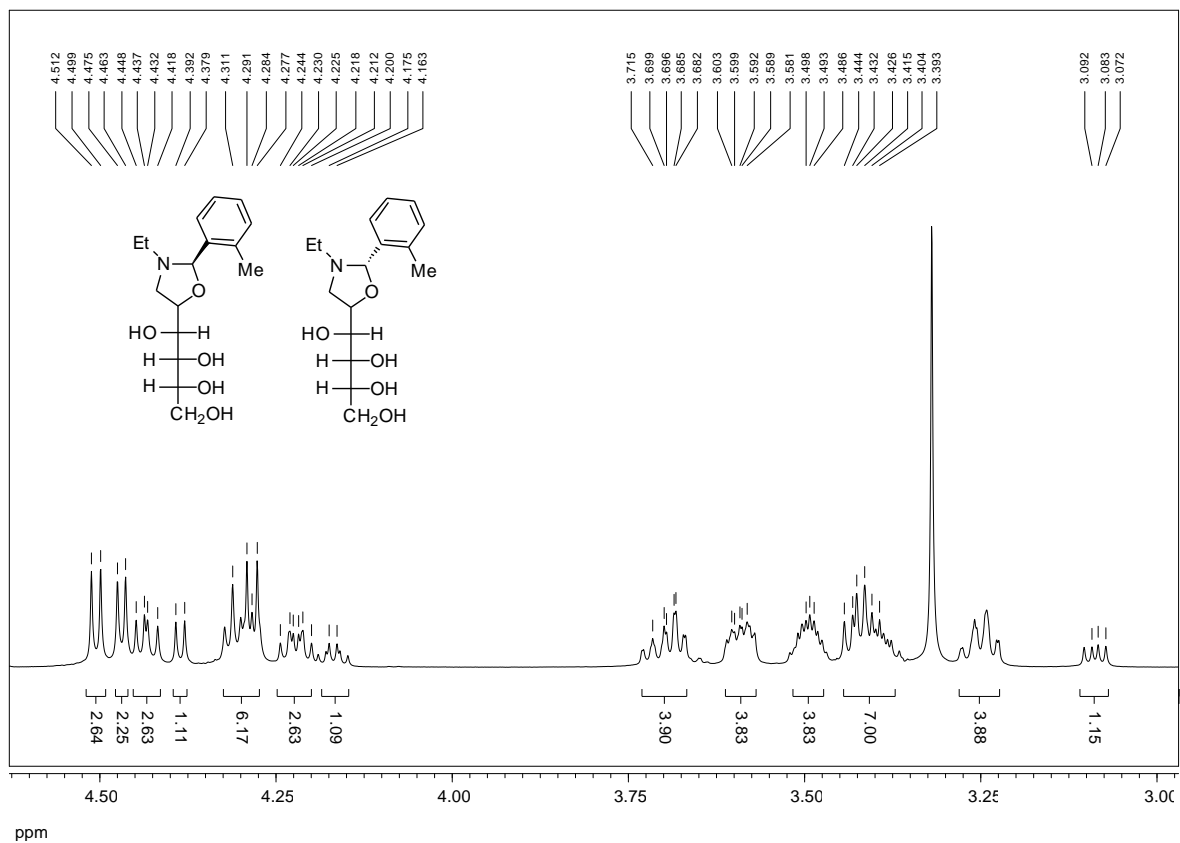

Figure S61. <sup>1</sup>H NMR spectrum of 23a and 23b.

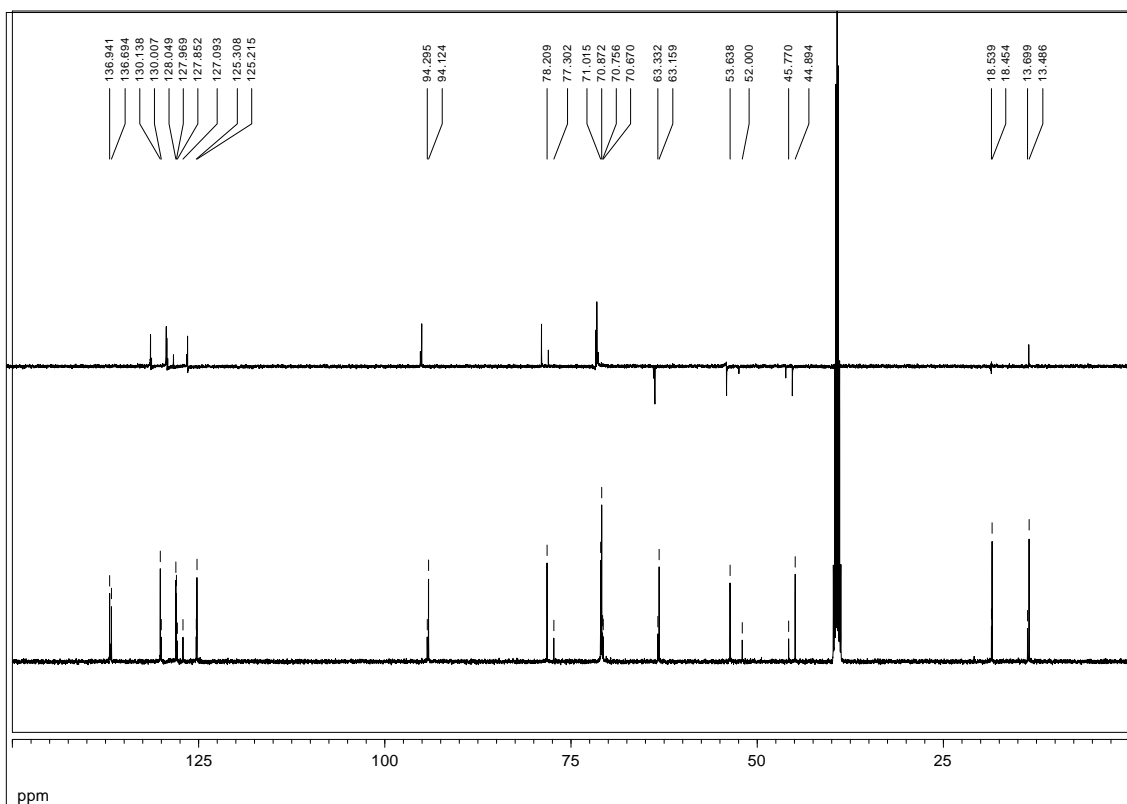

Figure S62. <sup>13</sup>C NMR and DEPT spectra of 23a and 23b.



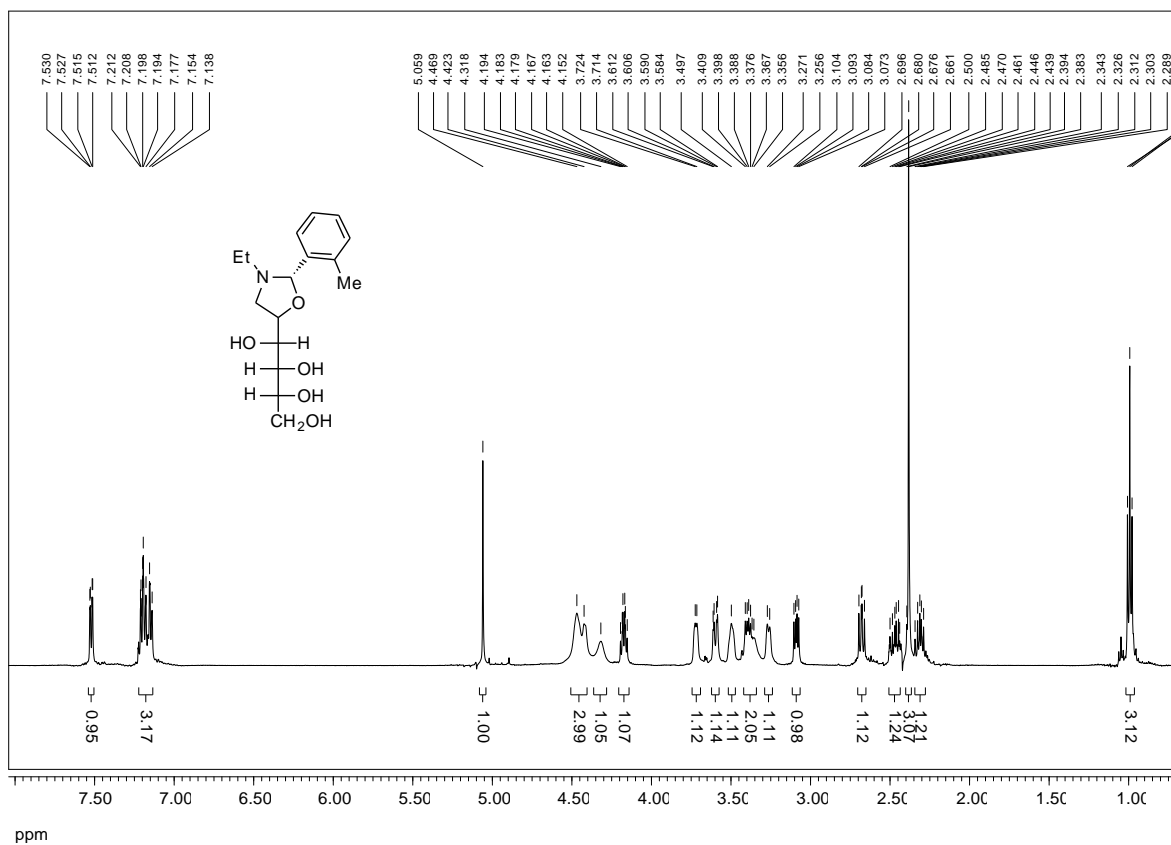

Figure S63. <sup>1</sup>H NMR spectrum of 23b.

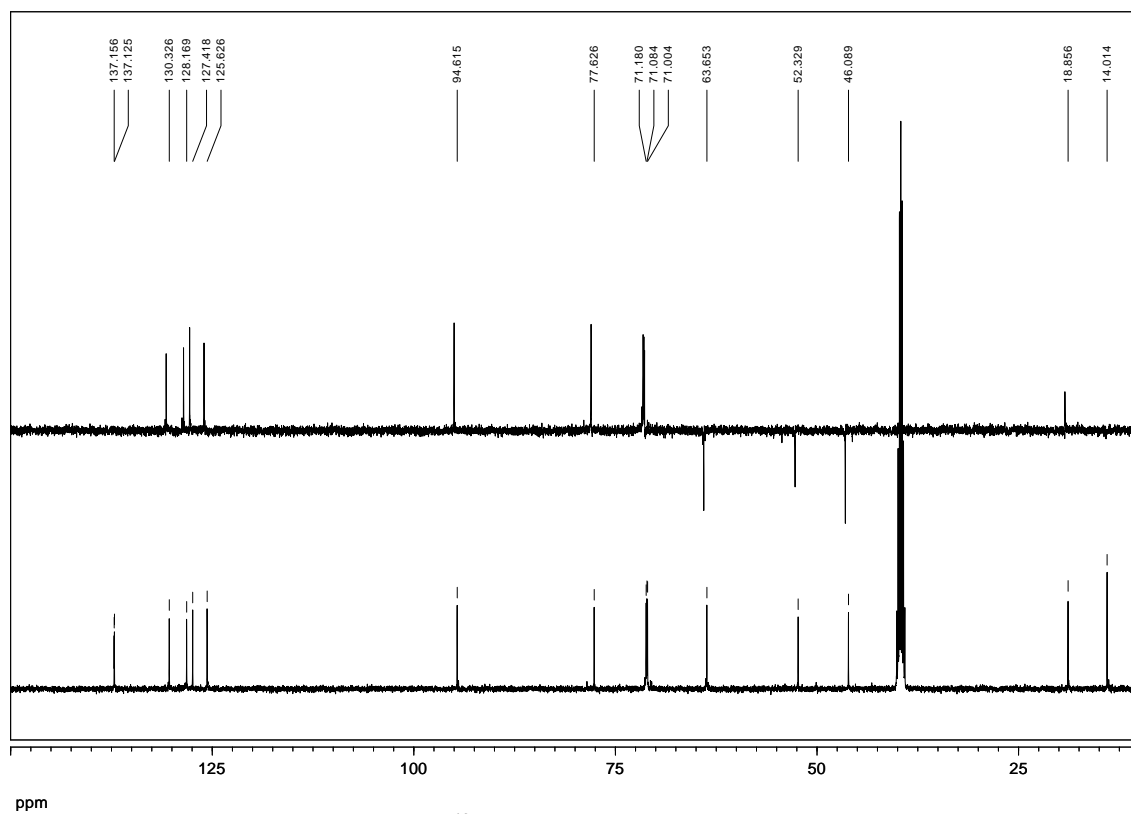

Figure S64. <sup>13</sup>C NMR and DEPT spectra of 23b.

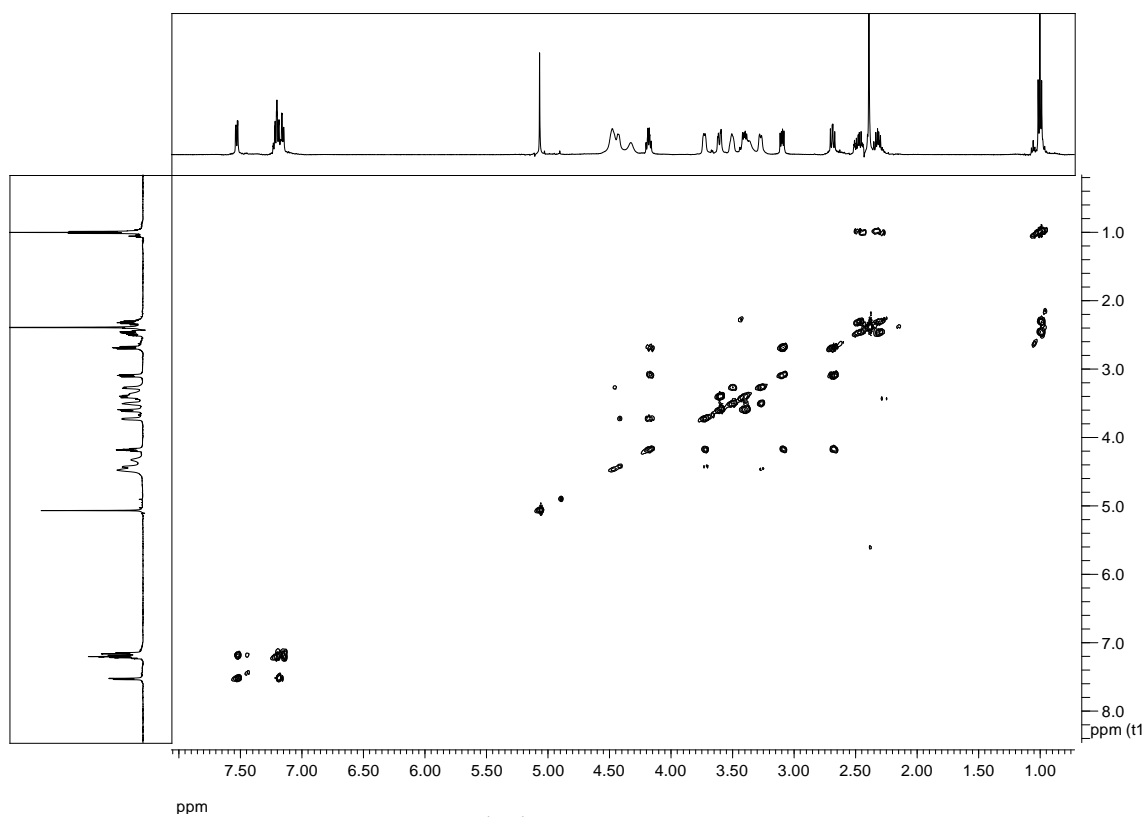

**Figure S65.**  $^1\text{H}$ - $^1\text{H}$  COSY spectrum of **23b**.

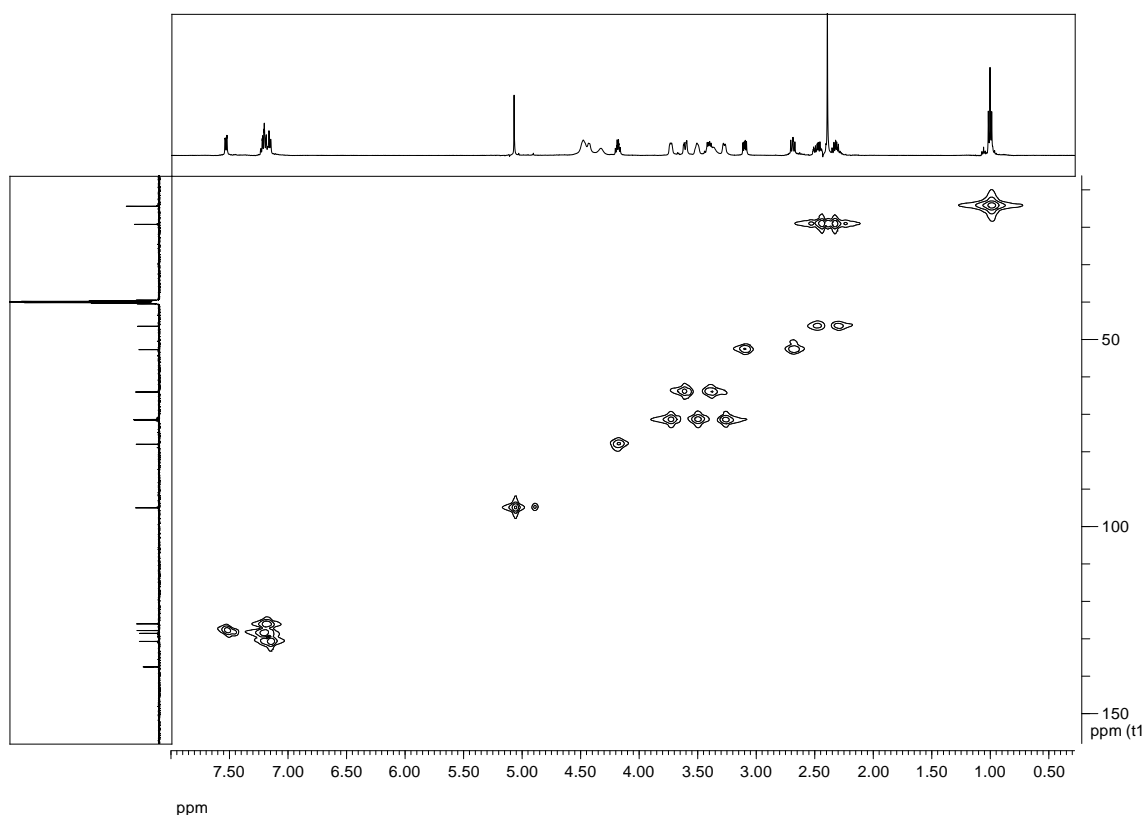

**Figure S66.** HMQC spectrum of **23b**.

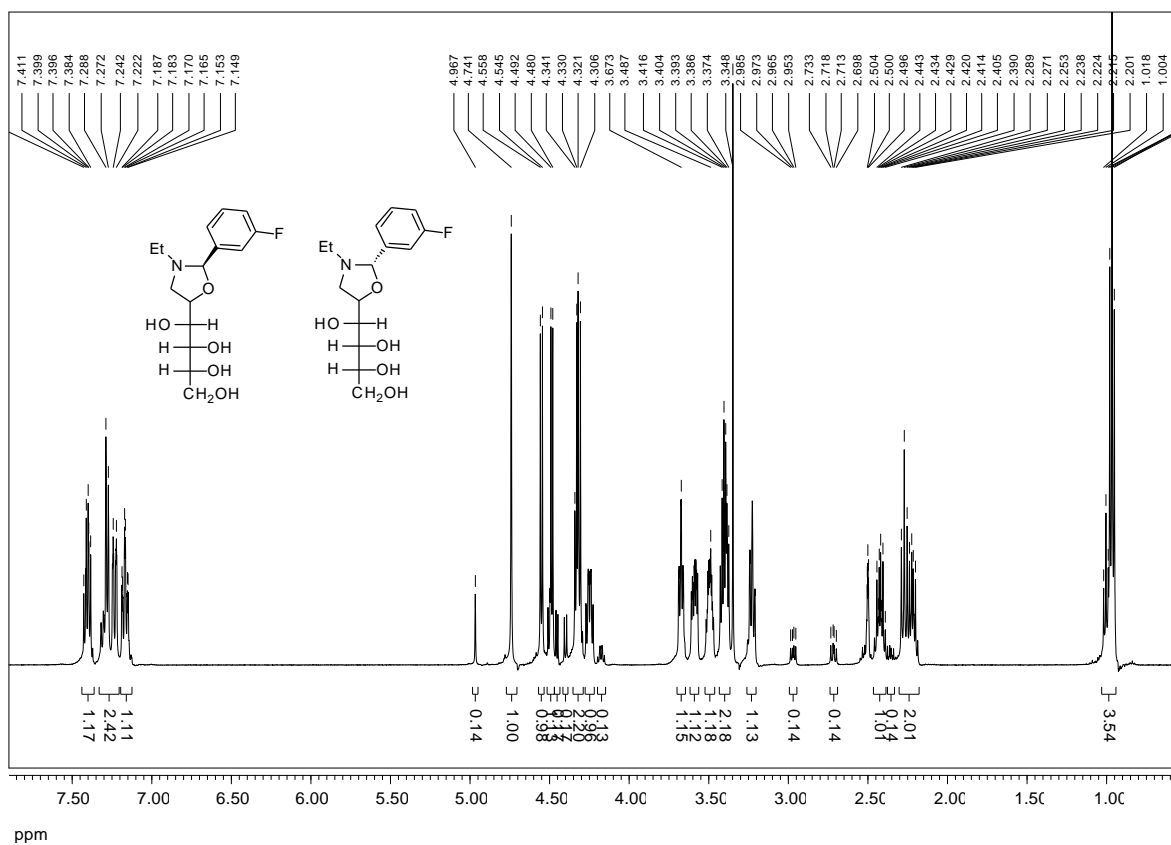

Figure S67. <sup>1</sup>H NMR spectrum of 24a and 24b.

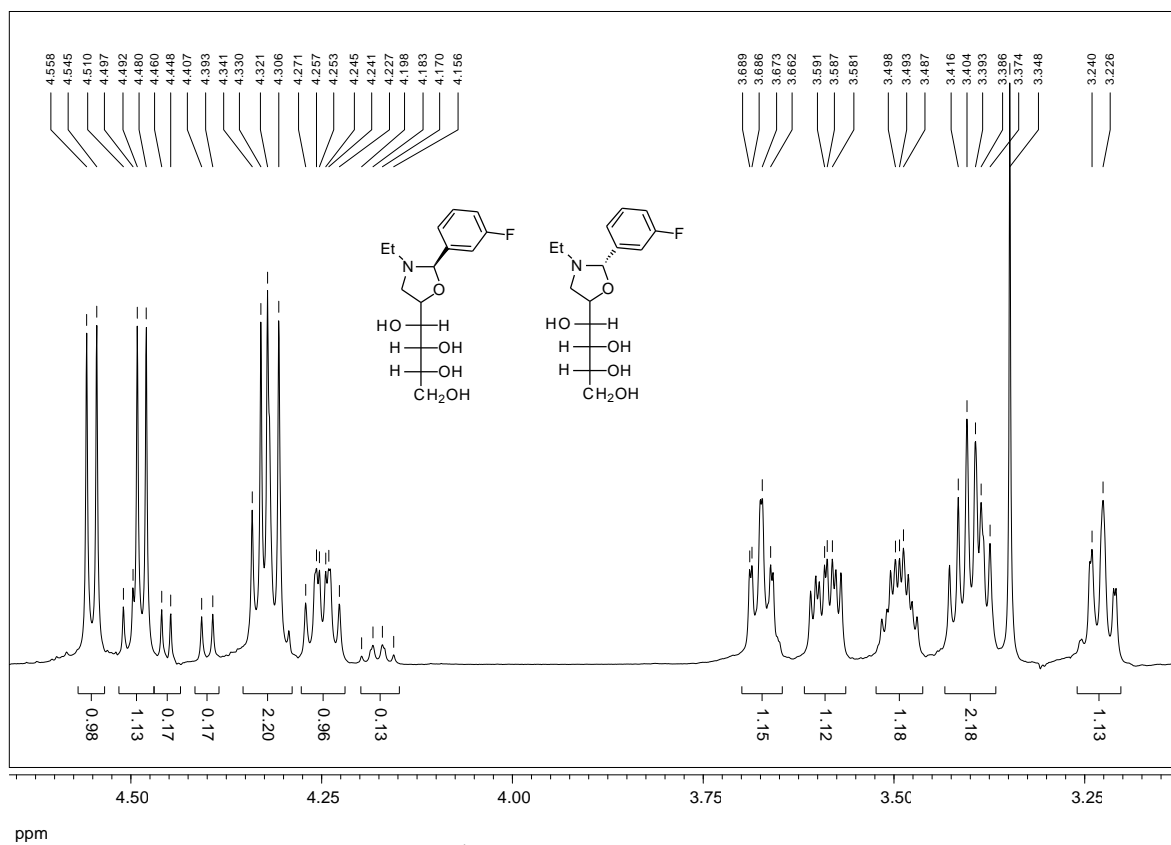

Figure S68. <sup>1</sup>H NMR spectrum of 24a and 24b.

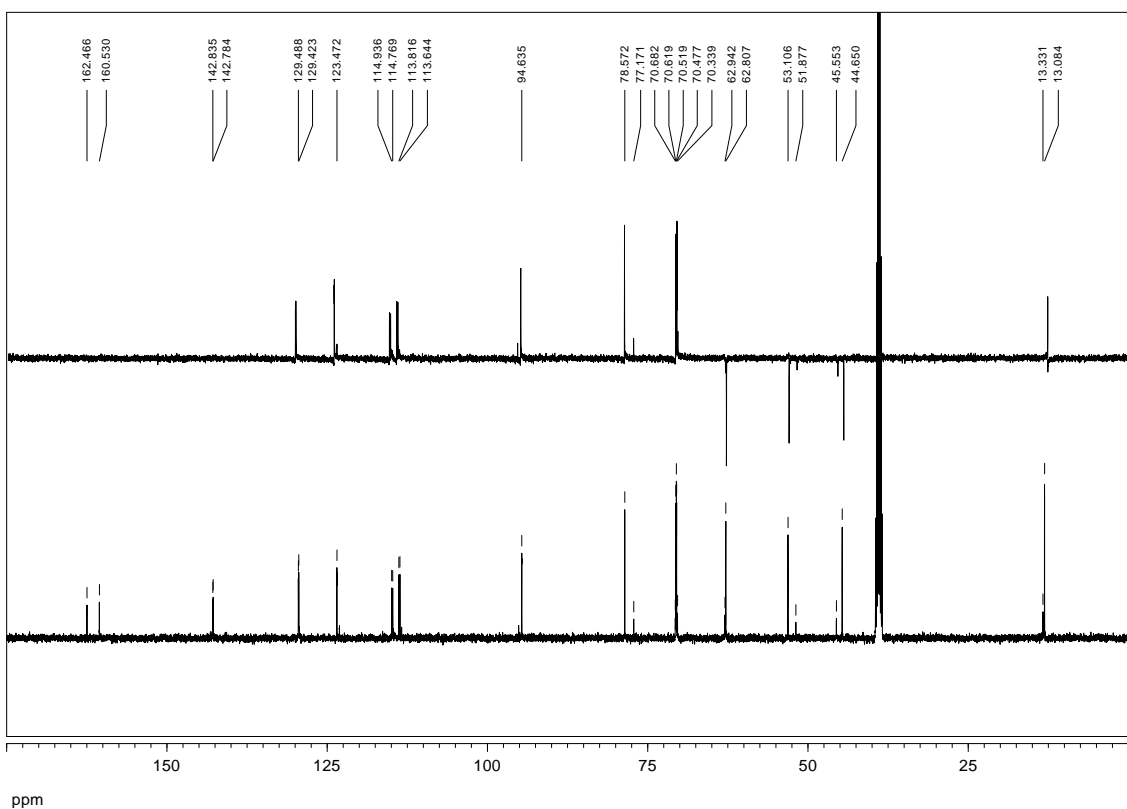

Figure S69.  $^{13}\text{C}$  NMR and DEPT spectra of **24a** and **24b**.

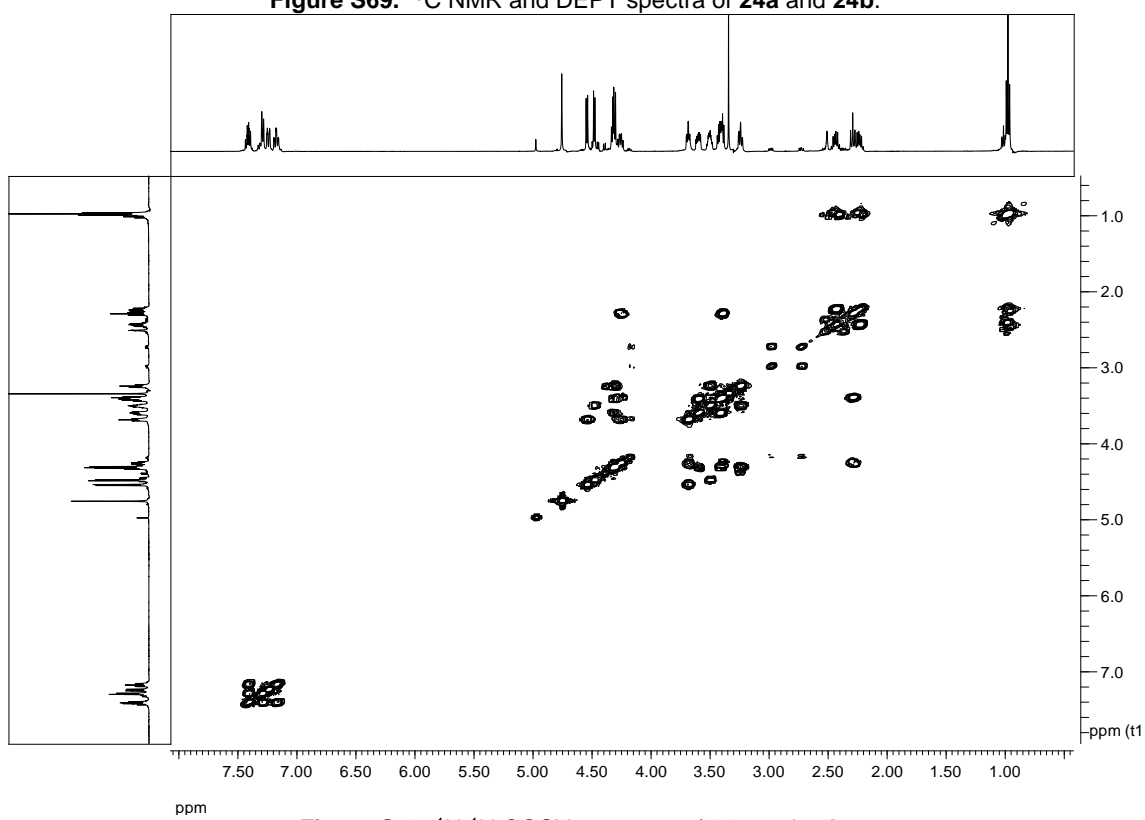

Figure S70.  $^1\text{H}$ - $^1\text{H}$  COSY spectrum of **24a** and **24b**.

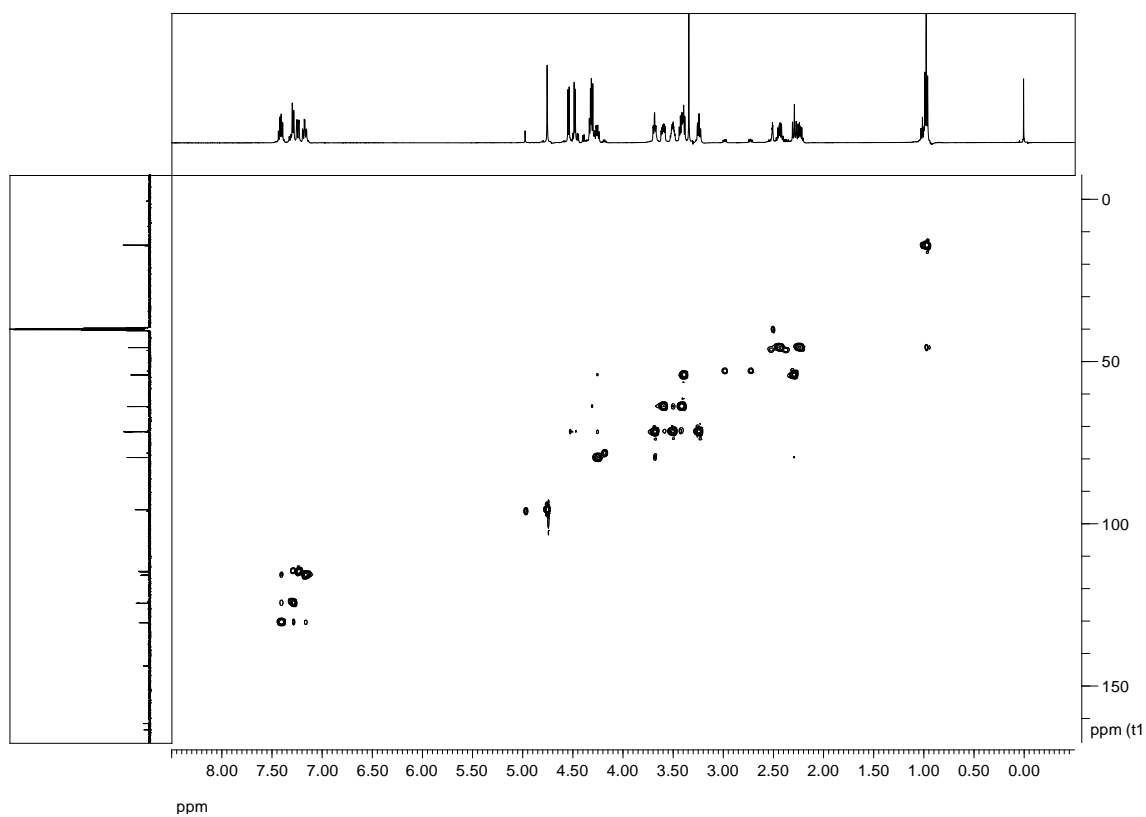

Figure S71. HMBC spectrum of 24a and 24b.

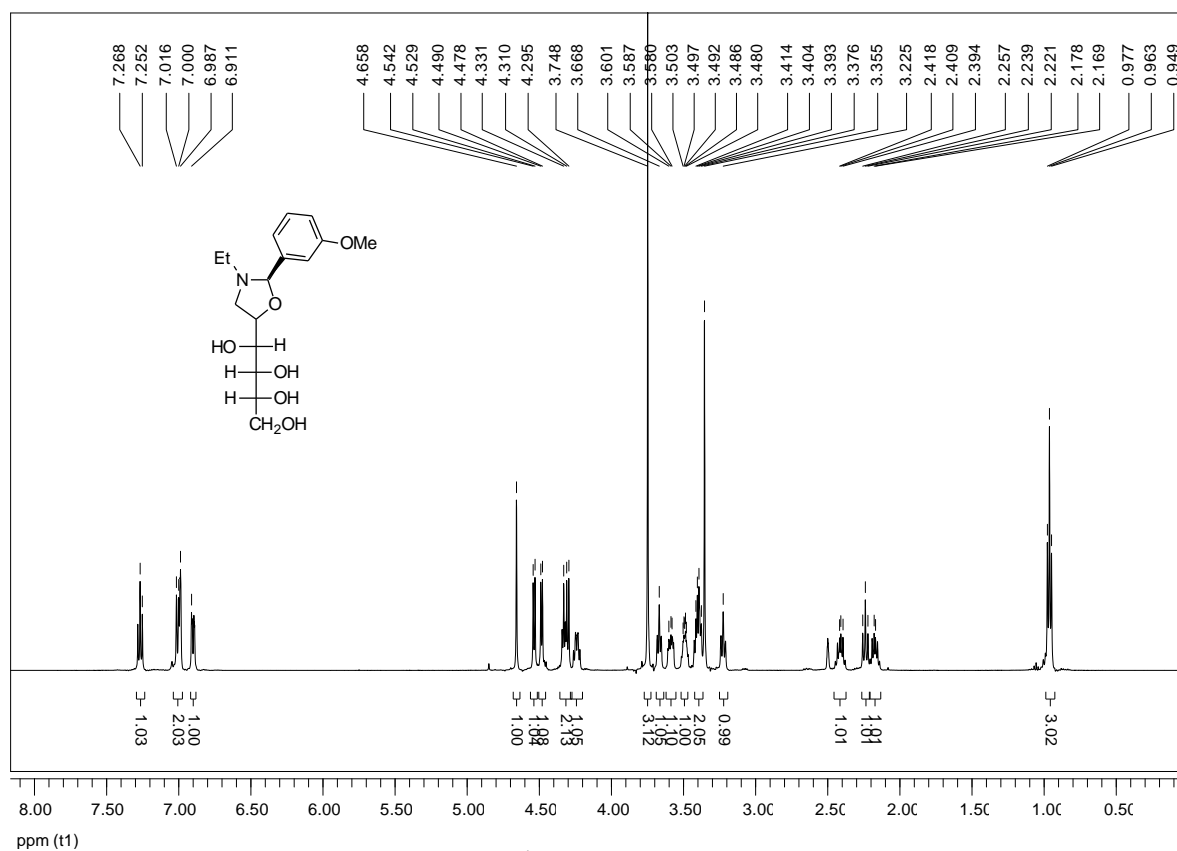

Figure S72. <sup>1</sup>H NMR spectrum of 25a.

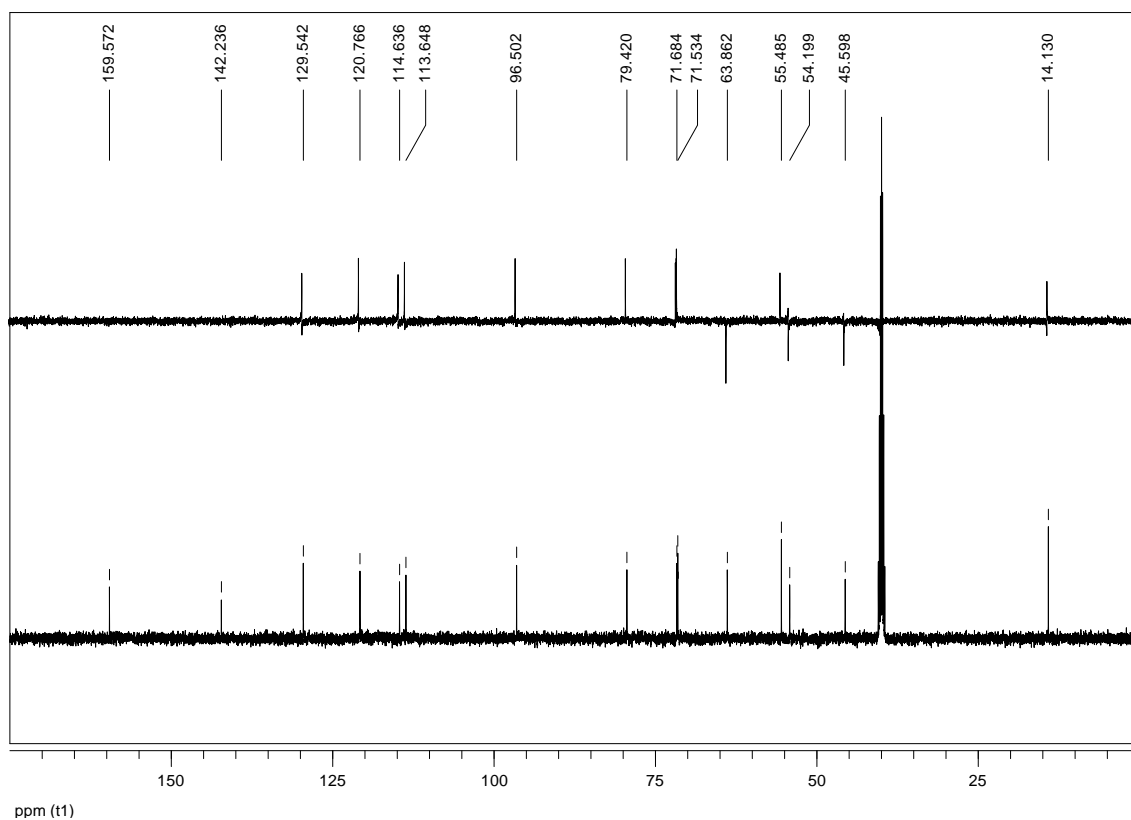

Figure S73. <sup>13</sup>C NMR and DEPT spectra of 25a.

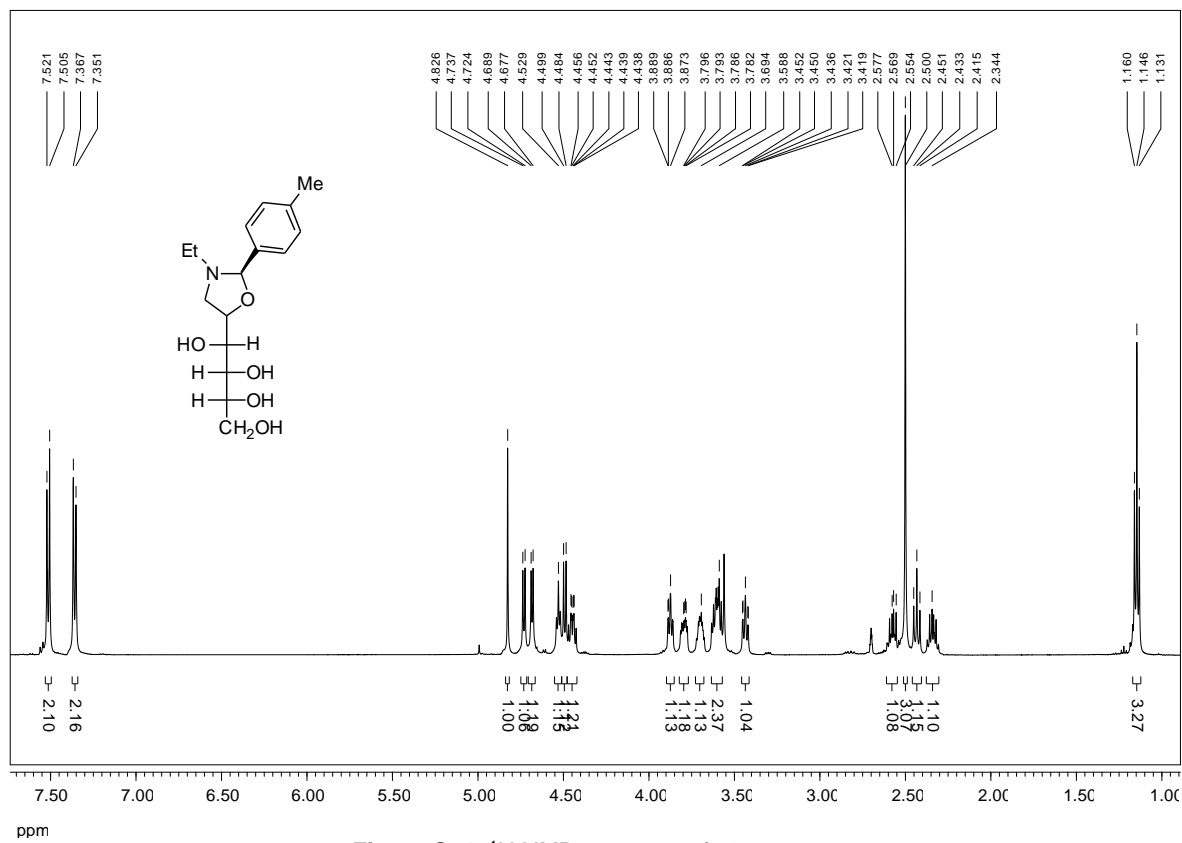

Figure S74. <sup>1</sup>H NMR spectrum of 26a.

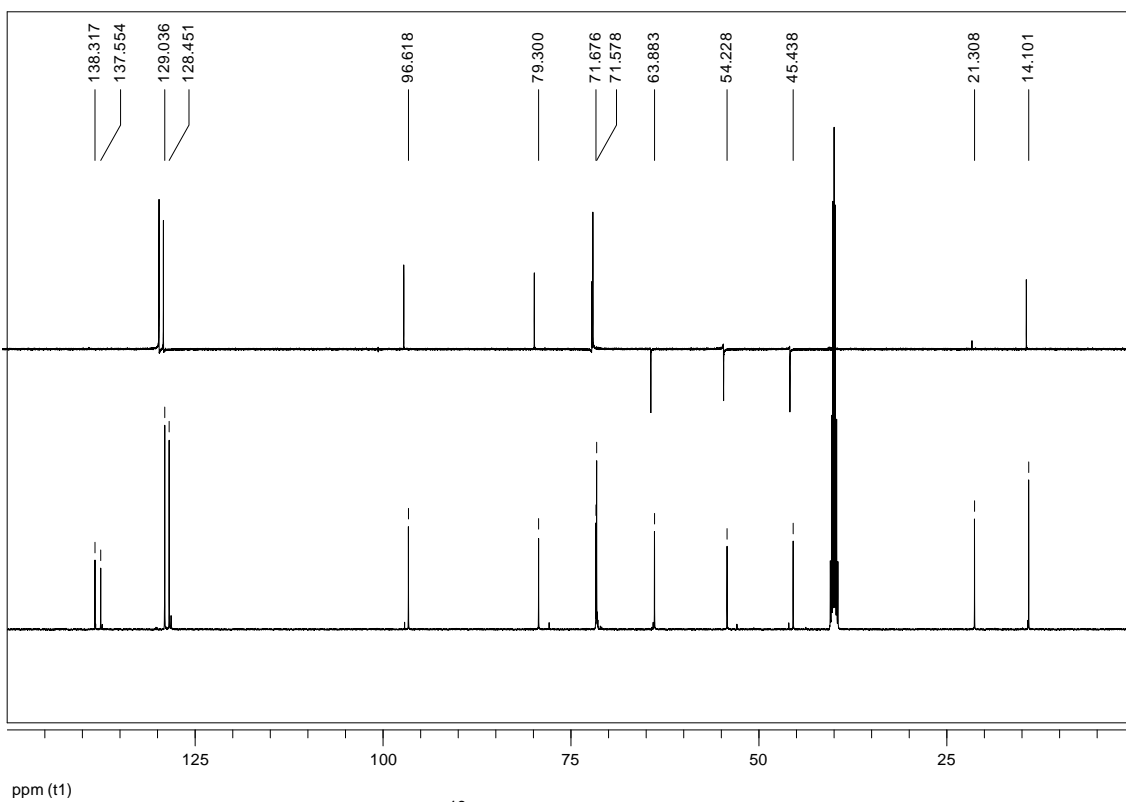

Figure S75.  $^{13}\text{C}$  NMR and DEPT spectra of **26a**.

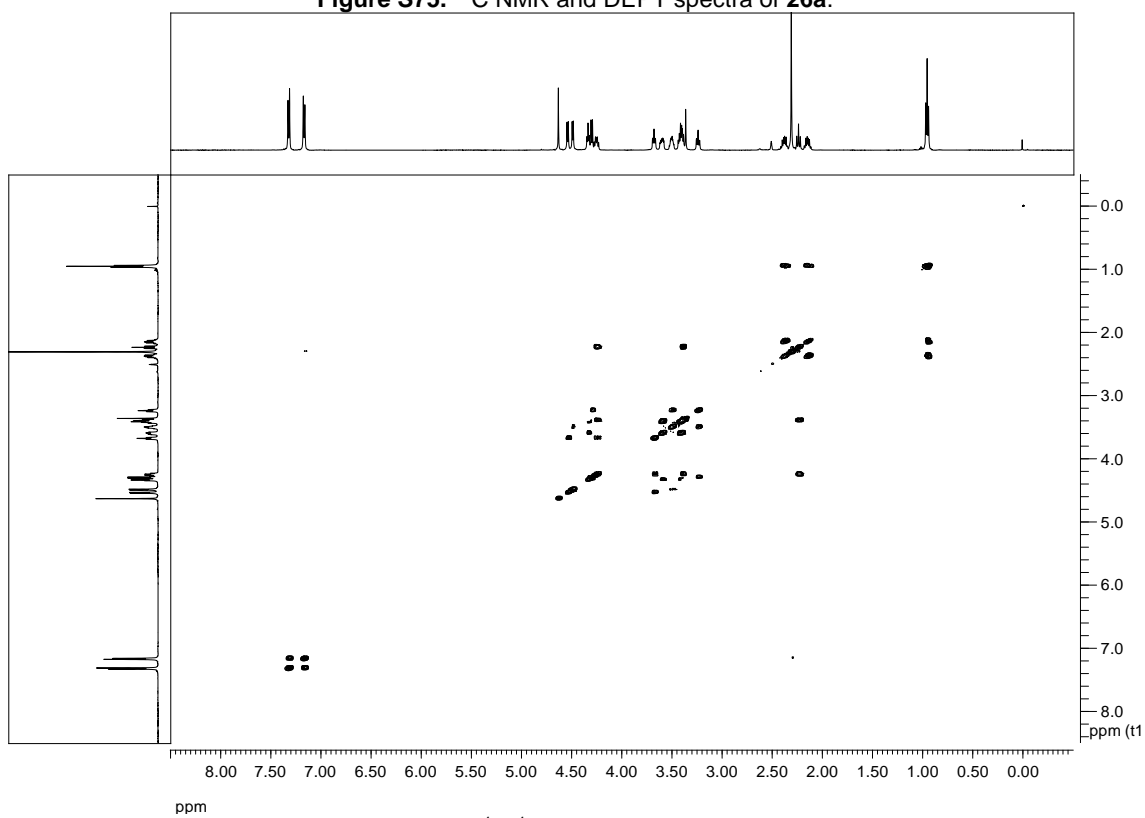

Figure S76.  $^1\text{H}$ - $^1\text{H}$  COSY spectrum of **26a**.

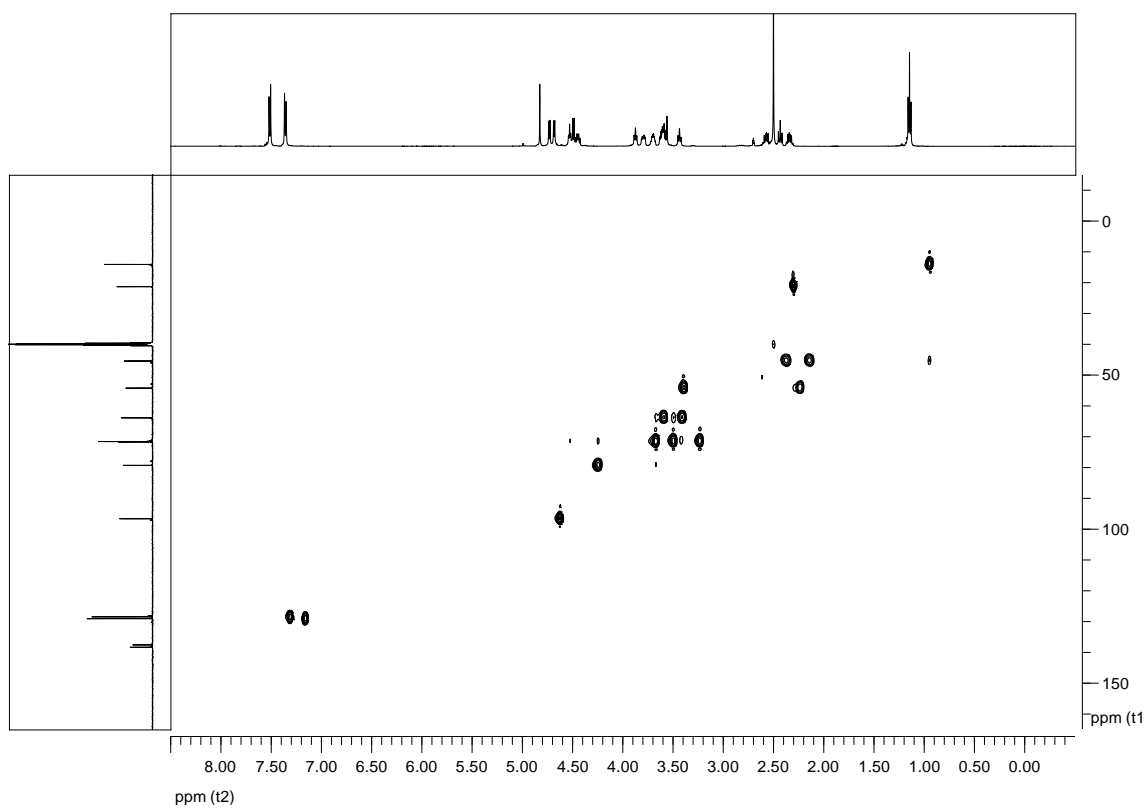

Figure S77. HMQC spectrum of 26a.

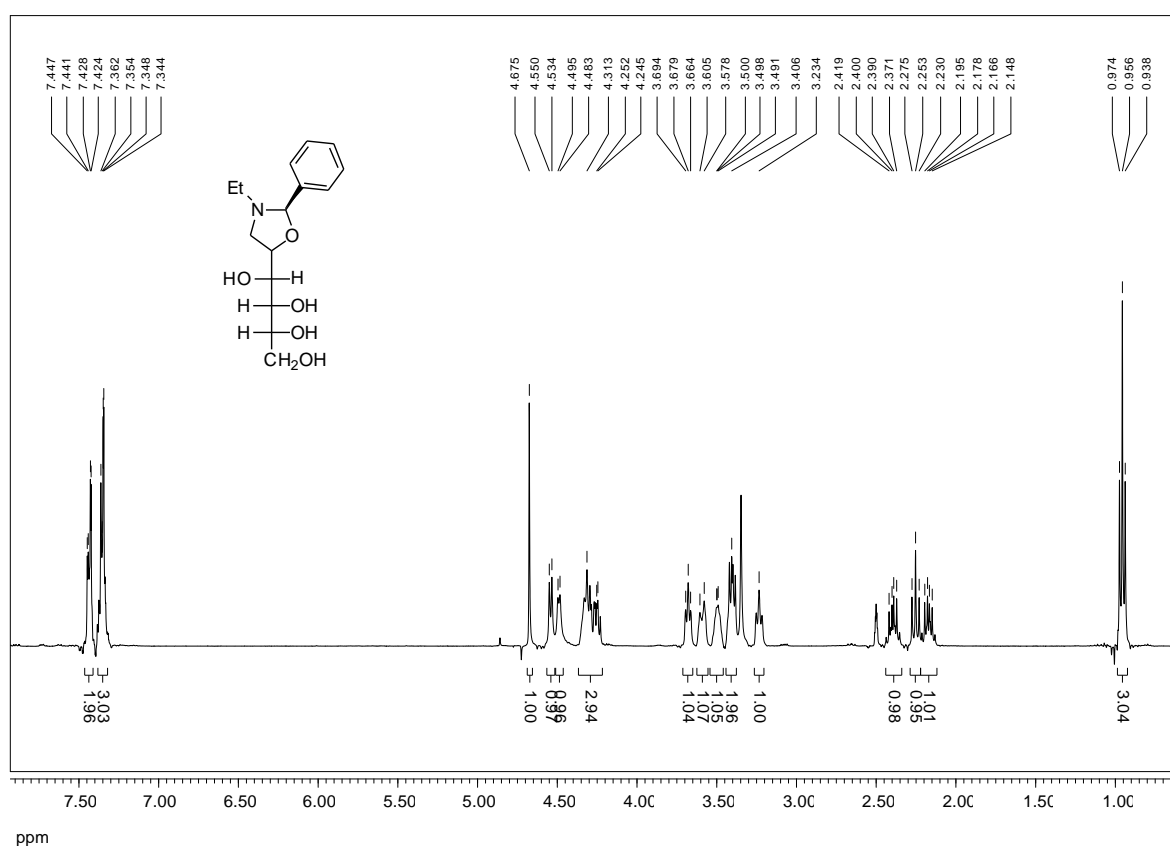

Figure S78. <sup>1</sup>H NMR spectrum of 27a.



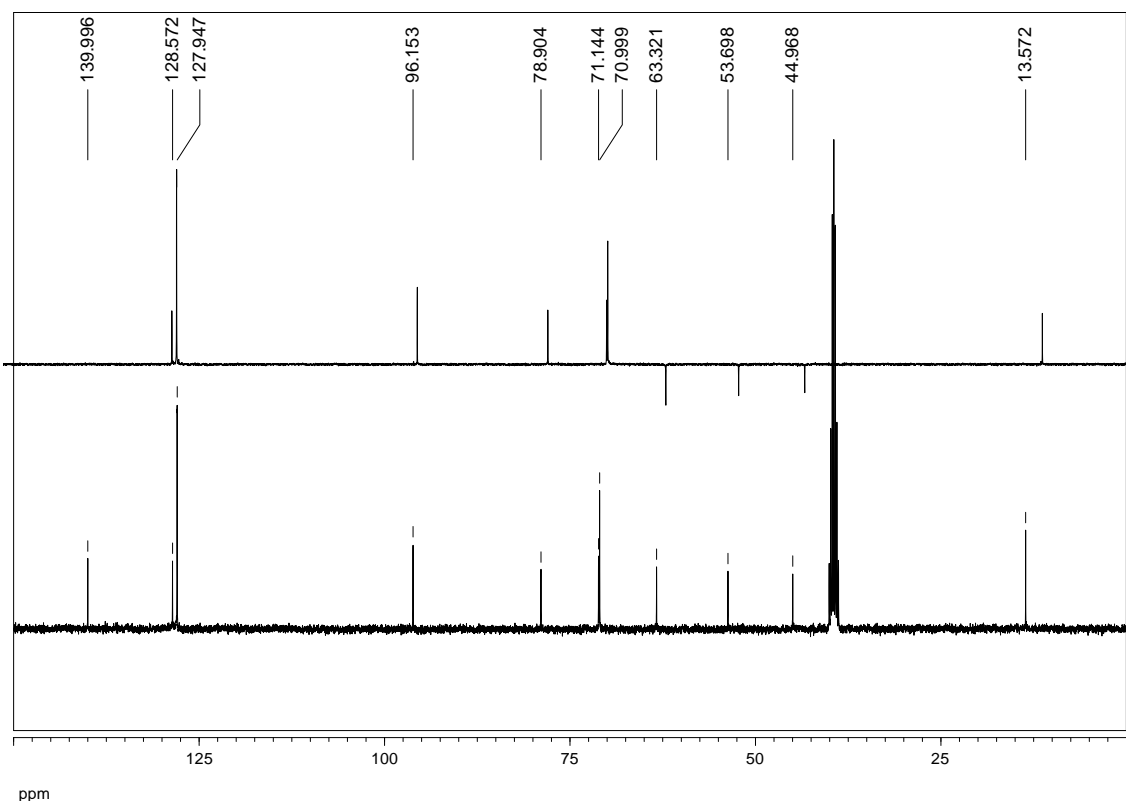

Figure S79.  $^{13}\text{C}$  NMR and DEPT spectra of **27a**.

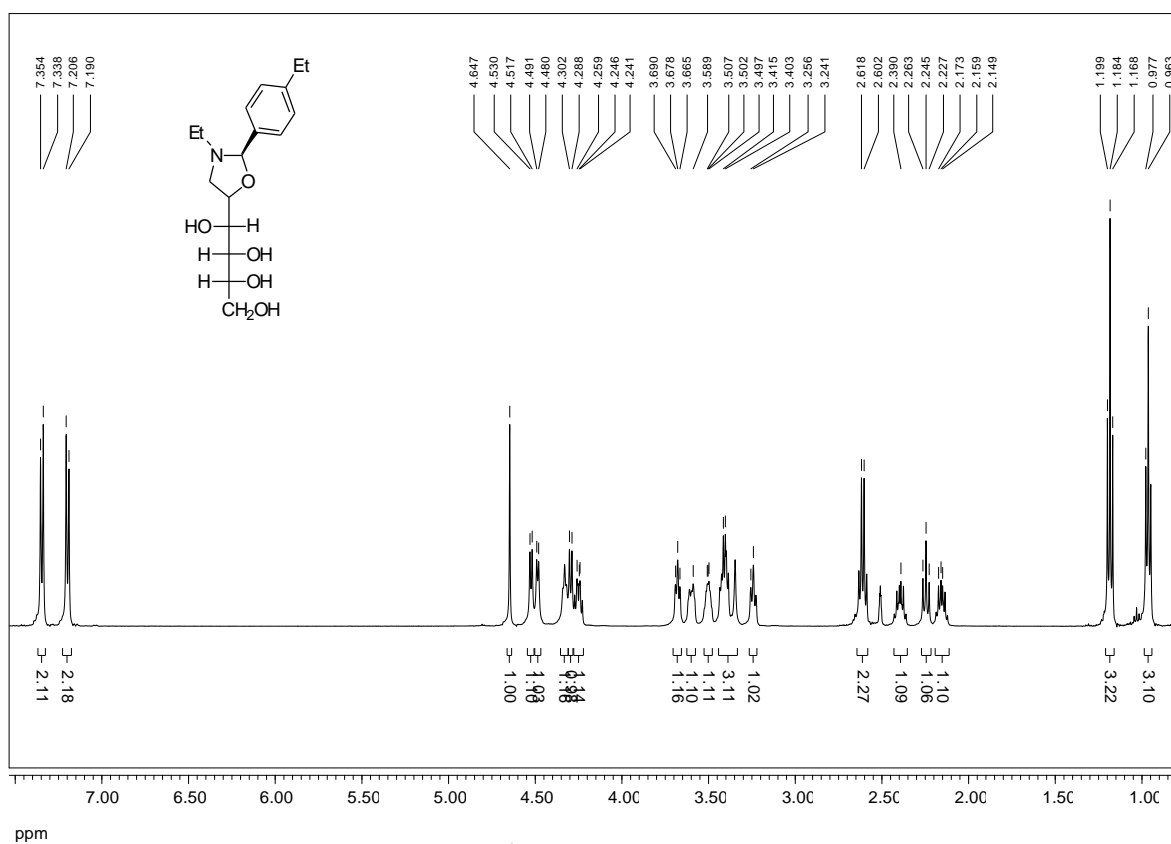

Figure S80.  $^1\text{H}$  NMR spectrum of **28a**.

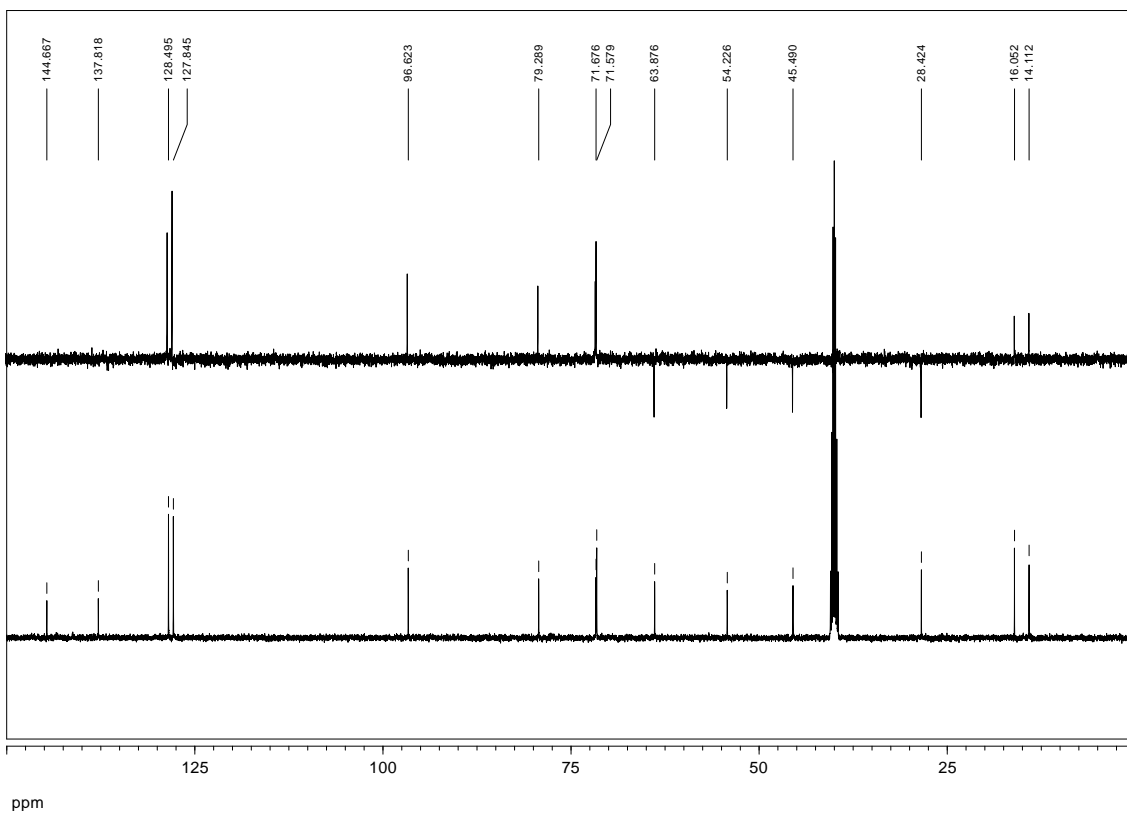

Figure S81.  $^{13}\text{C}$  NMR and DEPT spectra of **28a**.

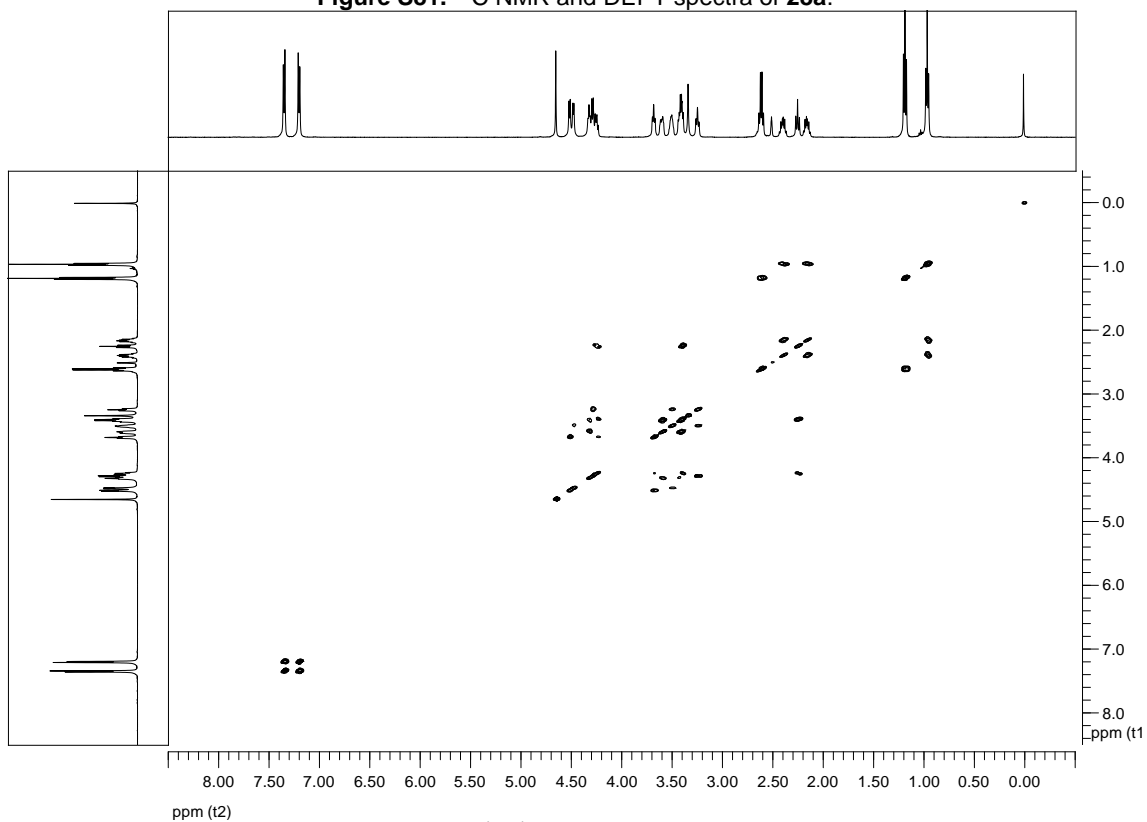

Figure S82.  $^1\text{H}$ - $^1\text{H}$  COSY spectrum of **28a**.

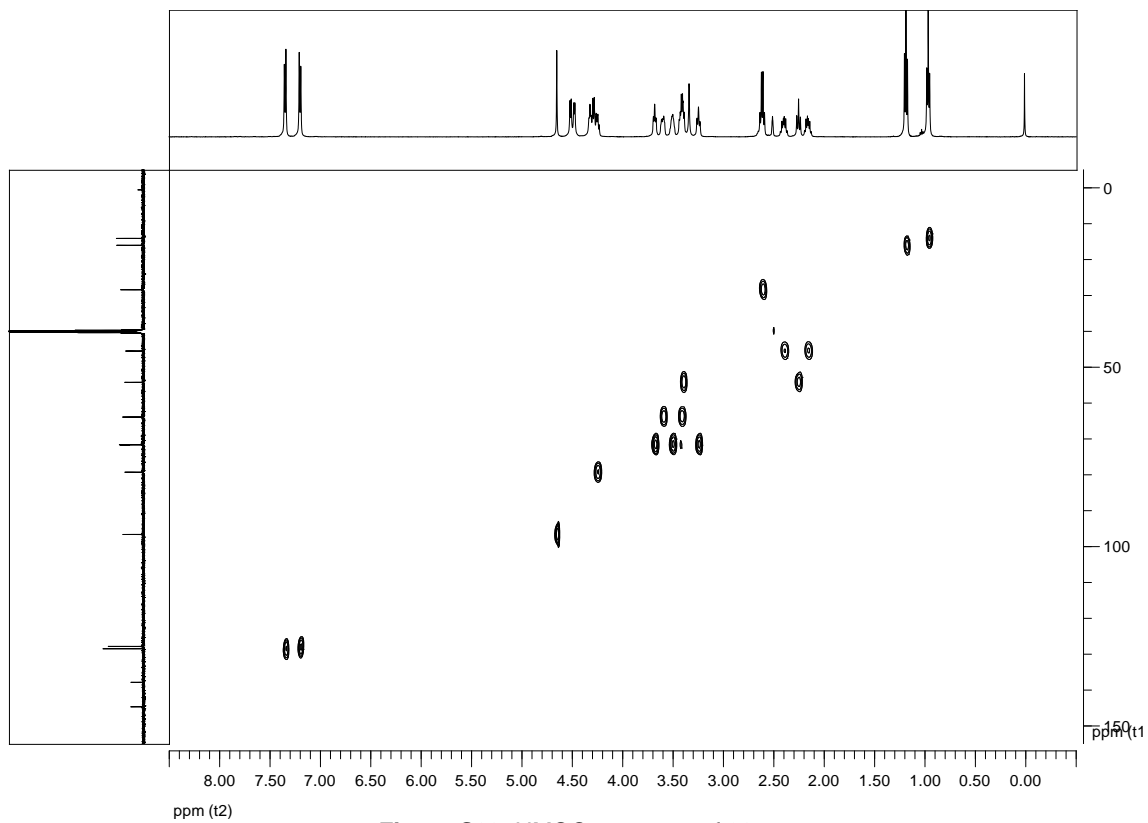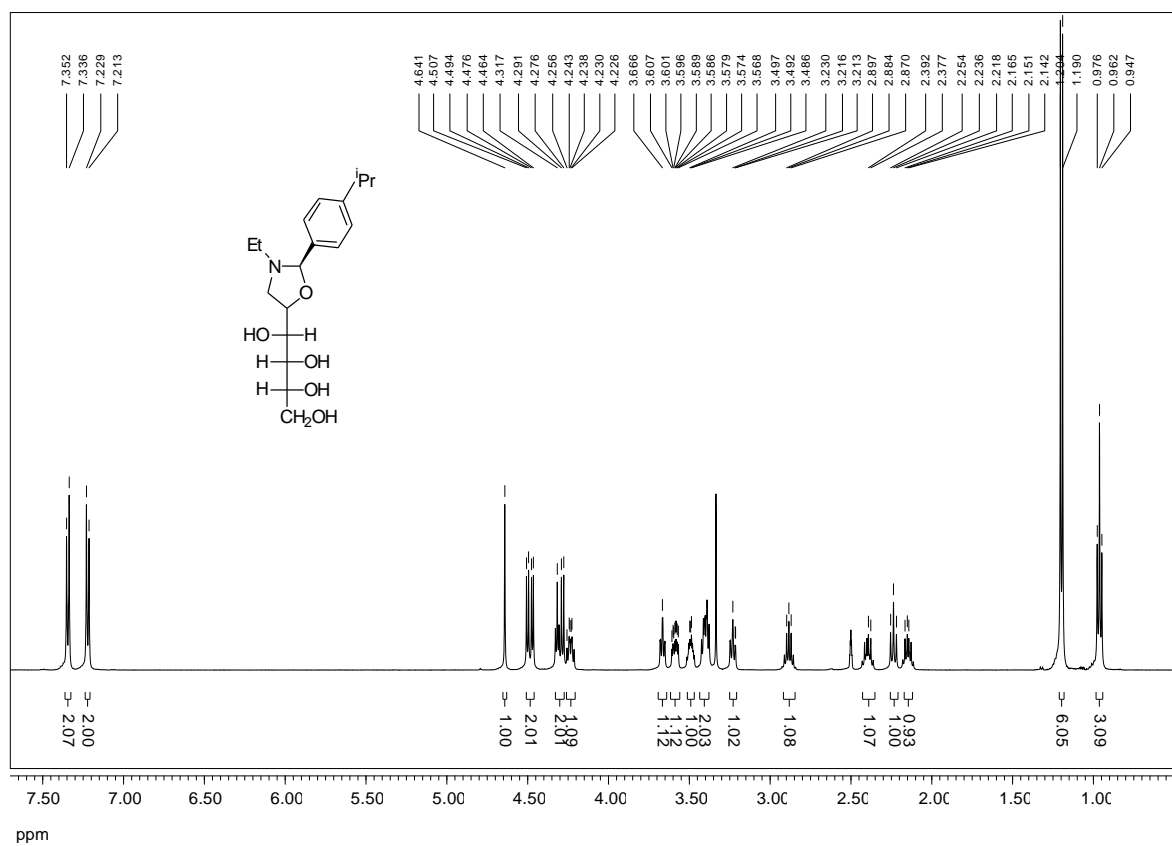

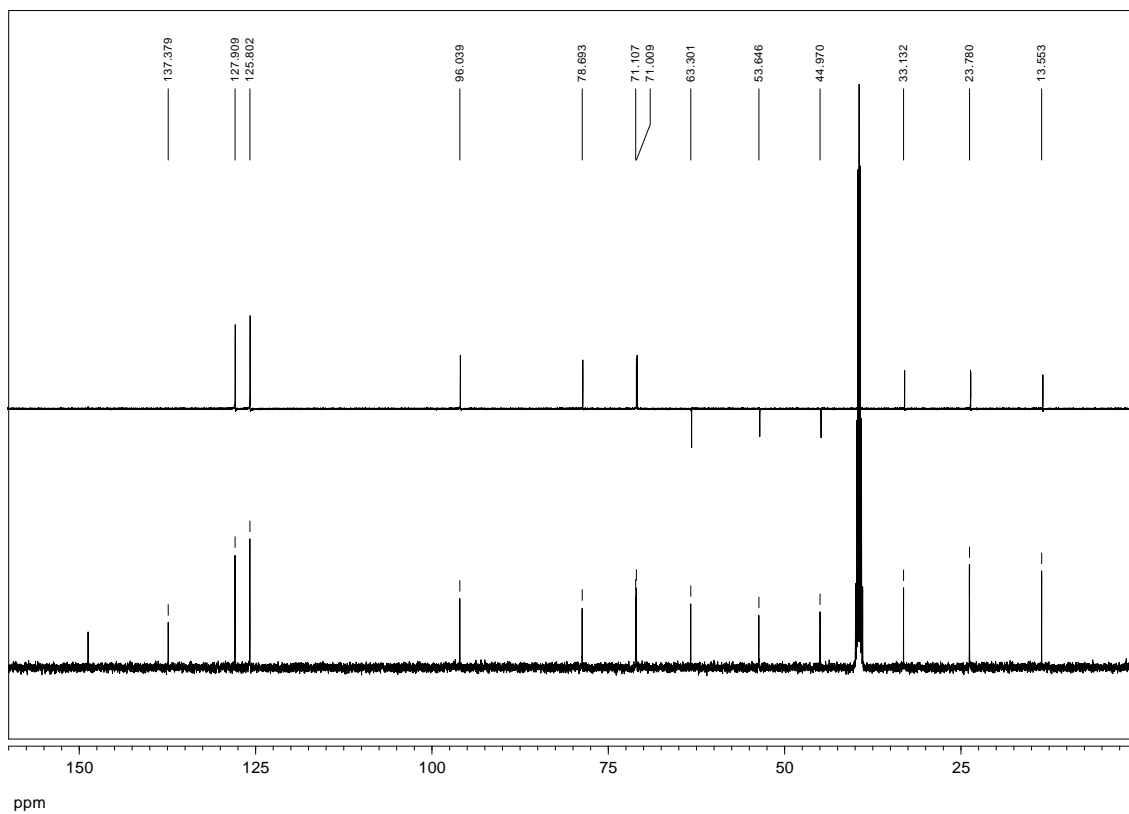

Figure S85.  $^{13}\text{C}$  NMR and DEPT spectra of **29a**.

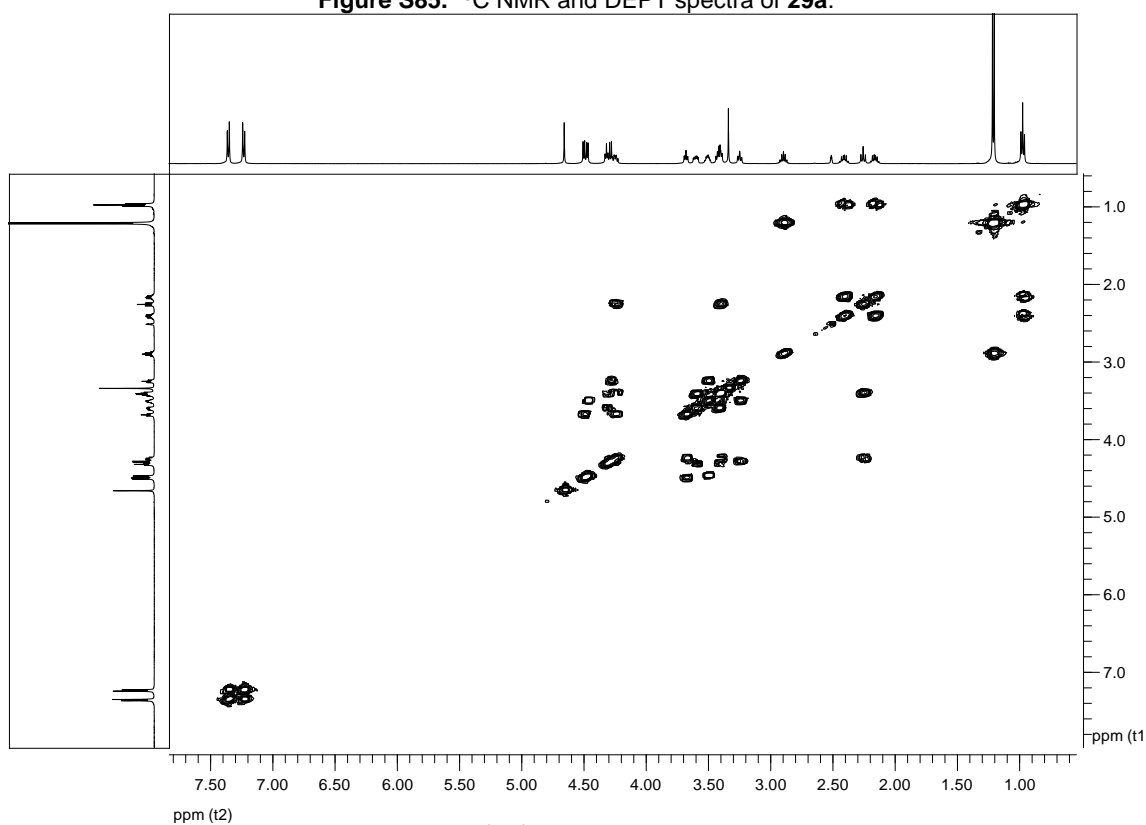

Figure S86.  $^1\text{H}$ - $^1\text{H}$  COSY spectrum of **29a**.

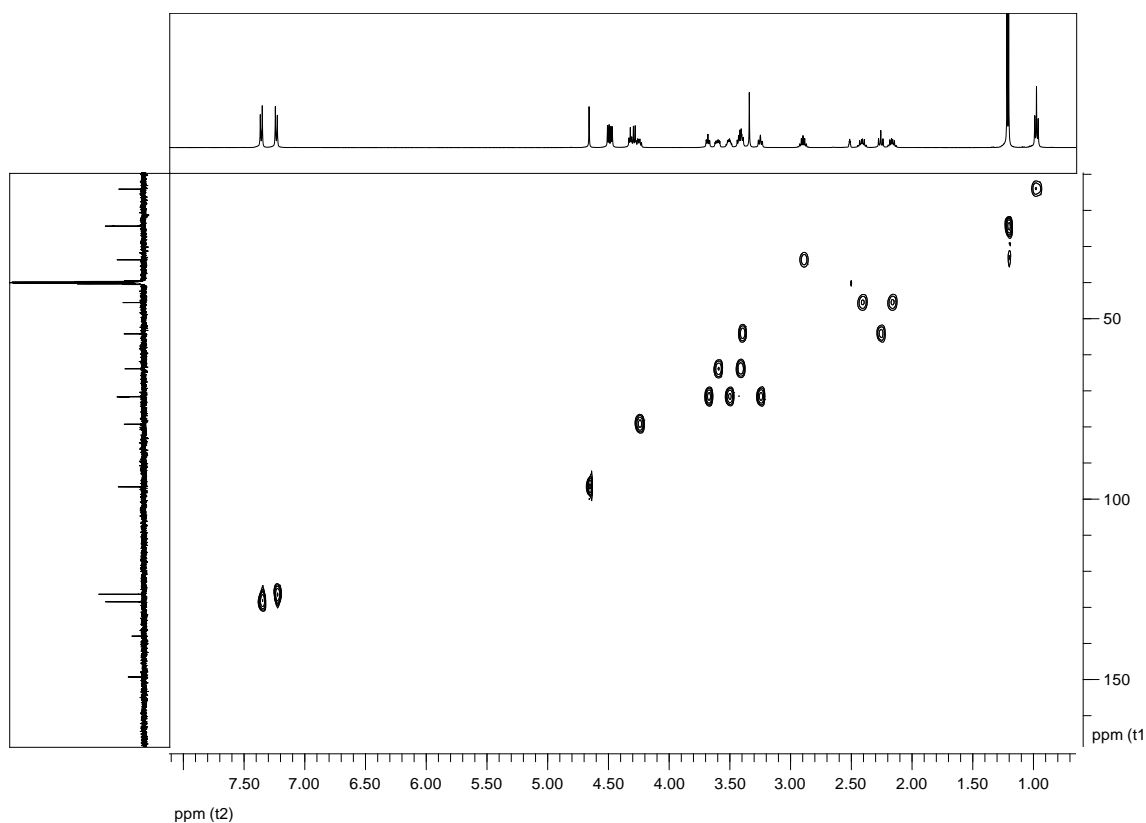

Figure S87. HMQC spectrum of 29a.

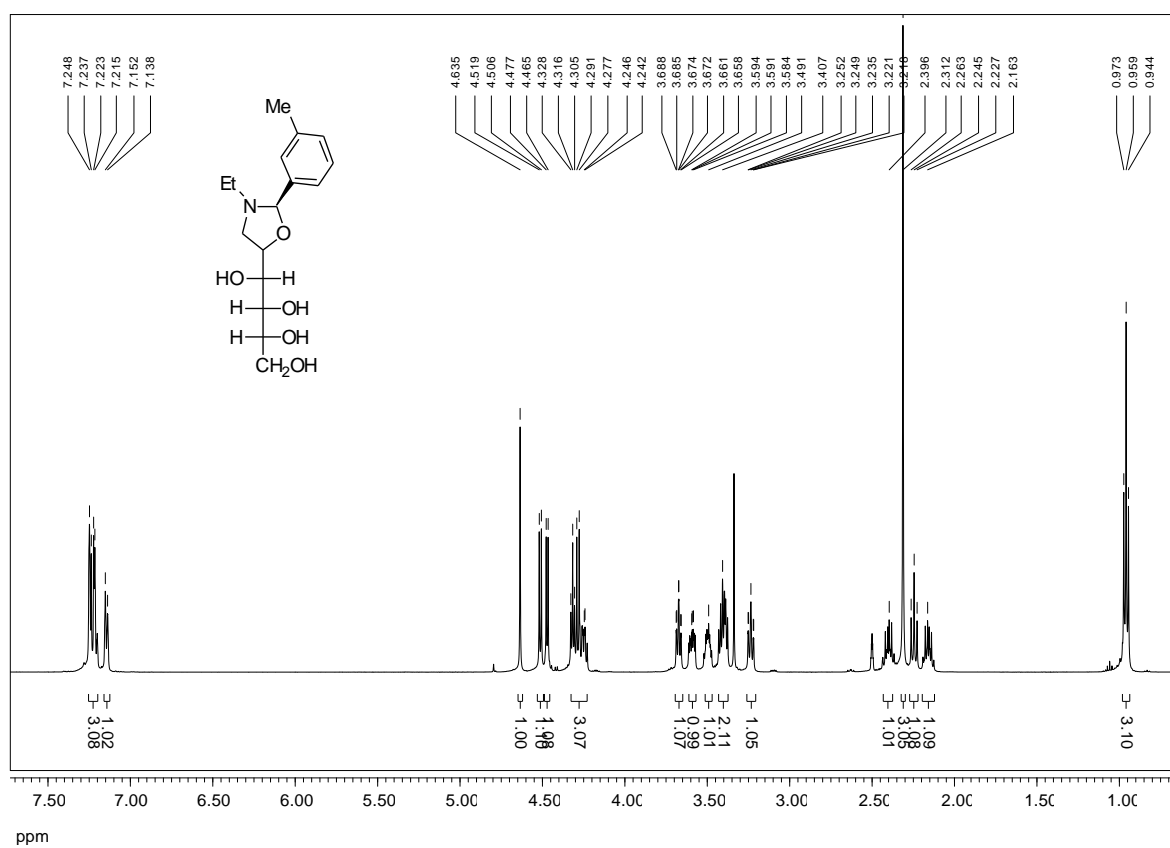

Figure S88. <sup>1</sup>H NMR spectrum of 30a.

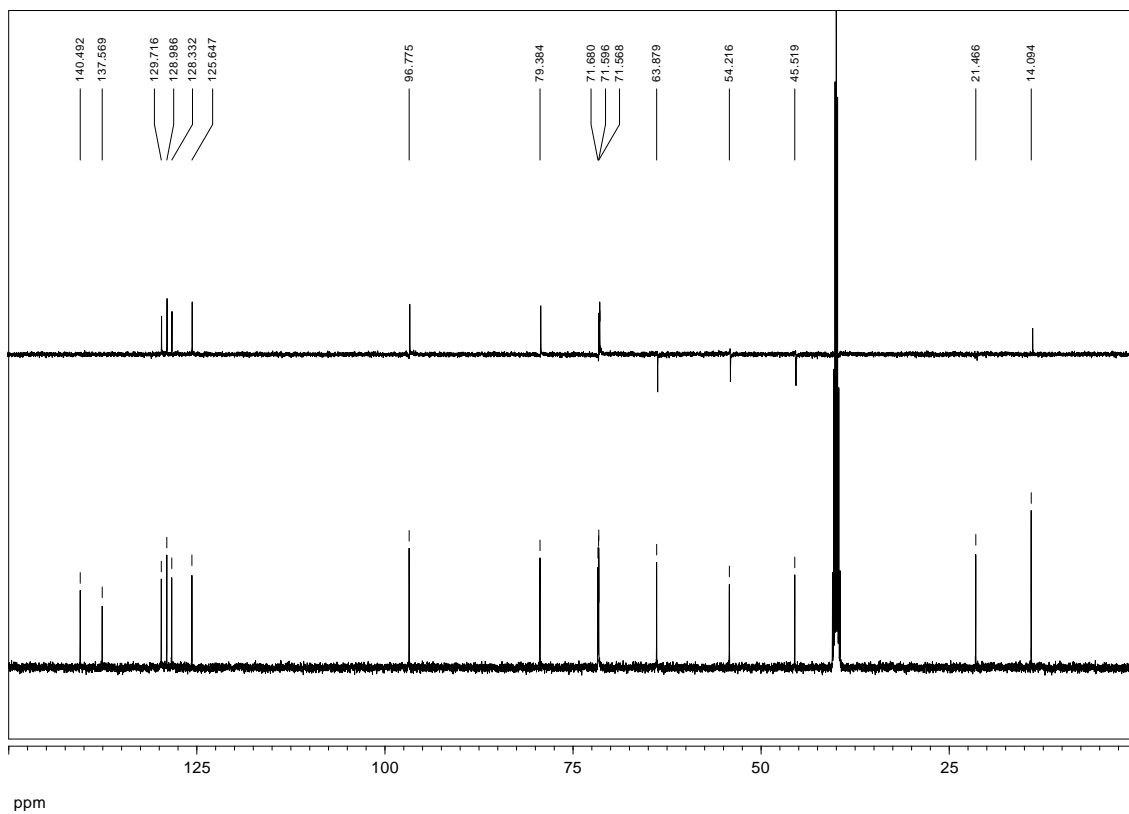

Figure S89.  $^{13}\text{C}$  NMR and DEPT spectra of **30a**.

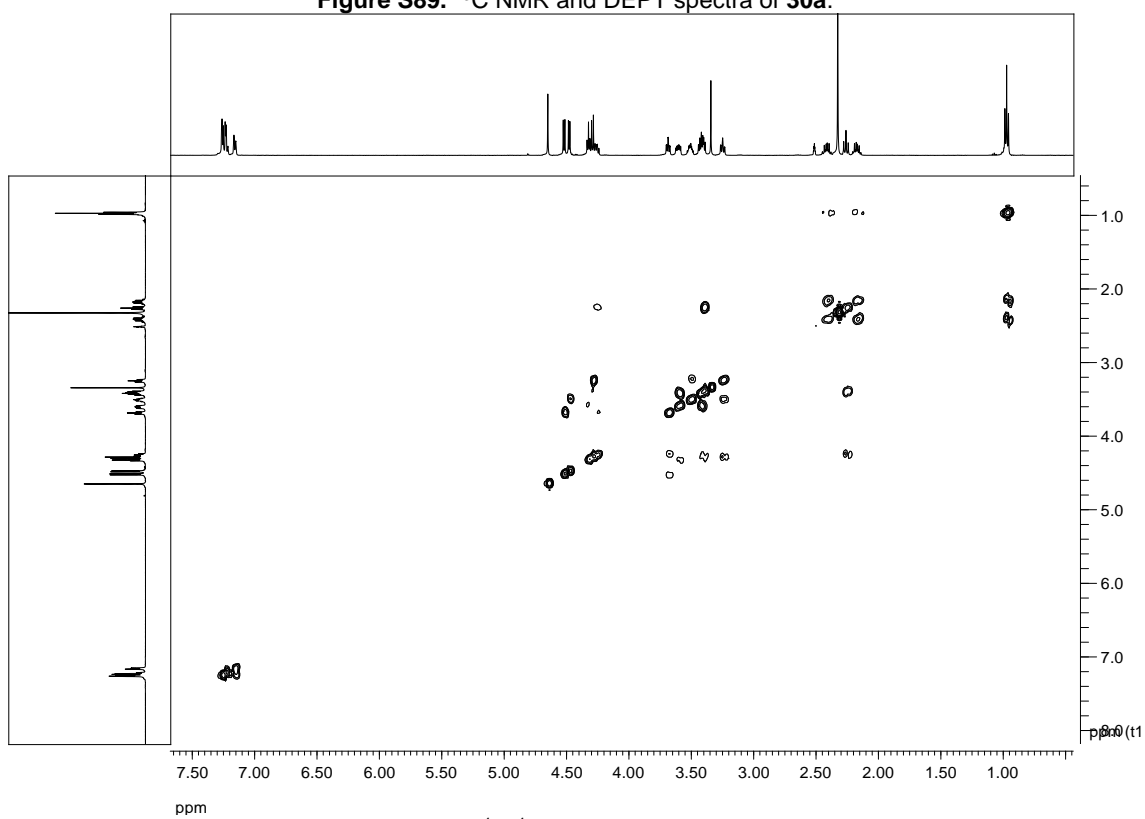

Figure S90.  $^1\text{H}$ - $^1\text{H}$  COSY spectrum of **30a**.

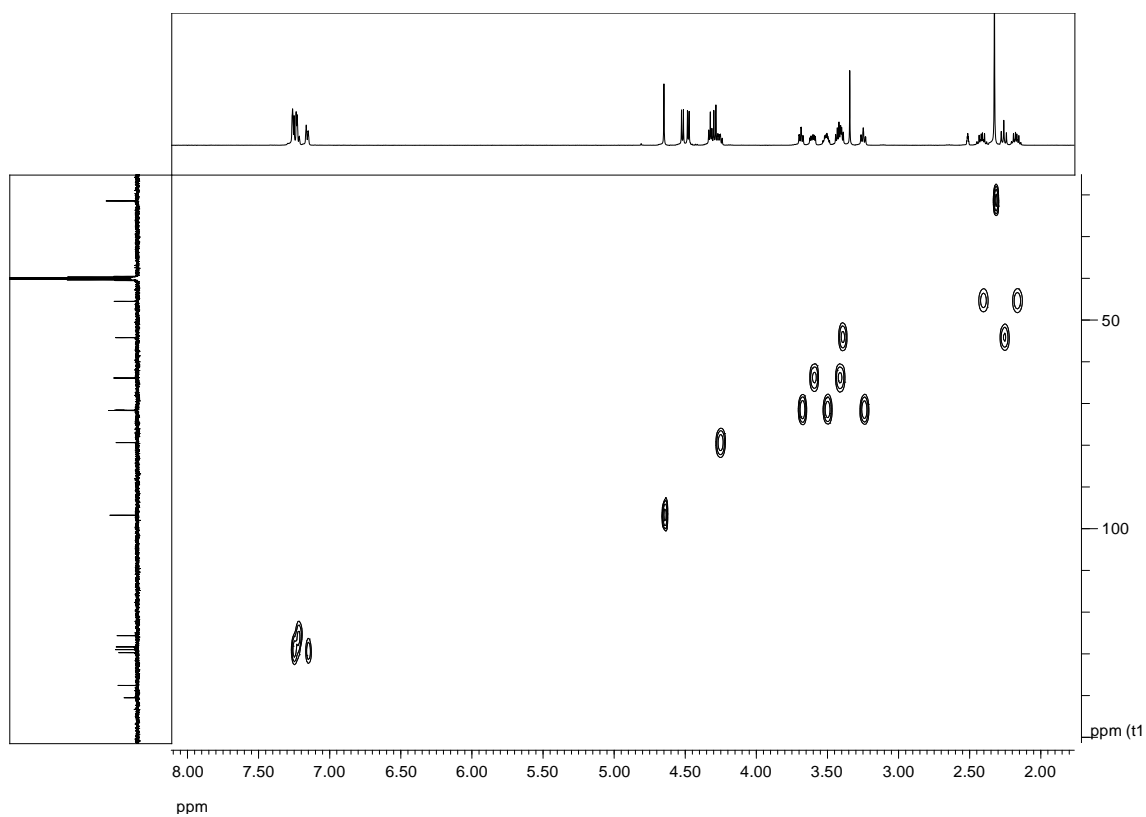

Figure S91. HMQC spectrum of 30a.

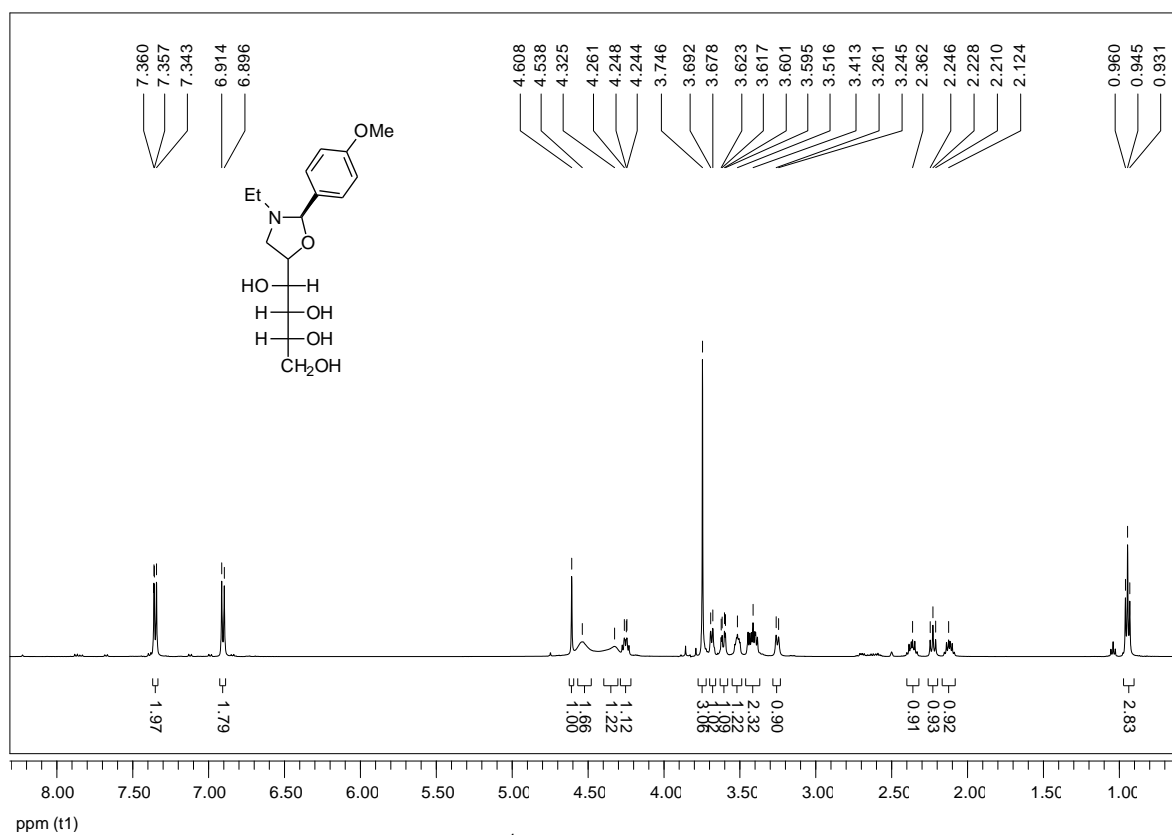

Figure S92. <sup>1</sup>H NMR spectrum of 31a.

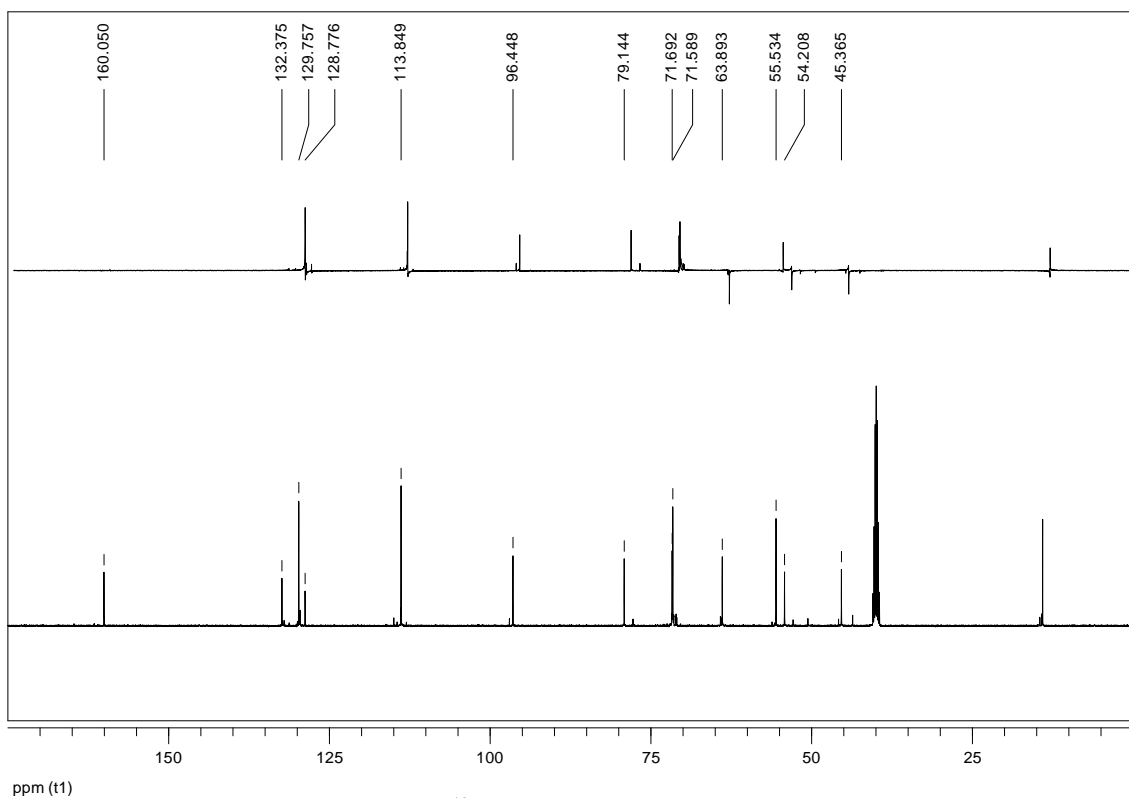

Figure S93. <sup>13</sup>C NMR and DEPT spectra of 31a.

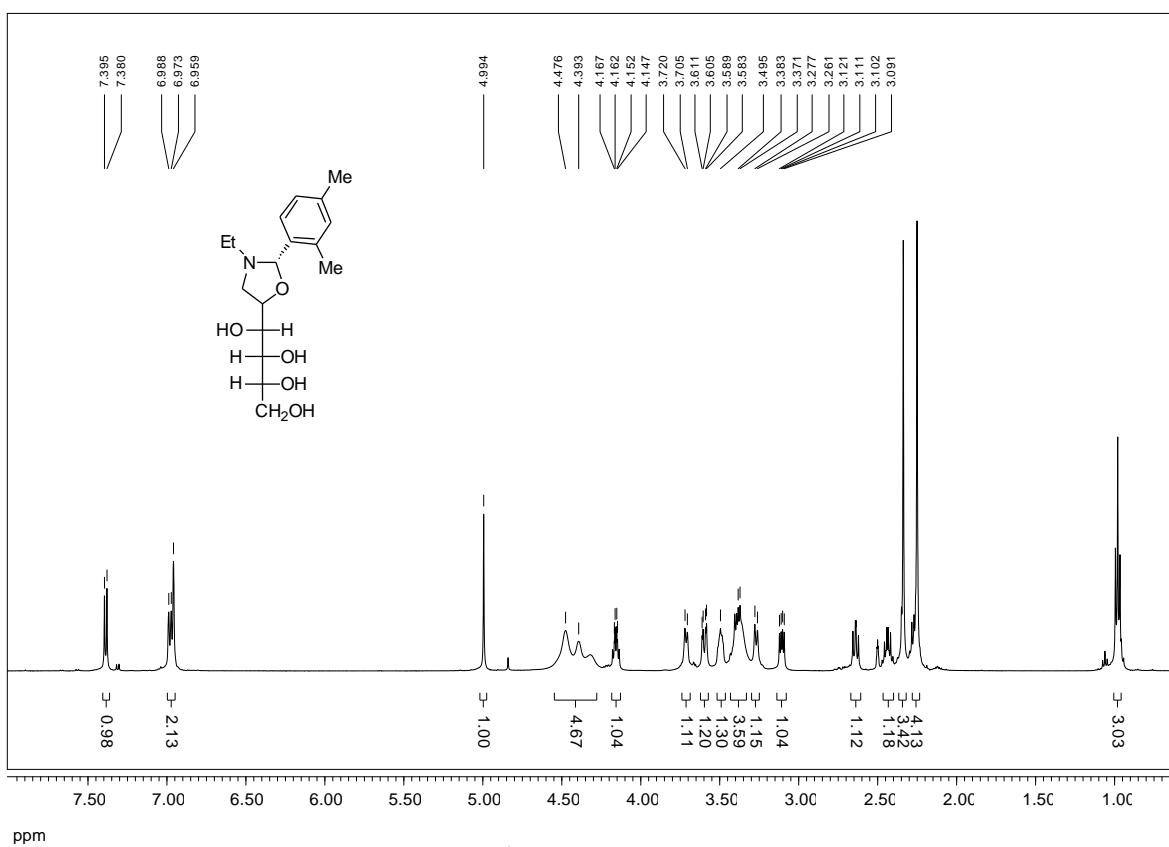

Figure S94. <sup>1</sup>H NMR spectrum of 32b.



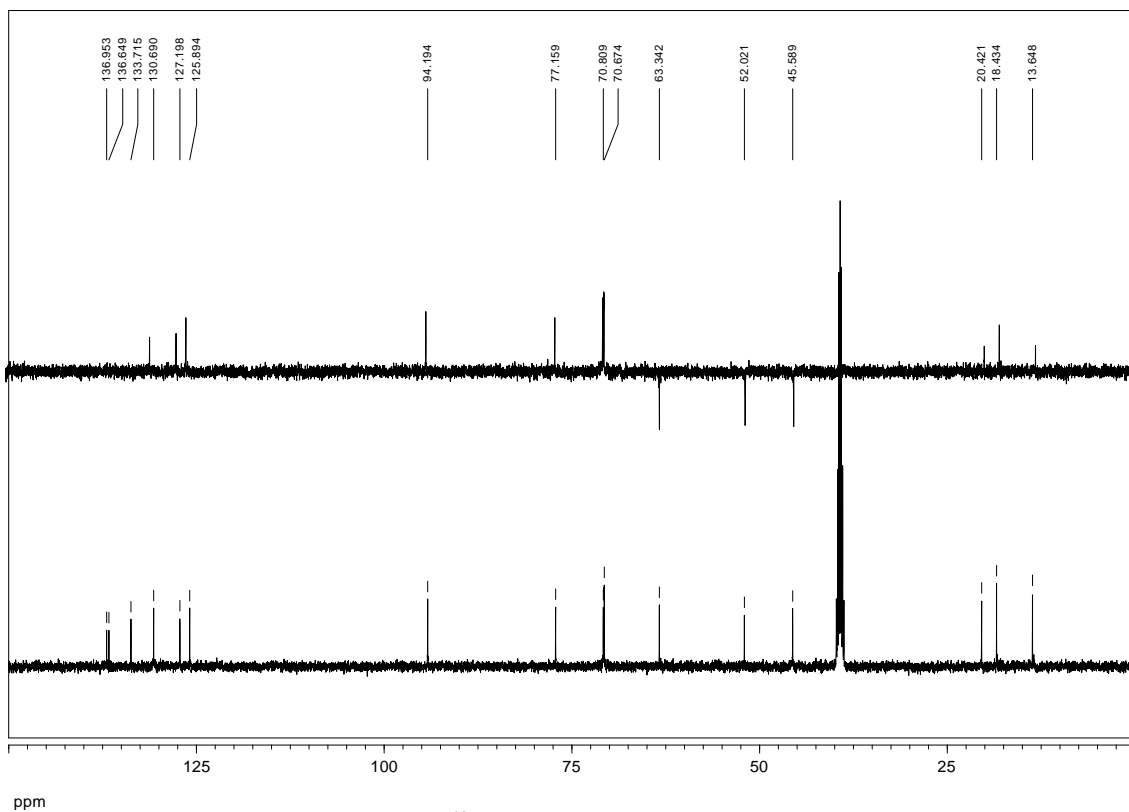

Figure S95. <sup>13</sup>C NMR and DEPT spectra of 32b.

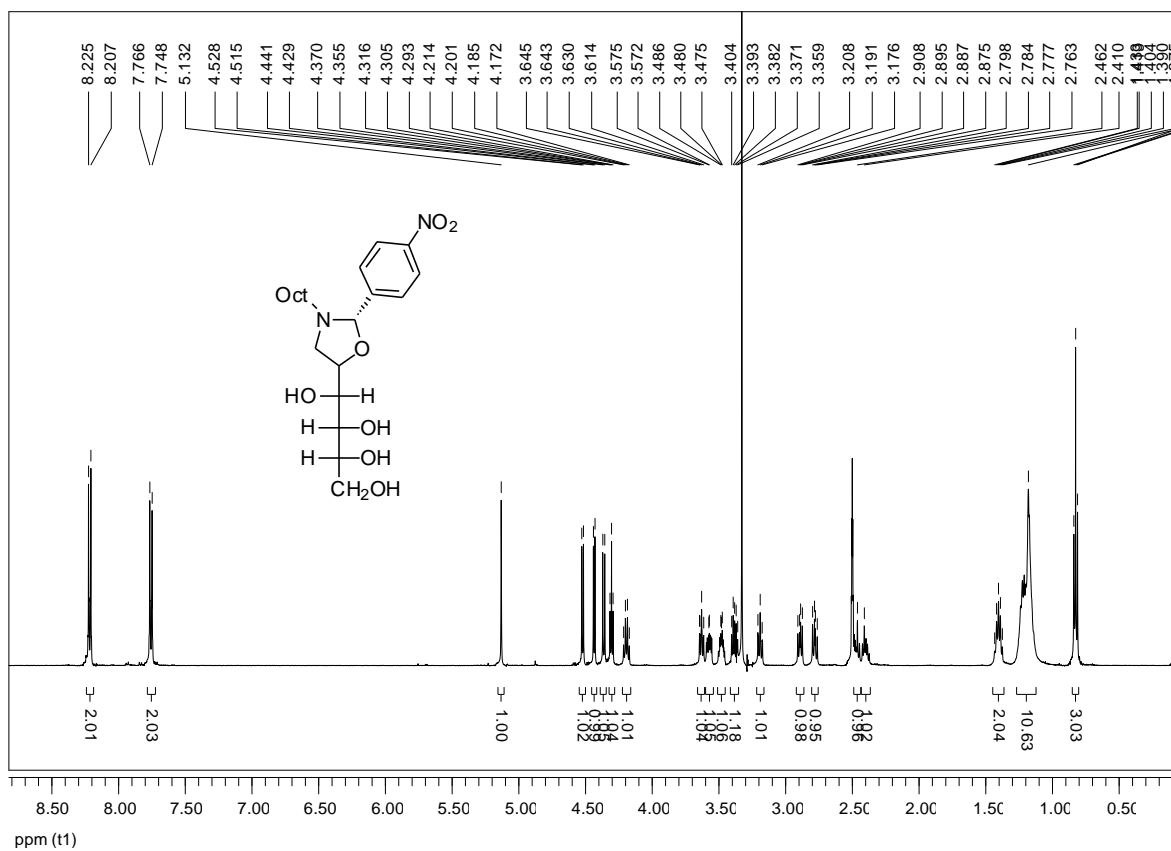

Figure S96. <sup>1</sup>H NMR spectrum of 34b.

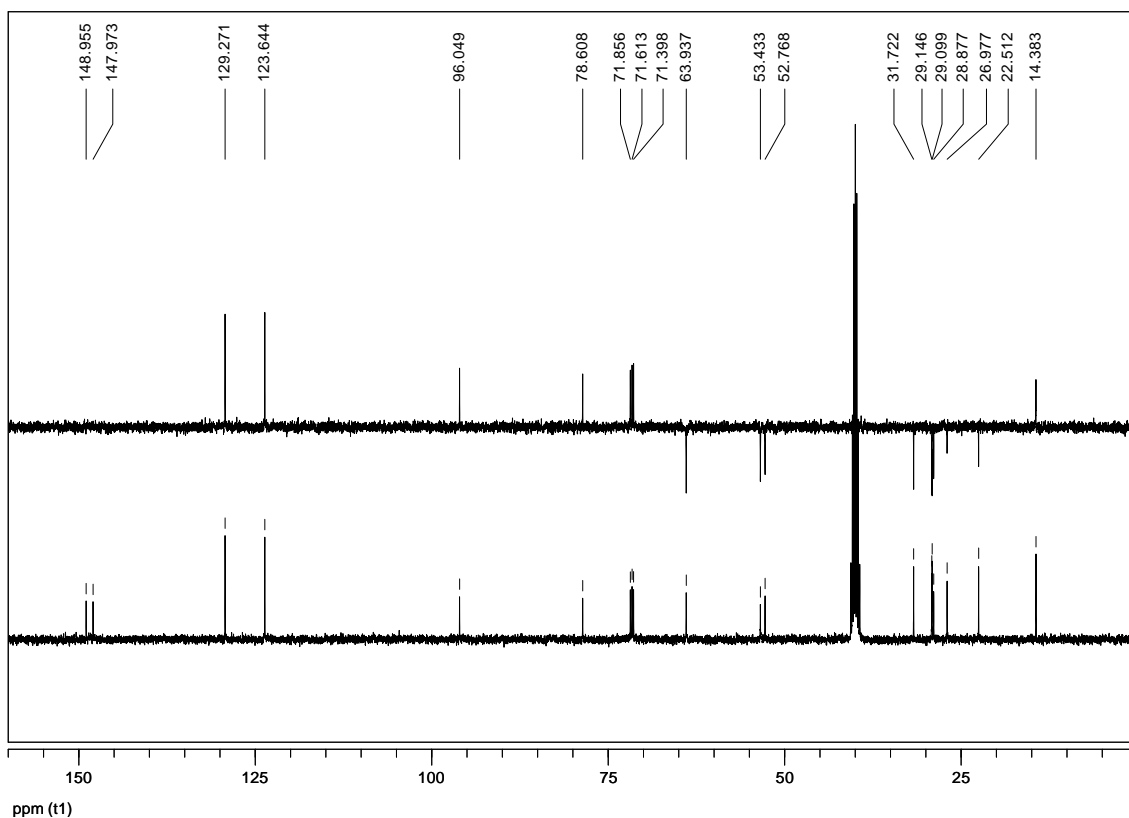

Figure S97.  $^{13}\text{C}$  NMR and DEPT spectra of **34b**.

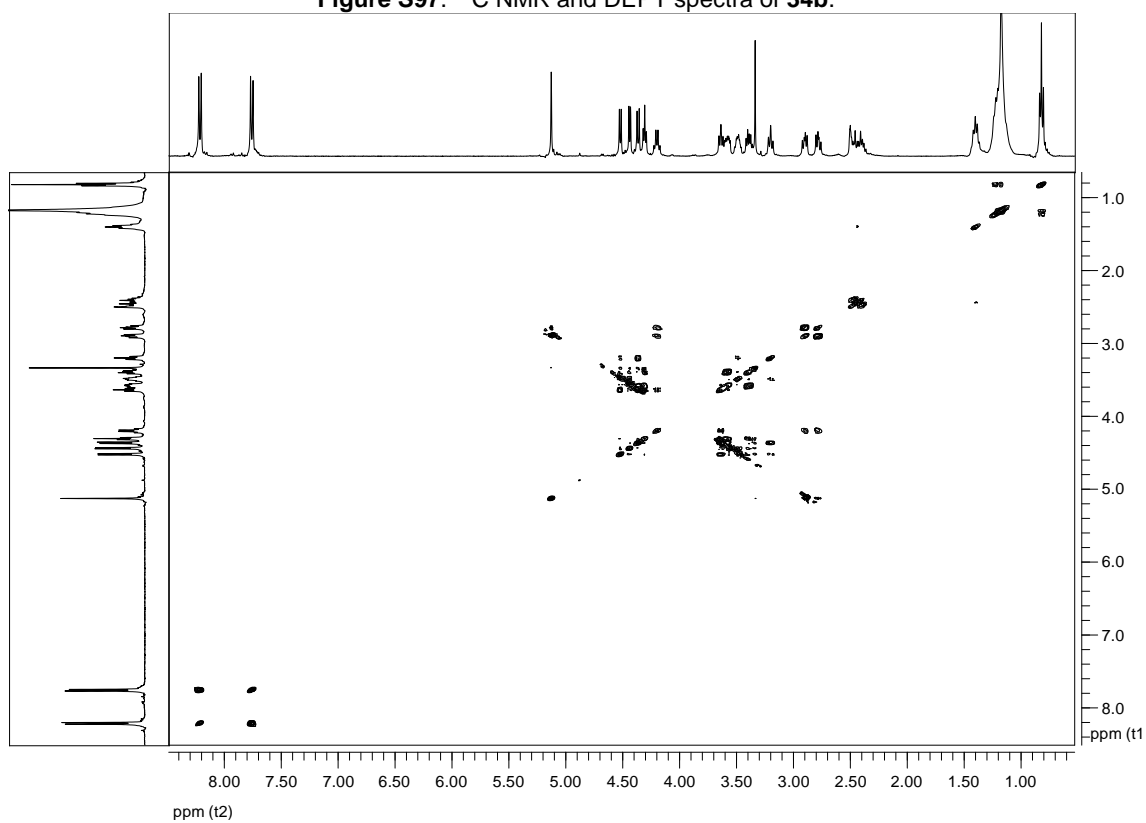

Figure S98.  $^1\text{H}$ - $^1\text{H}$  COSY spectrum of **34b**.

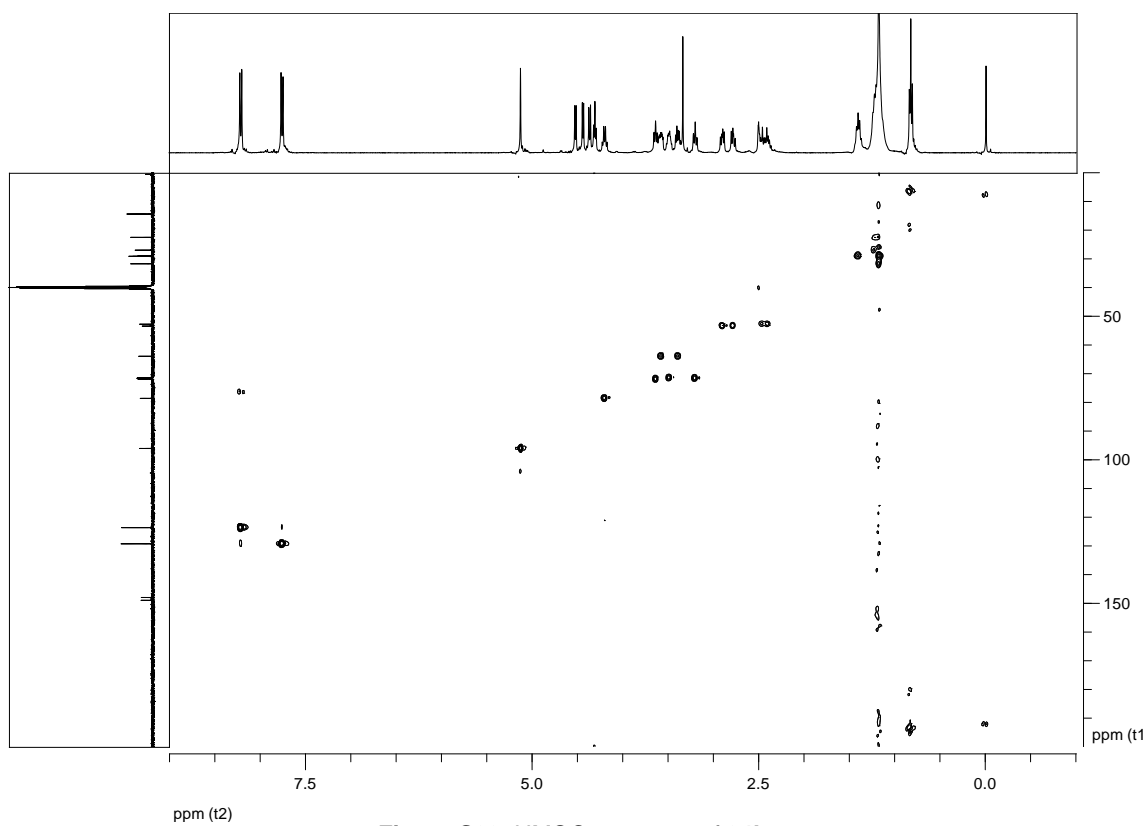

Figure S99. HMQC spectrum of 34b.

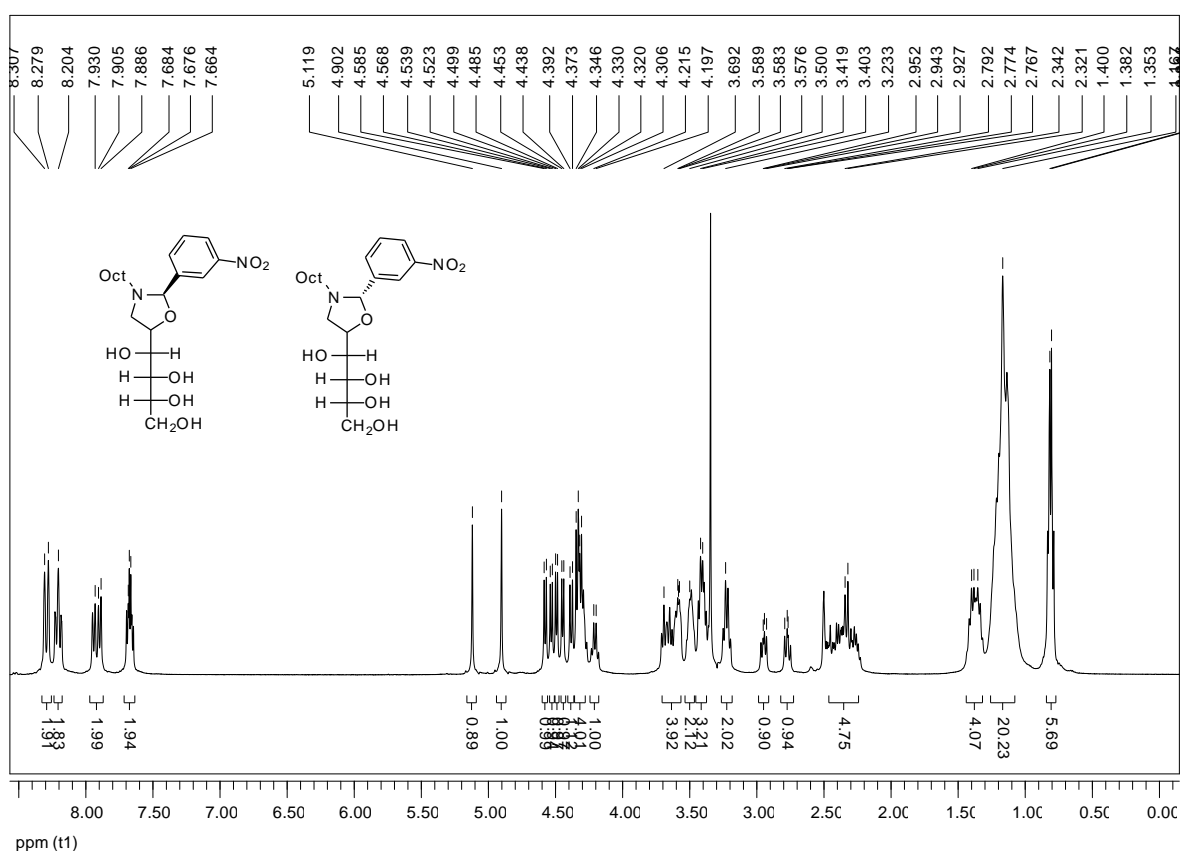

Figure S100. <sup>1</sup>H NMR spectrum of 35a and 35b.

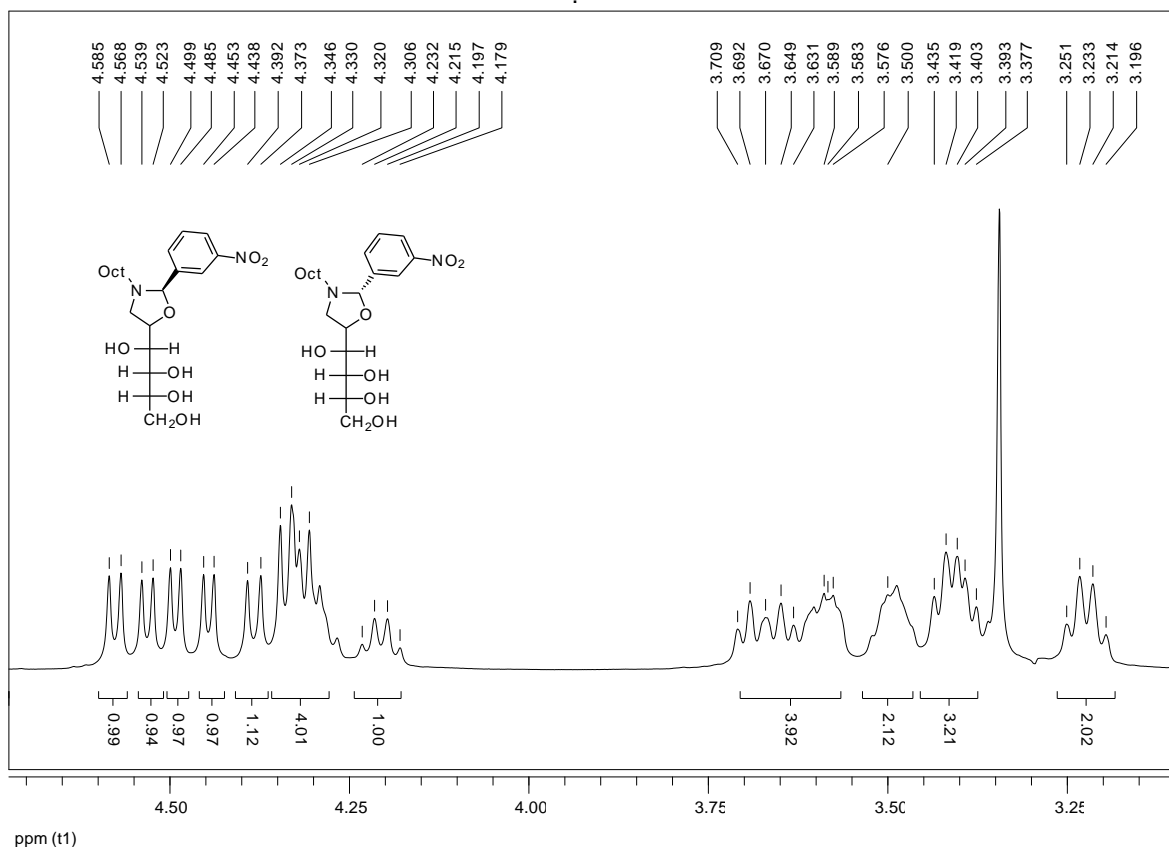

Figure S101. <sup>1</sup>H NMR spectrum of 35a and 35b

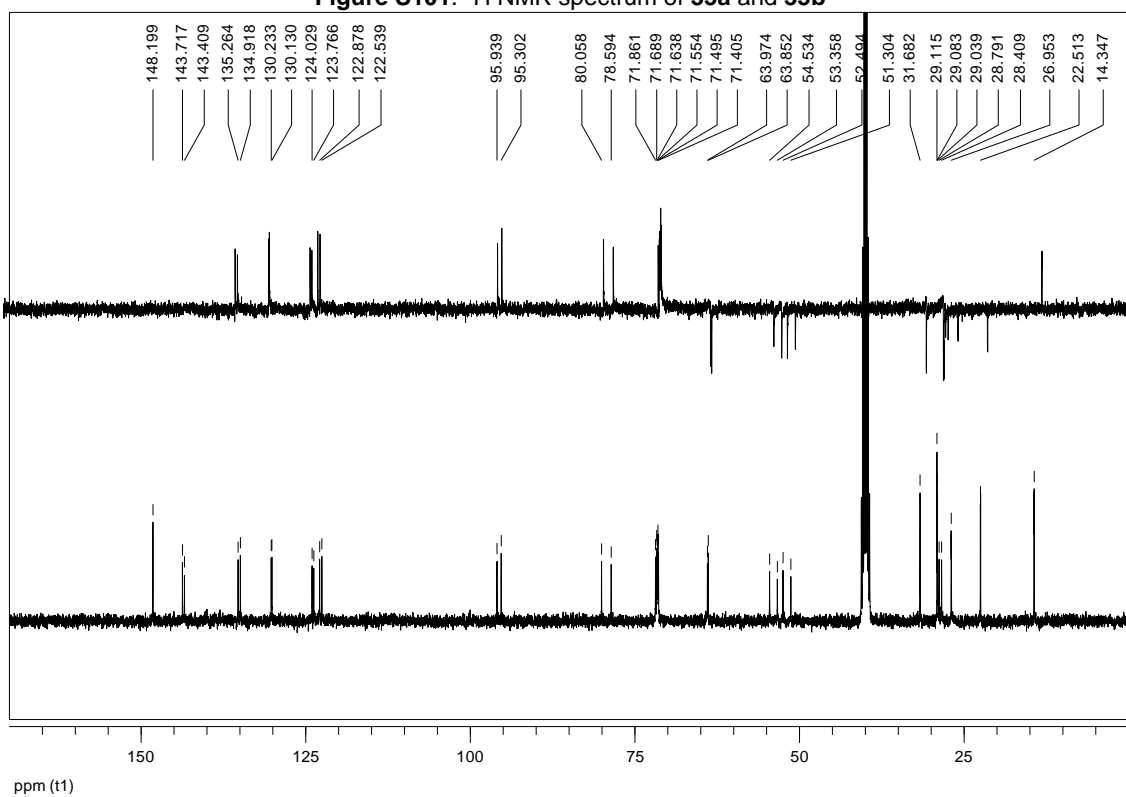

Figure S102. <sup>13</sup>C NMR and DEPT spectra of 35a and 35b.

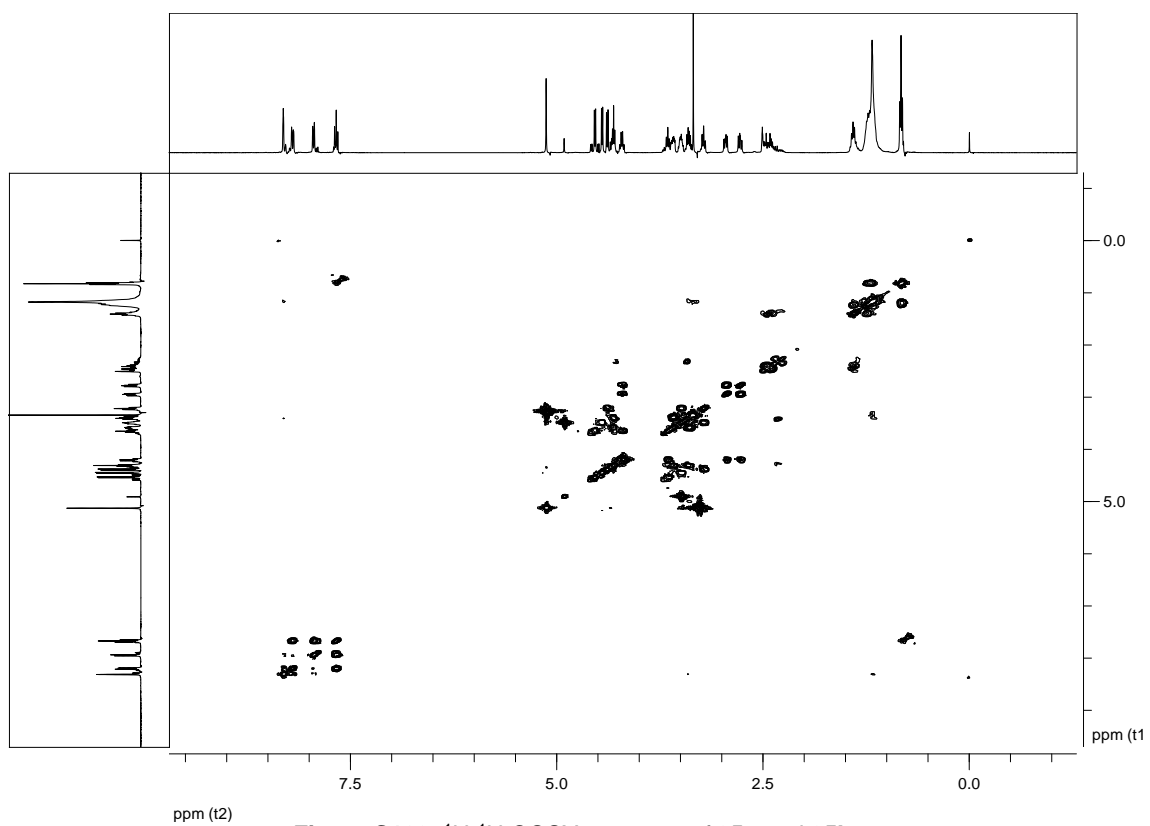

**Figure S103.**  $^1\text{H}$ - $^1\text{H}$  COSY spectrum of **35a** and **35b**.

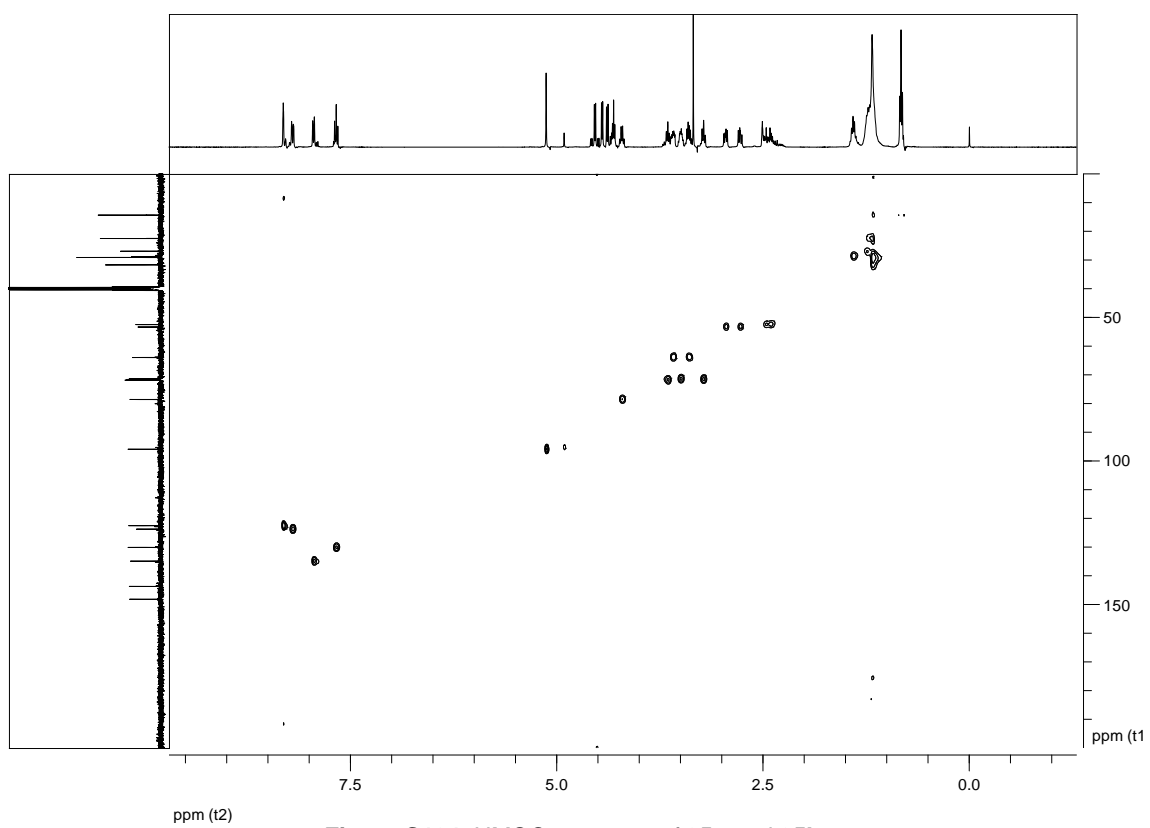

**Figure S104.** HMBC spectrum of **35a** and **35b**.

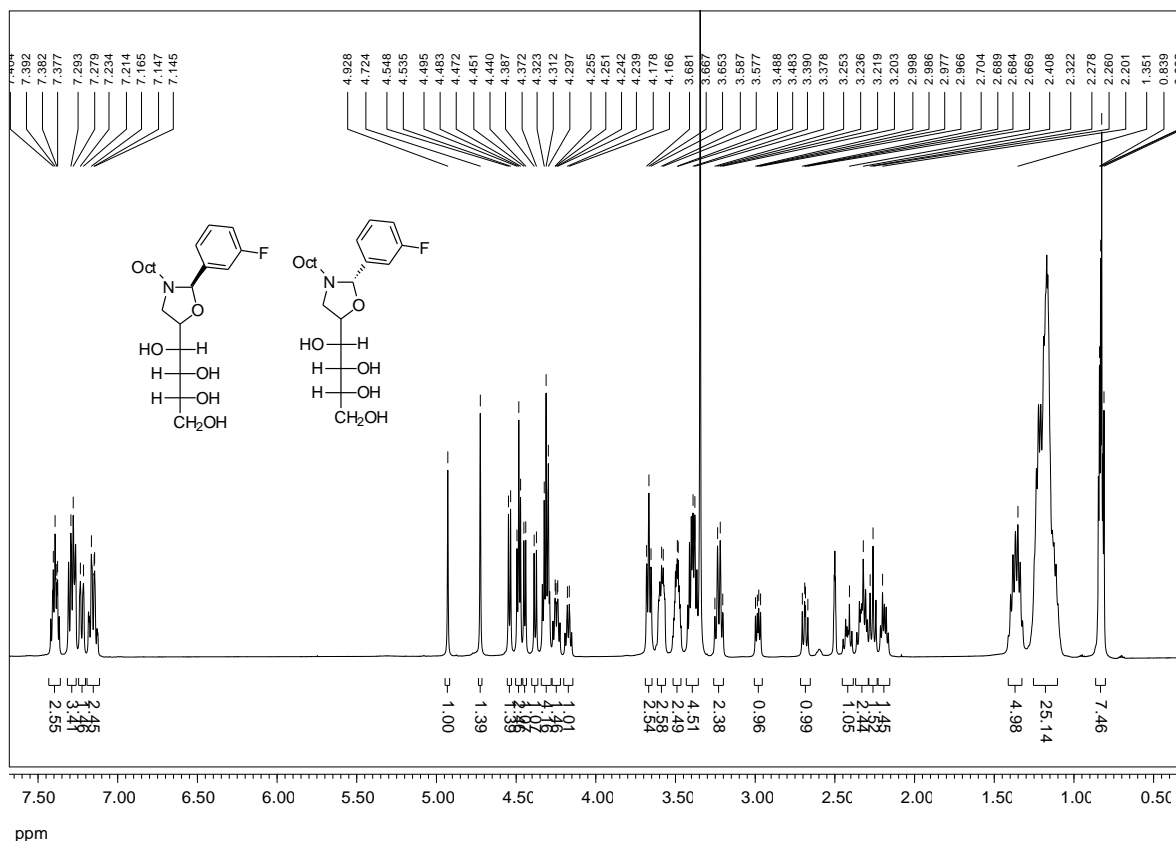

Figure S105. <sup>1</sup>H NMR spectrum of 36a and 36b.

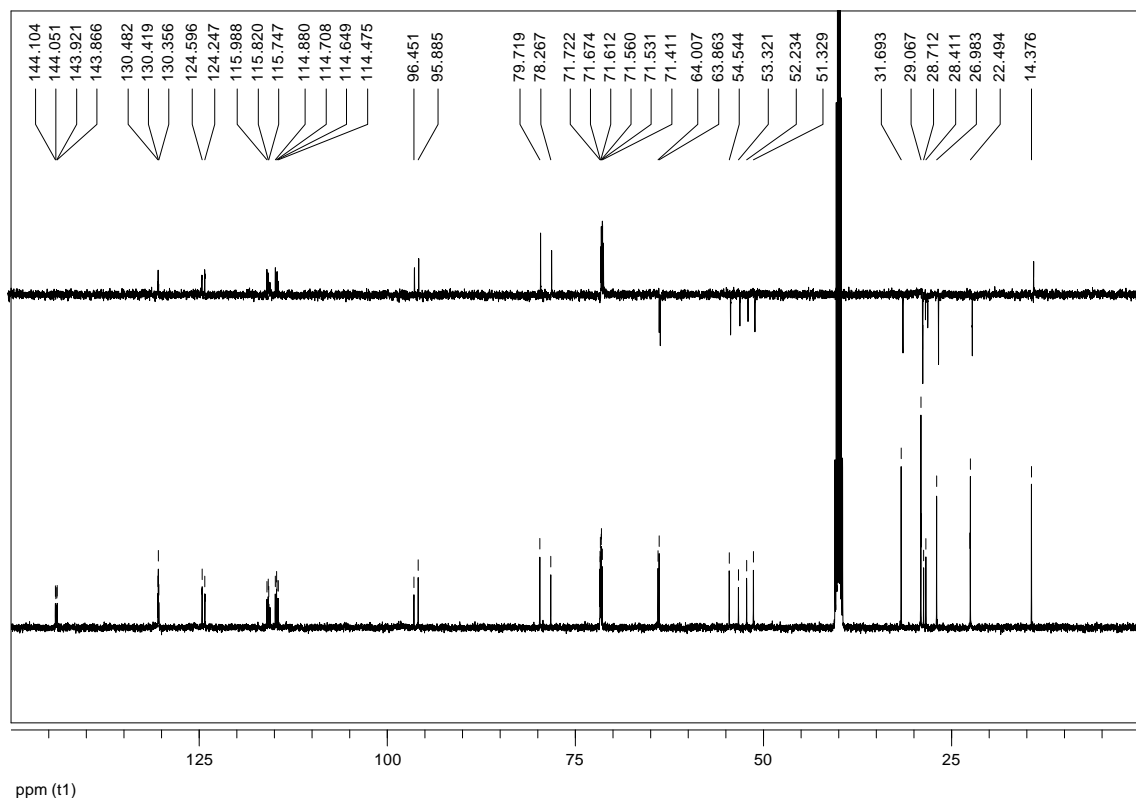

Figure S106. <sup>13</sup>C NMR and DEPT spectra of 36a and 36b.

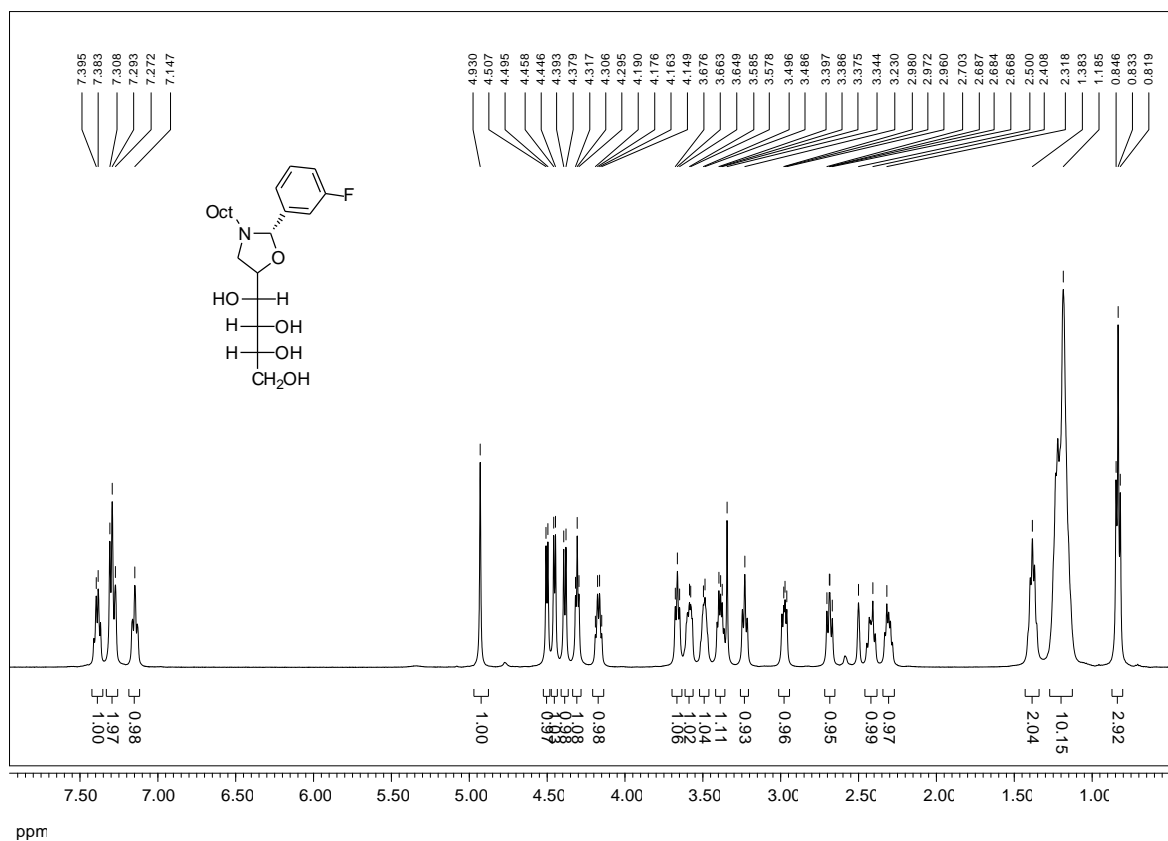

Figure S107. <sup>1</sup>H NMR spectrum of 36b.

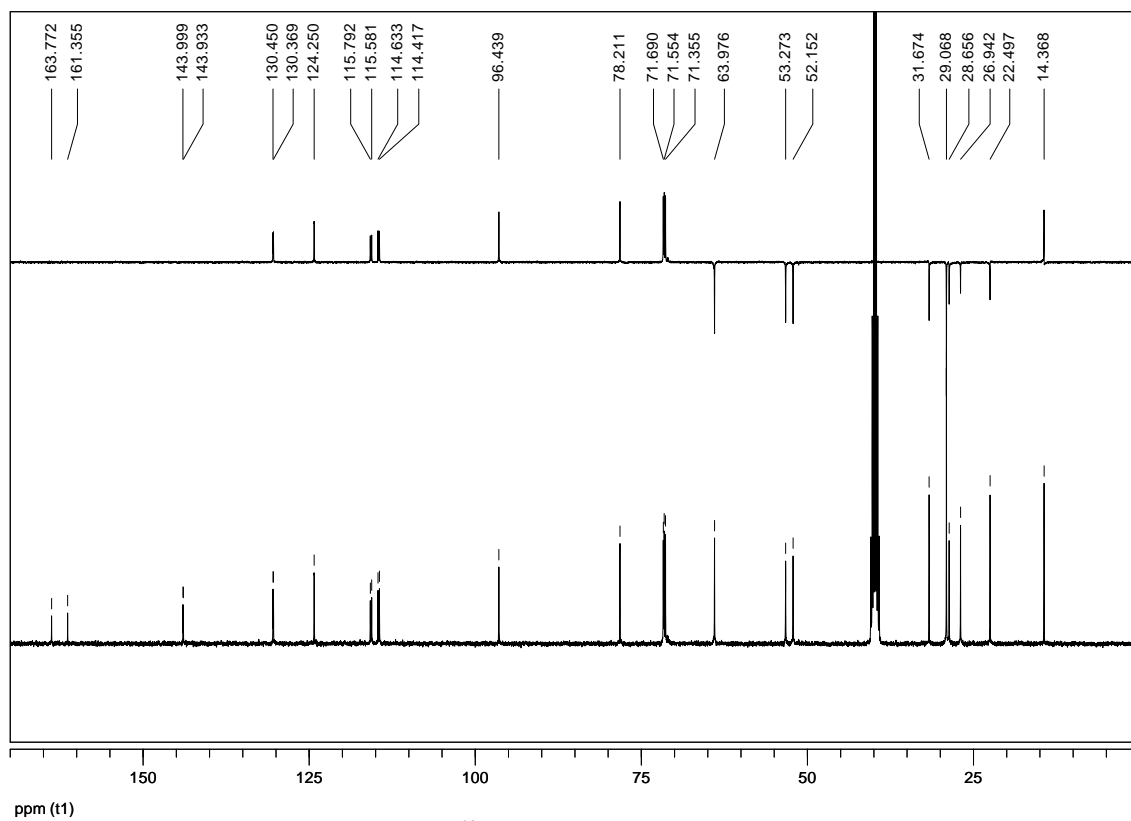

Figure S108. <sup>13</sup>C NMR and DEPT spectra of 36b.

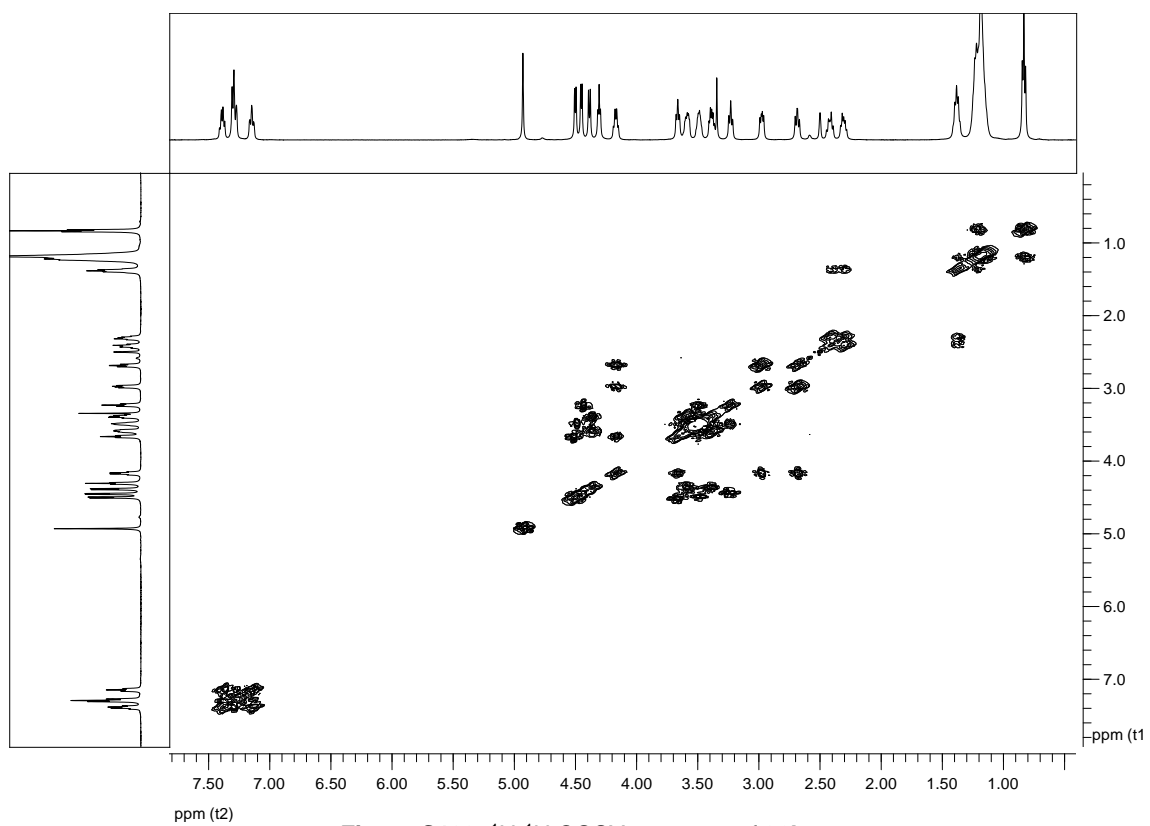

**Figure S109.**  $^1\text{H}$ - $^1\text{H}$  COSY spectrum of **36b**.

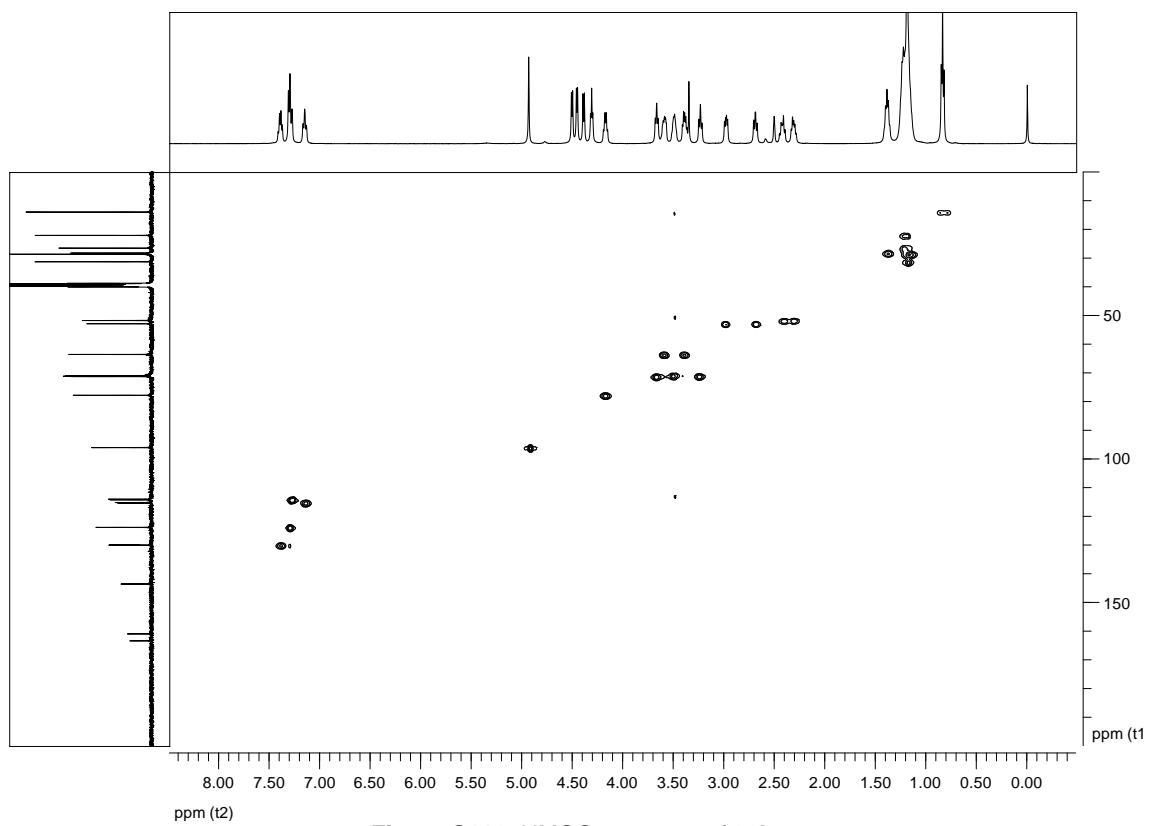

**Figure S110.** HMQC spectrum of **36b**.



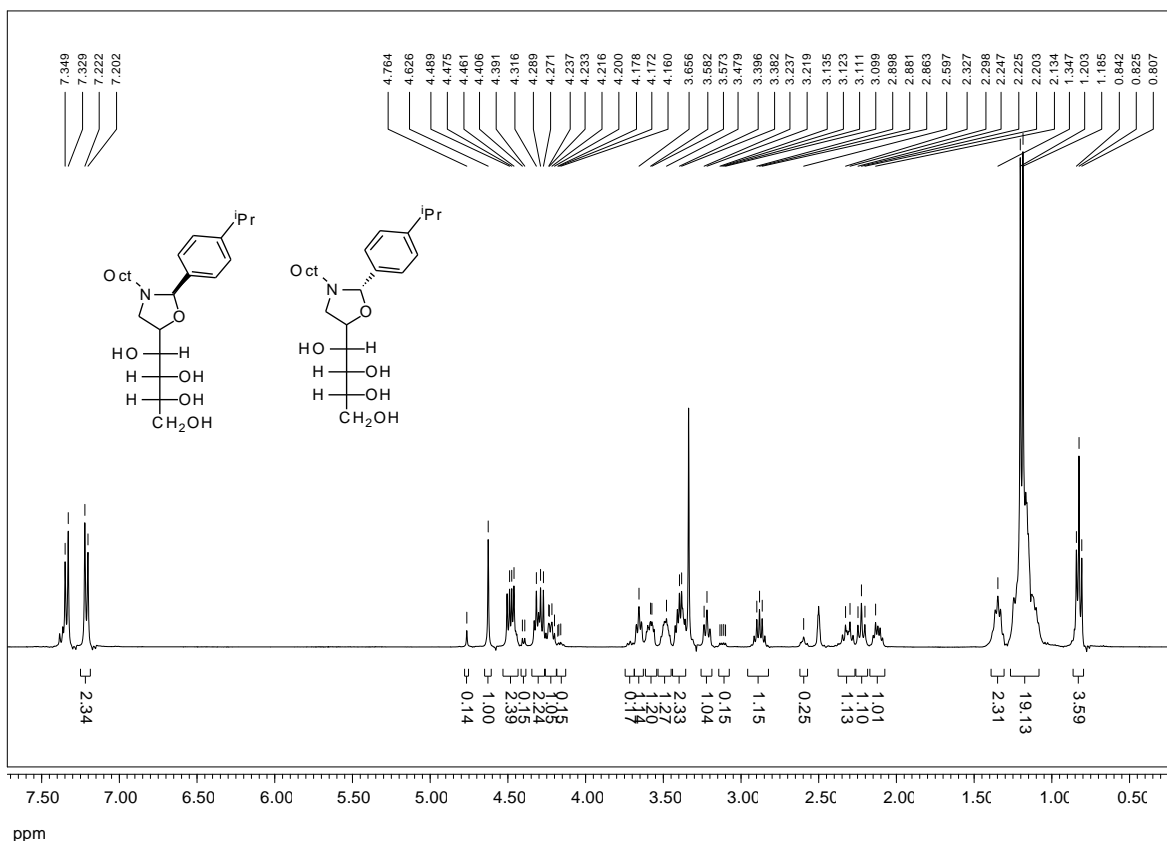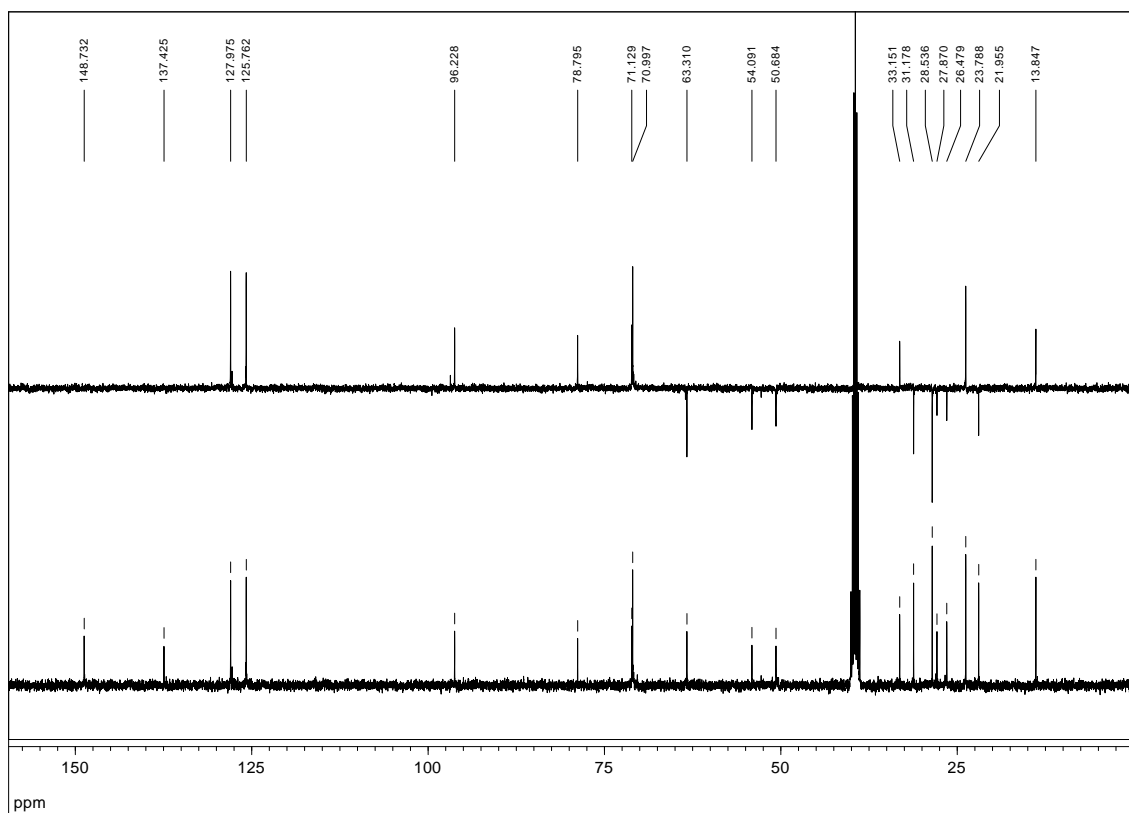



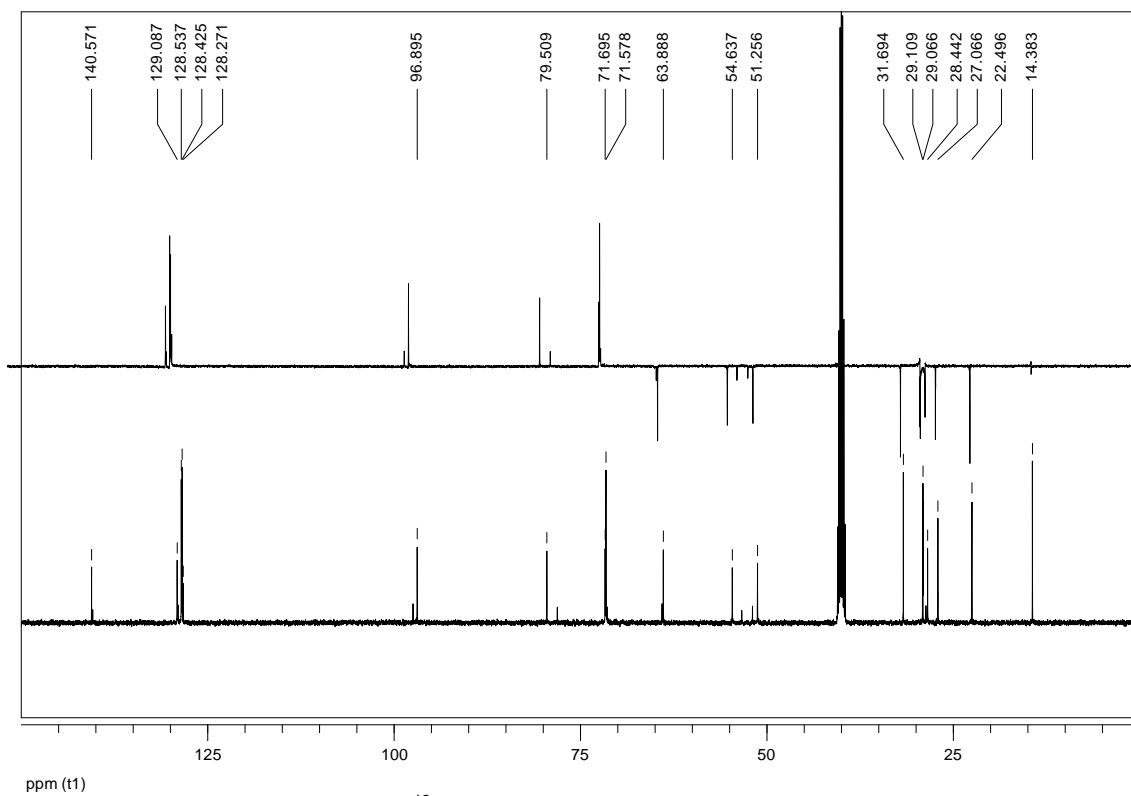

Figure S115.  $^{13}\text{C}$  NMR and DEPT spectra of **38a** and **38b**.

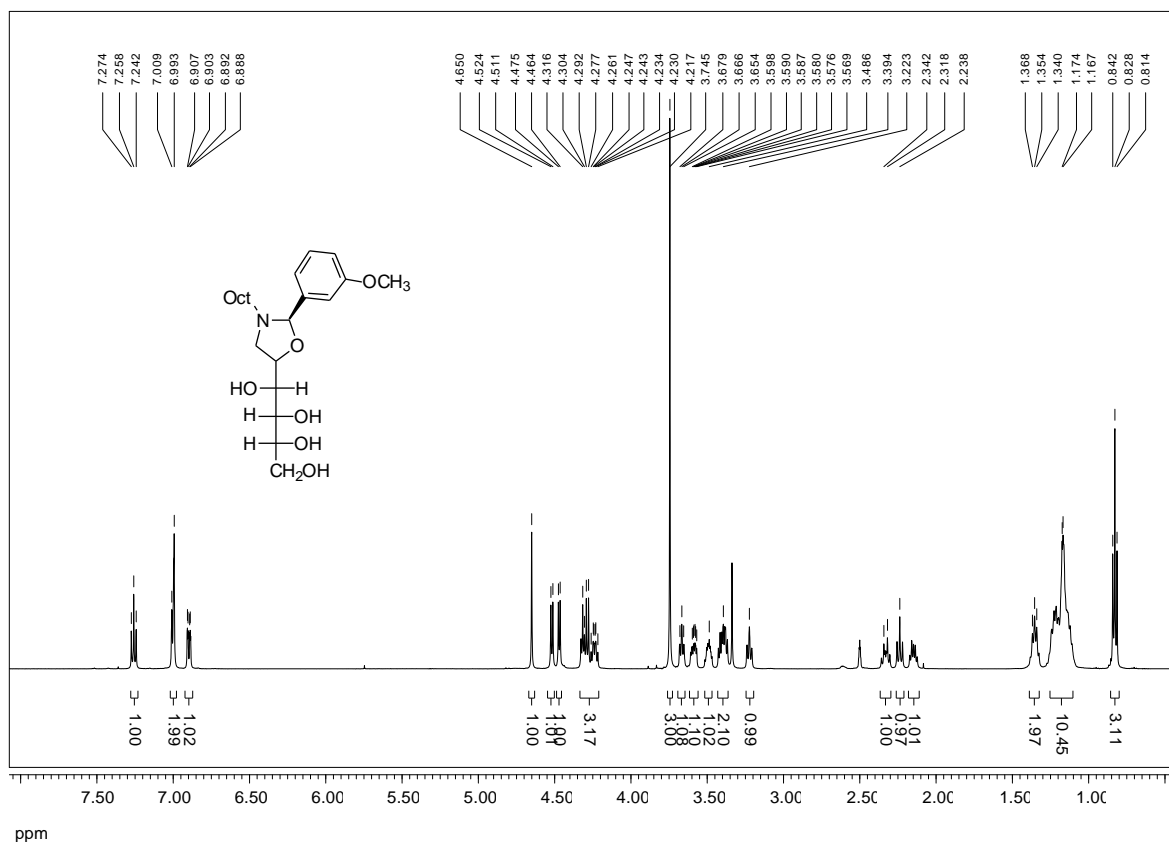

Figure S116.  $^1\text{H}$  NMR spectrum of **39a**.

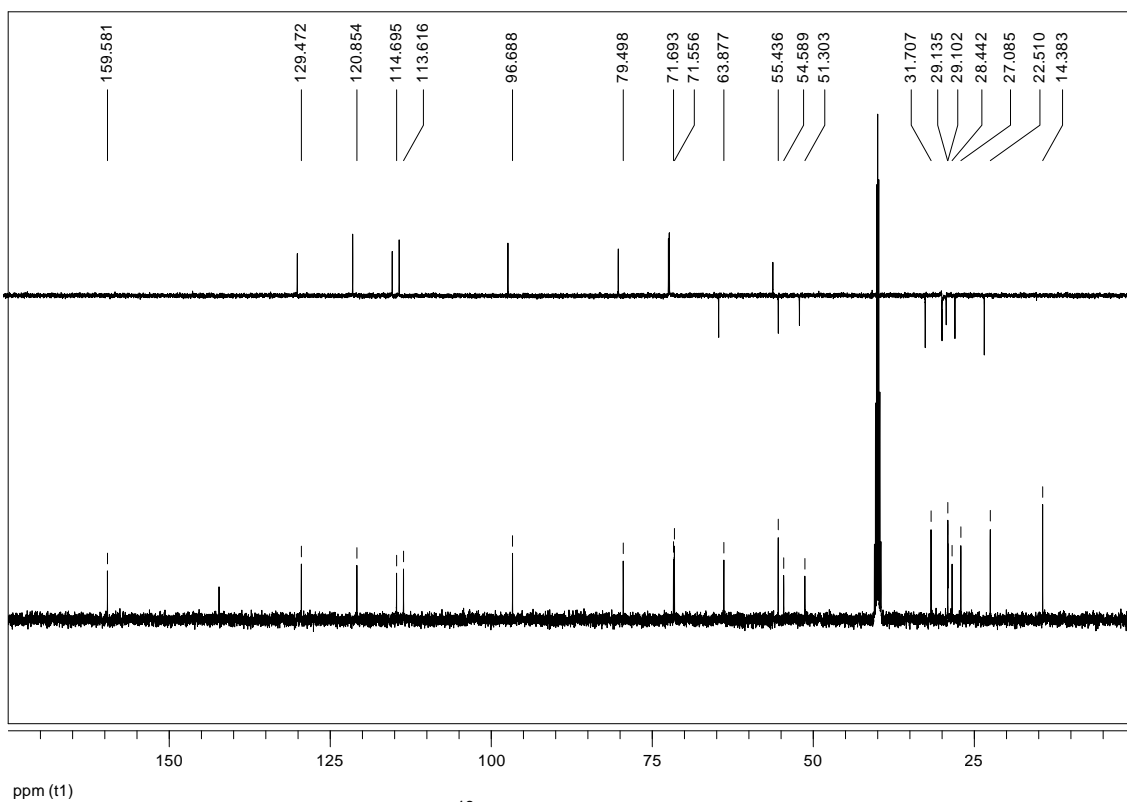

Figure S117.  $^{13}\text{C}$  NMR and DEPT spectra of 39a.

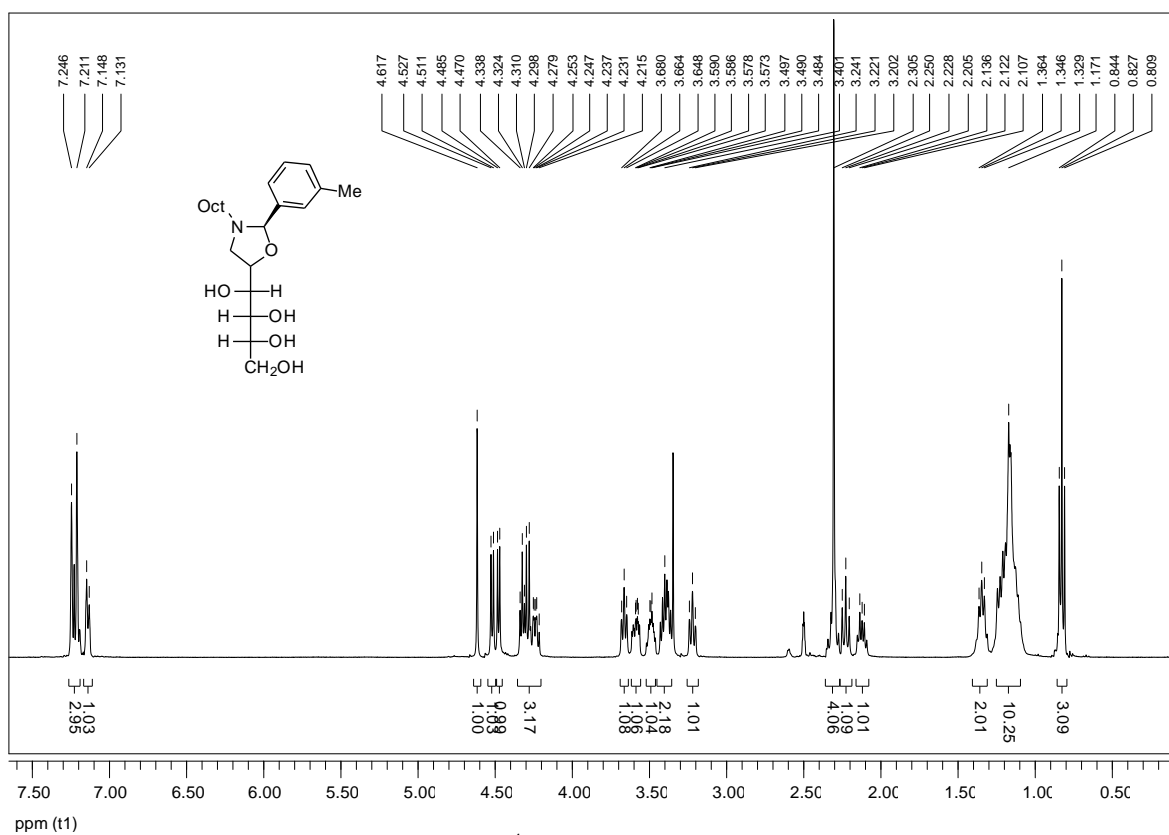

Figure S118.  $^1\text{H}$  NMR spectrum of 40a.

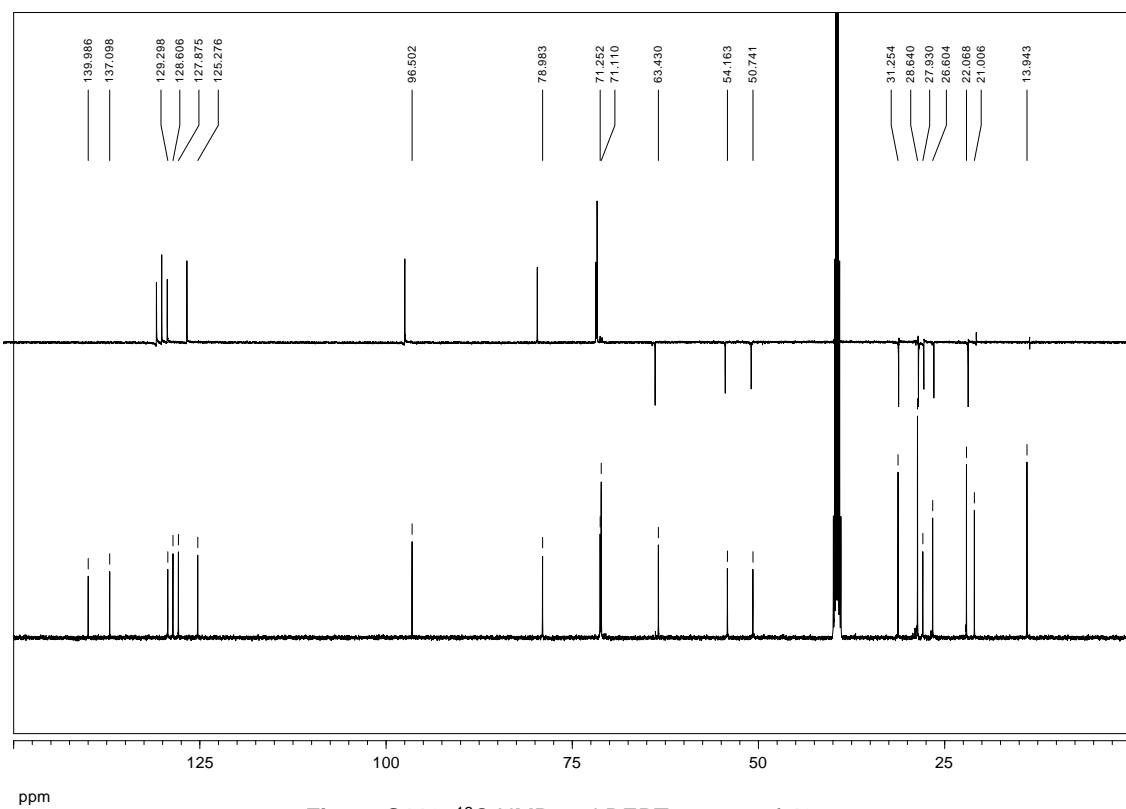

Figure S119.  $^{13}\text{C}$  NMR and DEPT spectra of 40a.

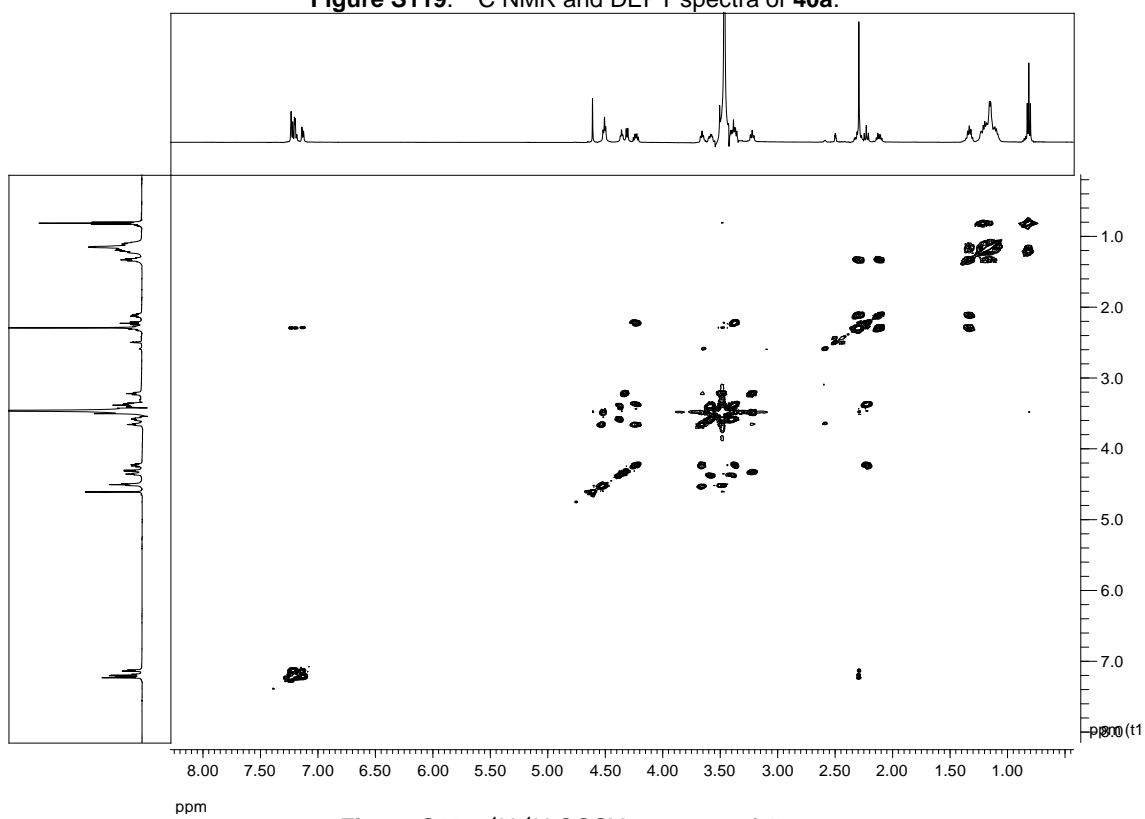

Figure S120.  $^1\text{H}$ - $^1\text{H}$  COSY spectrum of 40a.

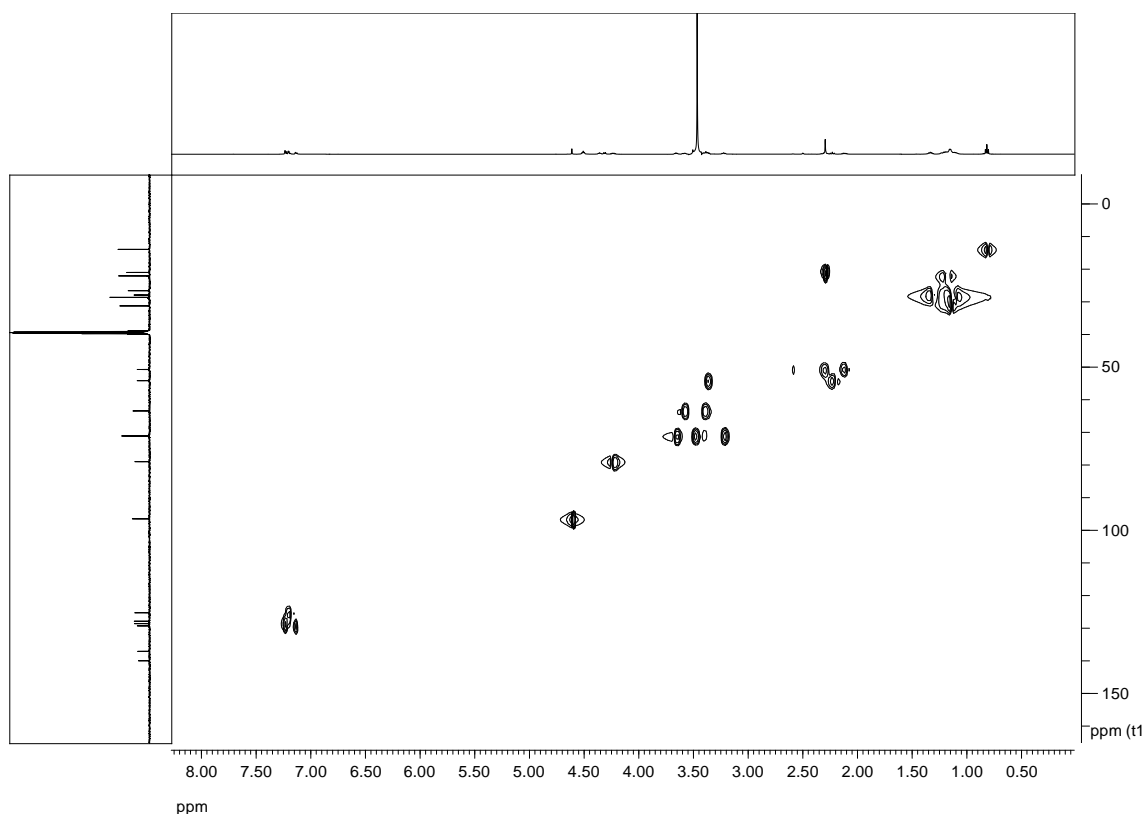

Figure S121. HMQC spectrum of 40a.

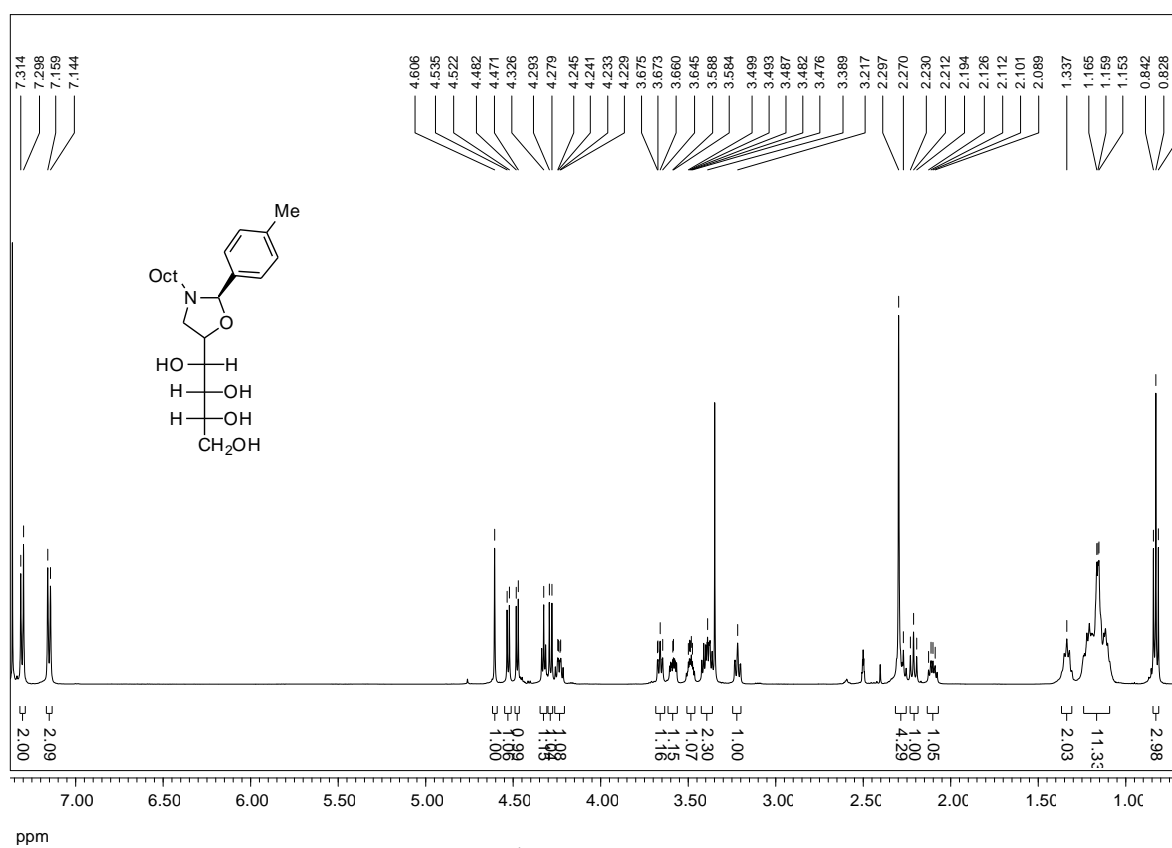

Figure S122. <sup>1</sup>H NMR spectrum of 41a.

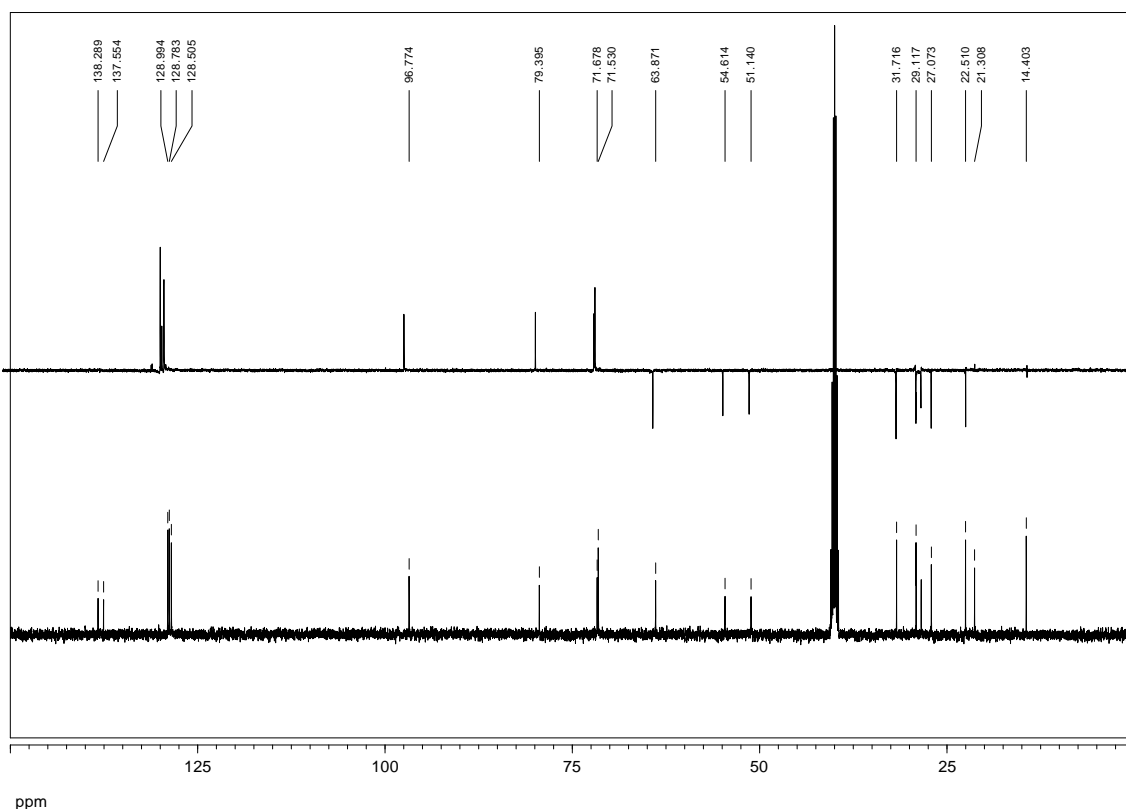

Figure S123.  $^{13}\text{C}$  NMR and DEPT spectra of 41a.

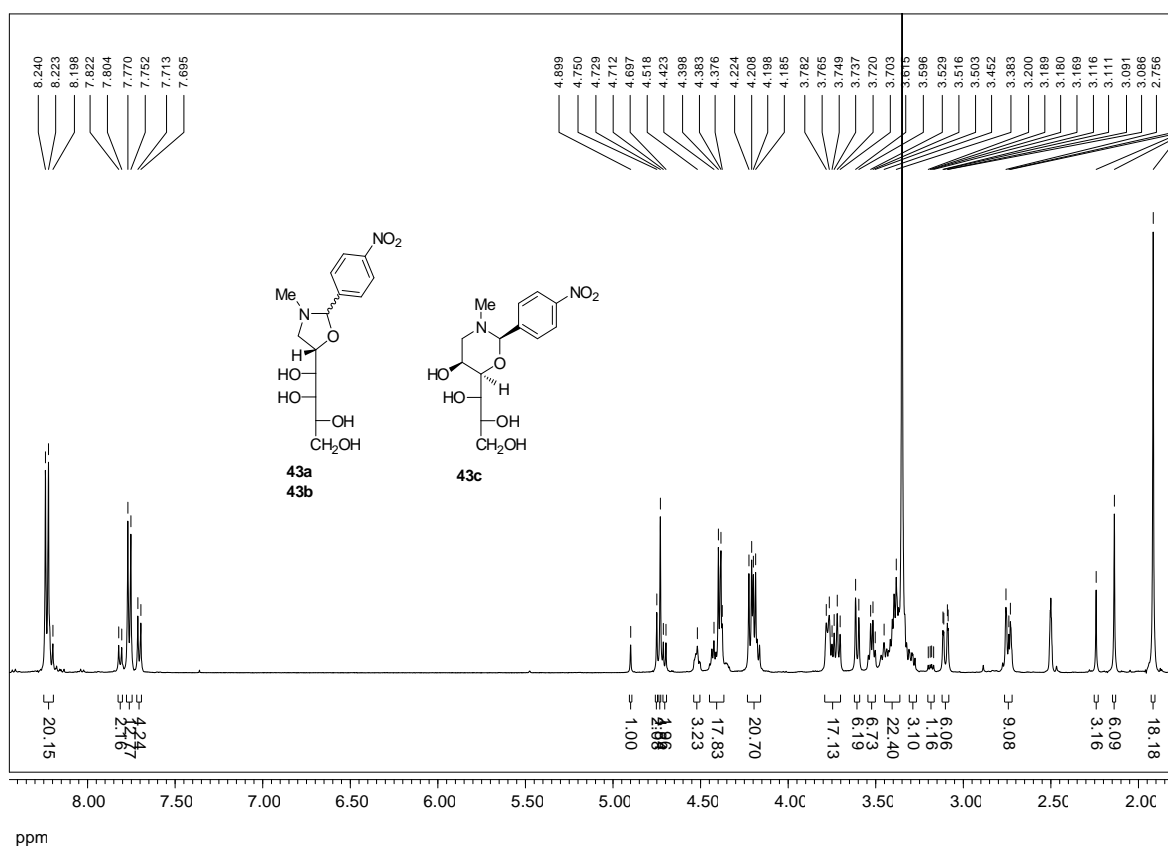

Figure S124.  $^1\text{H}$  NMR spectrum of 43a, 43b and 43c.

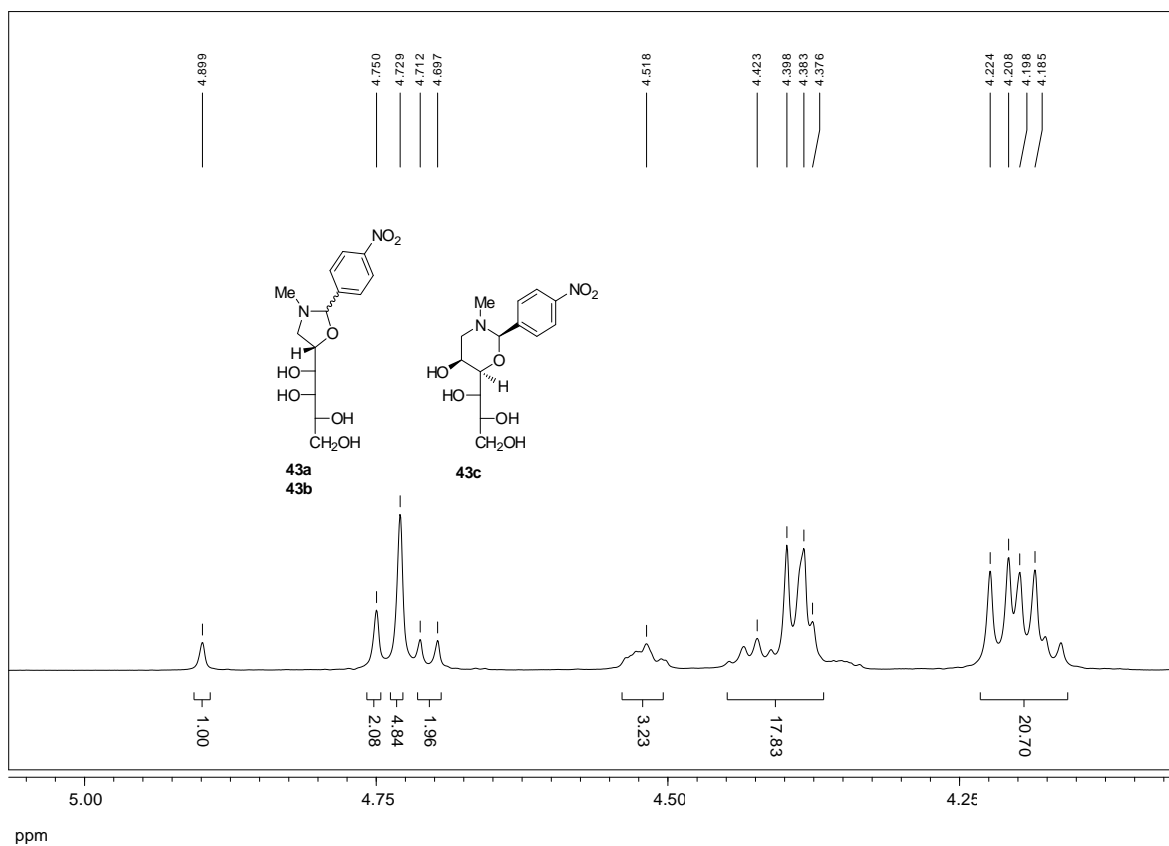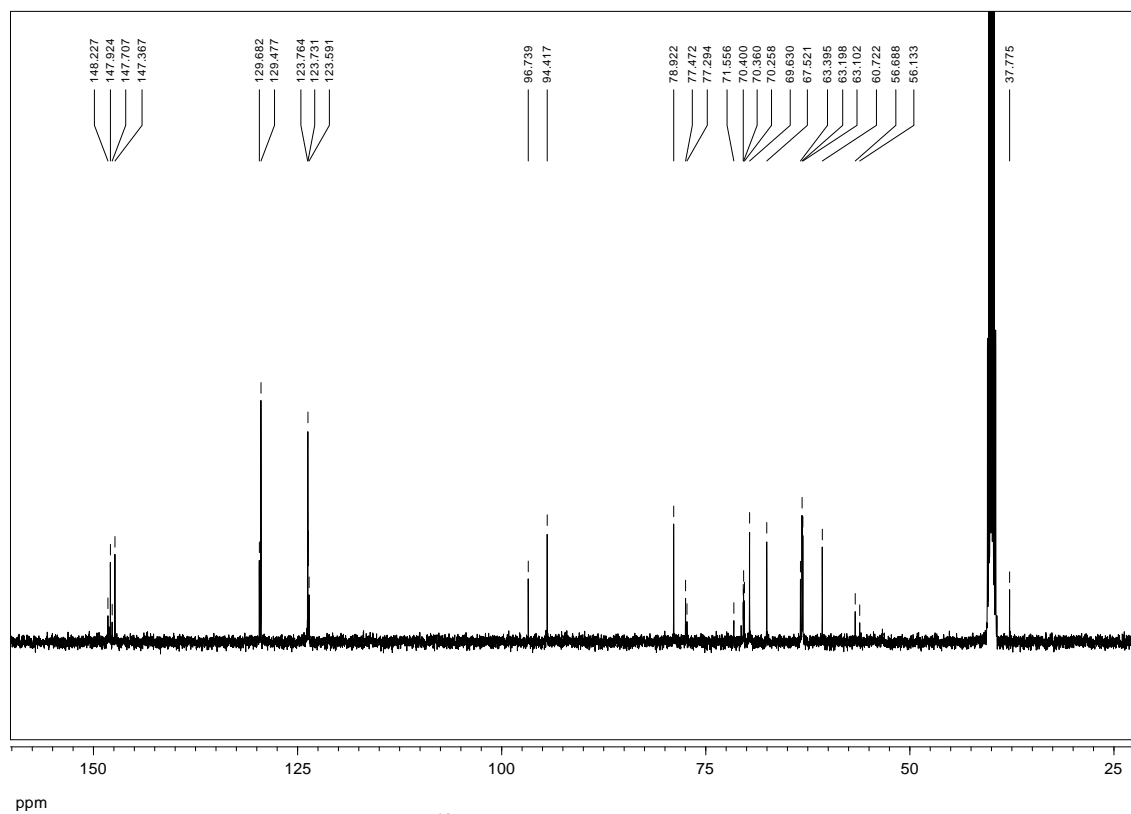



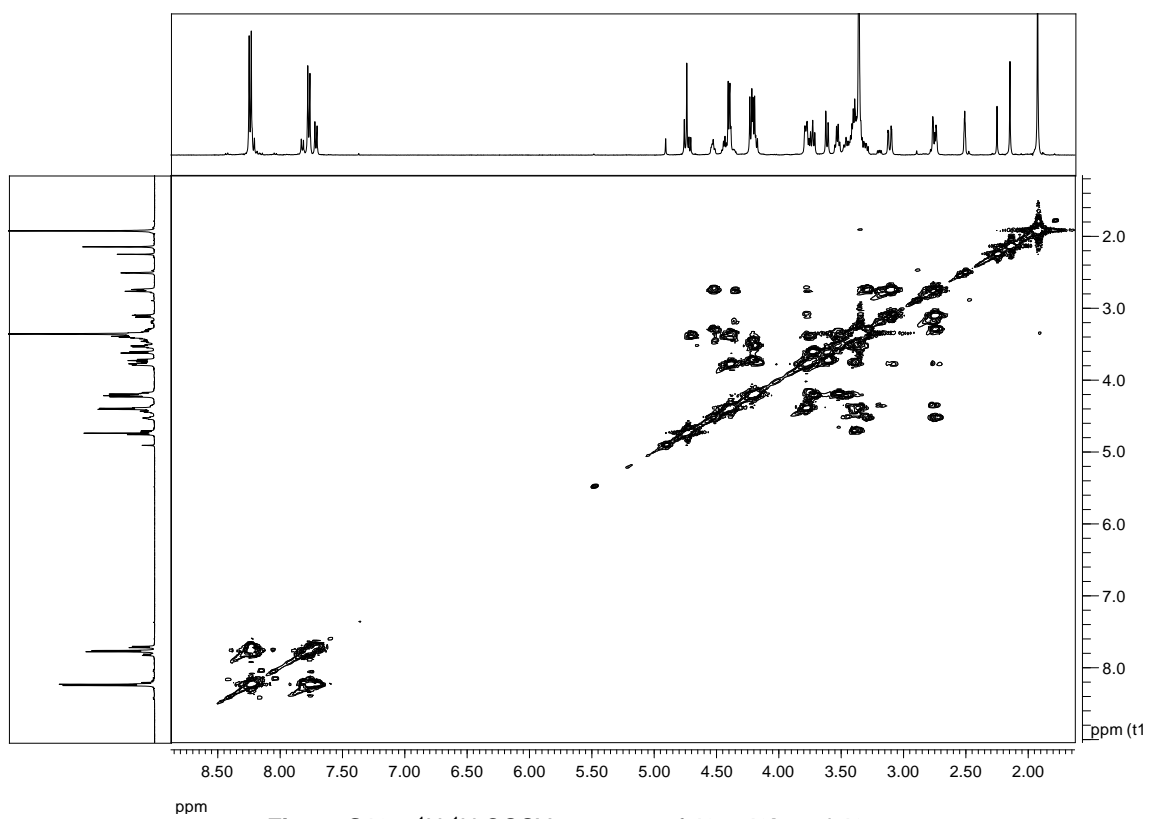

Figure S127.  $^1\text{H}$ - $^1\text{H}$  COSY spectrum of 43a, 43b and 43c.

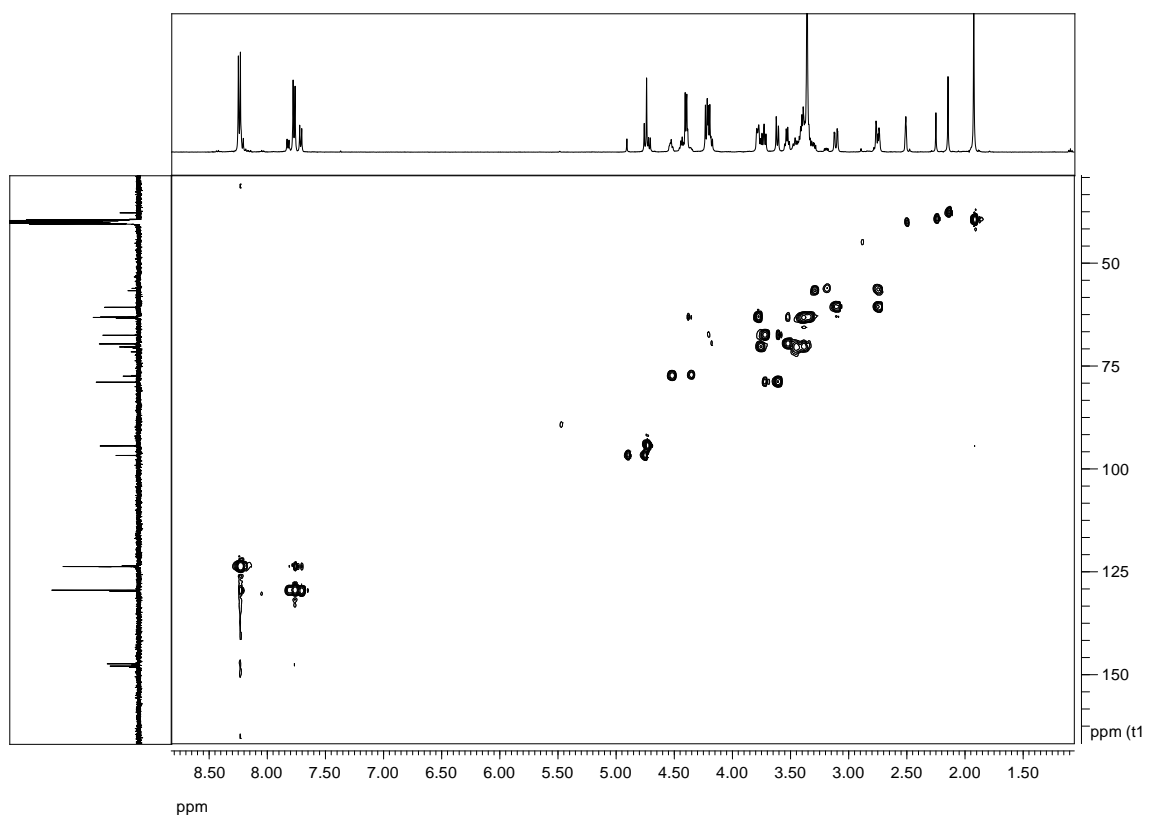

Figure S128. HMQC spectrum of 43a, 43b and 43c.

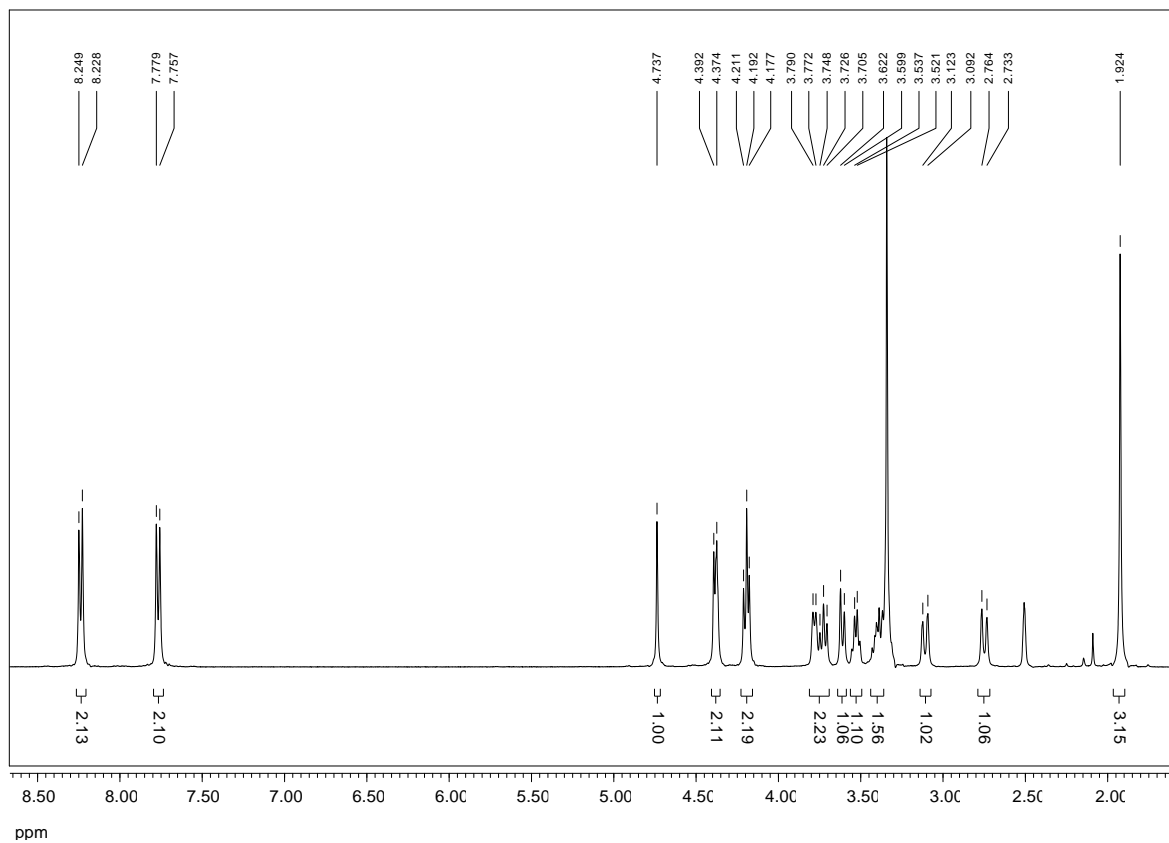

Figure S129. <sup>1</sup>H NMR spectrum of 43c.

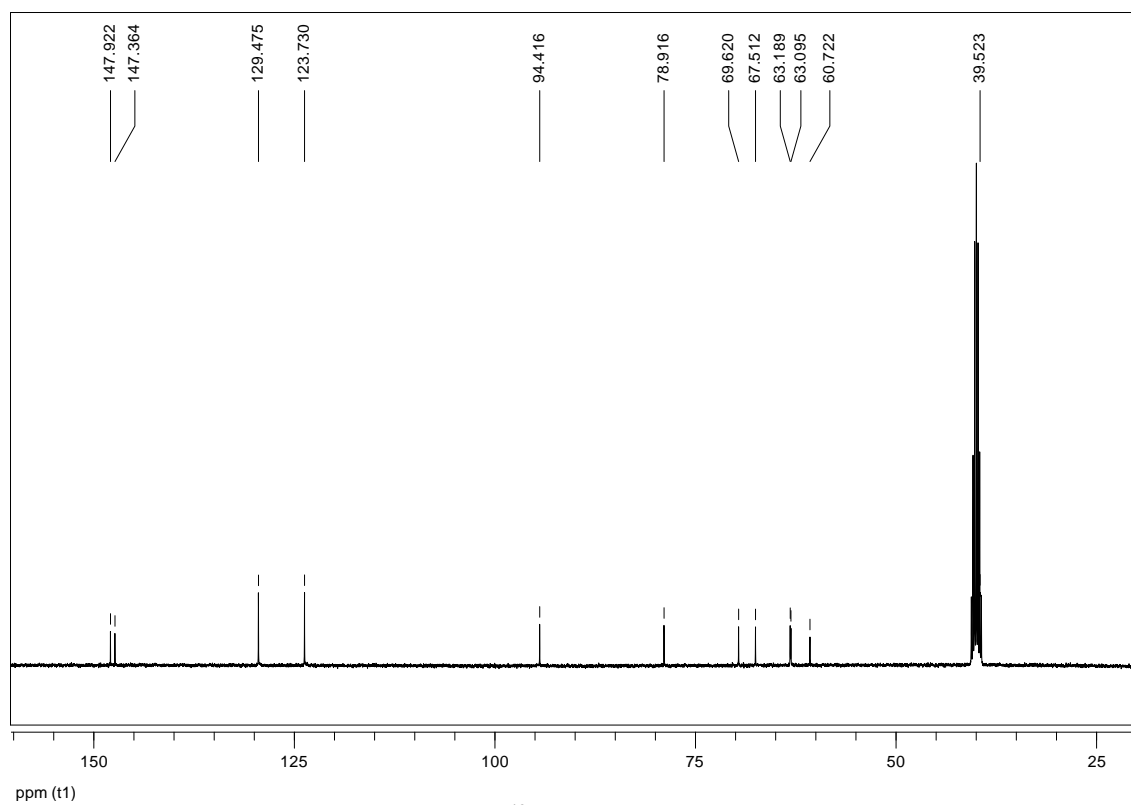

Figure S130. <sup>13</sup>C NMR spectrum of 43c.

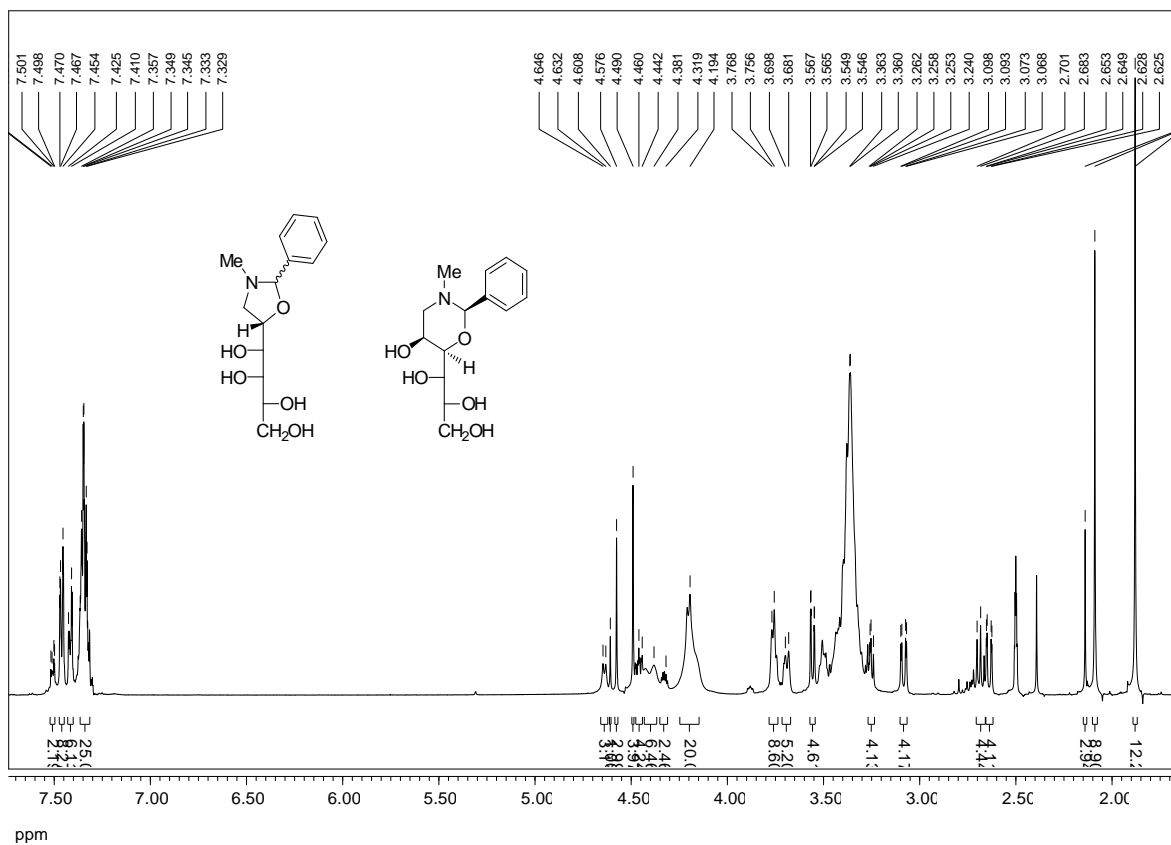

Figure S131. <sup>1</sup>H NMR spectrum of 44a, 44b and 44c.

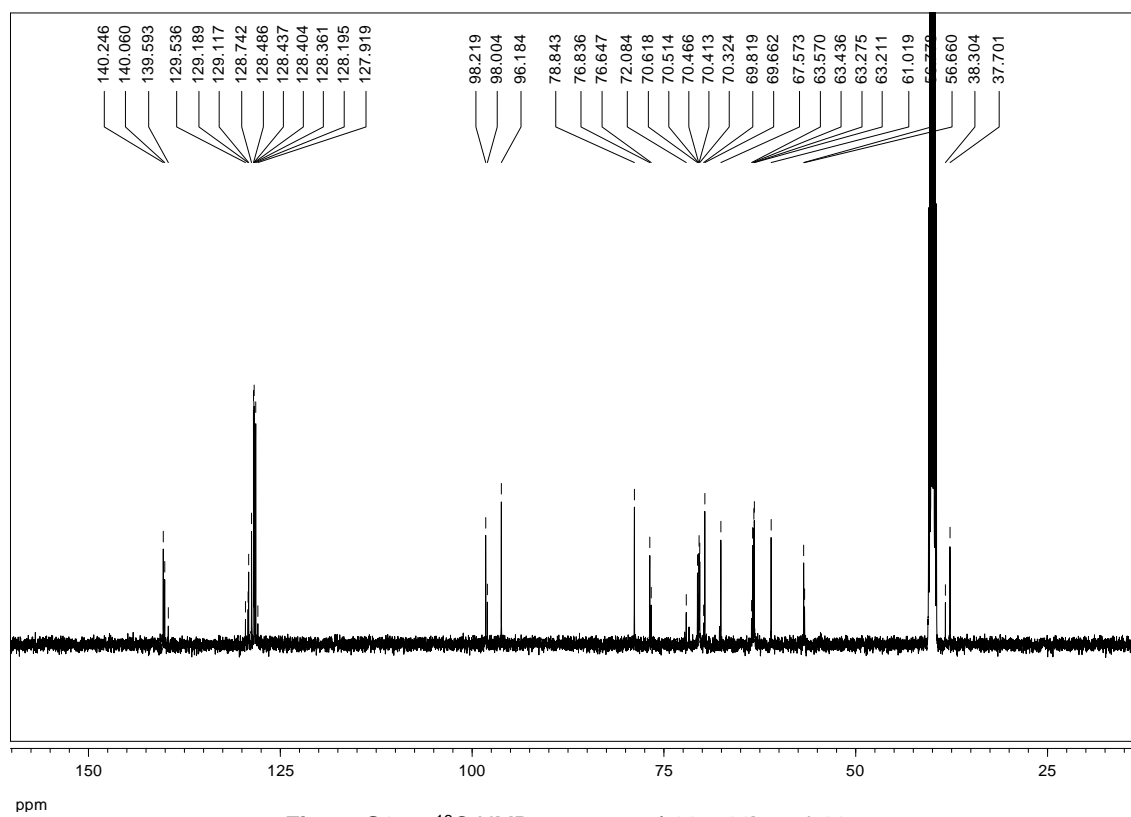

Figure S132. <sup>13</sup>C NMR spectrum of 44a, 44b and 44c.

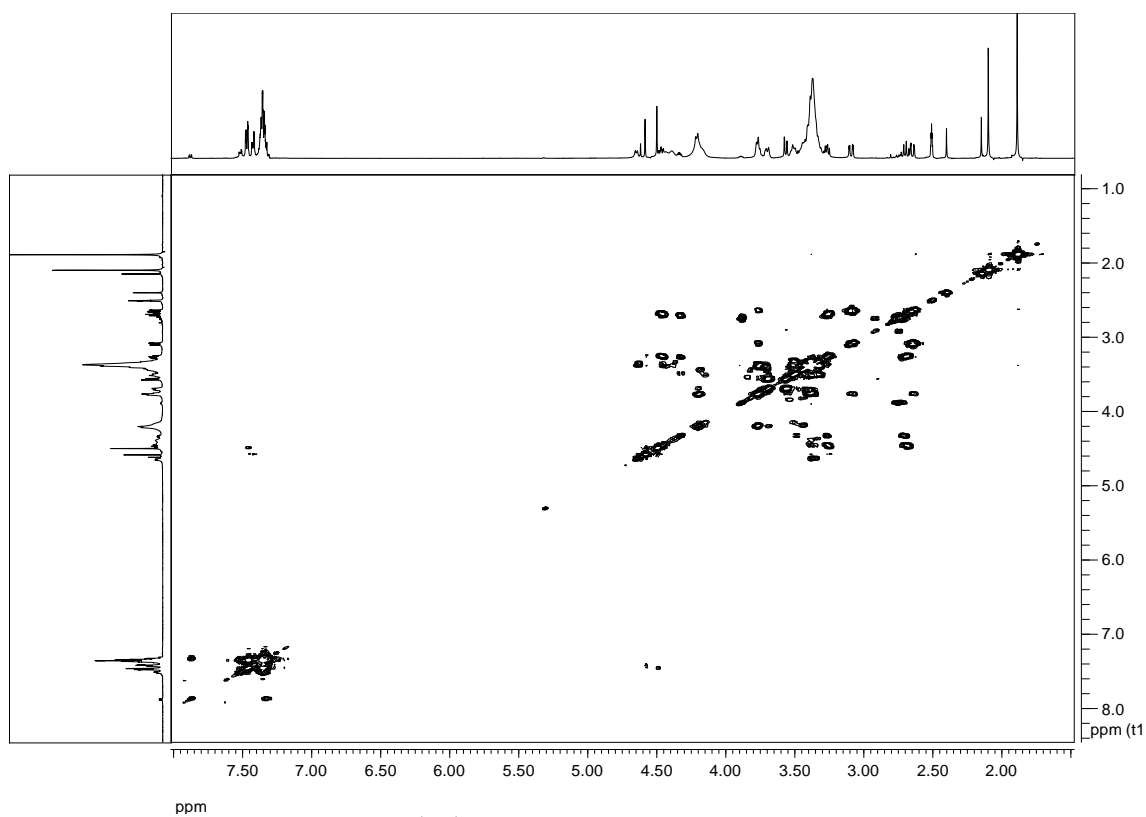

**Figure S133.**  $^1\text{H}$ - $^1\text{H}$  COSY spectrum of **44a**, **44b** and **44c**.

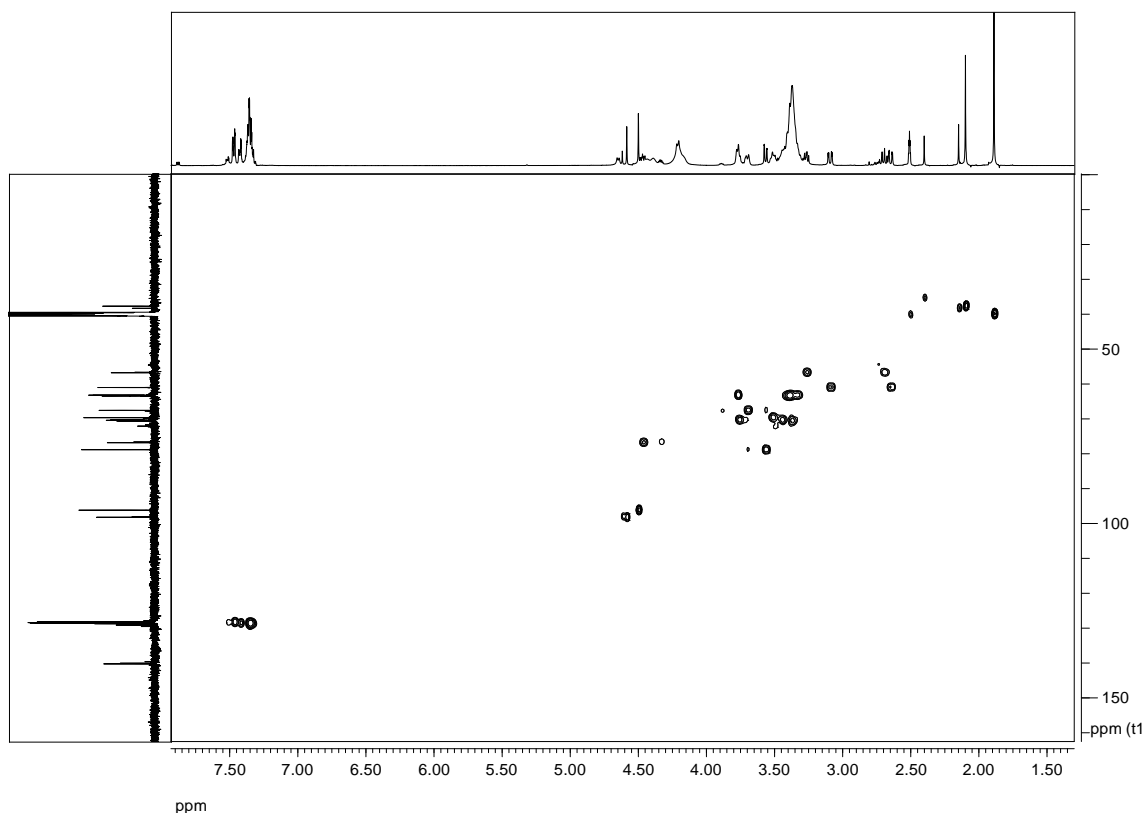

**Figure S134.** HMQC spectrum of **44a**, **44b** and **44c**.



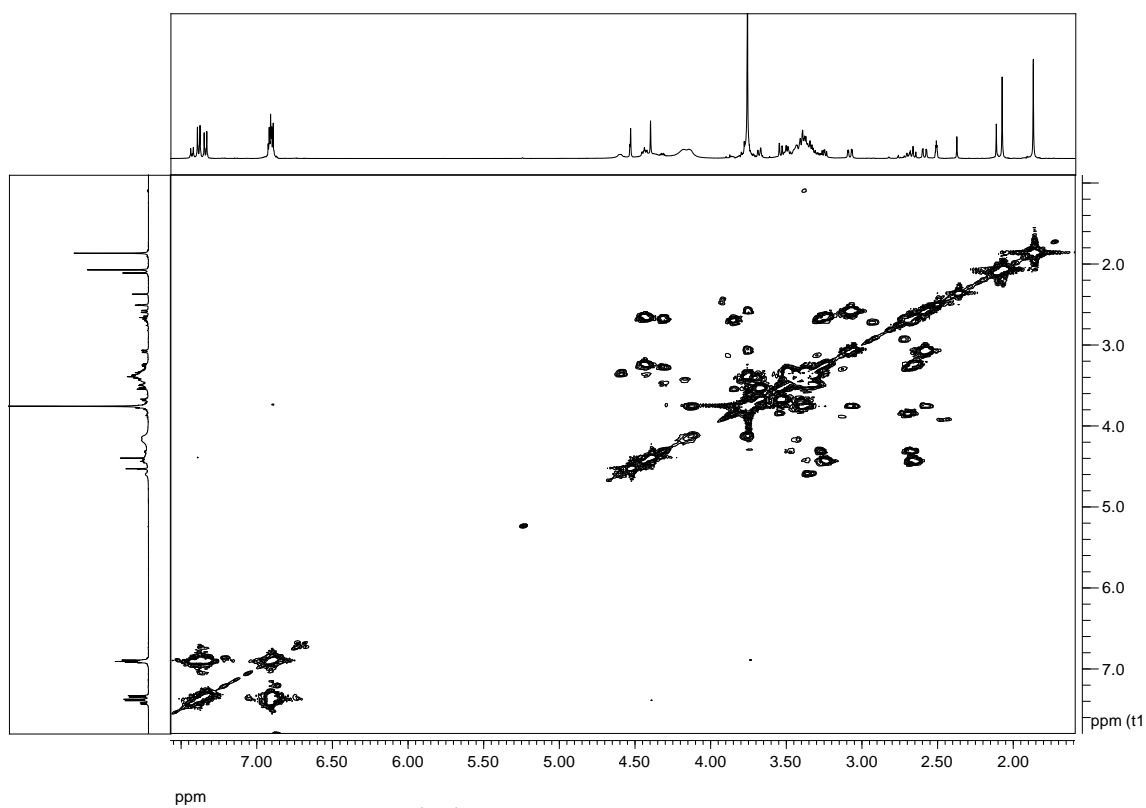

Figure S137.  $^1\text{H}$ - $^1\text{H}$  COSY spectrum of 45a, 45b and 45c.

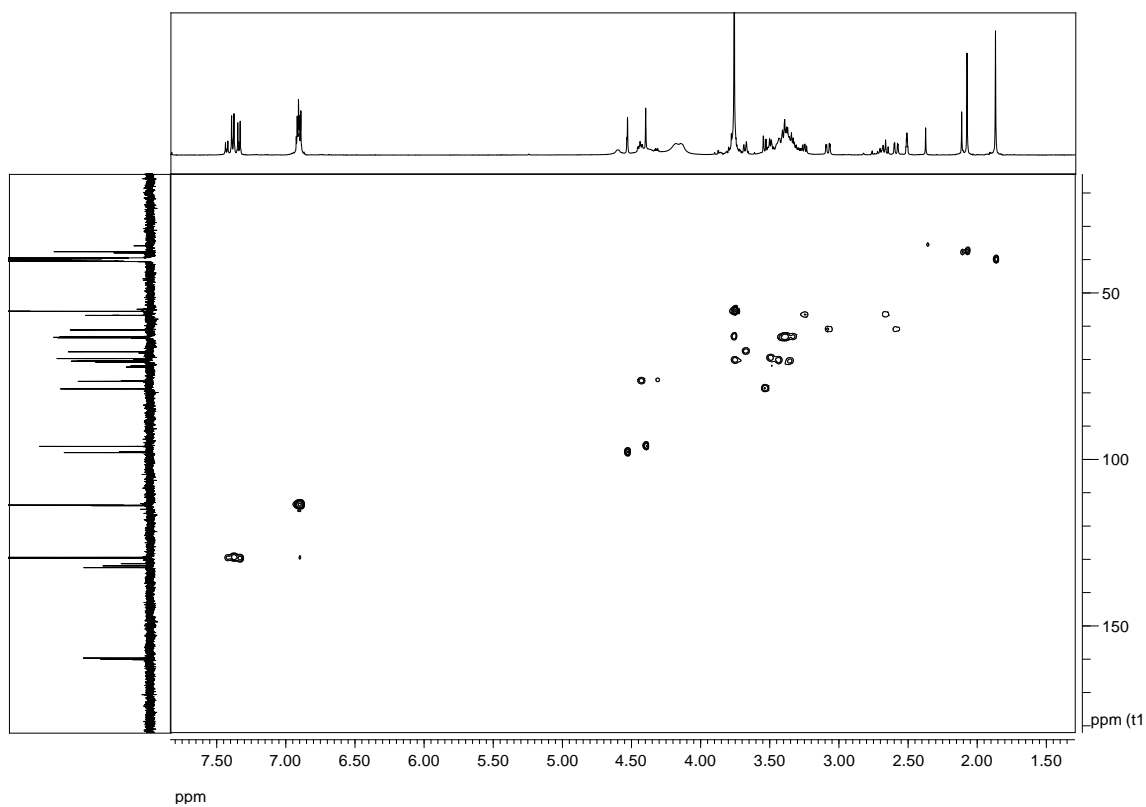

Figure S138. HMQC spectrum of 45a, 45b and 45c.

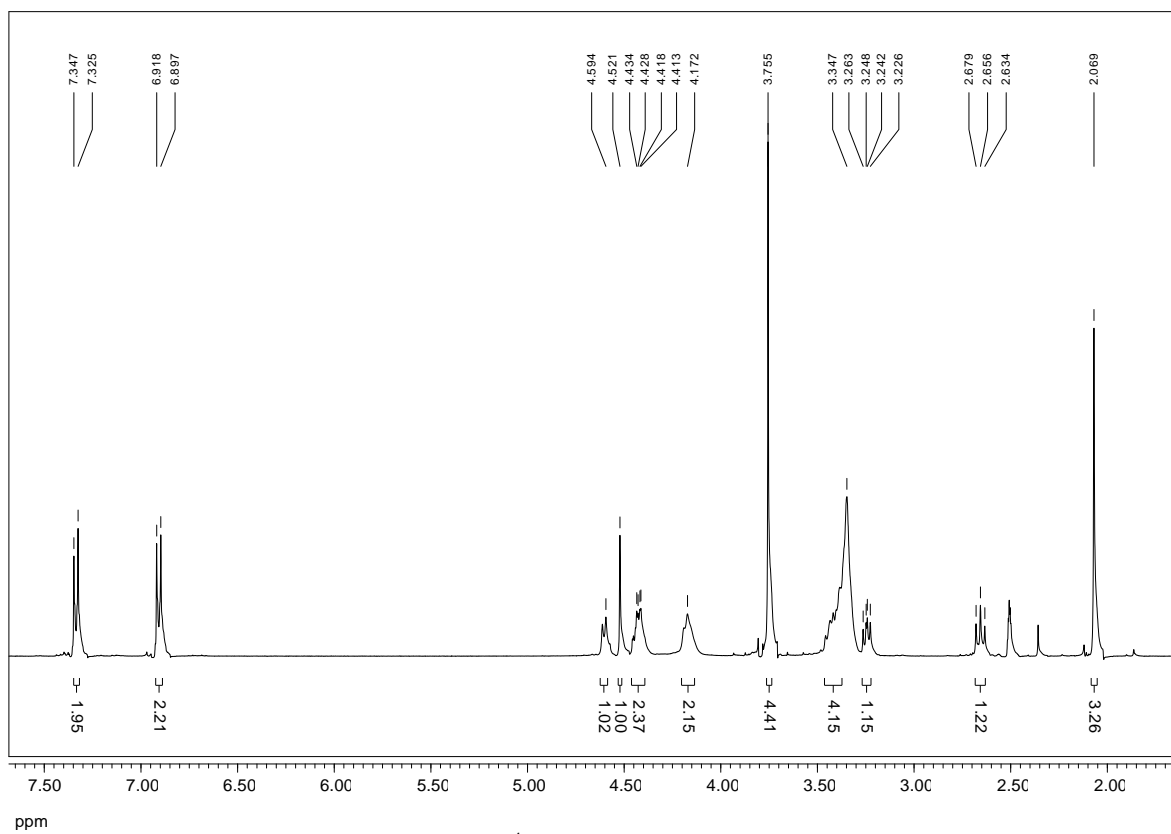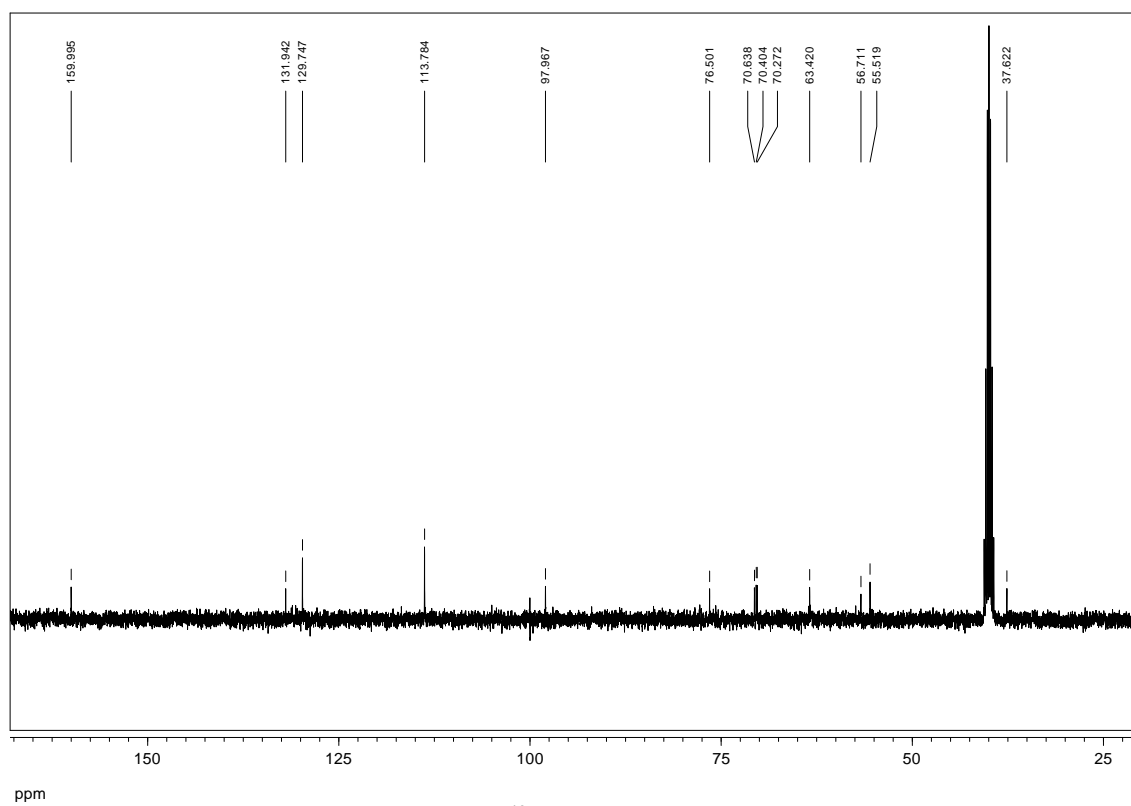

**Structure 21a (<sup>2</sup>E ec-ax H-bond O) (M06-2X, Gas Phase)**

Energy (Hartrees): = - 1220.6352544  
 No imaginary frequencies

Standard orientation:

| Center Number | Atomic Number | Atomic Type | Coordinates (Angstroms) |           |           |
|---------------|---------------|-------------|-------------------------|-----------|-----------|
|               |               |             | X                       | Y         | Z         |
| 1             | 6             | 0           | -1.990879               | 0.532992  | 0.681353  |
| 2             | 6             | 0           | -2.062913               | -0.842614 | 0.462777  |
| 3             | 6             | 0           | -3.272682               | -1.444555 | 0.145860  |
| 4             | 6             | 0           | -4.404543               | -0.649173 | 0.063115  |
| 5             | 6             | 0           | -4.373383               | 0.716548  | 0.296897  |
| 6             | 6             | 0           | -3.154376               | 1.299397  | 0.609643  |
| 7             | 1             | 0           | -1.170343               | -1.446938 | 0.564555  |
| 8             | 1             | 0           | -3.355391               | -2.508374 | -0.029092 |
| 9             | 1             | 0           | -5.288339               | 1.289600  | 0.238016  |
| 10            | 1             | 0           | -3.108471               | 2.365127  | 0.807317  |
| 11            | 6             | 0           | -0.657381               | 1.218831  | 0.951141  |
| 12            | 1             | 0           | -0.825884               | 2.075105  | 1.613370  |
| 13            | 7             | 0           | 0.052044                | 1.665826  | -0.244014 |
| 14            | 8             | 0           | 0.239868                | 0.320478  | 1.567309  |
| 15            | 6             | 0           | 1.241162                | -0.106663 | 0.618243  |
| 16            | 6             | 0           | 0.776629                | 0.490941  | -0.707800 |
| 17            | 1             | 0           | 1.611033                | 0.776032  | -1.345190 |
| 18            | 1             | 0           | 0.143780                | -0.214163 | -1.269113 |
| 19            | 1             | 0           | 1.252693                | -1.198011 | 0.613713  |
| 20            | 6             | 0           | 2.591084                | 0.441783  | 1.093925  |
| 21            | 1             | 0           | 2.688381                | 1.481068  | 0.744937  |
| 22            | 6             | 0           | 3.817965                | -0.349626 | 0.645130  |
| 23            | 1             | 0           | 3.718673                | -1.375458 | 1.027701  |
| 24            | 6             | 0           | 4.012780                | -0.416584 | -0.867205 |
| 25            | 1             | 0           | 3.955179                | 0.594557  | -1.283333 |
| 26            | 6             | 0           | 5.359727                | -1.019501 | -1.228143 |
| 27            | 1             | 0           | 5.504464                | -0.938157 | -2.311272 |
| 28            | 1             | 0           | 6.155482                | -0.493321 | -0.697582 |
| 29            | 8             | 0           | 2.661924                | 0.401375  | 2.509273  |
| 30            | 1             | 0           | 1.788901                | 0.643738  | 2.836880  |
| 31            | 8             | 0           | 4.965894                | 0.271656  | 1.189489  |
| 32            | 1             | 0           | 4.761183                | 0.446079  | 2.114771  |
| 33            | 8             | 0           | 2.979969                | -1.187362 | -1.460679 |
| 34            | 1             | 0           | 3.259207                | -2.106340 | -1.365073 |
| 35            | 8             | 0           | 5.276690                | -2.386059 | -0.836723 |
| 36            | 1             | 0           | 6.105721                | -2.822715 | -1.037128 |
| 37            | 6             | 0           | -0.732560               | 2.370781  | -1.245638 |
| 38            | 1             | 0           | -1.475482               | 1.708496  | -1.718922 |
| 39            | 1             | 0           | -1.288068               | 3.162030  | -0.732089 |
| 40            | 6             | 0           | 0.162227                | 2.992266  | -2.309580 |
| 41            | 1             | 0           | -0.428926               | 3.611875  | -2.985683 |
| 42            | 1             | 0           | 0.926937                | 3.613943  | -1.840491 |
| 43            | 1             | 0           | 0.658049                | 2.226351  | -2.908765 |
| 44            | 7             | 0           | -5.696536               | -1.282596 | -0.273307 |
| 45            | 8             | 0           | -6.670807               | -0.565827 | -0.331321 |
| 46            | 8             | 0           | -5.697847               | -2.477017 | -0.471673 |

**Structure 21a (<sup>2</sup>E ec-ax H-bond N) (M06-2X, Gas Phase)**

Energy (Hartrees): = - 1220.6376728  
 No imaginary frequencies

Standard orientation:

| Center Number | Atomic Number | Atomic Type | Coordinates (Angstroms) |           |           |
|---------------|---------------|-------------|-------------------------|-----------|-----------|
|               |               |             | X                       | Y         | Z         |
| 1             | 6             | 0           | 1.556364                | 0.130660  | -0.565912 |
| 2             | 6             | 0           | 1.763097                | -0.784569 | 0.465758  |
| 3             | 6             | 0           | 3.035537                | -1.271616 | 0.732350  |
| 4             | 6             | 0           | 4.087674                | -0.836053 | -0.056715 |
| 5             | 6             | 0           | 3.913619                | 0.052062  | -1.106661 |
| 6             | 6             | 0           | 2.635453                | 0.528752  | -1.356146 |
| 7             | 1             | 0           | 0.916615                | -1.138101 | 1.041797  |
| 8             | 1             | 0           | 3.221890                | -1.983061 | 1.525024  |
| 9             | 1             | 0           | 4.765399                | 0.345196  | -1.704679 |
| 10            | 1             | 0           | 2.475063                | 1.214195  | -2.181604 |
| 11            | 6             | 0           | 0.173274                | 0.713351  | -0.826894 |
| 12            | 1             | 0           | 0.033860                | 0.839706  | -1.905822 |
| 13            | 7             | 0           | -0.087157               | 1.995559  | -0.159749 |
| 14            | 8             | 0           | -0.827531               | -0.134191 | -0.321503 |
| 15            | 6             | 0           | -1.358995               | 0.407001  | 0.905556  |
| 16            | 6             | 0           | -0.460781               | 1.609455  | 1.200559  |



|    |   |   |           |           |           |
|----|---|---|-----------|-----------|-----------|
| 17 | 1 | 0 | -1.010573 | 2.412607  | 1.691181  |
| 18 | 1 | 0 | 0.411878  | 1.334031  | 1.810958  |
| 19 | 1 | 0 | -1.301670 | -0.370020 | 1.665489  |
| 20 | 6 | 0 | -2.820111 | 0.811027  | 0.705317  |
| 21 | 1 | 0 | -3.280633 | 0.935040  | 1.693694  |
| 22 | 6 | 0 | -3.652689 | -0.198988 | -0.089906 |
| 23 | 1 | 0 | -3.165511 | -0.359848 | -1.059272 |
| 24 | 6 | 0 | -3.839099 | -1.549719 | 0.599774  |
| 25 | 1 | 0 | -4.346004 | -1.384872 | 1.555186  |
| 26 | 6 | 0 | -4.684218 | -2.475787 | -0.260066 |
| 27 | 1 | 0 | -4.880275 | -3.395257 | 0.302157  |
| 28 | 1 | 0 | -5.624506 | -1.982962 | -0.520627 |
| 29 | 8 | 0 | -2.941896 | 2.068501  | 0.045237  |
| 30 | 1 | 0 | -2.118924 | 2.233042  | -0.440231 |
| 31 | 8 | 0 | -4.949624 | 0.340395  | -0.266952 |
| 32 | 1 | 0 | -4.815189 | 1.256990  | -0.532745 |
| 33 | 8 | 0 | -2.599534 | -2.169660 | 0.885192  |
| 34 | 1 | 0 | -2.226967 | -2.422291 | 0.031384  |
| 35 | 8 | 0 | -3.897523 | -2.750742 | -1.414006 |
| 36 | 1 | 0 | -4.358262 | -3.388400 | -1.960744 |
| 37 | 6 | 0 | 0.933338  | 3.029182  | -0.278704 |
| 38 | 1 | 0 | 1.857540  | 2.742183  | 0.245702  |
| 39 | 1 | 0 | 1.179485  | 3.125528  | -1.340643 |
| 40 | 6 | 0 | 0.425171  | 4.364995  | 0.247659  |
| 41 | 1 | 0 | 1.152794  | 5.151752  | 0.043338  |
| 42 | 1 | 0 | -0.519659 | 4.628038  | -0.231708 |
| 43 | 1 | 0 | 0.266001  | 4.334528  | 1.326912  |
| 44 | 7 | 0 | 5.445881  | -1.349402 | 0.220119  |
| 45 | 8 | 0 | 6.346924  | -0.948646 | -0.482667 |
| 46 | 8 | 0 | 5.570533  | -2.134363 | 1.133055  |

-----

### Structure 21a (<sup>2</sup>E ax-ax) (M06-2X, Gas Phase)

Energy (Hartrees): = - 1220.6382662  
 No imaginary frequencies

Standard orientation:

| Center<br>Number | Atomic<br>Number | Atomic<br>Type | Coordinates (Angstroms) |           |           |
|------------------|------------------|----------------|-------------------------|-----------|-----------|
|                  |                  |                | X                       | Y         | Z         |
| 1                | 6                | 0              | -1.902580               | 0.802265  | 0.327153  |
| 2                | 6                | 0              | -2.191533               | -0.161383 | 1.291632  |
| 3                | 6                | 0              | -3.316465               | -0.964675 | 1.167555  |
| 4                | 6                | 0              | -4.138065               | -0.780535 | 0.067490  |
| 5                | 6                | 0              | -3.876552               | 0.169608  | -0.908184 |
| 6                | 6                | 0              | -2.747268               | 0.963474  | -0.770813 |
| 7                | 1                | 0              | -1.521321               | -0.281583 | 2.133347  |
| 8                | 1                | 0              | -3.562780               | -1.723476 | 1.897270  |
| 9                | 1                | 0              | -4.548100               | 0.266634  | -1.750055 |
| 10               | 1                | 0              | -2.496433               | 1.701824  | -1.522511 |
| 11               | 6                | 0              | -0.683202               | 1.698218  | 0.491080  |
| 12               | 1                | 0              | -0.974400               | 2.628955  | 0.983579  |
| 13               | 7                | 0              | -0.032412               | 1.954331  | -0.772019 |
| 14               | 8                | 0              | 0.291827                | 1.071198  | 1.322937  |
| 15               | 6                | 0              | 1.093978                | 0.234375  | 0.470637  |
| 16               | 6                | 0              | 0.747575                | 0.721456  | -0.961749 |
| 17               | 1                | 0              | 1.628163                | 0.913645  | -1.571573 |
| 18               | 1                | 0              | 0.144183                | -0.025053 | -1.476841 |
| 19               | 1                | 0              | 0.798068                | -0.807926 | 0.620131  |
| 20               | 6                | 0              | 2.546326                | 0.440939  | 0.902687  |
| 21               | 1                | 0              | 2.930743                | 1.367730  | 0.447886  |
| 22               | 6                | 0              | 3.504928                | -0.698232 | 0.562963  |
| 23               | 1                | 0              | 3.125158                | -1.613552 | 1.038894  |
| 24               | 6                | 0              | 3.670813                | -0.964836 | -0.930092 |
| 25               | 1                | 0              | 3.937403                | -0.030357 | -1.434722 |
| 26               | 6                | 0              | 4.761013                | -1.992162 | -1.188902 |
| 27               | 1                | 0              | 4.932041                | -2.061311 | -2.268824 |
| 28               | 1                | 0              | 5.678599                | -1.697270 | -0.675907 |
| 29               | 8                | 0              | 2.625268                | 0.538153  | 2.316082  |
| 30               | 1                | 0              | 1.889944                | 1.091529  | 2.600383  |
| 31               | 8                | 0              | 4.782460                | -0.368593 | 1.071188  |
| 32               | 1                | 0              | 4.640735                | -0.060772 | 1.973036  |
| 33               | 8                | 0              | 2.451580                | -1.424281 | -1.486688 |
| 34               | 1                | 0              | 2.423512                | -2.370894 | -1.299065 |
| 35               | 8                | 0              | 4.245171                | -3.219863 | -0.684545 |
| 36               | 1                | 0              | 4.873553                | -3.922369 | -0.857723 |
| 37               | 6                | 0              | 0.786466                | 3.175976  | -0.724175 |
| 38               | 1                | 0              | 1.344764                | 3.249367  | 0.221242  |
| 39               | 1                | 0              | 1.521340                | 3.105450  | -1.528569 |
| 40               | 6                | 0              | -0.068665               | 4.416873  | -0.936308 |
| 41               | 1                | 0              | 0.551309                | 5.315486  | -0.931806 |
| 42               | 1                | 0              | -0.587181               | 4.351351  | -1.894059 |
| 43               | 1                | 0              | -0.820101               | 4.530178  | -0.151378 |
| 44               | 7                | 0              | -5.335958               | -1.634182 | -0.076496 |
| 45               | 8                | 0              | -6.033402               | -1.459235 | -1.050961 |

46 8 0 -5.544308 -2.454479 0.789616

### Structure 21a (E<sub>2</sub> ec-ec) (M06-2X, Gas Phase)

Energy (Hartrees): = - 1220.6356596  
No imaginary frequencies

Standard orientation:

| Center Number | Atomic Number | Atomic Type | Coordinates (Angstroms) |           |           |
|---------------|---------------|-------------|-------------------------|-----------|-----------|
|               |               |             | X                       | Y         | Z         |
| 1             | 6             | 0           | 2.108162                | -0.070577 | -0.396683 |
| 2             | 6             | 0           | 2.528493                | -0.068457 | 0.933460  |
| 3             | 6             | 0           | 3.867606                | -0.235371 | 1.242208  |
| 4             | 6             | 0           | 4.768259                | -0.401543 | 0.197531  |
| 5             | 6             | 0           | 4.381422                | -0.408718 | -1.130717 |
| 6             | 6             | 0           | 3.031468                | -0.242213 | -1.421241 |
| 7             | 1             | 0           | 1.790089                | 0.074057  | 1.712606  |
| 8             | 1             | 0           | 4.228175                | -0.237672 | 2.261385  |
| 9             | 1             | 0           | 5.125606                | -0.543069 | -1.903365 |
| 10            | 1             | 0           | 2.697646                | -0.244934 | -2.453032 |
| 11            | 6             | 0           | 0.643428                | 0.135308  | -0.690227 |
| 12            | 1             | 0           | 0.468061                | 0.075999  | -1.783698 |
| 13            | 7             | 0           | 0.142895                | 1.380021  | -0.141539 |
| 14            | 8             | 0           | -0.118559               | -0.855392 | -0.032552 |
| 15            | 6             | 0           | -1.415010               | -0.307297 | 0.288845  |
| 16            | 6             | 0           | -1.301093               | 1.175852  | -0.084233 |
| 17            | 1             | 0           | -1.772844               | 1.365031  | -1.066671 |
| 18            | 1             | 0           | -1.771127               | 1.822705  | 0.648807  |
| 19            | 1             | 0           | -1.566982               | -0.450683 | 1.361030  |
| 20            | 6             | 0           | -2.439713               | -1.125517 | -0.501350 |
| 21            | 1             | 0           | -2.407779               | -0.812033 | -1.556847 |
| 22            | 6             | 0           | -3.893965               | -1.080648 | -0.032964 |
| 23            | 1             | 0           | -3.928375               | -1.420227 | 1.011650  |
| 24            | 6             | 0           | -4.554453               | 0.293342  | -0.113289 |
| 25            | 1             | 0           | -4.363661               | 0.735532  | -1.096281 |
| 26            | 6             | 0           | -6.055979               | 0.196366  | 0.102745  |
| 27            | 1             | 0           | -6.500272               | 1.184045  | -0.063759 |
| 28            | 1             | 0           | -6.484883               | -0.535112 | -0.584242 |
| 29            | 8             | 0           | -2.104113               | -2.501699 | -0.405159 |
| 30            | 1             | 0           | -1.149228               | -2.564212 | -0.516954 |
| 31            | 8             | 0           | -4.639153               | -1.952001 | -0.861042 |
| 32            | 1             | 0           | -4.126679               | -2.765684 | -0.923051 |
| 33            | 8             | 0           | -3.999757               | 1.159158  | 0.861522  |
| 34            | 1             | 0           | -4.449938               | 0.938888  | 1.686552  |
| 35            | 8             | 0           | -6.212046               | -0.198617 | 1.461731  |
| 36            | 1             | 0           | -7.144779               | -0.291643 | 1.660259  |
| 37            | 6             | 0           | 0.561192                | 2.554984  | -0.891552 |
| 38            | 1             | 0           | 1.654051                | 2.546574  | -0.937208 |
| 39            | 1             | 0           | 0.187346                | 2.505048  | -1.930813 |
| 40            | 6             | 0           | 0.086148                | 3.840198  | -0.229825 |
| 41            | 1             | 0           | 0.496623                | 4.708503  | -0.747223 |
| 42            | 1             | 0           | -1.002371               | 3.920994  | -0.250492 |
| 43            | 1             | 0           | 0.413847                | 3.865449  | 0.810928  |
| 44            | 7             | 0           | 6.201830                | -0.575653 | 0.516989  |
| 45            | 8             | 0           | 6.966405                | -0.726301 | -0.409921 |
| 46            | 8             | 0           | 6.519546                | -0.555447 | 1.684921  |

### Structure 21a (<sup>2</sup>E ec-ax H-bond O) (M06-2X, Benzene)

Energy (Hartrees): = - 1220.6575388  
No imaginary frequencies

Standard orientation:

| Center Number | Atomic Number | Atomic Type | Coordinates (Angstroms) |           |           |
|---------------|---------------|-------------|-------------------------|-----------|-----------|
|               |               |             | X                       | Y         | Z         |
| 1             | 6             | 0           | -1.993919               | 0.528246  | 0.675570  |
| 2             | 6             | 0           | -2.066166               | -0.846598 | 0.450668  |
| 3             | 6             | 0           | -3.276115               | -1.447499 | 0.132927  |
| 4             | 6             | 0           | -4.408402               | -0.651229 | 0.055022  |
| 5             | 6             | 0           | -4.376175               | 0.714747  | 0.291713  |
| 6             | 6             | 0           | -3.157069               | 1.296200  | 0.605415  |
| 7             | 1             | 0           | -1.175011               | -1.454253 | 0.546083  |
| 8             | 1             | 0           | -3.352454               | -2.511298 | -0.045599 |
| 9             | 1             | 0           | -5.287390               | 1.294153  | 0.235350  |
| 10            | 1             | 0           | -3.111429               | 2.361217  | 0.806777  |
| 11            | 6             | 0           | -0.662226               | 1.213376  | 0.959402  |
| 12            | 1             | 0           | -0.836207               | 2.059698  | 1.632194  |
| 13            | 7             | 0           | 0.054760                | 1.674950  | -0.225320 |
| 14            | 8             | 0           | 0.233342                | 0.306775  | 1.568829  |
| 15            | 6             | 0           | 1.234795                | -0.114518 | 0.615895  |
| 16            | 6             | 0           | 0.777653                | 0.504079  | -0.703188 |

|    |   |   |           |           |           |
|----|---|---|-----------|-----------|-----------|
| 17 | 1 | 0 | 1.615466  | 0.799026  | -1.331722 |
| 18 | 1 | 0 | 0.144534  | -0.189752 | -1.277246 |
| 19 | 1 | 0 | 1.239950  | -1.205727 | 0.597591  |
| 20 | 6 | 0 | 2.585661  | 0.421606  | 1.103559  |
| 21 | 1 | 0 | 2.686029  | 1.467328  | 0.775570  |
| 22 | 6 | 0 | 3.814060  | -0.362706 | 0.644925  |
| 23 | 1 | 0 | 3.716078  | -1.392821 | 1.016092  |
| 24 | 6 | 0 | 4.010968  | -0.412463 | -0.868686 |
| 25 | 1 | 0 | 3.945966  | 0.601550  | -1.276013 |
| 26 | 6 | 0 | 5.359382  | -1.002689 | -1.242524 |
| 27 | 1 | 0 | 5.492272  | -0.915319 | -2.326641 |
| 28 | 1 | 0 | 6.160631  | -0.471066 | -0.725146 |
| 29 | 8 | 0 | 2.651034  | 0.355960  | 2.520389  |
| 30 | 1 | 0 | 1.780527  | 0.610839  | 2.846684  |
| 31 | 8 | 0 | 4.960965  | 0.253784  | 1.201640  |
| 32 | 1 | 0 | 4.752982  | 0.412903  | 2.129152  |
| 33 | 8 | 0 | 2.982187  | -1.186115 | -1.468285 |
| 34 | 1 | 0 | 3.264344  | -2.104247 | -1.369116 |
| 35 | 8 | 0 | 5.299723  | -2.371840 | -0.854852 |
| 36 | 1 | 0 | 6.105679  | -2.809677 | -1.137530 |
| 37 | 6 | 0 | -0.718105 | 2.403882  | -1.220207 |
| 38 | 1 | 0 | -1.464142 | 1.756979  | -1.709016 |
| 39 | 1 | 0 | -1.266685 | 3.193749  | -0.697622 |
| 40 | 6 | 0 | 0.188681  | 3.030543  | -2.269918 |
| 41 | 1 | 0 | -0.391344 | 3.677146  | -2.931137 |
| 42 | 1 | 0 | 0.965814  | 3.628771  | -1.789195 |
| 43 | 1 | 0 | 0.669741  | 2.270569  | -2.889226 |
| 44 | 7 | 0 | -5.698192 | -1.281695 | -0.284036 |
| 45 | 8 | 0 | -6.673687 | -0.565542 | -0.353401 |
| 46 | 8 | 0 | -5.707248 | -2.478323 | -0.476597 |

-----

**Structure 21a (<sup>2</sup>E ec-ax H-bond N) (M06-2X, Benzene)**

Energy (Hartrees): = - 1220.6606267  
 No imaginary frequencies

Standard orientation:

| Center<br>Number | Atomic<br>Number | Atomic<br>Type | Coordinates (Angstroms) |           |           |
|------------------|------------------|----------------|-------------------------|-----------|-----------|
|                  |                  |                | X                       | Y         | Z         |
| 1                | 6                | 0              | -1.569811               | 0.138539  | 0.549999  |
| 2                | 6                | 0              | -1.783926               | -0.765951 | -0.489966 |
| 3                | 6                | 0              | -3.056165               | -1.256899 | -0.747507 |
| 4                | 6                | 0              | -4.101011               | -0.838251 | 0.061404  |
| 5                | 6                | 0              | -3.920098               | 0.043335  | 1.116611  |
| 6                | 6                | 0              | -2.642288               | 0.526669  | 1.354742  |
| 7                | 1                | 0              | -0.945370               | -1.107112 | -1.084521 |
| 8                | 1                | 0              | -3.242224               | -1.959543 | -1.548250 |
| 9                | 1                | 0              | -4.762231               | 0.328874  | 1.731831  |
| 10               | 1                | 0              | -2.476520               | 1.207186  | 2.183238  |
| 11               | 6                | 0              | -0.184692               | 0.718822  | 0.806720  |
| 12               | 1                | 0              | -0.044510               | 0.847358  | 1.884897  |
| 13               | 7                | 0              | 0.080855                | 1.998435  | 0.136528  |
| 14               | 8                | 0              | 0.811761                | -0.137275 | 0.301282  |
| 15               | 6                | 0              | 1.367694                | 0.412407  | -0.910538 |
| 16               | 6                | 0              | 0.470057                | 1.610925  | -1.219114 |
| 17               | 1                | 0              | 1.020169                | 2.415140  | -1.707821 |
| 18               | 1                | 0              | -0.394025               | 1.331307  | -1.838881 |
| 19               | 1                | 0              | 1.330311                | -0.358390 | -1.677863 |
| 20               | 6                | 0              | 2.822039                | 0.821348  | -0.674211 |
| 21               | 1                | 0              | 3.298048                | 0.970862  | -1.651885 |
| 22               | 6                | 0              | 3.647887                | -0.200510 | 0.114734  |
| 23               | 1                | 0              | 3.135992                | -0.395018 | 1.064997  |
| 24               | 6                | 0              | 3.875331                | -1.528907 | -0.605666 |
| 25               | 1                | 0              | 4.390062                | -1.331574 | -1.550702 |
| 26               | 6                | 0              | 4.727323                | -2.464030 | 0.236148  |
| 27               | 1                | 0              | 4.945482                | -3.363300 | -0.350221 |
| 28               | 1                | 0              | 5.661315                | -1.969818 | 0.517054  |
| 29               | 8                | 0              | 2.921404                | 2.061140  | 0.024816  |
| 30               | 1                | 0              | 2.064379                | 2.236832  | 0.446697  |
| 31               | 8                | 0              | 4.930263                | 0.356991  | 0.348463  |
| 32               | 1                | 0              | 4.765668                | 1.262373  | 0.636585  |
| 33               | 8                | 0              | 2.650239                | -2.165944 | -0.922829 |
| 34               | 1                | 0              | 2.261998                | -2.427261 | -0.078469 |
| 35               | 8                | 0              | 3.942160                | -2.787577 | 1.378594  |
| 36               | 1                | 0              | 4.405699                | -3.452915 | 1.891637  |
| 37               | 6                | 0              | -0.943147               | 3.031190  | 0.245099  |
| 38               | 1                | 0              | -1.854958               | 2.746767  | -0.301421 |
| 39               | 1                | 0              | -1.210854               | 3.117731  | 1.302225  |
| 40               | 6                | 0              | -0.429924               | 4.371668  | -0.260514 |
| 41               | 1                | 0              | -1.169846               | 5.151612  | -0.070857 |
| 42               | 1                | 0              | 0.498505                | 4.643863  | 0.246353  |
| 43               | 1                | 0              | -0.242066               | 4.351281  | -1.335889 |
| 44               | 7                | 0              | -5.454671               | -1.363974 | -0.199262 |
| 45               | 8                | 0              | -6.339572               | -1.044400 | 0.565063  |

46 8 0 -5.602996 -2.084137 -1.162546

Structure 21a ( $^2E$  ax-ax) (M06-2X, Benzene)

Energy (Hartrees): = - 1220.6603437  
No imaginary frequencies

Standard orientation:

| Center Number | Atomic Number | Atomic Type | Coordinates (Angstroms) |           |           |
|---------------|---------------|-------------|-------------------------|-----------|-----------|
|               |               |             | X                       | Y         | Z         |
| 1             | 6             | 0           | -1.944810               | 0.705847  | 0.348053  |
| 2             | 6             | 0           | -2.235684               | -0.327789 | 1.236156  |
| 3             | 6             | 0           | -3.398057               | -1.073045 | 1.089093  |
| 4             | 6             | 0           | -4.255933               | -0.757997 | 0.047421  |
| 5             | 6             | 0           | -3.992651               | 0.264850  | -0.852884 |
| 6             | 6             | 0           | -2.824942               | 0.994844  | -0.695839 |
| 7             | 1             | 0           | -1.545439               | -0.546809 | 2.040973  |
| 8             | 1             | 0           | -3.643279               | -1.882346 | 1.763070  |
| 9             | 1             | 0           | -4.689819               | 0.470145  | -1.653549 |
| 10            | 1             | 0           | -2.577665               | 1.788296  | -1.390609 |
| 11            | 6             | 0           | -0.697520               | 1.558648  | 0.528161  |
| 12            | 1             | 0           | -0.967992               | 2.488356  | 1.034923  |
| 13            | 7             | 0           | -0.046480               | 1.826226  | -0.731854 |
| 14            | 8             | 0           | 0.263227                | 0.893212  | 1.348984  |
| 15            | 6             | 0           | 1.125320                | 0.128058  | 0.485288  |
| 16            | 6             | 0           | 0.737073                | 0.600162  | -0.937275 |
| 17            | 1             | 0           | 1.596797                | 0.796947  | -1.574119 |
| 18            | 1             | 0           | 0.119594                | -0.153268 | -1.427150 |
| 19            | 1             | 0           | 0.915704                | -0.934322 | 0.632449  |
| 20            | 6             | 0           | 2.563466                | 0.449809  | 0.901147  |
| 21            | 1             | 0           | 2.871826                | 1.398380  | 0.435169  |
| 22            | 6             | 0           | 3.605385                | -0.612048 | 0.556165  |
| 23            | 1             | 0           | 3.311950                | -1.548776 | 1.050696  |
| 24            | 6             | 0           | 3.761212                | -0.882045 | -0.938678 |
| 25            | 1             | 0           | 3.905521                | 0.067509  | -1.464456 |
| 26            | 6             | 0           | 4.948636                | -1.784351 | -1.224662 |
| 27            | 1             | 0           | 5.074791                | -1.865122 | -2.310088 |
| 28            | 1             | 0           | 5.854159                | -1.371483 | -0.774824 |
| 29            | 8             | 0           | 2.648948                | 0.568252  | 2.314037  |
| 30            | 1             | 0           | 1.864678                | 1.051259  | 2.598214  |
| 31            | 8             | 0           | 4.860949                | -0.170656 | 1.039076  |
| 32            | 1             | 0           | 4.707523                | 0.135521  | 1.939867  |
| 33            | 8             | 0           | 2.582821                | -1.483442 | -1.450641 |
| 34            | 1             | 0           | 2.657498                | -2.420931 | -1.231431 |
| 35            | 8             | 0           | 4.612147                | -3.049164 | -0.663621 |
| 36            | 1             | 0           | 5.298212                | -3.681250 | -0.889144 |
| 37            | 6             | 0           | 0.749903                | 3.063727  | -0.688866 |
| 38            | 1             | 0           | 1.277669                | 3.171712  | 0.270269  |
| 39            | 1             | 0           | 1.509033                | 2.991412  | -1.470259 |
| 40            | 6             | 0           | -0.126740               | 4.279027  | -0.949138 |
| 41            | 1             | 0           | 0.468652                | 5.194730  | -0.930783 |
| 42            | 1             | 0           | -0.605898               | 4.193483  | -1.926474 |
| 43            | 1             | 0           | -0.911077               | 4.378870  | -0.194023 |
| 44            | 7             | 0           | -5.496148               | -1.540940 | -0.111659 |
| 45            | 8             | 0           | -6.247874               | -1.229389 | -1.010297 |
| 46            | 8             | 0           | -5.692967               | -2.449502 | 0.666340  |

Structure 21a ( $E_2$  ec-ec) (M06-2X, Benzene)

Energy (Hartrees): = - 1220.6580232  
No imaginary frequencies

Standard orientation:

| Center Number | Atomic Number | Atomic Type | Coordinates (Angstroms) |           |           |
|---------------|---------------|-------------|-------------------------|-----------|-----------|
|               |               |             | X                       | Y         | Z         |
| 1             | 6             | 0           | 2.113942                | -0.052468 | -0.404013 |
| 2             | 6             | 0           | 2.529773                | -0.055694 | 0.928020  |
| 3             | 6             | 0           | 3.866697                | -0.229180 | 1.241787  |
| 4             | 6             | 0           | 4.770951                | -0.397776 | 0.199889  |
| 5             | 6             | 0           | 4.388880                | -0.397060 | -1.130509 |
| 6             | 6             | 0           | 3.041388                | -0.221485 | -1.425952 |
| 7             | 1             | 0           | 1.792625                | 0.085394  | 1.708885  |
| 8             | 1             | 0           | 4.217112                | -0.234966 | 2.264625  |
| 9             | 1             | 0           | 5.130180                | -0.533267 | -1.905798 |
| 10            | 1             | 0           | 2.713099                | -0.217841 | -2.459493 |
| 11            | 6             | 0           | 0.649284                | 0.153410  | -0.704287 |
| 12            | 1             | 0           | 0.480046                | 0.102531  | -1.797842 |
| 13            | 7             | 0           | 0.141824                | 1.391679  | -0.145328 |
| 14            | 8             | 0           | -0.110718               | -0.847732 | -0.056993 |
| 15            | 6             | 0           | -1.406681               | -0.306047 | 0.281324  |
| 16            | 6             | 0           | -1.301750               | 1.178350  | -0.085763 |

|    |   |   |           |           |           |
|----|---|---|-----------|-----------|-----------|
| 17 | 1 | 0 | -1.776502 | 1.369558  | -1.065456 |
| 18 | 1 | 0 | -1.770480 | 1.819189  | 0.653515  |
| 19 | 1 | 0 | -1.546237 | -0.455347 | 1.354472  |
| 20 | 6 | 0 | -2.434568 | -1.125789 | -0.503148 |
| 21 | 1 | 0 | -2.406868 | -0.813269 | -1.558408 |
| 22 | 6 | 0 | -3.888298 | -1.088504 | -0.030404 |
| 23 | 1 | 0 | -3.918440 | -1.430698 | 1.013345  |
| 24 | 6 | 0 | -4.557345 | 0.282047  | -0.106945 |
| 25 | 1 | 0 | -4.369246 | 0.728918  | -1.088199 |
| 26 | 6 | 0 | -6.058284 | 0.184506  | 0.108967  |
| 27 | 1 | 0 | -6.499220 | 1.175589  | -0.046409 |
| 28 | 1 | 0 | -6.496385 | -0.531794 | -0.588642 |
| 29 | 8 | 0 | -2.091818 | -2.502815 | -0.407802 |
| 30 | 1 | 0 | -1.139715 | -2.561088 | -0.545283 |
| 31 | 8 | 0 | -4.629539 | -1.966127 | -0.858753 |
| 32 | 1 | 0 | -4.109729 | -2.775430 | -0.920704 |
| 33 | 8 | 0 | -4.004940 | 1.146621  | 0.871773  |
| 34 | 1 | 0 | -4.447242 | 0.913033  | 1.697830  |
| 35 | 8 | 0 | -6.223004 | -0.229090 | 1.461661  |
| 36 | 1 | 0 | -7.159436 | -0.242462 | 1.671542  |
| 37 | 6 | 0 | 0.547736  | 2.576183  | -0.889931 |
| 38 | 1 | 0 | 1.640722  | 2.584288  | -0.931908 |
| 39 | 1 | 0 | 0.177207  | 2.526306  | -1.929682 |
| 40 | 6 | 0 | 0.054742  | 3.851494  | -0.223965 |
| 41 | 1 | 0 | 0.465401  | 4.726883  | -0.730348 |
| 42 | 1 | 0 | -1.034251 | 3.927354  | -0.256701 |
| 43 | 1 | 0 | 0.370010  | 3.874330  | 0.821378  |
| 44 | 7 | 0 | 6.198458  | -0.588202 | 0.524600  |
| 45 | 8 | 0 | 6.963636  | -0.786639 | -0.394319 |
| 46 | 8 | 0 | 6.522205  | -0.535900 | 1.691178  |

-----

**Structure 21a (<sup>2</sup>E ec-ax H-bond O) (M06-2X, DMSO)**

Energy (Hartrees): = - 1220.6617601  
 No imaginary frequencies

Standard orientation:

| Center<br>Number | Atomic<br>Number | Atomic<br>Type | Coordinates (Angstroms) |           |           |
|------------------|------------------|----------------|-------------------------|-----------|-----------|
|                  |                  |                | X                       | Y         | Z         |
| 1                | 6                | 0              | -1.986723               | 0.551956  | 0.675765  |
| 2                | 6                | 0              | -2.042840               | -0.827296 | 0.469914  |
| 3                | 6                | 0              | -3.246712               | -1.445417 | 0.161648  |
| 4                | 6                | 0              | -4.387353               | -0.660971 | 0.073168  |
| 5                | 6                | 0              | -4.370253               | 0.709315  | 0.290973  |
| 6                | 6                | 0              | -3.157391               | 1.308246  | 0.596338  |
| 7                | 1                | 0              | -1.145757               | -1.427274 | 0.563403  |
| 8                | 1                | 0              | -3.304313               | -2.512740 | -0.003150 |
| 9                | 1                | 0              | -5.283924               | 1.284412  | 0.227741  |
| 10               | 1                | 0              | -3.120334               | 2.376799  | 0.779445  |
| 11               | 6                | 0              | -0.663883               | 1.259222  | 0.941031  |
| 12               | 1                | 0              | -0.848941               | 2.123920  | 1.585038  |
| 13               | 7                | 0              | 0.047870                | 1.688927  | -0.260879 |
| 14               | 8                | 0              | 0.243785                | 0.382229  | 1.578489  |
| 15               | 6                | 0              | 1.231021                | -0.080331 | 0.628043  |
| 16               | 6                | 0              | 0.768784                | 0.501649  | -0.706063 |
| 17               | 1                | 0              | 1.604378                | 0.779192  | -1.346263 |
| 18               | 1                | 0              | 0.128706                | -0.205456 | -1.254887 |
| 19               | 1                | 0              | 1.225651                | -1.171341 | 0.643959  |
| 20               | 6                | 0              | 2.590100                | 0.462627  | 1.083299  |
| 21               | 1                | 0              | 2.696698                | 1.493473  | 0.714041  |
| 22               | 6                | 0              | 3.808502                | -0.344879 | 0.642069  |
| 23               | 1                | 0              | 3.708787                | -1.358711 | 1.055069  |
| 24               | 6                | 0              | 3.985988                | -0.455930 | -0.871229 |
| 25               | 1                | 0              | 3.904317                | 0.538819  | -1.320090 |
| 26               | 6                | 0              | 5.331333                | -1.051742 | -1.244309 |
| 27               | 1                | 0              | 5.433340                | -1.027569 | -2.334116 |
| 28               | 1                | 0              | 6.142216                | -0.479762 | -0.788212 |
| 29               | 8                | 0              | 2.667145                | 0.453129  | 2.503359  |
| 30               | 1                | 0              | 1.802255                | 0.738360  | 2.821589  |
| 31               | 8                | 0              | 4.965088                | 0.287837  | 1.167174  |
| 32               | 1                | 0              | 4.755615                | 0.498619  | 2.084504  |
| 33               | 8                | 0              | 2.952720                | -1.262114 | -1.420928 |
| 34               | 1                | 0              | 3.231801                | -2.173101 | -1.260699 |
| 35               | 8                | 0              | 5.311163                | -2.396780 | -0.772988 |
| 36               | 1                | 0              | 6.065978                | -2.859929 | -1.147619 |
| 37               | 6                | 0              | -0.747118               | 2.365447  | -1.278385 |
| 38               | 1                | 0              | -1.467164               | 1.676802  | -1.748076 |
| 39               | 1                | 0              | -1.324661               | 3.148568  | -0.778261 |
| 40               | 6                | 0              | 0.140082                | 2.987345  | -2.346684 |
| 41               | 1                | 0              | -0.463587               | 3.581497  | -3.035738 |
| 42               | 1                | 0              | 0.887616                | 3.639610  | -1.888775 |
| 43               | 1                | 0              | 0.658984                | 2.223391  | -2.929942 |
| 44               | 7                | 0              | -5.667641               | -1.308788 | -0.256049 |
| 45               | 8                | 0              | -6.652170               | -0.605424 | -0.352188 |

46 8 0 -5.671543 -2.511878 -0.417160

-----  
**Structure 21a (<sup>2</sup>E ec-ax H-bond N) (M06-2X, DMSO)**

Energy (Hartrees): = - 1220.6648769  
No imaginary frequencies

Standard orientation:

| Center<br>Number | Atomic<br>Number | Atomic<br>Type | Coordinates (Angstroms) |           |           |
|------------------|------------------|----------------|-------------------------|-----------|-----------|
|                  |                  |                | X                       | Y         | Z         |
| 1                | 6                | 0              | -1.579054               | 0.109242  | 0.541868  |
| 2                | 6                | 0              | -1.819554               | -0.748920 | -0.531905 |
| 3                | 6                | 0              | -3.098816               | -1.226409 | -0.779565 |
| 4                | 6                | 0              | -4.123361               | -0.838143 | 0.070895  |
| 5                | 6                | 0              | -3.915702               | -0.001214 | 1.157935  |
| 6                | 6                | 0              | -2.630886               | 0.468299  | 1.386618  |
| 7                | 1                | 0              | -1.001245               | -1.059920 | -1.170086 |
| 8                | 1                | 0              | -3.300522               | -1.891637 | -1.608084 |
| 9                | 1                | 0              | -4.738787               | 0.267622  | 1.805797  |
| 10               | 1                | 0              | -2.441987               | 1.116873  | 2.235487  |
| 11               | 6                | 0              | -0.191742               | 0.684089  | 0.791546  |
| 12               | 1                | 0              | -0.048282               | 0.814852  | 1.868284  |
| 13               | 7                | 0              | 0.066810                | 1.962090  | 0.116212  |
| 14               | 8                | 0              | 0.802218                | -0.176295 | 0.277961  |
| 15               | 6                | 0              | 1.368884                | 0.390148  | -0.922594 |
| 16               | 6                | 0              | 0.453399                | 1.570413  | -1.240315 |
| 17               | 1                | 0              | 0.986272                | 2.378388  | -1.741701 |
| 18               | 1                | 0              | -0.407829               | 1.271571  | -1.853222 |
| 19               | 1                | 0              | 1.358657                | -0.375798 | -1.694592 |
| 20               | 6                | 0              | 2.810266                | 0.832051  | -0.663119 |
| 21               | 1                | 0              | 3.290893                | 1.000599  | -1.635480 |
| 22               | 6                | 0              | 3.650346                | -0.176267 | 0.128332  |
| 23               | 1                | 0              | 3.116659                | -0.409100 | 1.057767  |
| 24               | 6                | 0              | 3.947462                | -1.480103 | -0.609705 |
| 25               | 1                | 0              | 4.473462                | -1.246724 | -1.540081 |
| 26               | 6                | 0              | 4.814862                | -2.401838 | 0.230006  |
| 27               | 1                | 0              | 5.059755                | -3.288590 | -0.363490 |
| 28               | 1                | 0              | 5.738317                | -1.892917 | 0.520005  |
| 29               | 8                | 0              | 2.870580                | 2.065038  | 0.056544  |
| 30               | 1                | 0              | 1.982419                | 2.242363  | 0.415496  |
| 31               | 8                | 0              | 4.903258                | 0.425319  | 0.420528  |
| 32               | 1                | 0              | 4.686489                | 1.321174  | 0.705971  |
| 33               | 8                | 0              | 2.751313                | -2.155329 | -0.964532 |
| 34               | 1                | 0              | 2.341897                | -2.418075 | -0.130484 |
| 35               | 8                | 0              | 4.038484                | -2.758722 | 1.370088  |
| 36               | 1                | 0              | 4.464939                | -3.503975 | 1.802576  |
| 37               | 6                | 0              | -0.966005               | 2.987790  | 0.225538  |
| 38               | 1                | 0              | -1.865335               | 2.704313  | -0.341080 |
| 39               | 1                | 0              | -1.249370               | 3.056508  | 1.279475  |
| 40               | 6                | 0              | -0.450959               | 4.335235  | -0.257015 |
| 41               | 1                | 0              | -1.204715               | 5.106261  | -0.084581 |
| 42               | 1                | 0              | 0.458468                | 4.614325  | 0.280770  |
| 43               | 1                | 0              | -0.230237               | 4.320267  | -1.326580 |
| 44               | 7                | 0              | -5.482005               | -1.345882 | -0.182000 |
| 45               | 8                | 0              | -6.357013               | -1.044735 | 0.603396  |
| 46               | 8                | 0              | -5.656138               | -2.038784 | -1.163082 |

-----  
**Structure 21a (<sup>2</sup>E ax-ax) (M06-2X, DMSO)**

Energy (Hartrees): = - 1220.6637192  
No imaginary frequencies

Standard orientation:

| Center<br>Number | Atomic<br>Number | Atomic<br>Type | Coordinates (Angstroms) |           |           |
|------------------|------------------|----------------|-------------------------|-----------|-----------|
|                  |                  |                | X                       | Y         | Z         |
| 1                | 6                | 0              | -1.960280               | 0.686536  | 0.379823  |
| 2                | 6                | 0              | -2.148819               | -0.494965 | 1.092386  |
| 3                | 6                | 0              | -3.314436               | -1.234274 | 0.930264  |
| 4                | 6                | 0              | -4.279261               | -0.760426 | 0.055842  |
| 5                | 6                | 0              | -4.123183               | 0.418803  | -0.662247 |
| 6                | 6                | 0              | -2.951378               | 1.137221  | -0.495140 |
| 7                | 1                | 0              | -1.382333               | -0.837532 | 1.776088  |
| 8                | 1                | 0              | -3.474333               | -2.157696 | 1.470409  |
| 9                | 1                | 0              | -4.900987               | 0.755925  | -1.333508 |
| 10               | 1                | 0              | -2.796763               | 2.055546  | -1.050049 |
| 11               | 6                | 0              | -0.703653               | 1.526459  | 0.543464  |
| 12               | 1                | 0              | -0.963146               | 2.465464  | 1.037851  |
| 13               | 7                | 0              | -0.068933               | 1.772304  | -0.732623 |
| 14               | 8                | 0              | 0.261046                | 0.860306  | 1.358050  |
| 15               | 6                | 0              | 1.136191                | 0.109153  | 0.494549  |
| 16               | 6                | 0              | 0.712954                | 0.542852  | -0.927549 |
| 17               | 1                | 0              | 1.557093                | 0.728686  | -1.588162 |

|    |   |   |           |           |           |
|----|---|---|-----------|-----------|-----------|
| 18 | 1 | 0 | 0.081612  | -0.223591 | -1.379840 |
| 19 | 1 | 0 | 0.965067  | -0.956311 | 0.666260  |
| 20 | 6 | 0 | 2.571877  | 0.485825  | 0.873285  |
| 21 | 1 | 0 | 2.846014  | 1.424247  | 0.369394  |
| 22 | 6 | 0 | 3.632732  | -0.560864 | 0.544200  |
| 23 | 1 | 0 | 3.370606  | -1.487187 | 1.075104  |
| 24 | 6 | 0 | 3.767053  | -0.876414 | -0.944565 |
| 25 | 1 | 0 | 3.858740  | 0.058377  | -1.506227 |
| 26 | 6 | 0 | 4.978964  | -1.744173 | -1.231933 |
| 27 | 1 | 0 | 5.070100  | -1.868984 | -2.315839 |
| 28 | 1 | 0 | 5.885428  | -1.276990 | -0.840851 |
| 29 | 8 | 0 | 2.676396  | 0.655802  | 2.282100  |
| 30 | 1 | 0 | 1.891483  | 1.145896  | 2.554843  |
| 31 | 8 | 0 | 4.886513  | -0.073778 | 0.995043  |
| 32 | 1 | 0 | 4.728737  | 0.279373  | 1.878290  |
| 33 | 8 | 0 | 2.600427  | -1.541825 | -1.406919 |
| 34 | 1 | 0 | 2.708236  | -2.461096 | -1.130185 |
| 35 | 8 | 0 | 4.722439  | -2.996953 | -0.602096 |
| 36 | 1 | 0 | 5.364260  | -3.636208 | -0.925024 |
| 37 | 6 | 0 | 0.731809  | 3.010760  | -0.715753 |
| 38 | 1 | 0 | 1.257487  | 3.137384  | 0.241376  |
| 39 | 1 | 0 | 1.491682  | 2.919400  | -1.494294 |
| 40 | 6 | 0 | -0.144767 | 4.220766  | -0.997081 |
| 41 | 1 | 0 | 0.454291  | 5.134592  | -0.999983 |
| 42 | 1 | 0 | -0.628063 | 4.118456  | -1.971520 |
| 43 | 1 | 0 | -0.923835 | 4.335462  | -0.238415 |
| 44 | 7 | 0 | -5.518549 | -1.535129 | -0.118622 |
| 45 | 8 | 0 | -6.353816 | -1.104375 | -0.886994 |
| 46 | 8 | 0 | -5.640982 | -2.563800 | 0.514033  |

-----

### Structure 21a (E<sub>2</sub> ec-ec) (M06-2X, DMSO)

Energy (Hartrees): = - 1220.661623

No imaginary frequencies

Standard orientation:

| Center<br>Number | Atomic<br>Number | Atomic<br>Type | Coordinates (Angstroms) |           |           |
|------------------|------------------|----------------|-------------------------|-----------|-----------|
|                  |                  |                | X                       | Y         | Z         |
| 1                | 6                | 0              | 2.103307                | -0.072823 | -0.354751 |
| 2                | 6                | 0              | 2.558245                | -0.074123 | 0.965010  |
| 3                | 6                | 0              | 3.905934                | -0.233036 | 1.239796  |
| 4                | 6                | 0              | 4.780339                | -0.387647 | 0.170126  |
| 5                | 6                | 0              | 4.359352                | -0.387606 | -1.149403 |
| 6                | 6                | 0              | 3.001788                | -0.228077 | -1.404748 |
| 7                | 1                | 0              | 1.847215                | 0.053565  | 1.772242  |
| 8                | 1                | 0              | 4.279444                | -0.237642 | 2.254607  |
| 9                | 1                | 0              | 5.074267                | -0.509538 | -1.951493 |
| 10               | 1                | 0              | 2.643044                | -0.224117 | -2.427885 |
| 11               | 6                | 0              | 0.630656                | 0.120506  | -0.618308 |
| 12               | 1                | 0              | 0.427475                | 0.032105  | -1.701189 |
| 13               | 7                | 0              | 0.138176                | 1.379585  | -0.086365 |
| 14               | 8                | 0              | -0.106553               | -0.855519 | 0.093095  |
| 15               | 6                | 0              | -1.416983               | -0.317502 | 0.376122  |
| 16               | 6                | 0              | -1.307856               | 1.168069  | 0.004746  |
| 17               | 1                | 0              | -1.798766               | 1.360618  | -0.964659 |
| 18               | 1                | 0              | -1.756619               | 1.813216  | 0.753188  |
| 19               | 1                | 0              | -1.599039               | -0.468927 | 1.442255  |
| 20               | 6                | 0              | -2.413419               | -1.134178 | -0.450889 |
| 21               | 1                | 0              | -2.341252               | -0.819573 | -1.502669 |
| 22               | 6                | 0              | -3.882991               | -1.086197 | -0.035829 |
| 23               | 1                | 0              | -3.956146               | -1.438438 | 1.002829  |
| 24               | 6                | 0              | -4.526713               | 0.296833  | -0.122750 |
| 25               | 1                | 0              | -4.264029               | 0.764831  | -1.076167 |
| 26               | 6                | 0              | -6.039495               | 0.230395  | -0.008985 |
| 27               | 1                | 0              | -6.442641               | 1.237530  | -0.156594 |
| 28               | 1                | 0              | -6.453463               | -0.442591 | -0.762567 |
| 29               | 8                | 0              | -2.079135               | -2.514825 | -0.343456 |
| 30               | 1                | 0              | -1.125565               | -2.574217 | -0.473594 |
| 31               | 8                | 0              | -4.600739               | -1.952950 | -0.899922 |
| 32               | 1                | 0              | -4.072682               | -2.757373 | -0.962582 |
| 33               | 8                | 0              | -4.023817               | 1.124876  | 0.915053  |
| 34               | 1                | 0              | -4.514287               | 0.862849  | 1.705446  |
| 35               | 8                | 0              | -6.313969               | -0.230733 | 1.311431  |
| 36               | 1                | 0              | -7.246991               | -0.088740 | 1.495482  |
| 37               | 6                | 0              | 0.517622                | 2.531347  | -0.898587 |
| 38               | 1                | 0              | 1.607989                | 2.533418  | -0.987159 |
| 39               | 1                | 0              | 0.103269                | 2.435813  | -1.916729 |
| 40               | 6                | 0              | 0.054116                | 3.835267  | -0.268764 |
| 41               | 1                | 0              | 0.429142                | 4.685642  | -0.841616 |
| 42               | 1                | 0              | -1.035887               | 3.903085  | -0.244726 |
| 43               | 1                | 0              | 0.427192                | 3.916234  | 0.755103  |
| 44               | 7                | 0              | 6.216998                | -0.556059 | 0.451646  |
| 45               | 8                | 0              | 6.961896                | -0.745263 | -0.487496 |
| 46               | 8                | 0              | 6.579654                | -0.496814 | 1.608144  |

-----  
**Structure 21b (<sup>2</sup>E ec-ec H-bond O) (M06-2X, Gas Phase)**

Energy (Hartrees): = - 1220.6390864  
 No imaginary frequencies

Standard orientation:

| Center<br>Number | Atomic<br>Number | Atomic<br>Type | Coordinates (Angstroms) |           |           |
|------------------|------------------|----------------|-------------------------|-----------|-----------|
|                  |                  |                | X                       | Y         | Z         |
| 1                | 6                | 0              | -1.962593               | 0.569213  | -0.648108 |
| 2                | 6                | 0              | -1.988332               | -0.532628 | 0.208989  |
| 3                | 6                | 0              | -3.194612               | -1.111348 | 0.565858  |
| 4                | 6                | 0              | -4.365097               | -0.563561 | 0.056301  |
| 5                | 6                | 0              | -4.371942               | 0.528310  | -0.793209 |
| 6                | 6                | 0              | -3.150751               | 1.091624  | -1.146005 |
| 7                | 1                | 0              | -1.055843               | -0.931607 | 0.592616  |
| 8                | 1                | 0              | -3.248737               | -1.967326 | 1.224142  |
| 9                | 1                | 0              | -5.312476               | 0.913280  | -1.162213 |
| 10               | 1                | 0              | -3.124854               | 1.944902  | -1.814644 |
| 11               | 6                | 0              | -0.633758               | 1.186127  | -1.012725 |
| 12               | 1                | 0              | -0.789174               | 1.990604  | -1.756411 |
| 13               | 7                | 0              | 0.080298                | 1.671450  | 0.154841  |
| 14               | 8                | 0              | 0.223457                | 0.211703  | -1.581668 |
| 15               | 6                | 0              | 1.546986                | 0.357032  | -1.031992 |
| 16               | 6                | 0              | 1.474890                | 1.675703  | -0.271580 |
| 17               | 1                | 0              | 2.153969                | 1.705616  | 0.577877  |
| 18               | 1                | 0              | 1.705067                | 2.525052  | -0.935797 |
| 19               | 1                | 0              | 2.251597                | 0.382870  | -1.862626 |
| 20               | 6                | 0              | 1.816911                | -0.846089 | -0.112763 |
| 21               | 1                | 0              | 1.456784                | -0.603826 | 0.898427  |
| 22               | 6                | 0              | 3.281307                | -1.271110 | -0.022950 |
| 23               | 1                | 0              | 3.637475                | -1.493625 | -1.039176 |
| 24               | 6                | 0              | 4.199935                | -0.219266 | 0.593710  |
| 25               | 1                | 0              | 3.781431                | 0.102230  | 1.553104  |
| 26               | 6                | 0              | 5.597492                | -0.769075 | 0.824900  |
| 27               | 1                | 0              | 6.183286                | -0.025299 | 1.376519  |
| 28               | 1                | 0              | 5.540792                | -1.702403 | 1.388539  |
| 29               | 8                | 0              | 1.135619                | -1.998479 | -0.584526 |
| 30               | 1                | 0              | 0.381504                | -1.686545 | -1.099333 |
| 31               | 8                | 0              | 3.362002                | -2.422377 | 0.793221  |
| 32               | 1                | 0              | 2.668262                | -3.017203 | 0.487799  |
| 33               | 8                | 0              | 4.278698                | 0.921615  | -0.245699 |
| 34               | 1                | 0              | 4.944004                | 0.704908  | -0.910635 |
| 35               | 8                | 0              | 6.141569                | -0.968812 | -0.476063 |
| 36               | 1                | 0              | 7.035322                | -1.305377 | -0.396864 |
| 37               | 6                | 0              | -0.425591               | 2.945561  | 0.644504  |
| 38               | 1                | 0              | -0.307571               | 3.729981  | -0.124382 |
| 39               | 1                | 0              | -1.497806               | 2.826363  | 0.825997  |
| 40               | 6                | 0              | 0.264983                | 3.368999  | 1.932475  |
| 41               | 1                | 0              | -0.196711               | 4.273331  | 2.331458  |
| 42               | 1                | 0              | 0.182170                | 2.576006  | 2.677777  |
| 43               | 1                | 0              | 1.323222                | 3.580319  | 1.767299  |
| 44               | 7                | 0              | -5.658155               | -1.172250 | 0.436842  |
| 45               | 8                | 0              | -6.664802               | -0.669906 | -0.011052 |
| 46               | 8                | 0              | -5.627253               | -2.132944 | 1.172576  |

-----  
**Structure 21b (<sup>2</sup>E ec-ec H-bond N) (M06-2X, Gas Phase)**

Energy (Hartrees): = - 1220.6414382  
 No imaginary frequencies

Standard orientation:

| Center<br>Number | Atomic<br>Number | Atomic<br>Type | Coordinates (Angstroms) |           |           |
|------------------|------------------|----------------|-------------------------|-----------|-----------|
|                  |                  |                | X                       | Y         | Z         |
| 1                | 6                | 0              | -1.416184               | 0.509402  | -0.707919 |
| 2                | 6                | 0              | -1.326809               | -0.405768 | 0.341838  |
| 3                | 6                | 0              | -2.424172               | -1.177024 | 0.688435  |
| 4                | 6                | 0              | -3.600802               | -1.013472 | -0.029988 |
| 5                | 6                | 0              | -3.718527               | -0.117156 | -1.077775 |
| 6                | 6                | 0              | -2.605864               | 0.644636  | -1.415709 |
| 7                | 1                | 0              | -0.392316               | -0.508991 | 0.880953  |
| 8                | 1                | 0              | -2.386509               | -1.896207 | 1.494719  |
| 9                | 1                | 0              | -4.657026               | -0.033088 | -1.607758 |
| 10               | 1                | 0              | -2.665663               | 1.346564  | -2.240377 |
| 11               | 6                | 0              | -0.218743               | 1.359364  | -1.055109 |
| 12               | 1                | 0              | -0.379803               | 1.843313  | -2.036604 |
| 13               | 7                | 0              | 0.056811                | 2.372364  | -0.033189 |
| 14               | 8                | 0              | 0.950669                | 0.577599  | -1.102541 |
| 15               | 6                | 0              | 2.043381                | 1.313775  | -0.528247 |
| 16               | 6                | 0              | 1.458016                | 2.708272  | -0.297778 |



|    |   |   |           |           |           |
|----|---|---|-----------|-----------|-----------|
| 17 | 1 | 0 | 1.911808  | 3.213638  | 0.555759  |
| 18 | 1 | 0 | 1.558279  | 3.339371  | -1.194754 |
| 19 | 1 | 0 | 2.868790  | 1.310111  | -1.236273 |
| 20 | 6 | 0 | 2.488179  | 0.648114  | 0.773583  |
| 21 | 1 | 0 | 3.434591  | 1.111933  | 1.086372  |
| 22 | 6 | 0 | 2.706841  | -0.864757 | 0.669332  |
| 23 | 1 | 0 | 1.798866  | -1.319240 | 0.252278  |
| 24 | 6 | 0 | 3.899277  | -1.269598 | -0.195209 |
| 25 | 1 | 0 | 4.801702  | -0.807974 | 0.216891  |
| 26 | 6 | 0 | 4.070237  | -2.780126 | -0.198688 |
| 27 | 1 | 0 | 4.993376  | -3.028748 | -0.733609 |
| 28 | 1 | 0 | 4.115174  | -3.150170 | 0.828395  |
| 29 | 8 | 0 | 1.544307  | 0.840735  | 1.826502  |
| 30 | 1 | 0 | 0.781991  | 1.335946  | 1.484319  |
| 31 | 8 | 0 | 2.969027  | -1.367086 | 1.967060  |
| 32 | 1 | 0 | 2.328132  | -0.944058 | 2.549147  |
| 33 | 8 | 0 | 3.758621  | -0.807930 | -1.525058 |
| 34 | 1 | 0 | 3.078623  | -1.362638 | -1.927120 |
| 35 | 8 | 0 | 2.936431  | -3.288789 | -0.893038 |
| 36 | 1 | 0 | 3.005167  | -4.242766 | -0.950285 |
| 37 | 6 | 0 | -0.869750 | 3.498952  | -0.067844 |
| 38 | 1 | 0 | -0.817575 | 4.002105  | -1.048580 |
| 39 | 1 | 0 | -1.880042 | 3.095864  | 0.041278  |
| 40 | 6 | 0 | -0.590386 | 4.494123  | 1.048504  |
| 41 | 1 | 0 | -1.359917 | 5.267005  | 1.065927  |
| 42 | 1 | 0 | -0.586900 | 3.986299  | 2.014859  |
| 43 | 1 | 0 | 0.373704  | 4.988235  | 0.913938  |
| 44 | 7 | 0 | -4.776666 | -1.832453 | 0.336500  |
| 45 | 8 | 0 | -5.796801 | -1.657272 | -0.292046 |
| 46 | 8 | 0 | -4.643957 | -2.624543 | 1.241971  |

-----

### Structure 21b (<sup>2</sup>E ax-ec) (M06-2X, Gas Phase)

Energy (Hartrees): = - 1220.6330062  
 No imaginary frequencies

Standard orientation:

| Center<br>Number | Atomic<br>Number | Atomic<br>Type | Coordinates (Angstroms) |           |           |
|------------------|------------------|----------------|-------------------------|-----------|-----------|
|                  |                  |                | X                       | Y         | Z         |
| 1                | 6                | 0              | 2.004556                | -0.379202 | -0.669667 |
| 2                | 6                | 0              | 2.311170                | 0.885024  | -0.175223 |
| 3                | 6                | 0              | 3.630353                | 1.234865  | 0.081664  |
| 4                | 6                | 0              | 4.622219                | 0.302254  | -0.173222 |
| 5                | 6                | 0              | 4.349010                | -0.959196 | -0.681216 |
| 6                | 6                | 0              | 3.027122                | -1.290831 | -0.931740 |
| 7                | 1                | 0              | 1.514175                | 1.593330  | 0.008980  |
| 8                | 1                | 0              | 3.900536                | 2.207505  | 0.468865  |
| 9                | 1                | 0              | 5.161165                | -1.647688 | -0.868731 |
| 10               | 1                | 0              | 2.779193                | -2.273361 | -1.317471 |
| 11               | 6                | 0              | 0.582629                | -0.809219 | -0.909475 |
| 12               | 1                | 0              | 0.545047                | -1.402909 | -1.832991 |
| 13               | 7                | 0              | -0.018360               | -1.613969 | 0.139553  |
| 14               | 8                | 0              | -0.266286               | 0.325838  | -1.077942 |
| 15               | 6                | 0              | -1.612887               | -0.117754 | -0.844386 |
| 16               | 6                | 0              | -1.429523               | -1.545422 | -0.263458 |
| 17               | 1                | 0              | -2.089682               | -1.761188 | 0.572448  |
| 18               | 1                | 0              | -1.623684               | -2.288191 | -1.038612 |
| 19               | 1                | 0              | -2.145417               | -0.134012 | -1.798890 |
| 20               | 6                | 0              | -2.258670               | 0.895534  | 0.102621  |
| 21               | 1                | 0              | -1.962312               | 0.668601  | 1.138177  |
| 22               | 6                | 0              | -3.782659               | 0.968808  | 0.044643  |
| 23               | 1                | 0              | -4.071029               | 1.222258  | -0.985200 |
| 24               | 6                | 0              | -4.495085               | -0.321571 | 0.440545  |
| 25               | 1                | 0              | -4.112028               | -0.663986 | 1.407682  |
| 26               | 6                | 0              | -5.996035               | -0.112324 | 0.553593  |
| 27               | 1                | 0              | -6.450829               | -1.025245 | 0.953969  |
| 28               | 1                | 0              | -6.204004               | 0.735639  | 1.208915  |
| 29               | 8                | 0              | -1.838765               | 2.211921  | -0.226729 |
| 30               | 1                | 0              | -0.929101               | 2.148012  | -0.535818 |
| 31               | 8                | 0              | -4.211125               | 1.974431  | 0.941611  |
| 32               | 1                | 0              | -3.653235               | 2.741529  | 0.772865  |
| 33               | 8                | 0              | -4.233848               | -1.339534 | -0.511134 |
| 34               | 1                | 0              | -4.858994               | -1.185777 | -1.230448 |
| 35               | 8                | 0              | -6.442321               | 0.126326  | -0.777331 |
| 36               | 1                | 0              | -7.387942               | 0.281347  | -0.771272 |
| 37               | 6                | 0              | 0.220321                | -1.115972 | 1.509537  |
| 38               | 1                | 0              | 0.298771                | -0.020252 | 1.540433  |
| 39               | 1                | 0              | -0.662238               | -1.378946 | 2.096380  |
| 40               | 6                | 0              | 1.438371                | -1.757340 | 2.164528  |
| 41               | 1                | 0              | 1.472151                | -1.494217 | 3.224253  |
| 42               | 1                | 0              | 1.373429                | -2.843025 | 2.075396  |
| 43               | 1                | 0              | 2.373549                | -1.430864 | 1.709520  |
| 44               | 7                | 0              | 6.028416                | 0.668906  | 0.099416  |
| 45               | 8                | 0              | 6.877099                | -0.160747 | -0.139300 |

46 8 0 6.239837 1.774385 0.545361

Structure 21b (<sup>2</sup>E ec-ec H-bond O) (M06-2X, Benzene)

Energy (Hartrees): = - 1220.6613835  
No imaginary frequencies

Standard orientation:

| Center Number | Atomic Number | Atomic Type | Coordinates (Angstroms) |           |           |
|---------------|---------------|-------------|-------------------------|-----------|-----------|
|               |               |             | X                       | Y         | Z         |
| 1             | 6             | 0           | -1.972033               | 0.561522  | -0.646814 |
| 2             | 6             | 0           | -2.003534               | -0.529300 | 0.224081  |
| 3             | 6             | 0           | -3.211237               | -1.104789 | 0.580200  |
| 4             | 6             | 0           | -4.378835               | -0.561197 | 0.058185  |
| 5             | 6             | 0           | -4.380311               | 0.522135  | -0.803308 |
| 6             | 6             | 0           | -3.157180               | 1.080116  | -1.156838 |
| 7             | 1             | 0           | -1.074809               | -0.924093 | 0.620738  |
| 8             | 1             | 0           | -3.262932               | -1.953875 | 1.247692  |
| 9             | 1             | 0           | -5.315544               | 0.909226  | -1.183557 |
| 10            | 1             | 0           | -3.128289               | 1.925379  | -1.835421 |
| 11            | 6             | 0           | -0.639918               | 1.172911  | -1.011984 |
| 12            | 1             | 0           | -0.790044               | 1.969102  | -1.764079 |
| 13            | 7             | 0           | 0.072667                | 1.666264  | 0.153138  |
| 14            | 8             | 0           | 0.216011                | 0.186520  | -1.566142 |
| 15            | 6             | 0           | 1.543943                | 0.345134  | -1.027002 |
| 16            | 6             | 0           | 1.468295                | 1.667478  | -0.273219 |
| 17            | 1             | 0           | 2.144069                | 1.702475  | 0.578776  |
| 18            | 1             | 0           | 1.697180                | 2.513692  | -0.941021 |
| 19            | 1             | 0           | 2.241197                | 0.370792  | -1.864017 |
| 20            | 6             | 0           | 1.829395                | -0.852979 | -0.105855 |
| 21            | 1             | 0           | 1.470426                | -0.613631 | 0.906343  |
| 22            | 6             | 0           | 3.298117                | -1.265875 | -0.021351 |
| 23            | 1             | 0           | 3.651065                | -1.485782 | -1.039058 |
| 24            | 6             | 0           | 4.213514                | -0.208687 | 0.593179  |
| 25            | 1             | 0           | 3.795794                | 0.115502  | 1.551955  |
| 26            | 6             | 0           | 5.614435                | -0.747554 | 0.824775  |
| 27            | 1             | 0           | 6.198279                | 0.007170  | 1.363452  |
| 28            | 1             | 0           | 5.572486                | -1.671101 | 1.405971  |
| 29            | 8             | 0           | 1.157258                | -2.012992 | -0.577233 |
| 30            | 1             | 0           | 0.380002                | -1.704987 | -1.059339 |
| 31            | 8             | 0           | 3.389043                | -2.421025 | 0.791860  |
| 32            | 1             | 0           | 2.698255                | -3.018791 | 0.484764  |
| 33            | 8             | 0           | 4.287426                | 0.930127  | -0.251428 |
| 34            | 1             | 0           | 4.943763                | 0.707038  | -0.923674 |
| 35            | 8             | 0           | 6.157755                | -0.966574 | -0.473777 |
| 36            | 1             | 0           | 7.069495                | -1.252852 | -0.385203 |
| 37            | 6             | 0           | -0.429770               | 2.947879  | 0.631238  |
| 38            | 1             | 0           | -0.312510               | 3.723758  | -0.145505 |
| 39            | 1             | 0           | -1.501267               | 2.834034  | 0.819174  |
| 40            | 6             | 0           | 0.267042                | 3.382511  | 1.910962  |
| 41            | 1             | 0           | -0.200083               | 4.285181  | 2.309130  |
| 42            | 1             | 0           | 0.197443                | 2.593921  | 2.663425  |
| 43            | 1             | 0           | 1.322363                | 3.603803  | 1.737814  |
| 44            | 7             | 0           | -5.671748               | -1.165450 | 0.436021  |
| 45            | 8             | 0           | -6.682302               | -0.625623 | 0.040300  |
| 46            | 8             | 0           | -5.646981               | -2.165117 | 1.120175  |

Structure 21b (<sup>2</sup>E ec-ec H-bond N) (M06-2X, Benzene)

Energy (Hartrees): = - 1220.6642615  
No imaginary frequencies

Standard orientation:

| Center Number | Atomic Number | Atomic Type | Coordinates (Angstroms) |           |           |
|---------------|---------------|-------------|-------------------------|-----------|-----------|
|               |               |             | X                       | Y         | Z         |
| 1             | 6             | 0           | -1.409699               | 0.523901  | -0.700514 |
| 2             | 6             | 0           | -1.338359               | -0.358722 | 0.378358  |
| 3             | 6             | 0           | -2.438255               | -1.125249 | 0.726551  |
| 4             | 6             | 0           | -3.601144               | -0.989754 | -0.020387 |
| 5             | 6             | 0           | -3.701637               | -0.124667 | -1.096645 |
| 6             | 6             | 0           | -2.586351               | 0.632822  | -1.434475 |
| 7             | 1             | 0           | -0.415703               | -0.445341 | 0.940541  |
| 8             | 1             | 0           | -2.406943               | -1.818763 | 1.555386  |
| 9             | 1             | 0           | -4.626974               | -0.056744 | -1.651723 |
| 10            | 1             | 0           | -2.633652               | 1.310753  | -2.279677 |
| 11            | 6             | 0           | -0.208140               | 1.365794  | -1.056059 |
| 12            | 1             | 0           | -0.372037               | 1.846541  | -2.037594 |
| 13            | 7             | 0           | 0.085934                | 2.378045  | -0.039771 |
| 14            | 8             | 0           | 0.955531                | 0.571146  | -1.108955 |
| 15            | 6             | 0           | 2.059219                | 1.303592  | -0.548021 |
| 16            | 6             | 0           | 1.486626                | 2.703650  | -0.325184 |

|    |   |   |           |           |           |
|----|---|---|-----------|-----------|-----------|
| 17 | 1 | 0 | 1.953723  | 3.217314  | 0.515852  |
| 18 | 1 | 0 | 1.578970  | 3.322444  | -1.230600 |
| 19 | 1 | 0 | 2.878954  | 1.290910  | -1.262280 |
| 20 | 6 | 0 | 2.510418  | 0.645192  | 0.755827  |
| 21 | 1 | 0 | 3.468573  | 1.096407  | 1.049347  |
| 22 | 6 | 0 | 2.696451  | -0.873831 | 0.669939  |
| 23 | 1 | 0 | 1.774175  | -1.312621 | 0.268714  |
| 24 | 6 | 0 | 3.871508  | -1.321108 | -0.197900 |
| 25 | 1 | 0 | 4.790871  | -0.882316 | 0.201681  |
| 26 | 6 | 0 | 4.002438  | -2.835067 | -0.192507 |
| 27 | 1 | 0 | 4.910315  | -3.111441 | -0.739738 |
| 28 | 1 | 0 | 4.060388  | -3.203960 | 0.834692  |
| 29 | 8 | 0 | 1.582841  | 0.872069  | 1.818572  |
| 30 | 1 | 0 | 0.820208  | 1.364073  | 1.468629  |
| 31 | 8 | 0 | 2.954949  | -1.365254 | 1.974888  |
| 32 | 1 | 0 | 2.321669  | -0.921617 | 2.550493  |
| 33 | 8 | 0 | 3.732887  | -0.868341 | -1.532689 |
| 34 | 1 | 0 | 3.026639  | -1.401861 | -1.918312 |
| 35 | 8 | 0 | 2.844947  | -3.326351 | -0.860912 |
| 36 | 1 | 0 | 2.936385  | -4.273829 | -0.982170 |
| 37 | 6 | 0 | -0.832000 | 3.513802  | -0.068825 |
| 38 | 1 | 0 | -0.779266 | 4.016177  | -1.049034 |
| 39 | 1 | 0 | -1.845511 | 3.120844  | 0.046545  |
| 40 | 6 | 0 | -0.540103 | 4.505520  | 1.045954  |
| 41 | 1 | 0 | -1.305341 | 5.283580  | 1.064180  |
| 42 | 1 | 0 | -0.539480 | 4.000205  | 2.014294  |
| 43 | 1 | 0 | 0.426563  | 4.995179  | 0.910297  |
| 44 | 7 | 0 | -4.776135 | -1.806789 | 0.341790  |
| 45 | 8 | 0 | -5.786165 | -1.661560 | -0.312428 |
| 46 | 8 | 0 | -4.662109 | -2.575457 | 1.271483  |

### Structure 21b (<sup>2</sup>E ax-ec) (M06-2X, Benzene)

Energy (Hartrees): = - 1220.6548393  
 No imaginary frequencies

Standard orientation:

| Center Number | Atomic Number | Atomic Type | Coordinates (Angstroms) |           |           |
|---------------|---------------|-------------|-------------------------|-----------|-----------|
|               |               |             | X                       | Y         | Z         |
| 1             | 6             | 0           | 2.009160                | -0.373731 | -0.660307 |
| 2             | 6             | 0           | 2.324331                | 0.899074  | -0.193765 |
| 3             | 6             | 0           | 3.645961                | 1.245364  | 0.055612  |
| 4             | 6             | 0           | 4.631341                | 0.298748  | -0.174048 |
| 5             | 6             | 0           | 4.348699                | -0.974257 | -0.649200 |
| 6             | 6             | 0           | 3.025183                | -1.301675 | -0.893756 |
| 7             | 1             | 0           | 1.535601                | 1.620977  | -0.026657 |
| 8             | 1             | 0           | 3.917007                | 2.227190  | 0.418442  |
| 9             | 1             | 0           | 5.151209                | -1.678672 | -0.818988 |
| 10            | 1             | 0           | 2.771241                | -2.291912 | -1.255357 |
| 11            | 6             | 0           | 0.585975                | -0.798715 | -0.905513 |
| 12            | 1             | 0           | 0.550800                | -1.385416 | -1.833322 |
| 13            | 7             | 0           | -0.019186               | -1.610698 | 0.136170  |
| 14            | 8             | 0           | -0.263330               | 0.338074  | -1.066869 |
| 15            | 6             | 0           | -1.611470               | -0.110036 | -0.843393 |
| 16            | 6             | 0           | -1.428152               | -1.543454 | -0.278563 |
| 17            | 1             | 0           | -2.092718               | -1.770078 | 0.550794  |
| 18            | 1             | 0           | -1.609374               | -2.276949 | -1.065605 |
| 19            | 1             | 0           | -2.139170               | -0.114319 | -1.800529 |
| 20            | 6             | 0           | -2.261898               | 0.888798  | 0.116885  |
| 21            | 1             | 0           | -1.970367               | 0.645550  | 1.149467  |
| 22            | 6             | 0           | -3.785907               | 0.967298  | 0.056485  |
| 23            | 1             | 0           | -4.070958               | 1.247035  | -0.967279 |
| 24            | 6             | 0           | -4.504260               | -0.329770 | 0.421212  |
| 25            | 1             | 0           | -4.126422               | -0.695427 | 1.381652  |
| 26            | 6             | 0           | -6.005697               | -0.126119 | 0.531959  |
| 27            | 1             | 0           | -6.460074               | -1.053109 | 0.899116  |
| 28            | 1             | 0           | -6.226144               | 0.694347  | 1.217993  |
| 29            | 8             | 0           | -1.836659               | 2.210711  | -0.190609 |
| 30            | 1             | 0           | -0.915352               | 2.149405  | -0.465336 |
| 31            | 8             | 0           | -4.211892               | 1.956403  | 0.976067  |
| 32            | 1             | 0           | -3.649830               | 2.724108  | 0.823638  |
| 33            | 8             | 0           | -4.240072               | -1.326285 | -0.553657 |
| 34            | 1             | 0           | -4.855708               | -1.146400 | -1.275639 |
| 35            | 8             | 0           | -6.451144               | 0.160080  | -0.790306 |
| 36            | 1             | 0           | -7.409727               | 0.207849  | -0.792277 |
| 37            | 6             | 0           | 0.205847                | -1.115505 | 1.510546  |
| 38            | 1             | 0           | 0.288241                | -0.020311 | 1.542573  |
| 39            | 1             | 0           | -0.682960               | -1.377390 | 2.088104  |
| 40            | 6             | 0           | 1.414483                | -1.759859 | 2.177842  |
| 41            | 1             | 0           | 1.424773                | -1.514376 | 3.242849  |
| 42            | 1             | 0           | 1.360797                | -2.845494 | 2.072912  |
| 43            | 1             | 0           | 2.358417                | -1.420239 | 1.750313  |
| 44            | 7             | 0           | 6.037869                | 0.662038  | 0.086453  |

|    |   |   |          |           |           |
|----|---|---|----------|-----------|-----------|
| 45 | 8 | 0 | 6.887207 | -0.167060 | -0.157801 |
| 46 | 8 | 0 | 6.260685 | 1.767737  | 0.529775  |

-----  
**Structure 21b (<sup>2</sup>E ec-ec H-bond O) (M06-2X, DMSO)**

Energy (Hartrees): = - 1220.6648592  
 No imaginary frequencies

Standard orientation:

| Center<br>Number | Atomic<br>Number | Atomic<br>Type | Coordinates (Angstroms) |           |           |
|------------------|------------------|----------------|-------------------------|-----------|-----------|
|                  |                  |                | X                       | Y         | Z         |
| 1                | 6                | 0              | -1.982565               | 0.553980  | -0.635284 |
| 2                | 6                | 0              | -2.023039               | -0.536553 | 0.236261  |
| 3                | 6                | 0              | -3.234645               | -1.104228 | 0.592016  |
| 4                | 6                | 0              | -4.397297               | -0.552447 | 0.066345  |
| 5                | 6                | 0              | -4.390552               | 0.532562  | -0.794218 |
| 6                | 6                | 0              | -3.163307               | 1.082657  | -1.146301 |
| 7                | 1                | 0              | -1.100236               | -0.939497 | 0.639132  |
| 8                | 1                | 0              | -3.286715               | -1.951608 | 1.261913  |
| 9                | 1                | 0              | -5.319259               | 0.930520  | -1.179814 |
| 10               | 1                | 0              | -3.127340               | 1.928927  | -1.823217 |
| 11               | 6                | 0              | -0.646489               | 1.153789  | -1.004204 |
| 12               | 1                | 0              | -0.789519               | 1.946109  | -1.759068 |
| 13               | 7                | 0              | 0.070731                | 1.648948  | 0.159119  |
| 14               | 8                | 0              | 0.199638                | 0.151063  | -1.548562 |
| 15               | 6                | 0              | 1.536324                | 0.320548  | -1.031751 |
| 16               | 6                | 0              | 1.465708                | 1.642669  | -0.276660 |
| 17               | 1                | 0              | 2.143557                | 1.676087  | 0.574056  |
| 18               | 1                | 0              | 1.688575                | 2.488187  | -0.946078 |
| 19               | 1                | 0              | 2.220869                | 0.349622  | -1.879276 |
| 20               | 6                | 0              | 1.841500                | -0.876610 | -0.119185 |
| 21               | 1                | 0              | 1.469087                | -0.654934 | 0.892027  |
| 22               | 6                | 0              | 3.315980                | -1.261502 | -0.024280 |
| 23               | 1                | 0              | 3.673977                | -1.486236 | -1.039091 |
| 24               | 6                | 0              | 4.212760                | -0.180035 | 0.576254  |
| 25               | 1                | 0              | 3.775446                | 0.174161  | 1.515048  |
| 26               | 6                | 0              | 5.614793                | -0.692180 | 0.852261  |
| 27               | 1                | 0              | 6.181891                | 0.100295  | 1.351670  |
| 28               | 1                | 0              | 5.581397                | -1.576195 | 1.492637  |
| 29               | 8                | 0              | 1.199677                | -2.047867 | -0.611150 |
| 30               | 1                | 0              | 0.376850                | -1.754058 | -1.021683 |
| 31               | 8                | 0              | 3.421176                | -2.411279 | 0.800095  |
| 32               | 1                | 0              | 2.729153                | -3.013299 | 0.503244  |
| 33               | 8                | 0              | 4.292129                | 0.930964  | -0.305771 |
| 34               | 1                | 0              | 4.941981                | 0.677548  | -0.974211 |
| 35               | 8                | 0              | 6.182430                | -0.988220 | -0.421364 |
| 36               | 1                | 0              | 7.125708                | -1.135812 | -0.306637 |
| 37               | 6                | 0              | -0.418047               | 2.948082  | 0.611571  |
| 38               | 1                | 0              | -0.295712               | 3.702057  | -0.183982 |
| 39               | 1                | 0              | -1.490108               | 2.850357  | 0.806006  |
| 40               | 6                | 0              | 0.291643                | 3.404111  | 1.876255  |
| 41               | 1                | 0              | -0.163348               | 4.322007  | 2.253602  |
| 42               | 1                | 0              | 0.218179                | 2.636818  | 2.650915  |
| 43               | 1                | 0              | 1.348609                | 3.607587  | 1.690530  |
| 44               | 7                | 0              | -5.692010               | -1.149049 | 0.438838  |
| 45               | 8                | 0              | -6.702600               | -0.600153 | 0.051578  |
| 46               | 8                | 0              | -5.678783               | -2.157882 | 1.112934  |

-----  
**Structure 21b (<sup>2</sup>E ec-ec H-bond N) (M06-2X, DMSO)**

Energy (Hartrees): = - 1220.6683257  
 No imaginary frequencies

Standard orientation:

| Center<br>Number | Atomic<br>Number | Atomic<br>Type | Coordinates (Angstroms) |           |           |
|------------------|------------------|----------------|-------------------------|-----------|-----------|
|                  |                  |                | X                       | Y         | Z         |
| 1                | 6                | 0              | -1.417877               | 0.528031  | -0.706053 |
| 2                | 6                | 0              | -1.315920               | -0.408920 | 0.324325  |
| 3                | 6                | 0              | -2.407143               | -1.189101 | 0.670045  |
| 4                | 6                | 0              | -3.592743               | -1.011860 | -0.032363 |
| 5                | 6                | 0              | -3.724421               | -0.091705 | -1.059629 |
| 6                | 6                | 0              | -2.617817               | 0.679641  | -1.394631 |
| 7                | 1                | 0              | -0.377763               | -0.528354 | 0.853926  |
| 8                | 1                | 0              | -2.346368               | -1.921136 | 1.463660  |
| 9                | 1                | 0              | -4.664680               | 0.014093  | -1.583006 |
| 10               | 1                | 0              | -2.690820               | 1.403181  | -2.199124 |
| 11               | 6                | 0              | -0.225578               | 1.384400  | -1.058474 |
| 12               | 1                | 0              | -0.398538               | 1.878392  | -2.029457 |
| 13               | 7                | 0              | 0.067382                | 2.380799  | -0.025927 |
| 14               | 8                | 0              | 0.944831                | 0.594054  | -1.129280 |
| 15               | 6                | 0              | 2.043374                | 1.321079  | -0.548309 |

|    |   |   |           |           |           |
|----|---|---|-----------|-----------|-----------|
| 16 | 6 | 0 | 1.467196  | 2.715995  | -0.315885 |
| 17 | 1 | 0 | 1.936118  | 3.229203  | 0.523951  |
| 18 | 1 | 0 | 1.549302  | 3.337370  | -1.219175 |
| 19 | 1 | 0 | 2.870287  | 1.320576  | -1.253815 |
| 20 | 6 | 0 | 2.485780  | 0.651235  | 0.753090  |
| 21 | 1 | 0 | 3.439419  | 1.104473  | 1.056484  |
| 22 | 6 | 0 | 2.677908  | -0.866725 | 0.652506  |
| 23 | 1 | 0 | 1.775307  | -1.301873 | 0.205472  |
| 24 | 6 | 0 | 3.892453  | -1.295261 | -0.168935 |
| 25 | 1 | 0 | 4.788709  | -0.842393 | 0.265474  |
| 26 | 6 | 0 | 4.051210  | -2.805582 | -0.167548 |
| 27 | 1 | 0 | 4.974364  | -3.061990 | -0.697471 |
| 28 | 1 | 0 | 4.102329  | -3.181711 | 0.857383  |
| 29 | 8 | 0 | 1.545970  | 0.866848  | 1.809478  |
| 30 | 1 | 0 | 0.786733  | 1.360622  | 1.448936  |
| 31 | 8 | 0 | 2.873565  | -1.379993 | 1.962348  |
| 32 | 1 | 0 | 2.225353  | -0.923192 | 2.511633  |
| 33 | 8 | 0 | 3.796464  | -0.838382 | -1.508501 |
| 34 | 1 | 0 | 3.117399  | -1.387725 | -1.920534 |
| 35 | 8 | 0 | 2.916598  | -3.324893 | -0.856957 |
| 36 | 1 | 0 | 3.083221  | -4.249857 | -1.059692 |
| 37 | 6 | 0 | -0.850087 | 3.519775  | -0.048528 |
| 38 | 1 | 0 | -0.789187 | 4.028536  | -1.023382 |
| 39 | 1 | 0 | -1.865685 | 3.129523  | 0.058240  |
| 40 | 6 | 0 | -0.557002 | 4.497478  | 1.077683  |
| 41 | 1 | 0 | -1.314392 | 5.283475  | 1.094574  |
| 42 | 1 | 0 | -0.571413 | 3.983826  | 2.042165  |
| 43 | 1 | 0 | 0.417291  | 4.975137  | 0.953372  |
| 44 | 7 | 0 | -4.757208 | -1.839733 | 0.327539  |
| 45 | 8 | 0 | -5.779454 | -1.690560 | -0.309228 |
| 46 | 8 | 0 | -4.632251 | -2.628139 | 1.241559  |

### Structure 21b (<sup>2</sup>E ax-ec) (M06-2X, DMSO)

Energy (Hartrees): = - 1220.6594914  
 No imaginary frequencies

Standard orientation:

| Center<br>Number | Atomic<br>Number | Atomic<br>Type | Coordinates (Angstroms) |           |           |
|------------------|------------------|----------------|-------------------------|-----------|-----------|
|                  |                  |                | X                       | Y         | Z         |
| 1                | 6                | 0              | 2.008931                | -0.402543 | -0.671596 |
| 2                | 6                | 0              | 2.310212                | 0.876021  | -0.208964 |
| 3                | 6                | 0              | 3.626722                | 1.230665  | 0.054314  |
| 4                | 6                | 0              | 4.620466                | 0.288234  | -0.161686 |
| 5                | 6                | 0              | 4.351998                | -0.988450 | -0.636127 |
| 6                | 6                | 0              | 3.032843                | -1.324684 | -0.893231 |
| 7                | 1                | 0              | 1.518677                | 1.597423  | -0.050124 |
| 8                | 1                | 0              | 3.880650                | 2.217377  | 0.416786  |
| 9                | 1                | 0              | 5.156127                | -1.693025 | -0.798400 |
| 10               | 1                | 0              | 2.791451                | -2.316432 | -1.259678 |
| 11               | 6                | 0              | 0.590832                | -0.843783 | -0.915600 |
| 12               | 1                | 0              | 0.568240                | -1.475197 | -1.812758 |
| 13               | 7                | 0              | -0.020989               | -1.607470 | 0.162513  |
| 14               | 8                | 0              | -0.258373               | 0.282995  | -1.136765 |
| 15               | 6                | 0              | -1.607562               | -0.147937 | -0.884605 |
| 16               | 6                | 0              | -1.428813               | -1.557559 | -0.265460 |
| 17               | 1                | 0              | -2.096277               | -1.749865 | 0.570461  |
| 18               | 1                | 0              | -1.598527               | -2.318358 | -1.028984 |
| 19               | 1                | 0              | -2.145105               | -0.184641 | -1.835223 |
| 20               | 6                | 0              | -2.243240               | 0.887510  | 0.045079  |
| 21               | 1                | 0              | -1.934231               | 0.686638  | 1.080612  |
| 22               | 6                | 0              | -3.767122               | 0.958150  | 0.009868  |
| 23               | 1                | 0              | -4.072906               | 1.203306  | -1.016986 |
| 24               | 6                | 0              | -4.466382               | -0.335721 | 0.424159  |
| 25               | 1                | 0              | -4.028563               | -0.706357 | 1.356565  |
| 26               | 6                | 0              | -5.956370               | -0.137214 | 0.631893  |
| 27               | 1                | 0              | -6.384751               | -1.078748 | 0.991496  |
| 28               | 1                | 0              | -6.138662               | 0.650528  | 1.366018  |
| 29               | 8                | 0              | -1.825529               | 2.197320  | -0.327206 |
| 30               | 1                | 0              | -0.881889               | 2.140809  | -0.517410 |
| 31               | 8                | 0              | -4.180183               | 1.980051  | 0.902949  |
| 32               | 1                | 0              | -3.602353               | 2.731933  | 0.728793  |
| 33               | 8                | 0              | -4.264656               | -1.331263 | -0.569463 |
| 34               | 1                | 0              | -4.897569               | -1.121770 | -1.268680 |
| 35               | 8                | 0              | -6.491501               | 0.201993  | -0.644436 |
| 36               | 1                | 0              | -7.450371               | 0.148729  | -0.594188 |
| 37               | 6                | 0              | 0.189600                | -1.034705 | 1.511497  |
| 38               | 1                | 0              | 0.273694                | 0.059535  | 1.482019  |
| 39               | 1                | 0              | -0.705539               | -1.262335 | 2.093421  |
| 40               | 6                | 0              | 1.392683                | -1.638137 | 2.224913  |
| 41               | 1                | 0              | 1.410999                | -1.300996 | 3.264583  |
| 42               | 1                | 0              | 1.324761                | -2.728679 | 2.218350  |
| 43               | 1                | 0              | 2.339573                | -1.351187 | 1.764743  |
| 44               | 7                | 0              | 6.018736                | 0.660183  | 0.113887  |

|    |   |   |          |           |           |
|----|---|---|----------|-----------|-----------|
| 45 | 8 | 0 | 6.882914 | -0.153178 | -0.139408 |
| 46 | 8 | 0 | 6.232273 | 1.759988  | 0.580212  |

-----  
**Structure 21c ( $^5C_2$  ec-ec) (M06-2X, Gas Phase)**

Energy (Hartrees): = - 1220.6385534  
 No imaginary frequencies

Standard orientation:

| Center<br>Number | Atomic<br>Number | Atomic<br>Type | Coordinates (Angstroms) |           |           |
|------------------|------------------|----------------|-------------------------|-----------|-----------|
|                  |                  |                | X                       | Y         | Z         |
| 1                | 6                | 0              | -2.219797               | 1.499066  | 0.306715  |
| 2                | 6                | 0              | -1.225608               | 2.501555  | -0.271874 |
| 3                | 6                | 0              | -1.983801               | 0.150298  | -0.371682 |
| 4                | 1                | 0              | -1.350602               | 3.446965  | 0.254146  |
| 5                | 1                | 0              | -1.420387               | 2.667101  | -1.346700 |
| 6                | 1                | 0              | -3.244183               | 1.823360  | 0.133278  |
| 7                | 1                | 0              | -2.156422               | 0.235621  | -1.455839 |
| 8                | 8                | 0              | -0.614925               | -0.209383 | -0.154889 |
| 9                | 7                | 0              | 0.140733                | 2.013124  | -0.049972 |
| 10               | 6                | 0              | -2.800166               | -1.015262 | 0.183322  |
| 11               | 1                | 0              | -2.803042               | -0.934531 | 1.277636  |
| 12               | 6                | 0              | -4.232404               | -1.017418 | -0.327118 |
| 13               | 1                | 0              | -4.209876               | -1.114590 | -1.422480 |
| 14               | 6                | 0              | -5.008111               | -2.194377 | 0.236929  |
| 15               | 1                | 0              | -4.955465               | -2.158807 | 1.332272  |
| 16               | 1                | 0              | -4.579632               | -3.132203 | -0.123578 |
| 17               | 8                | 0              | -2.243487               | -2.244762 | -0.240568 |
| 18               | 1                | 0              | -1.289762               | -2.164866 | -0.136662 |
| 19               | 8                | 0              | -4.858088               | 0.190667  | 0.052649  |
| 20               | 1                | 0              | -5.804143               | 0.036227  | -0.049872 |
| 21               | 8                | 0              | -6.347039               | -2.012491 | -0.211666 |
| 22               | 1                | 0              | -6.912891               | -2.647790 | 0.229551  |
| 23               | 8                | 0              | -2.037650               | 1.401369  | 1.703001  |
| 24               | 1                | 0              | -1.087302               | 1.305838  | 1.835985  |
| 25               | 6                | 0              | 1.145057                | 2.975218  | -0.515735 |
| 26               | 1                | 0              | 1.038809                | 3.149285  | -1.601541 |
| 27               | 1                | 0              | 2.129650                | 2.532242  | -0.357778 |
| 28               | 6                | 0              | 1.675135                | 0.130477  | -0.455451 |
| 29               | 6                | 0              | 2.084112                | -0.100997 | 0.858238  |
| 30               | 6                | 0              | 2.513655                | -0.199574 | -1.514228 |
| 31               | 6                | 0              | 3.327668                | -0.652966 | 1.116970  |
| 32               | 1                | 0              | 1.417476                | 0.157542  | 1.671378  |
| 33               | 6                | 0              | 3.765876                | -0.753485 | -1.273920 |
| 34               | 1                | 0              | 2.190037                | -0.024329 | -2.533967 |
| 35               | 6                | 0              | 4.145178                | -0.967127 | 0.039547  |
| 36               | 1                | 0              | 3.675113                | -0.844855 | 2.122709  |
| 37               | 1                | 0              | 4.440741                | -1.019759 | -2.075455 |
| 38               | 6                | 0              | 0.302563                | 0.712554  | -0.696935 |
| 39               | 1                | 0              | 0.117458                | 0.799819  | -1.787012 |
| 40               | 6                | 0              | 1.082424                | 4.301168  | 0.231748  |
| 41               | 1                | 0              | 1.970916                | 4.891904  | 0.003997  |
| 42               | 1                | 0              | 0.212573                | 4.897932  | -0.044066 |
| 43               | 1                | 0              | 1.053148                | 4.120602  | 1.308145  |
| 44               | 7                | 0              | 5.475738                | -1.556020 | 0.306060  |
| 45               | 8                | 0              | 5.786305                | -1.729001 | 1.463091  |
| 46               | 8                | 0              | 6.167610                | -1.826053 | -0.649855 |

-----  
**Structure 21c ( $^5C_2$  ax-ec) (M06-2X, Gas Phase)**

Energy (Hartrees): = - 1220.6363429  
 No imaginary frequencies

Standard orientation:

| Center<br>Number | Atomic<br>Number | Atomic<br>Type | Coordinates (Angstroms) |           |           |
|------------------|------------------|----------------|-------------------------|-----------|-----------|
|                  |                  |                | X                       | Y         | Z         |
| 1                | 6                | 0              | 2.267144                | 1.631603  | 0.052255  |
| 2                | 6                | 0              | 1.184754                | 2.486841  | 0.728569  |
| 3                | 6                | 0              | 2.017911                | 0.167187  | 0.421297  |
| 4                | 1                | 0              | 1.286847                | 3.526522  | 0.416006  |
| 5                | 1                | 0              | 1.325110                | 2.447900  | 1.815122  |
| 6                | 1                | 0              | 3.259073                | 1.929865  | 0.388880  |
| 7                | 1                | 0              | 2.091753                | 0.037645  | 1.511621  |
| 8                | 8                | 0              | 0.678494                | -0.161119 | 0.019104  |
| 9                | 7                | 0              | -0.178894               | 2.028769  | 0.426870  |
| 10               | 6                | 0              | 2.921016                | -0.863079 | -0.254687 |
| 11               | 1                | 0              | 3.009090                | -0.611664 | -1.319725 |
| 12               | 6                | 0              | 4.313250                | -0.908957 | 0.356965  |
| 13               | 1                | 0              | 4.215959                | -1.164083 | 1.422567  |
| 14               | 6                | 0              | 5.163074                | -1.977597 | -0.307987 |
| 15               | 1                | 0              | 5.193092                | -1.783443 | -1.387566 |

|    |   |   |           |           |           |
|----|---|---|-----------|-----------|-----------|
| 16 | 1 | 0 | 4.735481  | -2.965520 | -0.122554 |
| 17 | 8 | 0 | 2.381445  | -2.158994 | -0.078906 |
| 18 | 1 | 0 | 1.427560  | -2.075697 | -0.177893 |
| 19 | 8 | 0 | 4.925802  | 0.352999  | 0.199736  |
| 20 | 1 | 0 | 5.866019  | 0.207693  | 0.355987  |
| 21 | 8 | 0 | 6.456860  | -1.838846 | 0.267754  |
| 22 | 1 | 0 | 7.074486  | -2.393254 | -0.211587 |
| 23 | 8 | 0 | 2.246542  | 1.797711  | -1.354464 |
| 24 | 1 | 0 | 1.487129  | 1.308769  | -1.687844 |
| 25 | 6 | 0 | -0.677276 | 2.414518  | -0.909259 |
| 26 | 1 | 0 | -0.682644 | 1.551300  | -1.589386 |
| 27 | 1 | 0 | 0.026096  | 3.131139  | -1.335438 |
| 28 | 6 | 0 | -1.655171 | 0.063255  | 0.495561  |
| 29 | 6 | 0 | -1.920103 | -0.791871 | -0.569327 |
| 30 | 6 | 0 | -2.682979 | 0.435963  | 1.362219  |
| 31 | 6 | 0 | -3.209191 | -1.265069 | -0.783188 |
| 32 | 1 | 0 | -1.115301 | -1.084833 | -1.230782 |
| 33 | 6 | 0 | -3.972201 | -0.031727 | 1.167811  |
| 34 | 1 | 0 | -2.467731 | 1.113708  | 2.180670  |
| 35 | 6 | 0 | -4.208952 | -0.873745 | 0.090301  |
| 36 | 1 | 0 | -3.448278 | -1.925458 | -1.605233 |
| 37 | 1 | 0 | -4.788563 | 0.240535  | 1.822166  |
| 38 | 6 | 0 | -0.274797 | 0.624123  | 0.739010  |
| 39 | 1 | 0 | -0.039983 | 0.518129  | 1.808137  |
| 40 | 6 | 0 | -2.066685 | 3.040286  | -0.859185 |
| 41 | 1 | 0 | -2.350999 | 3.405762  | -1.848687 |
| 42 | 1 | 0 | -2.820998 | 2.323943  | -0.532209 |
| 43 | 1 | 0 | -2.069433 | 3.881251  | -0.163496 |
| 44 | 7 | 0 | -5.582085 | -1.375766 | -0.129560 |
| 45 | 8 | 0 | -6.438330 | -1.013610 | 0.645871  |
| 46 | 8 | 0 | -5.761524 | -2.115842 | -1.070604 |

-----

### Structure 21c (<sup>5</sup>C<sub>2</sub> ec-ec) (M06-2X, Benzene)

Energy (Hartrees): = - 1220.6617263  
 No imaginary frequencies

Standard orientation:

| Center<br>Number | Atomic<br>Number | Atomic<br>Type | Coordinates (Angstroms) |           |           |
|------------------|------------------|----------------|-------------------------|-----------|-----------|
|                  |                  |                | X                       | Y         | Z         |
| 1                | 6                | 0              | -2.216907               | 1.505371  | 0.290627  |
| 2                | 6                | 0              | -1.222495               | 2.504378  | -0.293152 |
| 3                | 6                | 0              | -1.982804               | 0.155231  | -0.383895 |
| 4                | 1                | 0              | -1.345947               | 3.453525  | 0.226848  |
| 5                | 1                | 0              | -1.419816               | 2.663133  | -1.367853 |
| 6                | 1                | 0              | -3.240002               | 1.833310  | 0.116509  |
| 7                | 1                | 0              | -2.152768               | 0.241790  | -1.468123 |
| 8                | 8                | 0              | -0.614715               | -0.205779 | -0.162563 |
| 9                | 7                | 0              | 0.143903                | 2.016312  | -0.069670 |
| 10               | 6                | 0              | -2.796901               | -1.014669 | 0.164278  |
| 11               | 1                | 0              | -2.771701               | -0.965425 | 1.260085  |
| 12               | 6                | 0              | -4.243846               | -0.996501 | -0.303915 |
| 13               | 1                | 0              | -4.257822               | -1.014878 | -1.403800 |
| 14               | 6                | 0              | -4.996738               | -2.215005 | 0.201179  |
| 15               | 1                | 0              | -4.904079               | -2.264986 | 1.293133  |
| 16               | 1                | 0              | -4.586691               | -3.125287 | -0.242241 |
| 17               | 8                | 0              | -2.252738               | -2.235840 | -0.304604 |
| 18               | 1                | 0              | -1.296469               | -2.156341 | -0.219252 |
| 19               | 8                | 0              | -4.867206               | 0.177064  | 0.179518  |
| 20               | 1                | 0              | -5.814877               | 0.012895  | 0.106126  |
| 21               | 8                | 0              | -6.353194               | -2.008179 | -0.181991 |
| 22               | 1                | 0              | -6.902248               | -2.656286 | 0.264929  |
| 23               | 8                | 0              | -2.034017               | 1.411135  | 1.688717  |
| 24               | 1                | 0              | -1.083221               | 1.308404  | 1.818208  |
| 25               | 6                | 0              | 1.147755                | 2.978364  | -0.540002 |
| 26               | 1                | 0              | 1.034202                | 3.156859  | -1.623653 |
| 27               | 1                | 0              | 2.132802                | 2.533733  | -0.389321 |
| 28               | 6                | 0              | 1.676801                | 0.128268  | -0.459536 |
| 29               | 6                | 0              | 2.093276                | -0.066909 | 0.858016  |
| 30               | 6                | 0              | 2.505191                | -0.239054 | -1.514469 |
| 31               | 6                | 0              | 3.334366                | -0.619799 | 1.124975  |
| 32               | 1                | 0              | 1.438033                | 0.222518  | 1.670367  |
| 33               | 6                | 0              | 3.754708                | -0.794996 | -1.266116 |
| 34               | 1                | 0              | 2.177143                | -0.090842 | -2.537085 |
| 35               | 6                | 0              | 4.141777                | -0.972941 | 0.051133  |
| 36               | 1                | 0              | 3.681861                | -0.780108 | 2.136295  |
| 37               | 1                | 0              | 4.418023                | -1.086614 | -2.068706 |
| 38               | 6                | 0              | 0.306332                | 0.712962  | -0.710599 |
| 39               | 1                | 0              | 0.124120                | 0.791990  | -1.800427 |
| 40               | 6                | 0              | 1.093553                | 4.300698  | 0.212644  |
| 41               | 1                | 0              | 1.982685                | 4.889992  | -0.019821 |
| 42               | 1                | 0              | 0.224095                | 4.902911  | -0.054106 |
| 43               | 1                | 0              | 1.073632                | 4.119033  | 1.289716  |
| 44               | 7                | 0              | 5.469425                | -1.558565 | 0.325501  |

|    |   |   |          |           |           |
|----|---|---|----------|-----------|-----------|
| 45 | 8 | 0 | 5.788976 | -1.708730 | 1.484621  |
| 46 | 8 | 0 | 6.161810 | -1.852914 | -0.624406 |

-----

**Structure 21c (<sup>5</sup>C<sub>2</sub> ax-ec) (M06-2X, Benzene)**

Energy (Hartrees): = - 1220.6589075  
 No imaginary frequencies

Standard orientation:

| Center<br>Number | Atomic<br>Number | Atomic<br>Type | Coordinates (Angstroms) |           |           |
|------------------|------------------|----------------|-------------------------|-----------|-----------|
|                  |                  |                | X                       | Y         | Z         |
| 1                | 6                | 0              | 2.269292                | 1.636659  | 0.070326  |
| 2                | 6                | 0              | 1.182040                | 2.493118  | 0.736766  |
| 3                | 6                | 0              | 2.016178                | 0.171268  | 0.432646  |
| 4                | 1                | 0              | 1.288566                | 3.533147  | 0.426353  |
| 5                | 1                | 0              | 1.314876                | 2.451360  | 1.823846  |
| 6                | 1                | 0              | 3.256430                | 1.935821  | 0.420100  |
| 7                | 1                | 0              | 2.086637                | 0.037927  | 1.522277  |
| 8                | 8                | 0              | 0.677537                | -0.152495 | 0.023522  |
| 9                | 7                | 0              | -0.180472               | 2.037059  | 0.424250  |
| 10               | 6                | 0              | 2.916042                | -0.860127 | -0.247751 |
| 11               | 1                | 0              | 3.000313                | -0.610081 | -1.313193 |
| 12               | 6                | 0              | 4.311326                | -0.916016 | 0.356904  |
| 13               | 1                | 0              | 4.218715                | -1.167567 | 1.423619  |
| 14               | 6                | 0              | 5.152320                | -1.989009 | -0.312186 |
| 15               | 1                | 0              | 5.180801                | -1.796994 | -1.392078 |
| 16               | 1                | 0              | 4.724585                | -2.977226 | -0.127255 |
| 17               | 8                | 0              | 2.367511                | -2.154420 | -0.073892 |
| 18               | 1                | 0              | 1.414179                | -2.061524 | -0.175153 |
| 19               | 8                | 0              | 4.934444                | 0.342015  | 0.195013  |
| 20               | 1                | 0              | 5.874836                | 0.184665  | 0.341578  |
| 21               | 8                | 0              | 6.450848                | -1.861670 | 0.257817  |
| 22               | 1                | 0              | 7.066244                | -2.393194 | -0.252390 |
| 23               | 8                | 0              | 2.266763                | 1.806463  | -1.338029 |
| 24               | 1                | 0              | 1.503922                | 1.328183  | -1.680468 |
| 25               | 6                | 0              | -0.666110               | 2.418686  | -0.918326 |
| 26               | 1                | 0              | -0.658205               | 1.556442  | -1.599849 |
| 27               | 1                | 0              | 0.035358                | 3.142903  | -1.334572 |
| 28               | 6                | 0              | -1.657745               | 0.069713  | 0.495845  |
| 29               | 6                | 0              | -1.915623               | -0.805550 | -0.554718 |
| 30               | 6                | 0              | -2.692768               | 0.461898  | 1.346088  |
| 31               | 6                | 0              | -3.202945               | -1.282699 | -0.768647 |
| 32               | 1                | 0              | -1.109310               | -1.113302 | -1.207517 |
| 33               | 6                | 0              | -3.980467               | -0.009403 | 1.151789  |
| 34               | 1                | 0              | -2.486123               | 1.155716  | 2.153320  |
| 35               | 6                | 0              | -4.209582               | -0.874156 | 0.089892  |
| 36               | 1                | 0              | -3.429454               | -1.959265 | -1.581142 |
| 37               | 1                | 0              | -4.797076               | 0.280421  | 1.798418  |
| 38               | 6                | 0              | -0.278077               | 0.632609  | 0.741071  |
| 39               | 1                | 0              | -0.045705               | 0.530905  | 1.810448  |
| 40               | 6                | 0              | -2.058319               | 3.037649  | -0.887018 |
| 41               | 1                | 0              | -2.325531               | 3.411812  | -1.878676 |
| 42               | 1                | 0              | -2.819277               | 2.317815  | -0.582867 |
| 43               | 1                | 0              | -2.079311               | 3.873700  | -0.184756 |
| 44               | 7                | 0              | -5.577885               | -1.381407 | -0.128837 |
| 45               | 8                | 0              | -6.433648               | -1.049725 | 0.662753  |
| 46               | 8                | 0              | -5.765996               | -2.100052 | -1.086438 |

-----

**Structure 21c (<sup>5</sup>C<sub>2</sub> ec-ec) (M06-2X, DMSO)**

Energy (Hartrees): = - 1220.6663214  
 No imaginary frequencies

Standard orientation:

| Center<br>Number | Atomic<br>Number | Atomic<br>Type | Coordinates (Angstroms) |           |           |
|------------------|------------------|----------------|-------------------------|-----------|-----------|
|                  |                  |                | X                       | Y         | Z         |
| 1                | 6                | 0              | -2.206856               | 1.505927  | 0.303387  |
| 2                | 6                | 0              | -1.217413               | 2.506968  | -0.282940 |
| 3                | 6                | 0              | -1.982846               | 0.164540  | -0.388826 |
| 4                | 1                | 0              | -1.336868               | 3.457529  | 0.235733  |
| 5                | 1                | 0              | -1.420715               | 2.662200  | -1.355764 |
| 6                | 1                | 0              | -3.229944               | 1.841016  | 0.143825  |
| 7                | 1                | 0              | -2.157845               | 0.270564  | -1.469573 |
| 8                | 8                | 0              | -0.615240               | -0.204801 | -0.176586 |
| 9                | 7                | 0              | 0.150505                | 2.017206  | -0.066759 |
| 10               | 6                | 0              | -2.796447               | -1.012168 | 0.143052  |
| 11               | 1                | 0              | -2.751121               | -0.999474 | 1.239293  |
| 12               | 6                | 0              | -4.253320               | -0.970713 | -0.291627 |
| 13               | 1                | 0              | -4.293383               | -0.911016 | -1.389131 |
| 14               | 6                | 0              | -4.993392               | -2.221722 | 0.149722  |



|    |   |   |           |           |           |
|----|---|---|-----------|-----------|-----------|
| 15 | 1 | 0 | -4.876467 | -2.345448 | 1.233133  |
| 16 | 1 | 0 | -4.595415 | -3.101291 | -0.361194 |
| 17 | 8 | 0 | -2.264180 | -2.223323 | -0.370583 |
| 18 | 1 | 0 | -1.305447 | -2.131071 | -0.326733 |
| 19 | 8 | 0 | -4.870885 | 0.165922  | 0.286158  |
| 20 | 1 | 0 | -5.818966 | -0.003857 | 0.223388  |
| 21 | 8 | 0 | -6.359867 | -1.998475 | -0.188984 |
| 22 | 1 | 0 | -6.896793 | -2.652506 | 0.267880  |
| 23 | 8 | 0 | -2.006963 | 1.394470  | 1.701821  |
| 24 | 1 | 0 | -1.055318 | 1.269719  | 1.812818  |
| 25 | 6 | 0 | 1.147835  | 2.981436  | -0.551559 |
| 26 | 1 | 0 | 1.011169  | 3.164840  | -1.630454 |
| 27 | 1 | 0 | 2.135631  | 2.535368  | -0.422804 |
| 28 | 6 | 0 | 1.676609  | 0.129763  | -0.463517 |
| 29 | 6 | 0 | 2.077390  | -0.088217 | 0.855880  |
| 30 | 6 | 0 | 2.518043  | -0.214330 | -1.516319 |
| 31 | 6 | 0 | 3.316003  | -0.644681 | 1.127475  |
| 32 | 1 | 0 | 1.414527  | 0.183188  | 1.669022  |
| 33 | 6 | 0 | 3.765674  | -0.772555 | -1.263416 |
| 34 | 1 | 0 | 2.202265  | -0.044122 | -2.539403 |
| 35 | 6 | 0 | 4.136683  | -0.975393 | 0.055762  |
| 36 | 1 | 0 | 3.645969  | -0.821018 | 2.142175  |
| 37 | 1 | 0 | 4.434730  | -1.044173 | -2.068429 |
| 38 | 6 | 0 | 0.309183  | 0.718398  | -0.720156 |
| 39 | 1 | 0 | 0.130543  | 0.805693  | -1.807656 |
| 40 | 6 | 0 | 1.109226  | 4.298229  | 0.211006  |
| 41 | 1 | 0 | 1.991773  | 4.890170  | -0.040209 |
| 42 | 1 | 0 | 0.231155  | 4.898681  | -0.030950 |
| 43 | 1 | 0 | 1.116621  | 4.111235  | 1.287919  |
| 44 | 7 | 0 | 5.457584  | -1.566234 | 0.334974  |
| 45 | 8 | 0 | 5.761054  | -1.754479 | 1.494705  |
| 46 | 8 | 0 | 6.172211  | -1.832555 | -0.608774 |

-----

### Structure 21c (<sup>5</sup>C<sub>2</sub> ax-ec) (M06-2X, DMSO)

Energy (Hartrees): = - 1220.6637384  
 No imaginary frequencies

Standard orientation:

| Center<br>Number | Atomic<br>Number | Atomic<br>Type | Coordinates (Angstroms) |           |           |
|------------------|------------------|----------------|-------------------------|-----------|-----------|
|                  |                  |                | X                       | Y         | Z         |
| 1                | 6                | 0              | 2.262001                | 1.637971  | 0.089412  |
| 2                | 6                | 0              | 1.170124                | 2.480027  | 0.764776  |
| 3                | 6                | 0              | 2.016844                | 0.169587  | 0.437274  |
| 4                | 1                | 0              | 1.268013                | 3.524574  | 0.465964  |
| 5                | 1                | 0              | 1.308654                | 2.421307  | 1.849890  |
| 6                | 1                | 0              | 3.243930                | 1.940331  | 0.451942  |
| 7                | 1                | 0              | 2.089340                | 0.033854  | 1.525769  |
| 8                | 8                | 0              | 0.680479                | -0.160680 | 0.027058  |
| 9                | 7                | 0              | -0.192216               | 2.018498  | 0.452610  |
| 10               | 6                | 0              | 2.922428                | -0.853026 | -0.246139 |
| 11               | 1                | 0              | 2.986267                | -0.621954 | -1.317131 |
| 12               | 6                | 0              | 4.330155                | -0.873242 | 0.332312  |
| 13               | 1                | 0              | 4.262432                | -1.026767 | 1.419363  |
| 14               | 6                | 0              | 5.151064                | -2.005170 | -0.261177 |
| 15               | 1                | 0              | 5.147097                | -1.918664 | -1.354537 |
| 16               | 1                | 0              | 4.733991                | -2.972056 | 0.028606  |
| 17               | 8                | 0              | 2.390987                | -2.152595 | -0.043943 |
| 18               | 1                | 0              | 1.436299                | -2.069732 | -0.150338 |
| 19               | 8                | 0              | 4.961063                | 0.361791  | 0.046057  |
| 20               | 1                | 0              | 5.904084                | 0.197347  | 0.170639  |
| 21               | 8                | 0              | 6.468674                | -1.832327 | 0.253795  |
| 22               | 1                | 0              | 7.069336                | -2.381805 | -0.258423 |
| 23               | 8                | 0              | 2.268576                | 1.826273  | -1.318934 |
| 24               | 1                | 0              | 1.508618                | 1.349731  | -1.672942 |
| 25               | 6                | 0              | -0.673963               | 2.396699  | -0.892908 |
| 26               | 1                | 0              | -0.624202               | 1.546203  | -1.586908 |
| 27               | 1                | 0              | 0.003406                | 3.154658  | -1.288126 |
| 28               | 6                | 0              | -1.653591               | 0.042933  | 0.510431  |
| 29               | 6                | 0              | -1.931518               | -0.750011 | -0.599510 |
| 30               | 6                | 0              | -2.669228               | 0.364513  | 1.411960  |
| 31               | 6                | 0              | -3.223566               | -1.208565 | -0.824576 |
| 32               | 1                | 0              | -1.140708               | -1.008661 | -1.291745 |
| 33               | 6                | 0              | -3.962026               | -0.087258 | 1.205812  |
| 34               | 1                | 0              | -2.443752               | 0.981703  | 2.274740  |
| 35               | 6                | 0              | -4.213334               | -0.863268 | 0.081637  |
| 36               | 1                | 0              | -3.461029               | -1.820221 | -1.684405 |
| 37               | 1                | 0              | -4.760835               | 0.152749  | 1.893873  |
| 38               | 6                | 0              | -0.276643               | 0.607436  | 0.760027  |
| 39               | 1                | 0              | -0.041255               | 0.498747  | 1.827057  |
| 40               | 6                | 0              | -2.088977               | 2.962883  | -0.874795 |
| 41               | 1                | 0              | -2.358272               | 3.326795  | -1.869947 |
| 42               | 1                | 0              | -2.826989               | 2.215168  | -0.579111 |
| 43               | 1                | 0              | -2.149908               | 3.799540  | -0.174605 |

|    |   |   |           |           |           |
|----|---|---|-----------|-----------|-----------|
| 44 | 7 | 0 | -5.585078 | -1.345508 | -0.151654 |
| 45 | 8 | 0 | -6.439829 | -1.038440 | 0.653434  |
| 46 | 8 | 0 | -5.788962 | -2.024377 | -1.136658 |

**Structure 21d ( $^5C_2$  ec-ax) (M06-2X, Gas Phase)**

Energy (Hartrees): = - 1220.6359682  
No imaginary frequencies

Standard orientation:

| Center<br>Number | Atomic<br>Number | Atomic<br>Type | Coordinates (Angstroms) |           |           |
|------------------|------------------|----------------|-------------------------|-----------|-----------|
|                  |                  |                | X                       | Y         | Z         |
| 1                | 6                | 0              | -1.834210               | 1.257363  | -0.877743 |
| 2                | 6                | 0              | -0.567846               | 2.046378  | -1.222260 |
| 3                | 6                | 0              | -1.445538               | 0.141323  | 0.098526  |
| 4                | 1                | 0              | -0.842760               | 2.898944  | -1.845448 |
| 5                | 1                | 0              | 0.144481                | 1.419012  | -1.781545 |
| 6                | 1                | 0              | -2.286270               | 0.818917  | -1.765258 |
| 7                | 1                | 0              | -0.719981               | -0.530854 | -0.380939 |
| 8                | 8                | 0              | -0.842532               | 0.740438  | 1.257253  |
| 9                | 7                | 0              | -0.018787               | 2.539934  | 0.032934  |
| 10               | 6                | 0              | -2.617071               | -0.681468 | 0.639355  |
| 11               | 1                | 0              | -3.460957               | -0.001642 | 0.812249  |
| 12               | 6                | 0              | -3.035771               | -1.783942 | -0.318892 |
| 13               | 1                | 0              | -2.192765               | -2.481784 | -0.428196 |
| 14               | 6                | 0              | -4.225050               | -2.557654 | 0.220230  |
| 15               | 1                | 0              | -5.045565               | -1.854718 | 0.411477  |
| 16               | 1                | 0              | -3.950247               | -3.066038 | 1.147614  |
| 17               | 8                | 0              | -2.242147               | -1.343647 | 1.835043  |
| 18               | 1                | 0              | -1.820865               | -0.680478 | 2.390783  |
| 19               | 8                | 0              | -3.366643               | -1.206075 | -1.564491 |
| 20               | 1                | 0              | -3.847788               | -1.887107 | -2.048323 |
| 21               | 8                | 0              | -4.574629               | -3.476605 | -0.808643 |
| 22               | 1                | 0              | -5.406727               | -3.895520 | -0.583803 |
| 23               | 8                | 0              | -2.784708               | 2.123198  | -0.297437 |
| 24               | 1                | 0              | -2.311075               | 2.582577  | 0.407555  |
| 25               | 6                | 0              | 0.762782                | 3.768101  | 0.000434  |
| 26               | 1                | 0              | 1.395148                | 3.811547  | -0.897850 |
| 27               | 1                | 0              | 1.440909                | 3.769916  | 0.859246  |
| 28               | 6                | 0              | 1.464785                | 0.550911  | 0.561135  |
| 29               | 6                | 0              | 2.501817                | 0.991866  | -0.258918 |
| 30               | 6                | 0              | 1.504982                | -0.746952 | 1.076785  |
| 31               | 6                | 0              | 3.573035                | 0.160454  | -0.559481 |
| 32               | 1                | 0              | 2.475772                | 1.989631  | -0.676560 |
| 33               | 6                | 0              | 2.565595                | -1.591737 | 0.785791  |
| 34               | 1                | 0              | 0.681449                | -1.101376 | 1.685647  |
| 35               | 6                | 0              | 3.583983                | -1.116827 | -0.026127 |
| 36               | 1                | 0              | 4.386940                | 0.480559  | -1.195086 |
| 37               | 1                | 0              | 2.615157                | -2.601517 | 1.169183  |
| 38               | 6                | 0              | 0.319424                | 1.492108  | 0.963803  |
| 39               | 1                | 0              | 0.600342                | 1.968241  | 1.908267  |
| 40               | 6                | 0              | -0.138223               | 4.998352  | 0.048799  |
| 41               | 1                | 0              | 0.447503                | 5.917378  | -0.022789 |
| 42               | 1                | 0              | -0.853359               | 4.984423  | -0.776537 |
| 43               | 1                | 0              | -0.702868               | 5.013216  | 0.982577  |
| 44               | 7                | 0              | 4.719072                | -2.009493 | -0.341763 |
| 45               | 8                | 0              | 5.589158                | -1.571858 | -1.061464 |
| 46               | 8                | 0              | 4.705922                | -3.119960 | 0.139853  |

**Structure 21d ( $^5C_2$  ax-ax) (M06-2X, Gas Phase)**

Energy (Hartrees): = - 1220.6399453  
No imaginary frequencies

Standard orientation:

| Center<br>Number | Atomic<br>Number | Atomic<br>Type | Coordinates (Angstroms) |           |           |
|------------------|------------------|----------------|-------------------------|-----------|-----------|
|                  |                  |                | X                       | Y         | Z         |
| 1                | 6                | 0              | -1.845524               | 1.221889  | -1.044859 |
| 2                | 6                | 0              | -0.565548               | 1.954735  | -1.464133 |
| 3                | 6                | 0              | -1.453793               | 0.193434  | 0.015213  |
| 4                | 1                | 0              | -0.804972               | 2.744665  | -2.176619 |
| 5                | 1                | 0              | 0.106711                | 1.244896  | -1.960457 |
| 6                | 1                | 0              | -2.300517               | 0.717140  | -1.896011 |
| 7                | 1                | 0              | -0.722163               | -0.506054 | -0.409433 |
| 8                | 8                | 0              | -0.851313               | 0.913373  | 1.104145  |
| 9                | 7                | 0              | 0.145976                | 2.549303  | -0.327199 |
| 10               | 6                | 0              | -2.597387               | -0.609997 | 0.638142  |
| 11               | 1                | 0              | -3.459303               | 0.053751  | 0.787007  |
| 12               | 6                | 0              | -3.014903               | -1.778898 | -0.238615 |
| 13               | 1                | 0              | -2.151095               | -2.450292 | -0.352570 |

|    |   |   |           |           |           |
|----|---|---|-----------|-----------|-----------|
| 14 | 6 | 0 | -4.147268 | -2.568215 | 0.394161  |
| 15 | 1 | 0 | -4.983799 | -1.887505 | 0.596652  |
| 16 | 1 | 0 | -3.808862 | -3.024753 | 1.327469  |
| 17 | 8 | 0 | -2.175011 | -1.180089 | 1.864354  |
| 18 | 1 | 0 | -1.735749 | -0.476694 | 2.353768  |
| 19 | 8 | 0 | -3.423902 | -1.276612 | -1.493000 |
| 20 | 1 | 0 | -3.901350 | -1.997515 | -1.919580 |
| 21 | 8 | 0 | -4.510717 | -3.543410 | -0.575709 |
| 22 | 1 | 0 | -5.313753 | -3.982984 | -0.291972 |
| 23 | 8 | 0 | -2.807913 | 2.127766  | -0.534858 |
| 24 | 1 | 0 | -2.530424 | 2.357636  | 0.357815  |
| 25 | 6 | 0 | -0.357894 | 3.841726  | 0.155400  |
| 26 | 1 | 0 | -1.058237 | 3.715561  | 0.994481  |
| 27 | 1 | 0 | -0.925803 | 4.308389  | -0.650507 |
| 28 | 6 | 0 | 1.469614  | 0.602867  | 0.418096  |
| 29 | 6 | 0 | 2.544791  | 0.996802  | -0.376985 |
| 30 | 6 | 0 | 1.461406  | -0.669851 | 0.991705  |
| 31 | 6 | 0 | 3.606429  | 0.131489  | -0.604073 |
| 32 | 1 | 0 | 2.532733  | 1.985767  | -0.818508 |
| 33 | 6 | 0 | 2.513675  | -1.546547 | 0.772008  |
| 34 | 1 | 0 | 0.612611  | -0.982665 | 1.589031  |
| 35 | 6 | 0 | 3.568506  | -1.125039 | -0.022624 |
| 36 | 1 | 0 | 4.451877  | 0.409192  | -1.218359 |
| 37 | 1 | 0 | 2.529025  | -2.540248 | 1.197583  |
| 38 | 6 | 0 | 0.351893  | 1.593928  | 0.728075  |
| 39 | 1 | 0 | 0.638191  | 2.140411  | 1.630746  |
| 40 | 6 | 0 | 0.791439  | 4.746576  | 0.581792  |
| 41 | 1 | 0 | 0.416373  | 5.698260  | 0.964300  |
| 42 | 1 | 0 | 1.388885  | 4.280514  | 1.369717  |
| 43 | 1 | 0 | 1.448801  | 4.942217  | -0.266849 |
| 44 | 7 | 0 | 4.693539  | -2.053343 | -0.262990 |
| 45 | 8 | 0 | 5.595759  | -1.665490 | -0.971401 |
| 46 | 8 | 0 | 4.640795  | -3.141887 | 0.264443  |

-----

**Structure 21d (<sup>5</sup>C<sub>2</sub> ec-ax) (M06-2X, Benzene)**

Energy (Hartrees): = - 1220.6586157

No imaginary frequencies

Standard orientation:

| Center<br>Number | Atomic<br>Number | Atomic<br>Type | Coordinates (Angstroms) |           |           |
|------------------|------------------|----------------|-------------------------|-----------|-----------|
|                  |                  |                | X                       | Y         | Z         |
| 1                | 6                | 0              | -1.818399               | 1.255960  | -0.882154 |
| 2                | 6                | 0              | -0.546996               | 2.038157  | -1.221381 |
| 3                | 6                | 0              | -1.441048               | 0.136603  | 0.094390  |
| 4                | 1                | 0              | -0.812419               | 2.890604  | -1.848692 |
| 5                | 1                | 0              | 0.163277                | 1.405175  | -1.776197 |
| 6                | 1                | 0              | -2.268965               | 0.822524  | -1.772893 |
| 7                | 1                | 0              | -0.721419               | -0.541468 | -0.385835 |
| 8                | 8                | 0              | -0.833846               | 0.728528  | 1.254561  |
| 9                | 7                | 0              | -0.004336               | 2.530761  | 0.036581  |
| 10               | 6                | 0              | -2.619285               | -0.676353 | 0.637078  |
| 11               | 1                | 0              | -3.450103               | 0.012948  | 0.833609  |
| 12               | 6                | 0              | -3.075371               | -1.758781 | -0.328075 |
| 13               | 1                | 0              | -2.239618               | -2.456024 | -0.486009 |
| 14               | 6                | 0              | -4.247440               | -2.541768 | 0.236171  |
| 15               | 1                | 0              | -5.059637               | -1.844737 | 0.478125  |
| 16               | 1                | 0              | -3.944805               | -3.078900 | 1.138476  |
| 17               | 8                | 0              | -2.236695               | -1.358930 | 1.820411  |
| 18               | 1                | 0              | -1.780502               | -0.711469 | 2.368239  |
| 19               | 8                | 0              | -3.452990               | -1.155018 | -1.549666 |
| 20               | 1                | 0              | -3.963427               | -1.823952 | -2.021199 |
| 21               | 8                | 0              | -4.640473               | -3.435009 | -0.801069 |
| 22               | 1                | 0              | -5.482688               | -3.830313 | -0.565302 |
| 23               | 8                | 0              | -2.766593               | 2.128662  | -0.303855 |
| 24               | 1                | 0              | -2.283253               | 2.597815  | 0.389086  |
| 25               | 6                | 0              | 0.778723                | 3.760162  | 0.008734  |
| 26               | 1                | 0              | 1.410944                | 3.804211  | -0.888945 |
| 27               | 1                | 0              | 1.454328                | 3.760655  | 0.869403  |
| 28               | 6                | 0              | 1.478042                | 0.541718  | 0.565967  |
| 29               | 6                | 0              | 2.520404                | 0.987781  | -0.245397 |
| 30               | 6                | 0              | 1.515501                | -0.760037 | 1.071965  |
| 31               | 6                | 0              | 3.590610                | 0.156794  | -0.549024 |
| 32               | 1                | 0              | 2.500923                | 1.988820  | -0.655470 |
| 33               | 6                | 0              | 2.573842                | -1.605920 | 0.776725  |
| 34               | 1                | 0              | 0.693707                | -1.119027 | 1.680095  |
| 35               | 6                | 0              | 3.595969                | -1.126823 | -0.028976 |
| 36               | 1                | 0              | 4.405065                | 0.487169  | -1.178768 |
| 37               | 1                | 0              | 2.613441                | -2.618241 | 1.154799  |
| 38               | 6                | 0              | 0.330785                | 1.482266  | 0.966942  |
| 39               | 1                | 0              | 0.609115                | 1.955564  | 1.913234  |
| 40               | 6                | 0              | -0.121029               | 4.989899  | 0.059764  |
| 41               | 1                | 0              | 0.467159                | 5.908330  | -0.010459 |
| 42               | 1                | 0              | -0.837264               | 4.983305  | -0.765417 |

|    |   |   |           |           |           |
|----|---|---|-----------|-----------|-----------|
| 43 | 1 | 0 | -0.684146 | 5.007752  | 0.995233  |
| 44 | 7 | 0 | 4.726036  | -2.018412 | -0.351735 |
| 45 | 8 | 0 | 5.617723  | -1.569869 | -1.039687 |
| 46 | 8 | 0 | 4.696941  | -3.146504 | 0.089876  |

-----  
**Structure 21d (<sup>5</sup>C<sub>2</sub> ax-ax) (M06-2X, Benece)**

Energy (Hartrees): = - 1220.662224  
 No imaginary frequencies

Standard orientation:

| Center<br>Number | Atomic<br>Number | Atomic<br>Type | Coordinates (Angstroms) |           |           |
|------------------|------------------|----------------|-------------------------|-----------|-----------|
|                  |                  |                | X                       | Y         | Z         |
| 1                | 6                | 0              | -1.840570               | 1.222115  | -1.049810 |
| 2                | 6                | 0              | -0.560386               | 1.956736  | -1.464293 |
| 3                | 6                | 0              | -1.452622               | 0.191438  | 0.009667  |
| 4                | 1                | 0              | -0.796479               | 2.747512  | -2.176863 |
| 5                | 1                | 0              | 0.109130                | 1.245103  | -1.961586 |
| 6                | 1                | 0              | -2.289440               | 0.719460  | -1.905648 |
| 7                | 1                | 0              | -0.724479               | -0.510148 | -0.417442 |
| 8                | 8                | 0              | -0.846298               | 0.906656  | 1.099260  |
| 9                | 7                | 0              | 0.151217                | 2.547696  | -0.325848 |
| 10               | 6                | 0              | -2.598442               | -0.608192 | 0.635346  |
| 11               | 1                | 0              | -3.452600               | 0.061018  | 0.801571  |
| 12               | 6                | 0              | -3.039077               | -1.765727 | -0.246261 |
| 13               | 1                | 0              | -2.176937               | -2.430378 | -0.404365 |
| 14               | 6                | 0              | -4.146071               | -2.574495 | 0.406695  |
| 15               | 1                | 0              | -4.983375               | -1.908477 | 0.650515  |
| 16               | 1                | 0              | -3.778973               | -3.049999 | 1.319531  |
| 17               | 8                | 0              | -2.167098               | -1.189532 | 1.854743  |
| 18               | 1                | 0              | -1.706716               | -0.493731 | 2.336867  |
| 19               | 8                | 0              | -3.494392               | -1.243849 | -1.478517 |
| 20               | 1                | 0              | -3.987106               | -1.960178 | -1.896302 |
| 21               | 8                | 0              | -4.533324               | -3.536912 | -0.568608 |
| 22               | 1                | 0              | -5.340176               | -3.966385 | -0.275551 |
| 23               | 8                | 0              | -2.810539               | 2.124687  | -0.543723 |
| 24               | 1                | 0              | -2.528272               | 2.370736  | 0.343710  |
| 25               | 6                | 0              | -0.350252               | 3.840802  | 0.160602  |
| 26               | 1                | 0              | -1.062187               | 3.713817  | 0.989481  |
| 27               | 1                | 0              | -0.900169               | 4.319976  | -0.650639 |
| 28               | 6                | 0              | 1.477594                | 0.600737  | 0.415913  |
| 29               | 6                | 0              | 2.552459                | 0.994698  | -0.380443 |
| 30               | 6                | 0              | 1.472771                | -0.671554 | 0.990799  |
| 31               | 6                | 0              | 3.614043                | 0.130000  | -0.608511 |
| 32               | 1                | 0              | 2.544140                | 1.982693  | -0.824196 |
| 33               | 6                | 0              | 2.525299                | -1.547718 | 0.772421  |
| 34               | 1                | 0              | 0.627141                | -0.986451 | 1.591168  |
| 35               | 6                | 0              | 3.578845                | -1.126541 | -0.025272 |
| 36               | 1                | 0              | 4.455654                | 0.413465  | -1.225564 |
| 37               | 1                | 0              | 2.536185                | -2.539011 | 1.203903  |
| 38               | 6                | 0              | 0.357406                | 1.589889  | 0.726704  |
| 39               | 1                | 0              | 0.642701                | 2.132508  | 1.631745  |
| 40               | 6                | 0              | 0.796836                | 4.735158  | 0.610924  |
| 41               | 1                | 0              | 0.418355                | 5.684772  | 0.996914  |
| 42               | 1                | 0              | 1.381360                | 4.261303  | 1.404292  |
| 43               | 1                | 0              | 1.467335                | 4.940699  | -0.225866 |
| 44               | 7                | 0              | 4.701041                | -2.052792 | -0.268296 |
| 45               | 8                | 0              | 5.588192                | -1.681808 | -1.006275 |
| 46               | 8                | 0              | 4.669974                | -3.131331 | 0.283927  |

-----  
**Structure 21d (<sup>5</sup>C<sub>2</sub> ec-ax) (M06-2X, DMSO)**

Energy (Hartrees): = - 1220.6628257  
 No imaginary frequencies

Standard orientation:

| Center<br>Number | Atomic<br>Number | Atomic<br>Type | Coordinates (Angstroms) |           |           |
|------------------|------------------|----------------|-------------------------|-----------|-----------|
|                  |                  |                | X                       | Y         | Z         |
| 1                | 6                | 0              | -1.808694               | 1.262596  | -0.875535 |
| 2                | 6                | 0              | -0.536628               | 2.044799  | -1.207124 |
| 3                | 6                | 0              | -1.436647               | 0.141328  | 0.099540  |
| 4                | 1                | 0              | -0.794612               | 2.898217  | -1.836403 |
| 5                | 1                | 0              | 0.175006                | 1.409662  | -1.756671 |
| 6                | 1                | 0              | -2.252828               | 0.833446  | -1.771449 |
| 7                | 1                | 0              | -0.715434               | -0.533744 | -0.382367 |
| 8                | 8                | 0              | -0.833549               | 0.727442  | 1.264031  |
| 9                | 7                | 0              | -0.003828               | 2.536144  | 0.055961  |
| 10               | 6                | 0              | -2.611532               | -0.679692 | 0.634391  |
| 11               | 1                | 0              | -3.438223               | 0.003873  | 0.865198  |
| 12               | 6                | 0              | -3.092897               | -1.730330 | -0.354298 |

|    |   |   |           |           |           |
|----|---|---|-----------|-----------|-----------|
| 13 | 1 | 0 | -2.245761 | -2.384781 | -0.606680 |
| 14 | 6 | 0 | -4.198472 | -2.583763 | 0.241088  |
| 15 | 1 | 0 | -5.016003 | -1.933118 | 0.574426  |
| 16 | 1 | 0 | -3.822181 | -3.156474 | 1.091786  |
| 17 | 8 | 0 | -2.210523 | -1.393969 | 1.794382  |
| 18 | 1 | 0 | -1.703646 | -0.770932 | 2.327855  |
| 19 | 8 | 0 | -3.576584 | -1.081489 | -1.517167 |
| 20 | 1 | 0 | -4.104229 | -1.746253 | -1.976824 |
| 21 | 8 | 0 | -4.631525 | -3.439927 | -0.812597 |
| 22 | 1 | 0 | -5.470434 | -3.834650 | -0.557327 |
| 23 | 8 | 0 | -2.760757 | 2.137481  | -0.298250 |
| 24 | 1 | 0 | -2.265405 | 2.623681  | 0.375653  |
| 25 | 6 | 0 | 0.801310  | 3.753683  | 0.025035  |
| 26 | 1 | 0 | 1.438354  | 3.781770  | -0.868681 |
| 27 | 1 | 0 | 1.468558  | 3.747263  | 0.891520  |
| 28 | 6 | 0 | 1.477809  | 0.542035  | 0.571495  |
| 29 | 6 | 0 | 2.494429  | 0.971739  | -0.280332 |
| 30 | 6 | 0 | 1.538087  | -0.745294 | 1.112451  |
| 31 | 6 | 0 | 3.560631  | 0.137964  | -0.591190 |
| 32 | 1 | 0 | 2.460412  | 1.960055  | -0.718781 |
| 33 | 6 | 0 | 2.592218  | -1.593998 | 0.812071  |
| 34 | 1 | 0 | 0.740476  | -1.093708 | 1.757398  |
| 35 | 6 | 0 | 3.588208  | -1.131285 | -0.036352 |
| 36 | 1 | 0 | 4.351288  | 0.462518  | -1.253641 |
| 37 | 1 | 0 | 2.644273  | -2.593682 | 1.221572  |
| 38 | 6 | 0 | 0.334503  | 1.482941  | 0.979833  |
| 39 | 1 | 0 | 0.617924  | 1.949245  | 1.927465  |
| 40 | 6 | 0 | -0.080952 | 4.995601  | 0.060122  |
| 41 | 1 | 0 | 0.524687  | 5.903560  | -0.001443 |
| 42 | 1 | 0 | -0.780563 | 4.998184  | -0.779837 |
| 43 | 1 | 0 | -0.658993 | 5.024597  | 0.986738  |
| 44 | 7 | 0 | 4.709887  | -2.025305 | -0.366961 |
| 45 | 8 | 0 | 5.581733  | -1.597883 | -1.095312 |
| 46 | 8 | 0 | 4.703290  | -3.143474 | 0.104954  |

### Structure 21d (<sup>13</sup>C<sub>2</sub> ax-ax) (M06-2X, DMSO)

Energy (Hartrees): = - 1220.665877  
 No imaginary frequencies

Standard orientation:

| Center Number | Atomic Number | Atomic Type | Coordinates (Angstroms) |           |           |
|---------------|---------------|-------------|-------------------------|-----------|-----------|
|               |               |             | X                       | Y         | Z         |
| 1             | 6             | 0           | -1.825415               | 1.214046  | -1.052698 |
| 2             | 6             | 0           | -0.543442               | 1.947494  | -1.461276 |
| 3             | 6             | 0           | -1.444476               | 0.181960  | 0.006545  |
| 4             | 1             | 0           | -0.775531               | 2.740331  | -2.173221 |
| 5             | 1             | 0           | 0.122098                | 1.231332  | -1.957537 |
| 6             | 1             | 0           | -2.263760               | 0.711116  | -1.913964 |
| 7             | 1             | 0           | -0.725504               | -0.526058 | -0.425693 |
| 8             | 8             | 0           | -0.830266               | 0.887280  | 1.097387  |
| 9             | 7             | 0           | 0.169151                | 2.533851  | -0.321179 |
| 10            | 6             | 0           | -2.591753               | -0.609262 | 0.636550  |
| 11            | 1             | 0           | -3.422011               | 0.072987  | 0.859619  |
| 12            | 6             | 0           | -3.101330               | -1.720202 | -0.268218 |
| 13            | 1             | 0           | -2.255478               | -2.368968 | -0.539147 |
| 14            | 6             | 0           | -4.151214               | -2.566228 | 0.431107  |
| 15            | 1             | 0           | -4.954960               | -1.915756 | 0.796770  |
| 16            | 1             | 0           | -3.708332               | -3.103681 | 1.272653  |
| 17            | 8             | 0           | -2.132212               | -1.243365 | 1.820982  |
| 18            | 1             | 0           | -1.631162               | -0.575804 | 2.304195  |
| 19            | 8             | 0           | -3.665193               | -1.135848 | -1.428354 |
| 20            | 1             | 0           | -4.209092               | -1.829282 | -1.821884 |
| 21            | 8             | 0           | -4.639973               | -3.465019 | -0.560660 |
| 22            | 1             | 0           | -5.445084               | -3.873433 | -0.229059 |
| 23            | 8             | 0           | -2.804839               | 2.115589  | -0.557695 |
| 24            | 1             | 0           | -2.522455               | 2.380904  | 0.325259  |
| 25            | 6             | 0           | -0.333585               | 3.825758  | 0.169936  |
| 26            | 1             | 0           | -1.063384               | 3.697415  | 0.982273  |
| 27            | 1             | 0           | -0.856367               | 4.318439  | -0.651339 |
| 28            | 6             | 0           | 1.494479                | 0.584872  | 0.410926  |
| 29            | 6             | 0           | 2.574690                | 0.989633  | -0.373450 |
| 30            | 6             | 0           | 1.489268                | -0.694503 | 0.970219  |
| 31            | 6             | 0           | 3.640821                | 0.131707  | -0.603957 |
| 32            | 1             | 0           | 2.573029                | 1.982381  | -0.806184 |
| 33            | 6             | 0           | 2.543079                | -1.567562 | 0.745455  |
| 34            | 1             | 0           | 0.646242                | -1.019250 | 1.568432  |
| 35            | 6             | 0           | 3.602029                | -1.133937 | -0.039131 |
| 36            | 1             | 0           | 4.484282                | 0.432881  | -1.210260 |
| 37            | 1             | 0           | 2.546601                | -2.563536 | 1.166657  |
| 38            | 6             | 0           | 0.374173                | 1.571433  | 0.728161  |
| 39            | 1             | 0           | 0.663193                | 2.108042  | 1.635228  |
| 40            | 6             | 0           | 0.809944                | 4.705318  | 0.655811  |
| 41            | 1             | 0           | 0.427234                | 5.653227  | 1.042387  |

|    |   |   |          |           |           |
|----|---|---|----------|-----------|-----------|
| 42 | 1 | 0 | 1.370108 | 4.218056  | 1.458644  |
| 43 | 1 | 0 | 1.501006 | 4.916948  | -0.163341 |
| 44 | 7 | 0 | 4.726851 | -2.051808 | -0.282165 |
| 45 | 8 | 0 | 5.672711 | -1.635418 | -0.918724 |
| 46 | 8 | 0 | 4.650235 | -3.176436 | 0.167942  |

### Structure 27a (<sup>2</sup>E ec-ax H-bond O) (M06-2X, Gas Phase)

Energy (Hartrees): = - 1016.1511189  
No imaginary frequencies

Standard orientation:

| Center Number | Atomic Number | Atomic Type | Coordinates (Angstroms) |           |           |
|---------------|---------------|-------------|-------------------------|-----------|-----------|
|               |               |             | X                       | Y         | Z         |
| 1             | 6             | 0           | 2.866366                | -0.398571 | -0.357824 |
| 2             | 6             | 0           | 2.707346                | -1.429450 | 0.566848  |
| 3             | 6             | 0           | 3.797922                | -1.900122 | 1.289743  |
| 4             | 6             | 0           | 5.060264                | -1.351985 | 1.089034  |
| 5             | 6             | 0           | 5.230278                | -0.336972 | 0.153576  |
| 6             | 6             | 0           | 4.138066                | 0.132230  | -0.566500 |
| 7             | 1             | 0           | 1.730503                | -1.879745 | 0.699779  |
| 8             | 1             | 0           | 3.663639                | -2.702358 | 2.005739  |
| 9             | 1             | 0           | 5.909947                | -1.721748 | 1.650460  |
| 10            | 1             | 0           | 6.213865                | 0.083770  | -0.019307 |
| 11            | 1             | 0           | 4.275461                | 0.916254  | -1.305293 |
| 12            | 6             | 0           | 1.676796                | 0.186218  | -1.103864 |
| 13            | 1             | 0           | 2.005401                | 0.525636  | -2.092184 |
| 14            | 7             | 0           | 0.997503                | 1.289318  | -0.424302 |
| 15            | 8             | 0           | 0.662125                | -0.787225 | -1.261013 |
| 16            | 6             | 0           | -0.430157               | -0.512421 | -0.361794 |
| 17            | 6             | 0           | 0.076746                | 0.642379  | 0.499214  |
| 18            | 1             | 0           | -0.723204               | 1.318916  | 0.794473  |
| 19            | 1             | 0           | 0.569182                | 0.274975  | 1.413167  |
| 20            | 1             | 0           | -0.626188               | -1.419247 | 0.213906  |
| 21            | 6             | 0           | -1.650680               | -0.145856 | -1.214676 |
| 22            | 1             | 0           | -1.590814               | 0.922806  | -1.470268 |
| 23            | 6             | 0           | -3.008275               | -0.428982 | -0.575039 |
| 24            | 1             | 0           | -3.055846               | -1.501331 | -0.337300 |
| 25            | 6             | 0           | -3.284793               | 0.360019  | 0.701897  |
| 26            | 1             | 0           | -3.082755               | 1.420627  | 0.520235  |
| 27            | 6             | 0           | -4.728991               | 0.204707  | 1.148033  |
| 28            | 1             | 0           | -4.913729               | 0.878472  | 1.992215  |
| 29            | 1             | 0           | -5.399009               | 0.440435  | 0.319093  |
| 30            | 8             | 0           | -1.665383               | -0.921822 | -2.402009 |
| 31            | 1             | 0           | -0.746545               | -1.015224 | -2.678024 |
| 32            | 8             | 0           | -4.015124               | -0.085311 | -1.507734 |
| 33            | 1             | 0           | -3.731361               | -0.454712 | -2.351364 |
| 34            | 8             | 0           | -2.423417               | -0.070881 | 1.743081  |
| 35            | 1             | 0           | -2.837668               | -0.862724 | 2.107471  |
| 36            | 8             | 0           | -4.853011               | -1.153813 | 1.557434  |
| 37            | 1             | 0           | -5.753314               | -1.316691 | 1.841802  |
| 38            | 6             | 0           | 1.849399                | 2.321119  | 0.144746  |
| 39            | 1             | 0           | 2.454589                | 1.933536  | 0.980228  |
| 40            | 1             | 0           | 2.548410                | 2.638863  | -0.635473 |
| 41            | 6             | 0           | 1.030677                | 3.520087  | 0.605958  |
| 42            | 1             | 0           | 1.689694                | 4.333364  | 0.914389  |
| 43            | 1             | 0           | 0.392260                | 3.873309  | -0.205947 |
| 44            | 1             | 0           | 0.397654                | 3.265586  | 1.458132  |

### Structure 27a (<sup>2</sup>E ec-ax H-bond N) (M06-2X, Gas Phase)

Energy (Hartrees): = - 1016.1542038  
No imaginary frequencies

Standard orientation:

| Center Number | Atomic Number | Atomic Type | Coordinates (Angstroms) |           |           |
|---------------|---------------|-------------|-------------------------|-----------|-----------|
|               |               |             | X                       | Y         | Z         |
| 1             | 6             | 0           | 2.254952                | -0.741039 | -0.393912 |
| 2             | 6             | 0           | 2.265519                | -1.520305 | 0.761796  |
| 3             | 6             | 0           | 3.386051                | -2.276363 | 1.088745  |
| 4             | 6             | 0           | 4.501331                | -2.270303 | 0.258121  |
| 5             | 6             | 0           | 4.488675                | -1.513602 | -0.908815 |
| 6             | 6             | 0           | 3.368385                | -0.756926 | -1.232260 |
| 7             | 1             | 0           | 1.381326                | -1.555741 | 1.387974  |
| 8             | 1             | 0           | 3.383548                | -2.881125 | 1.987951  |
| 9             | 1             | 0           | 5.371542                | -2.863848 | 0.512021  |
| 10            | 1             | 0           | 5.347036                | -1.519782 | -1.570018 |
| 11            | 1             | 0           | 3.355853                | -0.178291 | -2.151192 |
| 12            | 6             | 0           | 1.064742                | 0.140583  | -0.735690 |
| 13            | 1             | 0           | 0.956520                | 0.197571  | -1.824194 |

|    |   |   |           |           |           |
|----|---|---|-----------|-----------|-----------|
| 14 | 7 | 0 | 1.133591  | 1.511192  | -0.200523 |
| 15 | 8 | 0 | -0.120979 | -0.374843 | -0.175174 |
| 16 | 6 | 0 | -0.529809 | 0.428209  | 0.947415  |
| 17 | 6 | 0 | 0.648603  | 1.375134  | 1.172430  |
| 18 | 1 | 0 | 0.321770  | 2.338973  | 1.563165  |
| 19 | 1 | 0 | 1.405595  | 0.941867  | 1.842264  |
| 20 | 1 | 0 | -0.712550 | -0.242770 | 1.784775  |
| 21 | 6 | 0 | -1.821350 | 1.181920  | 0.615944  |
| 22 | 1 | 0 | -2.279649 | 1.509370  | 1.558012  |
| 23 | 6 | 0 | -2.851804 | 0.357890  | -0.161829 |
| 24 | 1 | 0 | -2.375555 | -0.008181 | -1.079729 |
| 25 | 6 | 0 | -3.424281 | -0.832642 | 0.604694  |
| 26 | 1 | 0 | -3.934881 | -0.456328 | 1.496250  |
| 27 | 6 | 0 | -4.422217 | -1.589686 | -0.256404 |
| 28 | 1 | 0 | -4.882053 | -2.378117 | 0.349748  |
| 29 | 1 | 0 | -5.186630 | -0.899138 | -0.623354 |
| 30 | 8 | 0 | -1.577008 | 2.364397  | -0.142582 |
| 31 | 1 | 0 | -0.719347 | 2.261361  | -0.585801 |
| 32 | 8 | 0 | -3.948869 | 1.198378  | -0.472065 |
| 33 | 1 | 0 | -3.558941 | 2.024916  | -0.778868 |
| 34 | 8 | 0 | -2.409119 | -1.712301 | 1.047325  |
| 35 | 1 | 0 | -1.994926 | -2.070373 | 0.252319  |
| 36 | 8 | 0 | -3.667155 | -2.152077 | -1.323016 |
| 37 | 1 | 0 | -4.255086 | -2.656625 | -1.886514 |
| 38 | 6 | 0 | 2.400754  | 2.212183  | -0.363823 |
| 39 | 1 | 0 | 3.200157  | 1.731166  | 0.219792  |
| 40 | 1 | 0 | 2.683266  | 2.136464  | -1.418301 |
| 41 | 6 | 0 | 2.272585  | 3.679204  | 0.024637  |
| 42 | 1 | 0 | 3.186501  | 4.218224  | -0.229590 |
| 43 | 1 | 0 | 1.435665  | 4.141637  | -0.502610 |
| 44 | 1 | 0 | 2.107933  | 3.796450  | 1.097372  |

### Structure 27a (<sup>2</sup>E ax-ax) (M06-2X, Gas Phase)

Energy (Hartrees): = - 1016.1537698  
No imaginary frequencies

Standard orientation:

| Center<br>Number | Atomic<br>Number | Atomic<br>Type | Coordinates (Angstroms) |           |           |
|------------------|------------------|----------------|-------------------------|-----------|-----------|
|                  |                  |                | X                       | Y         | Z         |
| 1                | 6                | 0              | -2.764826               | -0.282531 | 0.258796  |
| 2                | 6                | 0              | -2.817589               | -1.336539 | 1.167113  |
| 3                | 6                | 0              | -3.722669               | -2.376566 | 0.978543  |
| 4                | 6                | 0              | -4.580549               | -2.367326 | -0.115344 |
| 5                | 6                | 0              | -4.527453               | -1.315935 | -1.025227 |
| 6                | 6                | 0              | -3.622445               | -0.278195 | -0.840004 |
| 7                | 1                | 0              | -2.143619               | -1.336139 | 2.015489  |
| 8                | 1                | 0              | -3.756489               | -3.195878 | 1.687064  |
| 9                | 1                | 0              | -5.285138               | -3.177519 | -0.260925 |
| 10               | 1                | 0              | -5.188261               | -1.307955 | -1.884113 |
| 11               | 1                | 0              | -3.556350               | 0.536131  | -1.552003 |
| 12               | 6                | 0              | -1.818527               | 0.886661  | 0.476363  |
| 13               | 1                | 0              | -2.342503               | 1.700252  | 0.983533  |
| 14               | 7                | 0              | -1.233247               | 1.343035  | -0.763942 |
| 15               | 8                | 0              | -0.723015               | 0.513811  | 1.318068  |
| 16               | 6                | 0              | 0.314830                | -0.005330 | 0.470630  |
| 17               | 6                | 0              | -0.150740               | 0.369416  | -0.959810 |
| 18               | 1                | 0              | 0.643646                | 0.789753  | -1.573396 |
| 19               | 1                | 0              | -0.537995               | -0.511733 | -1.470956 |
| 20               | 1                | 0              | 0.372440                | -1.088599 | 0.605988  |
| 21               | 6                | 0              | 1.618843                | 0.658793  | 0.919641  |
| 22               | 1                | 0              | 1.692176                | 1.658325  | 0.462673  |
| 23               | 6                | 0              | 2.898716                | -0.107397 | 0.595994  |
| 24               | 1                | 0              | 2.829573                | -1.099576 | 1.063904  |
| 25               | 6                | 0              | 3.163224                | -0.292668 | -0.895883 |
| 26               | 1                | 0              | 3.095025                | 0.679560  | -1.395434 |
| 27               | 6                | 0              | 4.544094                | -0.876259 | -1.143934 |
| 28               | 1                | 0              | 4.735995                | -0.883115 | -2.222709 |
| 29               | 1                | 0              | 5.297815                | -0.278932 | -0.626993 |
| 30               | 8                | 0              | 1.642912                | 0.783774  | 2.333086  |
| 31               | 1                | 0              | 0.752717                | 1.036869  | 2.601903  |
| 32               | 8                | 0              | 3.992786                | 0.615729  | 1.126575  |
| 33               | 1                | 0              | 3.733167                | 0.874245  | 2.017795  |
| 34               | 8                | 0              | 2.184370                | -1.140263 | -1.471092 |
| 35               | 1                | 0              | 2.470438                | -2.039510 | -1.268653 |
| 36               | 8                | 0              | 4.486658                | -2.206265 | -0.638383 |
| 37               | 1                | 0              | 5.336846                | -2.629481 | -0.766127 |
| 38               | 6                | 0              | -0.783848               | 2.739761  | -0.678471 |
| 39               | 1                | 0              | -0.308003               | 2.954827  | 0.290446  |
| 40               | 1                | 0              | -0.024978               | 2.888354  | -1.449718 |
| 41               | 6                | 0              | -1.941873               | 3.697130  | -0.923935 |
| 42               | 1                | 0              | -1.601715               | 4.733834  | -0.881641 |
| 43               | 1                | 0              | -2.378722               | 3.508592  | -1.905981 |
| 44               | 1                | 0              | -2.728135               | 3.574061  | -0.175408 |

-----  
**Structure 27a (E2 ec-ec) (M06-2X, Gas Phase)**

Energy (Hartrees): = - 1016.1516741  
 No imaginary frequencies

Standard orientation:

| Center<br>Number | Atomic<br>Number | Atomic<br>Type | Coordinates (Angstroms) |           |           |
|------------------|------------------|----------------|-------------------------|-----------|-----------|
|                  |                  |                | X                       | Y         | Z         |
| 1                | 6                | 0              | 3.001890                | -0.371023 | -0.105425 |
| 2                | 6                | 0              | 3.429587                | -0.199140 | 1.210164  |
| 3                | 6                | 0              | 4.752775                | -0.442079 | 1.547104  |
| 4                | 6                | 0              | 5.657534                | -0.856225 | 0.570587  |
| 5                | 6                | 0              | 5.234532                | -1.026438 | -0.740793 |
| 6                | 6                | 0              | 3.904092                | -0.785031 | -1.077048 |
| 7                | 1                | 0              | 2.711102                | 0.133729  | 1.949870  |
| 8                | 1                | 0              | 5.084859                | -0.309547 | 2.569958  |
| 9                | 1                | 0              | 6.691516                | -1.044846 | 0.834641  |
| 10               | 1                | 0              | 5.935403                | -1.348790 | -1.501566 |
| 11               | 1                | 0              | 3.566445                | -0.918315 | -2.099826 |
| 12               | 6                | 0              | 1.561134                | -0.094472 | -0.444260 |
| 13               | 1                | 0              | 1.394098                | -0.256366 | -1.529281 |
| 14               | 7                | 0              | 1.129698                | 1.230510  | -0.041050 |
| 15               | 8                | 0              | 0.715675                | -0.954410 | 0.296418  |
| 16               | 6                | 0              | -0.563834               | -0.311715 | 0.450853  |
| 17               | 6                | 0              | -0.325926               | 1.133991  | -0.011821 |
| 18               | 1                | 0              | -0.762639               | 1.295407  | -1.014702 |
| 19               | 1                | 0              | -0.764057               | 1.860201  | 0.665189  |
| 20               | 1                | 0              | -0.824858               | -0.369268 | 1.509926  |
| 21               | 6                | 0              | -1.563387               | -1.125519 | -0.377612 |
| 22               | 1                | 0              | -1.416762               | -0.892443 | -1.444167 |
| 23               | 6                | 0              | -3.047546               | -0.966820 | -0.050642 |
| 24               | 1                | 0              | -3.191895               | -1.211154 | 1.011173  |
| 25               | 6                | 0              | -3.619293               | 0.425382  | -0.306727 |
| 26               | 1                | 0              | -3.330055               | 0.759501  | -1.308098 |
| 27               | 6                | 0              | -5.135938               | 0.426383  | -0.203177 |
| 28               | 1                | 0              | -5.507854               | 1.414510  | -0.496553 |
| 29               | 1                | 0              | -5.554358               | -0.345773 | -0.851252 |
| 30               | 8                | 0              | -1.322412               | -2.507831 | -0.158451 |
| 31               | 1                | 0              | -0.365142               | -2.620202 | -0.142407 |
| 32               | 8                | 0              | -3.769316               | -1.868799 | -0.867514 |
| 33               | 1                | 0              | -3.295487               | -2.706554 | -0.821235 |
| 34               | 8                | 0              | -3.088888               | 1.352476  | 0.623692  |
| 35               | 1                | 0              | -3.604708               | 1.230250  | 1.430234  |
| 36               | 8                | 0              | -5.418299               | 0.173852  | 1.169573  |
| 37               | 1                | 0              | -6.367501               | 0.154619  | 1.298694  |
| 38               | 6                | 0              | 1.648520                | 2.290849  | -0.889818 |
| 39               | 1                | 0              | 2.737385                | 2.191656  | -0.912604 |
| 40               | 1                | 0              | 1.284225                | 2.170969  | -1.927167 |
| 41               | 6                | 0              | 1.268092                | 3.667218  | -0.363618 |
| 42               | 1                | 0              | 1.741850                | 4.448062  | -0.960746 |
| 43               | 1                | 0              | 0.188232                | 3.824601  | -0.401550 |
| 44               | 1                | 0              | 1.594836                | 3.771713  | 0.672483  |

-----  
**Structure 27a (<sup>2</sup>E ec-ax H-bond O) (M06-2X, Benzene)**

Energy (Hartrees): = - 1016.1713248  
 No imaginary frequencies

Standard orientation:

| Center<br>Number | Atomic<br>Number | Atomic<br>Type | Coordinates (Angstroms) |           |           |
|------------------|------------------|----------------|-------------------------|-----------|-----------|
|                  |                  |                | X                       | Y         | Z         |
| 1                | 6                | 0              | -2.870117               | -0.401115 | 0.358861  |
| 2                | 6                | 0              | -2.713141               | -1.426746 | -0.572986 |
| 3                | 6                | 0              | -3.806895               | -1.896847 | -1.292218 |
| 4                | 6                | 0              | -5.070170               | -1.354370 | -1.079738 |
| 5                | 6                | 0              | -5.237976               | -0.345343 | -0.136767 |
| 6                | 6                | 0              | -4.142734               | 0.123987  | 0.579458  |
| 7                | 1                | 0              | -1.735746               | -1.872553 | -0.718877 |
| 8                | 1                | 0              | -3.674426               | -2.694011 | -2.014595 |
| 9                | 1                | 0              | -5.922174               | -1.723563 | -1.638601 |
| 10               | 1                | 0              | -6.222170               | 0.071047  | 0.044844  |
| 11               | 1                | 0              | -4.277293               | 0.904114  | 1.322944  |
| 12               | 6                | 0              | -1.678354               | 0.188341  | 1.098641  |
| 13               | 1                | 0              | -2.004584               | 0.530358  | 2.086482  |
| 14               | 7                | 0              | -1.001189               | 1.289700  | 0.413564  |
| 15               | 8                | 0              | -0.661247               | -0.784441 | 1.255652  |
| 16               | 6                | 0              | 0.431798                | -0.509233 | 0.356228  |
| 17               | 6                | 0              | -0.077073               | 0.642690  | -0.507364 |
| 18               | 1                | 0              | 0.720782                | 1.322916  | -0.800711 |
| 19               | 1                | 0              | -0.567181               | 0.272436  | -1.421029 |



|    |   |   |           |           |           |
|----|---|---|-----------|-----------|-----------|
| 20 | 1 | 0 | 0.629811  | -1.417381 | -0.216450 |
| 21 | 6 | 0 | 1.650682  | -0.137022 | 1.210372  |
| 22 | 1 | 0 | 1.590746  | 0.932665  | 1.460808  |
| 23 | 6 | 0 | 3.011134  | -0.423154 | 0.577478  |
| 24 | 1 | 0 | 3.060441  | -1.497085 | 0.348192  |
| 25 | 6 | 0 | 3.293940  | 0.356292  | -0.704696 |
| 26 | 1 | 0 | 3.089444  | 1.418171  | -0.535027 |
| 27 | 6 | 0 | 4.738489  | 0.199039  | -1.146872 |
| 28 | 1 | 0 | 4.919690  | 0.855790  | -2.005160 |
| 29 | 1 | 0 | 5.412485  | 0.460674  | -0.328617 |
| 30 | 8 | 0 | 1.660165  | -0.906232 | 2.404424  |
| 31 | 1 | 0 | 0.739635  | -0.991104 | 2.678971  |
| 32 | 8 | 0 | 4.014182  | -0.073812 | 1.514937  |
| 33 | 1 | 0 | 3.727295  | -0.442143 | 2.358170  |
| 34 | 8 | 0 | 2.436937  | -0.086905 | -1.746198 |
| 35 | 1 | 0 | 2.850034  | -0.887875 | -2.092707 |
| 36 | 8 | 0 | 4.875758  | -1.167538 | -1.524849 |
| 37 | 1 | 0 | 5.765329  | -1.311642 | -1.854762 |
| 38 | 6 | 0 | -1.854801 | 2.320809  | -0.156899 |
| 39 | 1 | 0 | -2.457528 | 1.932582  | -0.993493 |
| 40 | 1 | 0 | -2.554394 | 2.638300  | 0.622796  |
| 41 | 6 | 0 | -1.038516 | 3.519770  | -0.619965 |
| 42 | 1 | 0 | -1.700231 | 4.334753  | -0.920015 |
| 43 | 1 | 0 | -0.394029 | 3.873607  | 0.187819  |
| 44 | 1 | 0 | -0.411565 | 3.270883  | -1.478865 |

### Structure 27a (<sup>2</sup>E ec-ax H-bond N) (M06-2X, Benzene)

Energy (Hartrees): = - 1016.1748878  
 No imaginary frequencies

Standard orientation:

| Center<br>Number | Atomic<br>Number | Atomic<br>Type | Coordinates (Angstroms) |           |           |
|------------------|------------------|----------------|-------------------------|-----------|-----------|
|                  |                  |                | X                       | Y         | Z         |
| 1                | 6                | 0              | 2.257195                | -0.740945 | -0.386890 |
| 2                | 6                | 0              | 2.288809                | -1.513560 | 0.773541  |
| 3                | 6                | 0              | 3.416787                | -2.265036 | 1.087138  |
| 4                | 6                | 0              | 4.518650                | -2.261005 | 0.238303  |
| 5                | 6                | 0              | 4.485400                | -1.510213 | -0.932568 |
| 6                | 6                | 0              | 3.357878                | -0.757959 | -1.242900 |
| 7                | 1                | 0              | 1.417539                | -1.545095 | 1.418038  |
| 8                | 1                | 0              | 3.430092                | -2.863768 | 1.990590  |
| 9                | 1                | 0              | 5.394524                | -2.851156 | 0.481636  |
| 10               | 1                | 0              | 5.333244                | -1.517816 | -1.607601 |
| 11               | 1                | 0              | 3.329459                | -0.183914 | -2.164380 |
| 12               | 6                | 0              | 1.058477                | 0.134686  | -0.716498 |
| 13               | 1                | 0              | 0.936479                | 0.188008  | -1.803469 |
| 14               | 7                | 0              | 1.124399                | 1.507302  | -0.185860 |
| 15               | 8                | 0              | -0.118073               | -0.388658 | -0.138028 |
| 16               | 6                | 0              | -0.536228               | 0.432160  | 0.968213  |
| 17               | 6                | 0              | 0.642394                | 1.378242  | 1.189110  |
| 18               | 1                | 0              | 0.320190                | 2.344347  | 1.578276  |
| 19               | 1                | 0              | 1.398287                | 0.946688  | 1.860455  |
| 20               | 1                | 0              | -0.725489               | -0.224199 | 1.815106  |
| 21               | 6                | 0              | -1.824612               | 1.183197  | 0.614832  |
| 22               | 1                | 0              | -2.291288               | 1.520577  | 1.549217  |
| 23               | 6                | 0              | -2.847658               | 0.353676  | -0.168702 |
| 24               | 1                | 0              | -2.357905               | -0.024562 | -1.074523 |
| 25               | 6                | 0              | -3.443196               | -0.824992 | 0.598814  |
| 26               | 1                | 0              | -3.974568               | -0.437738 | 1.473403  |
| 27               | 6                | 0              | -4.420289               | -1.595100 | -0.273898 |
| 28               | 1                | 0              | -4.889310               | -2.378527 | 0.331462  |
| 29               | 1                | 0              | -5.186356               | -0.917636 | -0.662312 |
| 30               | 8                | 0              | -1.570298               | 2.356119  | -0.158069 |
| 31               | 1                | 0              | -0.693711               | 2.254694  | -0.566804 |
| 32               | 8                | 0              | -3.933628               | 1.199080  | -0.511775 |
| 33               | 1                | 0              | -3.527719               | 2.015648  | -0.825589 |
| 34               | 8                | 0              | -2.439124               | -1.701222 | 1.076945  |
| 35               | 1                | 0              | -1.996713               | -2.055446 | 0.295380  |
| 36               | 8                | 0              | -3.647411               | -2.165507 | -1.324005 |
| 37               | 1                | 0              | -4.205666               | -2.763660 | -1.824938 |
| 38               | 6                | 0              | 2.387665                | 2.214803  | -0.359725 |
| 39               | 1                | 0              | 3.188085                | 1.749449  | 0.234733  |
| 40               | 1                | 0              | 2.671771                | 2.124060  | -1.412315 |
| 41               | 6                | 0              | 2.251887                | 3.686021  | 0.005447  |
| 42               | 1                | 0              | 3.168643                | 4.222129  | -0.247592 |
| 43               | 1                | 0              | 1.422040                | 4.143477  | -0.538401 |
| 44               | 1                | 0              | 2.076891                | 3.820978  | 1.074805  |

### Structure 27a (<sup>2</sup>E ax-ax) (M06-2X, Benzene)

Energy (Hartrees): = - 1016.1739095  
 No imaginary frequencies

Standard orientation:

| Center<br>Number | Atomic<br>Number | Atomic<br>Type | Coordinates (Angstroms) |           |           |
|------------------|------------------|----------------|-------------------------|-----------|-----------|
|                  |                  |                | X                       | Y         | Z         |
| 1                | 6                | 0              | -2.772786               | -0.285452 | 0.257807  |
| 2                | 6                | 0              | -2.817504               | -1.355602 | 1.148242  |
| 3                | 6                | 0              | -3.731654               | -2.387925 | 0.956885  |
| 4                | 6                | 0              | -4.606057               | -2.356646 | -0.123712 |
| 5                | 6                | 0              | -4.561094               | -1.289842 | -1.016585 |
| 6                | 6                | 0              | -3.646699               | -0.260338 | -0.828542 |
| 7                | 1                | 0              | -2.132408               | -1.375440 | 1.987600  |
| 8                | 1                | 0              | -3.758941               | -3.218607 | 1.652798  |
| 9                | 1                | 0              | -5.318140               | -3.160151 | -0.271859 |
| 10               | 1                | 0              | -5.235387               | -1.263301 | -1.864882 |
| 11               | 1                | 0              | -3.590407               | 0.565327  | -1.528676 |
| 12               | 6                | 0              | -1.817190               | 0.876836  | 0.479634  |
| 13               | 1                | 0              | -2.335772               | 1.688613  | 0.994798  |
| 14               | 7                | 0              | -1.233357               | 1.340958  | -0.758592 |
| 15               | 8                | 0              | -0.721178               | 0.490506  | 1.314864  |
| 16               | 6                | 0              | 0.319777                | -0.014880 | 0.462163  |
| 17               | 6                | 0              | -0.147068               | 0.372862  | -0.963752 |
| 18               | 1                | 0              | 0.645832                | 0.805218  | -1.571063 |
| 19               | 1                | 0              | -0.530001               | -0.504928 | -1.484369 |
| 20               | 1                | 0              | 0.382794                | -1.098993 | 0.587609  |
| 21               | 6                | 0              | 1.620827                | 0.651309  | 0.918327  |
| 22               | 1                | 0              | 1.690491                | 1.654504  | 0.470411  |
| 23               | 6                | 0              | 2.905125                | -0.107726 | 0.593854  |
| 24               | 1                | 0              | 2.838124                | -1.102218 | 1.057002  |
| 25               | 6                | 0              | 3.177496                | -0.285083 | -0.898324 |
| 26               | 1                | 0              | 3.106020                | 0.687485  | -1.396563 |
| 27               | 6                | 0              | 4.559626                | -0.863722 | -1.147637 |
| 28               | 1                | 0              | 4.744519                | -0.881243 | -2.227554 |
| 29               | 1                | 0              | 5.319215                | -0.257399 | -0.649459 |
| 30               | 8                | 0              | 1.639205                | 0.765647  | 2.334854  |
| 31               | 1                | 0              | 0.749522                | 1.026519  | 2.599203  |
| 32               | 8                | 0              | 3.994138                | 0.617362  | 1.136644  |
| 33               | 1                | 0              | 3.727386                | 0.866961  | 2.028521  |
| 34               | 8                | 0              | 2.203211                | -1.136758 | -1.478784 |
| 35               | 1                | 0              | 2.487406                | -2.034355 | -1.264769 |
| 36               | 8                | 0              | 4.519409                | -2.188321 | -0.625430 |
| 37               | 1                | 0              | 5.348825                | -2.626786 | -0.827138 |
| 38               | 6                | 0              | -0.788039               | 2.740117  | -0.667901 |
| 39               | 1                | 0              | -0.310358               | 2.951366  | 0.300531  |
| 40               | 1                | 0              | -0.032698               | 2.894385  | -1.441295 |
| 41               | 6                | 0              | -1.947310               | 3.696743  | -0.903839 |
| 42               | 1                | 0              | -1.605585               | 4.733319  | -0.855678 |
| 43               | 1                | 0              | -2.386953               | 3.519566  | -1.887549 |
| 44               | 1                | 0              | -2.732959               | 3.572049  | -0.154366 |

**Structure 27a (E2 ec-ec) (M06-2X, Benzene)**

Energy (Hartrees): = - 1016.1721308  
No imaginary frequencies

Standard orientation:

| Center<br>Number | Atomic<br>Number | Atomic<br>Type | Coordinates (Angstroms) |           |           |
|------------------|------------------|----------------|-------------------------|-----------|-----------|
|                  |                  |                | X                       | Y         | Z         |
| 1                | 6                | 0              | 3.003690                | -0.372551 | -0.100047 |
| 2                | 6                | 0              | 3.424816                | -0.184286 | 1.216140  |
| 3                | 6                | 0              | 4.745146                | -0.427328 | 1.565536  |
| 4                | 6                | 0              | 5.654758                | -0.858150 | 0.600416  |
| 5                | 6                | 0              | 5.238891                | -1.044434 | -0.711478 |
| 6                | 6                | 0              | 3.911419                | -0.802499 | -1.060543 |
| 7                | 1                | 0              | 2.705318                | 0.161739  | 1.949342  |
| 8                | 1                | 0              | 5.070204                | -0.281557 | 2.589212  |
| 9                | 1                | 0              | 6.686574                | -1.047137 | 0.873717  |
| 10               | 1                | 0              | 5.943610                | -1.379984 | -1.463420 |
| 11               | 1                | 0              | 3.581505                | -0.947958 | -2.084417 |
| 12               | 6                | 0              | 1.564710                | -0.095836 | -0.451582 |
| 13               | 1                | 0              | 1.404068                | -0.264868 | -1.535196 |
| 14               | 7                | 0              | 1.132566                | 1.232455  | -0.056987 |
| 15               | 8                | 0              | 0.715067                | -0.952139 | 0.291354  |
| 16               | 6                | 0              | -0.565265               | -0.307982 | 0.439833  |
| 17               | 6                | 0              | -0.324159               | 1.137265  | -0.022141 |
| 18               | 1                | 0              | -0.763107               | 1.299887  | -1.023016 |
| 19               | 1                | 0              | -0.756035               | 1.863767  | 0.658891  |
| 20               | 1                | 0              | -0.831103               | -0.365872 | 1.497491  |
| 21               | 6                | 0              | -1.564086               | -1.114552 | -0.397968 |
| 22               | 1                | 0              | -1.420263               | -0.866560 | -1.461062 |
| 23               | 6                | 0              | -3.048156               | -0.963886 | -0.065838 |
| 24               | 1                | 0              | -3.190773               | -1.241478 | 0.987910  |
| 25               | 6                | 0              | -3.619273               | 0.437054  | -0.276002 |

|    |   |   |           |           |           |
|----|---|---|-----------|-----------|-----------|
| 26 | 1 | 0 | -3.330846 | 0.806568  | -1.264969 |
| 27 | 6 | 0 | -5.134783 | 0.443447  | -0.170683 |
| 28 | 1 | 0 | -5.498359 | 1.448637  | -0.411563 |
| 29 | 1 | 0 | -5.565753 | -0.284171 | -0.861315 |
| 30 | 8 | 0 | -1.318571 | -2.501053 | -0.199645 |
| 31 | 1 | 0 | -0.360468 | -2.609712 | -0.192319 |
| 32 | 8 | 0 | -3.770788 | -1.843994 | -0.908442 |
| 33 | 1 | 0 | -3.300906 | -2.684891 | -0.878142 |
| 34 | 8 | 0 | -3.083715 | 1.328758  | 0.687537  |
| 35 | 1 | 0 | -3.589217 | 1.167534  | 1.494310  |
| 36 | 8 | 0 | -5.424646 | 0.118365  | 1.185094  |
| 37 | 1 | 0 | -6.372030 | 0.180965  | 1.324752  |
| 38 | 6 | 0 | 1.646780  | 2.287855  | -0.917174 |
| 39 | 1 | 0 | 2.736126  | 2.194143  | -0.941346 |
| 40 | 1 | 0 | 1.280390  | 2.157851  | -1.951868 |
| 41 | 6 | 0 | 1.264086  | 3.667456  | -0.404004 |
| 42 | 1 | 0 | 1.736214  | 4.442816  | -1.010531 |
| 43 | 1 | 0 | 0.183994  | 3.826071  | -0.441966 |
| 44 | 1 | 0 | 1.592680  | 3.788076  | 0.630436  |

### Structure 27a (<sup>2</sup>E ec-ax H-bond O) (M06-2X, DMSO)

Energy (Hartrees): = - 1016.1747009  
No imaginary frequencies

Standard orientation:

| Center Number | Atomic Number | Atomic Type | Coordinates (Angstroms) |           |           |
|---------------|---------------|-------------|-------------------------|-----------|-----------|
|               |               |             | X                       | Y         | Z         |
| 1             | 6             | 0           | -2.852258               | -0.390872 | 0.363943  |
| 2             | 6             | 0           | -2.651322               | -1.434151 | -0.540931 |
| 3             | 6             | 0           | -3.722105               | -1.956396 | -1.260995 |
| 4             | 6             | 0           | -5.004610               | -1.446373 | -1.079030 |
| 5             | 6             | 0           | -5.214410               | -0.415835 | -0.166860 |
| 6             | 6             | 0           | -4.142784               | 0.104876  | 0.551510  |
| 7             | 1             | 0           | -1.659437               | -1.852826 | -0.671350 |
| 8             | 1             | 0           | -3.555871               | -2.767203 | -1.961276 |
| 9             | 1             | 0           | -5.837755               | -1.857049 | -1.637918 |
| 10            | 1             | 0           | -6.212435               | -0.021954 | -0.011068 |
| 11            | 1             | 0           | -4.308231               | 0.902110  | 1.270167  |
| 12            | 6             | 0           | -1.693190               | 0.246125  | 1.116648  |
| 13            | 1             | 0           | -2.056122               | 0.613023  | 2.081257  |
| 14            | 7             | 0           | -1.015195               | 1.336258  | 0.412840  |
| 15            | 8             | 0           | -0.661781               | -0.699462 | 1.338269  |
| 16            | 6             | 0           | 0.421390                | -0.473313 | 0.410507  |
| 17            | 6             | 0           | -0.073487               | 0.667508  | -0.477848 |
| 18            | 1             | 0           | 0.729516                | 1.342970  | -0.769056 |
| 19            | 1             | 0           | -0.552932               | 0.283245  | -1.390791 |
| 20            | 1             | 0           | 0.590119                | -1.399376 | -0.142571 |
| 21            | 6             | 0           | 1.659856                | -0.109094 | 1.236008  |
| 22            | 1             | 0           | 1.622682                | 0.964255  | 1.474671  |
| 23            | 6             | 0           | 3.003403                | -0.420201 | 0.580345  |
| 24            | 1             | 0           | 3.033946                | -1.498314 | 0.368214  |
| 25            | 6             | 0           | 3.263670                | 0.334981  | -0.721449 |
| 26            | 1             | 0           | 3.051102                | 1.398134  | -0.572308 |
| 27            | 6             | 0           | 4.700155                | 0.185504  | -1.189225 |
| 28            | 1             | 0           | 4.846579                | 0.816276  | -2.072255 |
| 29            | 1             | 0           | 5.392485                | 0.492180  | -0.402218 |
| 30            | 8             | 0           | 1.679393                | -0.865937 | 2.440303  |
| 31            | 1             | 0           | 0.767140                | -0.894725 | 2.753179  |
| 32            | 8             | 0           | 4.029650                | -0.070150 | 1.495450  |
| 33            | 1             | 0           | 3.747702                | -0.415268 | 2.350503  |
| 34            | 8             | 0           | 2.393662                | -0.141279 | -1.739014 |
| 35            | 1             | 0           | 2.805144                | -0.954210 | -2.060572 |
| 36            | 8             | 0           | 4.863738                | -1.190674 | -1.523330 |
| 37            | 1             | 0           | 5.689630                | -1.290055 | -2.005517 |
| 38            | 6             | 0           | -1.881525               | 2.321244  | -0.221902 |
| 39            | 1             | 0           | -2.431360               | 1.881576  | -1.069452 |
| 40            | 1             | 0           | -2.623853               | 2.635234  | 0.518083  |
| 41            | 6             | 0           | -1.092310               | 3.532558  | -0.697055 |
| 42            | 1             | 0           | -1.773204               | 4.295407  | -1.080653 |
| 43            | 1             | 0           | -0.517681               | 3.963059  | 0.126575  |
| 44            | 1             | 0           | -0.400926               | 3.270371  | -1.500952 |

### Structure 27a (<sup>2</sup>E ec-ax H-bond N) (M06-2X, DMSO)

Energy (Hartrees): = - 1016.177963  
No imaginary frequencies

Standard orientation:

| Center Number | Atomic Number | Atomic Type | Coordinates (Angstroms) |   |   |
|---------------|---------------|-------------|-------------------------|---|---|
|               |               |             | X                       | Y | Z |

|    |   |   |           |           |           |
|----|---|---|-----------|-----------|-----------|
| 1  | 6 | 0 | 2.364175  | -0.741496 | -0.444539 |
| 2  | 6 | 0 | 2.329796  | -1.585123 | 0.666300  |
| 3  | 6 | 0 | 3.424598  | -2.388051 | 0.973008  |
| 4  | 6 | 0 | 4.559592  | -2.362178 | 0.167209  |
| 5  | 6 | 0 | 4.593823  | -1.534468 | -0.951648 |
| 6  | 6 | 0 | 3.499466  | -0.730359 | -1.255205 |
| 7  | 1 | 0 | 1.438596  | -1.626976 | 1.282856  |
| 8  | 1 | 0 | 3.389090  | -3.040090 | 1.838493  |
| 9  | 1 | 0 | 5.409990  | -2.990897 | 0.405411  |
| 10 | 1 | 0 | 5.469425  | -1.520390 | -1.590807 |
| 11 | 1 | 0 | 3.522138  | -0.092243 | -2.133818 |
| 12 | 6 | 0 | 1.205062  | 0.185971  | -0.768535 |
| 13 | 1 | 0 | 1.174499  | 0.357681  | -1.849160 |
| 14 | 7 | 0 | 1.246902  | 1.491506  | -0.089615 |
| 15 | 8 | 0 | -0.022080 | -0.375685 | -0.345645 |
| 16 | 6 | 0 | -0.523757 | 0.336084  | 0.799615  |
| 17 | 6 | 0 | 0.640610  | 1.233557  | 1.217795  |
| 18 | 1 | 0 | 0.297739  | 2.162219  | 1.676136  |
| 19 | 1 | 0 | 1.328937  | 0.724964  | 1.906834  |
| 20 | 1 | 0 | -0.799228 | -0.388606 | 1.563035  |
| 21 | 6 | 0 | -1.755974 | 1.152478  | 0.407894  |
| 22 | 1 | 0 | -2.179916 | 1.580830  | 1.327277  |
| 23 | 6 | 0 | -2.847005 | 0.341355  | -0.305267 |
| 24 | 1 | 0 | -2.372343 | -0.281692 | -1.073434 |
| 25 | 6 | 0 | -3.669327 | -0.544475 | 0.630214  |
| 26 | 1 | 0 | -4.144702 | 0.096258  | 1.378735  |
| 27 | 6 | 0 | -4.746012 | -1.302631 | -0.126009 |
| 28 | 1 | 0 | -5.374172 | -1.836862 | 0.594284  |
| 29 | 1 | 0 | -5.362144 | -0.609757 | -0.704819 |
| 30 | 8 | 0 | -1.409440 | 2.227834  | -0.464433 |
| 31 | 1 | 0 | -0.445743 | 2.195718  | -0.615960 |
| 32 | 8 | 0 | -3.764597 | 1.245545  | -0.903073 |
| 33 | 1 | 0 | -3.215185 | 1.951716  | -1.265024 |
| 34 | 8 | 0 | -2.851597 | -1.471814 | 1.327281  |
| 35 | 1 | 0 | -2.644727 | -2.163877 | 0.685944  |
| 36 | 8 | 0 | -4.062454 | -2.223576 | -0.973361 |
| 37 | 1 | 0 | -4.703115 | -2.855391 | -1.312510 |
| 38 | 6 | 0 | 2.537320  | 2.173332  | -0.075059 |
| 39 | 1 | 0 | 3.264581  | 1.620608  | 0.537978  |
| 40 | 1 | 0 | 2.914645  | 2.181836  | -1.101593 |
| 41 | 6 | 0 | 2.399943  | 3.598341  | 0.439025  |
| 42 | 1 | 0 | 3.354059  | 4.121347  | 0.348018  |
| 43 | 1 | 0 | 1.648858  | 4.144926  | -0.136871 |
| 44 | 1 | 0 | 2.107877  | 3.615692  | 1.491347  |

### Structure 27a (<sup>2</sup>E ax-ax) (M06-2X, DMSO)

Energy (Hartrees): = - 1016.1766646  
 No imaginary frequencies

Standard orientation:

| Center Number | Atomic Number | Atomic Type | Coordinates (Angstroms) |           |           |
|---------------|---------------|-------------|-------------------------|-----------|-----------|
|               |               |             | X                       | Y         | Z         |
| 1             | 6             | 0           | -2.778572               | -0.287278 | 0.278954  |
| 2             | 6             | 0           | -2.701945               | -1.446107 | 1.047378  |
| 3             | 6             | 0           | -3.612266               | -2.482646 | 0.846422  |
| 4             | 6             | 0           | -4.607035               | -2.363805 | -0.117826 |
| 5             | 6             | 0           | -4.690340               | -1.202372 | -0.883878 |
| 6             | 6             | 0           | -3.779304               | -0.171367 | -0.687461 |
| 7             | 1             | 0           | -1.928182               | -1.535760 | 1.800972  |
| 8             | 1             | 0           | -3.542049               | -3.383836 | 1.445290  |
| 9             | 1             | 0           | -5.314881               | -3.170007 | -0.272976 |
| 10            | 1             | 0           | -5.463673               | -1.102870 | -1.637361 |
| 11            | 1             | 0           | -3.832063               | 0.729406  | -1.289790 |
| 12            | 6             | 0           | -1.816651               | 0.872677  | 0.486861  |
| 13            | 1             | 0           | -2.332942               | 1.694145  | 0.987852  |
| 14            | 7             | 0           | -1.238337               | 1.313871  | -0.765268 |
| 15            | 8             | 0           | -0.719168               | 0.492455  | 1.320849  |
| 16            | 6             | 0           | 0.325380                | -0.013385 | 0.471093  |
| 17            | 6             | 0           | -0.153753               | 0.339759  | -0.957541 |
| 18            | 1             | 0           | 0.633992                | 0.760754  | -1.579376 |
| 19            | 1             | 0           | -0.543519               | -0.550988 | -1.451913 |
| 20            | 1             | 0           | 0.406327                | -1.093386 | 0.619599  |
| 21            | 6             | 0           | 1.622413                | 0.680381  | 0.897142  |
| 22            | 1             | 0           | 1.681177                | 1.667987  | 0.416945  |
| 23            | 6             | 0           | 2.906802                | -0.082007 | 0.584159  |
| 24            | 1             | 0           | 2.848158                | -1.061751 | 1.079255  |
| 25            | 6             | 0           | 3.159414                | -0.305695 | -0.905845 |
| 26            | 1             | 0           | 3.053661                | 0.645457  | -1.436925 |
| 27            | 6             | 0           | 4.546922                | -0.863506 | -1.167485 |
| 28            | 1             | 0           | 4.697334                | -0.930168 | -2.250008 |
| 29            | 1             | 0           | 5.309817                | -0.214055 | -0.732763 |
| 30            | 8             | 0           | 1.648747                | 0.838566  | 2.311369  |

|    |   |   |           |           |           |
|----|---|---|-----------|-----------|-----------|
| 31 | 1 | 0 | 0.766769  | 1.134382  | 2.566226  |
| 32 | 8 | 0 | 3.998955  | 0.663990  | 1.097331  |
| 33 | 1 | 0 | 3.729205  | 0.952739  | 1.976849  |
| 34 | 8 | 0 | 2.192594  | -1.202031 | -1.434276 |
| 35 | 1 | 0 | 2.497171  | -2.081896 | -1.176502 |
| 36 | 8 | 0 | 4.566006  | -2.161334 | -0.577543 |
| 37 | 1 | 0 | 5.344557  | -2.627210 | -0.895712 |
| 38 | 6 | 0 | -0.783074 | 2.714047  | -0.694210 |
| 39 | 1 | 0 | -0.297541 | 2.931517  | 0.268013  |
| 40 | 1 | 0 | -0.032165 | 2.853810  | -1.474432 |
| 41 | 6 | 0 | -1.939969 | 3.673253  | -0.927906 |
| 42 | 1 | 0 | -1.591453 | 4.707908  | -0.885548 |
| 43 | 1 | 0 | -2.386024 | 3.498111  | -1.909871 |
| 44 | 1 | 0 | -2.720518 | 3.553761  | -0.171927 |

-----

**Structure 27a (E<sub>2</sub> ec-ec) (M06-2X, DMSO)**

Energy (Hartrees): = - 1016.1751918  
 No imaginary frequencies

Standard orientation:

| Center<br>Number | Atomic<br>Number | Atomic<br>Type | Coordinates (Angstroms) |           |           |
|------------------|------------------|----------------|-------------------------|-----------|-----------|
|                  |                  |                | X                       | Y         | Z         |
| 1                | 6                | 0              | 2.998193                | -0.366340 | -0.096258 |
| 2                | 6                | 0              | 3.448543                | -0.229108 | 1.217553  |
| 3                | 6                | 0              | 4.780434                | -0.470554 | 1.526797  |
| 4                | 6                | 0              | 5.673174                | -0.847168 | 0.522766  |
| 5                | 6                | 0              | 5.228272                | -0.981778 | -0.787084 |
| 6                | 6                | 0              | 3.889181                | -0.743343 | -1.095286 |
| 7                | 1                | 0              | 2.745942                | 0.070338  | 1.987332  |
| 8                | 1                | 0              | 5.127966                | -0.365569 | 2.548302  |
| 9                | 1                | 0              | 6.713474                | -1.034215 | 0.764064  |
| 10               | 1                | 0              | 5.919069                | -1.273210 | -1.569932 |
| 11               | 1                | 0              | 3.535893                | -0.848280 | -2.116320 |
| 12               | 6                | 0              | 1.549858                | -0.092479 | -0.410011 |
| 13               | 1                | 0              | 1.360461                | -0.263120 | -1.486431 |
| 14               | 7                | 0              | 1.125240                | 1.238556  | -0.007163 |
| 15               | 8                | 0              | 0.723077                | -0.946966 | 0.362159  |
| 16               | 6                | 0              | -0.567069               | -0.316376 | 0.496624  |
| 17               | 6                | 0              | -0.334206               | 1.135744  | 0.049419  |
| 18               | 1                | 0              | -0.784381               | 1.308476  | -0.942793 |
| 19               | 1                | 0              | -0.755926               | 1.852747  | 0.747058  |
| 20               | 1                | 0              | -0.849950               | -0.389604 | 1.548697  |
| 21               | 6                | 0              | -1.544452               | -1.119019 | -0.368152 |
| 22               | 1                | 0              | -1.374644               | -0.864691 | -1.424980 |
| 23               | 6                | 0              | -3.035006               | -0.968815 | -0.071830 |
| 24               | 1                | 0              | -3.205265               | -1.263468 | 0.973238  |
| 25               | 6                | 0              | -3.591111               | 0.440532  | -0.269429 |
| 26               | 1                | 0              | -3.250074               | 0.838790  | -1.229657 |
| 27               | 6                | 0              | -5.109260               | 0.460337  | -0.238335 |
| 28               | 1                | 0              | -5.448593               | 1.479020  | -0.452682 |
| 29               | 1                | 0              | -5.518500               | -0.225738 | -0.982725 |
| 30               | 8                | 0              | -1.300926               | -2.508748 | -0.169849 |
| 31               | 1                | 0              | -0.342764               | -2.618190 | -0.183645 |
| 32               | 8                | 0              | -3.737888               | -1.836658 | -0.947376 |
| 33               | 1                | 0              | -3.255819               | -2.671514 | -0.932759 |
| 34               | 8                | 0              | -3.097618               | 1.296515  | 0.750030  |
| 35               | 1                | 0              | -3.642232               | 1.105038  | 1.524923  |
| 36               | 8                | 0              | -5.479069               | 0.077396  | 1.084313  |
| 37               | 1                | 0              | -6.409090               | 0.285365  | 1.211732  |
| 38               | 6                | 0              | 1.607402                | 2.286267  | -0.899753 |
| 39               | 1                | 0              | 2.696325                | 2.199207  | -0.959445 |
| 40               | 1                | 0              | 1.207329                | 2.138421  | -1.917712 |
| 41               | 6                | 0              | 1.233582                | 3.670115  | -0.392631 |
| 42               | 1                | 0              | 1.673335                | 4.437956  | -1.032421 |
| 43               | 1                | 0              | 0.151073                | 3.817547  | -0.389495 |
| 44               | 1                | 0              | 1.603863                | 3.814418  | 0.625237  |

-----

**Structure 27b (<sup>2</sup>E ec-ec H-bond O) (M06-2X, Gas Phase)**

Energy (Hartrees): = - 1016.155372  
 No imaginary frequencies

Standard orientation:

| Center<br>Number | Atomic<br>Number | Atomic<br>Type | Coordinates (Angstroms) |           |           |
|------------------|------------------|----------------|-------------------------|-----------|-----------|
|                  |                  |                | X                       | Y         | Z         |
| 1                | 6                | 0              | -2.850356               | -0.146371 | -0.413220 |
| 2                | 6                | 0              | -2.674732               | -1.069893 | 0.617936  |
| 3                | 6                | 0              | -3.766391               | -1.754107 | 1.131681  |
| 4                | 6                | 0              | -5.042885               | -1.515594 | 0.624623  |

|    |   |   |           |           |           |
|----|---|---|-----------|-----------|-----------|
| 5  | 6 | 0 | -5.221469 | -0.594830 | -0.399162 |
| 6  | 6 | 0 | -4.123010 | 0.085977  | -0.919009 |
| 7  | 1 | 0 | -1.678105 | -1.242540 | 1.010946  |
| 8  | 1 | 0 | -3.626541 | -2.474512 | 1.928894  |
| 9  | 1 | 0 | -5.894826 | -2.049227 | 1.029036  |
| 10 | 1 | 0 | -6.211951 | -0.408750 | -0.797021 |
| 11 | 1 | 0 | -4.256368 | 0.802477  | -1.723142 |
| 12 | 6 | 0 | -1.653869 | 0.592297  | -0.956058 |
| 13 | 1 | 0 | -1.965000 | 1.235283  | -1.801745 |
| 14 | 7 | 0 | -0.965160 | 1.364225  | 0.065544  |
| 15 | 8 | 0 | -0.673765 | -0.319888 | -1.429634 |
| 16 | 6 | 0 | 0.631741  | 0.123070  | -1.021915 |
| 17 | 6 | 0 | 0.380498  | 1.521910  | -0.470418 |
| 18 | 1 | 0 | 1.094124  | 1.800185  | 0.302708  |
| 19 | 1 | 0 | 0.424424  | 2.274693  | -1.275582 |
| 20 | 1 | 0 | 1.276703  | 0.119559  | -1.900346 |
| 21 | 6 | 0 | 1.151444  | -0.851356 | 0.049076  |
| 22 | 1 | 0 | 0.813557  | -0.500959 | 1.035933  |
| 23 | 6 | 0 | 2.668294  | -1.024871 | 0.079801  |
| 24 | 1 | 0 | 2.997178  | -1.351222 | -0.917384 |
| 25 | 6 | 0 | 3.436988  | 0.239961  | 0.455458  |
| 26 | 1 | 0 | 3.023971  | 0.644293  | 1.385357  |
| 27 | 6 | 0 | 4.915054  | -0.048696 | 0.658397  |
| 28 | 1 | 0 | 5.401392  | 0.852640  | 1.048171  |
| 29 | 1 | 0 | 5.037403  | -0.879207 | 1.356309  |
| 30 | 8 | 0 | 0.646753  | -2.157658 | -0.179500 |
| 31 | 1 | 0 | -0.196406 | -2.051817 | -0.638005 |
| 32 | 8 | 0 | 2.985727  | -2.004379 | 1.049695  |
| 33 | 1 | 0 | 2.372337  | -2.732655 | 0.901979  |
| 34 | 8 | 0 | 3.287741  | 1.231429  | -0.547527 |
| 35 | 1 | 0 | 3.935986  | 1.009322  | -1.227149 |
| 36 | 8 | 0 | 5.418529  | -0.366553 | -0.635652 |
| 37 | 1 | 0 | 6.352747  | -0.568815 | -0.569365 |
| 38 | 6 | 0 | -1.649399 | 2.601014  | 0.407859  |
| 39 | 1 | 0 | -1.697742 | 3.272691  | -0.468457 |
| 40 | 1 | 0 | -2.677556 | 2.342878  | 0.677261  |
| 41 | 6 | 0 | -0.977795 | 3.311649  | 1.574043  |
| 42 | 1 | 0 | -1.563728 | 4.180284  | 1.878833  |
| 43 | 1 | 0 | -0.891888 | 2.631016  | 2.422946  |
| 44 | 1 | 0 | 0.021871  | 3.660242  | 1.307420  |

-----

### Structure 27b (<sup>2</sup>E ec-ec H-bond N) (M06-2X, Gas Phase)

Energy (Hartrees): = - 1016.1580489  
 No imaginary frequencies

Standard orientation:

| Center<br>Number | Atomic<br>Number | Atomic<br>Type | Coordinates (Angstroms) |           |           |
|------------------|------------------|----------------|-------------------------|-----------|-----------|
|                  |                  |                | X                       | Y         | Z         |
| 1                | 6                | 0              | -1.949579               | -0.940343 | -0.456715 |
| 2                | 6                | 0              | -1.402698               | -1.511013 | 0.692326  |
| 3                | 6                | 0              | -1.965588               | -2.657983 | 1.233015  |
| 4                | 6                | 0              | -3.078470               | -3.242576 | 0.632093  |
| 5                | 6                | 0              | -3.623769               | -2.678441 | -0.513637 |
| 6                | 6                | 0              | -3.054651               | -1.530383 | -1.059230 |
| 7                | 1                | 0              | -0.536504               | -1.051561 | 1.155268  |
| 8                | 1                | 0              | -1.535629               | -3.100545 | 2.123549  |
| 9                | 1                | 0              | -3.515311               | -4.138852 | 1.056212  |
| 10               | 1                | 0              | -4.485360               | -3.133223 | -0.987514 |
| 11               | 1                | 0              | -3.470893               | -1.092877 | -1.961332 |
| 12               | 6                | 0              | -1.352727               | 0.323782  | -1.019039 |
| 13               | 1                | 0              | -1.768670               | 0.514341  | -2.026444 |
| 14               | 7                | 0              | -1.585574               | 1.485521  | -0.154814 |
| 15               | 8                | 0              | 0.053056                | 0.231965  | -1.104167 |
| 16               | 6                | 0              | 0.640488                | 1.487901  | -0.731782 |
| 17               | 6                | 0              | -0.560386               | 2.426543  | -0.607033 |
| 18               | 1                | 0              | -0.396329               | 3.216871  | 0.126796  |
| 19               | 1                | 0              | -0.822681               | 2.874103  | -1.578923 |
| 20               | 1                | 0              | 1.335750                | 1.786573  | -1.512840 |
| 21               | 6                | 0              | 1.398168                | 1.338071  | 0.588373  |
| 22               | 1                | 0              | 2.013412                | 2.237617  | 0.732469  |
| 23               | 6                | 0              | 2.316964                | 0.112724  | 0.652638  |
| 24               | 1                | 0              | 1.728490                | -0.777449 | 0.397167  |
| 25               | 6                | 0              | 3.526322                | 0.186036  | -0.277659 |
| 26               | 1                | 0              | 4.109189                | 1.075495  | -0.020167 |
| 27               | 6                | 0              | 4.403445                | -1.045062 | -0.117845 |
| 28               | 1                | 0              | 5.314353                | -0.908641 | -0.711566 |
| 29               | 1                | 0              | 4.655696                | -1.183334 | 0.936565  |
| 30               | 8                | 0              | 0.519060                | 1.241836  | 1.707947  |
| 31               | 1                | 0              | -0.395704               | 1.182238  | 1.384090  |
| 32               | 8                | 0              | 2.831721                | 0.011618  | 1.968642  |
| 33               | 1                | 0              | 2.083946                | 0.180756  | 2.552792  |
| 34               | 8                | 0              | 3.137057                | 0.317329  | -1.631497 |
| 35               | 1                | 0              | 2.755195                | -0.532821 | -1.882600 |

|    |   |   |           |           |           |
|----|---|---|-----------|-----------|-----------|
| 36 | 8 | 0 | 3.634829  | -2.131279 | -0.622336 |
| 37 | 1 | 0 | 4.141764  | -2.939702 | -0.538228 |
| 38 | 6 | 0 | -2.955524 | 1.980733  | -0.204970 |
| 39 | 1 | 0 | -3.209803 | 2.292616  | -1.232809 |
| 40 | 1 | 0 | -3.612199 | 1.146844  | 0.056146  |
| 41 | 6 | 0 | -3.174317 | 3.134287  | 0.762779  |
| 42 | 1 | 0 | -4.227692 | 3.418026  | 0.780451  |
| 43 | 1 | 0 | -2.876371 | 2.842087  | 1.771580  |
| 44 | 1 | 0 | -2.597500 | 4.015380  | 0.474434  |

### Structure 27b (<sup>2</sup>E ax-ec) (M06-2X, Gas Phase)

Energy (Hartrees): = - 1016.149514

No imaginary frequencies

Standard orientation:

| Center<br>Number | Atomic<br>Number | Atomic<br>Type | Coordinates (Angstroms) |           |           |
|------------------|------------------|----------------|-------------------------|-----------|-----------|
|                  |                  |                | X                       | Y         | Z         |
| 1                | 6                | 0              | 2.903031                | 0.010924  | -0.609792 |
| 2                | 6                | 0              | 3.070492                | 1.218868  | 0.060138  |
| 3                | 6                | 0              | 4.345331                | 1.654098  | 0.406117  |
| 4                | 6                | 0              | 5.458773                | 0.888363  | 0.077742  |
| 5                | 6                | 0              | 5.295650                | -0.311252 | -0.608650 |
| 6                | 6                | 0              | 4.021957                | -0.744079 | -0.954470 |
| 7                | 1                | 0              | 2.200096                | 1.812407  | 0.312070  |
| 8                | 1                | 0              | 4.469190                | 2.594387  | 0.929990  |
| 9                | 1                | 0              | 6.450985                | 1.228782  | 0.348656  |
| 10               | 1                | 0              | 6.160579                | -0.907100 | -0.875058 |
| 11               | 1                | 0              | 3.886867                | -1.684547 | -1.478481 |
| 12               | 6                | 0              | 1.536945                | -0.528225 | -0.936289 |
| 13               | 1                | 0              | 1.576306                | -1.045744 | -1.904292 |
| 14               | 7                | 0              | 0.975582                | -1.464928 | 0.023675  |
| 15               | 8                | 0              | 0.589409                | 0.539758  | -1.047868 |
| 16               | 6                | 0              | -0.717240               | -0.019348 | -0.859555 |
| 17               | 6                | 0              | -0.428471               | -1.472367 | -0.401635 |
| 18               | 1                | 0              | -1.082961               | -1.812725 | 0.396743  |
| 19               | 1                | 0              | -0.550994               | -2.155772 | -1.243835 |
| 20               | 1                | 0              | -1.251768               | 0.007934  | -1.812997 |
| 21               | 6                | 0              | -1.433669               | 0.858223  | 0.171070  |
| 22               | 1                | 0              | -1.134074               | 0.551394  | 1.184784  |
| 23               | 6                | 0              | -2.958640               | 0.844909  | 0.096846  |
| 24               | 1                | 0              | -3.253350               | 1.162858  | -0.913249 |
| 25               | 6                | 0              | -3.593388               | -0.513966 | 0.379088  |
| 26               | 1                | 0              | -3.198523               | -0.906428 | 1.322096  |
| 27               | 6                | 0              | -5.105453               | -0.406199 | 0.486890  |
| 28               | 1                | 0              | -5.507481               | -1.372468 | 0.811532  |
| 29               | 1                | 0              | -5.370373               | 0.375518  | 1.201466  |
| 30               | 8                | 0              | -1.087331               | 2.222504  | -0.023381 |
| 31               | 1                | 0              | -0.183154               | 2.233304  | -0.356857 |
| 32               | 8                | 0              | -3.456723               | 1.748269  | 1.065226  |
| 33               | 1                | 0              | -2.935982               | 2.553473  | 0.971145  |
| 34               | 8                | 0              | -3.260235               | -1.436844 | -0.643948 |
| 35               | 1                | 0              | -3.880708               | -1.261212 | -1.362006 |
| 36               | 8                | 0              | -5.555260               | -0.094656 | -0.827940 |
| 37               | 1                | 0              | -6.506285               | 0.021660  | -0.817488 |
| 38               | 6                | 0              | 1.159315                | -1.091084 | 1.439279  |
| 39               | 1                | 0              | 1.161153                | -0.001848 | 1.581213  |
| 40               | 1                | 0              | 0.290940                | -1.473894 | 1.980296  |
| 41               | 6                | 0              | 2.414774                | -1.705920 | 2.047471  |
| 42               | 1                | 0              | 2.425545                | -1.539332 | 3.127240  |
| 43               | 1                | 0              | 2.424154                | -2.780682 | 1.858223  |
| 44               | 1                | 0              | 3.325445                | -1.275382 | 1.630864  |

### Structure 27b (<sup>2</sup>E ec-ec H-bond O) (M06-2X, Benzene)

Energy (Hartrees): = - 1016.175563

No imaginary frequencies

Standard orientation:

| Center<br>Number | Atomic<br>Number | Atomic<br>Type | Coordinates (Angstroms) |           |           |
|------------------|------------------|----------------|-------------------------|-----------|-----------|
|                  |                  |                | X                       | Y         | Z         |
| 1                | 6                | 0              | -2.861018               | -0.150576 | -0.414099 |
| 2                | 6                | 0              | -2.693607               | -1.087703 | 0.606611  |
| 3                | 6                | 0              | -3.792982               | -1.755943 | 1.125843  |
| 4                | 6                | 0              | -5.069908               | -1.487053 | 0.634740  |
| 5                | 6                | 0              | -5.240753               | -0.552624 | -0.378605 |
| 6                | 6                | 0              | -4.134516               | 0.111221  | -0.904846 |
| 7                | 1                | 0              | -1.697542               | -1.283798 | 0.990368  |
| 8                | 1                | 0              | -3.659019               | -2.486794 | 1.914879  |
| 9                | 1                | 0              | -5.928309               | -2.006999 | 1.043960  |
| 10               | 1                | 0              | -6.231844               | -0.341943 | -0.763232 |

|    |   |   |           |           |           |
|----|---|---|-----------|-----------|-----------|
| 11 | 1 | 0 | -4.262331 | 0.838766  | -1.700165 |
| 12 | 6 | 0 | -1.657036 | 0.578603  | -0.955163 |
| 13 | 1 | 0 | -1.960185 | 1.219690  | -1.804001 |
| 14 | 7 | 0 | -0.966183 | 1.350123  | 0.066067  |
| 15 | 8 | 0 | -0.680224 | -0.344340 | -1.418110 |
| 16 | 6 | 0 | 0.629729  | 0.104489  | -1.025481 |
| 17 | 6 | 0 | 0.380277  | 1.503059  | -0.472080 |
| 18 | 1 | 0 | 1.092371  | 1.778678  | 0.303708  |
| 19 | 1 | 0 | 0.424957  | 2.256836  | -1.275669 |
| 20 | 1 | 0 | 1.265541  | 0.102045  | -1.910567 |
| 21 | 6 | 0 | 1.161217  | -0.869166 | 0.038721  |
| 22 | 1 | 0 | 0.811768  | -0.534091 | 1.026645  |
| 23 | 6 | 0 | 2.679990  | -1.021060 | 0.080551  |
| 24 | 1 | 0 | 3.018123  | -1.357156 | -0.909925 |
| 25 | 6 | 0 | 3.432243  | 0.258857  | 0.441045  |
| 26 | 1 | 0 | 3.001110  | 0.684775  | 1.352808  |
| 27 | 6 | 0 | 4.909536  | -0.005030 | 0.674578  |
| 28 | 1 | 0 | 5.380312  | 0.917717  | 1.032284  |
| 29 | 1 | 0 | 5.038082  | -0.799186 | 1.412823  |
| 30 | 8 | 0 | 0.678663  | -2.182735 | -0.207493 |
| 31 | 1 | 0 | -0.183197 | -2.081292 | -0.631346 |
| 32 | 8 | 0 | 3.001808  | -1.987811 | 1.064615  |
| 33 | 1 | 0 | 2.402108  | -2.727282 | 0.915580  |
| 34 | 8 | 0 | 3.289660  | 1.222289  | -0.591858 |
| 35 | 1 | 0 | 3.942182  | 0.978785  | -1.260505 |
| 36 | 8 | 0 | 5.438249  | -0.375218 | -0.595294 |
| 37 | 1 | 0 | 6.385126  | -0.507132 | -0.511406 |
| 38 | 6 | 0 | -1.642574 | 2.594218  | 0.404583  |
| 39 | 1 | 0 | -1.689926 | 3.260848  | -0.474854 |
| 40 | 1 | 0 | -2.670806 | 2.345297  | 0.681451  |
| 41 | 6 | 0 | -0.961149 | 3.306926  | 1.562781  |
| 42 | 1 | 0 | -1.546335 | 4.175187  | 1.871768  |
| 43 | 1 | 0 | -0.866368 | 2.630329  | 2.414894  |
| 44 | 1 | 0 | 0.035526  | 3.659074  | 1.288092  |

### Structure 27b (<sup>2</sup>E ec-ec H-bond N) (M06-2X, Benzene)

Energy (Hartrees): = - 1016.178868  
 No imaginary frequencies

Standard orientation:

| Center<br>Number | Atomic<br>Number | Atomic<br>Type | Coordinates (Angstroms) |           |           |
|------------------|------------------|----------------|-------------------------|-----------|-----------|
|                  |                  |                | X                       | Y         | Z         |
| 1                | 6                | 0              | -1.948024               | -0.943579 | -0.455697 |
| 2                | 6                | 0              | -1.399060               | -1.512251 | 0.693781  |
| 3                | 6                | 0              | -1.955220               | -2.662842 | 1.234811  |
| 4                | 6                | 0              | -3.065438               | -3.253068 | 0.633980  |
| 5                | 6                | 0              | -3.613745               | -2.691026 | -0.511844 |
| 6                | 6                | 0              | -3.051051               | -1.539587 | -1.057772 |
| 7                | 1                | 0              | -0.535218               | -1.049764 | 1.158433  |
| 8                | 1                | 0              | -1.522362               | -3.103068 | 2.125509  |
| 9                | 1                | 0              | -3.497764               | -4.151792 | 1.058378  |
| 10               | 1                | 0              | -4.474065               | -3.149707 | -0.985052 |
| 11               | 1                | 0              | -3.471544               | -1.103778 | -1.958850 |
| 12               | 6                | 0              | -1.358157               | 0.323942  | -1.020408 |
| 13               | 1                | 0              | -1.778740               | 0.512991  | -2.025010 |
| 14               | 7                | 0              | -1.584590               | 1.486621  | -0.156244 |
| 15               | 8                | 0              | 0.050121                | 0.232812  | -1.113597 |
| 16               | 6                | 0              | 0.636702                | 1.491812  | -0.746945 |
| 17               | 6                | 0              | -0.565337               | 2.428082  | -0.624645 |
| 18               | 1                | 0              | -0.400337               | 3.228218  | 0.097907  |
| 19               | 1                | 0              | -0.834645               | 2.862733  | -1.599781 |
| 20               | 1                | 0              | 1.328623                | 1.791429  | -1.530496 |
| 21               | 6                | 0              | 1.398149                | 1.351041  | 0.572560  |
| 22               | 1                | 0              | 2.014206                | 2.251311  | 0.706096  |
| 23               | 6                | 0              | 2.313295                | 0.122793  | 0.649082  |
| 24               | 1                | 0              | 1.722379                | -0.766331 | 0.396611  |
| 25               | 6                | 0              | 3.530363                | 0.181585  | -0.272373 |
| 26               | 1                | 0              | 4.120629                | 1.066698  | -0.016496 |
| 27               | 6                | 0              | 4.396403                | -1.055867 | -0.106804 |
| 28               | 1                | 0              | 5.306337                | -0.932352 | -0.704822 |
| 29               | 1                | 0              | 4.659716                | -1.191146 | 0.945593  |
| 30               | 8                | 0              | 0.518232                | 1.267234  | 1.694414  |
| 31               | 1                | 0              | -0.395928               | 1.201852  | 1.365682  |
| 32               | 8                | 0              | 2.816439                | 0.026230  | 1.971951  |
| 33               | 1                | 0              | 2.060238                | 0.197600  | 2.545222  |
| 34               | 8                | 0              | 3.149300                | 0.309758  | -1.630685 |
| 35               | 1                | 0              | 2.757175                | -0.537564 | -1.876399 |
| 36               | 8                | 0              | 3.618905                | -2.143272 | -0.596064 |
| 37               | 1                | 0              | 4.150294                | -2.941684 | -0.566244 |
| 38               | 6                | 0              | -2.956037               | 1.983349  | -0.194918 |
| 39               | 1                | 0              | -3.216832               | 2.298228  | -1.219471 |
| 40               | 1                | 0              | -3.613120               | 1.151180  | 0.069729  |
| 41               | 6                | 0              | -3.167581               | 3.133057  | 0.777559  |



|    |   |   |           |          |          |
|----|---|---|-----------|----------|----------|
| 42 | 1 | 0 | -4.221144 | 3.418070 | 0.798848 |
| 43 | 1 | 0 | -2.869921 | 2.838038 | 1.786318 |
| 44 | 1 | 0 | -2.591396 | 4.015744 | 0.491629 |

### Structure 27b (<sup>2</sup>E ax-ec) (M06-2X, Benzene)

Energy (Hartrees): = - 1016.1693149  
No imaginary frequencies

Standard orientation:

| Center Number | Atomic Number | Atomic Type | Coordinates (Angstroms) |           |           |
|---------------|---------------|-------------|-------------------------|-----------|-----------|
|               |               |             | X                       | Y         | Z         |
| 1             | 6             | 0           | 2.909596                | 0.017147  | -0.606009 |
| 2             | 6             | 0           | 3.087873                | 1.221481  | 0.068504  |
| 3             | 6             | 0           | 4.367920                | 1.650202  | 0.405475  |
| 4             | 6             | 0           | 5.475577                | 0.880589  | 0.065381  |
| 5             | 6             | 0           | 5.301259                | -0.317348 | -0.621875 |
| 6             | 6             | 0           | 4.022767                | -0.743754 | -0.959125 |
| 7             | 1             | 0           | 2.223755                | 1.819917  | 0.331008  |
| 8             | 1             | 0           | 4.500213                | 2.588387  | 0.931654  |
| 9             | 1             | 0           | 6.471831                | 1.215749  | 0.329096  |
| 10            | 1             | 0           | 6.161529                | -0.917076 | -0.895723 |
| 11            | 1             | 0           | 3.880150                | -1.681714 | -1.486010 |
| 12            | 6             | 0           | 1.539398                | -0.514544 | -0.930971 |
| 13            | 1             | 0           | 1.573977                | -1.022735 | -1.903878 |
| 14            | 7             | 0           | 0.977465                | -1.459638 | 0.021802  |
| 15            | 8             | 0           | 0.592781                | 0.555986  | -1.026835 |
| 16            | 6             | 0           | -0.715300               | -0.008242 | -0.854592 |
| 17            | 6             | 0           | -0.427122               | -1.464190 | -0.405497 |
| 18            | 1             | 0           | -1.080362               | -1.807171 | 0.392863  |
| 19            | 1             | 0           | -0.547561               | -2.142501 | -1.252064 |
| 20            | 1             | 0           | -1.240747               | 0.026680  | -1.812881 |
| 21            | 6             | 0           | -1.440621               | 0.859303  | 0.178221  |
| 22            | 1             | 0           | -1.141507               | 0.548150  | 1.190352  |
| 23            | 6             | 0           | -2.965792               | 0.842491  | 0.101066  |
| 24            | 1             | 0           | -3.258880               | 1.171728  | -0.905651 |
| 25            | 6             | 0           | -3.599962               | -0.520617 | 0.367455  |
| 26            | 1             | 0           | -3.205587               | -0.925221 | 1.305353  |
| 27            | 6             | 0           | -5.112150               | -0.423067 | 0.474668  |
| 28            | 1             | 0           | -5.507701               | -1.401911 | 0.767971  |
| 29            | 1             | 0           | -5.391212               | 0.328343  | 1.216488  |
| 30            | 8             | 0           | -1.098208               | 2.227462  | -0.009015 |
| 31            | 1             | 0           | -0.180679               | 2.242397  | -0.305025 |
| 32            | 8             | 0           | -3.466169               | 1.737465  | 1.078373  |
| 33            | 1             | 0           | -2.948515               | 2.545421  | 0.988804  |
| 34            | 8             | 0           | -3.264300               | -1.429102 | -0.669184 |
| 35            | 1             | 0           | -3.881416               | -1.237478 | -1.386593 |
| 36            | 8             | 0           | -5.566783               | -0.069756 | -0.828257 |
| 37            | 1             | 0           | -6.526446               | -0.070147 | -0.833329 |
| 38            | 6             | 0           | 1.159863                | -1.097665 | 1.441373  |
| 39            | 1             | 0           | 1.172092                | -0.009746 | 1.591064  |
| 40            | 1             | 0           | 0.287742                | -1.477248 | 1.978450  |
| 41            | 6             | 0           | 2.407644                | -1.727995 | 2.046895  |
| 42            | 1             | 0           | 2.421296                | -1.563076 | 3.127500  |
| 43            | 1             | 0           | 2.406559                | -2.803833 | 1.859219  |
| 44            | 1             | 0           | 3.324949                | -1.308632 | 1.632244  |

### Structure 27b (<sup>2</sup>E ec-ec H-bond O) (M06-2X, DMSO)

Energy (Hartrees): = - 1016.1784942  
No imaginary frequencies

Standard orientation:

| Center Number | Atomic Number | Atomic Type | Coordinates (Angstroms) |           |           |
|---------------|---------------|-------------|-------------------------|-----------|-----------|
|               |               |             | X                       | Y         | Z         |
| 1             | 6             | 0           | -2.873936               | -0.157256 | -0.406200 |
| 2             | 6             | 0           | -2.723452               | -1.141432 | 0.573061  |
| 3             | 6             | 0           | -3.837621               | -1.793613 | 1.084379  |
| 4             | 6             | 0           | -5.112943               | -1.460749 | 0.627101  |
| 5             | 6             | 0           | -5.266885               | -0.478306 | -0.344215 |
| 6             | 6             | 0           | -4.146436               | 0.169445  | -0.862505 |
| 7             | 1             | 0           | -1.730494               | -1.393757 | 0.932215  |
| 8             | 1             | 0           | -3.715787               | -2.559825 | 1.841647  |
| 9             | 1             | 0           | -5.982408               | -1.967790 | 1.029626  |
| 10            | 1             | 0           | -6.256207               | -0.216008 | -0.701113 |
| 11            | 1             | 0           | -4.261572               | 0.934333  | -1.624310 |
| 12            | 6             | 0           | -1.658162               | 0.558045  | -0.939310 |
| 13            | 1             | 0           | -1.947582               | 1.199793  | -1.790285 |
| 14            | 7             | 0           | -0.969864               | 1.329435  | 0.086645  |
| 15            | 8             | 0           | -0.686927               | -0.378994 | -1.386853 |
| 16            | 6             | 0           | 0.627706                | 0.078264  | -1.013023 |

|    |   |   |           |           |           |
|----|---|---|-----------|-----------|-----------|
| 17 | 6 | 0 | 0.380526  | 1.474489  | -0.452137 |
| 18 | 1 | 0 | 1.090412  | 1.743952  | 0.327983  |
| 19 | 1 | 0 | 0.422836  | 2.231078  | -1.251866 |
| 20 | 1 | 0 | 1.251033  | 0.081259  | -1.907091 |
| 21 | 6 | 0 | 1.179655  | -0.897085 | 0.036683  |
| 22 | 1 | 0 | 0.826885  | -0.582742 | 1.029976  |
| 23 | 6 | 0 | 2.700376  | -1.020535 | 0.076528  |
| 24 | 1 | 0 | 3.041198  | -1.353067 | -0.914155 |
| 25 | 6 | 0 | 3.429368  | 0.275858  | 0.428098  |
| 26 | 1 | 0 | 2.978027  | 0.713537  | 1.323999  |
| 27 | 6 | 0 | 4.907380  | 0.047044  | 0.687577  |
| 28 | 1 | 0 | 5.353797  | 0.992971  | 1.011771  |
| 29 | 1 | 0 | 5.048038  | -0.707998 | 1.463906  |
| 30 | 8 | 0 | 0.720577  | -2.217886 | -0.228975 |
| 31 | 1 | 0 | -0.164958 | -2.122761 | -0.602715 |
| 32 | 8 | 0 | 3.039250  | -1.983823 | 1.061790  |
| 33 | 1 | 0 | 2.446976  | -2.730253 | 0.915697  |
| 34 | 8 | 0 | 3.286103  | 1.216342  | -0.627418 |
| 35 | 1 | 0 | 3.940095  | 0.954925  | -1.288764 |
| 36 | 8 | 0 | 5.466052  | -0.369676 | -0.556042 |
| 37 | 1 | 0 | 6.424241  | -0.326354 | -0.487168 |
| 38 | 6 | 0 | -1.637687 | 2.591868  | 0.386196  |
| 39 | 1 | 0 | -1.678051 | 3.226890  | -0.515116 |
| 40 | 1 | 0 | -2.668973 | 2.363045  | 0.669884  |
| 41 | 6 | 0 | -0.949605 | 3.337297  | 1.518615  |
| 42 | 1 | 0 | -1.526850 | 4.222545  | 1.793108  |
| 43 | 1 | 0 | -0.863259 | 2.695392  | 2.398857  |
| 44 | 1 | 0 | 0.051507  | 3.667084  | 1.232293  |

-----

**Structure 27b (<sup>2</sup>E ec-ec H-bond N) (M06-2X, DMSO)**

Energy (Hartrees): = - 1016.18208  
 No imaginary frequencies

Standard orientation:

| Center<br>Number | Atomic<br>Number | Atomic<br>Type | Coordinates (Angstroms) |           |           |
|------------------|------------------|----------------|-------------------------|-----------|-----------|
|                  |                  |                | X                       | Y         | Z         |
| 1                | 6                | 0              | -1.944277               | -0.946153 | -0.458014 |
| 2                | 6                | 0              | -1.379039               | -1.528007 | 0.678239  |
| 3                | 6                | 0              | -1.924098               | -2.689081 | 1.211471  |
| 4                | 6                | 0              | -3.038728               | -3.277465 | 0.614791  |
| 5                | 6                | 0              | -3.603502               | -2.701404 | -0.517216 |
| 6                | 6                | 0              | -3.052738               | -1.539167 | -1.054585 |
| 7                | 1                | 0              | -0.512709               | -1.068137 | 1.141917  |
| 8                | 1                | 0              | -1.480423               | -3.138713 | 2.092478  |
| 9                | 1                | 0              | -3.462319               | -4.183825 | 1.032276  |
| 10               | 1                | 0              | -4.468185               | -3.156642 | -0.986279 |
| 11               | 1                | 0              | -3.487408               | -1.090553 | -1.942446 |
| 12               | 6                | 0              | -1.367759               | 0.329654  | -1.018684 |
| 13               | 1                | 0              | -1.798994               | 0.524405  | -2.015791 |
| 14               | 7                | 0              | -1.590996               | 1.483810  | -0.142449 |
| 15               | 8                | 0              | 0.042746                | 0.241923  | -1.125611 |
| 16               | 6                | 0              | 0.627537                | 1.499093  | -0.743086 |
| 17               | 6                | 0              | -0.575666               | 2.430558  | -0.617117 |
| 18               | 1                | 0              | -0.411413               | 3.234569  | 0.100847  |
| 19               | 1                | 0              | -0.852725               | 2.858417  | -1.591690 |
| 20               | 1                | 0              | 1.320568                | 1.810307  | -1.520510 |
| 21               | 6                | 0              | 1.385547                | 1.348178  | 0.577504  |
| 22               | 1                | 0              | 1.999541                | 2.248210  | 0.717655  |
| 23               | 6                | 0              | 2.299492                | 0.118225  | 0.645843  |
| 24               | 1                | 0              | 1.713875                | -0.763450 | 0.357602  |
| 25               | 6                | 0              | 3.539749                | 0.200247  | -0.241974 |
| 26               | 1                | 0              | 4.123507                | 1.078279  | 0.049728  |
| 27               | 6                | 0              | 4.402374                | -1.041200 | -0.093480 |
| 28               | 1                | 0              | 5.319836                | -0.904941 | -0.675294 |
| 29               | 1                | 0              | 4.656991                | -1.205367 | 0.956820  |
| 30               | 8                | 0              | 0.498509                | 1.253573  | 1.695425  |
| 31               | 1                | 0              | -0.414004               | 1.203293  | 1.354472  |
| 32               | 8                | 0              | 2.766039                | -0.017419 | 1.980852  |
| 33               | 1                | 0              | 1.993289                | 0.153204  | 2.532904  |
| 34               | 8                | 0              | 3.190583                | 0.361978  | -1.607483 |
| 35               | 1                | 0              | 2.829414                | -0.490098 | -1.883889 |
| 36               | 8                | 0              | 3.633811                | -2.122435 | -0.615815 |
| 37               | 1                | 0              | 4.216343                | -2.877344 | -0.737801 |
| 38               | 6                | 0              | -2.964332               | 1.982149  | -0.188075 |
| 39               | 1                | 0              | -3.215954               | 2.293935  | -1.214364 |
| 40               | 1                | 0              | -3.625009               | 1.151421  | 0.073638  |
| 41               | 6                | 0              | -3.178308               | 3.134176  | 0.780376  |
| 42               | 1                | 0              | -4.231536               | 3.421728  | 0.790699  |
| 43               | 1                | 0              | -2.891391               | 2.842020  | 1.793735  |
| 44               | 1                | 0              | -2.595329               | 4.012835  | 0.495538  |

-----

**Structure 27b (<sup>2</sup>E ax-ec) (M06-2X, DMSO)**

Energy (Hartrees): = - 1016.1730778  
 No imaginary frequencies

Standard orientation:

| Center<br>Number | Atomic<br>Number | Atomic<br>Type | Coordinates (Angstroms) |           |           |
|------------------|------------------|----------------|-------------------------|-----------|-----------|
|                  |                  |                | X                       | Y         | Z         |
| 1                | 6                | 0              | 2.911210                | -0.004026 | -0.612404 |
| 2                | 6                | 0              | 3.090335                | 1.210414  | 0.045551  |
| 3                | 6                | 0              | 4.370891                | 1.635161  | 0.388923  |
| 4                | 6                | 0              | 5.477306                | 0.852316  | 0.071488  |
| 5                | 6                | 0              | 5.301957                | -0.353443 | -0.603472 |
| 6                | 6                | 0              | 4.022958                | -0.776019 | -0.947547 |
| 7                | 1                | 0              | 2.229705                | 1.819918  | 0.295399  |
| 8                | 1                | 0              | 4.504519                | 2.579870  | 0.903623  |
| 9                | 1                | 0              | 6.473245                | 1.184250  | 0.341606  |
| 10               | 1                | 0              | 6.161214                | -0.961323 | -0.863173 |
| 11               | 1                | 0              | 3.879772                | -1.717840 | -1.468126 |
| 12               | 6                | 0              | 1.541727                | -0.540935 | -0.930821 |
| 13               | 1                | 0              | 1.580640                | -1.081097 | -1.885445 |
| 14               | 7                | 0              | 0.975398                | -1.455839 | 0.051710  |
| 15               | 8                | 0              | 0.598231                | 0.528101  | -1.062735 |
| 16               | 6                | 0              | -0.712401               | -0.028400 | -0.871566 |
| 17               | 6                | 0              | -0.427853               | -1.472478 | -0.388291 |
| 18               | 1                | 0              | -1.084905               | -1.794969 | 0.415647  |
| 19               | 1                | 0              | -0.534615               | -2.166897 | -1.223515 |
| 20               | 1                | 0              | -1.242035               | -0.015324 | -1.827661 |
| 21               | 6                | 0              | -1.433041               | 0.860066  | 0.146298  |
| 22               | 1                | 0              | -1.132574               | 0.569406  | 1.163080  |
| 23               | 6                | 0              | -2.957353               | 0.839132  | 0.074846  |
| 24               | 1                | 0              | -3.254731               | 1.154598  | -0.935204 |
| 25               | 6                | 0              | -3.582814               | -0.525247 | 0.358337  |
| 26               | 1                | 0              | -3.157666               | -0.935563 | 1.279817  |
| 27               | 6                | 0              | -5.090227               | -0.436783 | 0.514190  |
| 28               | 1                | 0              | -5.469921               | -1.424452 | 0.795654  |
| 29               | 1                | 0              | -5.352751               | 0.288469  | 1.287550  |
| 30               | 8                | 0              | -1.091090               | 2.225476  | -0.073012 |
| 31               | 1                | 0              | -0.149580               | 2.238094  | -0.283543 |
| 32               | 8                | 0              | -3.455454               | 1.750325  | 1.041692  |
| 33               | 1                | 0              | -2.923441               | 2.549072  | 0.949126  |
| 34               | 8                | 0              | -3.277312               | -1.426966 | -0.695837 |
| 35               | 1                | 0              | -3.906127               | -1.215433 | -1.398064 |
| 36               | 8                | 0              | -5.598168               | -0.049350 | -0.760299 |
| 37               | 1                | 0              | -6.548667               | -0.194983 | -0.763612 |
| 38               | 6                | 0              | 1.136268                | -1.028643 | 1.458039  |
| 39               | 1                | 0              | 1.129612                | 0.064415  | 1.557804  |
| 40               | 1                | 0              | 0.262828                | -1.395759 | 2.000814  |
| 41               | 6                | 0              | 2.385798                | -1.611459 | 2.106501  |
| 42               | 1                | 0              | 2.379434                | -1.399866 | 3.179051  |
| 43               | 1                | 0              | 2.405427                | -2.695553 | 1.970223  |
| 44               | 1                | 0              | 3.304602                | -1.196788 | 1.688079  |

**Structure 27c ( $^5C_2$  ec-ec) (M06-2X, Gas Phase)**

Energy (Hartrees): = - 1016.1554255  
 No imaginary frequencies

Standard orientation:

| Center<br>Number | Atomic<br>Number | Atomic<br>Type | Coordinates (Angstroms) |           |           |
|------------------|------------------|----------------|-------------------------|-----------|-----------|
|                  |                  |                | X                       | Y         | Z         |
| 1                | 6                | 0              | -1.083353               | 1.593149  | 0.194756  |
| 2                | 6                | 0              | 0.147720                | 2.270818  | -0.399897 |
| 3                | 6                | 0              | -1.159421               | 0.172077  | -0.363274 |
| 4                | 1                | 0              | 0.236974                | 3.262071  | 0.042850  |
| 5                | 1                | 0              | 0.041532                | 2.380771  | -1.494519 |
| 6                | 1                | 0              | -1.990530               | 2.137847  | -0.058963 |
| 7                | 1                | 0              | -1.270449               | 0.200330  | -1.458644 |
| 8                | 8                | 0              | 0.068450                | -0.485557 | -0.043812 |
| 9                | 7                | 0              | 1.339361                | 1.487404  | -0.057301 |
| 10               | 6                | 0              | -2.257666               | -0.703521 | 0.239164  |
| 11               | 1                | 0              | -2.293700               | -0.503567 | 1.317634  |
| 12               | 6                | 0              | -3.621672               | -0.430259 | -0.375034 |
| 13               | 1                | 0              | -3.571670               | -0.677770 | -1.445413 |
| 14               | 6                | 0              | -4.688557               | -1.300433 | 0.263500  |
| 15               | 1                | 0              | -4.689442               | -1.117554 | 1.345261  |
| 16               | 1                | 0              | -4.477868               | -2.354090 | 0.066309  |
| 17               | 8                | 0              | -1.992977               | -2.068964 | -0.019864 |
| 18               | 1                | 0              | -1.046581               | -2.192256 | 0.110247  |
| 19               | 8                | 0              | -3.948639               | 0.932576  | -0.194675 |
| 20               | 1                | 0              | -4.894985               | 0.997206  | -0.365528 |
| 21               | 8                | 0              | -5.918491               | -0.883537 | -0.321043 |
| 22               | 1                | 0              | -6.643829               | -1.284225 | 0.160429  |
| 23               | 8                | 0              | -0.978698               | 1.575798  | 1.602926  |

|    |   |   |           |           |           |
|----|---|---|-----------|-----------|-----------|
| 24 | 1 | 0 | -0.087381 | 1.257964  | 1.790609  |
| 25 | 6 | 0 | 2.570825  | 2.140022  | -0.510723 |
| 26 | 1 | 0 | 2.568933  | 2.251278  | -1.610214 |
| 27 | 1 | 0 | 3.405350  | 1.485929  | -0.256325 |
| 28 | 6 | 0 | 2.390131  | -0.735704 | -0.267169 |
| 29 | 6 | 0 | 2.676052  | -1.009410 | 1.069827  |
| 30 | 6 | 0 | 3.189104  | -1.276244 | -1.266970 |
| 31 | 6 | 0 | 3.757717  | -1.813937 | 1.399374  |
| 32 | 1 | 0 | 2.042031  | -0.586236 | 1.840048  |
| 33 | 6 | 0 | 4.276461  | -2.081496 | -0.937643 |
| 34 | 1 | 0 | 2.962587  | -1.066389 | -2.307255 |
| 35 | 6 | 0 | 4.561374  | -2.349647 | 0.395187  |
| 36 | 1 | 0 | 3.976758  | -2.025995 | 2.439259  |
| 37 | 1 | 0 | 4.896860  | -2.499489 | -1.721246 |
| 38 | 1 | 0 | 5.406573  | -2.976267 | 0.654194  |
| 39 | 6 | 0 | 1.206080  | 0.135966  | -0.602971 |
| 40 | 1 | 0 | 1.075689  | 0.182266  | -1.703637 |
| 41 | 6 | 0 | 2.794198  | 3.496160  | 0.147631  |
| 42 | 1 | 0 | 3.814037  | 3.833483  | -0.043626 |
| 43 | 1 | 0 | 2.118500  | 4.264012  | -0.230422 |
| 44 | 1 | 0 | 2.653957  | 3.411083  | 1.227265  |

### Structure 27c ( $^5\text{C}_2$ ax-ec) (M06-2X, Gas Phase)

Energy (Hartrees): = - 1016.1528944  
No imaginary frequencies

Standard orientation:

| Center<br>Number | Atomic<br>Number | Atomic<br>Type | Coordinates (Angstroms) |           |           |
|------------------|------------------|----------------|-------------------------|-----------|-----------|
|                  |                  |                | X                       | Y         | Z         |
| 1                | 6                | 0              | 1.156150                | 1.669723  | 0.158138  |
| 2                | 6                | 0              | -0.074398               | 2.255221  | 0.866869  |
| 3                | 6                | 0              | 1.182016                | 0.163126  | 0.424796  |
| 4                | 1                | 0              | -0.167015               | 3.316053  | 0.631224  |
| 5                | 1                | 0              | 0.062629                | 2.163960  | 1.951054  |
| 6                | 1                | 0              | 2.071749                | 2.124953  | 0.533985  |
| 7                | 1                | 0              | 1.268838                | -0.023379 | 1.506240  |
| 8                | 8                | 0              | -0.063826               | -0.382006 | -0.028180 |
| 9                | 7                | 0              | -1.323202               | 1.572892  | 0.505499  |
| 10               | 6                | 0              | 2.269411                | -0.632420 | -0.295915 |
| 11               | 1                | 0              | 2.324730                | -0.290163 | -1.337580 |
| 12               | 6                | 0              | 3.638495                | -0.467135 | 0.346076  |
| 13               | 1                | 0              | 3.574387                | -0.791438 | 1.395314  |
| 14               | 6                | 0              | 4.672606                | -1.332532 | -0.352812 |
| 15               | 1                | 0              | 4.676777                | -1.083562 | -1.421435 |
| 16               | 1                | 0              | 4.428275                | -2.388846 | -0.220874 |
| 17               | 8                | 0              | 1.972078                | -2.013975 | -0.226823 |
| 18               | 1                | 0              | 1.016807                | -2.092228 | -0.323863 |
| 19               | 8                | 0              | 4.020581                | 0.889501  | 0.265418  |
| 20               | 1                | 0              | 4.969720                | 0.903087  | 0.433193  |
| 21               | 8                | 0              | 5.917002                | -0.994114 | 0.250601  |
| 22               | 1                | 0              | 6.627176                | -1.393318 | -0.254120 |
| 23               | 8                | 0              | 1.115436                | 1.925017  | -1.235035 |
| 24               | 1                | 0              | 0.456879                | 1.331925  | -1.611860 |
| 25               | 6                | 0              | -1.881156               | 1.955559  | -0.805931 |
| 26               | 1                | 0              | -1.703767               | 1.170316  | -1.553984 |
| 27               | 1                | 0              | -1.339750               | 2.836372  | -1.154458 |
| 28               | 6                | 0              | -2.405085               | -0.638721 | 0.397527  |
| 29               | 6                | 0              | -2.514966               | -1.383555 | -0.771552 |
| 30               | 6                | 0              | -3.477570               | -0.589765 | 1.285764  |
| 31               | 6                | 0              | -3.697030               | -2.059935 | -1.059489 |
| 32               | 1                | 0              | -1.673554               | -1.430253 | -1.452043 |
| 33               | 6                | 0              | -4.654405               | -1.269642 | 1.002442  |
| 34               | 1                | 0              | -3.389964               | 0.001957  | 2.191121  |
| 35               | 6                | 0              | -4.767794               | -2.003040 | -0.175973 |
| 36               | 1                | 0              | -3.778107               | -2.634136 | -1.974779 |
| 37               | 1                | 0              | -5.484295               | -1.226690 | 1.697649  |
| 38               | 1                | 0              | -5.686325               | -2.532014 | -0.400092 |
| 39               | 6                | 0              | -1.162434               | 0.153714  | 0.720169  |
| 40               | 1                | 0              | -0.921957               | 0.019650  | 1.784688  |
| 41               | 6                | 0              | -3.371892               | 2.270298  | -0.739439 |
| 42               | 1                | 0              | -3.719467               | 2.652720  | -1.702409 |
| 43               | 1                | 0              | -3.958233               | 1.385014  | -0.491224 |
| 44               | 1                | 0              | -3.554976               | 3.029017  | 0.023874  |

### Structure 27c ( $^5\text{C}_2$ ec-ec) (M06-2X, Benzene)

Energy (Hartrees): = - 1016.1763356  
No imaginary frequencies

Standard orientation:

| Center | Atomic | Atomic | Coordinates (Angstroms) |  |  |
|--------|--------|--------|-------------------------|--|--|
|--------|--------|--------|-------------------------|--|--|

| Number | Number | Type | X         | Y         | Z         |
|--------|--------|------|-----------|-----------|-----------|
| 1      | 6      | 0    | -1.079903 | 1.601133  | 0.185624  |
| 2      | 6      | 0    | 0.147849  | 2.274077  | -0.420277 |
| 3      | 6      | 0    | -1.158138 | 0.176475  | -0.362111 |
| 4      | 1      | 0    | 0.239780  | 3.270073  | 0.011574  |
| 5      | 1      | 0    | 0.033800  | 2.373258  | -1.514403 |
| 6      | 1      | 0    | -1.986494 | 2.146678  | -0.068072 |
| 7      | 1      | 0    | -1.269015 | 0.198887  | -1.457309 |
| 8      | 8      | 0    | 0.070671  | -0.476790 | -0.036425 |
| 9      | 7      | 0    | 1.343094  | 1.495115  | -0.077847 |
| 10     | 6      | 0    | -2.254617 | -0.699807 | 0.244026  |
| 11     | 1      | 0    | -2.288334 | -0.503637 | 1.323160  |
| 12     | 6      | 0    | -3.623136 | -0.431310 | -0.363551 |
| 13     | 1      | 0    | -3.576816 | -0.670923 | -1.435940 |
| 14     | 6      | 0    | -4.685117 | -1.307936 | 0.274284  |
| 15     | 1      | 0    | -4.686043 | -1.134340 | 1.357519  |
| 16     | 1      | 0    | -4.476598 | -2.361056 | 0.071065  |
| 17     | 8      | 0    | -1.983670 | -2.065740 | -0.015628 |
| 18     | 1      | 0    | -1.035370 | -2.181025 | 0.111889  |
| 19     | 8      | 0    | -3.956927 | 0.930213  | -0.174516 |
| 20     | 1      | 0    | -4.906364 | 0.987283  | -0.333655 |
| 21     | 8      | 0    | -5.919807 | -0.894436 | -0.304173 |
| 22     | 1      | 0    | -6.640209 | -1.286978 | 0.193978  |
| 23     | 8      | 0    | -0.969215 | 1.593467  | 1.595542  |
| 24     | 1      | 0    | -0.077146 | 1.273653  | 1.779515  |
| 25     | 6      | 0    | 2.568757  | 2.148325  | -0.549621 |
| 26     | 1      | 0    | 2.548437  | 2.264065  | -1.647733 |
| 27     | 1      | 0    | 3.407237  | 1.493488  | -0.310710 |
| 28     | 6      | 0    | 2.390777  | -0.735190 | -0.261366 |
| 29     | 6      | 0    | 2.733064  | -0.925978 | 1.077244  |
| 30     | 6      | 0    | 3.126775  | -1.366953 | -1.256917 |
| 31     | 6      | 0    | 3.806938  | -1.739066 | 1.412321  |
| 32     | 1      | 0    | 2.155092  | -0.428306 | 1.847640  |
| 33     | 6      | 0    | 4.205101  | -2.182616 | -0.921772 |
| 34     | 1      | 0    | 2.857661  | -1.221246 | -2.297983 |
| 35     | 6      | 0    | 4.545798  | -2.368599 | 0.412090  |
| 36     | 1      | 0    | 4.070356  | -1.884767 | 2.453464  |
| 37     | 1      | 0    | 4.774973  | -2.672128 | -1.702885 |
| 38     | 1      | 0    | 5.385029  | -3.001933 | 0.675231  |
| 39     | 6      | 0    | 1.209502  | 0.137769  | -0.607523 |
| 40     | 1      | 0    | 1.076883  | 0.167811  | -1.707242 |
| 41     | 6      | 0    | 2.804680  | 3.500867  | 0.110155  |
| 42     | 1      | 0    | 3.822698  | 3.836324  | -0.096700 |
| 43     | 1      | 0    | 2.126147  | 4.273320  | -0.254277 |
| 44     | 1      | 0    | 2.684240  | 3.414850  | 1.192781  |

### Structure 27c ( $^5C_2$ ax-ec) (M06-2X, Benzene)

Energy (Hartrees): = - 1016.173418  
 No imaginary frequencies

Standard orientation:

| Center Number | Atomic Number | Atomic Type | Coordinates (Angstroms) |           |           |
|---------------|---------------|-------------|-------------------------|-----------|-----------|
|               |               |             | X                       | Y         | Z         |
| 1             | 6             | 0           | 1.156292                | 1.668766  | 0.173083  |
| 2             | 6             | 0           | -0.075491               | 2.249572  | 0.882796  |
| 3             | 6             | 0           | 1.179888                | 0.160273  | 0.425804  |
| 4             | 1             | 0           | -0.166676               | 3.312919  | 0.657631  |
| 5             | 1             | 0           | 0.060663                | 2.146096  | 1.965720  |
| 6             | 1             | 0           | 2.069141                | 2.120585  | 0.559808  |
| 7             | 1             | 0           | 1.262545                | -0.032699 | 1.506003  |
| 8             | 8             | 0           | -0.065394               | -0.380066 | -0.035553 |
| 9             | 7             | 0           | -1.324194               | 1.570974  | 0.512038  |
| 10            | 6             | 0           | 2.268109                | -0.634580 | -0.294928 |
| 11            | 1             | 0           | 2.318396                | -0.304182 | -1.340556 |
| 12            | 6             | 0           | 3.640714                | -0.460119 | 0.338302  |
| 13            | 1             | 0           | 3.578996                | -0.748711 | 1.398192  |
| 14            | 6             | 0           | 4.670647                | -1.350199 | -0.335241 |
| 15            | 1             | 0           | 4.676385                | -1.139389 | -1.411927 |
| 16            | 1             | 0           | 4.429375                | -2.402407 | -0.168681 |
| 17            | 8             | 0           | 1.970750                | -2.017214 | -0.213859 |
| 18            | 1             | 0           | 1.015385                | -2.093983 | -0.316288 |
| 19            | 8             | 0           | 4.031885                | 0.892353  | 0.213357  |
| 20            | 1             | 0           | 4.982866                | 0.901289  | 0.374059  |
| 21            | 8             | 0           | 5.918547                | -0.997637 | 0.254756  |
| 22            | 1             | 0           | 6.625661                | -1.397673 | -0.256304 |
| 23            | 8             | 0           | 1.124931                | 1.938924  | -1.219320 |
| 24            | 1             | 0           | 0.460722                | 1.357006  | -1.604848 |
| 25            | 6             | 0           | -1.879500               | 1.966057  | -0.797069 |
| 26            | 1             | 0           | -1.704281               | 1.187733  | -1.552381 |
| 27            | 1             | 0           | -1.337903               | 2.849986  | -1.137194 |
| 28            | 6             | 0           | -2.407426               | -0.642082 | 0.391293  |
| 29            | 6             | 0           | -2.525420               | -1.368330 | -0.789406 |

|    |   |   |           |           |           |
|----|---|---|-----------|-----------|-----------|
| 30 | 6 | 0 | -3.474460 | -0.608446 | 1.287664  |
| 31 | 6 | 0 | -3.707635 | -2.045215 | -1.077552 |
| 32 | 1 | 0 | -1.690931 | -1.403449 | -1.479424 |
| 33 | 6 | 0 | -4.651559 | -1.288505 | 1.003526  |
| 34 | 1 | 0 | -3.381690 | -0.033775 | 2.203720  |
| 35 | 6 | 0 | -4.772123 | -2.004798 | -0.184897 |
| 36 | 1 | 0 | -3.794400 | -2.605407 | -2.001339 |
| 37 | 1 | 0 | -5.475725 | -1.259147 | 1.706722  |
| 38 | 1 | 0 | -5.690358 | -2.534823 | -0.409317 |
| 39 | 6 | 0 | -1.164537 | 0.149338  | 0.717922  |
| 40 | 1 | 0 | -0.923361 | 0.009773  | 1.780944  |
| 41 | 6 | 0 | -3.368190 | 2.285586  | -0.727745 |
| 42 | 1 | 0 | -3.716738 | 2.670076  | -1.690174 |
| 43 | 1 | 0 | -3.959768 | 1.402922  | -0.480449 |
| 44 | 1 | 0 | -3.550557 | 3.045652  | 0.035448  |

-----

**Structure 27c (<sup>5</sup>C<sub>2</sub> ec-ec) (M06-2X, DMSO)**

Energy (Hartrees): = - 1016.1797947  
 No imaginary frequencies

Standard orientation:

| Center<br>Number | Atomic<br>Number | Atomic<br>Type | Coordinates (Angstroms) |           |           |
|------------------|------------------|----------------|-------------------------|-----------|-----------|
|                  |                  |                | X                       | Y         | Z         |
| 1                | 6                | 0              | -1.075808               | 1.597557  | 0.170875  |
| 2                | 6                | 0              | 0.153602                | 2.271362  | -0.427850 |
| 3                | 6                | 0              | -1.150100               | 0.176858  | -0.381323 |
| 4                | 1                | 0              | 0.242906                | 3.269769  | -0.000717 |
| 5                | 1                | 0              | 0.043781                | 2.363830  | -1.521791 |
| 6                | 1                | 0              | -1.978370               | 2.146876  | -0.089658 |
| 7                | 1                | 0              | -1.247024               | 0.208309  | -1.476835 |
| 8                | 8                | 0              | 0.075147                | -0.480448 | -0.043932 |
| 9                | 7                | 0              | 1.350225                | 1.495088  | -0.077752 |
| 10               | 6                | 0              | -2.249576               | -0.710025 | 0.197077  |
| 11               | 1                | 0              | -2.253649               | -0.591208 | 1.287849  |
| 12               | 6                | 0              | -3.632401               | -0.373786 | -0.340654 |
| 13               | 1                | 0              | -3.607572               | -0.426221 | -1.439044 |
| 14               | 6                | 0              | -4.669907               | -1.361237 | 0.164531  |
| 15               | 1                | 0              | -4.636751               | -1.386960 | 1.260615  |
| 16               | 1                | 0              | -4.468356               | -2.360051 | -0.228700 |
| 17               | 8                | 0              | -2.003489               | -2.060545 | -0.163432 |
| 18               | 1                | 0              | -1.053304               | -2.190817 | -0.064112 |
| 19               | 8                | 0              | -3.984048               | 0.931698  | 0.082519  |
| 20               | 1                | 0              | -4.940645               | 0.986023  | -0.033961 |
| 21               | 8                | 0              | -5.926267               | -0.866633 | -0.291681 |
| 22               | 1                | 0              | -6.623992               | -1.332007 | 0.179132  |
| 23               | 8                | 0              | -0.975902               | 1.586023  | 1.584811  |
| 24               | 1                | 0              | -0.087205               | 1.256349  | 1.771637  |
| 25               | 6                | 0              | 2.570058                | 2.145559  | -0.574309 |
| 26               | 1                | 0              | 2.536112                | 2.237034  | -1.673389 |
| 27               | 1                | 0              | 3.415328                | 1.500548  | -0.330405 |
| 28               | 6                | 0              | 2.397272                | -0.734405 | -0.244268 |
| 29               | 6                | 0              | 2.714740                | -0.933004 | 1.100216  |
| 30               | 6                | 0              | 3.154056                | -1.357547 | -1.230611 |
| 31               | 6                | 0              | 3.782866                | -1.748953 | 1.450748  |
| 32               | 1                | 0              | 2.122403                | -0.443430 | 1.865704  |
| 33               | 6                | 0              | 4.226937                | -2.175433 | -0.879909 |
| 34               | 1                | 0              | 2.906102                | -1.201289 | -2.275585 |
| 35               | 6                | 0              | 4.541694                | -2.371633 | 0.460000  |
| 36               | 1                | 0              | 4.026284                | -1.901821 | 2.496081  |
| 37               | 1                | 0              | 4.813493                | -2.657682 | -1.653510 |
| 38               | 1                | 0              | 5.376264                | -3.006552 | 0.734930  |
| 39               | 6                | 0              | 1.219624                | 0.136391  | -0.608090 |
| 40               | 1                | 0              | 1.098064                | 0.165276  | -1.707173 |
| 41               | 6                | 0              | 2.806746                | 3.512663  | 0.052885  |
| 42               | 1                | 0              | 3.816455                | 3.851804  | -0.187222 |
| 43               | 1                | 0              | 2.110498                | 4.269009  | -0.312266 |
| 44               | 1                | 0              | 2.715263                | 3.450613  | 1.140509  |

-----

**Structure 27c (<sup>5</sup>C<sub>2</sub> ax-ec) (M06-2X, DMSO)**

Energy (Hartrees): = - 1016.177145  
 No imaginary frequencies

Standard orientation:

| Center<br>Number | Atomic<br>Number | Atomic<br>Type | Coordinates (Angstroms) |          |          |
|------------------|------------------|----------------|-------------------------|----------|----------|
|                  |                  |                | X                       | Y        | Z        |
| 1                | 6                | 0              | 1.157164                | 1.666716 | 0.197866 |
| 2                | 6                | 0              | -0.075606               | 2.240789 | 0.909488 |
| 3                | 6                | 0              | 1.178530                | 0.156506 | 0.433144 |
| 4                | 1                | 0              | -0.166511               | 3.306843 | 0.696280 |

|    |   |   |           |           |           |
|----|---|---|-----------|-----------|-----------|
| 5  | 1 | 0 | 0.062189  | 2.120625  | 1.989891  |
| 6  | 1 | 0 | 2.065404  | 2.112857  | 0.601800  |
| 7  | 1 | 0 | 1.262087  | -0.043447 | 1.511254  |
| 8  | 8 | 0 | -0.067780 | -0.379247 | -0.032744 |
| 9  | 7 | 0 | -1.327144 | 1.567132  | 0.531050  |
| 10 | 6 | 0 | 2.264383  | -0.633369 | -0.295867 |
| 11 | 1 | 0 | 2.306345  | -0.309073 | -1.343472 |
| 12 | 6 | 0 | 3.641455  | -0.453592 | 0.326142  |
| 13 | 1 | 0 | 3.580821  | -0.704629 | 1.395385  |
| 14 | 6 | 0 | 4.663704  | -1.369820 | -0.323710 |
| 15 | 1 | 0 | 4.669099  | -1.193918 | -1.406256 |
| 16 | 1 | 0 | 4.420532  | -2.415927 | -0.125325 |
| 17 | 8 | 0 | 1.966349  | -2.017850 | -0.211366 |
| 18 | 1 | 0 | 1.011238  | -2.090143 | -0.324827 |
| 19 | 8 | 0 | 4.047000  | 0.892924  | 0.157875  |
| 20 | 1 | 0 | 4.999963  | 0.890359  | 0.311407  |
| 21 | 8 | 0 | 5.917046  | -1.009750 | 0.251865  |
| 22 | 1 | 0 | 6.618111  | -1.403241 | -0.275814 |
| 23 | 8 | 0 | 1.141063  | 1.960066  | -1.192470 |
| 24 | 1 | 0 | 0.477584  | 1.387950  | -1.595771 |
| 25 | 6 | 0 | -1.862771 | 1.963030  | -0.787418 |
| 26 | 1 | 0 | -1.652464 | 1.199657  | -1.548990 |
| 27 | 1 | 0 | -1.336848 | 2.865075  | -1.102903 |
| 28 | 6 | 0 | -2.408409 | -0.643879 | 0.393492  |
| 29 | 6 | 0 | -2.542318 | -1.330936 | -0.809827 |
| 30 | 6 | 0 | -3.463860 | -0.638041 | 1.304840  |
| 31 | 6 | 0 | -3.732341 | -1.991436 | -1.107330 |
| 32 | 1 | 0 | -1.717866 | -1.346131 | -1.512917 |
| 33 | 6 | 0 | -4.649285 | -1.300939 | 1.010742  |
| 34 | 1 | 0 | -3.354807 | -0.102389 | 2.242892  |
| 35 | 6 | 0 | -4.787448 | -1.975442 | -0.200993 |
| 36 | 1 | 0 | -3.833211 | -2.520244 | -2.048352 |
| 37 | 1 | 0 | -5.464955 | -1.292911 | 1.724760  |
| 38 | 1 | 0 | -5.711690 | -2.492190 | -0.432966 |
| 39 | 6 | 0 | -1.164258 | 0.141307  | 0.728314  |
| 40 | 1 | 0 | -0.924173 | -0.005058 | 1.789835  |
| 41 | 6 | 0 | -3.359159 | 2.251971  | -0.749314 |
| 42 | 1 | 0 | -3.693022 | 2.632761  | -1.718432 |
| 43 | 1 | 0 | -3.941914 | 1.358414  | -0.517235 |
| 44 | 1 | 0 | -3.574030 | 3.008490  | 0.009722  |

### Structure 27d ( $^5C_2$ ec-ax) (M06-2X, Gas Phase)

Energy (Hartrees): = - 1016.1522064  
No imaginary frequencies

Standard orientation:

| Center Number | Atomic Number | Atomic Type | Coordinates (Angstroms) |           |           |
|---------------|---------------|-------------|-------------------------|-----------|-----------|
|               |               |             | X                       | Y         | Z         |
| 1             | 6             | 0           | 0.432806                | 1.513196  | 0.770268  |
| 2             | 6             | 0           | -1.045507               | 1.486189  | 1.171289  |
| 3             | 6             | 0           | 0.710070                | 0.277751  | -0.094932 |
| 4             | 1             | 0           | -1.279948               | 2.405847  | 1.710592  |
| 5             | 1             | 0           | -1.257965               | 0.628279  | 1.828448  |
| 6             | 1             | 0           | 1.083923                | 1.501723  | 1.642171  |
| 7             | 1             | 0           | 0.509579                | -0.633337 | 0.485655  |
| 8             | 8             | 0           | -0.166747               | 0.316098  | -1.231195 |
| 9             | 7             | 0           | -1.820915               | 1.454569  | -0.060307 |
| 10            | 6             | 0           | 2.120286                | 0.205769  | -0.683714 |
| 11            | 1             | 0           | 2.417121                | 1.218150  | -0.985771 |
| 12            | 6             | 0           | 3.133372                | -0.345947 | 0.306310  |
| 13            | 1             | 0           | 2.836747                | -1.372280 | 0.567238  |
| 14            | 6             | 0           | 4.522705                | -0.393416 | -0.303168 |
| 15            | 1             | 0           | 4.792302                | 0.614094  | -0.643754 |
| 16            | 1             | 0           | 4.536916                | -1.085334 | -1.148557 |
| 17            | 8             | 0           | 2.145003                | -0.683293 | -1.787510 |
| 18            | 1             | 0           | 1.369788                | -0.470236 | -2.317592 |
| 19            | 8             | 0           | 3.145967                | 0.474838  | 1.456027  |
| 20            | 1             | 0           | 3.953204                | 0.244818  | 1.929833  |
| 21            | 8             | 0           | 5.383977                | -0.818875 | 0.748183  |
| 22            | 1             | 0           | 6.293897                | -0.717326 | 0.465187  |
| 23            | 8             | 0           | 0.702398                | 2.697871  | 0.051727  |
| 24            | 1             | 0           | 0.031245                | 2.726675  | -0.641948 |
| 25            | 6             | 0           | -3.163576               | 2.014959  | -0.033452 |
| 26            | 1             | 0           | -3.654763               | 1.817208  | 0.929853  |
| 27            | 1             | 0           | -3.766408               | 1.513852  | -0.796946 |
| 28            | 6             | 0           | -1.930142               | -1.068295 | -0.314901 |
| 29            | 6             | 0           | -2.985171               | -1.206962 | 0.583612  |
| 30            | 6             | 0           | -1.259523               | -2.212890 | -0.749486 |
| 31            | 6             | 0           | -3.369867               | -2.465914 | 1.035828  |
| 32            | 1             | 0           | -3.509301               | -0.329862 | 0.942540  |
| 33            | 6             | 0           | -1.640828               | -3.469580 | -0.296809 |
| 34            | 1             | 0           | -0.415726               | -2.108831 | -1.422322 |
| 35            | 6             | 0           | -2.700639               | -3.600500 | 0.595071  |

|    |   |   |           |           |           |
|----|---|---|-----------|-----------|-----------|
| 36 | 1 | 0 | -4.190121 | -2.557299 | 1.737970  |
| 37 | 1 | 0 | -1.105184 | -4.348114 | -0.636638 |
| 38 | 1 | 0 | -2.997576 | -4.580300 | 0.949297  |
| 39 | 6 | 0 | -1.541321 | 0.301670  | -0.884700 |
| 40 | 1 | 0 | -2.071999 | 0.440714  | -1.831279 |
| 41 | 6 | 0 | -3.138888 | 3.518400  | -0.294296 |
| 42 | 1 | 0 | -4.139333 | 3.950049  | -0.215656 |
| 43 | 1 | 0 | -2.491042 | 4.021209  | 0.427436  |
| 44 | 1 | 0 | -2.746399 | 3.718623  | -1.292991 |

### Structure 27d ( $^5C_2$ ax-ax) (M06-2X, Gas Phase)

Energy (Hartrees): = - 1016.1559038  
No imaginary frequencies

Standard orientation:

| Center<br>Number | Atomic<br>Number | Atomic<br>Type | Coordinates (Angstroms) |           |           |
|------------------|------------------|----------------|-------------------------|-----------|-----------|
|                  |                  |                | X                       | Y         | Z         |
| 1                | 6                | 0              | -0.480594               | 1.470164  | -0.959270 |
| 2                | 6                | 0              | 0.978872                | 1.402803  | -1.422268 |
| 3                | 6                | 0              | -0.702311               | 0.315589  | 0.016636  |
| 4                | 1                | 0              | 1.202608                | 2.247987  | -2.074241 |
| 5                | 1                | 0              | 1.130156                | 0.481648  | -1.996948 |
| 6                | 1                | 0              | -1.161169               | 1.373170  | -1.803951 |
| 7                | 1                | 0              | -0.502944               | -0.636073 | -0.492336 |
| 8                | 8                | 0              | 0.229648                | 0.483213  | 1.097629  |
| 9                | 7                | 0              | 1.927588                | 1.410036  | -0.304652 |
| 10               | 6                | 0              | -2.081879               | 0.248480  | 0.675967  |
| 11               | 1                | 0              | -2.410959               | 1.268564  | 0.914957  |
| 12               | 6                | 0              | -3.116728               | -0.408777 | -0.222549 |
| 13               | 1                | 0              | -2.792054               | -1.440031 | -0.424604 |
| 14               | 6                | 0              | -4.475768               | -0.461822 | 0.451615  |
| 15               | 1                | 0              | -4.769757               | 0.557379  | 0.732472  |
| 16               | 1                | 0              | -4.427748               | -1.091153 | 1.343436  |
| 17               | 8                | 0              | -2.021966               | -0.551496 | 1.843861  |
| 18               | 1                | 0              | -1.217023               | -0.291605 | 2.304767  |
| 19               | 8                | 0              | -3.209432               | 0.328638  | -1.423461 |
| 20               | 1                | 0              | -4.023518               | 0.034613  | -1.847330 |
| 21               | 8                | 0              | -5.362107               | -0.992503 | -0.527786 |
| 22               | 1                | 0              | -6.262738               | -0.912175 | -0.209994 |
| 23               | 8                | 0              | -0.761075               | 2.714331  | -0.340352 |
| 24               | 1                | 0              | -0.382783               | 2.676002  | 0.544171  |
| 25               | 6                | 0              | 2.231713                | 2.718311  | 0.285153  |
| 26               | 1                | 0              | 1.608758                | 2.919253  | 1.169978  |
| 27               | 1                | 0              | 1.983465                | 3.489156  | -0.445925 |
| 28               | 6                | 0              | 1.964835                | -1.003169 | 0.227605  |
| 29               | 6                | 0              | 3.049482                | -1.205404 | -0.622250 |
| 30               | 6                | 0              | 1.272690                | -2.106311 | 0.727301  |
| 31               | 6                | 0              | 3.436834                | -2.494991 | -0.971331 |
| 32               | 1                | 0              | 3.577021                | -0.340533 | -1.007223 |
| 33               | 6                | 0              | 1.659496                | -3.394074 | 0.375749  |
| 34               | 1                | 0              | 0.414544                | -1.951670 | 1.372292  |
| 35               | 6                | 0              | 2.743734                | -3.591947 | -0.473030 |
| 36               | 1                | 0              | 4.279467                | -2.641991 | -1.636625 |
| 37               | 1                | 0              | 1.110467                | -4.243970 | 0.763435  |
| 38               | 1                | 0              | 3.043575                | -4.596353 | -0.747354 |
| 39               | 6                | 0              | 1.601154                | 0.407433  | 0.675970  |
| 40               | 1                | 0              | 2.162933                | 0.629653  | 1.586899  |
| 41               | 6                | 0              | 3.703933                | 2.811481  | 0.667833  |
| 42               | 1                | 0              | 3.927155                | 3.776221  | 1.128828  |
| 43               | 1                | 0              | 3.976081                | 2.027250  | 1.378982  |
| 44               | 1                | 0              | 4.328036                | 2.690341  | -0.219035 |

### Structure 27d ( $^5C_2$ ec-ax) (M06-2X, Benzene)

Energy (Hartrees): = - 1016.1726849  
No imaginary frequencies

Standard orientation:

| Center<br>Number | Atomic<br>Number | Atomic<br>Type | Coordinates (Angstroms) |           |           |
|------------------|------------------|----------------|-------------------------|-----------|-----------|
|                  |                  |                | X                       | Y         | Z         |
| 1                | 6                | 0              | 0.453432                | -1.509809 | -0.759129 |
| 2                | 6                | 0              | -1.024450               | -1.506695 | -1.161328 |
| 3                | 6                | 0              | 0.715651                | -0.260160 | 0.090109  |
| 4                | 1                | 0              | -1.248872               | -2.433887 | -1.692254 |
| 5                | 1                | 0              | -1.242740               | -0.658555 | -1.828520 |
| 6                | 1                | 0              | 1.103050                | -1.502637 | -1.632019 |
| 7                | 1                | 0              | 0.504340                | 0.640346  | -0.503114 |
| 8                | 8                | 0              | -0.160884               | -0.293531 | 1.226300  |
| 9                | 7                | 0              | -1.800299               | -1.471358 | 0.069676  |



|    |   |   |           |           |           |
|----|---|---|-----------|-----------|-----------|
| 10 | 6 | 0 | 2.123061  | -0.157667 | 0.680791  |
| 11 | 1 | 0 | 2.424090  | -1.152447 | 1.032320  |
| 12 | 6 | 0 | 3.145896  | 0.347865  | -0.324887 |
| 13 | 1 | 0 | 2.828389  | 1.340384  | -0.676236 |
| 14 | 6 | 0 | 4.518777  | 0.481935  | 0.309559  |
| 15 | 1 | 0 | 4.804986  | -0.482185 | 0.747959  |
| 16 | 1 | 0 | 4.502040  | 1.248047  | 1.088451  |
| 17 | 8 | 0 | 2.132689  | 0.780033  | 1.745734  |
| 18 | 1 | 0 | 1.349782  | 0.587335  | 2.273298  |
| 19 | 8 | 0 | 3.212058  | -0.561841 | -1.405797 |
| 20 | 1 | 0 | 4.032894  | -0.353460 | -1.867251 |
| 21 | 8 | 0 | 5.399018  | 0.833569  | -0.754238 |
| 22 | 1 | 0 | 6.303792  | 0.748092  | -0.445564 |
| 23 | 8 | 0 | 0.737658  | -2.682900 | -0.024091 |
| 24 | 1 | 0 | 0.052681  | -2.718080 | 0.656674  |
| 25 | 6 | 0 | -3.139211 | -2.045881 | 0.050552  |
| 26 | 1 | 0 | -3.632960 | -1.863671 | -0.913934 |
| 27 | 1 | 0 | -3.745079 | -1.542549 | 0.809991  |
| 28 | 6 | 0 | -1.950734 | 1.052997  | 0.299667  |
| 29 | 6 | 0 | -2.987937 | 1.164533  | -0.623697 |
| 30 | 6 | 0 | -1.326752 | 2.216002  | 0.755313  |
| 31 | 6 | 0 | -3.400137 | 2.414158  | -1.079196 |
| 32 | 1 | 0 | -3.475519 | 0.273960  | -1.000632 |
| 33 | 6 | 0 | -1.735897 | 3.463600  | 0.300751  |
| 34 | 1 | 0 | -0.498297 | 2.135783  | 1.450074  |
| 35 | 6 | 0 | -2.778539 | 3.566927  | -0.615347 |
| 36 | 1 | 0 | -4.205930 | 2.484421  | -1.800756 |
| 37 | 1 | 0 | -1.237509 | 4.356460  | 0.660157  |
| 38 | 1 | 0 | -3.098439 | 4.539476  | -0.970539 |
| 39 | 6 | 0 | -1.537860 | -0.305743 | 0.880702  |
| 40 | 1 | 0 | -2.064925 | -0.442344 | 1.829252  |
| 41 | 6 | 0 | -3.101297 | -3.544773 | 0.328660  |
| 42 | 1 | 0 | -4.100317 | -3.982788 | 0.260338  |
| 43 | 1 | 0 | -2.457371 | -4.054786 | -0.392241 |
| 44 | 1 | 0 | -2.704328 | -3.733786 | 1.328420  |

-----

**Structure 27d (<sup>5</sup>C<sub>2</sub> ax-ax) (M06-2X, Benece)**

Energy (Hartrees): = - 1016.1761347  
 No imaginary frequencies

Standard orientation:

| Center<br>Number | Atomic<br>Number | Atomic<br>Type | Coordinates (Angstroms) |           |           |
|------------------|------------------|----------------|-------------------------|-----------|-----------|
|                  |                  |                | X                       | Y         | Z         |
| 1                | 6                | 0              | 0.501491                | -1.463426 | -0.951597 |
| 2                | 6                | 0              | -0.959099               | -1.429247 | -1.413132 |
| 3                | 6                | 0              | 0.706478                | -0.294429 | 0.010550  |
| 4                | 1                | 0              | -1.169098               | -2.288227 | -2.051632 |
| 5                | 1                | 0              | -1.122652               | -0.520404 | -2.003772 |
| 6                | 1                | 0              | 1.175933                | -1.364669 | -1.800990 |
| 7                | 1                | 0              | 0.495131                | 0.648641  | -0.509956 |
| 8                | 8                | 0              | -0.223019               | -0.460839 | 1.093443  |
| 9                | 7                | 0              | -1.907202               | -1.434513 | -0.295432 |
| 10               | 6                | 0              | 2.083142                | -0.199268 | 0.672182  |
| 11               | 1                | 0              | 2.409676                | -1.206303 | 0.962693  |
| 12               | 6                | 0              | 3.131571                | 0.408801  | -0.246270 |
| 13               | 1                | 0              | 2.788389                | 1.405991  | -0.558496 |
| 14               | 6                | 0              | 4.464142                | 0.565712  | 0.464924  |
| 15               | 1                | 0              | 4.774651                | -0.407753 | 0.864580  |
| 16               | 1                | 0              | 4.374161                | 1.285422  | 1.281983  |
| 17               | 8                | 0              | 2.010481                | 0.652437  | 1.804192  |
| 18               | 1                | 0              | 1.204417                | 0.404358  | 2.270754  |
| 19               | 8                | 0              | 3.291176                | -0.434363 | -1.370119 |
| 20               | 1                | 0              | 4.120534                | -0.162745 | -1.780330 |
| 21               | 8                | 0              | 5.375836                | 1.015426  | -0.533083 |
| 22               | 1                | 0              | 6.268123                | 0.958104  | -0.183936 |
| 23               | 8                | 0              | 0.809265                | -2.696268 | -0.319876 |
| 24               | 1                | 0              | 0.418050                | -2.662088 | 0.559720  |
| 25               | 6                | 0              | -2.203484               | -2.740102 | 0.305774  |
| 26               | 1                | 0              | -1.565958               | -2.942237 | 1.179775  |
| 27               | 1                | 0              | -1.975911               | -3.512336 | -0.430698 |
| 28               | 6                | 0              | -1.989539               | 0.984174  | 0.212634  |
| 29               | 6                | 0              | -3.057613               | 1.159322  | -0.664668 |
| 30               | 6                | 0              | -1.343544               | 2.106327  | 0.732270  |
| 31               | 6                | 0              | -3.472452               | 2.438773  | -1.021442 |
| 32               | 1                | 0              | -3.553066               | 0.282778  | -1.065651 |
| 33               | 6                | 0              | -1.759239               | 3.384222  | 0.376289  |
| 34               | 1                | 0              | -0.498268               | 1.976598  | 1.398960  |
| 35               | 6                | 0              | -2.826268               | 3.554062  | -0.500496 |
| 36               | 1                | 0              | -4.300823               | 2.562890  | -1.709329 |
| 37               | 1                | 0              | -1.246760               | 4.248307  | 0.782994  |
| 38               | 1                | 0              | -3.148227               | 4.550600  | -0.779325 |
| 39               | 6                | 0              | -1.597405               | -0.416036 | 0.673443  |
| 40               | 1                | 0              | -2.152488               | -0.637693 | 1.588163  |

|    |   |   |           |           |           |
|----|---|---|-----------|-----------|-----------|
| 41 | 6 | 0 | -3.667406 | -2.830827 | 0.715996  |
| 42 | 1 | 0 | -3.882648 | -3.798962 | 1.174945  |
| 43 | 1 | 0 | -3.926509 | -2.052952 | 1.439391  |
| 44 | 1 | 0 | -4.310798 | -2.705223 | -0.157026 |

-----  
**Structure 27d (<sup>5</sup>C<sub>2</sub> ec-ax) (M06-2X, DMSO)**

Energy (Hartrees): = - 1016.1757923  
 No imaginary frequencies

Standard orientation:

| Center<br>Number | Atomic<br>Number | Atomic<br>Type | Coordinates (Angstroms) |           |           |
|------------------|------------------|----------------|-------------------------|-----------|-----------|
|                  |                  |                | X                       | Y         | Z         |
| 1                | 6                | 0              | 0.458063                | -1.495603 | -0.753485 |
| 2                | 6                | 0              | -1.020728               | -1.504644 | -1.148018 |
| 3                | 6                | 0              | 0.714755                | -0.243652 | 0.092768  |
| 4                | 1                | 0              | -1.243916               | -2.430074 | -1.682327 |
| 5                | 1                | 0              | -1.248659               | -0.655614 | -1.810007 |
| 6                | 1                | 0              | 1.101561                | -1.484375 | -1.630882 |
| 7                | 1                | 0              | 0.496969                | 0.651356  | -0.506389 |
| 8                | 8                | 0              | -0.156886               | -0.275492 | 1.232453  |
| 9                | 7                | 0              | -1.786327               | -1.480974 | 0.089864  |
| 10               | 6                | 0              | 2.120952                | -0.122088 | 0.679786  |
| 11               | 1                | 0              | 2.420290                | -1.100738 | 1.075544  |
| 12               | 6                | 0              | 3.153157                | 0.337433  | -0.338967 |
| 13               | 1                | 0              | 2.824281                | 1.298152  | -0.761343 |
| 14               | 6                | 0              | 4.512830                | 0.534246  | 0.308072  |
| 15               | 1                | 0              | 4.806229                | -0.392618 | 0.815838  |
| 16               | 1                | 0              | 4.475277                | 1.349105  | 1.034410  |
| 17               | 8                | 0              | 2.124114                | 0.858125  | 1.707898  |
| 18               | 1                | 0              | 1.324453                | 0.699851  | 2.223062  |
| 19               | 8                | 0              | 3.258381                | -0.639131 | -1.359768 |
| 20               | 1                | 0              | 4.091756                | -0.447531 | -1.807490 |
| 21               | 8                | 0              | 5.409441                | 0.829384  | -0.759706 |
| 22               | 1                | 0              | 6.309430                | 0.750315  | -0.429842 |
| 23               | 8                | 0              | 0.753121                | -2.668941 | -0.016887 |
| 24               | 1                | 0              | 0.044021                | -2.723297 | 0.639017  |
| 25               | 6                | 0              | -3.123903               | -2.063940 | 0.073361  |
| 26               | 1                | 0              | -3.625335               | -1.872108 | -0.884296 |
| 27               | 1                | 0              | -3.722921               | -1.575627 | 0.847260  |
| 28               | 6                | 0              | -1.966043               | 1.043102  | 0.301190  |
| 29               | 6                | 0              | -2.995809               | 1.134688  | -0.633741 |
| 30               | 6                | 0              | -1.362589               | 2.218454  | 0.755262  |
| 31               | 6                | 0              | -3.416936               | 2.376435  | -1.105046 |
| 32               | 1                | 0              | -3.472237               | 0.236983  | -1.008065 |
| 33               | 6                | 0              | -1.780479               | 3.458528  | 0.285234  |
| 34               | 1                | 0              | -0.545719               | 2.157456  | 1.465940  |
| 35               | 6                | 0              | -2.812072               | 3.541427  | -0.646697 |
| 36               | 1                | 0              | -4.216791               | 2.430593  | -1.835001 |
| 37               | 1                | 0              | -1.298426               | 4.360802  | 0.644389  |
| 38               | 1                | 0              | -3.138923               | 4.507133  | -1.015002 |
| 39               | 6                | 0              | -1.537490               | -0.306629 | 0.892234  |
| 40               | 1                | 0              | -2.061319               | -0.441332 | 1.842245  |
| 41               | 6                | 0              | -3.070323               | -3.565856 | 0.328932  |
| 42               | 1                | 0              | -4.067492               | -4.008936 | 0.263889  |
| 43               | 1                | 0              | -2.431970               | -4.058611 | -0.409416 |
| 44               | 1                | 0              | -2.661948               | -3.767037 | 1.322190  |

-----  
**Structure 27d (<sup>5</sup>C<sub>2</sub> ax-ax) (M06-2X, DMSO)**

Energy (Hartrees): = - 1016.1788941  
 No imaginary frequencies

Standard orientation:

| Center<br>Number | Atomic<br>Number | Atomic<br>Type | Coordinates (Angstroms) |           |           |
|------------------|------------------|----------------|-------------------------|-----------|-----------|
|                  |                  |                | X                       | Y         | Z         |
| 1                | 6                | 0              | 0.506236                | -1.459497 | -0.952195 |
| 2                | 6                | 0              | -0.954143               | -1.434964 | -1.412975 |
| 3                | 6                | 0              | 0.703533                | -0.289537 | 0.008845  |
| 4                | 1                | 0              | -1.160534               | -2.294538 | -2.052028 |
| 5                | 1                | 0              | -1.116203               | -0.526399 | -2.004616 |
| 6                | 1                | 0              | 1.174254                | -1.351381 | -1.805642 |
| 7                | 1                | 0              | 0.489665                | 0.649467  | -0.517952 |
| 8                | 8                | 0              | -0.226479               | -0.456484 | 1.090377  |
| 9                | 7                | 0              | -1.905637               | -1.442212 | -0.297665 |
| 10               | 6                | 0              | 2.077245                | -0.181304 | 0.673015  |
| 11               | 1                | 0              | 2.401741                | -1.179426 | 0.994053  |
| 12               | 6                | 0              | 3.133235                | 0.401797  | -0.253591 |
| 13               | 1                | 0              | 2.778558                | 1.375574  | -0.621578 |
| 14               | 6                | 0              | 4.451338                | 0.612465  | 0.470883  |

|    |   |   |           |           |           |
|----|---|---|-----------|-----------|-----------|
| 15 | 1 | 0 | 4.770597  | -0.335075 | 0.921464  |
| 16 | 1 | 0 | 4.342140  | 1.367592  | 1.252548  |
| 17 | 8 | 0 | 1.996164  | 0.698228  | 1.784874  |
| 18 | 1 | 0 | 1.183716  | 0.463124  | 2.248713  |
| 19 | 8 | 0 | 3.331761  | -0.490239 | -1.335897 |
| 20 | 1 | 0 | 4.173897  | -0.228289 | -1.727781 |
| 21 | 8 | 0 | 5.374929  | 1.030674  | -0.531045 |
| 22 | 1 | 0 | 6.264791  | 0.956821  | -0.173610 |
| 23 | 8 | 0 | 0.830532  | -2.692853 | -0.325762 |
| 24 | 1 | 0 | 0.430900  | -2.673493 | 0.551563  |
| 25 | 6 | 0 | -2.185902 | -2.750252 | 0.310359  |
| 26 | 1 | 0 | -1.534837 | -2.947042 | 1.174769  |
| 27 | 1 | 0 | -1.969833 | -3.520585 | -0.431659 |
| 28 | 6 | 0 | -2.000590 | 0.977030  | 0.207699  |
| 29 | 6 | 0 | -3.073101 | 1.149469  | -0.665969 |
| 30 | 6 | 0 | -1.355989 | 2.103394  | 0.721775  |
| 31 | 6 | 0 | -3.492398 | 2.427872  | -1.025002 |
| 32 | 1 | 0 | -3.572987 | 0.274390  | -1.064904 |
| 33 | 6 | 0 | -1.773717 | 3.380493  | 0.362286  |
| 34 | 1 | 0 | -0.511666 | 1.980135  | 1.390832  |
| 35 | 6 | 0 | -2.844616 | 3.546983  | -0.511824 |
| 36 | 1 | 0 | -4.324633 | 2.547929  | -1.709376 |
| 37 | 1 | 0 | -1.261146 | 4.246690  | 0.765158  |
| 38 | 1 | 0 | -3.168949 | 4.542296  | -0.793182 |
| 39 | 6 | 0 | -1.601198 | -0.420785 | 0.670847  |
| 40 | 1 | 0 | -2.156194 | -0.642995 | 1.585159  |
| 41 | 6 | 0 | -3.642259 | -2.847543 | 0.743176  |
| 42 | 1 | 0 | -3.841404 | -3.816468 | 1.208008  |
| 43 | 1 | 0 | -3.892344 | -2.069317 | 1.469602  |
| 44 | 1 | 0 | -4.301379 | -2.731861 | -0.120243 |

### Structure 31a (<sup>2</sup>E ec-ax H-bond O) (M06-2X, Gas Phase)

Energy (Hartrees): = - 1130.6614413

No imaginary frequencies

Standard orientation:

| Center Number | Atomic Number | Atomic Type | Coordinates (Angstroms) |           |           |
|---------------|---------------|-------------|-------------------------|-----------|-----------|
|               |               |             | X                       | Y         | Z         |
| 1             | 6             | 0           | -2.207223               | 0.187512  | 0.664005  |
| 2             | 6             | 0           | -2.225059               | -1.104987 | 0.131561  |
| 3             | 6             | 0           | -3.408351               | -1.680200 | -0.292779 |
| 4             | 6             | 0           | -4.611554               | -0.976262 | -0.186078 |
| 5             | 6             | 0           | -4.614477               | 0.304931  | 0.360509  |
| 6             | 6             | 0           | -3.411144               | 0.868215  | 0.781290  |
| 7             | 1             | 0           | -1.302749               | -1.671483 | 0.077887  |
| 8             | 1             | 0           | -3.439149               | -2.682801 | -0.700850 |
| 9             | 1             | 0           | -5.532823               | 0.864689  | 0.472389  |
| 10            | 1             | 0           | -3.422991               | 1.863060  | 1.216793  |
| 11            | 6             | 0           | -0.909477               | 0.862919  | 1.069040  |
| 12            | 1             | 0           | -1.112827               | 1.572036  | 1.879196  |
| 13            | 7             | 0           | -0.200825               | 1.565495  | -0.002646 |
| 14            | 8             | 0           | 0.027985                | -0.098767 | 1.518875  |
| 15            | 6             | 0           | 1.070487                | -0.273505 | 0.539894  |
| 16            | 6             | 0           | 0.594322                | 0.539762  | -0.660899 |
| 17            | 1             | 0           | 1.423822                | 0.978814  | -1.212447 |
| 18            | 1             | 0           | 0.008993                | -0.079346 | -1.359144 |
| 19            | 1             | 0           | 1.152007                | -1.341241 | 0.326777  |
| 20            | 6             | 0           | 2.374384                | 0.252825  | 1.153446  |
| 21            | 1             | 0           | 2.418777                | 1.341508  | 0.999588  |
| 22            | 6             | 0           | 3.657089                | -0.379592 | 0.618029  |
| 23            | 1             | 0           | 3.597108                | -1.464689 | 0.784586  |
| 24            | 6             | 0           | 3.915606                | -0.134348 | -0.865922 |
| 25            | 1             | 0           | 3.821987                | 0.936381  | -1.075119 |
| 26            | 6             | 0           | 5.306419                | -0.593584 | -1.270539 |
| 27            | 1             | 0           | 5.493360                | -0.287935 | -2.306154 |
| 28            | 1             | 0           | 6.049448                | -0.153135 | -0.603114 |
| 29            | 8             | 0           | 2.407698                | -0.035322 | 2.542043  |
| 30            | 1             | 0           | 1.503097                | 0.062696  | 2.860609  |
| 31            | 8             | 0           | 4.749948                | 0.168680  | 1.330428  |
| 32            | 1             | 0           | 4.489624                | 0.162638  | 2.258379  |
| 33            | 8             | 0           | 2.950238                | -0.812839 | -1.652793 |
| 34            | 1             | 0           | 3.266762                | -1.722021 | -1.719878 |
| 35            | 8             | 0           | 5.280060                | -2.013979 | -1.167238 |
| 36            | 1             | 0           | 6.142170                | -2.362752 | -1.397423 |
| 37            | 6             | 0           | -1.021941               | 2.386470  | -0.877559 |
| 38            | 1             | 0           | -1.695782               | 1.770064  | -1.494518 |
| 39            | 1             | 0           | -1.657114               | 3.012724  | -0.242894 |
| 40            | 6             | 0           | -0.165489               | 3.277508  | -1.767650 |
| 41            | 1             | 0           | -0.796722               | 3.955021  | -2.345392 |
| 42            | 1             | 0           | 0.520530                | 3.869036  | -1.158565 |
| 43            | 1             | 0           | 0.421519                | 2.688760  | -2.475264 |
| 44            | 8             | 0           | -5.717751               | -1.627539 | -0.626759 |
| 45            | 6             | 0           | -6.955825               | -0.956784 | -0.528201 |

|    |   |   |           |           |           |
|----|---|---|-----------|-----------|-----------|
| 46 | 1 | 0 | -6.955085 | -0.033585 | -1.116853 |
| 47 | 1 | 0 | -7.700873 | -1.640150 | -0.928943 |
| 48 | 1 | 0 | -7.199330 | -0.723913 | 0.513534  |

-----  
**Structure 31a (<sup>2</sup>E ec-ax H-bond N) (M06-2X, Gas Phase)**

Energy (Hartrees): = - 1130.6646128  
 No imaginary frequencies

Standard orientation:

| Center<br>Number | Atomic<br>Number | Atomic<br>Type | Coordinates (Angstroms) |           |           |
|------------------|------------------|----------------|-------------------------|-----------|-----------|
|                  |                  |                | X                       | Y         | Z         |
| 1                | 6                | 0              | 1.745534                | -0.105560 | -0.417822 |
| 2                | 6                | 0              | 1.950610                | -0.861450 | 0.739903  |
| 3                | 6                | 0              | 3.202367                | -1.363422 | 1.044531  |
| 4                | 6                | 0              | 4.282859                | -1.128404 | 0.189087  |
| 5                | 6                | 0              | 4.089256                | -0.398799 | -0.982253 |
| 6                | 6                | 0              | 2.820867                | 0.099695  | -1.271720 |
| 7                | 1                | 0              | 1.109976                | -1.079146 | 1.388660  |
| 8                | 1                | 0              | 3.376689                | -1.954805 | 1.934814  |
| 9                | 1                | 0              | 4.900836                | -0.222059 | -1.674467 |
| 10               | 1                | 0              | 2.674217                | 0.655064  | -2.193351 |
| 11               | 6                | 0              | 0.396049                | 0.512322  | -0.730483 |
| 12               | 1                | 0              | 0.262174                | 0.561651  | -1.816863 |
| 13               | 7                | 0              | 0.184029                | 1.863109  | -0.177270 |
| 14               | 8                | 0              | -0.648772               | -0.247712 | -0.163702 |
| 15               | 6                | 0              | -1.230319               | 0.455710  | 0.948634  |
| 16               | 6                | 0              | -0.267011               | 1.616043  | 1.191559  |
| 17               | 1                | 0              | -0.778987               | 2.490869  | 1.593267  |
| 18               | 1                | 0              | 0.560397                | 1.333818  | 1.859168  |
| 19               | 1                | 0              | -1.289938               | -0.239718 | 1.783453  |
| 20               | 6                | 0              | -2.640752               | 0.939211  | 0.596003  |
| 21               | 1                | 0              | -3.166501               | 1.175878  | 1.530223  |
| 22               | 6                | 0              | -3.476744               | -0.080451 | -0.184113 |
| 23               | 1                | 0              | -2.915223               | -0.369236 | -1.080739 |
| 24               | 6                | 0              | -3.836564               | -1.339639 | 0.601591  |
| 25               | 1                | 0              | -4.431366               | -1.045174 | 1.471431  |
| 26               | 6                | 0              | -4.653670               | -2.290717 | -0.257679 |
| 27               | 1                | 0              | -4.973903               | -3.135054 | 0.362714  |
| 28               | 1                | 0              | -5.523479               | -1.766185 | -0.662511 |
| 29               | 8                | 0              | -2.624099               | 2.139047  | -0.173704 |
| 30               | 1                | 0              | -1.743944               | 2.221455  | -0.576814 |
| 31               | 8                | 0              | -4.704387               | 0.529752  | -0.540360 |
| 32               | 1                | 0              | -4.470118               | 1.410319  | -0.854929 |
| 33               | 8                | 0              | -2.687988               | -2.005713 | 1.089204  |
| 34               | 1                | 0              | -2.212736               | -2.326297 | 0.312637  |
| 35               | 8                | 0              | -3.778458               | -2.730523 | -1.290081 |
| 36               | 1                | 0              | -4.234549               | -3.378357 | -1.828509 |
| 37               | 6                | 0              | 1.285500                | 2.805222  | -0.325525 |
| 38               | 1                | 0              | 2.161195                | 2.487842  | 0.260226  |
| 39               | 1                | 0              | 1.584258                | 2.796895  | -1.378307 |
| 40               | 6                | 0              | 0.862288                | 4.212573  | 0.074282  |
| 41               | 1                | 0              | 1.656464                | 4.925338  | -0.153166 |
| 42               | 1                | 0              | -0.039099               | 4.507338  | -0.466768 |
| 43               | 1                | 0              | 0.656011                | 4.277313  | 1.144190  |
| 44               | 8                | 0              | 5.468821                | -1.660958 | 0.576057  |
| 45               | 6                | 0              | 6.585207                | -1.457929 | -0.264003 |
| 46               | 1                | 0              | 6.806283                | -0.391800 | -0.379016 |
| 47               | 1                | 0              | 7.422804                | -1.949858 | 0.224804  |
| 48               | 1                | 0              | 6.426528                | -1.905421 | -1.250522 |

-----  
**Structure 31a (<sup>2</sup>E ax-ax) (M06-2X, Gas Phase)**

Energy (Hartrees): = - 1130.6641488  
 No imaginary frequencies

Standard orientation:

| Center<br>Number | Atomic<br>Number | Atomic<br>Type | Coordinates (Angstroms) |           |           |
|------------------|------------------|----------------|-------------------------|-----------|-----------|
|                  |                  |                | X                       | Y         | Z         |
| 1                | 6                | 0              | -2.126645               | 0.573269  | 0.404948  |
| 2                | 6                | 0              | -2.331690               | -0.383130 | 1.401166  |
| 3                | 6                | 0              | -3.414533               | -1.242836 | 1.342014  |
| 4                | 6                | 0              | -4.321966               | -1.157744 | 0.283797  |
| 5                | 6                | 0              | -4.128438               | -0.205170 | -0.715871 |
| 6                | 6                | 0              | -3.030770               | 0.649194  | -0.646263 |
| 7                | 1                | 0              | -1.626086               | -0.451123 | 2.220646  |
| 8                | 1                | 0              | -3.583752               | -1.995044 | 2.102573  |
| 9                | 1                | 0              | -4.811539               | -0.121691 | -1.550048 |
| 10               | 1                | 0              | -2.861006               | 1.376781  | -1.431674 |
| 11               | 6                | 0              | -0.960142               | 1.541972  | 0.480386  |
| 12               | 1                | 0              | -1.275373               | 2.486857  | 0.929444  |

|    |   |   |           |           |           |
|----|---|---|-----------|-----------|-----------|
| 13 | 7 | 0 | -0.359971 | 1.761923  | -0.817394 |
| 14 | 8 | 0 | 0.082313  | 1.020875  | 1.311682  |
| 15 | 6 | 0 | 0.923519  | 0.206565  | 0.479881  |
| 16 | 6 | 0 | 0.482880  | 0.566923  | -0.962993 |
| 17 | 1 | 0 | 1.321009  | 0.764680  | -1.628527 |
| 18 | 1 | 0 | -0.100940 | -0.246713 | -1.391660 |
| 19 | 1 | 0 | 0.732968  | -0.846101 | 0.706181  |
| 20 | 6 | 0 | 2.369148  | 0.574248  | 0.824531  |
| 21 | 1 | 0 | 2.652707  | 1.483637  | 0.271327  |
| 22 | 6 | 0 | 3.409971  | -0.505361 | 0.539338  |
| 23 | 1 | 0 | 3.128961  | -1.405740 | 1.103713  |
| 24 | 6 | 0 | 3.546210  | -0.880901 | -0.933643 |
| 25 | 1 | 0 | 3.701722  | 0.028800  | -1.523026 |
| 26 | 6 | 0 | 4.721652  | -1.817598 | -1.156945 |
| 27 | 1 | 0 | 4.852644  | -1.969819 | -2.234210 |
| 28 | 1 | 0 | 5.626110  | -1.388505 | -0.720993 |
| 29 | 8 | 0 | 2.496278  | 0.812088  | 2.217872  |
| 30 | 1 | 0 | 1.697916  | 1.277934  | 2.490748  |
| 31 | 8 | 0 | 4.671814  | -0.028206 | 0.965604  |
| 32 | 1 | 0 | 4.528914  | 0.354277  | 1.838517  |
| 33 | 8 | 0 | 2.359050  | -1.497402 | -1.400328 |
| 34 | 1 | 0 | 2.413531  | -2.416487 | -1.110875 |
| 35 | 8 | 0 | 4.356344  | -3.038440 | -0.521362 |
| 36 | 1 | 0 | 5.069702  | -3.670647 | -0.619048 |
| 37 | 6 | 0 | 0.383139  | 3.029483  | -0.867291 |
| 38 | 1 | 0 | 0.944382  | 3.207283  | 0.062558  |
| 39 | 1 | 0 | 1.114685  | 2.949913  | -1.674394 |
| 40 | 6 | 0 | -0.551694 | 4.196275  | -1.153988 |
| 41 | 1 | 0 | 0.006363  | 5.133176  | -1.210170 |
| 42 | 1 | 0 | -1.066703 | 4.034581  | -2.102243 |
| 43 | 1 | 0 | -1.307931 | 4.306146  | -0.373151 |
| 44 | 8 | 0 | -5.351345 | -2.043392 | 0.312958  |
| 45 | 6 | 0 | -6.290814 | -1.988746 | -0.738511 |
| 46 | 1 | 0 | -5.816677 | -2.183284 | -1.706089 |
| 47 | 1 | 0 | -7.021073 | -2.767808 | -0.531798 |
| 48 | 1 | 0 | -6.795349 | -1.017397 | -0.770778 |

### Structure 31a (E<sub>2</sub> ec-ec) (M06-2X, Gas Phase)

Energy (Hartrees): = - 1130.6624364  
 No imaginary frequencies

Standard orientation:

| Center<br>Number | Atomic<br>Number | Atomic<br>Type | Coordinates (Angstroms) |           |           |
|------------------|------------------|----------------|-------------------------|-----------|-----------|
|                  |                  |                | X                       | Y         | Z         |
| 1                | 6                | 0              | 2.324288                | -0.082094 | -0.192409 |
| 2                | 6                | 0              | 2.773547                | 0.099004  | 1.119582  |
| 3                | 6                | 0              | 4.105978                | -0.068914 | 1.432595  |
| 4                | 6                | 0              | 5.023572                | -0.421819 | 0.434091  |
| 5                | 6                | 0              | 4.589504                | -0.601183 | -0.875658 |
| 6                | 6                | 0              | 3.235870                | -0.430336 | -1.173747 |
| 7                | 1                | 0              | 2.054943                | 0.378865  | 1.880816  |
| 8                | 1                | 0              | 4.477913                | 0.063373  | 2.440987  |
| 9                | 1                | 0              | 5.277909                | -0.871846 | -1.664151 |
| 10               | 1                | 0              | 2.896028                | -0.573618 | -2.194537 |
| 11               | 6                | 0              | 0.865652                | 0.103529  | -0.499397 |
| 12               | 1                | 0              | 0.688911                | -0.050843 | -1.584133 |
| 13               | 7                | 0              | 0.349591                | 1.388379  | -0.064473 |
| 14               | 8                | 0              | 0.090913                | -0.824826 | 0.239297  |
| 15               | 6                | 0              | -1.225279               | -0.273599 | 0.427360  |
| 16               | 6                | 0              | -1.095050               | 1.191251  | -0.018295 |
| 17               | 1                | 0              | -1.554775               | 1.334620  | -1.013810 |
| 18               | 1                | 0              | -1.574646               | 1.876764  | 0.672979  |
| 19               | 1                | 0              | -1.460709               | -0.363095 | 1.490342  |
| 20               | 6                | 0              | -2.183363               | -1.143534 | -0.393696 |
| 21               | 1                | 0              | -2.075357               | -0.886122 | -1.459464 |
| 22               | 6                | 0              | -3.668030               | -1.092833 | -0.035521 |
| 23               | 1                | 0              | -3.774205               | -1.351959 | 1.027451  |
| 24               | 6                | 0              | -4.339836               | 0.257444  | -0.273173 |
| 25               | 1                | 0              | -4.093696               | 0.613908  | -1.278249 |
| 26               | 6                | 0              | -5.850530               | 0.153299  | -0.140752 |
| 27               | 1                | 0              | -6.296199               | 1.113960  | -0.422708 |
| 28               | 1                | 0              | -6.226813               | -0.644320 | -0.783739 |
| 29               | 8                | 0              | -1.840884               | -2.508424 | -0.200760 |
| 30               | 1                | 0              | -0.877684               | -2.550890 | -0.200724 |
| 31               | 8                | 0              | -4.340608               | -2.039574 | -0.844053 |
| 32               | 1                | 0              | -3.803176               | -2.839198 | -0.817838 |
| 33               | 8                | 0              | -3.857246               | 1.216098  | 0.651006  |
| 34               | 1                | 0              | -4.347214               | 1.055755  | 1.466964  |
| 35               | 8                | 0              | -6.087472               | -0.121517 | 1.236314  |
| 36               | 1                | 0              | -7.028817               | -0.225323 | 1.381275  |
| 37               | 6                | 0              | 0.782922                | 2.496940  | -0.898821 |
| 38               | 1                | 0              | 1.875461                | 2.470836  | -0.938115 |
| 39               | 1                | 0              | 0.412137                | 2.372681  | -1.933484 |

|    |   |   |           |           |           |
|----|---|---|-----------|-----------|-----------|
| 40 | 6 | 0 | 0.319382  | 3.834876  | -0.340731 |
| 41 | 1 | 0 | 0.728759  | 4.656374  | -0.930961 |
| 42 | 1 | 0 | -0.769172 | 3.919187  | -0.358406 |
| 43 | 1 | 0 | 0.656296  | 3.943409  | 0.691681  |
| 44 | 8 | 0 | 6.309430  | -0.563025 | 0.843280  |
| 45 | 6 | 0 | 7.270354  | -0.920696 | -0.126576 |
| 46 | 1 | 0 | 7.342131  | -0.162449 | -0.913263 |
| 47 | 1 | 0 | 8.219910  | -0.985363 | 0.399595  |
| 48 | 1 | 0 | 7.037986  | -1.891211 | -0.576981 |

### Structure 31a ( $^2E$ ec-ax H-bond O) (M06-2X, Benzene)

Energy (Hartrees): = - 1130.6822235  
No imaginary frequencies

Standard orientation:

| Center<br>Number | Atomic<br>Number | Atomic<br>Type | Coordinates (Angstroms) |           |           |
|------------------|------------------|----------------|-------------------------|-----------|-----------|
|                  |                  |                | X                       | Y         | Z         |
| 1                | 6                | 0              | -2.214360               | 0.166271  | 0.645489  |
| 2                | 6                | 0              | -2.240486               | -1.090317 | 0.031814  |
| 3                | 6                | 0              | -3.432263               | -1.643824 | -0.398855 |
| 4                | 6                | 0              | -4.636547               | -0.956227 | -0.215265 |
| 5                | 6                | 0              | -4.630115               | 0.288624  | 0.410804  |
| 6                | 6                | 0              | -3.418280               | 0.832005  | 0.834455  |
| 7                | 1                | 0              | -1.319097               | -1.648952 | -0.086444 |
| 8                | 1                | 0              | -3.465886               | -2.618748 | -0.870111 |
| 9                | 1                | 0              | -5.548039               | 0.834333  | 0.582866  |
| 10               | 1                | 0              | -3.422313               | 1.797870  | 1.331208  |
| 11               | 6                | 0              | -0.911455               | 0.826446  | 1.059573  |
| 12               | 1                | 0              | -1.111401               | 1.517493  | 1.885669  |
| 13               | 7                | 0              | -0.199955               | 1.550647  | 0.003362  |
| 14               | 8                | 0              | 0.023070                | -0.150893 | 1.486971  |
| 15               | 6                | 0              | 1.078010                | -0.293165 | 0.515686  |
| 16               | 6                | 0              | 0.607513                | 0.543836  | -0.670375 |
| 17               | 1                | 0              | 1.440009                | 1.002307  | -1.201977 |
| 18               | 1                | 0              | 0.031831                | -0.060478 | -1.388477 |
| 19               | 1                | 0              | 1.171765                | -1.355141 | 0.281591  |
| 20               | 6                | 0              | 2.371187                | 0.234770  | 1.152632  |
| 21               | 1                | 0              | 2.410898                | 1.325394  | 1.013447  |
| 22               | 6                | 0              | 3.665365                | -0.382369 | 0.626269  |
| 23               | 1                | 0              | 3.610041                | -1.469544 | 0.779344  |
| 24               | 6                | 0              | 3.942713                | -0.117704 | -0.851631 |
| 25               | 1                | 0              | 3.842385                | 0.953926  | -1.051979 |
| 26               | 6                | 0              | 5.340085                | -0.561707 | -1.247884 |
| 27               | 1                | 0              | 5.529473                | -0.252080 | -2.281907 |
| 28               | 1                | 0              | 6.080154                | -0.112614 | -0.582511 |
| 29               | 8                | 0              | 2.387293                | -0.069248 | 2.539987  |
| 30               | 1                | 0              | 1.476852                | 0.020923  | 2.845195  |
| 31               | 8                | 0              | 4.744859                | 0.163856  | 1.363822  |
| 32               | 1                | 0              | 4.470857                | 0.139349  | 2.287677  |
| 33               | 8                | 0              | 2.991554                | -0.796989 | -1.657351 |
| 34               | 1                | 0              | 3.313466                | -1.704904 | -1.721998 |
| 35               | 8                | 0              | 5.334399                | -1.982628 | -1.145123 |
| 36               | 1                | 0              | 6.189821                | -2.317856 | -1.422369 |
| 37               | 6                | 0              | -1.020756               | 2.384404  | -0.861862 |
| 38               | 1                | 0              | -1.685435               | 1.774870  | -1.494942 |
| 39               | 1                | 0              | -1.662882               | 2.996394  | -0.220478 |
| 40               | 6                | 0              | -0.165628               | 3.294084  | -1.732669 |
| 41               | 1                | 0              | -0.800287               | 3.974868  | -2.303805 |
| 42               | 1                | 0              | 0.512343                | 3.885779  | -1.113668 |
| 43               | 1                | 0              | 0.429798                | 2.722246  | -2.447697 |
| 44               | 8                | 0              | -5.750246               | -1.584831 | -0.663523 |
| 45               | 6                | 0              | -6.994763               | -0.943275 | -0.461839 |
| 46               | 1                | 0              | -7.040899               | 0.014927  | -0.989520 |
| 47               | 1                | 0              | -7.747896               | -1.613298 | -0.871985 |
| 48               | 1                | 0              | -7.194647               | -0.786828 | 0.603016  |

### Structure 31a ( $^2E$ ec-ax H-bond N) (M06-2X, Benzene)

Energy (Hartrees): = - 1130.6859297  
No imaginary frequencies

Standard orientation:

| Center<br>Number | Atomic<br>Number | Atomic<br>Type | Coordinates (Angstroms) |           |           |
|------------------|------------------|----------------|-------------------------|-----------|-----------|
|                  |                  |                | X                       | Y         | Z         |
| 1                | 6                | 0              | -1.753009               | -0.110889 | 0.391958  |
| 2                | 6                | 0              | -1.989629               | -0.811706 | -0.794676 |
| 3                | 6                | 0              | -3.248825               | -1.302749 | -1.088017 |
| 4                | 6                | 0              | -4.305394               | -1.114678 | -0.190890 |
| 5                | 6                | 0              | -4.079909               | -0.439302 | 1.007592  |
| 6                | 6                | 0              | -2.805135               | 0.050977  | 1.284270  |
| 7                | 1                | 0              | -1.170519               | -0.994620 | -1.480667 |

|    |   |   |           |           |           |
|----|---|---|-----------|-----------|-----------|
| 8  | 1 | 0 | -3.443003 | -1.851170 | -2.001976 |
| 9  | 1 | 0 | -4.872922 | -0.299339 | 1.729685  |
| 10 | 1 | 0 | -2.634836 | 0.566445  | 2.224914  |
| 11 | 6 | 0 | -0.397952 | 0.497911  | 0.697733  |
| 12 | 1 | 0 | -0.254553 | 0.532673  | 1.783214  |
| 13 | 7 | 0 | -0.181589 | 1.854476  | 0.160976  |
| 14 | 8 | 0 | 0.637595  | -0.264181 | 0.110284  |
| 15 | 6 | 0 | 1.243920  | 0.467043  | -0.969897 |
| 16 | 6 | 0 | 0.281922  | 1.628736  | -1.207598 |
| 17 | 1 | 0 | 0.794217  | 2.510944  | -1.592658 |
| 18 | 1 | 0 | -0.536661 | 1.355755  | -1.888778 |
| 19 | 1 | 0 | 1.323995  | -0.206703 | -1.820202 |
| 20 | 6 | 0 | 2.644606  | 0.947411  | -0.574067 |
| 21 | 1 | 0 | 3.187679  | 1.210799  | -1.491040 |
| 22 | 6 | 0 | 3.470420  | -0.086355 | 0.199688  |
| 23 | 1 | 0 | 2.890256  | -0.399209 | 1.076031  |
| 24 | 6 | 0 | 3.860143  | -1.325934 | -0.603181 |
| 25 | 1 | 0 | 4.459879  | -1.011354 | -1.462692 |
| 26 | 6 | 0 | 4.680987  | -2.283982 | 0.243434  |
| 27 | 1 | 0 | 5.001522  | -3.120522 | -0.387484 |
| 28 | 1 | 0 | 5.556752  | -1.768307 | 0.647643  |
| 29 | 8 | 0 | 2.604565  | 2.124695  | 0.231755  |
| 30 | 1 | 0 | 1.701219  | 2.211172  | 0.584153  |
| 31 | 8 | 0 | 4.682941  | 0.528137  | 0.604480  |
| 32 | 1 | 0 | 4.426436  | 1.396351  | 0.936845  |
| 33 | 8 | 0 | 2.723502  | -1.997762 | -1.115234 |
| 34 | 1 | 0 | 2.227839  | -2.312352 | -0.348943 |
| 35 | 8 | 0 | 3.817839  | -2.739498 | 1.279164  |
| 36 | 1 | 0 | 4.278806  | -3.409098 | 1.788782  |
| 37 | 6 | 0 | -1.281751 | 2.797659  | 0.320384  |
| 38 | 1 | 0 | -2.152467 | 2.495549  | -0.280170 |
| 39 | 1 | 0 | -1.588095 | 2.768595  | 1.370401  |
| 40 | 6 | 0 | -0.854679 | 4.211211  | -0.048187 |
| 41 | 1 | 0 | -1.653366 | 4.917703  | 0.185787  |
| 42 | 1 | 0 | 0.039355  | 4.501217  | 0.508691  |
| 43 | 1 | 0 | -0.638353 | 4.300371  | -1.114861 |
| 44 | 8 | 0 | -5.499505 | -1.632143 | -0.566600 |
| 45 | 6 | 0 | -6.590492 | -1.484748 | 0.322055  |
| 46 | 1 | 0 | -6.818178 | -0.429473 | 0.503692  |
| 47 | 1 | 0 | -7.441451 | -1.955441 | -0.166395 |
| 48 | 1 | 0 | -6.399260 | -1.988933 | 1.274788  |

-----

### Structure 31a (<sup>2</sup>E ax-ax) (M06-2X, Benzene)

Energy (Hartrees): = - 1130.684812  
 No imaginary frequencies

Standard orientation:

| Center Number | Atomic Number | Atomic Type | Coordinates (Angstroms) |           |           |
|---------------|---------------|-------------|-------------------------|-----------|-----------|
|               |               |             | X                       | Y         | Z         |
| 1             | 6             | 0           | -2.136059               | 0.552129  | 0.402778  |
| 2             | 6             | 0           | -2.323603               | -0.440350 | 1.366822  |
| 3             | 6             | 0           | -3.410887               | -1.295107 | 1.300554  |
| 4             | 6             | 0           | -4.343215               | -1.167668 | 0.268010  |
| 5             | 6             | 0           | -4.169903               | -0.175499 | -0.697514 |
| 6             | 6             | 0           | -3.066937               | 0.671529  | -0.622070 |
| 7             | 1             | 0           | -1.602294               | -0.541416 | 2.169087  |
| 8             | 1             | 0           | -3.562426               | -2.073634 | 2.038561  |
| 9             | 1             | 0           | -4.874531               | -0.056489 | -1.509426 |
| 10            | 1             | 0           | -2.918593               | 1.429398  | -1.383337 |
| 11            | 6             | 0           | -0.963998               | 1.515166  | 0.486503  |
| 12            | 1             | 0           | -1.278518               | 2.457682  | 0.940538  |
| 13            | 7             | 0           | -0.360243               | 1.744989  | -0.807946 |
| 14            | 8             | 0           | 0.074739                | 0.983512  | 1.316338  |
| 15            | 6             | 0           | 0.929575                | 0.186701  | 0.480058  |
| 16            | 6             | 0           | 0.492494                | 0.557698  | -0.960367 |
| 17            | 1             | 0           | 1.332244                | 0.770929  | -1.619005 |
| 18            | 1             | 0           | -0.082537               | -0.257085 | -1.399442 |
| 19            | 1             | 0           | 0.750623                | -0.870295 | 0.695176  |
| 20            | 6             | 0           | 2.369361                | 0.566624  | 0.836886  |
| 21            | 1             | 0           | 2.643435                | 1.488081  | 0.300058  |
| 22            | 6             | 0           | 3.427321                | -0.494675 | 0.542713  |
| 23            | 1             | 0           | 3.159475                | -1.404788 | 1.097993  |
| 24            | 6             | 0           | 3.573418                | -0.853058 | -0.934366 |
| 25            | 1             | 0           | 3.708943                | 0.064623  | -1.515916 |
| 26            | 6             | 0           | 4.765095                | -1.763782 | -1.173724 |
| 27            | 1             | 0           | 4.886031                | -1.907634 | -2.253209 |
| 28            | 1             | 0           | 5.670892                | -1.320626 | -0.753991 |
| 29            | 8             | 0           | 2.483845                | 0.785951  | 2.236482  |
| 30            | 1             | 0           | 1.684455                | 1.253250  | 2.505209  |
| 31            | 8             | 0           | 4.680587                | -0.000939 | 0.981065  |
| 32            | 1             | 0           | 4.527341                | 0.364410  | 1.859746  |
| 33            | 8             | 0           | 2.397209                | -1.489853 | -1.405220 |
| 34            | 1             | 0           | 2.468974                | -2.408306 | -1.116215 |

|    |   |   |           |           |           |
|----|---|---|-----------|-----------|-----------|
| 35 | 8 | 0 | 4.440511  | -2.996573 | -0.538443 |
| 36 | 1 | 0 | 5.126171  | -3.637626 | -0.738194 |
| 37 | 6 | 0 | 0.372030  | 3.020580  | -0.852057 |
| 38 | 1 | 0 | 0.927430  | 3.201329  | 0.080582  |
| 39 | 1 | 0 | 1.106682  | 2.949868  | -1.657013 |
| 40 | 6 | 0 | -0.572009 | 4.178950  | -1.137013 |
| 41 | 1 | 0 | -0.021124 | 5.121100  | -1.187661 |
| 42 | 1 | 0 | -1.083010 | 4.020641  | -2.088930 |
| 43 | 1 | 0 | -1.331705 | 4.280303  | -0.357678 |
| 44 | 8 | 0 | -5.372295 | -2.050980 | 0.283520  |
| 45 | 6 | 0 | -6.356616 | -1.931475 | -0.725344 |
| 46 | 1 | 0 | -5.928954 | -2.082793 | -1.721736 |
| 47 | 1 | 0 | -7.086428 | -2.714261 | -0.527907 |
| 48 | 1 | 0 | -6.854059 | -0.957106 | -0.682807 |

-----

**Structure 31a (E<sub>2</sub> ec-ec) (M06-2X, Benzene)**

Energy (Hartrees): = - 1130.6833593  
 No imaginary frequencies

Standard orientation:

| Center<br>Number | Atomic<br>Number | Atomic<br>Type | Coordinates (Angstroms) |           |           |
|------------------|------------------|----------------|-------------------------|-----------|-----------|
|                  |                  |                | X                       | Y         | Z         |
| 1                | 6                | 0              | 2.324062                | -0.055002 | -0.187733 |
| 2                | 6                | 0              | 2.791521                | 0.205301  | 1.104732  |
| 3                | 6                | 0              | 4.124502                | 0.034233  | 1.416350  |
| 4                | 6                | 0              | 5.025645                | -0.403784 | 0.435975  |
| 5                | 6                | 0              | 4.573607                | -0.660648 | -0.855543 |
| 6                | 6                | 0              | 3.220647                | -0.483146 | -1.152739 |
| 7                | 1                | 0              | 2.088884                | 0.549885  | 1.854679  |
| 8                | 1                | 0              | 4.505239                | 0.228139  | 2.411961  |
| 9                | 1                | 0              | 5.249353                | -0.996300 | -1.630434 |
| 10               | 1                | 0              | 2.869898                | -0.687661 | -2.159599 |
| 11               | 6                | 0              | 0.861934                | 0.121154  | -0.489918 |
| 12               | 1                | 0              | 0.677754                | -0.060505 | -1.567890 |
| 13               | 7                | 0              | 0.341403                | 1.412770  | -0.078640 |
| 14               | 8                | 0              | 0.099335                | -0.795442 | 0.278570  |
| 15               | 6                | 0              | -1.225164               | -0.257089 | 0.444710  |
| 16               | 6                | 0              | -1.103014               | 1.209663  | -0.000435 |
| 17               | 1                | 0              | -1.584145               | 1.355547  | -0.984108 |
| 18               | 1                | 0              | -1.565481               | 1.893730  | 0.704343  |
| 19               | 1                | 0              | -1.476558               | -0.350470 | 1.503392  |
| 20               | 6                | 0              | -2.164998               | -1.130162 | -0.396439 |
| 21               | 1                | 0              | -2.052061               | -0.857849 | -1.457574 |
| 22               | 6                | 0              | -3.653000               | -1.103834 | -0.048677 |
| 23               | 1                | 0              | -3.762321               | -1.396766 | 1.005078  |
| 24               | 6                | 0              | -4.338869               | 0.245595  | -0.248471 |
| 25               | 1                | 0              | -4.098970               | 0.633719  | -1.243100 |
| 26               | 6                | 0              | -5.847961               | 0.129438  | -0.116770 |
| 27               | 1                | 0              | -6.295628               | 1.101056  | -0.353921 |
| 28               | 1                | 0              | -6.230656               | -0.633463 | -0.797824 |
| 29               | 8                | 0              | -1.805627               | -2.494873 | -0.219868 |
| 30               | 1                | 0              | -0.841614               | -2.522239 | -0.210461 |
| 31               | 8                | 0              | -4.309850               | -2.036354 | -0.888983 |
| 32               | 1                | 0              | -3.768615               | -2.833839 | -0.871804 |
| 33               | 8                | 0              | -3.861000               | 1.180798  | 0.703606  |
| 34               | 1                | 0              | -4.338388               | 0.982457  | 1.519242  |
| 35               | 8                | 0              | -6.087721               | -0.212784 | 1.244708  |
| 36               | 1                | 0              | -7.034668               | -0.227872 | 1.399629  |
| 37               | 6                | 0              | 0.748570                | 2.504420  | -0.950205 |
| 38               | 1                | 0              | 1.840177                | 2.487616  | -1.013471 |
| 39               | 1                | 0              | 0.355315                | 2.352376  | -1.972105 |
| 40               | 6                | 0              | 0.287774                | 3.852479  | -0.417067 |
| 41               | 1                | 0              | 0.678109                | 4.660194  | -1.039332 |
| 42               | 1                | 0              | -0.801755               | 3.931752  | -0.412738 |
| 43               | 1                | 0              | 0.647024                | 3.996250  | 0.604118  |
| 44               | 8                | 0              | 6.310567                | -0.544834 | 0.840697  |
| 45               | 6                | 0              | 7.250494                | -1.017098 | -0.105276 |
| 46               | 1                | 0              | 7.350341                | -0.326043 | -0.948477 |
| 47               | 1                | 0              | 8.201368                | -1.079422 | 0.420320  |
| 48               | 1                | 0              | 6.977447                | -2.010888 | -0.474246 |

-----

**Structure 31a (<sup>2</sup>E ec-ax H-bond O) (M06-2X, DMSO)**

Energy (Hartrees): = - 1130.6869354  
 No imaginary frequencies

Standard orientation:

| Center<br>Number | Atomic<br>Number | Atomic<br>Type | Coordinates (Angstroms) |   |   |
|------------------|------------------|----------------|-------------------------|---|---|
|                  |                  |                | X                       | Y | Z |



|    |   |   |           |           |           |
|----|---|---|-----------|-----------|-----------|
| 1  | 6 | 0 | -2.188991 | 0.282372  | 0.667291  |
| 2  | 6 | 0 | -2.166441 | -1.067336 | 0.299666  |
| 3  | 6 | 0 | -3.328927 | -1.720080 | -0.074653 |
| 4  | 6 | 0 | -4.550482 | -1.037675 | -0.086159 |
| 5  | 6 | 0 | -4.592531 | 0.303918  | 0.295195  |
| 6  | 6 | 0 | -3.411732 | 0.944070  | 0.669347  |
| 7  | 1 | 0 | -1.233967 | -1.620444 | 0.321929  |
| 8  | 1 | 0 | -3.318469 | -2.766433 | -0.357770 |
| 9  | 1 | 0 | -5.524052 | 0.853840  | 0.312312  |
| 10 | 1 | 0 | -3.453502 | 1.986464  | 0.971919  |
| 11 | 6 | 0 | -0.918568 | 1.039937  | 1.013842  |
| 12 | 1 | 0 | -1.158132 | 1.828670  | 1.733517  |
| 13 | 7 | 0 | -0.207974 | 1.630919  | -0.122091 |
| 14 | 8 | 0 | 0.042573  | 0.166801  | 1.585106  |
| 15 | 6 | 0 | 1.052680  | -0.158795 | 0.606045  |
| 16 | 6 | 0 | 0.579162  | 0.532692  | -0.670478 |
| 17 | 1 | 0 | 1.409230  | 0.910936  | -1.264811 |
| 18 | 1 | 0 | -0.017353 | -0.145769 | -1.298853 |
| 19 | 1 | 0 | 1.094748  | -1.245298 | 0.511304  |
| 20 | 6 | 0 | 2.386020  | 0.389997  | 1.125949  |
| 21 | 1 | 0 | 2.456629  | 1.454224  | 0.855431  |
| 22 | 6 | 0 | 3.637189  | -0.327621 | 0.625778  |
| 23 | 1 | 0 | 3.569298  | -1.380494 | 0.934533  |
| 24 | 6 | 0 | 3.837797  | -0.282170 | -0.888302 |
| 25 | 1 | 0 | 3.732035  | 0.748973  | -1.238690 |
| 26 | 6 | 0 | 5.206474  | -0.798283 | -1.294904 |
| 27 | 1 | 0 | 5.324004  | -0.662604 | -2.375114 |
| 28 | 1 | 0 | 5.993412  | -0.251972 | -0.770630 |
| 29 | 8 | 0 | 2.450275  | 0.252621  | 2.540096  |
| 30 | 1 | 0 | 1.568168  | 0.465687  | 2.867993  |
| 31 | 8 | 0 | 4.765531  | 0.287731  | 1.227837  |
| 32 | 1 | 0 | 4.535323  | 0.405233  | 2.156677  |
| 33 | 8 | 0 | 2.839677  | -1.061075 | -1.533594 |
| 34 | 1 | 0 | 3.144738  | -1.974584 | -1.456728 |
| 35 | 8 | 0 | 5.219031  | -2.183797 | -0.959779 |
| 36 | 1 | 0 | 5.989874  | -2.588406 | -1.367995 |
| 37 | 6 | 0 | -1.030249 | 2.353992  | -1.082838 |
| 38 | 1 | 0 | -1.695278 | 1.671011  | -1.635636 |
| 39 | 1 | 0 | -1.668662 | 3.041626  | -0.519720 |
| 40 | 6 | 0 | -0.171076 | 3.142405  | -2.060764 |
| 41 | 1 | 0 | -0.801822 | 3.760729  | -2.703079 |
| 42 | 1 | 0 | 0.518150  | 3.794943  | -1.519110 |
| 43 | 1 | 0 | 0.414567  | 2.481979  | -2.704310 |
| 44 | 8 | 0 | -5.630287 | -1.758913 | -0.469093 |
| 45 | 6 | 0 | -6.884975 | -1.094748 | -0.504681 |
| 46 | 1 | 0 | -6.865533 | -0.249114 | -1.198493 |
| 47 | 1 | 0 | -7.604723 | -1.831200 | -0.856711 |
| 48 | 1 | 0 | -7.179365 | -0.747425 | 0.490082  |

-----  
**Structure 31a (<sup>2</sup>E ec-ax H-bond N) (M06-2X, DMSO)**

Energy (Hartrees): = - 1130.6903405  
 No imaginary frequencies

Standard orientation:

| Center Number | Atomic Number | Atomic Type | Coordinates (Angstroms) |           |           |
|---------------|---------------|-------------|-------------------------|-----------|-----------|
|               |               |             | X                       | Y         | Z         |
| 1             | 6             | 0           | -1.759802               | -0.124095 | 0.409731  |
| 2             | 6             | 0           | -1.981776               | -0.848982 | -0.765522 |
| 3             | 6             | 0           | -3.238026               | -1.349857 | -1.062257 |
| 4             | 6             | 0           | -4.307201               | -1.140578 | -0.183424 |
| 5             | 6             | 0           | -4.095654               | -0.439913 | 1.004556  |
| 6             | 6             | 0           | -2.823839               | 0.056373  | 1.286287  |
| 7             | 1             | 0           | -1.159361               | -1.036572 | -1.446913 |
| 8             | 1             | 0           | -3.417963               | -1.913019 | -1.970815 |
| 9             | 1             | 0           | -4.898337               | -0.280942 | 1.712229  |
| 10            | 1             | 0           | -2.664154               | 0.595513  | 2.215440  |
| 11            | 6             | 0           | -0.412474               | 0.500244  | 0.719783  |
| 12            | 1             | 0           | -0.283887               | 0.558668  | 1.805284  |
| 13            | 7             | 0           | -0.202503               | 1.845176  | 0.154873  |
| 14            | 8             | 0           | 0.638044                | -0.265830 | 0.157750  |
| 15            | 6             | 0           | 1.226365                | 0.441878  | -0.950412 |
| 16            | 6             | 0           | 0.251796                | 1.587045  | -1.212092 |
| 17            | 1             | 0           | 0.748397                | 2.462909  | -1.630223 |
| 18            | 1             | 0           | -0.568780               | 1.285121  | -1.877328 |
| 19            | 1             | 0           | 1.305327                | -0.249427 | -1.785872 |
| 20            | 6             | 0           | 2.623183                | 0.947863  | -0.577459 |
| 21            | 1             | 0           | 3.146119                | 1.213353  | -1.505343 |
| 22            | 6             | 0           | 3.476912                | -0.065162 | 0.192848  |
| 23            | 1             | 0           | 2.905197                | -0.391323 | 1.069944  |
| 24            | 6             | 0           | 3.896013                | -1.294982 | -0.609749 |
| 25            | 1             | 0           | 4.478597                | -0.968225 | -1.476238 |
| 26            | 6             | 0           | 4.745985                | -2.234034 | 0.228478  |
| 27            | 1             | 0           | 5.067284                | -3.068979 | -0.402681 |

|    |   |   |           |           |           |
|----|---|---|-----------|-----------|-----------|
| 28 | 1 | 0 | 5.625543  | -1.708515 | 0.611158  |
| 29 | 8 | 0 | 2.569816  | 2.127080  | 0.228045  |
| 30 | 1 | 0 | 1.653421  | 2.221602  | 0.548911  |
| 31 | 8 | 0 | 4.673700  | 0.581710  | 0.602162  |
| 32 | 1 | 0 | 4.388510  | 1.445467  | 0.924326  |
| 33 | 8 | 0 | 2.769715  | -1.998291 | -1.108584 |
| 34 | 1 | 0 | 2.292361  | -2.317644 | -0.332473 |
| 35 | 8 | 0 | 3.914560  | -2.697202 | 1.288644  |
| 36 | 1 | 0 | 4.338429  | -3.460062 | 1.691548  |
| 37 | 6 | 0 | -1.308722 | 2.785327  | 0.297973  |
| 38 | 1 | 0 | -2.172427 | 2.472105  | -0.306982 |
| 39 | 1 | 0 | -1.620843 | 2.766629  | 1.346220  |
| 40 | 6 | 0 | -0.886813 | 4.194569  | -0.089961 |
| 41 | 1 | 0 | -1.694798 | 4.897656  | 0.122084  |
| 42 | 1 | 0 | -0.002968 | 4.501339  | 0.475114  |
| 43 | 1 | 0 | -0.656606 | 4.263618  | -1.155442 |
| 44 | 8 | 0 | -5.497769 | -1.660903 | -0.562678 |
| 45 | 6 | 0 | -6.608807 | -1.457336 | 0.298635  |
| 46 | 1 | 0 | -6.811194 | -0.391497 | 0.439225  |
| 47 | 1 | 0 | -7.459284 | -1.924597 | -0.193686 |
| 48 | 1 | 0 | -6.448420 | -1.932073 | 1.271206  |

### Structure 31a (<sup>2</sup>E ax-ax) (M06-2X, DMSO)

Energy (Hartrees): = - 1130.6887685  
No imaginary frequencies

Standard orientation:

| Center<br>Number | Atomic<br>Number | Atomic<br>Type | Coordinates (Angstroms) |           |           |
|------------------|------------------|----------------|-------------------------|-----------|-----------|
|                  |                  |                | X                       | Y         | Z         |
| 1                | 6                | 0              | -2.136018               | 0.552427  | 0.403563  |
| 2                | 6                | 0              | -2.295269               | -0.477398 | 1.332915  |
| 3                | 6                | 0              | -3.383360               | -1.333238 | 1.263620  |
| 4                | 6                | 0              | -4.344889               | -1.171822 | 0.261640  |
| 5                | 6                | 0              | -4.200161               | -0.141677 | -0.670189 |
| 6                | 6                | 0              | -3.097497               | 0.706026  | -0.589936 |
| 7                | 1                | 0              | -1.555282               | -0.609291 | 2.113709  |
| 8                | 1                | 0              | -3.509838               | -2.137362 | 1.979199  |
| 9                | 1                | 0              | -4.927089               | 0.007634  | -1.457596 |
| 10               | 1                | 0              | -2.981442               | 1.496995  | -1.323249 |
| 11               | 6                | 0              | -0.964156               | 1.516725  | 0.485393  |
| 12               | 1                | 0              | -1.283211               | 2.463245  | 0.926915  |
| 13               | 7                | 0              | -0.355781               | 1.733511  | -0.810745 |
| 14               | 8                | 0              | 0.070543                | 0.991494  | 1.323371  |
| 15               | 6                | 0              | 0.927508                | 0.185664  | 0.496803  |
| 16               | 6                | 0              | 0.498201                | 0.543905  | -0.947889 |
| 17               | 1                | 0              | 1.342256                | 0.755519  | -1.601586 |
| 18               | 1                | 0              | -0.074625               | -0.275723 | -1.381968 |
| 19               | 1                | 0              | 0.747796                | -0.869162 | 0.722592  |
| 20               | 6                | 0              | 2.366772                | 0.566201  | 0.849376  |
| 21               | 1                | 0              | 2.637107                | 1.489215  | 0.315144  |
| 22               | 6                | 0              | 3.421790                | -0.493844 | 0.544539  |
| 23               | 1                | 0              | 3.160123                | -1.403152 | 1.104264  |
| 24               | 6                | 0              | 3.544949                | -0.854835 | -0.934917 |
| 25               | 1                | 0              | 3.634653                | 0.062632  | -1.524734 |
| 26               | 6                | 0              | 4.752799                | -1.733498 | -1.206661 |
| 27               | 1                | 0              | 4.835695                | -1.886703 | -2.287553 |
| 28               | 1                | 0              | 5.663764                | -1.259666 | -0.834620 |
| 29               | 8                | 0              | 2.483653                | 0.778620  | 2.252252  |
| 30               | 1                | 0              | 1.709742                | 1.292429  | 2.512578  |
| 31               | 8                | 0              | 4.680632                | 0.001115  | 0.972670  |
| 32               | 1                | 0              | 4.528333                | 0.384563  | 1.844254  |
| 33               | 8                | 0              | 2.374275                | -1.531335 | -1.369148 |
| 34               | 1                | 0              | 2.483345                | -2.442450 | -1.067109 |
| 35               | 8                | 0              | 4.497475                | -2.969345 | -0.543434 |
| 36               | 1                | 0              | 5.125584                | -3.622236 | -0.866034 |
| 37               | 6                | 0              | 0.386203                | 3.006619  | -0.855459 |
| 38               | 1                | 0              | 0.933577                | 3.185647  | 0.081197  |
| 39               | 1                | 0              | 1.127821                | 2.925562  | -1.652691 |
| 40               | 6                | 0              | -0.547990               | 4.169683  | -1.150117 |
| 41               | 1                | 0              | 0.012456                | 5.106655  | -1.194435 |
| 42               | 1                | 0              | -1.049296               | 4.019134  | -2.109157 |
| 43               | 1                | 0              | -1.313944               | 4.275890  | -0.377288 |
| 44               | 8                | 0              | -5.372121               | -2.054738 | 0.272294  |
| 45               | 6                | 0              | -6.377753               | -1.903375 | -0.718856 |
| 46               | 1                | 0              | -5.964127               | -2.021692 | -1.724694 |
| 47               | 1                | 0              | -7.102932               | -2.693099 | -0.533223 |
| 48               | 1                | 0              | -6.872414               | -0.931052 | -0.635699 |

### Structure 31a (E<sub>2</sub> ec-ec) (M06-2X, DMSO)

Energy (Hartrees): = - 1130.6877561  
No imaginary frequencies

Standard orientation:

| Center<br>Number | Atomic<br>Number | Atomic<br>Type | Coordinates (Angstroms) |           |           |
|------------------|------------------|----------------|-------------------------|-----------|-----------|
|                  |                  |                | X                       | Y         | Z         |
| 1                | 6                | 0              | 2.319560                | -0.122912 | -0.167934 |
| 2                | 6                | 0              | 2.765226                | -0.046674 | 1.156174  |
| 3                | 6                | 0              | 4.103754                | -0.202850 | 1.458293  |
| 4                | 6                | 0              | 5.034537                | -0.434321 | 0.434288  |
| 5                | 6                | 0              | 4.603365                | -0.507376 | -0.888938 |
| 6                | 6                | 0              | 3.244738                | -0.352317 | -1.174603 |
| 7                | 1                | 0              | 2.046011                | 0.137387  | 1.946637  |
| 8                | 1                | 0              | 4.462182                | -0.148987 | 2.479776  |
| 9                | 1                | 0              | 5.300810                | -0.681568 | -1.697261 |
| 10               | 1                | 0              | 2.910742                | -0.410180 | -2.206013 |
| 11               | 6                | 0              | 0.859881                | 0.072866  | -0.471019 |
| 12               | 1                | 0              | 0.678021                | -0.075457 | -1.552206 |
| 13               | 7                | 0              | 0.358155                | 1.365930  | -0.028698 |
| 14               | 8                | 0              | 0.082317                | -0.850699 | 0.274539  |
| 15               | 6                | 0              | -1.236186               | -0.294993 | 0.448786  |
| 16               | 6                | 0              | -1.092073               | 1.176455  | 0.028679  |
| 17               | 1                | 0              | -1.553861               | 1.340998  | -0.959930 |
| 18               | 1                | 0              | -1.554317               | 1.854060  | 0.739800  |
| 19               | 1                | 0              | -1.492486               | -0.404012 | 1.504849  |
| 20               | 6                | 0              | -2.188378               | -1.131571 | -0.412908 |
| 21               | 1                | 0              | -2.062390               | -0.839369 | -1.466211 |
| 22               | 6                | 0              | -3.676270               | -1.073889 | -0.073767 |
| 23               | 1                | 0              | -3.801342               | -1.403461 | 0.967497  |
| 24               | 6                | 0              | -4.312506               | 0.307387  | -0.221885 |
| 25               | 1                | 0              | -4.015008               | 0.748161  | -1.178034 |
| 26               | 6                | 0              | -5.828364               | 0.245263  | -0.159153 |
| 27               | 1                | 0              | -6.224357               | 1.249488  | -0.341829 |
| 28               | 1                | 0              | -6.218070               | -0.443561 | -0.911418 |
| 29               | 8                | 0              | -1.859952               | -2.509511 | -0.261414 |
| 30               | 1                | 0              | -0.897467               | -2.560940 | -0.299729 |
| 31               | 8                | 0              | -4.354272               | -1.957586 | -0.952848 |
| 32               | 1                | 0              | -3.825968               | -2.764021 | -0.973763 |
| 33               | 8                | 0              | -3.844129               | 1.162999  | 0.809530  |
| 34               | 1                | 0              | -4.358521               | 0.919825  | 1.590673  |
| 35               | 8                | 0              | -6.148662               | -0.186726 | 1.161069  |
| 36               | 1                | 0              | -7.085355               | -0.031501 | 1.312669  |
| 37               | 6                | 0              | 0.773679                | 2.461806  | -0.896400 |
| 38               | 1                | 0              | 1.864516                | 2.432476  | -0.971075 |
| 39               | 1                | 0              | 0.368857                | 2.320716  | -1.913623 |
| 40               | 6                | 0              | 0.336048                | 3.811210  | -0.348846 |
| 41               | 1                | 0              | 0.726087                | 4.616551  | -0.974585 |
| 42               | 1                | 0              | -0.752578               | 3.901508  | -0.328101 |
| 43               | 1                | 0              | 0.712878                | 3.949841  | 0.667374  |
| 44               | 8                | 0              | 6.321895                | -0.571953 | 0.827424  |
| 45               | 6                | 0              | 7.294588                | -0.803354 | -0.181573 |
| 46               | 1                | 0              | 7.339345                | 0.032123  | -0.886265 |
| 47               | 1                | 0              | 8.248511                | -0.891360 | 0.334376  |
| 48               | 1                | 0              | 7.089500                | -1.730798 | -0.724278 |

**Structure 31b (<sup>2</sup>E ec-ec H-bond O) (M06-2X, Gas Phase)**

Energy (Hartrees): = - 1130.6661191  
 No imaginary frequencies

Standard orientation:

| Center<br>Number | Atomic<br>Number | Atomic<br>Type | Coordinates (Angstroms) |           |           |
|------------------|------------------|----------------|-------------------------|-----------|-----------|
|                  |                  |                | X                       | Y         | Z         |
| 1                | 6                | 0              | -2.181664               | 0.356383  | -0.564337 |
| 2                | 6                | 0              | -2.157422               | -0.625714 | 0.432391  |
| 3                | 6                | 0              | -3.326880               | -1.216326 | 0.863179  |
| 4                | 6                | 0              | -4.554895               | -0.831732 | 0.308531  |
| 5                | 6                | 0              | -4.592644               | 0.144520  | -0.682243 |
| 6                | 6                | 0              | -3.398095               | 0.726635  | -1.110757 |
| 7                | 1                | 0              | -1.206251               | -0.916796 | 0.865852  |
| 8                | 1                | 0              | -3.331509               | -1.979855 | 1.631104  |
| 9                | 1                | 0              | -5.527027               | 0.457148  | -1.127506 |
| 10               | 1                | 0              | -3.427727               | 1.483301  | -1.888355 |
| 11               | 6                | 0              | -0.892989               | 0.986670  | -1.016758 |
| 12               | 1                | 0              | -1.098023               | 1.722685  | -1.817777 |
| 13               | 7                | 0              | -0.151884               | 1.594980  | 0.076560  |
| 14               | 8                | 0              | -0.007489               | 0.002396  | -1.537202 |
| 15               | 6                | 0              | 1.324037                | 0.250302  | -1.056881 |
| 16               | 6                | 0              | 1.221182                | 1.625892  | -0.407925 |
| 17               | 1                | 0              | 1.934032                | 1.759669  | 0.403243  |
| 18               | 1                | 0              | 1.383632                | 2.423361  | -1.152593 |
| 19               | 1                | 0              | 1.998979                | 0.230214  | -1.912657 |
| 20               | 6                | 0              | 1.677824                | -0.855781 | -0.048475 |
| 21               | 1                | 0              | 1.334456                | -0.543048 | 0.949378  |
| 22               | 6                | 0              | 3.160623                | -1.211363 | 0.032246  |

|    |   |   |           |           |           |
|----|---|---|-----------|-----------|-----------|
| 23 | 1 | 0 | 3.503231  | -1.494000 | -0.973599 |
| 24 | 6 | 0 | 4.048831  | -0.082347 | 0.549687  |
| 25 | 1 | 0 | 3.630867  | 0.298283  | 1.487375  |
| 26 | 6 | 0 | 5.467437  | -0.563517 | 0.804221  |
| 27 | 1 | 0 | 6.031691  | 0.240841  | 1.289449  |
| 28 | 1 | 0 | 5.448746  | -1.451656 | 1.438810  |
| 29 | 8 | 0 | 1.039436  | -2.072001 | -0.403301 |
| 30 | 1 | 0 | 0.223552  | -1.831752 | -0.860545 |
| 31 | 8 | 0 | 3.308753  | -2.297021 | 0.927159  |
| 32 | 1 | 0 | 2.615210  | -2.925369 | 0.697618  |
| 33 | 8 | 0 | 4.078185  | 0.993279  | -0.374429 |
| 34 | 1 | 0 | 4.733379  | 0.744585  | -1.037807 |
| 35 | 8 | 0 | 6.007441  | -0.845420 | -0.483468 |
| 36 | 1 | 0 | 6.907023  | -1.160339 | -0.385433 |
| 37 | 6 | 0 | -0.696956 | 2.878871  | 0.487314  |
| 38 | 1 | 0 | -0.635238 | 3.609155  | -0.340201 |
| 39 | 1 | 0 | -1.757267 | 2.727591  | 0.708718  |
| 40 | 6 | 0 | 0.011030  | 3.425884  | 1.718191  |
| 41 | 1 | 0 | -0.477157 | 4.338533  | 2.063802  |
| 42 | 1 | 0 | -0.017187 | 2.687819  | 2.521798  |
| 43 | 1 | 0 | 1.054773  | 3.666024  | 1.505586  |
| 44 | 8 | 0 | -5.645844 | -1.468255 | 0.803009  |
| 45 | 6 | 0 | -6.906239 | -1.115547 | 0.274048  |
| 46 | 1 | 0 | -7.635166 | -1.729348 | 0.797895  |
| 47 | 1 | 0 | -7.127881 | -0.057987 | 0.450442  |
| 48 | 1 | 0 | -6.958895 | -1.324721 | -0.799255 |

-----

**Structure 31b ( $^2E$  ec-ec H-bond N) (M06-2X, Gas Phase)**

Energy (Hartrees): = - 1130.6684178  
 No imaginary frequencies

Standard orientation:

| Center<br>Number | Atomic<br>Number | Atomic<br>Type | Coordinates (Angstroms) |           |           |
|------------------|------------------|----------------|-------------------------|-----------|-----------|
|                  |                  |                | X                       | Y         | Z         |
| 1                | 6                | 0              | -1.598542               | 0.249828  | -0.606714 |
| 2                | 6                | 0              | -1.442960               | -0.523311 | 0.549064  |
| 3                | 6                | 0              | -2.464093               | -1.341288 | 0.985554  |
| 4                | 6                | 0              | -3.669637               | -1.404954 | 0.274404  |
| 5                | 6                | 0              | -3.834614               | -0.644798 | -0.879513 |
| 6                | 6                | 0              | -2.789326               | 0.174279  | -1.309441 |
| 7                | 1                | 0              | -0.508988               | -0.477405 | 1.098400  |
| 8                | 1                | 0              | -2.365078               | -1.950699 | 1.875131  |
| 9                | 1                | 0              | -4.751582               | -0.681164 | -1.451096 |
| 10               | 1                | 0              | -2.915301               | 0.760318  | -2.214475 |
| 11               | 6                | 0              | -0.490317               | 1.159540  | -1.057286 |
| 12               | 1                | 0              | -0.727807               | 1.566647  | -2.058601 |
| 13               | 7                | 0              | -0.242424               | 2.260554  | -0.120146 |
| 14               | 8                | 0              | 0.744262                | 0.474663  | -1.113333 |
| 15               | 6                | 0              | 1.794211                | 1.339225  | -0.655566 |
| 16               | 6                | 0              | 1.104277                | 2.694589  | -0.491860 |
| 17               | 1                | 0              | 1.558609                | 3.299919  | 0.293794  |
| 18               | 1                | 0              | 1.100494                | 3.260129  | -1.437276 |
| 19               | 1                | 0              | 2.582299                | 1.349969  | -1.405371 |
| 20               | 6                | 0              | 2.360201                | 0.815886  | 0.665504  |
| 21               | 1                | 0              | 3.297281                | 1.352099  | 0.871192  |
| 22               | 6                | 0              | 2.655895                | -0.687352 | 0.675690  |
| 23               | 1                | 0              | 1.743965                | -1.221323 | 0.379782  |
| 24               | 6                | 0              | 3.796595                | -1.110660 | -0.247331 |
| 25               | 1                | 0              | 4.701083                | -0.569050 | 0.045903  |
| 26               | 6                | 0              | 4.053916                | -2.604150 | -0.133044 |
| 27               | 1                | 0              | 4.936123                | -2.855132 | -0.732459 |
| 28               | 1                | 0              | 4.218872                | -2.870400 | 0.914142  |
| 29               | 8                | 0              | 1.483630                | 1.059403  | 1.764903  |
| 30               | 1                | 0              | 0.643686                | 1.409563  | 1.423076  |
| 31               | 8                | 0              | 3.046891                | -1.053446 | 1.987472  |
| 32               | 1                | 0              | 2.426082                | -0.609540 | 2.575980  |
| 33               | 8                | 0              | 3.529361                | -0.776512 | -1.595544 |
| 34               | 1                | 0              | 2.803138                | -1.347930 | -1.874296 |
| 35               | 8                | 0              | 2.893166                | -3.235954 | -0.660242 |
| 36               | 1                | 0              | 3.013434                | -4.185868 | -0.629585 |
| 37               | 6                | 0              | -1.266478               | 3.296614  | -0.154639 |
| 38               | 1                | 0              | -1.321015               | 3.745858  | -1.161672 |
| 39               | 1                | 0              | -2.226276               | 2.810475  | 0.038579  |
| 40               | 6                | 0              | -1.012252               | 4.375714  | 0.887610  |
| 41               | 1                | 0              | -1.850110               | 5.073572  | 0.921144  |
| 42               | 1                | 0              | -0.895222               | 3.925634  | 1.875429  |
| 43               | 1                | 0              | -0.111094               | 4.948838  | 0.660608  |
| 44               | 8                | 0              | -4.610140               | -2.235557 | 0.788671  |
| 45               | 6                | 0              | -5.840128               | -2.337445 | 0.103620  |
| 46               | 1                | 0              | -5.698324               | -2.726972 | -0.909701 |
| 47               | 1                | 0              | -6.447438               | -3.033918 | 0.677017  |
| 48               | 1                | 0              | -6.347716               | -1.368582 | 0.053638  |

-----

**Structure 31b (<sup>2</sup>E ax-ec) (M06-2X, Gas Phase)**

Energy (Hartrees): = - 1130.6600729  
 No imaginary frequencies

Standard orientation:

| Center Number | Atomic Number | Atomic Type | Coordinates (Angstroms) |           |           |
|---------------|---------------|-------------|-------------------------|-----------|-----------|
|               |               |             | X                       | Y         | Z         |
| 1             | 6             | 0           | 2.214545                | -0.204907 | -0.668117 |
| 2             | 6             | 0           | 2.440505                | 1.015939  | -0.030601 |
| 3             | 6             | 0           | 3.724341                | 1.414012  | 0.294242  |
| 4             | 6             | 0           | 4.814942                | 0.597558  | -0.019762 |
| 5             | 6             | 0           | 4.603490                | -0.616181 | -0.673059 |
| 6             | 6             | 0           | 3.304028                | -0.999645 | -0.994583 |
| 7             | 1             | 0           | 1.599199                | 1.653060  | 0.213900  |
| 8             | 1             | 0           | 3.917906                | 2.357169  | 0.789621  |
| 9             | 1             | 0           | 5.429184                | -1.262074 | -0.937763 |
| 10            | 1             | 0           | 3.138931                | -1.949999 | -1.491688 |
| 11            | 6             | 0           | 0.827630                | -0.704581 | -0.958149 |
| 12            | 1             | 0           | 0.835623                | -1.270689 | -1.899273 |
| 13            | 7             | 0           | 0.233248                | -1.569132 | 0.049160  |
| 14            | 8             | 0           | -0.076357               | 0.396853  | -1.116717 |
| 15            | 6             | 0           | -1.403070               | -0.091344 | -0.881862 |
| 16            | 6             | 0           | -1.173547               | -1.534222 | -0.363842 |
| 17            | 1             | 0           | -1.834785               | -1.812221 | 0.452874  |
| 18            | 1             | 0           | -1.332932               | -2.246472 | -1.175539 |
| 19            | 1             | 0           | -1.953957               | -0.081283 | -1.826292 |
| 20            | 6             | 0           | -2.059460               | 0.862656  | 0.120482  |
| 21            | 1             | 0           | -1.755094               | 0.587385  | 1.141759  |
| 22            | 6             | 0           | -3.584388               | 0.916605  | 0.074272  |
| 23            | 1             | 0           | -3.885074               | 1.204872  | -0.942900 |
| 24            | 6             | 0           | -4.274665               | -0.398165 | 0.427274  |
| 25            | 1             | 0           | -3.873117               | -0.773066 | 1.374663  |
| 26            | 6             | 0           | -5.776243               | -0.213814 | 0.570320  |
| 27            | 1             | 0           | -6.213504               | -1.148005 | 0.940298  |
| 28            | 1             | 0           | -5.983889               | 0.604388  | 1.262582  |
| 29            | 8             | 0           | -1.655640               | 2.199752  | -0.140169 |
| 30            | 1             | 0           | -0.757114               | 2.154463  | -0.486095 |
| 31            | 8             | 0           | -4.021139               | 1.882543  | 1.011422  |
| 32            | 1             | 0           | -3.463298               | 2.656332  | 0.875952  |
| 33            | 8             | 0           | -4.014319               | -1.375433 | -0.566060 |
| 34            | 1             | 0           | -4.642759               | -1.194899 | -1.275946 |
| 35            | 8             | 0           | -6.247474               | 0.072320  | -0.742736 |
| 36            | 1             | 0           | -7.192497               | 0.227377  | -0.712299 |
| 37            | 6             | 0           | 0.449209                | -1.142513 | 1.444476  |
| 38            | 1             | 0           | 0.489971                | -0.048917 | 1.541406  |
| 39            | 1             | 0           | -0.424351               | -1.471785 | 2.011981  |
| 40            | 6             | 0           | 1.691368                | -1.773958 | 2.063370  |
| 41            | 1             | 0           | 1.717650                | -1.569862 | 3.136469  |
| 42            | 1             | 0           | 1.665983                | -2.854521 | 1.912173  |
| 43            | 1             | 0           | 2.610422                | -1.385911 | 1.623720  |
| 44            | 8             | 0           | 6.032275                | 1.074174  | 0.340795  |
| 45            | 6             | 0           | 7.159450                | 0.269422  | 0.066152  |
| 46            | 1             | 0           | 8.019663                | 0.816760  | 0.444470  |
| 47            | 1             | 0           | 7.089600                | -0.697115 | 0.575738  |
| 48            | 1             | 0           | 7.277931                | 0.106075  | -1.009887 |

**Structure 31b (<sup>2</sup>E ec-ec H-bond O) (M06-2X, Benzene)**

Energy (Hartrees): = - 1130.6869115  
 No imaginary frequencies

Standard orientation:

| Center Number | Atomic Number | Atomic Type | Coordinates (Angstroms) |           |           |
|---------------|---------------|-------------|-------------------------|-----------|-----------|
|               |               |             | X                       | Y         | Z         |
| 1             | 6             | 0           | -2.188272               | 0.334010  | -0.575416 |
| 2             | 6             | 0           | -2.162746               | -0.706960 | 0.359610  |
| 3             | 6             | 0           | -3.335101               | -1.291623 | 0.791982  |
| 4             | 6             | 0           | -4.569047               | -0.840342 | 0.302687  |
| 5             | 6             | 0           | -4.608596               | 0.198259  | -0.623542 |
| 6             | 6             | 0           | -3.411108               | 0.771092  | -1.057177 |
| 7             | 1             | 0           | -1.209668               | -1.053664 | 0.746251  |
| 8             | 1             | 0           | -3.333717               | -2.101954 | 1.510963  |
| 9             | 1             | 0           | -5.547609               | 0.564362  | -1.016634 |
| 10            | 1             | 0           | -3.443446               | 1.575786  | -1.785312 |
| 11            | 6             | 0           | -0.897865               | 0.966978  | -1.021956 |
| 12            | 1             | 0           | -1.100558               | 1.702795  | -1.822417 |
| 13            | 7             | 0           | -0.161936               | 1.577601  | 0.075105  |
| 14            | 8             | 0           | -0.007175               | -0.016801 | -1.537370 |
| 15            | 6             | 0           | 1.325672                | 0.241440  | -1.061270 |

|    |   |   |           |           |           |
|----|---|---|-----------|-----------|-----------|
| 16 | 6 | 0 | 1.213377  | 1.613154  | -0.405978 |
| 17 | 1 | 0 | 1.920000  | 1.745615  | 0.410936  |
| 18 | 1 | 0 | 1.375028  | 2.414456  | -1.146081 |
| 19 | 1 | 0 | 1.996979  | 0.230983  | -1.920146 |
| 20 | 6 | 0 | 1.691420  | -0.867387 | -0.061537 |
| 21 | 1 | 0 | 1.330107  | -0.573755 | 0.935434  |
| 22 | 6 | 0 | 3.179070  | -1.200192 | 0.034024  |
| 23 | 1 | 0 | 3.533437  | -1.481733 | -0.967769 |
| 24 | 6 | 0 | 4.049882  | -0.057793 | 0.554077  |
| 25 | 1 | 0 | 3.617151  | 0.331843  | 1.481221  |
| 26 | 6 | 0 | 5.470658  | -0.515777 | 0.833571  |
| 27 | 1 | 0 | 6.020674  | 0.308836  | 1.301167  |
| 28 | 1 | 0 | 5.463842  | -1.381752 | 1.498783  |
| 29 | 8 | 0 | 1.077876  | -2.092278 | -0.439801 |
| 30 | 1 | 0 | 0.256534  | -1.857522 | -0.890245 |
| 31 | 8 | 0 | 3.330921  | -2.285581 | 0.931691  |
| 32 | 1 | 0 | 2.651641  | -2.925081 | 0.689976  |
| 33 | 8 | 0 | 4.080155  | 1.006432  | -0.385338 |
| 34 | 1 | 0 | 4.739399  | 0.749785  | -1.042258 |
| 35 | 8 | 0 | 6.029643  | -0.831687 | -0.437976 |
| 36 | 1 | 0 | 6.944088  | -1.096781 | -0.318129 |
| 37 | 6 | 0 | -0.706980 | 2.865912  | 0.478097  |
| 38 | 1 | 0 | -0.651136 | 3.588041  | -0.356406 |
| 39 | 1 | 0 | -1.765287 | 2.717589  | 0.709591  |
| 40 | 6 | 0 | 0.008396  | 3.426027  | 1.697756  |
| 41 | 1 | 0 | -0.490798 | 4.332268  | 2.046104  |
| 42 | 1 | 0 | 0.001524  | 2.691996  | 2.506369  |
| 43 | 1 | 0 | 1.045794  | 3.683643  | 1.472991  |
| 44 | 8 | 0 | -5.660626 | -1.477408 | 0.789293  |
| 45 | 6 | 0 | -6.929361 | -1.058885 | 0.324293  |
| 46 | 1 | 0 | -7.658962 | -1.686540 | 0.832117  |
| 47 | 1 | 0 | -7.120120 | -0.010631 | 0.575456  |
| 48 | 1 | 0 | -7.024088 | -1.200682 | -0.757016 |

### Structure 31b (<sup>2</sup>E ec-ec H-bond N) (M06-2X, Benzene)

Energy (Hartrees): = - 1130.6897073  
No imaginary frequencies

Standard orientation:

| Center<br>Number | Atomic<br>Number | Atomic<br>Type | Coordinates (Angstroms) |           |           |
|------------------|------------------|----------------|-------------------------|-----------|-----------|
|                  |                  |                | X                       | Y         | Z         |
| 1                | 6                | 0              | -1.609826               | 0.244372  | -0.604462 |
| 2                | 6                | 0              | -1.443316               | -0.553765 | 0.532625  |
| 3                | 6                | 0              | -2.461821               | -1.378033 | 0.965617  |
| 4                | 6                | 0              | -3.677829               | -1.421969 | 0.270210  |
| 5                | 6                | 0              | -3.855101               | -0.634037 | -0.863936 |
| 6                | 6                | 0              | -2.812378               | 0.189924  | -1.290902 |
| 7                | 1                | 0              | -0.502861               | -0.523908 | 1.072066  |
| 8                | 1                | 0              | -2.349133               | -2.006735 | 1.840551  |
| 9                | 1                | 0              | -4.780883               | -0.653724 | -1.422402 |
| 10               | 1                | 0              | -2.950331               | 0.797241  | -2.180298 |
| 11               | 6                | 0              | -0.505666               | 1.162462  | -1.051147 |
| 12               | 1                | 0              | -0.746818               | 1.574162  | -2.048590 |
| 13               | 7                | 0              | -0.256114               | 2.258467  | -0.108725 |
| 14               | 8                | 0              | 0.732641                | 0.479887  | -1.115275 |
| 15               | 6                | 0              | 1.781175                | 1.347152  | -0.657538 |
| 16               | 6                | 0              | 1.087063                | 2.699242  | -0.489204 |
| 17               | 1                | 0              | 1.543514                | 3.308939  | 0.291791  |
| 18               | 1                | 0              | 1.074855                | 3.262908  | -1.434981 |
| 19               | 1                | 0              | 2.567719                | 1.366120  | -1.408985 |
| 20               | 6                | 0              | 2.352476                | 0.822226  | 0.660573  |
| 21               | 1                | 0              | 3.282551                | 1.369222  | 0.869077  |
| 22               | 6                | 0              | 2.664105                | -0.678541 | 0.665367  |
| 23               | 1                | 0              | 1.760597                | -1.219584 | 0.357282  |
| 24               | 6                | 0              | 3.819904                | -1.087676 | -0.245849 |
| 25               | 1                | 0              | 4.713647                | -0.528523 | 0.047355  |
| 26               | 6                | 0              | 4.106952                | -2.574666 | -0.126837 |
| 27               | 1                | 0              | 4.991992                | -2.810899 | -0.728216 |
| 28               | 1                | 0              | 4.288288                | -2.837518 | 0.918730  |
| 29               | 8                | 0              | 1.468734                | 1.049685  | 1.759156  |
| 30               | 1                | 0              | 0.631433                | 1.406427  | 1.413745  |
| 31               | 8                | 0              | 3.039113                | -1.047972 | 1.982856  |
| 32               | 1                | 0              | 2.401619                | -0.612904 | 2.560750  |
| 33               | 8                | 0              | 3.552896                | -0.765086 | -1.598952 |
| 34               | 1                | 0              | 2.838276                | -1.351806 | -1.876255 |
| 35               | 8                | 0              | 2.958551                | -3.237592 | -0.643626 |
| 36               | 1                | 0              | 3.121153                | -4.183188 | -0.641419 |
| 37               | 6                | 0              | -1.283606               | 3.293678  | -0.135745 |
| 38               | 1                | 0              | -1.354789               | 3.732541  | -1.145571 |
| 39               | 1                | 0              | -2.239505               | 2.809340  | 0.079574  |
| 40               | 6                | 0              | -1.016080               | 4.383690  | 0.889982  |
| 41               | 1                | 0              | -1.857076               | 5.078633  | 0.927319  |
| 42               | 1                | 0              | -0.884502               | 3.947974  | 1.883111  |

|    |   |   |           |           |           |
|----|---|---|-----------|-----------|-----------|
| 43 | 1 | 0 | -0.121643 | 4.960120  | 0.643695  |
| 44 | 8 | 0 | -4.613799 | -2.259582 | 0.776291  |
| 45 | 6 | 0 | -5.848484 | -2.356913 | 0.092429  |
| 46 | 1 | 0 | -5.709830 | -2.729098 | -0.927863 |
| 47 | 1 | 0 | -6.448849 | -3.069486 | 0.654722  |
| 48 | 1 | 0 | -6.367143 | -1.393123 | 0.065180  |

### Structure 31b (<sup>2</sup>E ax-ec) (M06-2X, Benzene)

Energy (Hartrees): = - 1130.6804868

No imaginary frequencies

Standard orientation:

| Center<br>Number | Atomic<br>Number | Atomic<br>Type | Coordinates (Angstroms) |           |           |
|------------------|------------------|----------------|-------------------------|-----------|-----------|
|                  |                  |                | X                       | Y         | Z         |
| 1                | 6                | 0              | 2.219162                | -0.202479 | -0.649732 |
| 2                | 6                | 0              | 2.452101                | 1.012290  | -0.002607 |
| 3                | 6                | 0              | 3.740345                | 1.409936  | 0.307788  |
| 4                | 6                | 0              | 4.828651                | 0.598323  | -0.028580 |
| 5                | 6                | 0              | 4.609161                | -0.612474 | -0.686041 |
| 6                | 6                | 0              | 3.306046                | -0.995109 | -0.993480 |
| 7                | 1                | 0              | 1.615054                | 1.648773  | 0.258768  |
| 8                | 1                | 0              | 3.935628                | 2.350495  | 0.808394  |
| 9                | 1                | 0              | 5.432679                | -1.255776 | -0.964592 |
| 10               | 1                | 0              | 3.136832                | -1.940995 | -1.498105 |
| 11               | 6                | 0              | 0.829566                | -0.698281 | -0.936955 |
| 12               | 1                | 0              | 0.833776                | -1.257503 | -1.881974 |
| 13               | 7                | 0              | 0.232903                | -1.569226 | 0.064510  |
| 14               | 8                | 0              | -0.073481               | 0.406358  | -1.083785 |
| 15               | 6                | 0              | -1.401914               | -0.086469 | -0.863366 |
| 16               | 6                | 0              | -1.173831               | -1.532038 | -0.352611 |
| 17               | 1                | 0              | -1.835363               | -1.811691 | 0.463487  |
| 18               | 1                | 0              | -1.329654               | -2.239889 | -1.168787 |
| 19               | 1                | 0              | -1.943562               | -0.070638 | -1.813031 |
| 20               | 6                | 0              | -2.068397               | 0.857540  | 0.142477  |
| 21               | 1                | 0              | -1.775385               | 0.569755  | 1.163262  |
| 22               | 6                | 0              | -3.592932               | 0.917457  | 0.080915  |
| 23               | 1                | 0              | -3.880813               | 1.225037  | -0.934143 |
| 24               | 6                | 0              | -4.293065               | -0.400390 | 0.404387  |
| 25               | 1                | 0              | -3.908966               | -0.789858 | 1.352842  |
| 26               | 6                | 0              | -5.796970               | -0.221115 | 0.522201  |
| 27               | 1                | 0              | -6.238486               | -1.166140 | 0.857823  |
| 28               | 1                | 0              | -6.027755               | 0.572470  | 1.235987  |
| 29               | 8                | 0              | -1.656628               | 2.197683  | -0.098985 |
| 30               | 1                | 0              | -0.745539               | 2.151437  | -0.411532 |
| 31               | 8                | 0              | -4.035084               | 1.872364  | 1.029474  |
| 32               | 1                | 0              | -3.474012               | 2.646441  | 0.908342  |
| 33               | 8                | 0              | -4.016245               | -1.363453 | -0.599961 |
| 34               | 1                | 0              | -4.628735               | -1.165004 | -1.319524 |
| 35               | 8                | 0              | -6.248319               | 0.104031  | -0.789201 |
| 36               | 1                | 0              | -7.207374               | 0.138762  | -0.787956 |
| 37               | 6                | 0              | 0.446287                | -1.152734 | 1.463859  |
| 38               | 1                | 0              | 0.494168                | -0.060231 | 1.567581  |
| 39               | 1                | 0              | -0.429845               | -1.480929 | 2.027797  |
| 40               | 6                | 0              | 1.682588                | -1.795607 | 2.080241  |
| 41               | 1                | 0              | 1.711170                | -1.594279 | 3.154398  |
| 42               | 1                | 0              | 1.650734                | -2.876833 | 1.929709  |
| 43               | 1                | 0              | 2.606696                | -1.415393 | 1.643168  |
| 44               | 8                | 0              | 6.049609                | 1.073631  | 0.313719  |
| 45               | 6                | 0              | 7.176101                | 0.273739  | 0.007284  |
| 46               | 1                | 0              | 8.043586                | 0.824552  | 0.365460  |
| 47               | 1                | 0              | 7.127037                | -0.693341 | 0.517851  |
| 48               | 1                | 0              | 7.271602                | 0.114890  | -1.071561 |

### Structure 31b (<sup>2</sup>E ec-ec H-bond O) (M06-2X, DMSO)

Energy (Hartrees): = - 1130.6910847

No imaginary frequencies

Standard orientation:

| Center<br>Number | Atomic<br>Number | Atomic<br>Type | Coordinates (Angstroms) |           |           |
|------------------|------------------|----------------|-------------------------|-----------|-----------|
|                  |                  |                | X                       | Y         | Z         |
| 1                | 6                | 0              | -2.193136               | 0.330415  | -0.569085 |
| 2                | 6                | 0              | -2.171520               | -0.701456 | 0.376545  |
| 3                | 6                | 0              | -3.346048               | -1.283592 | 0.810652  |
| 4                | 6                | 0              | -4.579512               | -0.838995 | 0.311028  |
| 5                | 6                | 0              | -4.614688               | 0.188594  | -0.629676 |
| 6                | 6                | 0              | -3.415622               | 0.760577  | -1.061514 |
| 7                | 1                | 0              | -1.221483               | -1.046320 | 0.773492  |
| 8                | 1                | 0              | -3.341983               | -2.085215 | 1.540107  |
| 9                | 1                | 0              | -5.552201               | 0.550584  | -1.030794 |

|    |   |   |           |           |           |
|----|---|---|-----------|-----------|-----------|
| 10 | 1 | 0 | -3.445682 | 1.560082  | -1.795557 |
| 11 | 6 | 0 | -0.901607 | 0.960914  | -1.016669 |
| 12 | 1 | 0 | -1.101914 | 1.697607  | -1.814631 |
| 13 | 7 | 0 | -0.162080 | 1.568194  | 0.081440  |
| 14 | 8 | 0 | -0.016863 | -0.031262 | -1.531283 |
| 15 | 6 | 0 | 1.321585  | 0.227946  | -1.066277 |
| 16 | 6 | 0 | 1.213960  | 1.597096  | -0.405658 |
| 17 | 1 | 0 | 1.921081  | 1.725516  | 0.411653  |
| 18 | 1 | 0 | 1.370940  | 2.399720  | -1.143997 |
| 19 | 1 | 0 | 1.985567  | 0.220904  | -1.930978 |
| 20 | 6 | 0 | 1.696524  | -0.885809 | -0.077647 |
| 21 | 1 | 0 | 1.327396  | -0.609247 | 0.921094  |
| 22 | 6 | 0 | 3.186790  | -1.200553 | 0.024928  |
| 23 | 1 | 0 | 3.546978  | -1.479628 | -0.975513 |
| 24 | 6 | 0 | 4.040647  | -0.042532 | 0.540112  |
| 25 | 1 | 0 | 3.584454  | 0.370097  | 1.445442  |
| 26 | 6 | 0 | 5.458447  | -0.477824 | 0.863738  |
| 27 | 1 | 0 | 5.991213  | 0.370957  | 1.305222  |
| 28 | 1 | 0 | 5.451189  | -1.310596 | 1.570315  |
| 29 | 8 | 0 | 1.099024  | -2.114639 | -0.476551 |
| 30 | 1 | 0 | 0.252753  | -1.880642 | -0.878902 |
| 31 | 8 | 0 | 3.345314  | -2.286818 | 0.924277  |
| 32 | 1 | 0 | 2.668224  | -2.928989 | 0.682193  |
| 33 | 8 | 0 | 4.084443  | 0.995570  | -0.429382 |
| 34 | 1 | 0 | 4.751607  | 0.715048  | -1.069235 |
| 35 | 8 | 0 | 6.050305  | -0.849566 | -0.378621 |
| 36 | 1 | 0 | 6.997940  | -0.944911 | -0.246265 |
| 37 | 6 | 0 | -0.695122 | 2.871594  | 0.462419  |
| 38 | 1 | 0 | -0.623946 | 3.576966  | -0.383208 |
| 39 | 1 | 0 | -1.757418 | 2.741868  | 0.688473  |
| 40 | 6 | 0 | 0.019638  | 3.441678  | 1.677448  |
| 41 | 1 | 0 | -0.466029 | 4.364961  | 1.999638  |
| 42 | 1 | 0 | -0.009466 | 2.728078  | 2.504410  |
| 43 | 1 | 0 | 1.064317  | 3.672687  | 1.457141  |
| 44 | 8 | 0 | -5.672865 | -1.467143 | 0.800759  |
| 45 | 6 | 0 | -6.943354 | -1.036889 | 0.333902  |
| 46 | 1 | 0 | -7.677780 | -1.648416 | 0.853911  |
| 47 | 1 | 0 | -7.115941 | 0.016878  | 0.571426  |
| 48 | 1 | 0 | -7.042015 | -1.191460 | -0.744585 |

### Structure 31b (<sup>2</sup>E ec-ec H-bond N) (M06-2X, DMSO)

Energy (Hartrees): = - 1130.6968331

No imaginary frequencies

Standard orientation:

| Center Number | Atomic Number | Atomic Type | Coordinates (Angstroms) |           |           |
|---------------|---------------|-------------|-------------------------|-----------|-----------|
|               |               |             | X                       | Y         | Z         |
| 1             | 6             | 0           | -1.649929               | 0.237151  | -0.608984 |
| 2             | 6             | 0           | -1.419259               | -0.673046 | 0.429125  |
| 3             | 6             | 0           | -2.410111               | -1.549703 | 0.827848  |
| 4             | 6             | 0           | -3.662723               | -1.534323 | 0.197670  |
| 5             | 6             | 0           | -3.903141               | -0.634413 | -0.839510 |
| 6             | 6             | 0           | -2.888348               | 0.239184  | -1.234043 |
| 7             | 1             | 0           | -0.453307               | -0.688364 | 0.922954  |
| 8             | 1             | 0           | -2.243852               | -2.261540 | 1.628109  |
| 9             | 1             | 0           | -4.857937               | -0.604861 | -1.346855 |
| 10            | 1             | 0           | -3.076554               | 0.935271  | -2.045818 |
| 11            | 6             | 0           | -0.579066               | 1.211308  | -1.019072 |
| 12            | 1             | 0           | -0.850668               | 1.678274  | -1.981631 |
| 13            | 7             | 0           | -0.334176               | 2.252940  | -0.015039 |
| 14            | 8             | 0           | 0.674327                | 0.559432  | -1.151043 |
| 15            | 6             | 0           | 1.710337                | 1.415321  | -0.643084 |
| 16            | 6             | 0           | 0.995122                | 2.741814  | -0.396497 |
| 17            | 1             | 0           | 1.453906                | 3.321902  | 0.405002  |
| 18            | 1             | 0           | 0.952154                | 3.349681  | -1.312041 |
| 19            | 1             | 0           | 2.498163                | 1.491441  | -1.391072 |
| 20            | 6             | 0           | 2.289250                | 0.827662  | 0.644110  |
| 21            | 1             | 0           | 3.184176                | 1.407149  | 0.906712  |
| 22            | 6             | 0           | 2.683449                | -0.641075 | 0.507483  |
| 23            | 1             | 0           | 1.810126                | -1.189014 | 0.127834  |
| 24            | 6             | 0           | 3.852460                | -0.894445 | -0.446005 |
| 25            | 1             | 0           | 4.627337                | -0.133421 | -0.308456 |
| 26            | 6             | 0           | 4.463107                | -2.267374 | -0.192718 |
| 27            | 1             | 0           | 5.124469                | -2.508955 | -1.026894 |
| 28            | 1             | 0           | 5.052562                | -2.254091 | 0.727976  |
| 29            | 8             | 0           | 1.376325                | 0.904669  | 1.737808  |
| 30            | 1             | 0           | 0.553235                | 1.320476  | 1.418489  |
| 31            | 8             | 0           | 3.040220                | -1.149210 | 1.788242  |
| 32            | 1             | 0           | 2.368883                | -0.807667 | 2.392710  |
| 33            | 8             | 0           | 3.410477                | -0.771630 | -1.790445 |
| 34            | 1             | 0           | 2.673264                | -1.384382 | -1.899637 |
| 35            | 8             | 0           | 3.463628                | -3.276570 | -0.146641 |
| 36            | 1             | 0           | 3.011942                | -3.155813 | 0.696733  |
| 37            | 6             | 0           | -1.377417               | 3.276004  | 0.014537  |



|    |   |   |           |           |           |
|----|---|---|-----------|-----------|-----------|
| 38 | 1 | 0 | -1.466878 | 3.748878  | -0.976763 |
| 39 | 1 | 0 | -2.325089 | 2.773645  | 0.225676  |
| 40 | 6 | 0 | -1.105037 | 4.330020  | 1.075010  |
| 41 | 1 | 0 | -1.952159 | 5.015317  | 1.143311  |
| 42 | 1 | 0 | -0.959461 | 3.863177  | 2.052530  |
| 43 | 1 | 0 | -0.217339 | 4.919926  | 0.836392  |
| 44 | 8 | 0 | -4.567246 | -2.426776 | 0.661470  |
| 45 | 6 | 0 | -5.858949 | -2.420941 | 0.070516  |
| 46 | 1 | 0 | -5.808940 | -2.657792 | -0.996304 |
| 47 | 1 | 0 | -6.427233 | -3.193840 | 0.584033  |
| 48 | 1 | 0 | -6.351875 | -1.454173 | 0.208828  |

-----

**Structure 31b (<sup>2</sup>E ax-ec) (M06-2X, DMSO)**

Energy (Hartrees): = - 1130.685572  
 No imaginary frequencies

Standard orientation:

| Center<br>Number | Atomic<br>Number | Atomic<br>Type | Coordinates (Angstroms) |           |           |
|------------------|------------------|----------------|-------------------------|-----------|-----------|
|                  |                  |                | X                       | Y         | Z         |
| 1                | 6                | 0              | 2.222164                | -0.201964 | -0.663906 |
| 2                | 6                | 0              | 2.458063                | 1.020692  | -0.031989 |
| 3                | 6                | 0              | 3.747354                | 1.408978  | 0.291170  |
| 4                | 6                | 0              | 4.832751                | 0.579785  | -0.015661 |
| 5                | 6                | 0              | 4.609677                | -0.637299 | -0.662882 |
| 6                | 6                | 0              | 3.306441                | -1.009592 | -0.984015 |
| 7                | 1                | 0              | 1.626268                | 1.671215  | 0.212569  |
| 8                | 1                | 0              | 3.940889                | 2.355999  | 0.781514  |
| 9                | 1                | 0              | 5.430471                | -1.292121 | -0.923076 |
| 10               | 1                | 0              | 3.135671                | -1.958963 | -1.482418 |
| 11               | 6                | 0              | 0.833030                | -0.698818 | -0.950803 |
| 12               | 1                | 0              | 0.841646                | -1.278678 | -1.882634 |
| 13               | 7                | 0              | 0.234458                | -1.550466 | 0.069554  |
| 14               | 8                | 0              | -0.068534               | 0.402604  | -1.121149 |
| 15               | 6                | 0              | -1.398833               | -0.087933 | -0.894043 |
| 16               | 6                | 0              | -1.171761               | -1.523618 | -0.358889 |
| 17               | 1                | 0              | -1.834917               | -1.788051 | 0.460984  |
| 18               | 1                | 0              | -1.315887               | -2.242915 | -1.167093 |
| 19               | 1                | 0              | -1.939879               | -0.087889 | -1.843889 |
| 20               | 6                | 0              | -2.066617               | 0.869417  | 0.096440  |
| 21               | 1                | 0              | -1.758753               | 0.610287  | 1.119578  |
| 22               | 6                | 0              | -3.591487               | 0.905882  | 0.055340  |
| 23               | 1                | 0              | -3.898685               | 1.198755  | -0.958564 |
| 24               | 6                | 0              | -4.261594               | -0.423818 | 0.397062  |
| 25               | 1                | 0              | -3.823684               | -0.827404 | 1.315594  |
| 26               | 6                | 0              | -5.758515               | -0.272859 | 0.597133  |
| 27               | 1                | 0              | -6.165786               | -1.239712 | 0.910618  |
| 28               | 1                | 0              | -5.968564               | 0.476910  | 1.362990  |
| 29               | 8                | 0              | -1.676162               | 2.209920  | -0.186446 |
| 30               | 1                | 0              | -0.737034               | 2.176776  | -0.405157 |
| 31               | 8                | 0              | -4.032458               | 1.868818  | 0.999781  |
| 32               | 1                | 0              | -3.468570               | 2.640272  | 0.871685  |
| 33               | 8                | 0              | -4.025498               | -1.364443 | -0.641151 |
| 34               | 1                | 0              | -4.663098               | -1.141644 | -1.331977 |
| 35               | 8                | 0              | -6.290774               | 0.108736  | -0.668846 |
| 36               | 1                | 0              | -7.244961               | -0.007525 | -0.642821 |
| 37               | 6                | 0              | 0.428000                | -1.082665 | 1.458011  |
| 38               | 1                | 0              | 0.464004                | 0.012639  | 1.522004  |
| 39               | 1                | 0              | -0.451765               | -1.397992 | 2.022865  |
| 40               | 6                | 0              | 1.662774                | -1.690071 | 2.112276  |
| 41               | 1                | 0              | 1.676736                | -1.443712 | 3.177410  |
| 42               | 1                | 0              | 1.641216                | -2.778131 | 2.012142  |
| 43               | 1                | 0              | 2.590985                | -1.323612 | 1.670063  |
| 44               | 8                | 0              | 6.052898                | 1.042938  | 0.340464  |
| 45               | 6                | 0              | 7.177261                | 0.224438  | 0.050486  |
| 46               | 1                | 0              | 8.046821                | 0.767501  | 0.415042  |
| 47               | 1                | 0              | 7.108011                | -0.738072 | 0.565863  |
| 48               | 1                | 0              | 7.279637                | 0.057419  | -1.025791 |

-----

**Structure 31c (<sup>5</sup>C<sub>2</sub> ec-ec) (M06-2X, Gas Phase)**

Energy (Hartrees): = - 1130.6661793  
 No imaginary frequencies

Standard orientation:

| Center<br>Number | Atomic<br>Number | Atomic<br>Type | Coordinates (Angstroms) |          |           |
|------------------|------------------|----------------|-------------------------|----------|-----------|
|                  |                  |                | X                       | Y        | Z         |
| 1                | 6                | 0              | -1.988884               | 1.538262 | 0.216174  |
| 2                | 6                | 0              | -0.926067               | 2.453742 | -0.384206 |
| 3                | 6                | 0              | -1.787250               | 0.137041 | -0.360505 |
| 4                | 1                | 0              | -1.030234               | 3.437896 | 0.071122  |

|    |   |   |           |           |           |
|----|---|---|-----------|-----------|-----------|
| 5  | 1 | 0 | -1.069742 | 2.553455  | -1.475616 |
| 6  | 1 | 0 | -2.989809 | 1.894521  | -0.019354 |
| 7  | 1 | 0 | -1.913042 | 0.156499  | -1.454598 |
| 8  | 8 | 0 | -0.450066 | -0.266474 | -0.060580 |
| 9  | 7 | 0 | 0.403174  | 1.920453  | -0.069387 |
| 10 | 6 | 0 | -2.682882 | -0.948293 | 0.235447  |
| 11 | 1 | 0 | -2.745270 | -0.777303 | 1.317667  |
| 12 | 6 | 0 | -4.081777 | -0.940169 | -0.360646 |
| 13 | 1 | 0 | -3.997616 | -1.135556 | -1.439758 |
| 14 | 6 | 0 | -4.940030 | -2.031705 | 0.252060  |
| 15 | 1 | 0 | -4.961508 | -1.893495 | 1.340255  |
| 16 | 1 | 0 | -4.523654 | -3.012794 | 0.012288  |
| 17 | 8 | 0 | -2.155161 | -2.229066 | -0.052369 |
| 18 | 1 | 0 | -1.201849 | -2.162859 | 0.069186  |
| 19 | 8 | 0 | -4.676840 | 0.319986  | -0.128351 |
| 20 | 1 | 0 | -5.618581 | 0.196366  | -0.292137 |
| 21 | 8 | 0 | -6.237922 | -1.851718 | -0.306167 |
| 22 | 1 | 0 | -6.856639 | -2.419863 | 0.155034  |
| 23 | 8 | 0 | -1.862400 | 1.526376  | 1.622425  |
| 24 | 1 | 0 | -0.923202 | 1.386687  | 1.793464  |
| 25 | 6 | 0 | 1.469369  | 2.809396  | -0.538553 |
| 26 | 1 | 0 | 1.418008  | 2.930487  | -1.635970 |
| 27 | 1 | 0 | 2.422906  | 2.330469  | -0.314474 |
| 28 | 6 | 0 | 1.872227  | -0.044227 | -0.312079 |
| 29 | 6 | 0 | 2.246983  | -0.227269 | 1.022855  |
| 30 | 6 | 0 | 2.742028  | -0.441818 | -1.312801 |
| 31 | 6 | 0 | 3.466664  | -0.789108 | 1.339385  |
| 32 | 1 | 0 | 1.566474  | 0.082234  | 1.807476  |
| 33 | 6 | 0 | 3.981016  | -1.009259 | -1.010996 |
| 34 | 1 | 0 | 2.461380  | -0.308590 | -2.352431 |
| 35 | 6 | 0 | 4.344671  | -1.182462 | 0.321380  |
| 36 | 1 | 0 | 3.776361  | -0.939498 | 2.366022  |
| 37 | 1 | 0 | 4.637786  | -1.308122 | -1.816084 |
| 38 | 6 | 0 | 0.535998  | 0.572337  | -0.626631 |
| 39 | 1 | 0 | 0.384105  | 0.599650  | -1.725325 |
| 40 | 6 | 0 | 1.437529  | 4.175319  | 0.136382  |
| 41 | 1 | 0 | 2.362266  | 4.712914  | -0.079131 |
| 42 | 1 | 0 | 0.609629  | 4.796582  | -0.206843 |
| 43 | 1 | 0 | 1.352979  | 4.052021  | 1.218186  |
| 44 | 8 | 0 | 5.519187  | -1.719484 | 0.734409  |
| 45 | 6 | 0 | 6.447508  | -2.107286 | -0.256307 |
| 46 | 1 | 0 | 7.313170  | -2.493266 | 0.276803  |
| 47 | 1 | 0 | 6.037183  | -2.892293 | -0.899628 |
| 48 | 1 | 0 | 6.749669  | -1.253293 | -0.871132 |

-----

### Structure 31c (<sup>5</sup>C<sub>2</sub> ax-ec) (M06-2X, Gas Phase)

Energy (Hartrees): = - 1130.6633565  
 No imaginary frequencies

Standard orientation:

| Center Number | Atomic Number | Atomic Type | Coordinates (Angstroms) |           |           |
|---------------|---------------|-------------|-------------------------|-----------|-----------|
|               |               |             | X                       | Y         | Z         |
| 1             | 6             | 0           | 2.009853                | 1.647880  | 0.143797  |
| 2             | 6             | 0           | 0.876427                | 2.403650  | 0.853083  |
| 3             | 6             | 0           | 1.823433                | 0.153988  | 0.417881  |
| 4             | 1             | 0           | 0.933709                | 3.465835  | 0.611950  |
| 5             | 1             | 0           | 1.003567                | 2.298605  | 1.937370  |
| 6             | 1             | 0           | 2.982077                | 1.971569  | 0.513474  |
| 7             | 1             | 0           | 1.884104                | -0.037289 | 1.500150  |
| 8             | 8             | 0           | 0.512797                | -0.211054 | -0.032313 |
| 9             | 7             | 0           | -0.456956               | 1.902696  | 0.498577  |
| 10            | 6             | 0           | 2.789083                | -0.788784 | -0.299032 |
| 11            | 1             | 0           | 2.901487                | -0.456153 | -1.339335 |
| 12            | 6             | 0           | 4.161377                | -0.825943 | 0.355849  |
| 13            | 1             | 0           | 4.040068                | -1.156658 | 1.398009  |
| 14            | 6             | 0           | 5.071927                | -1.815362 | -0.349361 |
| 15            | 1             | 0           | 5.128712                | -1.547117 | -1.411856 |
| 16            | 1             | 0           | 4.675121                | -2.827651 | -0.244730 |
| 17            | 8             | 0           | 2.295614                | -2.113424 | -0.237826 |
| 18            | 1             | 0           | 1.339195                | -2.051627 | -0.335983 |
| 19            | 8             | 0           | 4.730625                | 0.465420  | 0.305230  |
| 20            | 1             | 0           | 5.669334                | 0.343716  | 0.487157  |
| 21            | 8             | 0           | 6.342156                | -1.672474 | 0.277520  |
| 22            | 1             | 0           | 6.992825                | -2.170634 | -0.219484 |
| 23            | 8             | 0           | 1.998033                | 1.900090  | -1.250831 |
| 24            | 1             | 0           | 1.264927                | 1.397511  | -1.621367 |
| 25            | 6             | 0           | -0.960815               | 2.357274  | -0.811196 |
| 26            | 1             | 0           | -0.886180               | 1.559209  | -1.563393 |
| 27            | 1             | 0           | -0.309715               | 3.161691  | -1.157008 |
| 28            | 6             | 0           | -1.838472               | -0.137731 | 0.401609  |
| 29            | 6             | 0           | -2.066524               | -0.865003 | -0.765984 |
| 30            | 6             | 0           | -2.892377               | 0.062132  | 1.282840  |
| 31            | 6             | 0           | -3.326906               | -1.362057 | -1.050147 |

|    |   |   |           |           |           |
|----|---|---|-----------|-----------|-----------|
| 32 | 1 | 0 | -1.248255 | -1.038461 | -1.454144 |
| 33 | 6 | 0 | -4.164684 | -0.432681 | 1.014173  |
| 34 | 1 | 0 | -2.724145 | 0.635024  | 2.188944  |
| 35 | 6 | 0 | -4.385003 | -1.146596 | -0.164062 |
| 36 | 1 | 0 | -3.524465 | -1.926116 | -1.953105 |
| 37 | 1 | 0 | -4.963025 | -0.258396 | 1.722232  |
| 38 | 6 | 0 | -0.498790 | 0.474947  | 0.718023  |
| 39 | 1 | 0 | -0.272750 | 0.313084  | 1.781897  |
| 40 | 6 | 0 | -2.398270 | 2.862842  | -0.745821 |
| 41 | 1 | 0 | -2.685114 | 3.305548  | -1.702967 |
| 42 | 1 | 0 | -3.097349 | 2.057494  | -0.519140 |
| 43 | 1 | 0 | -2.487300 | 3.624127  | 0.031529  |
| 44 | 8 | 0 | -5.580078 | -1.673256 | -0.530434 |
| 45 | 6 | 0 | -6.680497 | -1.467242 | 0.330047  |
| 46 | 1 | 0 | -6.891659 | -0.400271 | 0.455114  |
| 47 | 1 | 0 | -7.529742 | -1.950324 | -0.147380 |
| 48 | 1 | 0 | -6.508493 | -1.921900 | 1.311060  |

### Structure 31c (<sup>5</sup>C<sub>2</sub> ec-ec) (M06-2X, Benzene)

Energy (Hartrees): = - 1130.6876936

No imaginary frequencies

Standard orientation:

| Center<br>Number | Atomic<br>Number | Atomic<br>Type | Coordinates (Angstroms) |           |           |
|------------------|------------------|----------------|-------------------------|-----------|-----------|
|                  |                  |                | X                       | Y         | Z         |
| 1                | 6                | 0              | -1.991015               | 1.543262  | 0.208350  |
| 2                | 6                | 0              | -0.930266               | 2.457505  | -0.396747 |
| 3                | 6                | 0              | -1.784665               | 0.139875  | -0.359824 |
| 4                | 1                | 0              | -1.036673               | 3.445491  | 0.049928  |
| 5                | 1                | 0              | -1.075737               | 2.547549  | -1.487996 |
| 6                | 1                | 0              | -2.991445               | 1.897645  | -0.032200 |
| 7                | 1                | 0              | -1.905833               | 0.156470  | -1.454238 |
| 8                | 8                | 0              | -0.447194               | -0.257687 | -0.052162 |
| 9                | 7                | 0              | 0.401625                | 1.931289  | -0.078446 |
| 10               | 6                | 0              | -2.677756               | -0.950476 | 0.231267  |
| 11               | 1                | 0              | -2.732177               | -0.797526 | 1.316454  |
| 12               | 6                | 0              | -4.083628               | -0.935187 | -0.349553 |
| 13               | 1                | 0              | -4.012595               | -1.074881 | -1.438417 |
| 14               | 6                | 0              | -4.923672               | -2.064605 | 0.219001  |
| 15               | 1                | 0              | -4.930374               | -1.989494 | 1.313592  |
| 16               | 1                | 0              | -4.510030               | -3.030612 | -0.079897 |
| 17               | 8                | 0              | -2.146524               | -2.226811 | -0.077439 |
| 18               | 1                | 0              | -1.192411               | -2.154954 | 0.038731  |
| 19               | 8                | 0              | -4.692511               | 0.305209  | -0.047865 |
| 20               | 1                | 0              | -5.636596               | 0.170066  | -0.191665 |
| 21               | 8                | 0              | -6.232768               | -1.867699 | -0.308365 |
| 22               | 1                | 0              | -6.841238               | -2.448527 | 0.153768  |
| 23               | 8                | 0              | -1.867886               | 1.540277  | 1.616786  |
| 24               | 1                | 0              | -0.927785               | 1.403844  | 1.788775  |
| 25               | 6                | 0              | 1.461696                | 2.823175  | -0.560014 |
| 26               | 1                | 0              | 1.399046                | 2.940957  | -1.656659 |
| 27               | 1                | 0              | 2.419379                | 2.349133  | -0.343381 |
| 28               | 6                | 0              | 1.876139                | -0.034921 | -0.306045 |
| 29               | 6                | 0              | 2.260316                | -0.195912 | 1.029375  |
| 30               | 6                | 0              | 2.738282                | -0.453119 | -1.306284 |
| 31               | 6                | 0              | 3.479892                | -0.759088 | 1.346721  |
| 32               | 1                | 0              | 1.590100                | 0.131466  | 1.816153  |
| 33               | 6                | 0              | 3.975997                | -1.022848 | -1.003635 |
| 34               | 1                | 0              | 2.452236                | -0.334442 | -2.346432 |
| 35               | 6                | 0              | 4.348187                | -1.177046 | 0.329420  |
| 36               | 1                | 0              | 3.793706                | -0.891774 | 2.375033  |
| 37               | 1                | 0              | 4.626446                | -1.337619 | -1.808206 |
| 38               | 6                | 0              | 0.539361                | 0.579493  | -0.625986 |
| 39               | 1                | 0              | 0.387284                | 0.596471  | -1.723714 |
| 40               | 6                | 0              | 1.433623                | 4.189765  | 0.111870  |
| 41               | 1                | 0              | 2.353572                | 4.730525  | -0.119286 |
| 42               | 1                | 0              | 0.599013                | 4.809059  | -0.219888 |
| 43               | 1                | 0              | 1.368439                | 4.071177  | 1.196152  |
| 44               | 8                | 0              | 5.520257                | -1.715419 | 0.741371  |
| 45               | 6                | 0              | 6.427115                | -2.156718 | -0.251457 |
| 46               | 1                | 0              | 7.290578                | -2.548378 | 0.282659  |
| 47               | 1                | 0              | 5.990757                | -2.952456 | -0.863316 |
| 48               | 1                | 0              | 6.746355                | -1.330114 | -0.894199 |

### Structure 31c (<sup>5</sup>C<sub>2</sub> ax-ec) (M06-2X, Benzene)

Energy (Hartrees): = - 1130.6843437

No imaginary frequencies

Standard orientation:

| Center<br>Number | Atomic<br>Number | Atomic<br>Type | Coordinates (Angstroms) |           |           |
|------------------|------------------|----------------|-------------------------|-----------|-----------|
|                  |                  |                | X                       | Y         | Z         |
| 1                | 6                | 0              | 2.014323                | 1.645797  | 0.168558  |
| 2                | 6                | 0              | 0.880599                | 2.402663  | 0.876050  |
| 3                | 6                | 0              | 1.820192                | 0.151629  | 0.432465  |
| 4                | 1                | 0              | 0.943839                | 3.466346  | 0.642446  |
| 5                | 1                | 0              | 1.004416                | 2.289013  | 1.959652  |
| 6                | 1                | 0              | 2.983938                | 1.965781  | 0.548588  |
| 7                | 1                | 0              | 1.874796                | -0.044171 | 1.513874  |
| 8                | 8                | 0              | 0.509643                | -0.203955 | -0.026517 |
| 9                | 7                | 0              | -0.454149               | 1.909931  | 0.513116  |
| 10               | 6                | 0              | 2.779297                | -0.798200 | -0.284072 |
| 11               | 1                | 0              | 2.872221                | -0.486898 | -1.332689 |
| 12               | 6                | 0              | 4.164999                | -0.823271 | 0.343672  |
| 13               | 1                | 0              | 4.065786                | -1.107772 | 1.401726  |
| 14               | 6                | 0              | 5.054981                | -1.846464 | -0.339766 |
| 15               | 1                | 0              | 5.092315                | -1.625991 | -1.413945 |
| 16               | 1                | 0              | 4.660363                | -2.853520 | -0.186391 |
| 17               | 8                | 0              | 2.283960                | -2.122257 | -0.191572 |
| 18               | 1                | 0              | 1.327953                | -2.058925 | -0.297375 |
| 19               | 8                | 0              | 4.744667                | 0.460874  | 0.227064  |
| 20               | 1                | 0              | 5.686867                | 0.334158  | 0.389430  |
| 21               | 8                | 0              | 6.340147                | -1.688420 | 0.253591  |
| 22               | 1                | 0              | 6.979752                | -2.188602 | -0.258336 |
| 23               | 8                | 0              | 2.015306                | 1.907010  | -1.226235 |
| 24               | 1                | 0              | 1.278416                | 1.414453  | -1.604123 |
| 25               | 6                | 0              | -0.952861               | 2.376013  | -0.794779 |
| 26               | 1                | 0              | -0.873380               | 1.587205  | -1.555933 |
| 27               | 1                | 0              | -0.304828               | 3.188063  | -1.128643 |
| 28               | 6                | 0              | -1.842333               | -0.129062 | 0.397793  |
| 29               | 6                | 0              | -2.078731               | -0.802832 | -0.800730 |
| 30               | 6                | 0              | -2.888986               | 0.021104  | 1.298289  |
| 31               | 6                | 0              | -3.338566               | -1.296160 | -1.094848 |
| 32               | 1                | 0              | -1.268714               | -0.939647 | -1.507087 |
| 33               | 6                | 0              | -4.160406               | -0.472082 | 1.020558  |
| 34               | 1                | 0              | -2.717126               | 0.549194  | 2.230870  |
| 35               | 6                | 0              | -4.388854               | -1.132912 | -0.187233 |
| 36               | 1                | 0              | -3.537006               | -1.820004 | -2.022090 |
| 37               | 1                | 0              | -4.952351               | -0.339235 | 1.745140  |
| 38               | 6                | 0              | -0.503263               | 0.479881  | 0.725196  |
| 39               | 1                | 0              | -0.282877               | 0.311707  | 1.788573  |
| 40               | 6                | 0              | -2.390450               | 2.878913  | -0.730016 |
| 41               | 1                | 0              | -2.681190               | 3.312279  | -1.690901 |
| 42               | 1                | 0              | -3.090382               | 2.076089  | -0.494699 |
| 43               | 1                | 0              | -2.481665               | 3.649334  | 0.038868  |
| 44               | 8                | 0              | -5.582548               | -1.652143 | -0.561702 |
| 45               | 6                | 0              | -6.669647               | -1.517529 | 0.334018  |
| 46               | 1                | 0              | -6.901159               | -0.465020 | 0.526229  |
| 47               | 1                | 0              | -7.520919               | -1.987885 | -0.154169 |
| 48               | 1                | 0              | -6.471183               | -2.029271 | 1.281214  |

### Structure 31c (<sup>5</sup>C<sub>2</sub> ec-ec) (M06-2X, DMSO)

Energy (Hartrees): = - 1130.6922954

No imaginary frequencies

Standard orientation:

| Center<br>Number | Atomic<br>Number | Atomic<br>Type | Coordinates (Angstroms) |           |           |
|------------------|------------------|----------------|-------------------------|-----------|-----------|
|                  |                  |                | X                       | Y         | Z         |
| 1                | 6                | 0              | -1.985904               | 1.546052  | 0.210328  |
| 2                | 6                | 0              | -0.925010               | 2.456433  | -0.397358 |
| 3                | 6                | 0              | -1.785886               | 0.143882  | -0.360206 |
| 4                | 1                | 0              | -1.029637               | 3.448922  | 0.039929  |
| 5                | 1                | 0              | -1.069714               | 2.535963  | -1.488174 |
| 6                | 1                | 0              | -2.984353               | 1.906622  | -0.028770 |
| 7                | 1                | 0              | -1.904561               | 0.167394  | -1.453869 |
| 8                | 8                | 0              | -0.449315               | -0.259196 | -0.049884 |
| 9                | 7                | 0              | 0.407511                | 1.929251  | -0.075514 |
| 10               | 6                | 0              | -2.683158               | -0.946266 | 0.223836  |
| 11               | 1                | 0              | -2.731018               | -0.810692 | 1.311553  |
| 12               | 6                | 0              | -4.093520               | -0.917671 | -0.345571 |
| 13               | 1                | 0              | -4.030063               | -1.015405 | -1.439256 |
| 14               | 6                | 0              | -4.926274               | -2.067522 | 0.192238  |
| 15               | 1                | 0              | -4.924855               | -2.030500 | 1.288488  |
| 16               | 1                | 0              | -4.515096               | -3.023493 | -0.139905 |
| 17               | 8                | 0              | -2.155545               | -2.222664 | -0.101183 |
| 18               | 1                | 0              | -1.198802               | -2.142221 | -0.011066 |
| 19               | 8                | 0              | -4.707909               | 0.309774  | 0.005040  |
| 20               | 1                | 0              | -5.652822               | 0.167717  | -0.131737 |
| 21               | 8                | 0              | -6.241101               | -1.861287 | -0.317502 |
| 22               | 1                | 0              | -6.845750               | -2.434698 | 0.162592  |
| 23               | 8                | 0              | -1.859532               | 1.540275  | 1.622256  |
| 24               | 1                | 0              | -0.920127               | 1.386736  | 1.788206  |

|    |   |   |          |           |           |
|----|---|---|----------|-----------|-----------|
| 25 | 6 | 0 | 1.462855 | 2.819611  | -0.575636 |
| 26 | 1 | 0 | 1.375367 | 2.942403  | -1.668711 |
| 27 | 1 | 0 | 2.423929 | 2.341691  | -0.382014 |
| 28 | 6 | 0 | 1.874696 | -0.040757 | -0.302515 |
| 29 | 6 | 0 | 2.253198 | -0.210371 | 1.033685  |
| 30 | 6 | 0 | 2.742908 | -0.449984 | -1.302666 |
| 31 | 6 | 0 | 3.473376 | -0.774872 | 1.352900  |
| 32 | 1 | 0 | 1.580977 | 0.109230  | 1.822877  |
| 33 | 6 | 0 | 3.980781 | -1.019697 | -0.998590 |
| 34 | 1 | 0 | 2.462003 | -0.321475 | -2.343200 |
| 35 | 6 | 0 | 4.348580 | -1.182595 | 0.335983  |
| 36 | 1 | 0 | 3.779052 | -0.911832 | 2.383664  |
| 37 | 1 | 0 | 4.636284 | -1.325475 | -1.802886 |
| 38 | 6 | 0 | 0.540775 | 0.577274  | -0.626490 |
| 39 | 1 | 0 | 0.389542 | 0.595594  | -1.722163 |
| 40 | 6 | 0 | 1.455220 | 4.181730  | 0.105389  |
| 41 | 1 | 0 | 2.364192 | 4.726446  | -0.158303 |
| 42 | 1 | 0 | 0.605442 | 4.798429  | -0.190981 |
| 43 | 1 | 0 | 1.432275 | 4.058405  | 1.191354  |
| 44 | 8 | 0 | 5.520482 | -1.720059 | 0.746343  |
| 45 | 6 | 0 | 6.434344 | -2.146171 | -0.254371 |
| 46 | 1 | 0 | 7.298823 | -2.539529 | 0.276674  |
| 47 | 1 | 0 | 6.000710 | -2.934751 | -0.876112 |
| 48 | 1 | 0 | 6.747107 | -1.309435 | -0.885893 |

### Structure 31c (<sup>5</sup>C<sub>2</sub> ax-ec) (M06-2X, DMSO)

Energy (Hartrees): = - 1130.689393  
 No imaginary frequencies

Standard orientation:

| Center<br>Number | Atomic<br>Number | Atomic<br>Type | Coordinates (Angstroms) |           |           |
|------------------|------------------|----------------|-------------------------|-----------|-----------|
|                  |                  |                | X                       | Y         | Z         |
| 1                | 6                | 0              | 2.007215                | 1.645414  | 0.185087  |
| 2                | 6                | 0              | 0.868494                | 2.392703  | 0.892784  |
| 3                | 6                | 0              | 1.822103                | 0.150412  | 0.442859  |
| 4                | 1                | 0              | 0.924750                | 3.458184  | 0.664734  |
| 5                | 1                | 0              | 0.995632                | 2.269601  | 1.974321  |
| 6                | 1                | 0              | 2.970119                | 1.969853  | 0.578327  |
| 7                | 1                | 0              | 1.882045                | -0.044355 | 1.523394  |
| 8                | 8                | 0              | 0.511912                | -0.213224 | -0.013320 |
| 9                | 7                | 0              | -0.466099               | 1.894107  | 0.529485  |
| 10               | 6                | 0              | 2.783243                | -0.792734 | -0.278991 |
| 11               | 1                | 0              | 2.858550                | -0.494772 | -1.332583 |
| 12               | 6                | 0              | 4.177773                | -0.797631 | 0.329533  |
| 13               | 1                | 0              | 4.093095                | -1.040085 | 1.399066  |
| 14               | 6                | 0              | 5.061030                | -1.841481 | -0.330503 |
| 15               | 1                | 0              | 5.087859                | -1.656834 | -1.411349 |
| 16               | 1                | 0              | 4.671833                | -2.844695 | -0.142918 |
| 17               | 8                | 0              | 2.298070                | -2.121660 | -0.168354 |
| 18               | 1                | 0              | 1.341631                | -2.062355 | -0.277653 |
| 19               | 8                | 0              | 4.759247                | 0.482544  | 0.158136  |
| 20               | 1                | 0              | 5.703572                | 0.353587  | 0.310460  |
| 21               | 8                | 0              | 6.353561                | -1.668025 | 0.243900  |
| 22               | 1                | 0              | 6.989681                | -2.155708 | -0.287501 |
| 23               | 8                | 0              | 2.021066                | 1.916750  | -1.210076 |
| 24               | 1                | 0              | 1.286075                | 1.428523  | -1.599588 |
| 25               | 6                | 0              | -0.952767               | 2.346892  | -0.788907 |
| 26               | 1                | 0              | -0.837918               | 1.562866  | -1.549766 |
| 27               | 1                | 0              | -0.323102               | 3.179198  | -1.107044 |
| 28               | 6                | 0              | -1.838523               | -0.152474 | 0.413316  |
| 29               | 6                | 0              | -2.079817               | -0.797496 | -0.800514 |
| 30               | 6                | 0              | -2.883452               | -0.019600 | 1.319893  |
| 31               | 6                | 0              | -3.344507               | -1.274865 | -1.105187 |
| 32               | 1                | 0              | -1.273732               | -0.922359 | -1.513984 |
| 33               | 6                | 0              | -4.160116               | -0.494368 | 1.030882  |
| 34               | 1                | 0              | -2.707191               | 0.477984  | 2.268751  |
| 35               | 6                | 0              | -4.395943               | -1.120251 | -0.195377 |
| 36               | 1                | 0              | -3.542350               | -1.774961 | -2.046253 |
| 37               | 1                | 0              | -4.950539               | -0.372976 | 1.759647  |
| 38               | 6                | 0              | -0.502394               | 0.460385  | 0.743434  |
| 39               | 1                | 0              | -0.280344               | 0.295908  | 1.806276  |
| 40               | 6                | 0              | -2.403496               | 2.815403  | -0.754191 |
| 41               | 1                | 0              | -2.685604               | 3.231368  | -1.725353 |
| 42               | 1                | 0              | -3.091504               | 2.000416  | -0.522279 |
| 43               | 1                | 0              | -2.528640               | 3.594701  | 0.001784  |
| 44               | 8                | 0              | -5.595586               | -1.612671 | -0.582645 |
| 45               | 6                | 0              | -6.686810               | -1.465225 | 0.314463  |
| 46               | 1                | 0              | -6.889872               | -0.410287 | 0.521178  |
| 47               | 1                | 0              | -7.547162               | -1.906833 | -0.184383 |
| 48               | 1                | 0              | -6.502544               | -1.994924 | 1.253718  |

**Structure 31d ( $^5C_2$  ec-ax) (M06-2X, Gas Phase)**

Energy (Hartrees): = - 1130.6626018  
 No imaginary frequencies

Standard orientation:

| Center<br>Number | Atomic<br>Number | Atomic<br>Type | Coordinates (Angstroms) |           |           |
|------------------|------------------|----------------|-------------------------|-----------|-----------|
|                  |                  |                | X                       | Y         | Z         |
| 1                | 6                | 0              | -1.495975               | 1.358392  | -0.900204 |
| 2                | 6                | 0              | -0.127044               | 1.954426  | -1.240149 |
| 3                | 6                | 0              | -1.278193               | 0.215680  | 0.098056  |
| 4                | 1                | 0              | -0.272600               | 2.828205  | -1.878372 |
| 5                | 1                | 0              | 0.494513                | 1.222864  | -1.780141 |
| 6                | 1                | 0              | -1.996959               | 0.975939  | -1.787270 |
| 7                | 1                | 0              | -0.644814               | -0.557628 | -0.358276 |
| 8                | 8                | 0              | -0.614930               | 0.746907  | 1.255125  |
| 9                | 7                | 0              | 0.472174                | 2.386525  | 0.013822  |
| 10               | 6                | 0              | -2.560134               | -0.427046 | 0.630592  |
| 11               | 1                | 0              | -3.301198               | 0.366426  | 0.790275  |
| 12               | 6                | 0              | -3.125237               | -1.464815 | -0.325885 |
| 13               | 1                | 0              | -2.378323               | -2.262623 | -0.448169 |
| 14               | 6                | 0              | -4.396231               | -2.084802 | 0.225482  |
| 15               | 1                | 0              | -5.119260               | -1.285080 | 0.428872  |
| 16               | 1                | 0              | -4.177166               | -2.628904 | 1.147176  |
| 17               | 8                | 0              | -2.293605               | -1.125705 | 1.834918  |
| 18               | 1                | 0              | -1.745898               | -0.538842 | 2.366819  |
| 19               | 8                | 0              | -3.397974               | -0.845920 | -1.566660 |
| 20               | 1                | 0              | -3.964239               | -1.462101 | -2.044563 |
| 21               | 8                | 0              | -4.872816               | -2.947629 | -0.802460 |
| 22               | 1                | 0              | -5.747818               | -3.259314 | -0.566776 |
| 23               | 8                | 0              | -2.318735               | 2.360776  | -0.342826 |
| 24               | 1                | 0              | -1.788768               | 2.752766  | 0.362895  |
| 25               | 6                | 0              | 1.433510                | 3.477337  | -0.033638 |
| 26               | 1                | 0              | 2.044042                | 3.426683  | -0.946428 |
| 27               | 1                | 0              | 2.125553                | 3.370462  | 0.807271  |
| 28               | 6                | 0              | 1.649948                | 0.215780  | 0.590774  |
| 29               | 6                | 0              | 2.732874                | 0.461868  | -0.240997 |
| 30               | 6                | 0              | 1.521409                | -1.063080 | 1.147190  |
| 31               | 6                | 0              | 3.680484                | -0.524187 | -0.517596 |
| 32               | 1                | 0              | 2.855229                | 1.436577  | -0.697809 |
| 33               | 6                | 0              | 2.448537                | -2.051877 | 0.881615  |
| 34               | 1                | 0              | 0.662482                | -1.286697 | 1.770312  |
| 35               | 6                | 0              | 3.541026                | -1.787709 | 0.049777  |
| 36               | 1                | 0              | 4.508322                | -0.291788 | -1.173392 |
| 37               | 1                | 0              | 2.351561                | -3.045996 | 1.300144  |
| 38               | 6                | 0              | 0.652916                | 1.315059  | 0.967154  |
| 39               | 1                | 0              | 0.975455                | 1.769923  | 1.908510  |
| 40               | 6                | 0              | 0.735250                | 4.832443  | 0.037360  |
| 41               | 1                | 0              | 1.451288                | 5.651546  | -0.061700 |
| 42               | 1                | 0              | -0.004367               | 4.924841  | -0.761343 |
| 43               | 1                | 0              | 0.213467                | 4.935088  | 0.990581  |
| 44               | 8                | 0              | 4.397417                | -2.820883 | -0.148440 |
| 45               | 6                | 0              | 5.510977                | -2.596773 | -0.986507 |
| 46               | 1                | 0              | 6.061347                | -3.534303 | -1.013384 |
| 47               | 1                | 0              | 5.197056                | -2.330354 | -2.000949 |
| 48               | 1                | 0              | 6.156331                | -1.807918 | -0.586433 |

**Structure 31d ( $^5C_2$  ax-ax) (M06-2X, Gas Phase)**

Energy (Hartrees): = - 1130.666403  
 No imaginary frequencies

Standard orientation:

| Center<br>Number | Atomic<br>Number | Atomic<br>Type | Coordinates (Angstroms) |           |           |
|------------------|------------------|----------------|-------------------------|-----------|-----------|
|                  |                  |                | X                       | Y         | Z         |
| 1                | 6                | 0              | -1.505020               | 1.288957  | -1.079595 |
| 2                | 6                | 0              | -0.133149               | 1.843950  | -1.478206 |
| 3                | 6                | 0              | -1.275790               | 0.242752  | 0.010816  |
| 4                | 1                | 0              | -0.254758               | 2.644932  | -2.208468 |
| 5                | 1                | 0              | 0.453178                | 1.044903  | -1.946169 |
| 6                | 1                | 0              | -2.001069               | 0.828302  | -1.933084 |
| 7                | 1                | 0              | -0.636819               | -0.559519 | -0.379730 |
| 8                | 8                | 0              | -0.606395               | 0.898691  | 1.098729  |
| 9                | 7                | 0              | 0.623241                | 2.362792  | -0.333828 |
| 10               | 6                | 0              | -2.534843               | -0.375146 | 0.622651  |
| 11               | 1                | 0              | -3.292997               | 0.410075  | 0.742537  |
| 12               | 6                | 0              | -3.109652               | -1.487641 | -0.238655 |
| 13               | 1                | 0              | -2.349898               | -2.276554 | -0.338011 |
| 14               | 6                | 0              | -4.344190               | -2.095297 | 0.401963  |
| 15               | 1                | 0              | -5.077420               | -1.298981 | 0.580867  |
| 16               | 1                | 0              | -4.078134               | -2.571989 | 1.348358  |
| 17               | 8                | 0              | -2.222422               | -0.973298 | 1.868544  |

|    |   |   |           |           |           |
|----|---|---|-----------|-----------|-----------|
| 18 | 1 | 0 | -1.650882 | -0.348646 | 2.327909  |
| 19 | 8 | 0 | -3.442063 | -0.954534 | -1.503635 |
| 20 | 1 | 0 | -4.010090 | -1.611355 | -1.921707 |
| 21 | 8 | 0 | -4.838514 | -3.033972 | -0.547474 |
| 22 | 1 | 0 | -5.702442 | -3.337893 | -0.265044 |
| 23 | 8 | 0 | -2.354801 | 2.323501  | -0.612685 |
| 24 | 1 | 0 | -2.066790 | 2.535588  | 0.281195  |
| 25 | 6 | 0 | 0.271310  | 3.711999  | 0.122578  |
| 26 | 1 | 0 | -0.442405 | 3.681919  | 0.959833  |
| 27 | 1 | 0 | -0.234727 | 4.229415  | -0.693825 |
| 28 | 6 | 0 | 1.664867  | 0.267865  | 0.457634  |
| 29 | 6 | 0 | 2.781384  | 0.479925  | -0.337980 |
| 30 | 6 | 0 | 1.504017  | -0.981839 | 1.066191  |
| 31 | 6 | 0 | 3.730237  | -0.522237 | -0.537566 |
| 32 | 1 | 0 | 2.907092  | 1.446698  | -0.811791 |
| 33 | 6 | 0 | 2.434368  | -1.986066 | 0.874892  |
| 34 | 1 | 0 | 0.624651  | -1.174311 | 1.671465  |
| 35 | 6 | 0 | 3.557846  | -1.761873 | 0.073638  |
| 36 | 1 | 0 | 4.586644  | -0.320811 | -1.166504 |
| 37 | 1 | 0 | 2.317070  | -2.961033 | 1.331591  |
| 38 | 6 | 0 | 0.691272  | 1.403006  | 0.738728  |
| 39 | 1 | 0 | 1.019460  | 1.927462  | 1.639879  |
| 40 | 6 | 0 | 1.516606  | 4.483479  | 0.542924  |
| 41 | 1 | 0 | 1.256079  | 5.483101  | 0.897755  |
| 42 | 1 | 0 | 2.045778  | 3.967157  | 1.348183  |
| 43 | 1 | 0 | 2.200697  | 4.575044  | -0.302171 |
| 44 | 8 | 0 | 4.412753  | -2.808345 | -0.050643 |
| 45 | 6 | 0 | 5.559321  | -2.625160 | -0.853110 |
| 46 | 1 | 0 | 6.102496  | -3.566802 | -0.821690 |
| 47 | 1 | 0 | 5.287077  | -2.397104 | -1.888722 |
| 48 | 1 | 0 | 6.195555  | -1.825528 | -0.459960 |

### Structure 31d (<sup>5</sup>C<sub>2</sub> ec-ax) (M06-2X, Benzene)

Energy (Hartrees): = - 1130.683688  
 No imaginary frequencies

Standard orientation:

| Center Number | Atomic Number | Atomic Type | Coordinates (Angstroms) |           |           |
|---------------|---------------|-------------|-------------------------|-----------|-----------|
|               |               |             | X                       | Y         | Z         |
| 1             | 6             | 0           | -1.501092               | 1.361904  | -0.898850 |
| 2             | 6             | 0           | -0.136652               | 1.961851  | -1.245345 |
| 3             | 6             | 0           | -1.276467               | 0.217987  | 0.096938  |
| 4             | 1             | 0           | -0.286196               | 2.838067  | -1.879737 |
| 5             | 1             | 0           | 0.476861                | 1.231324  | -1.795153 |
| 6             | 1             | 0           | -2.003074               | 0.981541  | -1.786100 |
| 7             | 1             | 0           | -0.639405               | -0.551368 | -0.361294 |
| 8             | 8             | 0           | -0.614428               | 0.752290  | 1.252618  |
| 9             | 7             | 0           | 0.471247                | 2.391638  | 0.004970  |
| 10            | 6             | 0           | -2.555058               | -0.432783 | 0.629827  |
| 11            | 1             | 0           | -3.298242               | 0.356399  | 0.799629  |
| 12            | 6             | 0           | -3.124193               | -1.465845 | -0.330708 |
| 13            | 1             | 0           | -2.371496               | -2.254563 | -0.473642 |
| 14            | 6             | 0           | -4.383905               | -2.102827 | 0.227716  |
| 15            | 1             | 0           | -5.110305               | -1.313808 | 0.458855  |
| 16            | 1             | 0           | -4.152916               | -2.665899 | 1.135175  |
| 17            | 8             | 0           | -2.281069               | -1.135963 | 1.830888  |
| 18            | 1             | 0           | -1.707990               | -0.559898 | 2.348624  |
| 19            | 8             | 0           | -3.420970               | -0.836023 | -1.562146 |
| 20            | 1             | 0           | -4.001113               | -1.447770 | -2.030202 |
| 21            | 8             | 0           | -4.873079               | -2.951202 | -0.807313 |
| 22            | 1             | 0           | -5.754974               | -3.247486 | -0.571517 |
| 23            | 8             | 0           | -2.325671               | 2.362110  | -0.334790 |
| 24            | 1             | 0           | -1.785015               | 2.763669  | 0.358324  |
| 25            | 6             | 0           | 1.447235                | 3.471708  | -0.050279 |
| 26            | 1             | 0           | 2.031471                | 3.424364  | -0.979373 |
| 27            | 1             | 0           | 2.159690                | 3.342929  | 0.770000  |
| 28            | 6             | 0           | 1.654754                | 0.227130  | 0.596084  |
| 29            | 6             | 0           | 2.684422                | 0.434651  | -0.311180 |
| 30            | 6             | 0           | 1.582106                | -1.015372 | 1.238250  |
| 31            | 6             | 0           | 3.631208                | -0.554827 | -0.580526 |
| 32            | 1             | 0           | 2.764526                | 1.380317  | -0.833837 |
| 33            | 6             | 0           | 2.511279                | -2.005900 | 0.985142  |
| 34            | 1             | 0           | 0.767050                | -1.210914 | 1.926139  |
| 35            | 6             | 0           | 3.548088                | -1.781668 | 0.072758  |
| 36            | 1             | 0           | 4.414993                | -0.355856 | -1.298862 |
| 37            | 1             | 0           | 2.454399                | -2.970924 | 1.474208  |
| 38            | 6             | 0           | 0.653559                | 1.325724  | 0.962931  |
| 39            | 1             | 0           | 0.972462                | 1.785258  | 1.903027  |
| 40            | 6             | 0           | 0.770682                | 4.833877  | 0.058563  |
| 41            | 1             | 0           | 1.498930                | 5.643866  | -0.033174 |
| 42            | 1             | 0           | 0.023212                | 4.957078  | -0.729298 |
| 43            | 1             | 0           | 0.263903                | 4.927948  | 1.021565  |

|    |   |   |          |           |           |
|----|---|---|----------|-----------|-----------|
| 44 | 8 | 0 | 4.409302 | -2.810892 | -0.111767 |
| 45 | 6 | 0 | 5.441563 | -2.640105 | -1.064281 |
| 46 | 1 | 0 | 6.010220 | -3.567838 | -1.061652 |
| 47 | 1 | 0 | 5.032739 | -2.471555 | -2.065848 |
| 48 | 1 | 0 | 6.103698 | -1.811934 | -0.792795 |

### Structure 31d (<sup>5</sup>C<sub>2</sub> ax-ax) (M06-2X, Benece)

Energy (Hartrees): = - 1130.6872775

No imaginary frequencies

Standard orientation:

| Center<br>Number | Atomic<br>Number | Atomic<br>Type | Coordinates (Angstroms) |           |           |
|------------------|------------------|----------------|-------------------------|-----------|-----------|
|                  |                  |                | X                       | Y         | Z         |
| 1                | 6                | 0              | -1.509781               | 1.294047  | -1.076272 |
| 2                | 6                | 0              | -0.138325               | 1.847507  | -1.475747 |
| 3                | 6                | 0              | -1.281401               | 0.240658  | 0.007212  |
| 4                | 1                | 0              | -0.258989               | 2.651030  | -2.203434 |
| 5                | 1                | 0              | 0.440466                | 1.046908  | -1.950404 |
| 6                | 1                | 0              | -2.006566               | 0.840678  | -1.933203 |
| 7                | 1                | 0              | -0.648726               | -0.561877 | -0.392643 |
| 8                | 8                | 0              | -0.604445               | 0.886256  | 1.096173  |
| 9                | 7                | 0              | 0.623521                | 2.357553  | -0.331669 |
| 10               | 6                | 0              | -2.540346               | -0.376248 | 0.621833  |
| 11               | 1                | 0              | -3.293730               | 0.410681  | 0.757502  |
| 12               | 6                | 0              | -3.130653               | -1.476865 | -0.245354 |
| 13               | 1                | 0              | -2.371214               | -2.261208 | -0.376916 |
| 14               | 6                | 0              | -4.351354               | -2.097468 | 0.409735  |
| 15               | 1                | 0              | -5.078659               | -1.306103 | 0.630011  |
| 16               | 1                | 0              | -4.067382               | -2.602320 | 1.336228  |
| 17               | 8                | 0              | -2.220349               | -0.986221 | 1.861395  |
| 18               | 1                | 0              | -1.632229               | -0.372104 | 2.315311  |
| 19               | 8                | 0              | -3.493123               | -0.922749 | -1.494601 |
| 20               | 1                | 0              | -4.078317               | -1.570504 | -1.904493 |
| 21               | 8                | 0              | -4.874394               | -3.011845 | -0.548956 |
| 22               | 1                | 0              | -5.742787               | -3.299816 | -0.258783 |
| 23               | 8                | 0              | -2.358694               | 2.328250  | -0.602216 |
| 24               | 1                | 0              | -2.057056               | 2.547601  | 0.285992  |
| 25               | 6                | 0              | 0.290148                | 3.711166  | 0.128540  |
| 26               | 1                | 0              | -0.425385               | 3.691009  | 0.964645  |
| 27               | 1                | 0              | -0.202542               | 4.239815  | -0.688971 |
| 28               | 6                | 0              | 1.670011                | 0.261372  | 0.453843  |
| 29               | 6                | 0              | 2.793632                | 0.479463  | -0.331459 |
| 30               | 6                | 0              | 1.509245                | -0.992165 | 1.054756  |
| 31               | 6                | 0              | 3.746376                | -0.519588 | -0.529792 |
| 32               | 1                | 0              | 2.924609                | 1.447906  | -0.800711 |
| 33               | 6                | 0              | 2.443479                | -1.994092 | 0.865170  |
| 34               | 1                | 0              | 0.628021                | -1.190767 | 1.655320  |
| 35               | 6                | 0              | 3.572217                | -1.764225 | 0.071991  |
| 36               | 1                | 0              | 4.607659                | -0.312277 | -1.150515 |
| 37               | 1                | 0              | 2.322556                | -2.970790 | 1.318329  |
| 38               | 6                | 0              | 0.692876                | 1.394315  | 0.737153  |
| 39               | 1                | 0              | 1.020664                | 1.915430  | 1.639941  |
| 40               | 6                | 0              | 1.545152                | 4.463293  | 0.551533  |
| 41               | 1                | 0              | 1.297169                | 5.466811  | 0.905981  |
| 42               | 1                | 0              | 2.067690                | 3.941745  | 1.358390  |
| 43               | 1                | 0              | 2.231899                | 4.549080  | -0.293004 |
| 44               | 8                | 0              | 4.427454                | -2.807262 | -0.056652 |
| 45               | 6                | 0              | 5.574258                | -2.622468 | -0.864418 |
| 46               | 1                | 0              | 6.114625                | -3.566808 | -0.839785 |
| 47               | 1                | 0              | 5.301237                | -2.390275 | -1.898776 |
| 48               | 1                | 0              | 6.217553                | -1.830359 | -0.467816 |

### Structure 31d (<sup>5</sup>C<sub>2</sub> ec-ax) (M06-2X, DMSO)

Energy (Hartrees): = - 1130.6880513

No imaginary frequencies

Standard orientation:

| Center<br>Number | Atomic<br>Number | Atomic<br>Type | Coordinates (Angstroms) |           |           |
|------------------|------------------|----------------|-------------------------|-----------|-----------|
|                  |                  |                | X                       | Y         | Z         |
| 1                | 6                | 0              | -1.505480               | 1.339775  | -0.877922 |
| 2                | 6                | 0              | -0.148545               | 1.957702  | -1.217899 |
| 3                | 6                | 0              | -1.266988               | 0.184113  | 0.098271  |
| 4                | 1                | 0              | -0.303395               | 2.840817  | -1.841306 |
| 5                | 1                | 0              | 0.469491                | 1.240059  | -1.778269 |
| 6                | 1                | 0              | -2.004506               | 0.970079  | -1.771530 |
| 7                | 1                | 0              | -0.627921               | -0.572059 | -0.379623 |
| 8                | 8                | 0              | -0.602820               | 0.699614  | 1.261124  |
| 9                | 7                | 0              | 0.454796                | 2.377276  | 0.038507  |



|    |   |   |           |           |           |
|----|---|---|-----------|-----------|-----------|
| 10 | 6 | 0 | -2.524380 | -0.495927 | 0.636362  |
| 11 | 1 | 0 | -3.239713 | 0.280430  | 0.935759  |
| 12 | 6 | 0 | -3.190094 | -1.412182 | -0.379482 |
| 13 | 1 | 0 | -2.450205 | -2.142442 | -0.738707 |
| 14 | 6 | 0 | -4.351706 | -2.169795 | 0.240750  |
| 15 | 1 | 0 | -5.047106 | -1.453078 | 0.693845  |
| 16 | 1 | 0 | -3.993062 | -2.862176 | 1.005482  |
| 17 | 8 | 0 | -2.179269 | -1.316077 | 1.743567  |
| 18 | 1 | 0 | -1.562406 | -0.795333 | 2.271093  |
| 19 | 8 | 0 | -3.670368 | -0.627698 | -1.457105 |
| 20 | 1 | 0 | -4.316532 | -1.185990 | -1.906775 |
| 21 | 8 | 0 | -4.975130 | -2.864706 | -0.836892 |
| 22 | 1 | 0 | -5.839554 | -3.167141 | -0.543339 |
| 23 | 8 | 0 | -2.339485 | 2.325692  | -0.295369 |
| 24 | 1 | 0 | -1.784403 | 2.739991  | 0.379881  |
| 25 | 6 | 0 | 1.435827  | 3.456194  | -0.012444 |
| 26 | 1 | 0 | 2.021715  | 3.408526  | -0.939389 |
| 27 | 1 | 0 | 2.142379  | 3.324275  | 0.812013  |
| 28 | 6 | 0 | 1.674073  | 0.220398  | 0.592564  |
| 29 | 6 | 0 | 2.671345  | 0.435258  | -0.350216 |
| 30 | 6 | 0 | 1.653467  | -1.010615 | 1.260402  |
| 31 | 6 | 0 | 3.632670  | -0.537530 | -0.632604 |
| 32 | 1 | 0 | 2.715103  | 1.371941  | -0.892943 |
| 33 | 6 | 0 | 2.596445  | -1.986059 | 0.994141  |
| 34 | 1 | 0 | 0.878116  | -1.209150 | 1.992185  |
| 35 | 6 | 0 | 3.598706  | -1.755483 | 0.043621  |
| 36 | 1 | 0 | 4.390067  | -0.332023 | -1.377479 |
| 37 | 1 | 0 | 2.578490  | -2.939231 | 1.509714  |
| 38 | 6 | 0 | 0.657259  | 1.298626  | 0.977442  |
| 39 | 1 | 0 | 0.973278  | 1.746370  | 1.923648  |
| 40 | 6 | 0 | 0.760500  | 4.818278  | 0.095510  |
| 41 | 1 | 0 | 1.493808  | 5.625185  | 0.015770  |
| 42 | 1 | 0 | 0.025047  | 4.947438  | -0.703258 |
| 43 | 1 | 0 | 0.243438  | 4.909996  | 1.053714  |
| 44 | 8 | 0 | 4.479459  | -2.765126 | -0.150491 |
| 45 | 6 | 0 | 5.488661  | -2.571906 | -1.130704 |
| 46 | 1 | 0 | 6.079934  | -3.485286 | -1.138392 |
| 47 | 1 | 0 | 5.051715  | -2.415278 | -2.121548 |
| 48 | 1 | 0 | 6.132993  | -1.725529 | -0.875508 |

### Structure 31d (<sup>5</sup>C<sub>2</sub> ax-ax) (M06-2X, DMSO)

Energy (Hartrees): = - 1130.6911981

No imaginary frequencies

Standard orientation:

| Center<br>Number | Atomic<br>Number | Atomic<br>Type | Coordinates (Angstroms) |           |           |
|------------------|------------------|----------------|-------------------------|-----------|-----------|
|                  |                  |                | X                       | Y         | Z         |
| 1                | 6                | 0              | -1.507665               | 1.282041  | -1.079118 |
| 2                | 6                | 0              | -0.140720               | 1.847826  | -1.475037 |
| 3                | 6                | 0              | -1.274840               | 0.233656  | 0.007233  |
| 4                | 1                | 0              | -0.265334               | 2.651337  | -2.202212 |
| 5                | 1                | 0              | 0.439463                | 1.048884  | -1.951004 |
| 6                | 1                | 0              | -1.988835               | 0.819577  | -1.939878 |
| 7                | 1                | 0              | -0.640251               | -0.566454 | -0.394867 |
| 8                | 8                | 0              | -0.600161               | 0.882036  | 1.095412  |
| 9                | 7                | 0              | 0.620060                | 2.361863  | -0.331560 |
| 10               | 6                | 0              | -2.528073               | -0.390600 | 0.624708  |
| 11               | 1                | 0              | -3.277171               | 0.394482  | 0.789734  |
| 12               | 6                | 0              | -3.136634               | -1.473635 | -0.252464 |
| 13               | 1                | 0              | -2.375631               | -2.248213 | -0.427129 |
| 14               | 6                | 0              | -4.335776               | -2.117903 | 0.419462  |
| 15               | 1                | 0              | -5.064064               | -1.338854 | 0.675636  |
| 16               | 1                | 0              | -4.027494               | -2.641622 | 1.327327  |
| 17               | 8                | 0              | -2.189843               | -1.022961 | 1.850145  |
| 18               | 1                | 0              | -1.590593               | -0.417294 | 2.302577  |
| 19               | 8                | 0              | -3.540999               | -0.893853 | -1.479886 |
| 20               | 1                | 0              | -4.143477               | -1.534957 | -1.876993 |
| 21               | 8                | 0              | -4.876896               | -3.018229 | -0.543598 |
| 22               | 1                | 0              | -5.753385               | -3.284951 | -0.251320 |
| 23               | 8                | 0              | -2.378041               | 2.306496  | -0.618074 |
| 24               | 1                | 0              | -2.077134               | 2.551122  | 0.264872  |
| 25               | 6                | 0              | 0.267120                | 3.711360  | 0.132522  |
| 26               | 1                | 0              | -0.459906               | 3.680315  | 0.957377  |
| 27               | 1                | 0              | -0.213158               | 4.239776  | -0.692585 |
| 28               | 6                | 0              | 1.676279                | 0.268919  | 0.452181  |
| 29               | 6                | 0              | 2.794070                | 0.482949  | -0.344147 |
| 30               | 6                | 0              | 1.525477                | -0.981785 | 1.061918  |
| 31               | 6                | 0              | 3.748692                | -0.514593 | -0.544941 |
| 32               | 1                | 0              | 2.925792                | 1.447456  | -0.821344 |
| 33               | 6                | 0              | 2.461425                | -1.983401 | 0.871431  |
| 34               | 1                | 0              | 0.652142                | -1.180317 | 1.673910  |
| 35               | 6                | 0              | 3.583906                | -1.756966 | 0.066590  |
| 36               | 1                | 0              | 4.604525                | -0.308490 | -1.173981 |

|    |   |   |          |           |           |
|----|---|---|----------|-----------|-----------|
| 37 | 1 | 0 | 2.342846 | -2.955810 | 1.335643  |
| 38 | 6 | 0 | 0.694399 | 1.398256  | 0.737290  |
| 39 | 1 | 0 | 1.021343 | 1.919086  | 1.640172  |
| 40 | 6 | 0 | 1.507203 | 4.472039  | 0.581429  |
| 41 | 1 | 0 | 1.239471 | 5.469017  | 0.940331  |
| 42 | 1 | 0 | 2.020087 | 3.949159  | 1.393723  |
| 43 | 1 | 0 | 2.206993 | 4.577370  | -0.250780 |
| 44 | 8 | 0 | 4.443481 | -2.795022 | -0.060445 |
| 45 | 6 | 0 | 5.590136 | -2.603120 | -0.876386 |
| 46 | 1 | 0 | 6.138247 | -3.542710 | -0.849135 |
| 47 | 1 | 0 | 5.309799 | -2.376022 | -1.909083 |
| 48 | 1 | 0 | 6.224967 | -1.802925 | -0.484521 |

### Structure 34a (M06-2X, Gas Phase)

Energy (Hartrees): = - 1456.4568924  
No imaginary frequencies

Standard orientation:

| Center<br>Number | Atomic<br>Number | Atomic<br>Type | Coordinates (Angstroms) |           |           |
|------------------|------------------|----------------|-------------------------|-----------|-----------|
|                  |                  |                | X                       | Y         | Z         |
| 1                | 6                | 0              | -0.474891               | 1.436715  | 0.260376  |
| 2                | 6                | 0              | -1.429725               | 2.350944  | -0.184682 |
| 3                | 6                | 0              | -1.131534               | 3.704922  | -0.259782 |
| 4                | 6                | 0              | 0.129072                | 4.126542  | 0.129634  |
| 5                | 6                | 0              | 1.093427                | 3.250120  | 0.601895  |
| 6                | 6                | 0              | 0.778103                | 1.901060  | 0.665991  |
| 7                | 1                | 0              | -2.421454               | 2.002081  | -0.444584 |
| 8                | 1                | 0              | -1.855149               | 4.431791  | -0.602473 |
| 9                | 1                | 0              | 2.056016                | 3.631069  | 0.913658  |
| 10               | 1                | 0              | 1.516451                | 1.203497  | 1.046009  |
| 11               | 6                | 0              | -0.785006               | -0.055944 | 0.298613  |
| 12               | 1                | 0              | -0.368762               | -0.489595 | 1.212034  |
| 13               | 7                | 0              | -0.312477               | -0.814371 | -0.870313 |
| 14               | 8                | 0              | -2.174098               | -0.275082 | 0.283587  |
| 15               | 6                | 0              | -2.601044               | -0.628364 | -1.048531 |
| 16               | 6                | 0              | -1.324618               | -0.530768 | -1.887020 |
| 17               | 1                | 0              | -1.287382               | -1.287928 | -2.671477 |
| 18               | 1                | 0              | -1.204057               | 0.466377  | -2.333891 |
| 19               | 1                | 0              | -3.372301               | 0.075125  | -1.357606 |
| 20               | 6                | 0              | -3.182299               | -2.039914 | -1.035471 |
| 21               | 1                | 0              | -3.724569               | -2.197841 | -1.976777 |
| 22               | 6                | 0              | -4.145005               | -2.317601 | 0.123083  |
| 23               | 1                | 0              | -3.624762               | -2.105723 | 1.065220  |
| 24               | 6                | 0              | -5.434217               | -1.499596 | 0.075729  |
| 25               | 1                | 0              | -5.942770               | -1.702997 | -0.871638 |
| 26               | 6                | 0              | -6.353766               | -1.878764 | 1.225267  |
| 27               | 1                | 0              | -7.306243               | -1.351766 | 1.101997  |
| 28               | 1                | 0              | -6.515772               | -2.959492 | 1.227829  |
| 29               | 8                | 0              | -2.162045               | -3.032923 | -0.987817 |
| 30               | 1                | 0              | -1.359594               | -2.622178 | -0.632372 |
| 31               | 8                | 0              | -4.528840               | -3.678873 | 0.058672  |
| 32               | 1                | 0              | -3.715782               | -4.169436 | -0.106992 |
| 33               | 8                | 0              | -5.171873               | -0.109100 | 0.120508  |
| 34               | 1                | 0              | -4.866228               | 0.072436  | 1.017800  |
| 35               | 8                | 0              | -5.688344               | -1.443950 | 2.406083  |
| 36               | 1                | 0              | -6.252371               | -1.610685 | 3.162346  |
| 37               | 6                | 0              | 1.067401                | -0.641808 | -1.303594 |
| 38               | 1                | 0              | 1.156266                | -1.136546 | -2.275247 |
| 39               | 1                | 0              | 1.312110                | 0.419371  | -1.468311 |
| 40               | 6                | 0              | 2.065500                | -1.279432 | -0.342478 |
| 41               | 1                | 0              | 1.919170                | -0.898704 | 0.674238  |
| 42               | 1                | 0              | 1.868081                | -2.354982 | -0.296629 |
| 43               | 7                | 0              | 0.453564                | 5.566545  | 0.055234  |
| 44               | 8                | 0              | 1.559700                | 5.908062  | 0.410758  |
| 45               | 8                | 0              | -0.406161               | 6.311341  | -0.358601 |
| 46               | 6                | 0              | 3.508104                | -1.024909 | -0.771844 |
| 47               | 1                | 0              | 3.656932                | -1.410776 | -1.787526 |
| 48               | 1                | 0              | 3.687372                | 0.056105  | -0.824385 |
| 49               | 6                | 0              | 4.532841                | -1.660172 | 0.164603  |
| 50               | 1                | 0              | 4.399979                | -1.255568 | 1.175444  |
| 51               | 1                | 0              | 4.341241                | -2.737281 | 0.236128  |
| 52               | 6                | 0              | 5.973465                | -1.431311 | -0.286076 |
| 53               | 1                | 0              | 6.110191                | -1.855170 | -1.288276 |
| 54               | 1                | 0              | 6.158318                | -0.354320 | -0.379601 |
| 55               | 6                | 0              | 7.003107                | -2.038912 | 0.663086  |
| 56               | 1                | 0              | 6.812491                | -3.114065 | 0.766766  |
| 57               | 1                | 0              | 6.874860                | -1.606204 | 1.662869  |
| 58               | 6                | 0              | 8.443394                | -1.825016 | 0.202883  |
| 59               | 1                | 0              | 8.571298                | -2.263781 | -0.792618 |
| 60               | 1                | 0              | 8.630030                | -0.751313 | 0.092816  |
| 61               | 6                | 0              | 9.462524                | -2.428690 | 1.165849  |
| 62               | 1                | 0              | 10.485461               | -2.270120 | 0.819679  |

|    |   |   |          |           |          |
|----|---|---|----------|-----------|----------|
| 63 | 1 | 0 | 9.370726 | -1.981519 | 2.159075 |
| 64 | 1 | 0 | 9.306860 | -3.505498 | 1.271327 |

-----  
**Structure 34a (M06-2X, Benzene)**

Energy (Hartrees): = - 1456.4860408  
 No imaginary frequencies

Standard orientation:

| Center<br>Number | Atomic<br>Number | Atomic<br>Type | Coordinates (Angstroms) |           |           |
|------------------|------------------|----------------|-------------------------|-----------|-----------|
|                  |                  |                | X                       | Y         | Z         |
| 1                | 6                | 0              | -0.514424               | 1.493322  | 0.235970  |
| 2                | 6                | 0              | -1.451992               | 2.406064  | -0.248780 |
| 3                | 6                | 0              | -1.158454               | 3.761741  | -0.301369 |
| 4                | 6                | 0              | 0.081697                | 4.186811  | 0.148606  |
| 5                | 6                | 0              | 1.030141                | 3.310713  | 0.654260  |
| 6                | 6                | 0              | 0.718460                | 1.960047  | 0.697004  |
| 7                | 1                | 0              | -2.428250               | 2.056720  | -0.561542 |
| 8                | 1                | 0              | -1.874247               | 4.482539  | -0.672319 |
| 9                | 1                | 0              | 1.978964                | 3.687752  | 1.010440  |
| 10               | 1                | 0              | 1.442728                | 1.263724  | 1.104927  |
| 11               | 6                | 0              | -0.817089               | -0.001126 | 0.258161  |
| 12               | 1                | 0              | -0.401752               | -0.439739 | 1.169539  |
| 13               | 7                | 0              | -0.334699               | -0.745168 | -0.914658 |
| 14               | 8                | 0              | -2.208600               | -0.222881 | 0.232111  |
| 15               | 6                | 0              | -2.619080               | -0.618398 | -1.093937 |
| 16               | 6                | 0              | -1.348918               | -0.470060 | -1.932128 |
| 17               | 1                | 0              | -1.288376               | -1.210465 | -2.730866 |
| 18               | 1                | 0              | -1.256075               | 0.536664  | -2.362220 |
| 19               | 1                | 0              | -3.422682               | 0.043876  | -1.409933 |
| 20               | 6                | 0              | -3.131903               | -2.058829 | -1.067118 |
| 21               | 1                | 0              | -3.688975               | -2.240724 | -1.995275 |
| 22               | 6                | 0              | -4.045901               | -2.387093 | 0.118112  |
| 23               | 1                | 0              | -3.503871               | -2.155479 | 1.042991  |
| 24               | 6                | 0              | -5.376932               | -1.637519 | 0.124371  |
| 25               | 1                | 0              | -5.920968               | -1.880417 | -0.793530 |
| 26               | 6                | 0              | -6.220999               | -2.042849 | 1.321105  |
| 27               | 1                | 0              | -7.195275               | -1.547482 | 1.245548  |
| 28               | 1                | 0              | -6.356524               | -3.127754 | 1.333461  |
| 29               | 8                | 0              | -2.064621               | -3.004941 | -1.040629 |
| 30               | 1                | 0              | -1.267859               | -2.544370 | -0.730595 |
| 31               | 8                | 0              | -4.360667               | -3.768488 | 0.062276  |
| 32               | 1                | 0              | -3.525110               | -4.212185 | -0.124228 |
| 33               | 8                | 0              | -5.184585               | -0.233910 | 0.136177  |
| 34               | 1                | 0              | -4.786232               | -0.027411 | 0.990939  |
| 35               | 8                | 0              | -5.515330               | -1.589608 | 2.471255  |
| 36               | 1                | 0              | -6.065315               | -1.730431 | 3.244640  |
| 37               | 6                | 0              | 1.050192                | -0.571031 | -1.334912 |
| 38               | 1                | 0              | 1.144399                | -1.052258 | -2.312721 |
| 39               | 1                | 0              | 1.300234                | 0.491252  | -1.479855 |
| 40               | 6                | 0              | 2.033953                | -1.227933 | -0.371625 |
| 41               | 1                | 0              | 1.889946                | -0.844162 | 0.644298  |
| 42               | 1                | 0              | 1.816817                | -2.300187 | -0.329366 |
| 43               | 7                | 0              | 0.398313                | 5.627313  | 0.105371  |
| 44               | 8                | 0              | 1.489493                | 5.976329  | 0.501504  |
| 45               | 8                | 0              | -0.450480               | 6.377246  | -0.325305 |
| 46               | 6                | 0              | 3.482841                | -1.002467 | -0.796770 |
| 47               | 1                | 0              | 3.630281                | -1.406182 | -1.805771 |
| 48               | 1                | 0              | 3.680158                | 0.074545  | -0.862882 |
| 49               | 6                | 0              | 4.492467                | -1.640133 | 0.155091  |
| 50               | 1                | 0              | 4.367427                | -1.210071 | 1.156494  |
| 51               | 1                | 0              | 4.277339                | -2.711135 | 0.249051  |
| 52               | 6                | 0              | 5.938591                | -1.453695 | -0.298664 |
| 53               | 1                | 0              | 6.068700                | -1.913204 | -1.286078 |
| 54               | 1                | 0              | 6.143489                | -0.383767 | -0.426420 |
| 55               | 6                | 0              | 6.956102                | -2.048490 | 0.672226  |
| 56               | 1                | 0              | 6.740006                | -3.113885 | 0.818711  |
| 57               | 1                | 0              | 6.841815                | -1.572574 | 1.654087  |
| 58               | 6                | 0              | 8.400173                | -1.889923 | 0.200670  |
| 59               | 1                | 0              | 8.516058                | -2.379946 | -0.772365 |
| 60               | 1                | 0              | 8.611596                | -0.827226 | 0.038832  |
| 61               | 6                | 0              | 9.408656                | -2.468255 | 1.189128  |
| 62               | 1                | 0              | 10.433871               | -2.354252 | 0.830116  |
| 63               | 1                | 0              | 9.336356                | -1.967621 | 2.158703  |
| 64               | 1                | 0              | 9.228876                | -3.534511 | 1.352672  |

-----  
**Structure 34a (M06-2X, DMSO)**

Energy (Hartrees): = - 1456.4871681  
 No imaginary frequencies

Standard orientation:

| Center | Atomic | Atomic | Coordinates (Angstroms) |  |  |
|--------|--------|--------|-------------------------|--|--|
|--------|--------|--------|-------------------------|--|--|

| Number | Number | Type | X         | Y         | Z         |
|--------|--------|------|-----------|-----------|-----------|
| 1      | 6      | 0    | -0.459692 | 1.503537  | 0.284631  |
| 2      | 6      | 0    | -1.358721 | 2.416827  | -0.268802 |
| 3      | 6      | 0    | -1.043388 | 3.766602  | -0.336418 |
| 4      | 6      | 0    | 0.180617  | 4.183394  | 0.164758  |
| 5      | 6      | 0    | 1.092142  | 3.306117  | 0.734268  |
| 6      | 6      | 0    | 0.758194  | 1.961066  | 0.792942  |
| 7      | 1      | 0    | -2.319711 | 2.076678  | -0.634800 |
| 8      | 1      | 0    | -1.732808 | 4.483868  | -0.760618 |
| 9      | 1      | 0    | 2.032089  | 3.671418  | 1.125305  |
| 10     | 1      | 0    | 1.452235  | 1.261836  | 1.246431  |
| 11     | 6      | 0    | -0.783686 | 0.015502  | 0.326458  |
| 12     | 1      | 0    | -0.368911 | -0.416492 | 1.240519  |
| 13     | 7      | 0    | -0.313172 | -0.746972 | -0.839732 |
| 14     | 8      | 0    | -2.181360 | -0.187297 | 0.307663  |
| 15     | 6      | 0    | -2.598449 | -0.613171 | -1.006973 |
| 16     | 6      | 0    | -1.333813 | -0.483495 | -1.855272 |
| 17     | 1      | 0    | -1.279157 | -1.233596 | -2.645730 |
| 18     | 1      | 0    | -1.240168 | 0.515448  | -2.301395 |
| 19     | 1      | 0    | -3.403576 | 0.037003  | -1.341461 |
| 20     | 6      | 0    | -3.101464 | -2.053920 | -0.939629 |
| 21     | 1      | 0    | -3.570447 | -2.292734 | -1.903983 |
| 22     | 6      | 0    | -4.119949 | -2.318286 | 0.176374  |
| 23     | 1      | 0    | -3.709716 | -1.933211 | 1.117707  |
| 24     | 6      | 0    | -5.493695 | -1.693807 | -0.063916 |
| 25     | 1      | 0    | -5.889591 | -2.075763 | -1.009423 |
| 26     | 6      | 0    | -6.462148 | -2.039628 | 1.054079  |
| 27     | 1      | 0    | -7.452005 | -1.650453 | 0.794524  |
| 28     | 1      | 0    | -6.519469 | -3.122957 | 1.187194  |
| 29     | 8      | 0    | -2.027627 | -2.973586 | -0.740781 |
| 30     | 1      | 0    | -1.219100 | -2.457389 | -0.570841 |
| 31     | 8      | 0    | -4.324251 | -3.721056 | 0.266405  |
| 32     | 1      | 0    | -3.442023 | -4.104956 | 0.191167  |
| 33     | 8      | 0    | -5.408731 | -0.282207 | -0.182387 |
| 34     | 1      | 0    | -5.246664 | 0.041082  | 0.713190  |
| 35     | 8      | 0    | -5.962764 | -1.397246 | 2.225073  |
| 36     | 1      | 0    | -6.655531 | -1.403366 | 2.891516  |
| 37     | 6      | 0    | 1.068883  | -0.570601 | -1.273425 |
| 38     | 1      | 0    | 1.154315  | -1.049847 | -2.252745 |
| 39     | 1      | 0    | 1.312992  | 0.492807  | -1.417726 |
| 40     | 6      | 0    | 2.060896  | -1.224334 | -0.317971 |
| 41     | 1      | 0    | 1.910151  | -0.854568 | 0.701739  |
| 42     | 1      | 0    | 1.863453  | -2.301565 | -0.294966 |
| 43     | 7      | 0    | 0.519428  | 5.615075  | 0.103046  |
| 44     | 8      | 0    | 1.605421  | 5.960892  | 0.520210  |
| 45     | 8      | 0    | -0.304668 | 6.374273  | -0.363163 |
| 46     | 6      | 0    | 3.504555  | -0.968219 | -0.741668 |
| 47     | 1      | 0    | 3.640576  | -1.296926 | -1.779385 |
| 48     | 1      | 0    | 3.700364  | 0.111002  | -0.727856 |
| 49     | 6      | 0    | 4.521609  | -1.678011 | 0.148322  |
| 50     | 1      | 0    | 4.392538  | -1.343084 | 1.184838  |
| 51     | 1      | 0    | 4.317703  | -2.755645 | 0.140802  |
| 52     | 6      | 0    | 5.965269  | -1.436041 | -0.285483 |
| 53     | 1      | 0    | 6.089508  | -1.767770 | -1.323727 |
| 54     | 1      | 0    | 6.171298  | -0.358642 | -0.276062 |
| 55     | 6      | 0    | 6.985324  | -2.152317 | 0.595964  |
| 56     | 1      | 0    | 6.773845  | -3.228869 | 0.593495  |
| 57     | 1      | 0    | 6.869540  | -1.814899 | 1.633462  |
| 58     | 6      | 0    | 8.428301  | -1.924308 | 0.151658  |
| 59     | 1      | 0    | 8.542668  | -2.264595 | -0.883565 |
| 60     | 1      | 0    | 8.639406  | -0.849090 | 0.151448  |
| 61     | 6      | 0    | 9.437357  | -2.644505 | 1.041038  |
| 62     | 1      | 0    | 10.462398 | -2.480915 | 0.699713  |
| 63     | 1      | 0    | 9.368776  | -2.292200 | 2.074339  |
| 64     | 1      | 0    | 9.254234  | -3.722917 | 1.043928  |

### Structure 34b (M06-2X, Gas Phase)

Energy (Hartrees): = - 1456.461326  
 No imaginary frequencies

Standard orientation:

| Center Number | Atomic Number | Atomic Type | Coordinates (Angstroms) |          |           |
|---------------|---------------|-------------|-------------------------|----------|-----------|
|               |               |             | X                       | Y        | Z         |
| 1             | 6             | 0           | -1.156914               | 1.380958 | -0.931026 |
| 2             | 6             | 0           | -1.675892               | 1.529717 | 0.356014  |
| 3             | 6             | 0           | -1.879002               | 2.794898 | 0.882544  |
| 4             | 6             | 0           | -1.554596               | 3.895890 | 0.101170  |
| 5             | 6             | 0           | -1.042262               | 3.779807 | -1.179132 |
| 6             | 6             | 0           | -0.849041               | 2.502962 | -1.693145 |
| 7             | 1             | 0           | -1.920875               | 0.648085 | 0.937049  |
| 8             | 1             | 0           | -2.282204               | 2.945164 | 1.874440  |
| 9             | 1             | 0           | -0.810324               | 4.670531 | -1.746188 |

|    |   |   |           |           |           |
|----|---|---|-----------|-----------|-----------|
| 10 | 1 | 0 | -0.456979 | 2.381213  | -2.697008 |
| 11 | 6 | 0 | -0.917204 | -0.003660 | -1.479532 |
| 12 | 1 | 0 | -0.712880 | 0.058266  | -2.565008 |
| 13 | 7 | 0 | 0.183869  | -0.687373 | -0.797640 |
| 14 | 8 | 0 | -2.035467 | -0.829142 | -1.257190 |
| 15 | 6 | 0 | -1.592095 | -2.151527 | -0.909293 |
| 16 | 6 | 0 | -0.077494 | -2.092036 | -1.119392 |
| 17 | 1 | 0 | 0.463812  | -2.758618 | -0.446535 |
| 18 | 1 | 0 | 0.192709  | -2.324025 | -2.161524 |
| 19 | 1 | 0 | -2.086174 | -2.863205 | -1.566758 |
| 20 | 6 | 0 | -1.964188 | -2.456898 | 0.540644  |
| 21 | 1 | 0 | -1.788262 | -3.527493 | 0.717532  |
| 22 | 6 | 0 | -3.419984 | -2.145380 | 0.903012  |
| 23 | 1 | 0 | -3.631287 | -1.101972 | 0.635318  |
| 24 | 6 | 0 | -4.444918 | -3.045127 | 0.215005  |
| 25 | 1 | 0 | -4.225767 | -4.085502 | 0.473737  |
| 26 | 6 | 0 | -5.852717 | -2.703068 | 0.675252  |
| 27 | 1 | 0 | -6.550376 | -3.432439 | 0.249222  |
| 28 | 1 | 0 | -5.900655 | -2.725296 | 1.766624  |
| 29 | 8 | 0 | -1.160666 | -1.728877 | 1.468283  |
| 30 | 1 | 0 | -0.554828 | -1.148671 | 0.978409  |
| 31 | 8 | 0 | -3.583471 | -2.347426 | 2.295128  |
| 32 | 1 | 0 | -2.814892 | -1.943000 | 2.712524  |
| 33 | 8 | 0 | -4.369211 | -2.937221 | -1.193613 |
| 34 | 1 | 0 | -4.735669 | -2.071745 | -1.413165 |
| 35 | 8 | 0 | -6.113880 | -1.401197 | 0.162367  |
| 36 | 1 | 0 | -6.995035 | -1.130708 | 0.423837  |
| 37 | 6 | 0 | 1.502721  | -0.195043 | -1.176607 |
| 38 | 1 | 0 | 1.664476  | -0.327035 | -2.261488 |
| 39 | 1 | 0 | 1.525946  | 0.879732  | -0.970045 |
| 40 | 6 | 0 | 2.619353  | -0.881029 | -0.400038 |
| 41 | 1 | 0 | 2.383444  | -0.833784 | 0.668523  |
| 42 | 1 | 0 | 2.664733  | -1.941549 | -0.670629 |
| 43 | 7 | 0 | -1.766699 | 5.249680  | 0.658014  |
| 44 | 8 | 0 | -1.477286 | 6.193268  | -0.043601 |
| 45 | 8 | 0 | -2.214181 | 5.327441  | 1.779964  |
| 46 | 6 | 0 | 3.979459  | -0.238778 | -0.662828 |
| 47 | 1 | 0 | 3.945569  | 0.816518  | -0.367464 |
| 48 | 1 | 0 | 4.190575  | -0.253204 | -1.738905 |
| 49 | 6 | 0 | 5.115632  | -0.934370 | 0.083238  |
| 50 | 1 | 0 | 5.160803  | -1.986274 | -0.223499 |
| 51 | 1 | 0 | 4.895185  | -0.935328 | 1.157290  |
| 52 | 6 | 0 | 6.474754  | -0.280069 | -0.152535 |
| 53 | 1 | 0 | 6.429706  | 0.770779  | 0.157993  |
| 54 | 1 | 0 | 6.694132  | -0.275014 | -1.227096 |
| 55 | 6 | 0 | 7.611081  | -0.977173 | 0.591510  |
| 56 | 1 | 0 | 7.389199  | -0.987169 | 1.665589  |
| 57 | 1 | 0 | 7.660417  | -2.027180 | 0.278030  |
| 58 | 6 | 0 | 8.970807  | -0.319685 | 0.365277  |
| 59 | 1 | 0 | 9.190750  | -0.308413 | -0.707688 |
| 60 | 1 | 0 | 8.920197  | 0.727900  | 0.681165  |
| 61 | 6 | 0 | 10.095978 | -1.029459 | 1.114147  |
| 62 | 1 | 0 | 10.179842 | -2.070836 | 0.792673  |
| 63 | 1 | 0 | 11.060215 | -0.547232 | 0.943348  |
| 64 | 1 | 0 | 9.906745  | -1.028993 | 2.190672  |

### Structure 34b (M06-2X, Benzene)

Energy (Hartrees): = - 1456.4905281  
 No imaginary frequencies

Standard orientation:

| Center<br>Number | Atomic<br>Number | Atomic<br>Type | Coordinates (Angstroms) |           |           |
|------------------|------------------|----------------|-------------------------|-----------|-----------|
|                  |                  |                | X                       | Y         | Z         |
| 1                | 6                | 0              | -1.149375               | 1.383955  | -0.941199 |
| 2                | 6                | 0              | -1.653542               | 1.535195  | 0.351544  |
| 3                | 6                | 0              | -1.839827               | 2.800326  | 0.884055  |
| 4                | 6                | 0              | -1.511089               | 3.900553  | 0.102471  |
| 5                | 6                | 0              | -1.012129               | 3.782157  | -1.183623 |
| 6                | 6                | 0              | -0.835903               | 2.505296  | -1.702656 |
| 7                | 1                | 0              | -1.903147               | 0.656508  | 0.935045  |
| 8                | 1                | 0              | -2.232864               | 2.944899  | 1.880938  |
| 9                | 1                | 0              | -0.775171               | 4.668311  | -1.755903 |
| 10               | 1                | 0              | -0.453076               | 2.383572  | -2.709913 |
| 11               | 6                | 0              | -0.926255               | -0.000498 | -1.498625 |
| 12               | 1                | 0              | -0.731373               | 0.065814  | -2.584522 |
| 13               | 7                | 0              | 0.171174                | -0.700058 | -0.827902 |
| 14               | 8                | 0              | -2.053026               | -0.816692 | -1.270048 |
| 15               | 6                | 0              | -1.618043               | -2.146148 | -0.934002 |
| 16               | 6                | 0              | -0.106497               | -2.099445 | -1.163389 |
| 17               | 1                | 0              | 0.438503                | -2.779300 | -0.507393 |
| 18               | 1                | 0              | 0.145819                | -2.320883 | -2.211672 |
| 19               | 1                | 0              | -2.124650               | -2.850651 | -1.589525 |
| 20               | 6                | 0              | -1.975136               | -2.456754 | 0.519091  |

|    |   |   |           |           |           |
|----|---|---|-----------|-----------|-----------|
| 21 | 1 | 0 | -1.810598 | -3.530577 | 0.685591  |
| 22 | 6 | 0 | -3.421419 | -2.126231 | 0.905659  |
| 23 | 1 | 0 | -3.626081 | -1.082815 | 0.633678  |
| 24 | 6 | 0 | -4.469407 | -3.021778 | 0.247080  |
| 25 | 1 | 0 | -4.253105 | -4.062939 | 0.505510  |
| 26 | 6 | 0 | -5.866506 | -2.670065 | 0.730479  |
| 27 | 1 | 0 | -6.575571 | -3.394366 | 0.314646  |
| 28 | 1 | 0 | -5.905306 | -2.697476 | 1.822402  |
| 29 | 8 | 0 | -1.145309 | -1.745087 | 1.438113  |
| 30 | 1 | 0 | -0.548753 | -1.163191 | 0.936089  |
| 31 | 8 | 0 | -3.558976 | -2.310723 | 2.304836  |
| 32 | 1 | 0 | -2.775363 | -1.909797 | 2.697899  |
| 33 | 8 | 0 | -4.422767 | -2.920676 | -1.164955 |
| 34 | 1 | 0 | -4.786612 | -2.052116 | -1.377752 |
| 35 | 8 | 0 | -6.131784 | -1.363856 | 0.229254  |
| 36 | 1 | 0 | -7.043352 | -1.136199 | 0.424511  |
| 37 | 6 | 0 | 1.494962  | -0.217255 | -1.207688 |
| 38 | 1 | 0 | 1.653145  | -0.347039 | -2.292515 |
| 39 | 1 | 0 | 1.527956  | 0.856261  | -0.996429 |
| 40 | 6 | 0 | 2.607347  | -0.913931 | -0.433753 |
| 41 | 1 | 0 | 2.367370  | -0.878041 | 0.634588  |
| 42 | 1 | 0 | 2.654862  | -1.971103 | -0.716826 |
| 43 | 7 | 0 | -1.708449 | 5.252834  | 0.661564  |
| 44 | 8 | 0 | -1.416788 | 6.198997  | -0.037720 |
| 45 | 8 | 0 | -2.149655 | 5.337937  | 1.786796  |
| 46 | 6 | 0 | 3.967901  | -0.265821 | -0.681116 |
| 47 | 1 | 0 | 3.928345  | 0.786088  | -0.374287 |
| 48 | 1 | 0 | 4.186008  | -0.268944 | -1.755949 |
| 49 | 6 | 0 | 5.101090  | -0.965558 | 0.065990  |
| 50 | 1 | 0 | 5.153398  | -2.013608 | -0.252857 |
| 51 | 1 | 0 | 4.871503  | -0.978980 | 1.138185  |
| 52 | 6 | 0 | 6.459705  | -0.302675 | -0.149756 |
| 53 | 1 | 0 | 6.405646  | 0.745243  | 0.169511  |
| 54 | 1 | 0 | 6.690607  | -0.288281 | -1.221951 |
| 55 | 6 | 0 | 7.591761  | -0.999886 | 0.601236  |
| 56 | 1 | 0 | 7.358054  | -1.018445 | 1.672836  |
| 57 | 1 | 0 | 7.649859  | -2.047209 | 0.279985  |
| 58 | 6 | 0 | 8.951351  | -0.334869 | 0.396217  |
| 59 | 1 | 0 | 9.186785  | -0.317971 | -0.673667 |
| 60 | 1 | 0 | 8.892656  | 0.710859  | 0.717656  |
| 61 | 6 | 0 | 10.069774 | -1.042085 | 1.155981  |
| 62 | 1 | 0 | 10.165762 | -2.081961 | 0.831357  |
| 63 | 1 | 0 | 11.034318 | -0.553627 | 0.999915  |
| 64 | 1 | 0 | 9.869212  | -1.047556 | 2.230988  |

### Structure 34b (M06-2X, DMSO)

Energy (Hartrees): = - 1456.4913047  
 No imaginary frequencies

Standard orientation:

| Center<br>Number | Atomic<br>Number | Atomic<br>Type | Coordinates (Angstroms) |           |           |
|------------------|------------------|----------------|-------------------------|-----------|-----------|
|                  |                  |                | X                       | Y         | Z         |
| 1                | 6                | 0              | -1.173408               | 1.375158  | -0.936915 |
| 2                | 6                | 0              | -1.730647               | 1.503281  | 0.337082  |
| 3                | 6                | 0              | -1.976802               | 2.758481  | 0.868821  |
| 4                | 6                | 0              | -1.655802               | 3.872543  | 0.102959  |
| 5                | 6                | 0              | -1.100420               | 3.777745  | -1.162683 |
| 6                | 6                | 0              | -0.863153               | 2.510166  | -1.680405 |
| 7                | 1                | 0              | -1.974646               | 0.616523  | 0.910784  |
| 8                | 1                | 0              | -2.409949               | 2.879651  | 1.852340  |
| 9                | 1                | 0              | -0.864737               | 4.670319  | -1.725919 |
| 10               | 1                | 0              | -0.434979               | 2.404519  | -2.671157 |
| 11               | 6                | 0              | -0.896399               | 0.001594  | -1.497620 |
| 12               | 1                | 0              | -0.681341               | 0.078727  | -2.576785 |
| 13               | 7                | 0              | 0.205639                | -0.670470 | -0.806366 |
| 14               | 8                | 0              | -2.008860               | -0.847695 | -1.294442 |
| 15               | 6                | 0              | -1.540852               | -2.163164 | -0.942486 |
| 16               | 6                | 0              | -0.031125               | -2.076040 | -1.157686 |
| 17               | 1                | 0              | 0.526561                | -2.748555 | -0.505316 |
| 18               | 1                | 0              | 0.234911                | -2.276041 | -2.205708 |
| 19               | 1                | 0              | -2.017172               | -2.887424 | -1.598507 |
| 20               | 6                | 0              | -1.902621               | -2.477453 | 0.509049  |
| 21               | 1                | 0              | -1.721343               | -3.548037 | 0.674855  |
| 22               | 6                | 0              | -3.356571               | -2.167969 | 0.885373  |
| 23               | 1                | 0              | -3.580174               | -1.134144 | 0.593089  |
| 24               | 6                | 0              | -4.385976               | -3.095812 | 0.242673  |
| 25               | 1                | 0              | -4.145661               | -4.128788 | 0.511459  |
| 26               | 6                | 0              | -5.790734               | -2.771604 | 0.720839  |
| 27               | 1                | 0              | -6.484707               | -3.506329 | 0.299614  |
| 28               | 1                | 0              | -5.838556               | -2.808689 | 1.812117  |
| 29               | 8                | 0              | -1.087457               | -1.751078 | 1.432464  |
| 30               | 1                | 0              | -0.509489               | -1.151398 | 0.925824  |
| 31               | 8                | 0              | -3.493715               | -2.319929 | 2.290890  |

|    |   |   |           |           |           |
|----|---|---|-----------|-----------|-----------|
| 32 | 1 | 0 | -2.710725 | -1.900528 | 2.667086  |
| 33 | 8 | 0 | -4.343202 | -3.010229 | -1.172645 |
| 34 | 1 | 0 | -4.713212 | -2.145516 | -1.391285 |
| 35 | 8 | 0 | -6.084076 | -1.465820 | 0.230346  |
| 36 | 1 | 0 | -7.022717 | -1.299059 | 0.354629  |
| 37 | 6 | 0 | 1.523104  | -0.158307 | -1.178947 |
| 38 | 1 | 0 | 1.683825  | -0.281575 | -2.262756 |
| 39 | 1 | 0 | 1.537074  | 0.914689  | -0.962479 |
| 40 | 6 | 0 | 2.641849  | -0.842913 | -0.404947 |
| 41 | 1 | 0 | 2.403568  | -0.810741 | 0.664362  |
| 42 | 1 | 0 | 2.699234  | -1.898732 | -0.690622 |
| 43 | 7 | 0 | -1.918717 | 5.211540  | 0.659137  |
| 44 | 8 | 0 | -1.682071 | 6.173654  | -0.041508 |
| 45 | 8 | 0 | -2.358522 | 5.281290  | 1.787992  |
| 46 | 6 | 0 | 3.995055  | -0.180705 | -0.652649 |
| 47 | 1 | 0 | 3.950411  | 0.865984  | -0.328857 |
| 48 | 1 | 0 | 4.203756  | -0.167992 | -1.729225 |
| 49 | 6 | 0 | 5.137253  | -0.886296 | 0.074279  |
| 50 | 1 | 0 | 5.200107  | -1.924429 | -0.273968 |
| 51 | 1 | 0 | 4.910213  | -0.929461 | 1.146560  |
| 52 | 6 | 0 | 6.488168  | -0.203494 | -0.125728 |
| 53 | 1 | 0 | 6.427705  | 0.830058  | 0.236676  |
| 54 | 1 | 0 | 6.710022  | -0.146058 | -1.198536 |
| 55 | 6 | 0 | 7.631402  | -0.921179 | 0.587524  |
| 56 | 1 | 0 | 7.403581  | -0.990704 | 1.658550  |
| 57 | 1 | 0 | 7.700075  | -1.951289 | 0.216373  |
| 58 | 6 | 0 | 8.982145  | -0.232052 | 0.407233  |
| 59 | 1 | 0 | 9.209525  | -0.160256 | -0.662256 |
| 60 | 1 | 0 | 8.914282  | 0.795321  | 0.781989  |
| 61 | 6 | 0 | 10.112703 | -0.964953 | 1.123289  |
| 62 | 1 | 0 | 10.211843 | -1.988108 | 0.749262  |
| 63 | 1 | 0 | 11.072708 | -0.462907 | 0.980352  |
| 64 | 1 | 0 | 9.921779  | -1.020233 | 2.198941  |

### Structure 34c (M06-2X, Gas Phase)

Energy (Hartrees): = - 1456.4582016  
No imaginary frequencies

Standard orientation:

| Center<br>Number | Atomic<br>Number | Atomic<br>Type | Coordinates (Angstroms) |           |           |
|------------------|------------------|----------------|-------------------------|-----------|-----------|
|                  |                  |                | X                       | Y         | Z         |
| 1                | 6                | 0              | -2.143463               | -2.155090 | -0.123741 |
| 2                | 6                | 0              | -0.810293               | -2.045006 | 0.607442  |
| 3                | 6                | 0              | -3.046412               | -1.030889 | 0.386062  |
| 4                | 1                | 0              | -0.131566               | -2.806786 | 0.223777  |
| 5                | 1                | 0              | -0.950775               | -2.215223 | 1.689390  |
| 6                | 1                | 0              | -2.615875               | -3.117784 | 0.063228  |
| 7                | 1                | 0              | -3.217700               | -1.143204 | 1.467944  |
| 8                | 8                | 0              | -2.368116               | 0.209475  | 0.157356  |
| 9                | 7                | 0              | -0.225484               | -0.723007 | 0.355813  |
| 10               | 6                | 0              | -4.388810               | -0.895665 | -0.331560 |
| 11               | 1                | 0              | -4.213733               | -1.043646 | -1.404801 |
| 12               | 6                | 0              | -5.411738               | -1.906545 | 0.161745  |
| 13               | 1                | 0              | -5.594251               | -1.717730 | 1.229707  |
| 14               | 6                | 0              | -6.729257               | -1.755808 | -0.576881 |
| 15               | 1                | 0              | -6.543895               | -1.858507 | -1.653403 |
| 16               | 1                | 0              | -7.165323               | -0.775960 | -0.368894 |
| 17               | 8                | 0              | -4.956937               | 0.373657  | -0.073438 |
| 18               | 1                | 0              | -4.241320               | 1.013933  | -0.142021 |
| 19               | 8                | 0              | -4.903618               | -3.210232 | -0.032892 |
| 20               | 1                | 0              | -5.661975               | -3.799497 | 0.050243  |
| 21               | 8                | 0              | -7.549795               | -2.817549 | -0.101131 |
| 22               | 1                | 0              | -8.344008               | -2.863201 | -0.635809 |
| 23               | 8                | 0              | -1.938136               | -2.046947 | -1.515681 |
| 24               | 1                | 0              | -1.356035               | -1.287357 | -1.633729 |
| 25               | 6                | 0              | 1.118543                | -0.621910 | 0.933513  |
| 26               | 1                | 0              | 1.140570                | -1.070751 | 1.941666  |
| 27               | 1                | 0              | 1.371225                | 0.434013  | 1.053516  |
| 28               | 6                | 0              | -0.612396               | 1.700973  | 0.524575  |
| 29               | 6                | 0              | -0.292647               | 2.022301  | -0.795138 |
| 30               | 6                | 0              | -0.481028               | 2.657457  | 1.525393  |
| 31               | 6                | 0              | 0.162311                | 3.290638  | -1.115953 |
| 32               | 1                | 0              | -0.402380               | 1.266031  | -1.562345 |
| 33               | 6                | 0              | -0.022486               | 3.934356  | 1.222896  |
| 34               | 1                | 0              | -0.735399               | 2.406002  | 2.548887  |
| 35               | 6                | 0              | 0.289955                | 4.221908  | -0.094244 |
| 36               | 1                | 0              | 0.417560                | 3.571358  | -2.128464 |
| 37               | 1                | 0              | 0.095507                | 4.698094  | 1.979099  |
| 38               | 6                | 0              | -1.133782               | 0.316307  | 0.831650  |
| 39               | 1                | 0              | -1.314250               | 0.212947  | 1.920903  |
| 40               | 6                | 0              | 2.182434                | -1.264068 | 0.049939  |
| 41               | 1                | 0              | 1.937968                | -2.312182 | -0.148364 |

|    |   |   |           |           |           |
|----|---|---|-----------|-----------|-----------|
| 42 | 1 | 0 | 2.179136  | -0.751294 | -0.917445 |
| 43 | 7 | 0 | 0.781338  | 5.576905  | -0.426351 |
| 44 | 8 | 0 | 1.022986  | 5.812234  | -1.588853 |
| 45 | 8 | 0 | 0.911053  | 6.362137  | 0.485882  |
| 46 | 6 | 0 | 3.569409  | -1.182572 | 0.683200  |
| 47 | 1 | 0 | 3.804349  | -0.136321 | 0.914153  |
| 48 | 1 | 0 | 3.564728  | -1.716734 | 1.640984  |
| 49 | 6 | 0 | 4.667544  | -1.757436 | -0.208152 |
| 50 | 1 | 0 | 4.682439  | -1.213353 | -1.159924 |
| 51 | 1 | 0 | 4.429779  | -2.799894 | -0.451971 |
| 52 | 6 | 0 | 6.051079  | -1.691150 | 0.433882  |
| 53 | 1 | 0 | 6.282559  | -0.649721 | 0.688643  |
| 54 | 1 | 0 | 6.037981  | -2.244564 | 1.380678  |
| 55 | 6 | 0 | 7.155856  | -2.247916 | -0.460453 |
| 56 | 1 | 0 | 7.171693  | -1.692548 | -1.406114 |
| 57 | 1 | 0 | 6.925004  | -3.288783 | -0.718601 |
| 58 | 6 | 0 | 8.538956  | -2.183668 | 0.183607  |
| 59 | 1 | 0 | 8.766562  | -1.143808 | 0.442249  |
| 60 | 1 | 0 | 8.522349  | -2.740062 | 1.126960  |
| 61 | 6 | 0 | 9.634481  | -2.739812 | -0.722503 |
| 62 | 1 | 0 | 9.682349  | -2.181813 | -1.661194 |
| 63 | 1 | 0 | 10.616034 | -2.682482 | -0.248274 |
| 64 | 1 | 0 | 9.440686  | -3.787107 | -0.968521 |

### Structure 34c (M06-2X, Benzene)

Energy (Hartrees): = - 1456.4878174  
 No imaginary frequencies

Standard orientation:

| Center<br>Number | Atomic<br>Number | Atomic<br>Type | Coordinates (Angstroms) |           |           |
|------------------|------------------|----------------|-------------------------|-----------|-----------|
|                  |                  |                | X                       | Y         | Z         |
| 1                | 6                | 0              | 2.172146                | -2.151758 | 0.078671  |
| 2                | 6                | 0              | 0.848487                | -2.051782 | -0.670543 |
| 3                | 6                | 0              | 3.067907                | -1.010124 | -0.405196 |
| 4                | 1                | 0              | 0.175361                | -2.829845 | -0.309750 |
| 5                | 1                | 0              | 1.008162                | -2.202902 | -1.751923 |
| 6                | 1                | 0              | 2.658289                | -3.106753 | -0.111545 |
| 7                | 1                | 0              | 3.257950                | -1.111529 | -1.484660 |
| 8                | 8                | 0              | 2.368350                | 0.218229  | -0.174804 |
| 9                | 7                | 0              | 0.242066                | -0.742513 | -0.404611 |
| 10               | 6                | 0              | 4.395123                | -0.857783 | 0.339010  |
| 11               | 1                | 0              | 4.202486                | -1.013920 | 1.407880  |
| 12               | 6                | 0              | 5.451521                | -1.842960 | -0.136900 |
| 13               | 1                | 0              | 5.663612                | -1.634937 | -1.195690 |
| 14               | 6                | 0              | 6.740979                | -1.682929 | 0.647154  |
| 15               | 1                | 0              | 6.525613                | -1.811143 | 1.715210  |
| 16               | 1                | 0              | 7.168173                | -0.691707 | 0.476187  |
| 17               | 8                | 0              | 4.941608                | 0.427295  | 0.103284  |
| 18               | 1                | 0              | 4.207698                | 1.048591  | 0.159471  |
| 19               | 8                | 0              | 4.962149                | -3.160335 | 0.021160  |
| 20               | 1                | 0              | 5.736255                | -3.732335 | -0.040877 |
| 21               | 8                | 0              | 7.602614                | -2.715981 | 0.178783  |
| 22               | 1                | 0              | 8.362694                | -2.771583 | 0.762488  |
| 23               | 8                | 0              | 1.942674                | -2.059961 | 1.470301  |
| 24               | 1                | 0              | 1.340431                | -1.314065 | 1.581437  |
| 25               | 6                | 0              | -1.103967               | -0.656251 | -0.983189 |
| 26               | 1                | 0              | -1.121720               | -1.111821 | -1.987530 |
| 27               | 1                | 0              | -1.366522               | 0.396382  | -1.109330 |
| 28               | 6                | 0              | 0.595168                | 1.689914  | -0.541703 |
| 29               | 6                | 0              | 0.285110                | 2.000332  | 0.783323  |
| 30               | 6                | 0              | 0.430515                | 2.646036  | -1.538645 |
| 31               | 6                | 0              | -0.188401               | 3.259170  | 1.114387  |
| 32               | 1                | 0              | 0.415690                | 1.246540  | 1.550076  |
| 33               | 6                | 0              | -0.048151               | 3.912676  | -1.226073 |
| 34               | 1                | 0              | 0.674397                | 2.403801  | -2.566867 |
| 35               | 6                | 0              | -0.346278               | 4.191368  | 0.097055  |
| 36               | 1                | 0              | -0.433907               | 3.526003  | 2.133174  |
| 37               | 1                | 0              | -0.189035               | 4.671796  | -1.983158 |
| 38               | 6                | 0              | 1.137972                | 0.315837  | -0.862002 |
| 39               | 1                | 0              | 1.330963                | 0.228617  | -1.949049 |
| 40               | 6                | 0              | -2.159661               | -1.302239 | -0.092092 |
| 41               | 1                | 0              | -1.911664               | -2.350788 | 0.100673  |
| 42               | 1                | 0              | -2.148285               | -0.790846 | 0.876359  |
| 43               | 7                | 0              | -0.854730               | 5.534471  | 0.439430  |
| 44               | 8                | 0              | -1.050189               | 5.780201  | 1.609775  |
| 45               | 8                | 0              | -1.047932               | 6.311418  | -0.470295 |
| 46               | 6                | 0              | -3.553532               | -1.219190 | -0.710625 |
| 47               | 1                | 0              | -3.788257               | -0.172255 | -0.938913 |
| 48               | 1                | 0              | -3.560663               | -1.754664 | -1.667713 |
| 49               | 6                | 0              | -4.643048               | -1.790295 | 0.194284  |
| 50               | 1                | 0              | -4.640333               | -1.248657 | 1.147734  |
| 51               | 1                | 0              | -4.408800               | -2.835318 | 0.430875  |
| 52               | 6                | 0              | -6.036358               | -1.711930 | -0.426131 |



|    |   |   |            |           |           |
|----|---|---|------------|-----------|-----------|
| 53 | 1 | 0 | -6.263178  | -0.667753 | -0.674218 |
| 54 | 1 | 0 | -6.042547  | -2.263627 | -1.374101 |
| 55 | 6 | 0 | -7.131707  | -2.261416 | 0.484857  |
| 56 | 1 | 0 | -7.124637  | -1.710157 | 1.433156  |
| 57 | 1 | 0 | -6.907654  | -3.306176 | 0.733560  |
| 58 | 6 | 0 | -8.526618  | -2.179440 | -0.132049 |
| 59 | 1 | 0 | -8.748752  | -1.136185 | -0.382610 |
| 60 | 1 | 0 | -8.536464  | -2.734097 | -1.076720 |
| 61 | 6 | 0 | -9.610157  | -2.725323 | 0.793262  |
| 62 | 1 | 0 | -9.637322  | -2.168587 | 1.734218  |
| 63 | 1 | 0 | -10.600477 | -2.656295 | 0.337437  |
| 64 | 1 | 0 | -9.425397  | -3.775904 | 1.034208  |

### Structure 34c (M06-2X, DMSO)

Energy (Hartrees): = - 1456.4893731  
 No imaginary frequencies

Standard orientation:

| Center<br>Number | Atomic<br>Number | Atomic<br>Type | Coordinates (Angstroms) |           |           |
|------------------|------------------|----------------|-------------------------|-----------|-----------|
|                  |                  |                | X                       | Y         | Z         |
| 1                | 6                | 0              | 2.167122                | -2.140158 | 0.102418  |
| 2                | 6                | 0              | 0.837772                | -2.048655 | -0.635861 |
| 3                | 6                | 0              | 3.059427                | -1.014802 | -0.417280 |
| 4                | 1                | 0              | 0.163407                | -2.820018 | -0.262578 |
| 5                | 1                | 0              | 0.992559                | -2.211191 | -1.715093 |
| 6                | 1                | 0              | 2.642969                | -3.102837 | -0.074975 |
| 7                | 1                | 0              | 3.221264                | -1.137941 | -1.498272 |
| 8                | 8                | 0              | 2.373244                | 0.222451  | -0.189976 |
| 9                | 7                | 0              | 0.236595                | -0.733627 | -0.381550 |
| 10               | 6                | 0              | 4.406911                | -0.850815 | 0.281590  |
| 11               | 1                | 0              | 4.244427                | -0.913490 | 1.365057  |
| 12               | 6                | 0              | 5.423735                | -1.905032 | -0.128709 |
| 13               | 1                | 0              | 5.538039                | -1.878592 | -1.222296 |
| 14               | 6                | 0              | 6.778019                | -1.633688 | 0.503931  |
| 15               | 1                | 0              | 6.656567                | -1.557209 | 1.591289  |
| 16               | 1                | 0              | 7.199771                | -0.702677 | 0.118999  |
| 17               | 8                | 0              | 4.974361                | 0.400775  | -0.072572 |
| 18               | 1                | 0              | 4.248036                | 1.034493  | -0.060272 |
| 19               | 8                | 0              | 4.960232                | -3.177190 | 0.287586  |
| 20               | 1                | 0              | 5.738633                | -3.747827 | 0.268229  |
| 21               | 8                | 0              | 7.592211                | -2.753306 | 0.164647  |
| 22               | 1                | 0              | 8.376452                | -2.738278 | 0.721280  |
| 23               | 8                | 0              | 1.955274                | -2.017269 | 1.497956  |
| 24               | 1                | 0              | 1.367545                | -1.256948 | 1.597291  |
| 25               | 6                | 0              | -1.106344               | -0.652233 | -0.972292 |
| 26               | 1                | 0              | -1.115142               | -1.124608 | -1.967927 |
| 27               | 1                | 0              | -1.365188               | 0.398747  | -1.119235 |
| 28               | 6                | 0              | 0.593929                | 1.692315  | -0.535082 |
| 29               | 6                | 0              | 0.295421                | 2.000649  | 0.793654  |
| 30               | 6                | 0              | 0.420441                | 2.648376  | -1.530899 |
| 31               | 6                | 0              | -0.177006               | 3.258566  | 1.130286  |
| 32               | 1                | 0              | 0.431616                | 1.248655  | 1.561899  |
| 33               | 6                | 0              | -0.056808               | 3.914241  | -1.212909 |
| 34               | 1                | 0              | 0.653256                | 2.404701  | -2.561351 |
| 35               | 6                | 0              | -0.344768               | 4.190924  | 0.113793  |
| 36               | 1                | 0              | -0.414293               | 3.517368  | 2.153302  |
| 37               | 1                | 0              | -0.202822               | 4.669225  | -1.973334 |
| 38               | 6                | 0              | 1.130483                | 0.317644  | -0.862400 |
| 39               | 1                | 0              | 1.304894                | 0.223829  | -1.949832 |
| 40               | 6                | 0              | -2.169442               | -1.282294 | -0.079504 |
| 41               | 1                | 0              | -1.921764               | -2.327511 | 0.132501  |
| 42               | 1                | 0              | -2.172329               | -0.752243 | 0.879538  |
| 43               | 7                | 0              | -0.853543               | 5.529384  | 0.460810  |
| 44               | 8                | 0              | -1.047389               | 5.776469  | 1.632987  |
| 45               | 8                | 0              | -1.053339               | 6.313204  | -0.443745 |
| 46               | 6                | 0              | -3.556463               | -1.212340 | -0.713608 |
| 47               | 1                | 0              | -3.792791               | -0.168499 | -0.954471 |
| 48               | 1                | 0              | -3.549495               | -1.758980 | -1.664314 |
| 49               | 6                | 0              | -4.650765               | -1.780327 | 0.186982  |
| 50               | 1                | 0              | -4.656195               | -1.232090 | 1.136959  |
| 51               | 1                | 0              | -4.415350               | -2.823842 | 0.429945  |
| 52               | 6                | 0              | -6.040220               | -1.709692 | -0.442031 |
| 53               | 1                | 0              | -6.271107               | -0.666540 | -0.691377 |
| 54               | 1                | 0              | -6.037763               | -2.263734 | -1.388798 |
| 55               | 6                | 0              | -7.136322               | -2.264619 | 0.464363  |
| 56               | 1                | 0              | -7.135398               | -1.712824 | 1.412644  |
| 57               | 1                | 0              | -6.908598               | -3.309032 | 0.711944  |
| 58               | 6                | 0              | -8.529475               | -2.188690 | -0.156335 |
| 59               | 1                | 0              | -8.756911               | -1.145561 | -0.403262 |
| 60               | 1                | 0              | -8.533756               | -2.741757 | -1.102184 |
| 61               | 6                | 0              | -9.610409               | -2.744332 | 0.766072  |
| 62               | 1                | 0              | -9.639173               | -2.191306 | 1.709515  |
| 63               | 1                | 0              | -10.601634              | -2.677682 | 0.310988  |

64 1 0 -9.419281 -3.795385 1.001222

### Structure 34d (M06-2X, Gas Phase)

Energy (Hartrees): = - 1456.460099  
No imaginary frequencies

Standard orientation:

| Center<br>Number | Atomic<br>Number | Atomic<br>Type | Coordinates (Angstroms) |           |           |
|------------------|------------------|----------------|-------------------------|-----------|-----------|
|                  |                  |                | X                       | Y         | Z         |
| 1                | 6                | 0              | 1.432111                | -1.942932 | -1.271247 |
| 2                | 6                | 0              | 0.515092                | -0.858944 | -1.847810 |
| 3                | 6                | 0              | 2.134535                | -1.342524 | -0.054081 |
| 4                | 1                | 0              | -0.053667               | -1.257843 | -2.688202 |
| 5                | 1                | 0              | 1.129189                | -0.030070 | -2.219696 |
| 6                | 1                | 0              | 2.172853                | -2.256931 | -2.005339 |
| 7                | 1                | 0              | 2.712649                | -0.462387 | -0.364559 |
| 8                | 8                | 0              | 1.112450                | -0.939633 | 0.874219  |
| 9                | 7                | 0              | -0.425089               | -0.331100 | -0.854186 |
| 10               | 6                | 0              | 3.050618                | -2.280737 | 0.733284  |
| 11               | 1                | 0              | 2.576613                | -3.268936 | 0.798235  |
| 12               | 6                | 0              | 4.417022                | -2.428542 | 0.083767  |
| 13               | 1                | 0              | 4.892712                | -1.437413 | 0.047968  |
| 14               | 6                | 0              | 5.312027                | -3.354397 | 0.888041  |
| 15               | 1                | 0              | 4.807266                | -4.321721 | 1.004723  |
| 16               | 1                | 0              | 5.510658                | -2.920973 | 1.871193  |
| 17               | 8                | 0              | 3.292462                | -1.745774 | 2.022747  |
| 18               | 1                | 0              | 2.434757                | -1.480740 | 2.370827  |
| 19               | 8                | 0              | 4.242981                | -2.943890 | -1.219017 |
| 20               | 1                | 0              | 5.114095                | -3.248380 | -1.497918 |
| 21               | 8                | 0              | 6.498277                | -3.492316 | 0.114994  |
| 22               | 1                | 0              | 7.048155                | -4.174246 | 0.503871  |
| 23               | 8                | 0              | 0.692870                | -3.095115 | -0.906990 |
| 24               | 1                | 0              | 0.243102                | -2.890715 | -0.080556 |
| 25               | 6                | 0              | -1.634972               | -1.125184 | -0.608835 |
| 26               | 1                | 0              | -1.536469               | -1.741173 | 0.299291  |
| 27               | 1                | 0              | -1.768011               | -1.824195 | -1.437160 |
| 28               | 6                | 0              | 0.978412                | 1.403056  | 0.201704  |
| 29               | 6                | 0              | 0.468975                | 2.375363  | -0.657799 |
| 30               | 6                | 0              | 2.099089                | 1.688253  | 0.983970  |
| 31               | 6                | 0              | 1.066144                | 3.625544  | -0.740626 |
| 32               | 1                | 0              | -0.397655               | 2.134483  | -1.261385 |
| 33               | 6                | 0              | 2.708713                | 2.932239  | 0.910133  |
| 34               | 1                | 0              | 2.507963                | 0.924053  | 1.634992  |
| 35               | 6                | 0              | 2.175813                | 3.878933  | 0.048938  |
| 36               | 1                | 0              | 0.691878                | 4.396775  | -1.399471 |
| 37               | 1                | 0              | 3.580593                | 3.178319  | 1.500461  |
| 38               | 6                | 0              | 0.245409                | 0.073602  | 0.351680  |
| 39               | 1                | 0              | -0.509768               | 0.203357  | 1.131798  |
| 40               | 6                | 0              | -2.863669               | -0.230806 | -0.483462 |
| 41               | 1                | 0              | -2.692537               | 0.520374  | 0.297776  |
| 42               | 1                | 0              | -2.982015               | 0.321217  | -1.421734 |
| 43               | 7                | 0              | 2.817721                | 5.207835  | -0.031014 |
| 44               | 8                | 0              | 2.342584                | 6.011610  | -0.802030 |
| 45               | 8                | 0              | 3.776782                | 5.408512  | 0.680420  |
| 46               | 6                | 0              | -4.134924               | -1.015273 | -0.170527 |
| 47               | 1                | 0              | -4.280510               | -1.791209 | -0.931868 |
| 48               | 1                | 0              | -4.016097               | -1.539874 | 0.785287  |
| 49               | 6                | 0              | -5.377940               | -0.130481 | -0.110251 |
| 50               | 1                | 0              | -5.499199               | 0.386530  | -1.069619 |
| 51               | 1                | 0              | -5.230988               | 0.651168  | 0.644742  |
| 52               | 6                | 0              | -6.653265               | -0.907126 | 0.208240  |
| 53               | 1                | 0              | -6.795212               | -1.694374 | -0.541946 |
| 54               | 1                | 0              | -6.536389               | -1.416875 | 1.172273  |
| 55               | 6                | 0              | -7.896555               | -0.022191 | 0.252302  |
| 56               | 1                | 0              | -8.015366               | 0.484934  | -0.713029 |
| 57               | 1                | 0              | -7.753805               | 0.768001  | 0.999453  |
| 58               | 6                | 0              | -9.174128               | -0.794399 | 0.574765  |
| 59               | 1                | 0              | -9.314304               | -1.584282 | -0.170984 |
| 60               | 1                | 0              | -9.055123               | -1.298140 | 1.540128  |
| 61               | 6                | 0              | -10.407668              | 0.104409  | 0.611520  |
| 62               | 1                | 0              | -10.561552              | 0.592313  | -0.354458 |
| 63               | 1                | 0              | -11.310670              | -0.460806 | 0.849516  |
| 64               | 1                | 0              | -10.293845              | 0.888295  | 1.364804  |

### Structure 34d (M06-2X, Benzene)

Energy (Hartrees): = - 1456.488815  
No imaginary frequencies

Standard orientation:

| Center | Atomic | Atomic | Coordinates (Angstroms) |  |  |
|--------|--------|--------|-------------------------|--|--|
|--------|--------|--------|-------------------------|--|--|

| Number | Number | Type | X         | Y         | Z         |
|--------|--------|------|-----------|-----------|-----------|
| 1      | 6      | 0    | -1.428190 | -1.947254 | 1.258750  |
| 2      | 6      | 0    | -0.498153 | -0.870343 | 1.826116  |
| 3      | 6      | 0    | -2.142581 | -1.341920 | 0.050918  |
| 4      | 1      | 0    | 0.079232  | -1.273069 | 2.658908  |
| 5      | 1      | 0    | -1.106592 | -0.042109 | 2.208296  |
| 6      | 1      | 0    | -2.160449 | -2.255734 | 2.003716  |
| 7      | 1      | 0    | -2.713546 | -0.460847 | 0.371677  |
| 8      | 8      | 0    | -1.130592 | -0.940586 | -0.888699 |
| 9      | 7      | 0    | 0.431371  | -0.344018 | 0.822208  |
| 10     | 6      | 0    | -3.073387 | -2.275041 | -0.727085 |
| 11     | 1      | 0    | -2.605430 | -3.264909 | -0.804616 |
| 12     | 6      | 0    | -4.431617 | -2.420026 | -0.058546 |
| 13     | 1      | 0    | -4.890664 | -1.423304 | 0.015880  |
| 14     | 6      | 0    | -5.358735 | -3.308754 | -0.867689 |
| 15     | 1      | 0    | -4.880161 | -4.284525 | -1.017888 |
| 16     | 1      | 0    | -5.569791 | -2.851513 | -1.837453 |
| 17     | 8      | 0    | -3.327839 | -1.734392 | -2.012947 |
| 18     | 1      | 0    | -2.473296 | -1.459567 | -2.363130 |
| 19     | 8      | 0    | -4.243010 | -2.975604 | 1.227477  |
| 20     | 1      | 0    | -5.115339 | -3.273955 | 1.510868  |
| 21     | 8      | 0    | -6.536845 | -3.439879 | -0.078844 |
| 22     | 1      | 0    | -7.089612 | -4.125661 | -0.460228 |
| 23     | 8      | 0    | -0.702577 | -3.107077 | 0.884602  |
| 24     | 1      | 0    | -0.247548 | -2.900031 | 0.060984  |
| 25     | 6      | 0    | 1.640329  | -1.138487 | 0.566612  |
| 26     | 1      | 0    | 1.538025  | -1.746606 | -0.345913 |
| 27     | 1      | 0    | 1.775334  | -1.841621 | 1.390917  |
| 28     | 6      | 0    | -0.972844 | 1.401226  | -0.217298 |
| 29     | 6      | 0    | -0.457772 | 2.367915  | 0.645658  |
| 30     | 6      | 0    | -2.095962 | 1.695691  | -0.993127 |
| 31     | 6      | 0    | -1.051052 | 3.618942  | 0.738253  |
| 32     | 1      | 0    | 0.410705  | 2.126097  | 1.246085  |
| 33     | 6      | 0    | -2.702865 | 2.940111  | -0.910240 |
| 34     | 1      | 0    | -2.510837 | 0.938599  | -1.648320 |
| 35     | 6      | 0    | -2.164757 | 3.880447  | -0.044043 |
| 36     | 1      | 0    | -0.666635 | 4.380573  | 1.402544  |
| 37     | 1      | 0    | -3.577104 | 3.184722  | -1.498128 |
| 38     | 6      | 0    | -0.249087 | 0.066656  | -0.375486 |
| 39     | 1      | 0    | 0.497507  | 0.192985  | -1.164071 |
| 40     | 6      | 0    | 2.870117  | -0.244871 | 0.445871  |
| 41     | 1      | 0    | 2.702534  | 0.503234  | -0.339014 |
| 42     | 1      | 0    | 2.983640  | 0.307943  | 1.384604  |
| 43     | 7      | 0    | -2.804057 | 5.206642  | 0.051433  |
| 44     | 8      | 0    | -2.326039 | 6.007689  | 0.825478  |
| 45     | 8      | 0    | -3.769734 | 5.418749  | -0.649661 |
| 46     | 6      | 0    | 4.144046  | -1.030109 | 0.144503  |
| 47     | 1      | 0    | 4.284183  | -1.801824 | 0.911205  |
| 48     | 1      | 0    | 4.032268  | -1.558606 | -0.809996 |
| 49     | 6      | 0    | 5.386433  | -0.143464 | 0.089983  |
| 50     | 1      | 0    | 5.495258  | 0.382080  | 1.046336  |
| 51     | 1      | 0    | 5.245980  | 0.630828  | -0.673905 |
| 52     | 6      | 0    | 6.668813  | -0.918082 | -0.206229 |
| 53     | 1      | 0    | 6.805635  | -1.696461 | 0.554215  |
| 54     | 1      | 0    | 6.565449  | -1.437918 | -1.166480 |
| 55     | 6      | 0    | 7.908299  | -0.026843 | -0.244562 |
| 56     | 1      | 0    | 8.010773  | 0.492232  | 0.716380  |
| 57     | 1      | 0    | 7.770867  | 0.753278  | -1.003331 |
| 58     | 6      | 0    | 9.196386  | -0.792822 | -0.539800 |
| 59     | 1      | 0    | 9.333180  | -1.572625 | 0.217384  |
| 60     | 1      | 0    | 9.097018  | -1.307870 | -1.501603 |
| 61     | 6      | 0    | 10.423455 | 0.113971  | -0.568482 |
| 62     | 1      | 0    | 10.561268 | 0.615694  | 0.393418  |
| 63     | 1      | 0    | 11.334510 | -0.448773 | -0.784333 |
| 64     | 1      | 0    | 10.320272 | 0.888022  | -1.334202 |

### Structure 34d (M06-2X, DMSO)

Energy (Hartrees): = - 1456.4893176  
 No imaginary frequencies

Standard orientation:

| Center Number | Atomic Number | Atomic Type | Coordinates (Angstroms) |           |           |
|---------------|---------------|-------------|-------------------------|-----------|-----------|
|               |               |             | X                       | Y         | Z         |
| 1             | 6             | 0           | -1.467524               | -1.935488 | 1.283759  |
| 2             | 6             | 0           | -0.533754               | -0.869192 | 1.862798  |
| 3             | 6             | 0           | -2.149802               | -1.329157 | 0.059012  |
| 4             | 1             | 0           | 0.023382                | -1.275885 | 2.707620  |
| 5             | 1             | 0           | -1.144120               | -0.035747 | 2.230639  |
| 6             | 1             | 0           | -2.218438               | -2.220271 | 2.019619  |
| 7             | 1             | 0           | -2.721551               | -0.444831 | 0.369367  |
| 8             | 8             | 0           | -1.117860               | -0.936870 | -0.861228 |
| 9             | 7             | 0           | 0.419180                | -0.352290 | 0.876302  |

|    |   |   |           |           |           |
|----|---|---|-----------|-----------|-----------|
| 10 | 6 | 0 | -3.071273 | -2.256520 | -0.736076 |
| 11 | 1 | 0 | -2.600880 | -3.243925 | -0.825518 |
| 12 | 6 | 0 | -4.435597 | -2.415876 | -0.082796 |
| 13 | 1 | 0 | -4.884473 | -1.418701 | 0.033648  |
| 14 | 6 | 0 | -5.364908 | -3.263029 | -0.932829 |
| 15 | 1 | 0 | -4.896318 | -4.237212 | -1.118008 |
| 16 | 1 | 0 | -5.566449 | -2.769576 | -1.886352 |
| 17 | 8 | 0 | -3.313315 | -1.700327 | -2.019531 |
| 18 | 1 | 0 | -2.456665 | -1.401168 | -2.346488 |
| 19 | 8 | 0 | -4.265732 | -3.030260 | 1.182084  |
| 20 | 1 | 0 | -5.143894 | -3.344037 | 1.431057  |
| 21 | 8 | 0 | -6.553730 | -3.413066 | -0.161361 |
| 22 | 1 | 0 | -7.082495 | -4.115550 | -0.550864 |
| 23 | 8 | 0 | -0.756757 | -3.115646 | 0.937727  |
| 24 | 1 | 0 | -0.266514 | -2.922546 | 0.129795  |
| 25 | 6 | 0 | 1.624127  | -1.159887 | 0.638253  |
| 26 | 1 | 0 | 1.519320  | -1.789960 | -0.258344 |
| 27 | 1 | 0 | 1.758723  | -1.836694 | 1.484622  |
| 28 | 6 | 0 | -0.948774 | 1.404855  | -0.189814 |
| 29 | 6 | 0 | -0.438900 | 2.369149  | 0.679577  |
| 30 | 6 | 0 | -2.053632 | 1.710954  | -0.987405 |
| 31 | 6 | 0 | -1.019326 | 3.626896  | 0.759458  |
| 32 | 1 | 0 | 0.416932  | 2.126176  | 1.297172  |
| 33 | 6 | 0 | -2.649449 | 2.961312  | -0.917709 |
| 34 | 1 | 0 | -2.463197 | 0.961597  | -1.654298 |
| 35 | 6 | 0 | -2.116616 | 3.898215  | -0.043598 |
| 36 | 1 | 0 | -0.632510 | 4.381342  | 1.430757  |
| 37 | 1 | 0 | -3.509347 | 3.208244  | -1.525644 |
| 38 | 6 | 0 | -0.235845 | 0.063271  | -0.334311 |
| 39 | 1 | 0 | 0.524263  | 0.184254  | -1.110129 |
| 40 | 6 | 0 | 2.854987  | -0.271902 | 0.492097  |
| 41 | 1 | 0 | 2.677345  | 0.469444  | -0.296731 |
| 42 | 1 | 0 | 2.988754  | 0.285765  | 1.425812  |
| 43 | 7 | 0 | -2.741191 | 5.228778  | 0.035493  |
| 44 | 8 | 0 | -2.244408 | 6.046208  | 0.782732  |
| 45 | 8 | 0 | -3.719673 | 5.439678  | -0.651045 |
| 46 | 6 | 0 | 4.120819  | -1.062115 | 0.172871  |
| 47 | 1 | 0 | 4.267397  | -1.837967 | 0.934401  |
| 48 | 1 | 0 | 3.993821  | -1.582901 | -0.783964 |
| 49 | 6 | 0 | 5.363672  | -0.177284 | 0.108371  |
| 50 | 1 | 0 | 5.490369  | 0.334077  | 1.070475  |
| 51 | 1 | 0 | 5.210454  | 0.606978  | -0.643101 |
| 52 | 6 | 0 | 6.639671  | -0.947862 | -0.221845 |
| 53 | 1 | 0 | 6.788788  | -1.738226 | 0.524080  |
| 54 | 1 | 0 | 6.519730  | -1.450206 | -1.189666 |
| 55 | 6 | 0 | 7.877981  | -0.055646 | -0.265826 |
| 56 | 1 | 0 | 7.997788  | 0.444638  | 0.703294  |
| 57 | 1 | 0 | 7.726992  | 0.737516  | -1.008623 |
| 58 | 6 | 0 | 9.160118  | -0.815468 | -0.598353 |
| 59 | 1 | 0 | 9.309965  | -1.609444 | 0.141726  |
| 60 | 1 | 0 | 9.043470  | -1.310756 | -1.568814 |
| 61 | 6 | 0 | 10.386257 | 0.092110  | -0.630729 |
| 62 | 1 | 0 | 10.541072 | 0.572627  | 0.339746  |
| 63 | 1 | 0 | 11.293016 | -0.466206 | -0.876047 |
| 64 | 1 | 0 | 10.267763 | 0.881976  | -1.378246 |

### Structure 38a (M06-2X, Gas Phase)

Energy (Hartrees): = -1251.9733112  
 No imaginary frequencies

Standard orientation:

| Center<br>Number | Atomic<br>Number | Atomic<br>Type | Coordinates (Angstroms) |           |           |
|------------------|------------------|----------------|-------------------------|-----------|-----------|
|                  |                  |                | X                       | Y         | Z         |
| 1                | 6                | 0              | -0.514659               | 2.108180  | 0.292776  |
| 2                | 6                | 0              | -1.464488               | 3.010617  | -0.183337 |
| 3                | 6                | 0              | -1.187512               | 4.373219  | -0.215439 |
| 4                | 6                | 0              | 0.037568                | 4.849824  | 0.237226  |
| 5                | 6                | 0              | 0.982354                | 3.958328  | 0.734540  |
| 6                | 6                | 0              | 0.703761                | 2.596981  | 0.764877  |
| 7                | 1                | 0              | -2.433964               | 2.643814  | -0.499821 |
| 8                | 1                | 0              | -1.935179               | 5.065081  | -0.585090 |
| 9                | 1                | 0              | 1.932227                | 4.323867  | 1.106657  |
| 10               | 1                | 0              | 1.439295                | 1.908604  | 1.169049  |
| 11               | 6                | 0              | -0.785124               | 0.610335  | 0.285506  |
| 12               | 1                | 0              | -0.366307               | 0.157440  | 1.188705  |
| 13               | 7                | 0              | -0.279183               | -0.106658 | -0.899961 |
| 14               | 8                | 0              | -2.170572               | 0.349831  | 0.247306  |
| 15               | 6                | 0              | -2.565704               | -0.024209 | -1.086845 |
| 16               | 6                | 0              | -1.295007               | 0.166451  | -1.915811 |
| 17               | 1                | 0              | -1.216958               | -0.559094 | -2.726872 |
| 18               | 1                | 0              | -1.220225               | 1.184437  | -2.322940 |
| 19               | 1                | 0              | -3.383177               | 0.626864  | -1.391446 |
| 20               | 6                | 0              | -3.048879               | -1.475424 | -1.093476 |

|    |   |   |           |           |           |
|----|---|---|-----------|-----------|-----------|
| 21 | 1 | 0 | -3.605499 | -1.649302 | -2.023669 |
| 22 | 6 | 0 | -3.953751 | -1.845155 | 0.085752  |
| 23 | 1 | 0 | -3.416485 | -1.619148 | 1.014786  |
| 24 | 6 | 0 | -5.298443 | -1.121183 | 0.104127  |
| 25 | 1 | 0 | -5.838928 | -1.369594 | -0.814289 |
| 26 | 6 | 0 | -6.127225 | -1.559653 | 1.300723  |
| 27 | 1 | 0 | -7.116779 | -1.094623 | 1.229343  |
| 28 | 1 | 0 | -6.220077 | -2.649002 | 1.305573  |
| 29 | 8 | 0 | -1.964667 | -2.399981 | -1.092829 |
| 30 | 1 | 0 | -1.180953 | -1.937097 | -0.755698 |
| 31 | 8 | 0 | -4.245270 | -3.228847 | 0.003333  |
| 32 | 1 | 0 | -3.405294 | -3.654722 | -0.202185 |
| 33 | 8 | 0 | -5.139372 | 0.284664  | 0.126382  |
| 34 | 1 | 0 | -4.734251 | 0.495433  | 0.976739  |
| 35 | 8 | 0 | -5.431156 | -1.086024 | 2.447757  |
| 36 | 1 | 0 | -5.941752 | -1.295842 | 3.230806  |
| 37 | 6 | 0 | 1.097282  | 0.127843  | -1.314096 |
| 38 | 1 | 0 | 1.211537  | -0.325202 | -2.303581 |
| 39 | 1 | 0 | 1.308839  | 1.202058  | -1.428867 |
| 40 | 6 | 0 | 2.101837  | -0.518660 | -0.365737 |
| 41 | 1 | 0 | 1.946504  | -0.160680 | 0.657521  |
| 42 | 1 | 0 | 1.916903  | -1.597459 | -0.345093 |
| 43 | 6 | 0 | 3.543921  | -0.240557 | -0.781199 |
| 44 | 1 | 0 | 3.703995  | -0.606062 | -1.802798 |
| 45 | 1 | 0 | 3.712491  | 0.842868  | -0.810832 |
| 46 | 6 | 0 | 4.566076  | -0.885448 | 0.151723  |
| 47 | 1 | 0 | 4.427949  | -0.492669 | 1.166457  |
| 48 | 1 | 0 | 4.374282  | -1.963391 | 0.210139  |
| 49 | 6 | 0 | 6.009457  | -0.653371 | -0.288088 |
| 50 | 1 | 0 | 6.152217  | -1.069330 | -1.292779 |
| 51 | 1 | 0 | 6.195966  | 0.424187  | -0.371528 |
| 52 | 6 | 0 | 7.031731  | -1.270401 | 0.663118  |
| 53 | 1 | 0 | 6.834937  | -2.345015 | 0.760839  |
| 54 | 1 | 0 | 6.900297  | -0.841920 | 1.664324  |
| 55 | 6 | 0 | 8.475772  | -1.062624 | 0.212112  |
| 56 | 1 | 0 | 8.607244  | -1.499397 | -0.783800 |
| 57 | 1 | 0 | 8.668730  | 0.010402  | 0.106092  |
| 58 | 6 | 0 | 9.485882  | -1.674529 | 1.179492  |
| 59 | 1 | 0 | 10.511916 | -1.521538 | 0.839879  |
| 60 | 1 | 0 | 9.390792  | -1.229236 | 2.173285  |
| 61 | 1 | 0 | 9.322932  | -2.750579 | 1.281658  |
| 62 | 1 | 0 | 0.250259  | 5.911911  | 0.215911  |

### Structure 38a (M06-2X, Benzene)

Energy (Hartrees): = -1252.0002689  
No imaginary frequencies

Standard orientation:

| Center Number | Atomic Number | Atomic Type | Coordinates (Angstroms) |           |           |
|---------------|---------------|-------------|-------------------------|-----------|-----------|
|               |               |             | X                       | Y         | Z         |
| 1             | 6             | 0           | -0.514261               | 2.122087  | 0.289979  |
| 2             | 6             | 0           | -1.446624               | 3.041545  | -0.189689 |
| 3             | 6             | 0           | -1.155652               | 4.401981  | -0.197998 |
| 4             | 6             | 0           | 0.067137                | 4.859481  | 0.280990  |
| 5             | 6             | 0           | 0.995647                | 3.950683  | 0.778735  |
| 6             | 6             | 0           | 0.702671                | 2.591588  | 0.786352  |
| 7             | 1             | 0           | -2.413763               | 2.690949  | -0.531353 |
| 8             | 1             | 0           | -1.890469               | 5.106477  | -0.570376 |
| 9             | 1             | 0           | 1.944493                | 4.301182  | 1.168310  |
| 10            | 1             | 0           | 1.426117                | 1.890091  | 1.190099  |
| 11            | 6             | 0           | -0.798103               | 0.626407  | 0.262414  |
| 12            | 1             | 0           | -0.381620               | 0.159369  | 1.159157  |
| 13            | 7             | 0           | -0.302294               | -0.081303 | -0.931920 |
| 14            | 8             | 0           | -2.189243               | 0.381201  | 0.222502  |
| 15            | 6             | 0           | -2.585158               | 0.001662  | -1.110241 |
| 16            | 6             | 0           | -1.319650               | 0.207874  | -1.941987 |
| 17            | 1             | 0           | -1.242816               | -0.501771 | -2.766897 |
| 18            | 1             | 0           | -1.249487               | 1.231996  | -2.332842 |
| 19            | 1             | 0           | -3.409178               | 0.644525  | -1.413273 |
| 20            | 6             | 0           | -3.052896               | -1.456073 | -1.118009 |
| 21            | 1             | 0           | -3.623564               | -1.628946 | -2.039630 |
| 22            | 6             | 0           | -3.928754               | -1.847637 | 0.076566  |
| 23            | 1             | 0           | -3.372350               | -1.624116 | 0.994730  |
| 24            | 6             | 0           | -5.282956               | -1.144041 | 0.138461  |
| 25            | 1             | 0           | -5.848218               | -1.393382 | -0.764754 |
| 26            | 6             | 0           | -6.072281               | -1.597230 | 1.355116  |
| 27            | 1             | 0           | -7.061718               | -1.127326 | 1.323581  |
| 28            | 1             | 0           | -6.179102               | -2.685761 | 1.346655  |
| 29            | 8             | 0           | -1.957118               | -2.369468 | -1.139507 |
| 30            | 1             | 0           | -1.171713               | -1.890678 | -0.824315 |
| 31            | 8             | 0           | -4.199573               | -3.237155 | -0.010510 |
| 32            | 1             | 0           | -3.354139               | -3.644012 | -0.233301 |
| 33            | 8             | 0           | -5.139888               | 0.265094  | 0.163073  |

|    |   |   |           |           |           |
|----|---|---|-----------|-----------|-----------|
| 34 | 1 | 0 | -4.665205 | 0.473441  | 0.977578  |
| 35 | 8 | 0 | -5.339813 | -1.151826 | 2.490699  |
| 36 | 1 | 0 | -5.851819 | -1.340778 | 3.279813  |
| 37 | 6 | 0 | 1.078245  | 0.138391  | -1.343657 |
| 38 | 1 | 0 | 1.187072  | -0.307584 | -2.336789 |
| 39 | 1 | 0 | 1.303066  | 1.210513  | -1.448028 |
| 40 | 6 | 0 | 2.071734  | -0.527990 | -0.397095 |
| 41 | 1 | 0 | 1.905643  | -0.185890 | 0.629949  |
| 42 | 1 | 0 | 1.884201  | -1.606793 | -0.397518 |
| 43 | 6 | 0 | 3.518453  | -0.246829 | -0.795142 |
| 44 | 1 | 0 | 3.687393  | -0.599202 | -1.820015 |
| 45 | 1 | 0 | 3.688111  | 0.836750  | -0.808624 |
| 46 | 6 | 0 | 4.532816  | -0.903190 | 0.138858  |
| 47 | 1 | 0 | 4.389931  | -0.517760 | 1.155812  |
| 48 | 1 | 0 | 4.337813  | -1.981127 | 0.186523  |
| 49 | 6 | 0 | 5.979628  | -0.671526 | -0.291415 |
| 50 | 1 | 0 | 6.129106  | -1.091743 | -1.293452 |
| 51 | 1 | 0 | 6.165192  | 0.406114  | -0.377300 |
| 52 | 6 | 0 | 6.997650  | -1.282586 | 0.668884  |
| 53 | 1 | 0 | 6.796885  | -2.355518 | 0.777393  |
| 54 | 1 | 0 | 6.866222  | -0.841782 | 1.664863  |
| 55 | 6 | 0 | 8.443773  | -1.086178 | 0.218402  |
| 56 | 1 | 0 | 8.577595  | -1.542703 | -0.768532 |
| 57 | 1 | 0 | 8.640150  | -0.015587 | 0.093591  |
| 58 | 6 | 0 | 9.450669  | -1.680852 | 1.198814  |
| 59 | 1 | 0 | 10.478053 | -1.537336 | 0.856858  |
| 60 | 1 | 0 | 9.358119  | -1.215457 | 2.184183  |
| 61 | 1 | 0 | 9.287393  | -2.755022 | 1.323452  |
| 62 | 1 | 0 | 0.291218  | 5.919819  | 0.277802  |

### Structure 38a (M06-2X, DMSO)

Energy (Hartrees): = - 1252.0003521  
 No imaginary frequencies

Standard orientation:

| Center<br>Number | Atomic<br>Number | Atomic<br>Type | Coordinates (Angstroms) |           |           |
|------------------|------------------|----------------|-------------------------|-----------|-----------|
|                  |                  |                | X                       | Y         | Z         |
| 1                | 6                | 0              | -0.469570               | 2.144594  | 0.327690  |
| 2                | 6                | 0              | -1.343226               | 3.062012  | -0.258108 |
| 3                | 6                | 0              | -1.034240               | 4.419120  | -0.272961 |
| 4                | 6                | 0              | 0.146799                | 4.874584  | 0.305932  |
| 5                | 6                | 0              | 1.014762                | 3.967720  | 0.907425  |
| 6                | 6                | 0              | 0.704861                | 2.611009  | 0.920069  |
| 7                | 1                | 0              | -2.278021               | 2.716450  | -0.685314 |
| 8                | 1                | 0              | -1.722207               | 5.123074  | -0.727598 |
| 9                | 1                | 0              | 1.929406                | 4.317252  | 1.372812  |
| 10               | 1                | 0              | 1.377826                | 1.908616  | 1.402256  |
| 11               | 6                | 0              | -0.765758               | 0.652720  | 0.310395  |
| 12               | 1                | 0              | -0.350635               | 0.191545  | 1.210497  |
| 13               | 7                | 0              | -0.270133               | -0.065447 | -0.877296 |
| 14               | 8                | 0              | -2.161538               | 0.418689  | 0.271495  |
| 15               | 6                | 0              | -2.554425               | -0.004294 | -1.048938 |
| 16               | 6                | 0              | -1.294268               | 0.194555  | -1.889837 |
| 17               | 1                | 0              | -1.212436               | -0.529804 | -2.701871 |
| 18               | 1                | 0              | -1.233625               | 1.209062  | -2.304965 |
| 19               | 1                | 0              | -3.388222               | 0.615050  | -1.372230 |
| 20               | 6                | 0              | -2.992724               | -1.468938 | -1.012964 |
| 21               | 1                | 0              | -3.479966               | -1.699214 | -1.970179 |
| 22               | 6                | 0              | -3.962244               | -1.814416 | 0.122796  |
| 23               | 1                | 0              | -3.522636               | -1.467950 | 1.065941  |
| 24               | 6                | 0              | -5.355554               | -1.207083 | -0.028902 |
| 25               | 1                | 0              | -5.776983               | -1.528881 | -0.985862 |
| 26               | 6                | 0              | -6.280185               | -1.650690 | 1.091283  |
| 27               | 1                | 0              | -7.278699               | -1.243930 | 0.900636  |
| 28               | 1                | 0              | -6.332701               | -2.741945 | 1.130710  |
| 29               | 8                | 0              | -1.877349               | -2.349916 | -0.875426 |
| 30               | 1                | 0              | -1.092407               | -1.804282 | -0.681590 |
| 31               | 8                | 0              | -4.129357               | -3.224818 | 0.147720  |
| 32               | 1                | 0              | -3.240440               | -3.579422 | 0.022964  |
| 33               | 8                | 0              | -5.298442               | 0.210843  | -0.053081 |
| 34               | 1                | 0              | -5.038390               | 0.476471  | 0.838156  |
| 35               | 8                | 0              | -5.740342               | -1.111438 | 2.294588  |
| 36               | 1                | 0              | -6.403407               | -1.192659 | 2.986000  |
| 37               | 6                | 0              | 1.106995                | 0.168372  | -1.296874 |
| 38               | 1                | 0              | 1.217101                | -0.284023 | -2.286703 |
| 39               | 1                | 0              | 1.315121                | 1.243124  | -1.410046 |
| 40               | 6                | 0              | 2.110314                | -0.474998 | -0.346363 |
| 41               | 1                | 0              | 1.953563                | -0.110014 | 0.673916  |
| 42               | 1                | 0              | 1.926691                | -1.554917 | -0.327531 |
| 43               | 6                | 0              | 3.552155                | -0.200655 | -0.764332 |
| 44               | 1                | 0              | 3.698834                | -0.532014 | -1.799728 |
| 45               | 1                | 0              | 3.734585                | 0.880889  | -0.752948 |

|    |   |   |           |           |           |
|----|---|---|-----------|-----------|-----------|
| 46 | 6 | 0 | 4.570419  | -0.895458 | 0.136421  |
| 47 | 1 | 0 | 4.432012  | -0.553814 | 1.169551  |
| 48 | 1 | 0 | 4.374259  | -1.974592 | 0.136000  |
| 49 | 6 | 0 | 6.015758  | -0.647768 | -0.288240 |
| 50 | 1 | 0 | 6.151253  | -0.989253 | -1.321883 |
| 51 | 1 | 0 | 6.215065  | 0.430904  | -0.287565 |
| 52 | 6 | 0 | 7.031591  | -1.349277 | 0.610036  |
| 53 | 1 | 0 | 6.825246  | -2.426807 | 0.617223  |
| 54 | 1 | 0 | 6.904208  | -1.001299 | 1.642679  |
| 55 | 6 | 0 | 8.477809  | -1.119338 | 0.177543  |
| 56 | 1 | 0 | 8.604427  | -1.470859 | -0.852478 |
| 57 | 1 | 0 | 8.684066  | -0.043260 | 0.167460  |
| 58 | 6 | 0 | 9.480678  | -1.824921 | 1.085582  |
| 59 | 1 | 0 | 10.508754 | -1.658407 | 0.754965  |
| 60 | 1 | 0 | 9.397816  | -1.462993 | 2.114517  |
| 61 | 1 | 0 | 9.303832  | -2.904311 | 1.096787  |
| 62 | 1 | 0 | 0.384183  | 5.932356  | 0.298226  |

### Structure 38b (M06-2X, Gas Phase)

Energy (Hartrees): = - 1251.9776092

No imaginary frequencies

Standard orientation:

| Center<br>Number | Atomic<br>Number | Atomic<br>Type | Coordinates (Angstroms) |           |           |
|------------------|------------------|----------------|-------------------------|-----------|-----------|
|                  |                  |                | X                       | Y         | Z         |
| 1                | 6                | 0              | -1.215700               | 2.186082  | -0.416984 |
| 2                | 6                | 0              | -1.744696               | 2.135805  | 0.872155  |
| 3                | 6                | 0              | -1.861758               | 3.298860  | 1.619741  |
| 4                | 6                | 0              | -1.449269               | 4.518663  | 1.087222  |
| 5                | 6                | 0              | -0.922601               | 4.571766  | -0.196606 |
| 6                | 6                | 0              | -0.811747               | 3.405125  | -0.948818 |
| 7                | 1                | 0              | -2.066626               | 1.182999  | 1.277771  |
| 8                | 1                | 0              | -2.277627               | 3.256768  | 2.619319  |
| 9                | 1                | 0              | -0.604487               | 5.518689  | -0.616235 |
| 10               | 1                | 0              | -0.412611               | 3.443945  | -1.957607 |
| 11               | 6                | 0              | -1.068885               | 0.916508  | -1.214265 |
| 12               | 1                | 0              | -0.853508               | 1.164258  | -2.270851 |
| 13               | 7                | 0              | -0.020956               | 0.037080  | -0.686102 |
| 14               | 8                | 0              | -2.241721               | 0.135251  | -1.147563 |
| 15               | 6                | 0              | -1.888707               | -1.253711 | -1.062830 |
| 16               | 6                | 0              | -0.373286               | -1.256873 | -1.271654 |
| 17               | 1                | 0              | 0.117740                | -2.077015 | -0.745991 |
| 18               | 1                | 0              | -0.115362               | -1.299222 | -2.341966 |
| 19               | 1                | 0              | -2.426291               | -1.793597 | -1.838893 |
| 20               | 6                | 0              | -2.286131               | -1.806121 | 0.306797  |
| 21               | 1                | 0              | -2.202405               | -2.901563 | 0.269900  |
| 22               | 6                | 0              | -3.711017               | -1.448502 | 0.743853  |
| 23               | 1                | 0              | -3.836266               | -0.360968 | 0.668119  |
| 24               | 6                | 0              | -4.806053               | -2.127453 | -0.075827 |
| 25               | 1                | 0              | -4.670948               | -3.211213 | -0.007929 |
| 26               | 6                | 0              | -6.181605               | -1.764515 | 0.459233  |
| 27               | 1                | 0              | -6.934933               | -2.347662 | -0.082115 |
| 28               | 1                | 0              | -6.230288               | -1.981822 | 1.529194  |
| 29               | 8                | 0              | -1.419936               | -1.348549 | 1.343925  |
| 30               | 1                | 0              | -0.806035               | -0.691401 | 0.974723  |
| 31               | 8                | 0              | -3.886626               | -1.880503 | 2.081707  |
| 32               | 1                | 0              | -3.078737               | -1.627520 | 2.542644  |
| 33               | 8                | 0              | -4.722844               | -1.779699 | -1.444523 |
| 34               | 1                | 0              | -4.992970               | -0.854731 | -1.500913 |
| 35               | 8                | 0              | -6.340252               | -0.374858 | 0.196541  |
| 36               | 1                | 0              | -7.208532               | -0.097634 | 0.491474  |
| 37               | 6                | 0              | 1.327295                | 0.507624  | -0.973986 |
| 38               | 1                | 0              | 1.477652                | 0.597384  | -2.065269 |
| 39               | 1                | 0              | 1.422761                | 1.511200  | -0.547821 |
| 40               | 6                | 0              | 2.398973                | -0.398715 | -0.382453 |
| 41               | 1                | 0              | 2.175642                | -0.564904 | 0.676860  |
| 42               | 1                | 0              | 2.371200                | -1.378103 | -0.872534 |
| 43               | 6                | 0              | 3.796453                | 0.197366  | -0.534959 |
| 44               | 1                | 0              | 3.838649                | 1.159577  | -0.011267 |
| 45               | 1                | 0              | 3.989482                | 0.411908  | -1.593147 |
| 46               | 6                | 0              | 4.895540                | -0.717005 | 0.000541  |
| 47               | 1                | 0              | 4.866930                | -1.672273 | -0.537166 |
| 48               | 1                | 0              | 4.692738                | -0.948790 | 1.052931  |
| 49               | 6                | 0              | 6.290325                | -0.108693 | -0.123764 |
| 50               | 1                | 0              | 6.319675                | 0.842738  | 0.420802  |
| 51               | 1                | 0              | 6.489104                | 0.131715  | -1.175343 |
| 52               | 6                | 0              | 7.393688                | -1.023976 | 0.400959  |
| 53               | 1                | 0              | 7.192644                | -1.269844 | 1.450870  |
| 54               | 1                | 0              | 7.369751                | -1.973576 | -0.147432 |
| 55               | 6                | 0              | 8.787765                | -0.411299 | 0.285425  |
| 56               | 1                | 0              | 8.986262                | -0.164609 | -0.763262 |
| 57               | 1                | 0              | 8.810156                | 0.535830  | 0.835055  |
| 58               | 6                | 0              | 9.881268                | -1.337626 | 0.811504  |

|    |   |   |           |           |          |
|----|---|---|-----------|-----------|----------|
| 59 | 1 | 0 | 9.890797  | -2.280338 | 0.258313 |
| 60 | 1 | 0 | 10.870420 | -0.885092 | 0.719209 |
| 61 | 1 | 0 | 9.716501  | -1.573317 | 1.866056 |
| 62 | 1 | 0 | -1.541868 | 5.425629  | 1.672820 |

-----  
**Structure 38b (M06-2X, Benzene)**

Energy (Hartrees): = - 1252.0047379  
 No imaginary frequencies

Standard orientation:

| Center<br>Number | Atomic<br>Number | Atomic<br>Type | Coordinates (Angstroms) |           |           |
|------------------|------------------|----------------|-------------------------|-----------|-----------|
|                  |                  |                | X                       | Y         | Z         |
| 1                | 6                | 0              | -1.205741               | 2.215648  | -0.421961 |
| 2                | 6                | 0              | -1.786837               | 2.187047  | 0.845505  |
| 3                | 6                | 0              | -1.908410               | 3.358247  | 1.580638  |
| 4                | 6                | 0              | -1.446299               | 4.564654  | 1.057936  |
| 5                | 6                | 0              | -0.865331               | 4.596086  | -0.203593 |
| 6                | 6                | 0              | -0.751312               | 3.422142  | -0.944090 |
| 7                | 1                | 0              | -2.144767               | 1.244559  | 1.245203  |
| 8                | 1                | 0              | -2.366603               | 3.332892  | 2.562430  |
| 9                | 1                | 0              | -0.507386               | 5.532587  | -0.615376 |
| 10               | 1                | 0              | -0.309721               | 3.444877  | -1.935704 |
| 11               | 6                | 0              | -1.054058               | 0.938032  | -1.207243 |
| 12               | 1                | 0              | -0.829160               | 1.176297  | -2.262951 |
| 13               | 7                | 0              | -0.015244               | 0.056503  | -0.664156 |
| 14               | 8                | 0              | -2.233117               | 0.161912  | -1.143808 |
| 15               | 6                | 0              | -1.886349               | -1.228372 | -1.047773 |
| 16               | 6                | 0              | -0.370554               | -1.238321 | -1.248783 |
| 17               | 1                | 0              | 0.115828                | -2.059698 | -0.721235 |
| 18               | 1                | 0              | -0.109271               | -1.283069 | -2.317719 |
| 19               | 1                | 0              | -2.418695               | -1.773801 | -1.823480 |
| 20               | 6                | 0              | -2.292858               | -1.771239 | 0.322867  |
| 21               | 1                | 0              | -2.185625               | -2.864987 | 0.299109  |
| 22               | 6                | 0              | -3.730687               | -1.434585 | 0.738630  |
| 23               | 1                | 0              | -3.884435               | -0.354736 | 0.618713  |
| 24               | 6                | 0              | -4.804180               | -2.178952 | -0.053821 |
| 25               | 1                | 0              | -4.641093               | -3.254554 | 0.063361  |
| 26               | 6                | 0              | -6.194249               | -1.831152 | 0.452330  |
| 27               | 1                | 0              | -6.926503               | -2.463538 | -0.062211 |
| 28               | 1                | 0              | -6.252292               | -1.997673 | 1.530993  |
| 29               | 8                | 0              | -1.448214               | -1.278138 | 1.362970  |
| 30               | 1                | 0              | -0.821312               | -0.639528 | 0.979857  |
| 31               | 8                | 0              | -3.901557               | -1.813649 | 2.095133  |
| 32               | 1                | 0              | -3.098720               | -1.523870 | 2.543906  |
| 33               | 8                | 0              | -4.723334               | -1.889997 | -1.438269 |
| 34               | 1                | 0              | -5.045004               | -0.985066 | -1.537159 |
| 35               | 8                | 0              | -6.395203               | -0.461301 | 0.120609  |
| 36               | 1                | 0              | -7.284619               | -0.207345 | 0.375544  |
| 37               | 6                | 0              | 1.339442                | 0.515769  | -0.948720 |
| 38               | 1                | 0              | 1.491749                | 0.601979  | -2.039344 |
| 39               | 1                | 0              | 1.443892                | 1.518552  | -0.523491 |
| 40               | 6                | 0              | 2.403115                | -0.398288 | -0.353999 |
| 41               | 1                | 0              | 2.181092                | -0.556711 | 0.706969  |
| 42               | 1                | 0              | 2.365731                | -1.379233 | -0.840361 |
| 43               | 6                | 0              | 3.804913                | 0.187054  | -0.513257 |
| 44               | 1                | 0              | 3.854774                | 1.151327  | 0.006150  |
| 45               | 1                | 0              | 3.994883                | 0.394717  | -1.573447 |
| 46               | 6                | 0              | 4.901571                | -0.731237 | 0.021841  |
| 47               | 1                | 0              | 4.861595                | -1.690767 | -0.507808 |
| 48               | 1                | 0              | 4.705854                | -0.951692 | 1.078064  |
| 49               | 6                | 0              | 6.300213                | -0.134118 | -0.120103 |
| 50               | 1                | 0              | 6.340929                | 0.822061  | 0.415637  |
| 51               | 1                | 0              | 6.490774                | 0.094692  | -1.175859 |
| 52               | 6                | 0              | 7.403400                | -1.051628 | 0.402595  |
| 53               | 1                | 0              | 7.213197                | -1.283368 | 1.457784  |
| 54               | 1                | 0              | 7.366105                | -2.007265 | -0.134770 |
| 55               | 6                | 0              | 8.801481                | -0.451959 | 0.263746  |
| 56               | 1                | 0              | 8.990759                | -0.218561 | -0.789870 |
| 57               | 1                | 0              | 8.840275                | 0.500343  | 0.803921  |
| 58               | 6                | 0              | 9.893910                | -1.380542 | 0.785845  |
| 59               | 1                | 0              | 9.895163                | -2.328551 | 0.240607  |
| 60               | 1                | 0              | 10.885355               | -0.934306 | 0.679257  |
| 61               | 1                | 0              | 9.741688                | -1.606653 | 1.844866  |
| 62               | 1                | 0              | -1.543409               | 5.478232  | 1.632881  |

-----  
**Structure 38b (M06-2X, DMSO)**

Energy (Hartrees): = - 1252.0050186  
 No imaginary frequencies

Standard orientation:



| Center<br>Number | Atomic<br>Number | Atomic<br>Type | Coordinates (Angstroms) |           |           |
|------------------|------------------|----------------|-------------------------|-----------|-----------|
|                  |                  |                | X                       | Y         | Z         |
| 1                | 6                | 0              | -1.219532               | 2.194131  | -0.425675 |
| 2                | 6                | 0              | -1.771414               | 2.144593  | 0.855541  |
| 3                | 6                | 0              | -1.901515               | 3.308059  | 1.603530  |
| 4                | 6                | 0              | -1.479046               | 4.528948  | 1.078321  |
| 5                | 6                | 0              | -0.928236               | 4.581347  | -0.197024 |
| 6                | 6                | 0              | -0.803427               | 3.414620  | -0.948971 |
| 7                | 1                | 0              | -2.100569               | 1.192942  | 1.259775  |
| 8                | 1                | 0              | -2.333147               | 3.265472  | 2.597067  |
| 9                | 1                | 0              | -0.599213               | 5.528237  | -0.609724 |
| 10               | 1                | 0              | -0.382089               | 3.452163  | -1.948849 |
| 11               | 6                | 0              | -1.059188               | 0.927209  | -1.227133 |
| 12               | 1                | 0              | -0.833221               | 1.178916  | -2.277649 |
| 13               | 7                | 0              | -0.019294               | 0.044071  | -0.690464 |
| 14               | 8                | 0              | -2.239481               | 0.145575  | -1.173919 |
| 15               | 6                | 0              | -1.884472               | -1.244854 | -1.077383 |
| 16               | 6                | 0              | -0.372354               | -1.245614 | -1.293627 |
| 17               | 1                | 0              | 0.124212                | -2.073217 | -0.786164 |
| 18               | 1                | 0              | -0.122073               | -1.268177 | -2.364484 |
| 19               | 1                | 0              | -2.418790               | -1.794665 | -1.847945 |
| 20               | 6                | 0              | -2.274137               | -1.791928 | 0.297432  |
| 21               | 1                | 0              | -2.184859               | -2.886239 | 0.260763  |
| 22               | 6                | 0              | -3.697170               | -1.431128 | 0.742919  |
| 23               | 1                | 0              | -3.835560               | -0.350379 | 0.615077  |
| 24               | 6                | 0              | -4.800579               | -2.166580 | -0.015622 |
| 25               | 1                | 0              | -4.655061               | -3.243163 | 0.113102  |
| 26               | 6                | 0              | -6.174964               | -1.784948 | 0.507177  |
| 27               | 1                | 0              | -6.927224               | -2.398801 | 0.001326  |
| 28               | 1                | 0              | -6.232378               | -1.952646 | 1.585729  |
| 29               | 8                | 0              | -1.398127               | -1.320488 | 1.324649  |
| 30               | 1                | 0              | -0.783043               | -0.676033 | 0.927910  |
| 31               | 8                | 0              | -3.841982               | -1.787181 | 2.110722  |
| 32               | 1                | 0              | -3.018643               | -1.508290 | 2.529279  |
| 33               | 8                | 0              | -4.741626               | -1.896891 | -1.406980 |
| 34               | 1                | 0              | -5.057551               | -0.989746 | -1.507120 |
| 35               | 8                | 0              | -6.351818               | -0.407765 | 0.183544  |
| 36               | 1                | 0              | -7.279080               | -0.183961 | 0.303037  |
| 37               | 6                | 0              | 1.334282                | 0.509686  | -0.981132 |
| 38               | 1                | 0              | 1.475940                | 0.605149  | -2.070866 |
| 39               | 1                | 0              | 1.441360                | 1.508946  | -0.547357 |
| 40               | 6                | 0              | 2.400981                | -0.409092 | -0.400549 |
| 41               | 1                | 0              | 2.176088                | -0.593370 | 0.656251  |
| 42               | 1                | 0              | 2.374506                | -1.378209 | -0.910248 |
| 43               | 6                | 0              | 3.797286                | 0.193795  | -0.536051 |
| 44               | 1                | 0              | 3.831556                | 1.147361  | 0.004175  |
| 45               | 1                | 0              | 3.993477                | 0.423404  | -1.590523 |
| 46               | 6                | 0              | 4.896565                | -0.724660 | -0.008228 |
| 47               | 1                | 0              | 4.873942                | -1.671675 | -0.560989 |
| 48               | 1                | 0              | 4.689839                | -0.969633 | 1.040865  |
| 49               | 6                | 0              | 6.290060                | -0.109979 | -0.117411 |
| 50               | 1                | 0              | 6.311493                | 0.836150  | 0.437236  |
| 51               | 1                | 0              | 6.494914                | 0.138236  | -1.166243 |
| 52               | 6                | 0              | 7.392677                | -1.026116 | 0.407605  |
| 53               | 1                | 0              | 7.187789                | -1.275474 | 1.456295  |
| 54               | 1                | 0              | 7.372870                | -1.972458 | -0.147105 |
| 55               | 6                | 0              | 8.787331                | -0.413074 | 0.301372  |
| 56               | 1                | 0              | 8.993784                | -0.167144 | -0.746330 |
| 57               | 1                | 0              | 8.808319                | 0.532556  | 0.854424  |
| 58               | 6                | 0              | 9.875463                | -1.340718 | 0.833499  |
| 59               | 1                | 0              | 9.887842                | -2.284364 | 0.280257  |
| 60               | 1                | 0              | 10.867158               | -0.890238 | 0.745198  |
| 61               | 1                | 0              | 9.706298                | -1.574478 | 1.888575  |
| 62               | 1                | 0              | -1.581218               | 5.436141  | 1.662843  |

### Structure 38c (M06-2X, Gas Phase)

Energy (Hartrees): = - 1251.9748609  
 No imaginary frequencies

Standard orientation:

| Center<br>Number | Atomic<br>Number | Atomic<br>Type | Coordinates (Angstroms) |           |           |
|------------------|------------------|----------------|-------------------------|-----------|-----------|
|                  |                  |                | X                       | Y         | Z         |
| 1                | 6                | 0              | 2.010780                | -1.623317 | -0.025942 |
| 2                | 6                | 0              | 0.703572                | -1.398360 | -0.777858 |
| 3                | 6                | 0              | 2.947698                | -0.464514 | -0.372142 |
| 4                | 1                | 0              | -0.003678               | -2.183694 | -0.507311 |
| 5                | 1                | 0              | 0.876377                | -1.445631 | -1.867859 |
| 6                | 1                | 0              | 2.470909                | -2.568071 | -0.310497 |
| 7                | 1                | 0              | 3.145506                | -0.448800 | -1.455553 |
| 8                | 8                | 0              | 2.286842                | 0.750134  | -0.009158 |
| 9                | 7                | 0              | 0.139080                | -0.102820 | -0.389737 |
| 10               | 6                | 0              | 4.273125                | -0.450849 | 0.387998  |

|    |   |   |            |           |           |
|----|---|---|------------|-----------|-----------|
| 11 | 1 | 0 | 4.069055   | -0.739626 | 1.426944  |
| 12 | 6 | 0 | 5.293422   | -1.403972 | -0.213829 |
| 13 | 1 | 0 | 5.499287   | -1.081740 | -1.245122 |
| 14 | 6 | 0 | 6.597875   | -1.368163 | 0.561393  |
| 15 | 1 | 0 | 6.390286   | -1.603305 | 1.612724  |
| 16 | 1 | 0 | 7.049101   | -0.376134 | 0.486193  |
| 17 | 8 | 0 | 4.864074   | 0.832681  | 0.319266  |
| 18 | 1 | 0 | 4.147425   | 1.467043  | 0.428959  |
| 19 | 8 | 0 | 4.766968   | -2.715322 | -0.199321 |
| 20 | 1 | 0 | 5.520815   | -3.298532 | -0.342649 |
| 21 | 8 | 0 | 7.416234   | -2.372564 | -0.030060 |
| 22 | 1 | 0 | 8.200459   | -2.492175 | 0.507440  |
| 23 | 8 | 0 | 1.763021   | -1.672477 | 1.362712  |
| 24 | 1 | 0 | 1.211828   | -0.903320 | 1.550950  |
| 25 | 6 | 0 | -1.196250  | 0.088545  | -0.961957 |
| 26 | 1 | 0 | -1.240563  | -0.318121 | -1.986439 |
| 27 | 1 | 0 | -1.398949  | 1.158963  | -1.038658 |
| 28 | 6 | 0 | 0.568025   | 2.320242  | -0.263120 |
| 29 | 6 | 0 | 0.117209   | 2.485610  | 1.046188  |
| 30 | 6 | 0 | 0.577991   | 3.406763  | -1.129305 |
| 31 | 6 | 0 | -0.326417  | 3.727427  | 1.478655  |
| 32 | 1 | 0 | 0.113001   | 1.630377  | 1.711909  |
| 33 | 6 | 0 | 0.133206   | 4.653512  | -0.696552 |
| 34 | 1 | 0 | 0.934222   | 3.278949  | -2.146050 |
| 35 | 6 | 0 | -0.320025  | 4.813830  | 0.606546  |
| 36 | 1 | 0 | -0.677469  | 3.851687  | 2.496150  |
| 37 | 1 | 0 | 0.141523   | 5.496677  | -1.376756 |
| 38 | 6 | 0 | 1.076712   | 0.970500  | -0.706991 |
| 39 | 1 | 0 | 1.300333   | 0.989134  | -1.792991 |
| 40 | 6 | 0 | -2.281475  | -0.543847 | -0.097216 |
| 41 | 1 | 0 | -2.063997  | -1.603794 | 0.070851  |
| 42 | 1 | 0 | -2.257711  | -0.059193 | 0.884463  |
| 43 | 6 | 0 | -3.668306  | -0.400513 | -0.718672 |
| 44 | 1 | 0 | -3.866120  | 0.658114  | -0.926940 |
| 45 | 1 | 0 | -3.690414  | -0.915029 | -1.686976 |
| 46 | 6 | 0 | -4.780067  | -0.951849 | 0.170794  |
| 47 | 1 | 0 | -4.765518  | -0.426899 | 1.133343  |
| 48 | 1 | 0 | -4.579098  | -2.006991 | 0.391985  |
| 49 | 6 | 0 | -6.166713  | -0.821170 | -0.454552 |
| 50 | 1 | 0 | -6.360723  | 0.232672  | -0.688740 |
| 51 | 1 | 0 | -6.185090  | -1.357773 | -1.410869 |
| 52 | 6 | 0 | -7.282472  | -1.350761 | 0.442782  |
| 53 | 1 | 0 | -7.268090  | -0.810048 | 1.396973  |
| 54 | 1 | 0 | -7.087176  | -2.403143 | 0.682761  |
| 55 | 6 | 0 | -8.669166  | -1.226244 | -0.184668 |
| 56 | 1 | 0 | -8.861028  | -0.175258 | -0.426726 |
| 57 | 1 | 0 | -8.683214  | -1.769655 | -1.135554 |
| 58 | 6 | 0 | -9.774840  | -1.753994 | 0.726187  |
| 59 | 1 | 0 | -9.792708  | -1.206483 | 1.672108  |
| 60 | 1 | 0 | -10.758746 | -1.655487 | 0.263547  |
| 61 | 1 | 0 | -9.616353  | -2.810509 | 0.957421  |
| 62 | 1 | 0 | -0.667462  | 5.782654  | 0.945177  |

### Structure 38c (M06-2X, Benzene)

Energy (Hartrees): = - 1252.0022785  
 No imaginary frequencies

Standard orientation:

| Center<br>Number | Atomic<br>Number | Atomic<br>Type | Coordinates (Angstroms) |           |           |
|------------------|------------------|----------------|-------------------------|-----------|-----------|
|                  |                  |                | X                       | Y         | Z         |
| 1                | 6                | 0              | 2.023969                | -1.621392 | -0.049817 |
| 2                | 6                | 0              | 0.718541                | -1.397398 | -0.804290 |
| 3                | 6                | 0              | 2.955365                | -0.455384 | -0.384254 |
| 4                | 1                | 0              | 0.017334                | -2.193643 | -0.551623 |
| 5                | 1                | 0              | 0.898294                | -1.423367 | -1.893088 |
| 6                | 1                | 0              | 2.488165                | -2.562095 | -0.340968 |
| 7                | 1                | 0              | 3.155924                | -0.434511 | -1.466714 |
| 8                | 8                | 0              | 2.286683                | 0.753811  | -0.017296 |
| 9                | 7                | 0              | 0.142891                | -0.112544 | -0.394176 |
| 10               | 6                | 0              | 4.280002                | -0.431314 | 0.377542  |
| 11               | 1                | 0              | 4.077498                | -0.702484 | 1.421296  |
| 12               | 6                | 0              | 5.305072                | -1.392152 | -0.204770 |
| 13               | 1                | 0              | 5.490081                | -1.110627 | -1.252008 |
| 14               | 6                | 0              | 6.622224                | -1.313816 | 0.545676  |
| 15               | 1                | 0              | 6.439268                | -1.509549 | 1.609426  |
| 16               | 1                | 0              | 7.068338                | -0.323670 | 0.426265  |
| 17               | 8                | 0              | 4.864438                | 0.856074  | 0.290357  |
| 18               | 1                | 0              | 4.140684                | 1.485576  | 0.385069  |
| 19               | 8                | 0              | 4.796665                | -2.710014 | -0.129357 |
| 20               | 1                | 0              | 5.559000                | -3.286899 | -0.256053 |
| 21               | 8                | 0              | 7.442606                | -2.331800 | -0.021240 |
| 22               | 1                | 0              | 8.219296                | -2.444877 | 0.530945  |
| 23               | 8                | 0              | 1.768829                | -1.682073 | 1.339126  |

|    |   |   |            |           |           |
|----|---|---|------------|-----------|-----------|
| 24 | 1 | 0 | 1.185731   | -0.934186 | 1.520766  |
| 25 | 6 | 0 | -1.197747  | 0.073445  | -0.958713 |
| 26 | 1 | 0 | -1.235470  | -0.296958 | -1.996884 |
| 27 | 1 | 0 | -1.419315  | 1.141903  | -0.996290 |
| 28 | 6 | 0 | 0.557699   | 2.316492  | -0.260967 |
| 29 | 6 | 0 | 0.215664   | 2.504994  | 1.078215  |
| 30 | 6 | 0 | 0.442708   | 3.373978  | -1.155802 |
| 31 | 6 | 0 | -0.242346  | 3.741457  | 1.512756  |
| 32 | 1 | 0 | 0.310924   | 1.676167  | 1.770464  |
| 33 | 6 | 0 | -0.018209  | 4.614552  | -0.721141 |
| 34 | 1 | 0 | 0.712407   | 3.227366  | -2.196668 |
| 35 | 6 | 0 | -0.361665  | 4.798322  | 0.612451  |
| 36 | 1 | 0 | -0.506561  | 3.884280  | 2.554121  |
| 37 | 1 | 0 | -0.106976  | 5.434123  | -1.424509 |
| 38 | 6 | 0 | 1.071824   | 0.970824  | -0.711544 |
| 39 | 1 | 0 | 1.289616   | 0.993990  | -1.797460 |
| 40 | 6 | 0 | -2.273714  | -0.604848 | -0.116903 |
| 41 | 1 | 0 | -2.057606  | -1.672531 | -0.006072 |
| 42 | 1 | 0 | -2.241988  | -0.169779 | 0.887719  |
| 43 | 6 | 0 | -3.665981  | -0.428228 | -0.719027 |
| 44 | 1 | 0 | -3.854525  | 0.638896  | -0.889082 |
| 45 | 1 | 0 | -3.702759  | -0.910462 | -1.703528 |
| 46 | 6 | 0 | -4.775827  | -0.995869 | 0.163369  |
| 47 | 1 | 0 | -4.747750  | -0.498027 | 1.140141  |
| 48 | 1 | 0 | -4.583816  | -2.058999 | 0.352079  |
| 49 | 6 | 0 | -6.166706  | -0.832488 | -0.446224 |
| 50 | 1 | 0 | -6.345790  | 0.228640  | -0.658702 |
| 51 | 1 | 0 | -6.202239  | -1.351408 | -1.411974 |
| 52 | 6 | 0 | -7.283851  | -1.359915 | 0.451604  |
| 53 | 1 | 0 | -7.253287  | -0.834421 | 1.414049  |
| 54 | 1 | 0 | -7.103431  | -2.419132 | 0.672614  |
| 55 | 6 | 0 | -8.674396  | -1.203664 | -0.161093 |
| 56 | 1 | 0 | -8.851256  | -0.146639 | -0.388607 |
| 57 | 1 | 0 | -8.709017  | -1.736632 | -1.117626 |
| 58 | 6 | 0 | -9.781012  | -1.721608 | 0.752961  |
| 59 | 1 | 0 | -9.787547  | -1.181490 | 1.703885  |
| 60 | 1 | 0 | -10.766866 | -1.604274 | 0.297021  |
| 61 | 1 | 0 | -9.640201  | -2.783107 | 0.974946  |
| 62 | 1 | 0 | -0.719859  | 5.762723  | 0.953380  |

### Structure 38c (M06-2X, DMSO)

Energy (Hartrees): = - 1252.0025953

No imaginary frequencies

Standard orientation:

| Center<br>Number | Atomic<br>Number | Atomic<br>Type | Coordinates (Angstroms) |           |           |
|------------------|------------------|----------------|-------------------------|-----------|-----------|
|                  |                  |                | X                       | Y         | Z         |
| 1                | 6                | 0              | 1.996741                | -1.613748 | -0.075345 |
| 2                | 6                | 0              | 0.696463                | -1.366346 | -0.829263 |
| 3                | 6                | 0              | 2.943734                | -0.459058 | -0.400055 |
| 4                | 1                | 0              | -0.018175               | -2.155995 | -0.592034 |
| 5                | 1                | 0              | 0.882045                | -1.378580 | -1.916024 |
| 6                | 1                | 0              | 2.445200                | -2.558372 | -0.377121 |
| 7                | 1                | 0              | 3.141323                | -0.434825 | -1.482187 |
| 8                | 8                | 0              | 2.291581                | 0.757700  | -0.021907 |
| 9                | 7                | 0              | 0.136053                | -0.078628 | -0.404417 |
| 10               | 6                | 0              | 4.269511                | -0.454246 | 0.358159  |
| 11               | 1                | 0              | 4.066959                | -0.692894 | 1.409640  |
| 12               | 6                | 0              | 5.272379                | -1.453808 | -0.197516 |
| 13               | 1                | 0              | 5.443505                | -1.223284 | -1.259189 |
| 14               | 6                | 0              | 6.600376                | -1.366542 | 0.532914  |
| 15               | 1                | 0              | 6.429516                | -1.517942 | 1.605609  |
| 16               | 1                | 0              | 7.062825                | -0.389844 | 0.373008  |
| 17               | 8                | 0              | 4.881180                | 0.820838  | 0.240335  |
| 18               | 1                | 0              | 4.164630                | 1.462623  | 0.308521  |
| 19               | 8                | 0              | 4.748480                | -2.762638 | -0.055679 |
| 20               | 1                | 0              | 5.506566                | -3.350253 | -0.162856 |
| 21               | 8                | 0              | 7.401604                | -2.416431 | -0.003541 |
| 22               | 1                | 0              | 8.155461                | -2.550912 | 0.578066  |
| 23               | 8                | 0              | 1.740372                | -1.683299 | 1.316649  |
| 24               | 1                | 0              | 1.176820                | -0.920390 | 1.502582  |
| 25               | 6                | 0              | -1.202383               | 0.121568  | -0.974116 |
| 26               | 1                | 0              | -1.248123               | -0.281334 | -1.998397 |
| 27               | 1                | 0              | -1.403977               | 1.192406  | -1.047421 |
| 28               | 6                | 0              | 0.578626                | 2.341371  | -0.252080 |
| 29               | 6                | 0              | 0.223906                | 2.517819  | 1.086371  |
| 30               | 6                | 0              | 0.491581                | 3.412625  | -1.134864 |
| 31               | 6                | 0              | -0.217782               | 3.757321  | 1.532644  |
| 32               | 1                | 0              | 0.294962                | 1.679680  | 1.771261  |
| 33               | 6                | 0              | 0.047292                | 4.655963  | -0.688343 |
| 34               | 1                | 0              | 0.767358                | 3.272897  | -2.175205 |
| 35               | 6                | 0              | -0.307749               | 4.828760  | 0.644752  |
| 36               | 1                | 0              | -0.492594               | 3.891059  | 2.572759  |

|    |   |   |            |           |           |
|----|---|---|------------|-----------|-----------|
| 37 | 1 | 0 | -0.021043  | 5.485862  | -1.382300 |
| 38 | 6 | 0 | 1.077107   | 0.994923  | -0.717587 |
| 39 | 1 | 0 | 1.294455   | 1.024366  | -1.801405 |
| 40 | 6 | 0 | -2.283596  | -0.514591 | -0.107380 |
| 41 | 1 | 0 | -2.052598  | -1.570966 | 0.067828  |
| 42 | 1 | 0 | -2.273420  | -0.019865 | 0.870506  |
| 43 | 6 | 0 | -3.670252  | -0.394609 | -0.733872 |
| 44 | 1 | 0 | -3.876711  | 0.658832  | -0.960262 |
| 45 | 1 | 0 | -3.683766  | -0.928934 | -1.691490 |
| 46 | 6 | 0 | -4.776439  | -0.940817 | 0.165868  |
| 47 | 1 | 0 | -4.766370  | -0.397300 | 1.118511  |
| 48 | 1 | 0 | -4.564923  | -1.990747 | 0.403260  |
| 49 | 6 | 0 | -6.165944  | -0.834810 | -0.458084 |
| 50 | 1 | 0 | -6.372328  | 0.213983  | -0.705220 |
| 51 | 1 | 0 | -6.180692  | -1.387733 | -1.405355 |
| 52 | 6 | 0 | -7.271626  | -1.363796 | 0.452267  |
| 53 | 1 | 0 | -7.255692  | -0.810794 | 1.399706  |
| 54 | 1 | 0 | -7.066034  | -2.412596 | 0.700642  |
| 55 | 6 | 0 | -8.664722  | -1.258254 | -0.164243 |
| 56 | 1 | 0 | -8.870700  | -0.210731 | -0.411334 |
| 57 | 1 | 0 | -8.683852  | -1.812104 | -1.109431 |
| 58 | 6 | 0 | -9.754618  | -1.789408 | 0.761968  |
| 59 | 1 | 0 | -9.768727  | -1.234910 | 1.704870  |
| 60 | 1 | 0 | -10.745529 | -1.701801 | 0.309647  |
| 61 | 1 | 0 | -9.585733  | -2.844131 | 0.997540  |
| 62 | 1 | 0 | -0.654366  | 5.794653  | 0.994179  |

### Structure 38d (M06-2X, Gas Phase)

Energy (Hartrees): = -1251.9759227  
No imaginary frequencies

Standard orientation:

| Center<br>Number | Atomic<br>Number | Atomic<br>Type | Coordinates (Angstroms) |           |           |
|------------------|------------------|----------------|-------------------------|-----------|-----------|
|                  |                  |                | X                       | Y         | Z         |
| 1                | 6                | 0              | -1.916489               | -1.106299 | 1.326834  |
| 2                | 6                | 0              | -0.911194               | -0.116965 | 1.927532  |
| 3                | 6                | 0              | -2.487220               | -0.464300 | 0.062976  |
| 4                | 1                | 0              | -0.428222               | -0.560948 | 2.798846  |
| 5                | 1                | 0              | -1.446498               | 0.780934  | 2.257681  |
| 6                | 1                | 0              | -2.722201               | -1.315217 | 2.029531  |
| 7                | 1                | 0              | -2.982741               | 0.479132  | 0.325116  |
| 8                | 8                | 0              | -1.383443               | -0.195075 | -0.815944 |
| 9                | 7                | 0              | 0.124953                | 0.287815  | 0.971974  |
| 10               | 6                | 0              | -3.455314               | -1.327033 | -0.749508 |
| 11               | 1                | 0              | -3.093189               | -2.363738 | -0.749274 |
| 12               | 6                | 0              | -4.865853               | -1.296352 | -0.184000 |
| 13               | 1                | 0              | -5.226238               | -0.257599 | -0.210984 |
| 14               | 6                | 0              | -5.808318               | -2.148203 | -1.015083 |
| 15               | 1                | 0              | -5.407949               | -3.168345 | -1.068746 |
| 16               | 1                | 0              | -5.897481               | -1.733288 | -2.021830 |
| 17               | 8                | 0              | -3.558462               | -0.825997 | -2.070844 |
| 18               | 1                | 0              | -2.660194               | -0.617011 | -2.349004 |
| 19               | 8                | 0              | -4.832312               | -1.777629 | 1.143272  |
| 20               | 1                | 0              | -5.747924               | -1.971558 | 1.373900  |
| 21               | 8                | 0              | -7.049933               | -2.127951 | -0.318854 |
| 22               | 1                | 0              | -7.641640               | -2.766794 | -0.719270 |
| 23               | 8                | 0              | -1.294647               | -2.344294 | 1.026202  |
| 24               | 1                | 0              | -0.793665               | -2.214613 | 0.214247  |
| 25               | 6                | 0              | 1.236495                | -0.649299 | 0.780543  |
| 26               | 1                | 0              | 1.079569                | -1.290364 | -0.102168 |
| 27               | 1                | 0              | 1.278361                | -1.320002 | 1.641509  |
| 28               | 6                | 0              | -1.055404               | 2.138778  | -0.165139 |
| 29               | 6                | 0              | -0.519752               | 3.068631  | 0.723106  |
| 30               | 6                | 0              | -2.092717               | 2.523995  | -1.014622 |
| 31               | 6                | 0              | -1.017292               | 4.366887  | 0.764941  |
| 32               | 1                | 0              | 0.284515                | 2.758475  | 1.380052  |
| 33               | 6                | 0              | -2.590920               | 3.820611  | -0.969079 |
| 34               | 1                | 0              | -2.526053               | 1.797491  | -1.693631 |
| 35               | 6                | 0              | -2.053326               | 4.746327  | -0.080445 |
| 36               | 1                | 0              | -0.596036               | 5.082135  | 1.461772  |
| 37               | 1                | 0              | -3.403047               | 4.106882  | -1.626711 |
| 38               | 6                | 0              | -0.445992               | 0.745535  | -0.268455 |
| 39               | 1                | 0              | 0.351599                | 0.779792  | -1.015258 |
| 40               | 6                | 0              | 2.562355                | 0.089670  | 0.630423  |
| 41               | 1                | 0              | 2.474317                | 0.834753  | -0.169826 |
| 42               | 1                | 0              | 2.753760                | 0.648827  | 1.552020  |
| 43               | 6                | 0              | 3.727129                | -0.848621 | 0.327595  |
| 44               | 1                | 0              | 3.811558                | -1.597142 | 1.124912  |
| 45               | 1                | 0              | 3.516933                | -1.404436 | -0.594395 |
| 46               | 6                | 0              | 5.058682                | -0.116432 | 0.179317  |
| 47               | 1                | 0              | 5.277535                | 0.429985  | 1.104426  |
| 48               | 1                | 0              | 4.967876                | 0.639551  | -0.610124 |

|    |   |   |           |           |           |
|----|---|---|-----------|-----------|-----------|
| 49 | 6 | 0 | 6.223360  | -1.048024 | -0.146290 |
| 50 | 1 | 0 | 6.320974  | -1.799627 | 0.646490  |
| 51 | 1 | 0 | 5.998648  | -1.599872 | -1.067101 |
| 52 | 6 | 0 | 7.550911  | -0.312715 | -0.311351 |
| 53 | 1 | 0 | 7.779571  | 0.236927  | 0.609892  |
| 54 | 1 | 0 | 7.450972  | 0.441495  | -1.101631 |
| 55 | 6 | 0 | 8.716159  | -1.240883 | -0.646460 |
| 56 | 1 | 0 | 8.819994  | -1.989596 | 0.146401  |
| 57 | 1 | 0 | 8.482678  | -1.793371 | -1.563012 |
| 58 | 6 | 0 | 10.033425 | -0.489271 | -0.819872 |
| 59 | 1 | 0 | 10.295413 | 0.051456  | 0.093242  |
| 60 | 1 | 0 | 10.855938 | -1.167043 | -1.055798 |
| 61 | 1 | 0 | 9.959198  | 0.242694  | -1.628350 |
| 62 | 1 | 0 | -2.442988 | 5.756675  | -0.045173 |

### Structure 38d (M06-2X, Benzene)

Energy (Hartrees): = - 1252.0026257  
 No imaginary frequencies

Standard orientation:

| Center<br>Number | Atomic<br>Number | Atomic<br>Type | Coordinates (Angstroms) |           |           |
|------------------|------------------|----------------|-------------------------|-----------|-----------|
|                  |                  |                | X                       | Y         | Z         |
| 1                | 6                | 0              | -1.911387               | -1.097753 | 1.314274  |
| 2                | 6                | 0              | -0.895625               | -0.116295 | 1.909410  |
| 3                | 6                | 0              | -2.497907               | -0.447247 | 0.062136  |
| 4                | 1                | 0              | -0.401352               | -0.568065 | 2.770465  |
| 5                | 1                | 0              | -1.428447               | 0.776740  | 2.256175  |
| 6                | 1                | 0              | -2.706925               | -1.306250 | 2.028440  |
| 7                | 1                | 0              | -2.996312               | 0.490415  | 0.339485  |
| 8                | 8                | 0              | -1.406498               | -0.164540 | -0.827980 |
| 9                | 7                | 0              | 0.127628                | 0.297181  | 0.944020  |
| 10               | 6                | 0              | -3.470140               | -1.304859 | -0.750691 |
| 11               | 1                | 0              | -3.084451               | -2.331491 | -0.800720 |
| 12               | 6                | 0              | -4.865963               | -1.334768 | -0.148357 |
| 13               | 1                | 0              | -5.244933               | -0.303726 | -0.090606 |
| 14               | 6                | 0              | -5.818077               | -2.146149 | -1.009295 |
| 15               | 1                | 0              | -5.400484               | -3.150196 | -1.154524 |
| 16               | 1                | 0              | -5.956124               | -1.664068 | -1.979968 |
| 17               | 8                | 0              | -3.617680               | -0.758719 | -2.051446 |
| 18               | 1                | 0              | -2.729073               | -0.529009 | -2.345505 |
| 19               | 8                | 0              | -4.790053               | -1.908362 | 1.141625  |
| 20               | 1                | 0              | -5.695509               | -2.149144 | 1.370829  |
| 21               | 8                | 0              | -7.036753               | -2.207417 | -0.274406 |
| 22               | 1                | 0              | -7.610056               | -2.860266 | -0.682181 |
| 23               | 8                | 0              | -1.301175               | -2.339664 | 0.999189  |
| 24               | 1                | 0              | -0.794434               | -2.203869 | 0.191189  |
| 25               | 6                | 0              | 1.238035                | -0.638900 | 0.731276  |
| 26               | 1                | 0              | 1.073317                | -1.267774 | -0.158446 |
| 27               | 1                | 0              | 1.286574                | -1.318028 | 1.585239  |
| 28               | 6                | 0              | -1.061508               | 2.163664  | -0.162353 |
| 29               | 6                | 0              | -0.516965               | 3.086829  | 0.728409  |
| 30               | 6                | 0              | -2.106056               | 2.559015  | -0.998869 |
| 31               | 6                | 0              | -1.011583               | 4.386148  | 0.784525  |
| 32               | 1                | 0              | 0.293020                | 2.773796  | 1.377128  |
| 33               | 6                | 0              | -2.601471               | 3.856510  | -0.939873 |
| 34               | 1                | 0              | -2.547749               | 1.839912  | -1.680148 |
| 35               | 6                | 0              | -2.054377               | 4.774829  | -0.048946 |
| 36               | 1                | 0              | -0.582630               | 5.095079  | 1.483529  |
| 37               | 1                | 0              | -3.418995               | 4.149013  | -1.588491 |
| 38               | 6                | 0              | -0.457919               | 0.768256  | -0.284088 |
| 39               | 1                | 0              | 0.329509                | 0.807035  | -1.041099 |
| 40               | 6                | 0              | 2.564855                | 0.098846  | 0.582780  |
| 41               | 1                | 0              | 2.478775                | 0.846475  | -0.215402 |
| 42               | 1                | 0              | 2.757218                | 0.652608  | 1.507872  |
| 43               | 6                | 0              | 3.727414                | -0.842627 | 0.279070  |
| 44               | 1                | 0              | 3.801198                | -1.598511 | 1.070682  |
| 45               | 1                | 0              | 3.521010                | -1.388065 | -0.650077 |
| 46               | 6                | 0              | 5.065159                | -0.117175 | 0.149698  |
| 47               | 1                | 0              | 5.275333                | 0.423331  | 1.080482  |
| 48               | 1                | 0              | 4.988618                | 0.642380  | -0.637986 |
| 49               | 6                | 0              | 6.229005                | -1.054655 | -0.164150 |
| 50               | 1                | 0              | 6.307856                | -1.812521 | 0.624979  |
| 51               | 1                | 0              | 6.016256                | -1.597417 | -1.093361 |
| 52               | 6                | 0              | 7.565460                | -0.328490 | -0.300067 |
| 53               | 1                | 0              | 7.781169                | 0.213081  | 0.629239  |
| 54               | 1                | 0              | 7.486085                | 0.431042  | -1.087790 |
| 55               | 6                | 0              | 8.730233                | -1.263471 | -0.619182 |
| 56               | 1                | 0              | 8.813075                | -2.019555 | 0.169531  |
| 57               | 1                | 0              | 8.512462                | -1.805673 | -1.545934 |
| 58               | 6                | 0              | 10.056667               | -0.522342 | -0.758142 |
| 59               | 1                | 0              | 10.310012               | 0.002989  | 0.167006  |
| 60               | 1                | 0              | 10.877544               | -1.204997 | -0.988944 |
| 61               | 1                | 0              | 10.006731               | 0.221919  | -1.557923 |

62 1 0 -2.441512 5.785964 -0.002545

### Structure 38d (M06-2X, DMSO)

Energy (Hartrees): = - 1252.0024187  
No imaginary frequencies

Standard orientation:

| Center<br>Number | Atomic<br>Number | Atomic<br>Type | Coordinates (Angstroms) |           |           |
|------------------|------------------|----------------|-------------------------|-----------|-----------|
|                  |                  |                | X                       | Y         | Z         |
| 1                | 6                | 0              | -1.922444               | -1.072903 | 1.331131  |
| 2                | 6                | 0              | -0.913836               | -0.087341 | 1.929039  |
| 3                | 6                | 0              | -2.491619               | -0.436382 | 0.065020  |
| 4                | 1                | 0              | -0.430793               | -0.529776 | 2.801344  |
| 5                | 1                | 0              | -1.456298               | 0.806073  | 2.259857  |
| 6                | 1                | 0              | -2.726546               | -1.265723 | 2.040054  |
| 7                | 1                | 0              | -2.999331               | 0.499527  | 0.331244  |
| 8                | 8                | 0              | -1.390885               | -0.154037 | -0.812894 |
| 9                | 7                | 0              | 0.122322                | 0.321020  | 0.974834  |
| 10               | 6                | 0              | -3.448997               | -1.300759 | -0.757051 |
| 11               | 1                | 0              | -3.043872               | -2.318246 | -0.829430 |
| 12               | 6                | 0              | -4.843261               | -1.369992 | -0.153614 |
| 13               | 1                | 0              | -5.231101               | -0.346336 | -0.046713 |
| 14               | 6                | 0              | -5.792005               | -2.153271 | -1.043366 |
| 15               | 1                | 0              | -5.370763               | -3.148949 | -1.227958 |
| 16               | 1                | 0              | -5.938138               | -1.638277 | -1.995474 |
| 17               | 8                | 0              | -3.606456               | -0.733699 | -2.049400 |
| 18               | 1                | 0              | -2.720810               | -0.482412 | -2.337303 |
| 19               | 8                | 0              | -4.762287               | -2.000909 | 1.111863  |
| 20               | 1                | 0              | -5.666421               | -2.267506 | 1.319932  |
| 21               | 8                | 0              | -7.010875               | -2.248714 | -0.310650 |
| 22               | 1                | 0              | -7.560282               | -2.922988 | -0.720931 |
| 23               | 8                | 0              | -1.315320               | -2.324815 | 1.043341  |
| 24               | 1                | 0              | -0.783539               | -2.202751 | 0.248199  |
| 25               | 6                | 0              | 1.230238                | -0.623999 | 0.777849  |
| 26               | 1                | 0              | 1.058917                | -1.276032 | -0.093041 |
| 27               | 1                | 0              | 1.285900                | -1.274891 | 1.653164  |
| 28               | 6                | 0              | -1.054341               | 2.178697  | -0.157248 |
| 29               | 6                | 0              | -0.521985               | 3.108039  | 0.735700  |
| 30               | 6                | 0              | -2.088369               | 2.571275  | -1.008911 |
| 31               | 6                | 0              | -1.018390               | 4.408051  | 0.780808  |
| 32               | 1                | 0              | 0.281198                | 2.804200  | 1.397131  |
| 33               | 6                | 0              | -2.586395               | 3.869279  | -0.961998 |
| 34               | 1                | 0              | -2.519356               | 1.851967  | -1.696761 |
| 35               | 6                | 0              | -2.051946               | 4.792669  | -0.067259 |
| 36               | 1                | 0              | -0.597940               | 5.120090  | 1.482216  |
| 37               | 1                | 0              | -3.395144               | 4.158616  | -1.623386 |
| 38               | 6                | 0              | -0.448796               | 0.782450  | -0.264667 |
| 39               | 1                | 0              | 0.347703                | 0.818502  | -1.011960 |
| 40               | 6                | 0              | 2.555715                | 0.108138  | 0.599038  |
| 41               | 1                | 0              | 2.461538                | 0.838520  | -0.213890 |
| 42               | 1                | 0              | 2.764938                | 0.676658  | 1.511998  |
| 43               | 6                | 0              | 3.711129                | -0.842320 | 0.298050  |
| 44               | 1                | 0              | 3.786136                | -1.589381 | 1.098000  |
| 45               | 1                | 0              | 3.495052                | -1.394694 | -0.624612 |
| 46               | 6                | 0              | 5.049962                | -0.122733 | 0.153270  |
| 47               | 1                | 0              | 5.271026                | 0.420093  | 1.080381  |
| 48               | 1                | 0              | 4.968901                | 0.632999  | -0.637846 |
| 49               | 6                | 0              | 6.207169                | -1.065504 | -0.167509 |
| 50               | 1                | 0              | 6.288286                | -1.822405 | 0.622546  |
| 51               | 1                | 0              | 5.985763                | -1.607100 | -1.095469 |
| 52               | 6                | 0              | 7.544911                | -0.344233 | -0.312716 |
| 53               | 1                | 0              | 7.770218                | 0.194007  | 0.616391  |
| 54               | 1                | 0              | 7.462221                | 0.416207  | -1.099414 |
| 55               | 6                | 0              | 8.702891                | -1.283150 | -0.642821 |
| 56               | 1                | 0              | 8.789070                | -2.040575 | 0.144445  |
| 57               | 1                | 0              | 8.475230                | -1.822259 | -1.569141 |
| 58               | 6                | 0              | 10.030758               | -0.546593 | -0.791090 |
| 59               | 1                | 0              | 10.292924               | -0.024009 | 0.133469  |
| 60               | 1                | 0              | 10.847480               | -1.232294 | -1.029238 |
| 61               | 1                | 0              | 9.976482                | 0.199062  | -1.589677 |
| 62               | 1                | 0              | -2.440646               | 5.803836  | -0.029971 |

### Structure 39a (M06-2X, Gas Phase)

Energy (Hartrees): = - 1366.4837692  
No imaginary frequencies

Standard orientation:

| Center<br>Number | Atomic<br>Number | Atomic<br>Type | Coordinates (Angstroms) |   |   |
|------------------|------------------|----------------|-------------------------|---|---|
|                  |                  |                | X                       | Y | Z |

|    |   |   |           |           |           |
|----|---|---|-----------|-----------|-----------|
| 1  | 6 | 0 | -0.398047 | 1.567326  | 0.443819  |
| 2  | 6 | 0 | -1.324695 | 2.488322  | -0.017563 |
| 3  | 6 | 0 | -1.053359 | 3.858538  | 0.040253  |
| 4  | 6 | 0 | 0.152035  | 4.309278  | 0.574671  |
| 5  | 6 | 0 | 1.070354  | 3.377090  | 1.055292  |
| 6  | 6 | 0 | 0.805240  | 2.018811  | 0.996802  |
| 7  | 1 | 0 | -2.287756 | 2.171882  | -0.399354 |
| 8  | 1 | 0 | 2.000286  | 3.727935  | 1.486964  |
| 9  | 1 | 0 | 1.524217  | 1.309311  | 1.391087  |
| 10 | 6 | 0 | -0.668652 | 0.074217  | 0.326424  |
| 11 | 1 | 0 | -0.240705 | -0.441625 | 1.190477  |
| 12 | 7 | 0 | -0.164515 | -0.548799 | -0.913255 |
| 13 | 8 | 0 | -2.052858 | -0.187438 | 0.281174  |
| 14 | 6 | 0 | -2.456409 | -0.505411 | -1.064147 |
| 15 | 6 | 0 | -1.202422 | -0.237622 | -1.896383 |
| 16 | 1 | 0 | -1.121288 | -0.911198 | -2.750658 |
| 17 | 1 | 0 | -1.155704 | 0.804167  | -2.242053 |
| 18 | 1 | 0 | -3.293396 | 0.139926  | -1.323468 |
| 19 | 6 | 0 | -2.902529 | -1.967530 | -1.141405 |
| 20 | 1 | 0 | -3.479445 | -2.103267 | -2.065225 |
| 21 | 6 | 0 | -3.764934 | -2.427379 | 0.038225  |
| 22 | 1 | 0 | -3.208749 | -2.236949 | 0.963861  |
| 23 | 6 | 0 | -5.128102 | -1.744981 | 0.131822  |
| 24 | 1 | 0 | -5.689120 | -1.966395 | -0.780962 |
| 25 | 6 | 0 | -5.905723 | -2.266034 | 1.329646  |
| 26 | 1 | 0 | -6.908822 | -1.825917 | 1.313563  |
| 27 | 1 | 0 | -5.969352 | -3.356364 | 1.280429  |
| 28 | 8 | 0 | -1.795867 | -2.862200 | -1.220944 |
| 29 | 1 | 0 | -1.014495 | -2.399118 | -0.877874 |
| 30 | 8 | 0 | -4.020903 | -3.812352 | -0.112723 |
| 31 | 1 | 0 | -3.175388 | -4.202613 | -0.362186 |
| 32 | 8 | 0 | -5.008763 | -0.338275 | 0.215697  |
| 33 | 1 | 0 | -4.565809 | -0.153819 | 1.053330  |
| 34 | 8 | 0 | -5.185989 | -1.833422 | 2.478196  |
| 35 | 1 | 0 | -5.665306 | -2.100402 | 3.263486  |
| 36 | 6 | 0 | 1.195798  | -0.232382 | -1.329433 |
| 37 | 1 | 0 | 1.311722  | -0.608152 | -2.350235 |
| 38 | 1 | 0 | 1.361854  | 0.854940  | -1.367502 |
| 39 | 6 | 0 | 2.240039  | -0.900695 | -0.440485 |
| 40 | 1 | 0 | 2.034168  | -0.686442 | 0.613151  |
| 41 | 1 | 0 | 2.155898  | -1.986123 | -0.554723 |
| 42 | 6 | 0 | 3.655680  | -0.440574 | -0.777108 |
| 43 | 1 | 0 | 3.853598  | -0.617460 | -1.841305 |
| 44 | 1 | 0 | 3.727226  | 0.643566  | -0.626253 |
| 45 | 6 | 0 | 4.724768  | -1.140619 | 0.058278  |
| 46 | 1 | 0 | 4.525754  | -0.965194 | 1.122519  |
| 47 | 1 | 0 | 4.651570  | -2.223935 | -0.093716 |
| 48 | 6 | 0 | 6.141754  | -0.678612 | -0.273095 |
| 49 | 1 | 0 | 6.340447  | -0.855095 | -1.337052 |
| 50 | 1 | 0 | 6.214726  | 0.405165  | -0.122035 |
| 51 | 6 | 0 | 7.211188  | -1.377971 | 0.562402  |
| 52 | 1 | 0 | 7.137627  | -2.461960 | 0.412649  |
| 53 | 1 | 0 | 7.014204  | -1.200968 | 1.626774  |
| 54 | 6 | 0 | 8.629539  | -0.919364 | 0.230165  |
| 55 | 1 | 0 | 8.824782  | -1.097442 | -0.832746 |
| 56 | 1 | 0 | 8.701444  | 0.163282  | 0.379807  |
| 57 | 6 | 0 | 9.687397  | -1.626964 | 1.073348  |
| 58 | 1 | 0 | 10.694315 | -1.287928 | 0.823073  |
| 59 | 1 | 0 | 9.525062  | -1.439528 | 2.137893  |
| 60 | 1 | 0 | 9.648961  | -2.708150 | 0.917622  |
| 61 | 1 | 0 | 0.380124  | 5.364378  | 0.635537  |
| 62 | 8 | 0 | -2.028927 | 4.668383  | -0.441127 |
| 63 | 6 | 0 | -1.813493 | 6.062388  | -0.382645 |
| 64 | 1 | 0 | -0.938698 | 6.353911  | -0.972716 |
| 65 | 1 | 0 | -2.703540 | 6.522107  | -0.805315 |
| 66 | 1 | 0 | -1.684916 | 6.400511  | 0.650473  |

### Structure 39a (M06-2X, Benzene)

Energy (Hartrees): = - 1366.5114647  
 No imaginary frequencies

Standard orientation:

| Center Number | Atomic Number | Atomic Type | Coordinates (Angstroms) |          |           |
|---------------|---------------|-------------|-------------------------|----------|-----------|
|               |               |             | X                       | Y        | Z         |
| 1             | 6             | 0           | -0.449404               | 1.623338 | 0.452943  |
| 2             | 6             | 0           | -1.408693               | 2.509393 | -0.013243 |
| 3             | 6             | 0           | -1.191565               | 3.889474 | 0.049179  |
| 4             | 6             | 0           | -0.005610               | 4.384641 | 0.589034  |
| 5             | 6             | 0           | 0.946214                | 3.487456 | 1.071684  |
| 6             | 6             | 0           | 0.733360                | 2.119486 | 1.011871  |
| 7             | 1             | 0           | -2.355677               | 2.154226 | -0.402763 |
| 8             | 1             | 0           | 1.861228                | 3.874188 | 1.505522  |

|    |   |   |           |           |           |
|----|---|---|-----------|-----------|-----------|
| 9  | 1 | 0 | 1.475548  | 1.435811  | 1.408976  |
| 10 | 6 | 0 | -0.661135 | 0.120253  | 0.338553  |
| 11 | 1 | 0 | -0.218374 | -0.374301 | 1.207694  |
| 12 | 7 | 0 | -0.127908 | -0.490942 | -0.893185 |
| 13 | 8 | 0 | -2.037051 | -0.192651 | 0.285474  |
| 14 | 6 | 0 | -2.415710 | -0.543833 | -1.058851 |
| 15 | 6 | 0 | -1.169664 | -0.229122 | -1.885782 |
| 16 | 1 | 0 | -1.054178 | -0.902477 | -2.736516 |
| 17 | 1 | 0 | -1.166564 | 0.810812  | -2.239141 |
| 18 | 1 | 0 | -3.277102 | 0.059593  | -1.336811 |
| 19 | 6 | 0 | -2.794546 | -2.024917 | -1.119796 |
| 20 | 1 | 0 | -3.331861 | -2.203112 | -2.060546 |
| 21 | 6 | 0 | -3.675459 | -2.502768 | 0.039708  |
| 22 | 1 | 0 | -3.166052 | -2.259254 | 0.979759  |
| 23 | 6 | 0 | -5.078382 | -1.900392 | 0.067154  |
| 24 | 1 | 0 | -5.588807 | -2.157202 | -0.866227 |
| 25 | 6 | 0 | -5.880963 | -2.448507 | 1.234966  |
| 26 | 1 | 0 | -6.901557 | -2.054194 | 1.173822  |
| 27 | 1 | 0 | -5.901783 | -3.541112 | 1.194504  |
| 28 | 8 | 0 | -1.644220 | -2.868945 | -1.136499 |
| 29 | 1 | 0 | -0.885862 | -2.342128 | -0.831353 |
| 30 | 8 | 0 | -3.841854 | -3.906378 | -0.082570 |
| 31 | 1 | 0 | -2.963262 | -4.246586 | -0.288232 |
| 32 | 8 | 0 | -5.038452 | -0.486426 | 0.142186  |
| 33 | 1 | 0 | -4.651958 | -0.273670 | 1.000847  |
| 34 | 8 | 0 | -5.232573 | -1.981259 | 2.412707  |
| 35 | 1 | 0 | -5.756520 | -2.238601 | 3.174225  |
| 36 | 6 | 0 | 1.228309  | -0.144649 | -1.302227 |
| 37 | 1 | 0 | 1.358949  | -0.526186 | -2.319056 |
| 38 | 1 | 0 | 1.369471  | 0.945763  | -1.347687 |
| 39 | 6 | 0 | 2.278200  | -0.785254 | -0.400530 |
| 40 | 1 | 0 | 2.083585  | -0.531106 | 0.646478  |
| 41 | 1 | 0 | 2.185106  | -1.873802 | -0.477210 |
| 42 | 6 | 0 | 3.695571  | -0.353319 | -0.767406 |
| 43 | 1 | 0 | 3.879915  | -0.570378 | -1.826680 |
| 44 | 1 | 0 | 3.785264  | 0.734116  | -0.653652 |
| 45 | 6 | 0 | 4.761941  | -1.042293 | 0.081109  |
| 46 | 1 | 0 | 4.579666  | -0.822641 | 1.140223  |
| 47 | 1 | 0 | 4.664151  | -2.128963 | -0.030094 |
| 48 | 6 | 0 | 6.185110  | -0.625641 | -0.283270 |
| 49 | 1 | 0 | 6.364695  | -0.840833 | -1.343649 |
| 50 | 1 | 0 | 6.287427  | 0.460218  | -0.166099 |
| 51 | 6 | 0 | 7.247461  | -1.327633 | 0.559480  |
| 52 | 1 | 0 | 7.142093  | -2.413436 | 0.443382  |
| 53 | 1 | 0 | 7.069998  | -1.112285 | 1.620367  |
| 54 | 6 | 0 | 8.673987  | -0.920808 | 0.195725  |
| 55 | 1 | 0 | 8.848205  | -1.130183 | -0.865408 |
| 56 | 1 | 0 | 8.782709  | 0.162321  | 0.320134  |
| 57 | 6 | 0 | 9.722218  | -1.641325 | 1.038564  |
| 58 | 1 | 0 | 10.735566 | -1.336041 | 0.768201  |
| 59 | 1 | 0 | 9.582041  | -1.429210 | 2.102146  |
| 60 | 1 | 0 | 9.654006  | -2.724646 | 0.905016  |
| 61 | 1 | 0 | 0.182261  | 5.447811  | 0.650451  |
| 62 | 8 | 0 | -2.194019 | 4.663070  | -0.432800 |
| 63 | 6 | 0 | -2.041717 | 6.067247  | -0.348536 |
| 64 | 1 | 0 | -1.183508 | 6.411531  | -0.934558 |
| 65 | 1 | 0 | -2.952522 | 6.493760  | -0.764176 |
| 66 | 1 | 0 | -1.932733 | 6.394539  | 0.690452  |

### Structure 39a (M06-2X, DMSO)

Energy (Hartrees): = -1366.5129216

No imaginary frequencies

Standard orientation:

| Center Number | Atomic Number | Atomic Type | Coordinates (Angstroms) |           |           |
|---------------|---------------|-------------|-------------------------|-----------|-----------|
|               |               |             | X                       | Y         | Z         |
| 1             | 6             | 0           | -0.372458               | 1.621771  | 0.505856  |
| 2             | 6             | 0           | -1.276186               | 2.538881  | -0.012906 |
| 3             | 6             | 0           | -1.012006               | 3.911467  | 0.049436  |
| 4             | 6             | 0           | 0.164774                | 4.368245  | 0.643872  |
| 5             | 6             | 0           | 1.060232                | 3.440161  | 1.175155  |
| 6             | 6             | 0           | 0.801511                | 2.078573  | 1.114244  |
| 7             | 1             | 0           | -2.209874               | 2.213846  | -0.457707 |
| 8             | 1             | 0           | 1.968377                | 3.797491  | 1.647511  |
| 9             | 1             | 0           | 1.500821                | 1.369494  | 1.543944  |
| 10            | 6             | 0           | -0.630015               | 0.126323  | 0.393872  |
| 11            | 1             | 0           | -0.188982               | -0.379169 | 1.256970  |
| 12            | 7             | 0           | -0.128040               | -0.497242 | -0.844624 |
| 13            | 8             | 0           | -2.017672               | -0.146085 | 0.358184  |
| 14            | 6             | 0           | -2.418718               | -0.501523 | -0.978879 |
| 15            | 6             | 0           | -1.178259               | -0.215220 | -1.824274 |
| 16            | 1             | 0           | -1.087502               | -0.889279 | -2.677756 |
| 17            | 1             | 0           | -1.157725               | 0.822538  | -2.181570 |



|    |   |   |           |           |           |
|----|---|---|-----------|-----------|-----------|
| 18 | 1 | 0 | -3.274341 | 0.110443  | -1.255142 |
| 19 | 6 | 0 | -2.813200 | -1.977473 | -1.023231 |
| 20 | 1 | 0 | -3.283343 | -2.171124 | -1.997184 |
| 21 | 6 | 0 | -3.784938 | -2.408982 | 0.081256  |
| 22 | 1 | 0 | -3.378414 | -2.080286 | 1.045574  |
| 23 | 6 | 0 | -5.201512 | -1.859095 | -0.077172 |
| 24 | 1 | 0 | -5.585096 | -2.155536 | -1.057979 |
| 25 | 6 | 0 | -6.129267 | -2.397016 | 0.998323  |
| 26 | 1 | 0 | -7.144061 | -2.038089 | 0.797246  |
| 27 | 1 | 0 | -6.121176 | -3.489971 | 0.995137  |
| 28 | 8 | 0 | -1.671869 | -2.828771 | -0.914822 |
| 29 | 1 | 0 | -0.897788 | -2.266288 | -0.726163 |
| 30 | 8 | 0 | -3.891327 | -3.825216 | 0.048446  |
| 31 | 1 | 0 | -2.987143 | -4.137170 | -0.079519 |
| 32 | 8 | 0 | -5.211251 | -0.440665 | -0.033213 |
| 33 | 1 | 0 | -5.038940 | -0.209837 | 0.888610  |
| 34 | 8 | 0 | -5.649304 | -1.876137 | 2.235121  |
| 35 | 1 | 0 | -6.314660 | -2.039064 | 2.909817  |
| 36 | 6 | 0 | 1.229484  | -0.173081 | -1.270551 |
| 37 | 1 | 0 | 1.340504  | -0.552111 | -2.290391 |
| 38 | 1 | 0 | 1.385397  | 0.915356  | -1.313573 |
| 39 | 6 | 0 | 2.278993  | -0.830756 | -0.381569 |
| 40 | 1 | 0 | 2.090044  | -0.589615 | 0.669545  |
| 41 | 1 | 0 | 2.182990  | -1.918084 | -0.476869 |
| 42 | 6 | 0 | 3.695431  | -0.398437 | -0.750640 |
| 43 | 1 | 0 | 3.864211  | -0.577984 | -1.819589 |
| 44 | 1 | 0 | 3.795823  | 0.682840  | -0.594679 |
| 45 | 6 | 0 | 4.764160  | -1.128987 | 0.058668  |
| 46 | 1 | 0 | 4.588616  | -0.956636 | 1.127705  |
| 47 | 1 | 0 | 4.662057  | -2.208868 | -0.104173 |
| 48 | 6 | 0 | 6.186511  | -0.700273 | -0.294121 |
| 49 | 1 | 0 | 6.357782  | -0.862729 | -1.365420 |
| 50 | 1 | 0 | 6.294820  | 0.377336  | -0.120073 |
| 51 | 6 | 0 | 7.249918  | -1.450259 | 0.504521  |
| 52 | 1 | 0 | 7.137969  | -2.527937 | 0.331895  |
| 53 | 1 | 0 | 7.080213  | -1.287412 | 1.576163  |
| 54 | 6 | 0 | 8.676546  | -1.033146 | 0.153806  |
| 55 | 1 | 0 | 8.845314  | -1.194352 | -0.916761 |
| 56 | 1 | 0 | 8.791363  | 0.042189  | 0.329969  |
| 57 | 6 | 0 | 9.723362  | -1.798430 | 0.958050  |
| 58 | 1 | 0 | 10.738301 | -1.493110 | 0.692213  |
| 59 | 1 | 0 | 9.592601  | -1.627143 | 2.030471  |
| 60 | 1 | 0 | 9.641301  | -2.874653 | 0.780129  |
| 61 | 1 | 0 | 0.387575  | 5.424856  | 0.708194  |
| 62 | 8 | 0 | -1.959614 | 4.717710  | -0.485577 |
| 63 | 6 | 0 | -1.741160 | 6.119718  | -0.423212 |
| 64 | 1 | 0 | -0.837010 | 6.405190  | -0.968889 |
| 65 | 1 | 0 | -2.606068 | 6.580448  | -0.896241 |
| 66 | 1 | 0 | -1.668618 | 6.463661  | 0.612811  |

### Structure 39b (M06-2X, Gas Phase)

Energy (Hartrees): = - 1366.4874576

No imaginary frequencies

Standard orientation:

| Center<br>Number | Atomic<br>Number | Atomic<br>Type | Coordinates (Angstroms) |           |           |
|------------------|------------------|----------------|-------------------------|-----------|-----------|
|                  |                  |                | X                       | Y         | Z         |
| 1                | 6                | 0              | -1.211008               | 1.750550  | -0.080892 |
| 2                | 6                | 0              | -1.661819               | 1.512668  | 1.211183  |
| 3                | 6                | 0              | -1.757045               | 2.576067  | 2.103742  |
| 4                | 6                | 0              | -1.406929               | 3.859531  | 1.715981  |
| 5                | 6                | 0              | -0.957081               | 4.097250  | 0.416688  |
| 6                | 6                | 0              | -0.861922               | 3.037939  | -0.486325 |
| 7                | 1                | 0              | -1.936930               | 0.508051  | 1.509420  |
| 8                | 1                | 0              | -2.111292               | 2.403443  | 3.113013  |
| 9                | 1                | 0              | -0.524700               | 3.195427  | -1.503442 |
| 10               | 6                | 0              | -1.070354               | 0.603313  | -1.049588 |
| 11               | 1                | 0              | -0.873309               | 0.997205  | -2.065086 |
| 12               | 7                | 0              | -0.009183               | -0.330286 | -0.662884 |
| 13               | 8                | 0              | -2.236311               | -0.190053 | -1.077881 |
| 14               | 6                | 0              | -1.870971               | -1.574598 | -1.186803 |
| 15               | 6                | 0              | -0.359073               | -1.535320 | -1.414946 |
| 16               | 1                | 0              | 0.143861                | -2.415046 | -1.011330 |
| 17               | 1                | 0              | -0.116258               | -1.429477 | -2.484315 |
| 18               | 1                | 0              | -2.416265               | -2.008993 | -2.021516 |
| 19               | 6                | 0              | -2.243841               | -2.312397 | 0.099964  |
| 20               | 1                | 0              | -2.175968               | -3.392016 | -0.094040 |
| 21               | 6                | 0              | -3.653068               | -2.007634 | 0.618643  |
| 22               | 1                | 0              | -3.755440               | -0.920592 | 0.729332  |
| 23               | 6                | 0              | -4.778208               | -2.517007 | -0.279564 |
| 24               | 1                | 0              | -4.671217               | -3.600160 | -0.393625 |
| 25               | 6                | 0              | -6.134869               | -2.214444 | 0.335242  |
| 26               | 1                | 0              | -6.911812               | -2.676898 | -0.283940 |

|    |   |   |           |           |           |
|----|---|---|-----------|-----------|-----------|
| 27 | 1 | 0 | -6.175314 | -2.611321 | 1.352856  |
| 28 | 8 | 0 | -1.347364 | -2.019883 | 1.170723  |
| 29 | 1 | 0 | -0.756726 | -1.298217 | 0.896741  |
| 30 | 8 | 0 | -3.814375 | -2.654887 | 1.868671  |
| 31 | 1 | 0 | -2.999518 | -2.485836 | 2.354882  |
| 32 | 8 | 0 | -4.707528 | -1.951742 | -1.574512 |
| 33 | 1 | 0 | -4.914933 | -1.014985 | -1.469476 |
| 34 | 8 | 0 | -6.257255 | -0.797060 | 0.317168  |
| 35 | 1 | 0 | -7.102412 | -0.551345 | 0.695229  |
| 36 | 6 | 0 | 1.331651  | 0.187866  | -0.897236 |
| 37 | 1 | 0 | 1.479477  | 0.397832  | -1.972385 |
| 38 | 1 | 0 | 1.413058  | 1.140167  | -0.363948 |
| 39 | 6 | 0 | 2.415854  | -0.761450 | -0.403982 |
| 40 | 1 | 0 | 2.201255  | -1.027556 | 0.636593  |
| 41 | 1 | 0 | 2.392495  | -1.690833 | -0.983326 |
| 42 | 6 | 0 | 3.807493  | -0.142045 | -0.508881 |
| 43 | 1 | 0 | 3.838187  | 0.781092  | 0.081782  |
| 44 | 1 | 0 | 4.001868  | 0.148242  | -1.548701 |
| 45 | 6 | 0 | 4.913835  | -1.080661 | -0.033644 |
| 46 | 1 | 0 | 4.890374  | -2.001569 | -0.628531 |
| 47 | 1 | 0 | 4.714849  | -1.377556 | 1.003031  |
| 48 | 6 | 0 | 6.304438  | -0.456951 | -0.122872 |
| 49 | 1 | 0 | 6.325492  | 0.465754  | 0.469503  |
| 50 | 1 | 0 | 6.504093  | -0.161982 | -1.160364 |
| 51 | 6 | 0 | 7.412826  | -1.390003 | 0.358047  |
| 52 | 1 | 0 | 7.213591  | -1.685348 | 1.395502  |
| 53 | 1 | 0 | 7.393613  | -2.313376 | -0.233676 |
| 54 | 6 | 0 | 8.803708  | -0.765646 | 0.270672  |
| 55 | 1 | 0 | 9.001784  | -0.473022 | -0.766259 |
| 56 | 1 | 0 | 8.820586  | 0.157114  | 0.860557  |
| 57 | 6 | 0 | 9.901460  | -1.708232 | 0.757443  |
| 58 | 1 | 0 | 9.914335  | -2.627383 | 0.165880  |
| 59 | 1 | 0 | 10.888692 | -1.248286 | 0.683204  |
| 60 | 1 | 0 | 9.738599  | -1.988033 | 1.801463  |
| 61 | 1 | 0 | -1.475237 | 4.699977  | 2.395340  |
| 62 | 8 | 0 | -0.640237 | 5.384505  | 0.123242  |
| 63 | 6 | 0 | -0.196753 | 5.668725  | -1.186030 |
| 64 | 1 | 0 | -0.964055 | 5.422704  | -1.927432 |
| 65 | 1 | 0 | 0.000002  | 6.737929  | -1.211867 |
| 66 | 1 | 0 | 0.724075  | 5.124713  | -1.421223 |

### Structure 39b (M06-2X, Benzene)

Energy (Hartrees): = - 1366.5152619  
No imaginary frequencies

Standard orientation:

| Center Number | Atomic Number | Atomic Type | Coordinates (Angstroms) |           |           |
|---------------|---------------|-------------|-------------------------|-----------|-----------|
|               |               |             | X                       | Y         | Z         |
| 1             | 6             | 0           | -1.194123               | 1.763312  | -0.077488 |
| 2             | 6             | 0           | -1.624919               | 1.521693  | 1.221548  |
| 3             | 6             | 0           | -1.710339               | 2.582788  | 2.117996  |
| 4             | 6             | 0           | -1.370541               | 3.868664  | 1.727314  |
| 5             | 6             | 0           | -0.941991               | 4.110971  | 0.421032  |
| 6             | 6             | 0           | -0.855925               | 3.052962  | -0.485544 |
| 7             | 1             | 0           | -1.893628               | 0.516132  | 1.522946  |
| 8             | 1             | 0           | -2.048062               | 2.406956  | 3.132715  |
| 9             | 1             | 0           | -0.534319               | 3.214551  | -1.507282 |
| 10            | 6             | 0           | -1.063201               | 0.618509  | -1.052020 |
| 11            | 1             | 0           | -0.868321               | 1.015873  | -2.065550 |
| 12            | 7             | 0           | -0.009622               | -0.326715 | -0.673445 |
| 13            | 8             | 0           | -2.237967               | -0.166455 | -1.078690 |
| 14            | 6             | 0           | -1.882845               | -1.553862 | -1.192720 |
| 15            | 6             | 0           | -0.373562               | -1.523412 | -1.434231 |
| 16            | 1             | 0           | 0.127619                | -2.410527 | -1.045470 |
| 17            | 1             | 0           | -0.141175               | -1.408953 | -2.504402 |
| 18            | 1             | 0           | -2.435507               | -1.985446 | -2.023834 |
| 19            | 6             | 0           | -2.249155               | -2.292688 | 0.095714  |
| 20            | 1             | 0           | -2.174785               | -3.371560 | -0.099166 |
| 21            | 6             | 0           | -3.658660               | -1.991782 | 0.619648  |
| 22            | 1             | 0           | -3.775836               | -0.903481 | 0.695617  |
| 23            | 6             | 0           | -4.786104               | -2.551561 | -0.246051 |
| 24            | 1             | 0           | -4.665299               | -3.636688 | -0.319908 |
| 25            | 6             | 0           | -6.142669               | -2.245062 | 0.365739  |
| 26            | 1             | 0           | -6.917918               | -2.750169 | -0.221424 |
| 27            | 1             | 0           | -6.173661               | -2.595557 | 1.400735  |
| 28            | 8             | 0           | -1.348659               | -1.989994 | 1.162061  |
| 29            | 1             | 0           | -0.747117               | -1.282988 | 0.868828  |
| 30            | 8             | 0           | -3.796711               | -2.596242 | 1.895785  |
| 31            | 1             | 0           | -2.973968               | -2.403288 | 2.360108  |
| 32            | 8             | 0           | -4.737037               | -2.033303 | -1.563572 |
| 33            | 1             | 0           | -4.993809               | -1.105473 | -1.490285 |
| 34            | 8             | 0           | -6.294724               | -0.831868 | 0.285829  |
| 35            | 1             | 0           | -7.169074               | -0.596752 | 0.603029  |

|    |   |   |           |           |           |
|----|---|---|-----------|-----------|-----------|
| 36 | 6 | 0 | 1.336923  | 0.180983  | -0.908675 |
| 37 | 1 | 0 | 1.488629  | 0.376591  | -1.985086 |
| 38 | 1 | 0 | 1.422085  | 1.138747  | -0.386228 |
| 39 | 6 | 0 | 2.414899  | -0.766131 | -0.396998 |
| 40 | 1 | 0 | 2.205193  | -1.001522 | 0.652100  |
| 41 | 1 | 0 | 2.379161  | -1.710349 | -0.951123 |
| 42 | 6 | 0 | 3.811209  | -0.160704 | -0.526909 |
| 43 | 1 | 0 | 3.848610  | 0.783675  | 0.028873  |
| 44 | 1 | 0 | 4.005087  | 0.088275  | -1.577429 |
| 45 | 6 | 0 | 4.913716  | -1.087080 | -0.018217 |
| 46 | 1 | 0 | 4.879847  | -2.032069 | -0.573647 |
| 47 | 1 | 0 | 4.718631  | -1.337337 | 1.031442  |
| 48 | 6 | 0 | 6.309063  | -0.478344 | -0.141954 |
| 49 | 1 | 0 | 6.340362  | 0.468774  | 0.410220  |
| 50 | 1 | 0 | 6.504578  | -0.230589 | -1.192529 |
| 51 | 6 | 0 | 7.414626  | -1.397727 | 0.372445  |
| 52 | 1 | 0 | 7.221383  | -1.643974 | 1.423793  |
| 53 | 1 | 0 | 7.383580  | -2.346463 | -0.177333 |
| 54 | 6 | 0 | 8.810668  | -0.790482 | 0.246989  |
| 55 | 1 | 0 | 9.004522  | -0.545755 | -0.803239 |
| 56 | 1 | 0 | 8.842444  | 0.156438  | 0.796950  |
| 57 | 6 | 0 | 9.904247  | -1.719670 | 0.765603  |
| 58 | 1 | 0 | 9.910790  | -2.663156 | 0.212584  |
| 59 | 1 | 0 | 10.894608 | -1.269330 | 0.666526  |
| 60 | 1 | 0 | 9.748622  | -1.955060 | 1.822090  |
| 61 | 1 | 0 | -1.432681 | 4.705638  | 2.412339  |
| 62 | 8 | 0 | -0.634667 | 5.397421  | 0.123863  |
| 63 | 6 | 0 | -0.243638 | 5.691421  | -1.203291 |
| 64 | 1 | 0 | -1.038031 | 5.445744  | -1.915365 |
| 65 | 1 | 0 | -0.056350 | 6.763017  | -1.231210 |
| 66 | 1 | 0 | 0.673176  | 5.159816  | -1.478047 |

### Structure 39b (M06-2X, DMSO)

Energy (Hartrees): = - 1366.5168808  
No imaginary frequencies

Standard orientation:

| Center<br>Number | Atomic<br>Number | Atomic<br>Type | Coordinates (Angstroms) |           |           |
|------------------|------------------|----------------|-------------------------|-----------|-----------|
|                  |                  |                | X                       | Y         | Z         |
| 1                | 6                | 0              | -1.213407               | 1.749681  | -0.087452 |
| 2                | 6                | 0              | -1.649980               | 1.493368  | 1.208743  |
| 3                | 6                | 0              | -1.756136               | 2.547596  | 2.112108  |
| 4                | 6                | 0              | -1.432656               | 3.841697  | 1.730687  |
| 5                | 6                | 0              | -0.998363               | 4.098245  | 0.427575  |
| 6                | 6                | 0              | -0.890941               | 3.046239  | -0.486087 |
| 7                | 1                | 0              | -1.904086               | 0.482221  | 1.505661  |
| 8                | 1                | 0              | -2.096165               | 2.361332  | 3.124611  |
| 9                | 1                | 0              | -0.559067               | 3.217017  | -1.503279 |
| 10               | 6                | 0              | -1.060565               | 0.614110  | -1.070346 |
| 11               | 1                | 0              | -0.861225               | 1.019348  | -2.077399 |
| 12               | 7                | 0              | -0.002494               | -0.323302 | -0.686028 |
| 13               | 8                | 0              | -2.232190               | -0.181767 | -1.109980 |
| 14               | 6                | 0              | -1.861041               | -1.567879 | -1.210760 |
| 15               | 6                | 0              | -0.354833               | -1.520180 | -1.456743 |
| 16               | 1                | 0              | 0.158656                | -2.404960 | -1.079461 |
| 17               | 1                | 0              | -0.128662               | -1.390201 | -2.525101 |
| 18               | 1                | 0              | -2.407627               | -2.014512 | -2.037233 |
| 19               | 6                | 0              | -2.215868               | -2.302575 | 0.083840  |
| 20               | 1                | 0              | -2.143536               | -3.381017 | -0.110630 |
| 21               | 6                | 0              | -3.619488               | -1.995991 | 0.620683  |
| 22               | 1                | 0              | -3.737710               | -0.906689 | 0.674819  |
| 23               | 6                | 0              | -4.757917               | -2.576727 | -0.216113 |
| 24               | 1                | 0              | -4.637114               | -3.662825 | -0.267878 |
| 25               | 6                | 0              | -6.108580               | -2.256966 | 0.400096  |
| 26               | 1                | 0              | -6.889295               | -2.762281 | -0.178149 |
| 27               | 1                | 0              | -6.142707               | -2.601926 | 1.436828  |
| 28               | 8                | 0              | -1.302979               | -1.995241 | 1.141181  |
| 29               | 1                | 0              | -0.708057               | -1.286955 | 0.831926  |
| 30               | 8                | 0              | -3.737086               | -2.567449 | 1.916042  |
| 31               | 1                | 0              | -2.902479               | -2.364042 | 2.355129  |
| 32               | 8                | 0              | -4.724195               | -2.087050 | -1.547269 |
| 33               | 1                | 0              | -4.981003               | -1.158029 | -1.488408 |
| 34               | 8                | 0              | -6.258981               | -0.842267 | 0.316058  |
| 35               | 1                | 0              | -7.162017               | -0.619150 | 0.559362  |
| 36               | 6                | 0              | 1.341400                | 0.195035  | -0.927954 |
| 37               | 1                | 0              | 1.483829                | 0.391486  | -2.003844 |
| 38               | 1                | 0              | 1.425883                | 1.152781  | -0.404731 |
| 39               | 6                | 0              | 2.423350                | -0.749501 | -0.422091 |
| 40               | 1                | 0              | 2.215072                | -0.994681 | 0.625745  |
| 41               | 1                | 0              | 2.393825                | -1.688177 | -0.985668 |
| 42               | 6                | 0              | 3.815499                | -0.134000 | -0.542384 |
| 43               | 1                | 0              | 3.844889                | 0.805372  | 0.022558  |
| 44               | 1                | 0              | 4.010773                | 0.123566  | -1.590471 |

|    |   |   |           |           |           |
|----|---|---|-----------|-----------|-----------|
| 45 | 6 | 0 | 4.918775  | -1.060153 | -0.036618 |
| 46 | 1 | 0 | 4.894231  | -1.997929 | -0.604878 |
| 47 | 1 | 0 | 4.716876  | -1.322825 | 1.009119  |
| 48 | 6 | 0 | 6.311797  | -0.443624 | -0.140889 |
| 49 | 1 | 0 | 6.333046  | 0.497636  | 0.422025  |
| 50 | 1 | 0 | 6.516838  | -0.186356 | -1.187477 |
| 51 | 6 | 0 | 7.414047  | -1.364390 | 0.376843  |
| 52 | 1 | 0 | 7.209442  | -1.620452 | 1.423980  |
| 53 | 1 | 0 | 7.392692  | -2.307084 | -0.184010 |
| 54 | 6 | 0 | 8.809538  | -0.752712 | 0.274137  |
| 55 | 1 | 0 | 9.017011  | -0.502144 | -0.772260 |
| 56 | 1 | 0 | 8.831563  | 0.190236  | 0.831719  |
| 57 | 6 | 0 | 9.895926  | -1.684551 | 0.802540  |
| 58 | 1 | 0 | 9.906795  | -2.625849 | 0.245264  |
| 59 | 1 | 0 | 10.888463 | -1.235505 | 0.716540  |
| 60 | 1 | 0 | 9.725937  | -1.922598 | 1.856530  |
| 61 | 1 | 0 | -1.512225 | 4.670585  | 2.424406  |
| 62 | 8 | 0 | -0.706919 | 5.388166  | 0.138670  |
| 63 | 6 | 0 | -0.316044 | 5.692789  | -1.192440 |
| 64 | 1 | 0 | -1.103884 | 5.429982  | -1.904536 |
| 65 | 1 | 0 | -0.150098 | 6.767804  | -1.217352 |
| 66 | 1 | 0 | 0.610313  | 5.177738  | -1.463116 |

### Structure 39c (M06-2X, Gas Phase)

Energy (Hartrees): = - 1366.4853011

No imaginary frequencies

Standard orientation:

| Center<br>Number | Atomic<br>Number | Atomic<br>Type | Coordinates (Angstroms) |           |           |
|------------------|------------------|----------------|-------------------------|-----------|-----------|
|                  |                  |                | X                       | Y         | Z         |
| 1                | 6                | 0              | 2.944410                | -1.776177 | -0.287589 |
| 2                | 6                | 0              | 1.637174                | -1.914586 | -1.060824 |
| 3                | 6                | 0              | 3.375778                | -0.310975 | -0.362930 |
| 4                | 1                | 0              | 1.285862                | -2.944570 | -0.981157 |
| 5                | 1                | 0              | 1.791442                | -1.675680 | -2.127936 |
| 6                | 1                | 0              | 3.721623                | -2.411839 | -0.707966 |
| 7                | 1                | 0              | 3.539325                | -0.017765 | -1.411988 |
| 8                | 8                | 0              | 2.316429                | 0.484032  | 0.174523  |
| 9                | 7                | 0              | 0.634348                | -1.039154 | -0.444619 |
| 10               | 6                | 0              | 4.608685                | 0.047510  | 0.465390  |
| 11               | 1                | 0              | 4.531797                | -0.476677 | 1.426457  |
| 12               | 6                | 0              | 5.906792                | -0.342554 | -0.223649 |
| 13               | 1                | 0              | 5.972512                | 0.207776  | -1.173566 |
| 14               | 6                | 0              | 7.106920                | 0.034902  | 0.626040  |
| 15               | 1                | 0              | 7.004542                | -0.439441 | 1.610070  |
| 16               | 1                | 0              | 7.155688                | 1.120006  | 0.742173  |
| 17               | 8                | 0              | 4.684045                | 1.448413  | 0.649756  |
| 18               | 1                | 0              | 3.786018                | 1.749970  | 0.823085  |
| 19               | 8                | 0              | 5.908011                | -1.736187 | -0.455758 |
| 20               | 1                | 0              | 6.824387                | -1.967457 | -0.645308 |
| 21               | 8                | 0              | 8.239257                | -0.478983 | -0.068117 |
| 22               | 1                | 0              | 9.013344                | -0.388955 | 0.489568  |
| 23               | 8                | 0              | 2.744482                | -2.171428 | 1.052368  |
| 24               | 1                | 0              | 1.916932                | -1.752559 | 1.320482  |
| 25               | 6                | 0              | -0.698407               | -1.233916 | -1.032614 |
| 26               | 1                | 0              | -0.706410               | -2.216310 | -1.513896 |
| 27               | 1                | 0              | -0.878655               | -0.503803 | -1.838089 |
| 28               | 6                | 0              | 0.110527                | 1.300692  | 0.127778  |
| 29               | 6                | 0              | 0.052358                | 1.382408  | 1.512274  |
| 30               | 6                | 0              | -0.778896               | 2.024517  | -0.665218 |
| 31               | 6                | 0              | -0.924723               | 2.175634  | 2.107709  |
| 32               | 1                | 0              | 0.758083                | 0.817792  | 2.107805  |
| 33               | 6                | 0              | -1.762048               | 2.807238  | -0.060689 |
| 34               | 1                | 0              | -0.699722               | 1.960155  | -1.743152 |
| 35               | 6                | 0              | -1.835154               | 2.875044  | 1.332820  |
| 36               | 1                | 0              | -0.982858               | 2.242841  | 3.187647  |
| 37               | 6                | 0              | 1.094618                | 0.353639  | -0.513959 |
| 38               | 1                | 0              | 1.254414                | 0.638212  | -1.574391 |
| 39               | 6                | 0              | -1.843329               | -1.188939 | -0.023904 |
| 40               | 1                | 0              | -1.698679               | -1.998004 | 0.699655  |
| 41               | 1                | 0              | -1.819739               | -0.255480 | 0.540954  |
| 42               | 6                | 0              | -3.202200               | -1.324629 | -0.705509 |
| 43               | 1                | 0              | -3.312340               | -0.527166 | -1.452038 |
| 44               | 1                | 0              | -3.254271               | -2.272762 | -1.255393 |
| 45               | 6                | 0              | -4.364264               | -1.243669 | 0.281225  |
| 46               | 1                | 0              | -4.310262               | -0.287814 | 0.816417  |
| 47               | 1                | 0              | -4.251364               | -2.028376 | 1.038803  |
| 48               | 6                | 0              | -5.731418               | -1.376442 | -0.384614 |
| 49               | 1                | 0              | -5.842466               | -0.594357 | -1.145687 |
| 50               | 1                | 0              | -5.785374               | -2.334064 | -0.916841 |
| 51               | 6                | 0              | -6.890176               | -1.284149 | 0.605064  |
| 52               | 1                | 0              | -6.839261               | -0.324413 | 1.133683  |
| 53               | 1                | 0              | -6.776202               | -2.062027 | 1.369942  |

|    |   |   |            |           |           |
|----|---|---|------------|-----------|-----------|
| 54 | 6 | 0 | -8.260287  | -1.424223 | -0.054408 |
| 55 | 1 | 0 | -8.373711  | -0.647026 | -0.817968 |
| 56 | 1 | 0 | -8.309366  | -2.383425 | -0.581188 |
| 57 | 6 | 0 | -9.406236  | -1.330578 | 0.949939  |
| 58 | 1 | 0 | -9.393336  | -0.366928 | 1.465767  |
| 59 | 1 | 0 | -10.378038 | -1.438428 | 0.464408  |
| 60 | 1 | 0 | -9.321185  | -2.113149 | 1.708472  |
| 61 | 1 | 0 | -2.606586  | 3.493180  | 1.774633  |
| 62 | 8 | 0 | -2.683647  | 3.536501  | -0.738108 |
| 63 | 6 | 0 | -2.659554  | 3.479654  | -2.148500 |
| 64 | 1 | 0 | -3.477296  | 4.110603  | -2.488634 |
| 65 | 1 | 0 | -1.714717  | 3.864161  | -2.545828 |
| 66 | 1 | 0 | -2.816605  | 2.456638  | -2.506972 |

### Structure 39c (M06-2X, Benzene)

Energy (Hartrees): = - 1366.5127377  
 No imaginary frequencies

Standard orientation:

| Center<br>Number | Atomic<br>Number | Atomic<br>Type | Coordinates (Angstroms) |           |           |
|------------------|------------------|----------------|-------------------------|-----------|-----------|
|                  |                  |                | X                       | Y         | Z         |
| 1                | 6                | 0              | 2.902977                | -1.779229 | -0.343322 |
| 2                | 6                | 0              | 1.592802                | -1.878358 | -1.117533 |
| 3                | 6                | 0              | 3.364932                | -0.323128 | -0.395872 |
| 4                | 1                | 0              | 1.221349                | -2.902689 | -1.059202 |
| 5                | 1                | 0              | 1.752439                | -1.620813 | -2.178825 |
| 6                | 1                | 0              | 3.663974                | -2.425731 | -0.776600 |
| 7                | 1                | 0              | 3.537867                | -0.021526 | -1.440710 |
| 8                | 8                | 0              | 2.321339                | 0.487259  | 0.150292  |
| 9                | 7                | 0              | 0.608224                | -0.995730 | -0.481852 |
| 10               | 6                | 0              | 4.599935                | 0.009277  | 0.440019  |
| 11               | 1                | 0              | 4.491993                | -0.482830 | 1.414676  |
| 12               | 6                | 0              | 5.898144                | -0.445723 | -0.208801 |
| 13               | 1                | 0              | 5.986829                | 0.034964  | -1.194225 |
| 14               | 6                | 0              | 7.097988                | -0.036707 | 0.627912  |
| 15               | 1                | 0              | 6.975367                | -0.432436 | 1.643781  |
| 16               | 1                | 0              | 7.180563                | 1.051856  | 0.665965  |
| 17               | 8                | 0              | 4.714270                | 1.413751  | 0.588001  |
| 18               | 1                | 0              | 3.823961                | 1.739592  | 0.760180  |
| 19               | 8                | 0              | 5.877107                | -1.853257 | -0.343962 |
| 20               | 1                | 0              | 6.794945                | -2.111608 | -0.488655 |
| 21               | 8                | 0              | 8.226439                | -0.627359 | -0.011072 |
| 22               | 1                | 0              | 8.985445                | -0.549699 | 0.571259  |
| 23               | 8                | 0              | 2.695012                | -2.194000 | 0.991510  |
| 24               | 1                | 0              | 1.872336                | -1.765880 | 1.262406  |
| 25               | 6                | 0              | -0.731499               | -1.160095 | -1.066206 |
| 26               | 1                | 0              | -0.755229               | -2.132323 | -1.566769 |
| 27               | 1                | 0              | -0.905887               | -0.410207 | -1.853965 |
| 28               | 6                | 0              | 0.131759                | 1.345444  | 0.130623  |
| 29               | 6                | 0              | 0.079965                | 1.400035  | 1.517397  |
| 30               | 6                | 0              | -0.739865               | 2.110036  | -0.644247 |
| 31               | 6                | 0              | -0.869490               | 2.211348  | 2.132730  |
| 32               | 1                | 0              | 0.769468                | 0.803925  | 2.101651  |
| 33               | 6                | 0              | -1.696317               | 2.911250  | -0.019788 |
| 34               | 1                | 0              | -0.667805               | 2.064711  | -1.723688 |
| 35               | 6                | 0              | -1.760325               | 2.955002  | 1.375604  |
| 36               | 1                | 0              | -0.921544               | 2.258841  | 3.214301  |
| 37               | 6                | 0              | 1.092149                | 0.389381  | -0.534671 |
| 38               | 1                | 0              | 1.250226                | 0.687044  | -1.590449 |
| 39               | 6                | 0              | -1.867760               | -1.123196 | -0.047439 |
| 40               | 1                | 0              | -1.706034               | -1.926933 | 0.678854  |
| 41               | 1                | 0              | -1.851249               | -0.185463 | 0.511603  |
| 42               | 6                | 0              | -3.230473               | -1.283390 | -0.716726 |
| 43               | 1                | 0              | -3.360635               | -0.490231 | -1.464507 |
| 44               | 1                | 0              | -3.267189               | -2.234230 | -1.263153 |
| 45               | 6                | 0              | -4.388446               | -1.224964 | 0.277033  |
| 46               | 1                | 0              | -4.359705               | -0.263195 | 0.803614  |
| 47               | 1                | 0              | -4.249882               | -2.000139 | 1.040242  |
| 48               | 6                | 0              | -5.754185               | -1.404151 | -0.381981 |
| 49               | 1                | 0              | -5.891795               | -0.629850 | -1.146749 |
| 50               | 1                | 0              | -5.778064               | -2.366057 | -0.908871 |
| 51               | 6                | 0              | -6.914995               | -1.345531 | 0.608423  |
| 52               | 1                | 0              | -6.898392               | -0.381516 | 1.131511  |
| 53               | 1                | 0              | -6.775553               | -2.115607 | 1.377061  |
| 54               | 6                | 0              | -8.278619               | -1.537151 | -0.052570 |
| 55               | 1                | 0              | -8.420982               | -0.762873 | -0.814460 |
| 56               | 1                | 0              | -8.290039               | -2.496860 | -0.580981 |
| 57               | 6                | 0              | -9.430147               | -1.490262 | 0.946957  |
| 58               | 1                | 0              | -9.455248               | -0.530960 | 1.471407  |
| 59               | 1                | 0              | -10.396043              | -1.625827 | 0.454988  |
| 60               | 1                | 0              | -9.326684               | -2.276073 | 1.700588  |
| 61               | 1                | 0              | -2.509279               | 3.587615  | 1.836255  |
| 62               | 8                | 0              | -2.596373               | 3.679606  | -0.679492 |

|    |   |   |           |          |           |
|----|---|---|-----------|----------|-----------|
| 63 | 6 | 0 | -2.581030 | 3.646529 | -2.093673 |
| 64 | 1 | 0 | -3.383637 | 4.305418 | -2.418971 |
| 65 | 1 | 0 | -1.630124 | 4.015221 | -2.491284 |
| 66 | 1 | 0 | -2.770688 | 2.635988 | -2.470768 |

### Structure 39c (M06-2X, DMSO)

Energy (Hartrees): = - 1366.5148779  
 No imaginary frequencies

Standard orientation:

| Center<br>Number | Atomic<br>Number | Atomic<br>Type | Coordinates (Angstroms) |           |           |
|------------------|------------------|----------------|-------------------------|-----------|-----------|
|                  |                  |                | X                       | Y         | Z         |
| 1                | 6                | 0              | 2.912994                | -1.782957 | -0.289352 |
| 2                | 6                | 0              | 1.591590                | -1.907015 | -1.037871 |
| 3                | 6                | 0              | 3.365398                | -0.327534 | -0.382651 |
| 4                | 1                | 0              | 1.225114                | -2.931480 | -0.955080 |
| 5                | 1                | 0              | 1.734068                | -1.668048 | -2.104508 |
| 6                | 1                | 0              | 3.667063                | -2.436660 | -0.723537 |
| 7                | 1                | 0              | 3.508713                | -0.050045 | -1.437638 |
| 8                | 8                | 0              | 2.327978                | 0.486987  | 0.172602  |
| 9                | 7                | 0              | 0.608864                | -1.015144 | -0.406977 |
| 10               | 6                | 0              | 4.619502                | 0.032831  | 0.410193  |
| 11               | 1                | 0              | 4.537898                | -0.414383 | 1.408750  |
| 12               | 6                | 0              | 5.901009                | -0.457144 | -0.246764 |
| 13               | 1                | 0              | 5.940663                | -0.071958 | -1.276222 |
| 14               | 6                | 0              | 7.126179                | 0.040305  | 0.501244  |
| 15               | 1                | 0              | 7.048123                | -0.254639 | 1.554824  |
| 16               | 1                | 0              | 7.199963                | 1.127921  | 0.433483  |
| 17               | 8                | 0              | 4.734040                | 1.444646  | 0.496867  |
| 18               | 1                | 0              | 3.842226                | 1.772063  | 0.661109  |
| 19               | 8                | 0              | 5.900710                | -1.873909 | -0.251036 |
| 20               | 1                | 0              | 6.819645                | -2.126504 | -0.403560 |
| 21               | 8                | 0              | 8.240001                | -0.596257 | -0.120149 |
| 22               | 1                | 0              | 9.004107                | -0.500866 | 0.455826  |
| 23               | 8                | 0              | 2.732970                | -2.168990 | 1.062191  |
| 24               | 1                | 0              | 1.922192                | -1.722151 | 1.340533  |
| 25               | 6                | 0              | -0.727801               | -1.188009 | -1.003381 |
| 26               | 1                | 0              | -0.748885               | -2.169156 | -1.485597 |
| 27               | 1                | 0              | -0.890039               | -0.450204 | -1.803556 |
| 28               | 6                | 0              | 0.130634                | 1.335222  | 0.153888  |
| 29               | 6                | 0              | 0.085670                | 1.418631  | 1.540790  |
| 30               | 6                | 0              | -0.751525               | 2.073674  | -0.634139 |
| 31               | 6                | 0              | -0.867880               | 2.235597  | 2.143706  |
| 32               | 1                | 0              | 0.780380                | 0.839912  | 2.137338  |
| 33               | 6                | 0              | -1.713216               | 2.879903  | -0.021732 |
| 34               | 1                | 0              | -0.687764               | 1.997288  | -1.712596 |
| 35               | 6                | 0              | -1.769600               | 2.954992  | 1.374018  |
| 36               | 1                | 0              | -0.915513               | 2.306952  | 3.224532  |
| 37               | 6                | 0              | 1.090082                | 0.370756  | -0.500005 |
| 38               | 1                | 0              | 1.235239                | 0.642559  | -1.562137 |
| 39               | 6                | 0              | -1.875787               | -1.132818 | 0.001409  |
| 40               | 1                | 0              | -1.738510               | -1.937138 | 0.732867  |
| 41               | 1                | 0              | -1.857354               | -0.191700 | 0.556362  |
| 42               | 6                | 0              | -3.229752               | -1.278602 | -0.688392 |
| 43               | 1                | 0              | -3.342762               | -0.478611 | -1.431463 |
| 44               | 1                | 0              | -3.261816               | -2.225024 | -1.242344 |
| 45               | 6                | 0              | -4.401999               | -1.223357 | 0.287920  |
| 46               | 1                | 0              | -4.372578               | -0.270471 | 0.831357  |
| 47               | 1                | 0              | -4.285317               | -2.013927 | 1.039265  |
| 48               | 6                | 0              | -5.758156               | -1.374322 | -0.396873 |
| 49               | 1                | 0              | -5.876088               | -0.581151 | -1.145524 |
| 50               | 1                | 0              | -5.781988               | -2.324451 | -0.944773 |
| 51               | 6                | 0              | -6.933113               | -1.327408 | 0.576581  |
| 52               | 1                | 0              | -6.915310               | -0.376061 | 1.122757  |
| 53               | 1                | 0              | -6.813728               | -2.118334 | 1.327494  |
| 54               | 6                | 0              | -8.287715               | -1.488240 | -0.109843 |
| 55               | 1                | 0              | -8.411046               | -0.693840 | -0.854318 |
| 56               | 1                | 0              | -8.300645               | -2.435275 | -0.660759 |
| 57               | 6                | 0              | -9.451906               | -1.453083 | 0.875169  |
| 58               | 1                | 0              | -9.475003               | -0.504340 | 1.419211  |
| 59               | 1                | 0              | -10.412944              | -1.570315 | 0.368530  |
| 60               | 1                | 0              | -9.363637               | -2.255928 | 1.613029  |
| 61               | 1                | 0              | -2.520706               | 3.589802  | 1.829402  |
| 62               | 8                | 0              | -2.623138               | 3.622093  | -0.694978 |
| 63               | 6                | 0              | -2.615497               | 3.544119  | -2.113185 |
| 64               | 1                | 0              | -3.425984               | 4.185191  | -2.453807 |
| 65               | 1                | 0              | -1.669163               | 3.907084  | -2.524728 |
| 66               | 1                | 0              | -2.795808               | 2.520094  | -2.454041 |

### Structure 39d (M06-2X, Gas Phase)

Energy (Hartrees): = - 1366.486348

No imaginary frequencies

Standard orientation:

| Center<br>Number | Atomic<br>Number | Atomic<br>Type | Coordinates (Angstroms) |           |           |
|------------------|------------------|----------------|-------------------------|-----------|-----------|
|                  |                  |                | X                       | Y         | Z         |
| 1                | 6                | 0              | 1.845618                | -1.415967 | -1.365732 |
| 2                | 6                | 0              | 0.834703                | -0.355019 | -1.815989 |
| 3                | 6                | 0              | 2.451584                | -0.936634 | -0.046451 |
| 4                | 1                | 0              | 0.328484                | -0.685434 | -2.723736 |
| 5                | 1                | 0              | 1.367553                | 0.574962  | -2.044705 |
| 6                | 1                | 0              | 2.632192                | -1.545799 | -2.108004 |
| 7                | 1                | 0              | 2.945004                | 0.031359  | -0.200506 |
| 8                | 8                | 0              | 1.370028                | -0.776769 | 0.884852  |
| 9                | 7                | 0              | -0.175712               | -0.069369 | -0.793115 |
| 10               | 6                | 0              | 3.433322                | -1.896181 | 0.629625  |
| 11               | 1                | 0              | 3.064993                | -2.923392 | 0.507092  |
| 12               | 6                | 0              | 4.830589                | -1.796998 | 0.040058  |
| 13               | 1                | 0              | 5.197276                | -0.771241 | 0.191482  |
| 14               | 6                | 0              | 5.787765                | -2.750631 | 0.731556  |
| 15               | 1                | 0              | 5.385454                | -3.768793 | 0.657596  |
| 16               | 1                | 0              | 5.898770                | -2.472677 | 1.782412  |
| 17               | 8                | 0              | 3.568439                | -1.565737 | 2.000725  |
| 18               | 1                | 0              | 2.678066                | -1.385819 | 2.321290  |
| 19               | 8                | 0              | 4.762848                | -2.103318 | -1.336977 |
| 20               | 1                | 0              | 5.671965                | -2.263124 | -1.614087 |
| 21               | 8                | 0              | 7.014630                | -2.638251 | 0.018130  |
| 22               | 1                | 0              | 7.611345                | -3.327466 | 0.313732  |
| 23               | 8                | 0              | 1.217302                | -2.676154 | -1.200468 |
| 24               | 1                | 0              | 0.725329                | -2.632545 | -0.373916 |
| 25               | 6                | 0              | -1.305527               | -0.998401 | -0.707975 |
| 26               | 1                | 0              | -1.148415               | -1.767387 | 0.065929  |
| 27               | 1                | 0              | -1.386236               | -1.532616 | -1.657395 |
| 28               | 6                | 0              | 1.036289                | 1.620551  | 0.541598  |
| 29               | 6                | 0              | 0.487663                | 2.638974  | -0.219872 |
| 30               | 6                | 0              | 2.089474                | 1.897070  | 1.419683  |
| 31               | 6                | 0              | 0.981033                | 3.942629  | -0.118838 |
| 32               | 1                | 0              | -0.324891               | 2.434419  | -0.906195 |
| 33               | 6                | 0              | 2.575184                | 3.190752  | 1.513004  |
| 34               | 1                | 0              | 2.536558                | 1.096968  | 1.997414  |
| 35               | 6                | 0              | 2.030555                | 4.224854  | 0.752314  |
| 36               | 1                | 0              | 3.396501                | 3.408583  | 2.185513  |
| 37               | 6                | 0              | 0.423475                | 0.225499  | 0.481257  |
| 38               | 1                | 0              | -0.355943               | 0.166357  | 1.245295  |
| 39               | 6                | 0              | -2.608269               | -0.258170 | -0.421411 |
| 40               | 1                | 0              | -2.510255               | 0.308907  | 0.512398  |
| 41               | 1                | 0              | -2.765319               | 0.479612  | -1.214790 |
| 42               | 6                | 0              | -3.809433               | -1.194912 | -0.326830 |
| 43               | 1                | 0              | -3.913237               | -1.747548 | -1.268561 |
| 44               | 1                | 0              | -3.632090               | -1.945947 | 0.452664  |
| 45               | 6                | 0              | -5.113103               | -0.457963 | -0.028667 |
| 46               | 1                | 0              | -5.276965               | 0.309999  | -0.794052 |
| 47               | 1                | 0              | -5.017020               | 0.074330  | 0.925358  |
| 48               | 6                | 0              | -6.327793               | -1.381028 | 0.027645  |
| 49               | 1                | 0              | -6.429624               | -1.904357 | -0.930802 |
| 50               | 1                | 0              | -6.161849               | -2.155936 | 0.785863  |
| 51               | 6                | 0              | -7.626251               | -0.640454 | 0.338218  |
| 52               | 1                | 0              | -7.786197               | 0.141627  | -0.414056 |
| 53               | 1                | 0              | -7.528104               | -0.124797 | 1.301399  |
| 54               | 6                | 0              | -8.848162               | -1.555502 | 0.379440  |
| 55               | 1                | 0              | -8.946182               | -2.067397 | -0.583988 |
| 56               | 1                | 0              | -8.687536               | -2.337261 | 1.129698  |
| 57               | 6                | 0              | -10.135948              | -0.797455 | 0.692459  |
| 58               | 1                | 0              | -10.324371              | -0.027176 | -0.059961 |
| 59               | 1                | 0              | -11.000773              | -1.463172 | 0.714900  |
| 60               | 1                | 0              | -10.067935              | -0.301738 | 1.664381  |
| 61               | 1                | 0              | 2.431390                | 5.224702  | 0.846014  |
| 62               | 8                | 0              | 0.373803                | 4.861114  | -0.913495 |
| 63               | 6                | 0              | 0.848941                | 6.188961  | -0.860705 |
| 64               | 1                | 0              | 1.901279                | 6.246048  | -1.157744 |
| 65               | 1                | 0              | 0.243575                | 6.753966  | -1.565760 |
| 66               | 1                | 0              | 0.730542                | 6.614421  | 0.141152  |

### Structure 39d (M06-2X, Benzene)

Energy (Hartrees): = - 1366.5136424

No imaginary frequencies

Standard orientation:

| Center<br>Number | Atomic<br>Number | Atomic<br>Type | Coordinates (Angstroms) |           |           |
|------------------|------------------|----------------|-------------------------|-----------|-----------|
|                  |                  |                | X                       | Y         | Z         |
| 1                | 6                | 0              | 1.858075                | -1.421381 | -1.352498 |
| 2                | 6                | 0              | 0.833693                | -0.374192 | -1.803466 |

|    |   |   |            |           |           |
|----|---|---|------------|-----------|-----------|
| 3  | 6 | 0 | 2.475770   | -0.922634 | -0.045965 |
| 4  | 1 | 0 | 0.321036   | -0.716915 | -2.703024 |
| 5  | 1 | 0 | 1.360560   | 0.554909  | -2.048762 |
| 6  | 1 | 0 | 2.636139   | -1.550457 | -2.103704 |
| 7  | 1 | 0 | 2.963364   | 0.044638  | -0.220611 |
| 8  | 8 | 0 | 1.405110   | -0.754856 | 0.895963  |
| 9  | 7 | 0 | -0.167764  | -0.085320 | -0.773260 |
| 10 | 6 | 0 | 3.470646   | -1.865803 | 0.635431  |
| 11 | 1 | 0 | 3.100812   | -2.895977 | 0.549886  |
| 12 | 6 | 0 | 4.858234   | -1.786947 | 0.018976  |
| 13 | 1 | 0 | 5.221175   | -0.752647 | 0.111473  |
| 14 | 6 | 0 | 5.834402   | -2.701303 | 0.737307  |
| 15 | 1 | 0 | 5.437169   | -3.723947 | 0.732315  |
| 16 | 1 | 0 | 5.974973   | -2.368037 | 1.768528  |
| 17 | 8 | 0 | 3.627063   | -1.498365 | 1.996277  |
| 18 | 1 | 0 | 2.740696   | -1.308770 | 2.323916  |
| 19 | 8 | 0 | 4.769279   | -2.161590 | -1.341298 |
| 20 | 1 | 0 | 5.674432   | -2.343865 | -1.619561 |
| 21 | 8 | 0 | 7.045597   | -2.627312 | -0.008933 |
| 22 | 1 | 0 | 7.635519   | -3.321884 | 0.292333  |
| 23 | 8 | 0 | 1.244484   | -2.688062 | -1.167988 |
| 24 | 1 | 0 | 0.746083   | -2.635578 | -0.345117 |
| 25 | 6 | 0 | -1.294705  | -1.018234 | -0.671731 |
| 26 | 1 | 0 | -1.131349  | -1.778326 | 0.109378  |
| 27 | 1 | 0 | -1.377642  | -1.559998 | -1.616618 |
| 28 | 6 | 0 | 1.032876   | 1.636522  | 0.532677  |
| 29 | 6 | 0 | 0.448550   | 2.643717  | -0.218633 |
| 30 | 6 | 0 | 2.100077   | 1.936605  | 1.386068  |
| 31 | 6 | 0 | 0.918886   | 3.957511  | -0.132018 |
| 32 | 1 | 0 | -0.375715  | 2.422810  | -0.885953 |
| 33 | 6 | 0 | 2.565172   | 3.239632  | 1.463589  |
| 34 | 1 | 0 | 2.573612   | 1.148377  | 1.959020  |
| 35 | 6 | 0 | 1.984605   | 4.261304  | 0.712890  |
| 36 | 1 | 0 | 3.398645   | 3.475068  | 2.115482  |
| 37 | 6 | 0 | 0.440226   | 0.230496  | 0.491657  |
| 38 | 1 | 0 | -0.330080  | 0.168650  | 1.264612  |
| 39 | 6 | 0 | -2.600634  | -0.280976 | -0.389796 |
| 40 | 1 | 0 | -2.506536  | 0.289520  | 0.542410  |
| 41 | 1 | 0 | -2.759020  | 0.451725  | -1.187958 |
| 42 | 6 | 0 | -3.799486  | -1.221545 | -0.296289 |
| 43 | 1 | 0 | -3.894058  | -1.780532 | -1.235338 |
| 44 | 1 | 0 | -3.624850  | -1.965767 | 0.490262  |
| 45 | 6 | 0 | -5.108750  | -0.487275 | -0.013779 |
| 46 | 1 | 0 | -5.268794  | 0.274251  | -0.786461 |
| 47 | 1 | 0 | -5.022445  | 0.051707  | 0.937463  |
| 48 | 6 | 0 | -6.321278  | -1.414266 | 0.038789  |
| 49 | 1 | 0 | -6.411524  | -1.946066 | -0.916228 |
| 50 | 1 | 0 | -6.160147  | -2.181480 | 0.805898  |
| 51 | 6 | 0 | -7.626447  | -0.676389 | 0.329571  |
| 52 | 1 | 0 | -7.783209  | 0.096521  | -0.432878 |
| 53 | 1 | 0 | -7.539590  | -0.150308 | 1.288252  |
| 54 | 6 | 0 | -8.845327  | -1.596057 | 0.370012  |
| 55 | 1 | 0 | -8.933944  | -2.119135 | -0.588558 |
| 56 | 1 | 0 | -8.689985  | -2.368292 | 1.131474  |
| 57 | 6 | 0 | -10.139050 | -0.841542 | 0.662317  |
| 58 | 1 | 0 | -10.330478 | -0.083618 | -0.102509 |
| 59 | 1 | 0 | -11.000132 | -1.513093 | 0.688849  |
| 60 | 1 | 0 | -10.083990 | -0.330801 | 1.627763  |
| 61 | 1 | 0 | 2.369642   | 5.268728  | 0.792617  |
| 62 | 8 | 0 | 0.276009   | 4.862792  | -0.910253 |
| 63 | 6 | 0 | 0.721345   | 6.204483  | -0.862009 |
| 64 | 1 | 0 | 1.761072   | 6.291348  | -1.193606 |
| 65 | 1 | 0 | 0.081433   | 6.759673  | -1.545188 |
| 66 | 1 | 0 | 0.619864   | 6.623614  | 0.144214  |

### Structure 39d (M06-2X, DMSO)

Energy (Hartrees): = - 1366.5146845  
 No imaginary frequencies

Standard orientation:

| Center<br>Number | Atomic<br>Number | Atomic<br>Type | Coordinates (Angstroms) |           |           |
|------------------|------------------|----------------|-------------------------|-----------|-----------|
|                  |                  |                | X                       | Y         | Z         |
| 1                | 6                | 0              | 1.858117                | -1.390975 | -1.370286 |
| 2                | 6                | 0              | 0.850717                | -0.331936 | -1.829681 |
| 3                | 6                | 0              | 2.457979                | -0.909788 | -0.050802 |
| 4                | 1                | 0              | 0.347965                | -0.664236 | -2.738902 |
| 5                | 1                | 0              | 1.396904                | 0.589201  | -2.063001 |
| 6                | 1                | 0              | 2.647079                | -1.510454 | -2.111668 |
| 7                | 1                | 0              | 2.966757                | 0.048319  | -0.217259 |
| 8                | 8                | 0              | 1.376710                | -0.725074 | 0.875575  |
| 9                | 7                | 0              | -0.164237               | -0.031890 | -0.814860 |
| 10               | 6                | 0              | 3.423322                | -1.864470 | 0.651875  |
| 11               | 1                | 0              | 3.006027                | -2.879341 | 0.629876  |



|    |   |   |            |           |           |
|----|---|---|------------|-----------|-----------|
| 12 | 6 | 0 | 4.801197   | -1.890095 | 0.008920  |
| 13 | 1 | 0 | 5.193067   | -0.862988 | -0.028085 |
| 14 | 6 | 0 | 5.768411   | -2.744871 | 0.809469  |
| 15 | 1 | 0 | 5.344763   | -3.748779 | 0.933580  |
| 16 | 1 | 0 | 5.944843   | -2.301744 | 1.792176  |
| 17 | 8 | 0 | 3.616858   | -1.433535 | 1.991365  |
| 18 | 1 | 0 | 2.740181   | -1.208231 | 2.324699  |
| 19 | 8 | 0 | 4.681274   | -2.418415 | -1.299980 |
| 20 | 1 | 0 | 5.577909   | -2.669485 | -1.554360 |
| 21 | 8 | 0 | 6.965358   | -2.792889 | 0.037098  |
| 22 | 1 | 0 | 7.522576   | -3.495715 | 0.383724  |
| 23 | 8 | 0 | 1.238541   | -2.660352 | -1.216395 |
| 24 | 1 | 0 | 0.717376   | -2.618785 | -0.406091 |
| 25 | 6 | 0 | -1.290937  | -0.969773 | -0.724517 |
| 26 | 1 | 0 | -1.122554  | -1.743781 | 0.040623  |
| 27 | 1 | 0 | -1.381138  | -1.487660 | -1.682148 |
| 28 | 6 | 0 | 1.039661   | 1.671111  | 0.515062  |
| 29 | 6 | 0 | 0.475883   | 2.692391  | -0.234804 |
| 30 | 6 | 0 | 2.100917   | 1.954703  | 1.381793  |
| 31 | 6 | 0 | 0.959548   | 4.001595  | -0.134097 |
| 32 | 1 | 0 | -0.345009  | 2.486946  | -0.911673 |
| 33 | 6 | 0 | 2.580276   | 3.252912  | 1.474008  |
| 34 | 1 | 0 | 2.560390   | 1.159717  | 1.956876  |
| 35 | 6 | 0 | 2.020564   | 4.287749  | 0.724775  |
| 36 | 1 | 0 | 3.408309   | 3.474480  | 2.138036  |
| 37 | 6 | 0 | 0.430252   | 0.272365  | 0.460725  |
| 38 | 1 | 0 | -0.351970  | 0.220212  | 1.222004  |
| 39 | 6 | 0 | -2.595719  | -0.242164 | -0.417535 |
| 40 | 1 | 0 | -2.496105  | 0.307904  | 0.526149  |
| 41 | 1 | 0 | -2.768668  | 0.502612  | -1.202149 |
| 42 | 6 | 0 | -3.786508  | -1.193259 | -0.331547 |
| 43 | 1 | 0 | -3.889307  | -1.729453 | -1.283003 |
| 44 | 1 | 0 | -3.594925  | -1.953176 | 0.435837  |
| 45 | 6 | 0 | -5.096314  | -0.475945 | -0.013195 |
| 46 | 1 | 0 | -5.272208  | 0.303509  | -0.764661 |
| 47 | 1 | 0 | -5.000727  | 0.037247  | 0.951556  |
| 48 | 6 | 0 | -6.300606  | -1.413605 | 0.030535  |
| 49 | 1 | 0 | -6.401266  | -1.918080 | -0.938385 |
| 50 | 1 | 0 | -6.122511  | -2.199935 | 0.774464  |
| 51 | 6 | 0 | -7.606098  | -0.694163 | 0.361166  |
| 52 | 1 | 0 | -7.779274  | 0.098329  | -0.377549 |
| 53 | 1 | 0 | -7.508629  | -0.196419 | 1.334063  |
| 54 | 6 | 0 | -8.817341  | -1.623663 | 0.392199  |
| 55 | 1 | 0 | -8.915594  | -2.119757 | -0.579894 |
| 56 | 1 | 0 | -8.646735  | -2.414893 | 1.130823  |
| 57 | 6 | 0 | -10.111392 | -0.885972 | 0.722994  |
| 58 | 1 | 0 | -10.317198 | -0.108886 | -0.018914 |
| 59 | 1 | 0 | -10.968094 | -1.563828 | 0.743502  |
| 60 | 1 | 0 | -10.043922 | -0.401830 | 1.701622  |
| 61 | 1 | 0 | 2.415770   | 5.290500  | 0.816537  |
| 62 | 8 | 0 | 0.335966   | 4.920135  | -0.910165 |
| 63 | 6 | 0 | 0.808560   | 6.258027  | -0.848924 |
| 64 | 1 | 0 | 1.852877   | 6.322758  | -1.168364 |
| 65 | 1 | 0 | 0.185968   | 6.829552  | -1.534336 |
| 66 | 1 | 0 | 0.706128   | 6.669415  | 0.159531  |

### Structure 43a (<sup>2</sup>E ec-ax H-bond O) (M06-2X, Gas Phase)

Energy (Hartrees): = - 1181.3341946  
 No imaginary frequencies

Standard orientation:

| Center Number | Atomic Number | Atomic Type | Coordinates (Angstroms) |           |           |
|---------------|---------------|-------------|-------------------------|-----------|-----------|
|               |               |             | X                       | Y         | Z         |
| 1             | 6             | 0           | -2.096912               | 0.358069  | 0.640612  |
| 2             | 6             | 0           | -2.355216               | -0.861976 | 0.016441  |
| 3             | 6             | 0           | -3.648329               | -1.206566 | -0.352320 |
| 4             | 6             | 0           | -4.673256               | -0.316326 | -0.074906 |
| 5             | 6             | 0           | -4.455548               | 0.895333  | 0.561766  |
| 6             | 6             | 0           | -3.155729               | 1.223220  | 0.918088  |
| 7             | 1             | 0           | -1.542764               | -1.556467 | -0.155956 |
| 8             | 1             | 0           | -3.875016               | -2.146267 | -0.836776 |
| 9             | 1             | 0           | -5.292542               | 1.547282  | 0.770052  |
| 10            | 1             | 0           | -2.963023               | 2.162687  | 1.425589  |
| 11            | 6             | 0           | -0.675925               | 0.784257  | 0.983295  |
| 12            | 1             | 0           | -0.692235               | 1.375180  | 1.905157  |
| 13            | 7             | 0           | 0.003387                | 1.542529  | -0.063044 |
| 14            | 8             | 0           | 0.146322                | -0.350978 | 1.168749  |
| 15            | 6             | 0           | 1.033713                | -0.498916 | 0.041730  |
| 16            | 6             | 0           | 0.540067                | 0.533813  | -0.965014 |
| 17            | 1             | 0           | 1.355160                | 0.939753  | -1.563639 |
| 18            | 1             | 0           | -0.227937               | 0.107245  | -1.630359 |
| 19            | 1             | 0           | 0.944961                | -1.530731 | -0.312168 |
| 20            | 6             | 0           | 2.454016                | -0.252194 | 0.539986  |

|    |   |   |           |           |           |
|----|---|---|-----------|-----------|-----------|
| 21 | 1 | 0 | 2.578477  | 0.822751  | 0.723358  |
| 22 | 6 | 0 | 3.522403  | -0.686229 | -0.467311 |
| 23 | 1 | 0 | 3.242505  | -1.665717 | -0.882170 |
| 24 | 6 | 0 | 4.876132  | -0.877502 | 0.239980  |
| 25 | 1 | 0 | 4.856103  | -1.858448 | 0.724971  |
| 26 | 6 | 0 | 6.051375  | -0.813507 | -0.727752 |
| 27 | 1 | 0 | 6.950937  | -1.197674 | -0.237512 |
| 28 | 1 | 0 | 5.853296  | -1.404457 | -1.623378 |
| 29 | 8 | 0 | 2.659789  | -0.991767 | 1.737269  |
| 30 | 1 | 0 | 1.850076  | -0.898814 | 2.252964  |
| 31 | 8 | 0 | 3.545139  | 0.246674  | -1.530803 |
| 32 | 1 | 0 | 4.422219  | 0.653364  | -1.571841 |
| 33 | 8 | 0 | 5.135971  | 0.138148  | 1.197755  |
| 34 | 1 | 0 | 4.514932  | -0.002439 | 1.921316  |
| 35 | 8 | 0 | 6.254493  | 0.529201  | -1.150692 |
| 36 | 1 | 0 | 6.330514  | 1.047169  | -0.340087 |
| 37 | 6 | 0 | -0.738448 | 2.611080  | -0.700251 |
| 38 | 1 | 0 | -1.102006 | 3.310188  | 0.056604  |
| 39 | 1 | 0 | -0.063323 | 3.154780  | -1.362599 |
| 40 | 1 | 0 | -1.597574 | 2.255582  | -1.289086 |
| 41 | 7 | 0 | -6.053806 | -0.680326 | -0.457281 |
| 42 | 8 | 0 | -6.932499 | 0.109763  | -0.193123 |
| 43 | 8 | 0 | -6.216700 | -1.744256 | -1.011433 |

-----

### Structure 43a ( ${}^2E$ ec-ax H-bond N) (M06-2X, Gas Phase)

Energy (Hartrees): = - 1181.3360066  
 No imaginary frequencies

Standard orientation:

| Center<br>Number | Atomic<br>Number | Atomic<br>Type | Coordinates (Angstroms) |           |           |
|------------------|------------------|----------------|-------------------------|-----------|-----------|
|                  |                  |                | X                       | Y         | Z         |
| 1                | 6                | 0              | 1.930089                | 0.277576  | -0.458919 |
| 2                | 6                | 0              | 2.251065                | -0.822836 | 0.335123  |
| 3                | 6                | 0              | 3.571917                | -1.224283 | 0.480873  |
| 4                | 6                | 0              | 4.555255                | -0.513754 | -0.188642 |
| 5                | 6                | 0              | 4.268302                | 0.567825  | -1.006462 |
| 6                | 6                | 0              | 2.942950                | 0.955137  | -1.137810 |
| 7                | 1                | 0              | 1.457513                | -1.381879 | 0.814992  |
| 8                | 1                | 0              | 3.849279                | -2.074576 | 1.088704  |
| 9                | 1                | 0              | 5.071628                | 1.075756  | -1.522054 |
| 10               | 1                | 0              | 2.692511                | 1.791320  | -1.782329 |
| 11               | 6                | 0              | 0.495249                | 0.768200  | -0.566458 |
| 12               | 1                | 0              | 0.330647                | 1.196081  | -1.561803 |
| 13               | 7                | 0              | 0.123725                | 1.778425  | 0.444269  |
| 14               | 8                | 0              | -0.400873               | -0.294646 | -0.350805 |
| 15               | 6                | 0              | -1.158955               | -0.072233 | 0.846149  |
| 16               | 6                | 0              | -0.350017               | 0.991891  | 1.581830  |
| 17               | 1                | 0              | -0.963471               | 1.608911  | 2.242151  |
| 18               | 1                | 0              | 0.475283                | 0.555769  | 2.164377  |
| 19               | 1                | 0              | -1.235492               | -1.018327 | 1.384600  |
| 20               | 6                | 0              | -2.569332               | 0.389018  | 0.494657  |
| 21               | 1                | 0              | -3.105820               | 0.567079  | 1.437613  |
| 22               | 6                | 0              | -3.325964               | -0.715055 | -0.243641 |
| 23               | 1                | 0              | -2.686756               | -1.089365 | -1.051527 |
| 24               | 6                | 0              | -4.609177               | -0.154377 | -0.887226 |
| 25               | 1                | 0              | -4.339347               | 0.243830  | -1.870479 |
| 26               | 6                | 0              | -5.689140               | -1.217764 | -1.045026 |
| 27               | 1                | 0              | -6.471615               | -0.850018 | -1.715836 |
| 28               | 1                | 0              | -5.272468               | -2.140264 | -1.451174 |
| 29               | 8                | 0              | -2.573418               | 1.563614  | -0.303979 |
| 30               | 1                | 0              | -1.737020               | 2.034941  | -0.156161 |
| 31               | 8                | 0              | -3.530055               | -1.779971 | 0.667073  |
| 32               | 1                | 0              | -4.470750               | -1.825244 | 0.886168  |
| 33               | 8                | 0              | -5.217842               | 0.864876  | -0.102551 |
| 34               | 1                | 0              | -4.613328               | 1.616663  | -0.107856 |
| 35               | 8                | 0              | -6.238140               | -1.531925 | 0.228844  |
| 36               | 1                | 0              | -6.493420               | -0.684569 | 0.613035  |
| 37               | 6                | 0              | 1.113430                | 2.793777  | 0.760858  |
| 38               | 1                | 0              | 1.410153                | 3.316152  | -0.150689 |
| 39               | 1                | 0              | 0.662128                | 3.521963  | 1.436225  |
| 40               | 1                | 0              | 2.012650                | 2.378870  | 1.236129  |
| 41               | 7                | 0              | 5.964629                | -0.934520 | -0.038009 |
| 42               | 8                | 0              | 6.803142                | -0.295949 | -0.633844 |
| 43               | 8                | 0              | 6.189082                | -1.887144 | 0.674047  |

-----

### Structure 43a ( ${}^2E$ ec-ec) (M06-2X, Gas Phase)

Energy (Hartrees): = - 1181.3363164  
 No imaginary frequencies

Standard orientation:

| Center<br>Number | Atomic<br>Number | Atomic<br>Type | Coordinates (Angstroms) |           |           |
|------------------|------------------|----------------|-------------------------|-----------|-----------|
|                  |                  |                | X                       | Y         | Z         |
| 1                | 6                | 0              | -2.166096               | 0.249565  | 0.349086  |
| 2                | 6                | 0              | -2.687359               | 0.100210  | -0.936522 |
| 3                | 6                | 0              | -4.026204               | -0.204334 | -1.114891 |
| 4                | 6                | 0              | -4.823276               | -0.354666 | 0.012764  |
| 5                | 6                | 0              | -4.335118               | -0.212438 | 1.299579  |
| 6                | 6                | 0              | -2.987655               | 0.092046  | 1.458680  |
| 7                | 1                | 0              | -2.029059               | 0.239668  | -1.785086 |
| 8                | 1                | 0              | -4.464151               | -0.325550 | -2.096082 |
| 9                | 1                | 0              | -5.001467               | -0.339487 | 2.141216  |
| 10               | 1                | 0              | -2.575295               | 0.208102  | 2.454812  |
| 11               | 6                | 0              | -0.703874               | 0.582597  | 0.508017  |
| 12               | 1                | 0              | -0.465245               | 0.712223  | 1.582417  |
| 13               | 7                | 0              | -0.314673               | 1.749765  | -0.261097 |
| 14               | 8                | 0              | 0.092773                | -0.462182 | -0.021358 |
| 15               | 6                | 0              | 1.266174                | 0.112228  | -0.624697 |
| 16               | 6                | 0              | 1.132856                | 1.609741  | -0.363248 |
| 17               | 1                | 0              | 1.643243                | 1.885206  | 0.573711  |
| 18               | 1                | 0              | 1.544595                | 2.219383  | -1.166743 |
| 19               | 1                | 0              | 1.229192                | -0.118492 | -1.694523 |
| 20               | 6                | 0              | 2.476922                | -0.560481 | -0.005126 |
| 21               | 1                | 0              | 2.548852                | -0.258772 | 1.048784  |
| 22               | 6                | 0              | 3.778670                | -0.160412 | -0.694595 |
| 23               | 1                | 0              | 3.643289                | -0.250117 | -1.781259 |
| 24               | 6                | 0              | 4.915190                | -1.125196 | -0.301781 |
| 25               | 1                | 0              | 4.854939                | -1.993949 | -0.965016 |
| 26               | 6                | 0              | 6.290285                | -0.481739 | -0.429097 |
| 27               | 1                | 0              | 7.062880                | -1.254454 | -0.374579 |
| 28               | 1                | 0              | 6.385732                | 0.054242  | -1.374418 |
| 29               | 8                | 0              | 2.340903                | -1.971924 | -0.103852 |
| 30               | 1                | 0              | 1.429718                | -2.178362 | 0.135224  |
| 31               | 8                | 0              | 4.027191                | 1.202522  | -0.407133 |
| 32               | 1                | 0              | 4.820449                | 1.265671  | 0.143825  |
| 33               | 8                | 0              | 4.832059                | -1.540991 | 1.054310  |
| 34               | 1                | 0              | 4.047883                | -2.097758 | 1.123957  |
| 35               | 8                | 0              | 6.469909                | 0.471007  | 0.611645  |
| 36               | 1                | 0              | 6.287139                | -0.003403 | 1.431697  |
| 37               | 6                | 0              | -0.751914               | 3.000811  | 0.328620  |
| 38               | 1                | 0              | -0.336495               | 3.152123  | 1.338948  |
| 39               | 1                | 0              | -0.433247               | 3.829524  | -0.304290 |
| 40               | 1                | 0              | -1.841849               | 3.017654  | 0.389967  |
| 41               | 7                | 0              | -6.255570               | -0.676052 | -0.168991 |
| 42               | 8                | 0              | -6.931144               | -0.798580 | 0.828324  |
| 43               | 8                | 0              | -6.660566               | -0.795733 | -1.303522 |

### Structure 43a (E<sub>2</sub> ax-ax) (M06-2X, Gas Phase)

Energy (Hartrees): = - 1181.3371761  
 No imaginary frequencies

Standard orientation:

| Center<br>Number | Atomic<br>Number | Atomic<br>Type | Coordinates (Angstroms) |           |           |
|------------------|------------------|----------------|-------------------------|-----------|-----------|
|                  |                  |                | X                       | Y         | Z         |
| 1                | 6                | 0              | -2.119108               | 0.806531  | 0.477370  |
| 2                | 6                | 0              | -2.459962               | -0.364827 | 1.151674  |
| 3                | 6                | 0              | -3.643618               | -1.027083 | 0.857089  |
| 4                | 6                | 0              | -4.470205               | -0.494075 | -0.118829 |
| 5                | 6                | 0              | -4.157479               | 0.667817  | -0.807383 |
| 6                | 6                | 0              | -2.970163               | 1.317969  | -0.501747 |
| 7                | 1                | 0              | -1.785783               | -0.758278 | 1.902003  |
| 8                | 1                | 0              | -3.931505               | -1.938629 | 1.362059  |
| 9                | 1                | 0              | -4.835377               | 1.037955  | -1.564113 |
| 10               | 1                | 0              | -2.679853               | 2.216819  | -1.031333 |
| 11               | 6                | 0              | -0.833838               | 1.540528  | 0.833979  |
| 12               | 1                | 0              | -1.030603               | 2.284918  | 1.609147  |
| 13               | 7                | 0              | -0.227603               | 2.149304  | -0.324537 |
| 14               | 8                | 0              | 0.131954                | 0.626833  | 1.358988  |
| 15               | 6                | 0              | 0.808014                | 0.057991  | 0.227753  |
| 16               | 6                | 0              | 0.458666                | 1.007844  | -0.951225 |
| 17               | 1                | 0              | 1.343576                | 1.328523  | -1.497260 |
| 18               | 1                | 0              | -0.221216               | 0.510131  | -1.644508 |
| 19               | 1                | 0              | 0.416538                | -0.952134 | 0.058174  |
| 20               | 6                | 0              | 2.279346                | -0.037996 | 0.598909  |
| 21               | 1                | 0              | 2.709407                | 0.971367  | 0.643127  |
| 22               | 6                | 0              | 3.098308                | -0.833002 | -0.420592 |
| 23               | 1                | 0              | 2.538579                | -1.737078 | -0.701550 |
| 24               | 6                | 0              | 4.417474                | -1.308170 | 0.212495  |
| 25               | 1                | 0              | 4.186404                | -2.187757 | 0.821357  |
| 26               | 6                | 0              | 5.466196                | -1.676238 | -0.828482 |
| 27               | 1                | 0              | 6.283932                | -2.219983 | -0.346296 |
| 28               | 1                | 0              | 5.036879                | -2.301987 | -1.612792 |
| 29               | 8                | 0              | 2.404444                | -0.682155 | 1.861340  |

|    |   |   |           |           |           |
|----|---|---|-----------|-----------|-----------|
| 30 | 1 | 0 | 1.722053  | -0.305716 | 2.428661  |
| 31 | 8 | 0 | 3.252430  | -0.027208 | -1.573008 |
| 32 | 1 | 0 | 4.195152  | 0.058173  | -1.773923 |
| 33 | 8 | 0 | 5.026553  | -0.303512 | 1.010408  |
| 34 | 1 | 0 | 4.470293  | -0.199744 | 1.790629  |
| 35 | 8 | 0 | 5.958263  | -0.498874 | -1.456854 |
| 36 | 1 | 0 | 6.245178  | 0.078735  | -0.738982 |
| 37 | 6 | 0 | 0.694928  | 3.223337  | 0.049195  |
| 38 | 1 | 0 | 1.191875  | 3.590571  | -0.848434 |
| 39 | 1 | 0 | 0.127150  | 4.048056  | 0.483192  |
| 40 | 1 | 0 | 1.458429  | 2.903043  | 0.770483  |
| 41 | 7 | 0 | -5.731354 | -1.193385 | -0.442347 |
| 42 | 8 | 0 | -6.434557 | -0.708906 | -1.300791 |
| 43 | 8 | 0 | -5.981558 | -2.206448 | 0.172081  |

-----

**Structure 43a (<sup>2</sup>E ec-ax H-bond O) (M06-2X, Benzene)**

Energy (Hartrees): = - 1181.3551202  
 No imaginary frequencies

Standard orientation:

| Center<br>Number | Atomic<br>Number | Atomic<br>Type | Coordinates (Angstroms) |           |           |
|------------------|------------------|----------------|-------------------------|-----------|-----------|
|                  |                  |                | X                       | Y         | Z         |
| 1                | 6                | 0              | -2.100761               | 0.376710  | 0.651537  |
| 2                | 6                | 0              | -2.348026               | -0.869007 | 0.074734  |
| 3                | 6                | 0              | -3.634644               | -1.231596 | -0.299464 |
| 4                | 6                | 0              | -4.664386               | -0.330484 | -0.078562 |
| 5                | 6                | 0              | -4.457908               | 0.907113  | 0.512376  |
| 6                | 6                | 0              | -3.164834               | 1.251685  | 0.876314  |
| 7                | 1                | 0              | -1.533732               | -1.569445 | -0.061856 |
| 8                | 1                | 0              | -3.845609               | -2.192545 | -0.748499 |
| 9                | 1                | 0              | -5.294669               | 1.570505  | 0.682260  |
| 10               | 1                | 0              | -2.982948               | 2.211585  | 1.348290  |
| 11               | 6                | 0              | -0.684746               | 0.822063  | 0.993567  |
| 12               | 1                | 0              | -0.710341               | 1.430921  | 1.902718  |
| 13               | 7                | 0              | -0.007804               | 1.562055  | -0.067932 |
| 14               | 8                | 0              | 0.148178                | -0.302040 | 1.204626  |
| 15               | 6                | 0              | 1.024308                | -0.478075 | 0.071574  |
| 16               | 6                | 0              | 0.524788                | 0.535079  | -0.951806 |
| 17               | 1                | 0              | 1.334590                | 0.931897  | -1.563210 |
| 18               | 1                | 0              | -0.246512               | 0.095653  | -1.604009 |
| 19               | 1                | 0              | 0.928399                | -1.516058 | -0.261338 |
| 20               | 6                | 0              | 2.450550                | -0.227489 | 0.552112  |
| 21               | 1                | 0              | 2.580136                | 0.848889  | 0.723860  |
| 22               | 6                | 0              | 3.508934                | -0.676492 | -0.460869 |
| 23               | 1                | 0              | 3.213876                | -1.650665 | -0.876562 |
| 24               | 6                | 0              | 4.864787                | -0.886586 | 0.235454  |
| 25               | 1                | 0              | 4.831483                | -1.862069 | 0.729937  |
| 26               | 6                | 0              | 6.033788                | -0.862510 | -0.740146 |
| 27               | 1                | 0              | 6.929222                | -1.254128 | -0.248049 |
| 28               | 1                | 0              | 5.822045                | -1.469866 | -1.621776 |
| 29               | 8                | 0              | 2.665716                | -0.953555 | 1.757361  |
| 30               | 1                | 0              | 1.870261                | -0.830621 | 2.289355  |
| 31               | 8                | 0              | 3.541675                | 0.261407  | -1.522907 |
| 32               | 1                | 0              | 4.431800                | 0.636961  | -1.575285 |
| 33               | 8                | 0              | 5.152803                | 0.135506  | 1.180169  |
| 34               | 1                | 0              | 4.528880                | 0.018941  | 1.906122  |
| 35               | 8                | 0              | 6.264541                | 0.468493  | -1.193502 |
| 36               | 1                | 0              | 6.368913                | 1.000970  | -0.395142 |
| 37               | 6                | 0              | -0.747770               | 2.619594  | -0.725758 |
| 38               | 1                | 0              | -1.114379               | 3.332845  | 0.016399  |
| 39               | 1                | 0              | -0.070502               | 3.152213  | -1.395830 |
| 40               | 1                | 0              | -1.603189               | 2.254921  | -1.314257 |
| 41               | 7                | 0              | -6.035593               | -0.710432 | -0.467261 |
| 42               | 8                | 0              | -6.927186               | 0.074266  | -0.225355 |
| 43               | 8                | 0              | -6.190530               | -1.784363 | -1.007037 |

-----

**Structure 43a (<sup>2</sup>E ec-ax H-bond N) (M06-2X, Benzene)**

Energy (Hartrees): = - 1181.3580938  
 No imaginary frequencies

Standard orientation:

| Center<br>Number | Atomic<br>Number | Atomic<br>Type | Coordinates (Angstroms) |           |           |
|------------------|------------------|----------------|-------------------------|-----------|-----------|
|                  |                  |                | X                       | Y         | Z         |
| 1                | 6                | 0              | 1.932819                | 0.281333  | -0.455076 |
| 2                | 6                | 0              | 2.250197                | -0.822746 | 0.335717  |
| 3                | 6                | 0              | 3.569558                | -1.228463 | 0.481387  |
| 4                | 6                | 0              | 4.555843                | -0.517484 | -0.184621 |
| 5                | 6                | 0              | 4.272651                | 0.572052  | -0.994532 |
| 6                | 6                | 0              | 2.948781                | 0.962966  | -1.126334 |

|    |   |   |           |           |           |
|----|---|---|-----------|-----------|-----------|
| 7  | 1 | 0 | 1.457553  | -1.380794 | 0.818386  |
| 8  | 1 | 0 | 3.837744  | -2.082853 | 1.087771  |
| 9  | 1 | 0 | 5.073987  | 1.086290  | -1.507130 |
| 10 | 1 | 0 | 2.701469  | 1.804562  | -1.764777 |
| 11 | 6 | 0 | 0.498143  | 0.772541  | -0.573471 |
| 12 | 1 | 0 | 0.342133  | 1.192478  | -1.573048 |
| 13 | 7 | 0 | 0.117493  | 1.786033  | 0.426850  |
| 14 | 8 | 0 | -0.401553 | -0.289428 | -0.356221 |
| 15 | 6 | 0 | -1.145592 | -0.070300 | 0.852016  |
| 16 | 6 | 0 | -0.339390 | 1.004837  | 1.575097  |
| 17 | 1 | 0 | -0.952966 | 1.621575  | 2.235276  |
| 18 | 1 | 0 | 0.492910  | 0.579177  | 2.154260  |
| 19 | 1 | 0 | -1.203148 | -1.013874 | 1.397051  |
| 20 | 6 | 0 | -2.563578 | 0.380332  | 0.514653  |
| 21 | 1 | 0 | -3.091873 | 0.548668  | 1.463669  |
| 22 | 6 | 0 | -3.322846 | -0.718849 | -0.230165 |
| 23 | 1 | 0 | -2.684808 | -1.096011 | -1.037414 |
| 24 | 6 | 0 | -4.600804 | -0.152884 | -0.878508 |
| 25 | 1 | 0 | -4.323120 | 0.256386  | -1.854737 |
| 26 | 6 | 0 | -5.678658 | -1.212177 | -1.065623 |
| 27 | 1 | 0 | -6.454675 | -0.831358 | -1.736853 |
| 28 | 1 | 0 | -5.260861 | -2.125965 | -1.490233 |
| 29 | 8 | 0 | -2.578486 | 1.564940  | -0.271240 |
| 30 | 1 | 0 | -1.728359 | 2.021504  | -0.143799 |
| 31 | 8 | 0 | -3.540736 | -1.787446 | 0.677260  |
| 32 | 1 | 0 | -4.485618 | -1.830001 | 0.877283  |
| 33 | 8 | 0 | -5.217978 | 0.856829  | -0.086072 |
| 34 | 1 | 0 | -4.608252 | 1.604722  | -0.069946 |
| 35 | 8 | 0 | -6.244304 | -1.554121 | 0.196655  |
| 36 | 1 | 0 | -6.510837 | -0.715654 | 0.593465  |
| 37 | 6 | 0 | 1.085954  | 2.827555  | 0.721480  |
| 38 | 1 | 0 | 1.364614  | 3.343271  | -0.199842 |
| 39 | 1 | 0 | 0.622617  | 3.556196  | 1.388767  |
| 40 | 1 | 0 | 1.996866  | 2.442504  | 1.199553  |
| 41 | 7 | 0 | 5.960978  | -0.943729 | -0.037335 |
| 42 | 8 | 0 | 6.806446  | -0.306056 | -0.626828 |
| 43 | 8 | 0 | 6.187467  | -1.903371 | 0.666892  |

### Structure 43a (<sup>2</sup>E ec-ec) (M06-2X, Benzene)

Energy (Hartrees): = - 1181.3576021  
 No imaginary frequencies

Standard orientation:

| Center<br>Number | Atomic<br>Number | Atomic<br>Type | Coordinates (Angstroms) |           |           |
|------------------|------------------|----------------|-------------------------|-----------|-----------|
|                  |                  |                | X                       | Y         | Z         |
| 1                | 6                | 0              | -2.171572               | 0.245631  | 0.345079  |
| 2                | 6                | 0              | -2.671896               | -0.030854 | -0.927966 |
| 3                | 6                | 0              | -4.010683               | -0.337960 | -1.100180 |
| 4                | 6                | 0              | -4.831204               | -0.358811 | 0.021629  |
| 5                | 6                | 0              | -4.363906               | -0.089860 | 1.296227  |
| 6                | 6                | 0              | -3.015413               | 0.212595  | 1.449561  |
| 7                | 1                | 0              | -2.001578               | 0.007493  | -1.777909 |
| 8                | 1                | 0              | -4.426206               | -0.554948 | -2.074608 |
| 9                | 1                | 0              | -5.042261               | -0.117369 | 2.137574  |
| 10               | 1                | 0              | -2.620999               | 0.425596  | 2.436962  |
| 11               | 6                | 0              | -0.711668               | 0.595939  | 0.495733  |
| 12               | 1                | 0              | -0.480014               | 0.780710  | 1.562131  |
| 13               | 7                | 0              | -0.329250               | 1.727781  | -0.329771 |
| 14               | 8                | 0              | 0.095250                | -0.467267 | 0.019461  |
| 15               | 6                | 0              | 1.263778                | 0.085954  | -0.614930 |
| 16               | 6                | 0              | 1.119991                | 1.592907  | -0.423728 |
| 17               | 1                | 0              | 1.626441                | 1.916890  | 0.499350  |
| 18               | 1                | 0              | 1.523923                | 2.166701  | -1.257451 |
| 19               | 1                | 0              | 1.225711                | -0.193577 | -1.673048 |
| 20               | 6                | 0              | 2.480657                | -0.550250 | 0.031913  |
| 21               | 1                | 0              | 2.547755                | -0.206192 | 1.072785  |
| 22               | 6                | 0              | 3.782230                | -0.170011 | -0.671452 |
| 23               | 1                | 0              | 3.645488                | -0.283178 | -1.755530 |
| 24               | 6                | 0              | 4.918245                | -1.125748 | -0.260232 |
| 25               | 1                | 0              | 4.840731                | -2.019839 | -0.886632 |
| 26               | 6                | 0              | 6.296714                | -0.505964 | -0.442738 |
| 27               | 1                | 0              | 7.061406                | -1.285158 | -0.369284 |
| 28               | 1                | 0              | 6.382494                | -0.018278 | -1.415064 |
| 29               | 8                | 0              | 2.354513                | -1.966879 | -0.009899 |
| 30               | 1                | 0              | 1.452095                | -2.170978 | 0.262873  |
| 31               | 8                | 0              | 4.037784                | 1.199088  | -0.410135 |
| 32               | 1                | 0              | 4.850862                | 1.266452  | 0.110115  |
| 33               | 8                | 0              | 4.855976                | -1.484242 | 1.114676  |
| 34               | 1                | 0              | 4.066667                | -2.028320 | 1.219357  |
| 35               | 8                | 0              | 6.515517                | 0.493209  | 0.549234  |
| 36               | 1                | 0              | 6.353661                | 0.059050  | 1.396035  |
| 37               | 6                | 0              | -0.773601               | 3.004573  | 0.196711  |
| 38               | 1                | 0              | -0.372103               | 3.203033  | 1.204247  |

|    |   |   |           |           |           |
|----|---|---|-----------|-----------|-----------|
| 39 | 1 | 0 | -0.445756 | 3.803847  | -0.469361 |
| 40 | 1 | 0 | -1.864456 | 3.027971  | 0.242493  |
| 41 | 7 | 0 | -6.262211 | -0.675606 | -0.154630 |
| 42 | 8 | 0 | -6.970243 | -0.651125 | 0.828668  |
| 43 | 8 | 0 | -6.645506 | -0.942032 | -1.273004 |

### Structure 43a (E<sub>2</sub> ax-ax) (M06-2X, Benzene)

Energy (Hartrees): = - 1181.3579028

No imaginary frequencies

Standard orientation:

| Center<br>Number | Atomic<br>Number | Atomic<br>Type | Coordinates (Angstroms) |           |           |
|------------------|------------------|----------------|-------------------------|-----------|-----------|
|                  |                  |                | X                       | Y         | Z         |
| 1                | 6                | 0              | -2.122871               | 0.796015  | 0.482199  |
| 2                | 6                | 0              | -2.461543               | -0.388448 | 1.135083  |
| 3                | 6                | 0              | -3.648544               | -1.042740 | 0.837254  |
| 4                | 6                | 0              | -4.483306               | -0.487269 | -0.119899 |
| 5                | 6                | 0              | -4.174481               | 0.689510  | -0.785743 |
| 6                | 6                | 0              | -2.982964               | 1.330169  | -0.477472 |
| 7                | 1                | 0              | -1.784102               | -0.800802 | 1.872227  |
| 8                | 1                | 0              | -3.927585               | -1.964529 | 1.328546  |
| 9                | 1                | 0              | -4.855224               | 1.082178  | -1.528611 |
| 10               | 1                | 0              | -2.700626               | 2.240294  | -0.992027 |
| 11               | 6                | 0              | -0.830987               | 1.518485  | 0.842051  |
| 12               | 1                | 0              | -1.022437               | 2.254375  | 1.626203  |
| 13               | 7                | 0              | -0.224546               | 2.139275  | -0.310010 |
| 14               | 8                | 0              | 0.130942                | 0.592258  | 1.351687  |
| 15               | 6                | 0              | 0.811917                | 0.040705  | 0.213954  |
| 16               | 6                | 0              | 0.464431                | 1.007466  | -0.950765 |
| 17               | 1                | 0              | 1.350221                | 1.340915  | -1.487572 |
| 18               | 1                | 0              | -0.210166               | 0.518242  | -1.655429 |
| 19               | 1                | 0              | 0.424263                | -0.967642 | 0.027493  |
| 20               | 6                | 0              | 2.282906                | -0.054150 | 0.590280  |
| 21               | 1                | 0              | 2.706563                | 0.957515  | 0.642243  |
| 22               | 6                | 0              | 3.110615                | -0.849037 | -0.422554 |
| 23               | 1                | 0              | 2.562317                | -1.762347 | -0.691739 |
| 24               | 6                | 0              | 4.439905                | -1.298880 | 0.210699  |
| 25               | 1                | 0              | 4.230161                | -2.188409 | 0.812376  |
| 26               | 6                | 0              | 5.498952                | -1.639012 | -0.828219 |
| 27               | 1                | 0              | 6.327477                | -2.167569 | -0.347148 |
| 28               | 1                | 0              | 5.087411                | -2.272991 | -1.615386 |
| 29               | 8                | 0              | 2.403765                | -0.703291 | 1.851974  |
| 30               | 1                | 0              | 1.726731                | -0.319929 | 2.421817  |
| 31               | 8                | 0              | 3.254469                | -0.061010 | -1.591289 |
| 32               | 1                | 0              | 4.197738                | 0.075991  | -1.757989 |
| 33               | 8                | 0              | 5.026184                | -0.285265 | 1.017418  |
| 34               | 1                | 0              | 4.457613                | -0.190090 | 1.790185  |
| 35               | 8                | 0              | 5.970780                | -0.447776 | -1.452107 |
| 36               | 1                | 0              | 6.254827                | 0.129351  | -0.732244 |
| 37               | 6                | 0              | 0.693122                | 3.214247  | 0.073056  |
| 38               | 1                | 0              | 1.183885                | 3.596846  | -0.822192 |
| 39               | 1                | 0              | 0.123133                | 4.030923  | 0.520023  |
| 40               | 1                | 0              | 1.463434                | 2.892196  | 0.786548  |
| 41               | 7                | 0              | -5.746642               | -1.175476 | -0.446152 |
| 42               | 8                | 0              | -6.470925               | -0.662738 | -1.271756 |
| 43               | 8                | 0              | -5.987743               | -2.213862 | 0.131109  |

### Structure 43a (<sup>2</sup>E ec-ax H-bond O) (M06-2X, DMSO)

Energy (Hartrees): = - 1181.3590239

No imaginary frequencies

Standard orientation:

| Center<br>Number | Atomic<br>Number | Atomic<br>Type | Coordinates (Angstroms) |           |           |
|------------------|------------------|----------------|-------------------------|-----------|-----------|
|                  |                  |                | X                       | Y         | Z         |
| 1                | 6                | 0              | -2.104719               | 0.398092  | 0.621136  |
| 2                | 6                | 0              | -2.336315               | -0.832452 | 0.004419  |
| 3                | 6                | 0              | -3.623684               | -1.211657 | -0.349708 |
| 4                | 6                | 0              | -4.667996               | -0.343418 | -0.067143 |
| 5                | 6                | 0              | -4.474849               | 0.880079  | 0.558002  |
| 6                | 6                | 0              | -3.180588               | 1.242208  | 0.900522  |
| 7                | 1                | 0              | -1.512021               | -1.508818 | -0.186568 |
| 8                | 1                | 0              | -3.817832               | -2.162006 | -0.828349 |
| 9                | 1                | 0              | -5.317399               | 1.522924  | 0.773605  |
| 10               | 1                | 0              | -3.004371               | 2.190677  | 1.396930  |
| 11               | 6                | 0              | -0.694328               | 0.862419  | 0.956077  |
| 12               | 1                | 0              | -0.731382               | 1.492088  | 1.849518  |
| 13               | 7                | 0              | -0.019792               | 1.585134  | -0.122008 |
| 14               | 8                | 0              | 0.146365                | -0.250695 | 1.197323  |

|    |   |   |           |           |           |
|----|---|---|-----------|-----------|-----------|
| 15 | 6 | 0 | 1.025387  | -0.452009 | 0.070342  |
| 16 | 6 | 0 | 0.530717  | 0.539427  | -0.976104 |
| 17 | 1 | 0 | 1.342935  | 0.930602  | -1.588342 |
| 18 | 1 | 0 | -0.229354 | 0.082854  | -1.628222 |
| 19 | 1 | 0 | 0.930213  | -1.494769 | -0.245591 |
| 20 | 6 | 0 | 2.448857  | -0.194055 | 0.554731  |
| 21 | 1 | 0 | 2.579276  | 0.884088  | 0.715683  |
| 22 | 6 | 0 | 3.514838  | -0.652907 | -0.446402 |
| 23 | 1 | 0 | 3.210674  | -1.615602 | -0.879954 |
| 24 | 6 | 0 | 4.855016  | -0.892873 | 0.265540  |
| 25 | 1 | 0 | 4.786048  | -1.858491 | 0.774626  |
| 26 | 6 | 0 | 6.034183  | -0.932927 | -0.694746 |
| 27 | 1 | 0 | 6.909975  | -1.338127 | -0.179565 |
| 28 | 1 | 0 | 5.812829  | -1.561548 | -1.558677 |
| 29 | 8 | 0 | 2.655096  | -0.901290 | 1.773819  |
| 30 | 1 | 0 | 1.864797  | -0.746208 | 2.306292  |
| 31 | 8 | 0 | 3.583783  | 0.307785  | -1.491436 |
| 32 | 1 | 0 | 4.500337  | 0.609074  | -1.562305 |
| 33 | 8 | 0 | 5.164826  | 0.138880  | 1.195740  |
| 34 | 1 | 0 | 4.520620  | 0.059674  | 1.909628  |
| 35 | 8 | 0 | 6.318056  | 0.377811  | -1.186621 |
| 36 | 1 | 0 | 6.440078  | 0.928953  | -0.402838 |
| 37 | 6 | 0 | -0.795161 | 2.595383  | -0.818805 |
| 38 | 1 | 0 | -1.191711 | 3.317070  | -0.100772 |
| 39 | 1 | 0 | -0.136179 | 3.126941  | -1.508052 |
| 40 | 1 | 0 | -1.633595 | 2.176235  | -1.395063 |
| 41 | 7 | 0 | -6.037401 | -0.742603 | -0.431750 |
| 42 | 8 | 0 | -6.939165 | 0.032770  | -0.189099 |
| 43 | 8 | 0 | -6.192929 | -1.825910 | -0.956329 |

-----

**Structure 43a ( $^2E$  ec-ax H-bond N) (M06-2X, DMSO)**

Energy (Hartrees): = - 1181.362582

No imaginary frequencies

Standard orientation:

| Center Number | Atomic Number | Atomic Type | Coordinates (Angstroms) |           |           |
|---------------|---------------|-------------|-------------------------|-----------|-----------|
|               |               |             | X                       | Y         | Z         |
| 1             | 6             | 0           | 1.933026                | 0.275164  | -0.456036 |
| 2             | 6             | 0           | 2.258337                | -0.805392 | 0.364469  |
| 3             | 6             | 0           | 3.579435                | -1.205133 | 0.509860  |
| 4             | 6             | 0           | 4.558688                | -0.510656 | -0.185055 |
| 5             | 6             | 0           | 4.267376                | 0.557378  | -1.021548 |
| 6             | 6             | 0           | 2.941675                | 0.942811  | -1.152468 |
| 7             | 1             | 0           | 1.475421                | -1.348793 | 0.879344  |
| 8             | 1             | 0           | 3.847864                | -2.041342 | 1.141048  |
| 9             | 1             | 0           | 5.058907                | 1.065230  | -1.555628 |
| 10            | 1             | 0           | 2.686514                | 1.770119  | -1.806108 |
| 11            | 6             | 0           | 0.499269                | 0.764695  | -0.579494 |
| 12            | 1             | 0           | 0.350057                | 1.185307  | -1.578870 |
| 13            | 7             | 0           | 0.116285                | 1.774243  | 0.421643  |
| 14            | 8             | 0           | -0.403887               | -0.300192 | -0.366623 |
| 15            | 6             | 0           | -1.136209               | -0.087859 | 0.852154  |
| 16            | 6             | 0           | -0.329542               | 0.987941  | 1.572129  |
| 17            | 1             | 0           | -0.940528               | 1.600925  | 2.237772  |
| 18            | 1             | 0           | 0.508266                | 0.563683  | 2.142749  |
| 19            | 1             | 0           | -1.181523               | -1.031276 | 1.398113  |
| 20            | 6             | 0           | -2.557483               | 0.364970  | 0.531078  |
| 21            | 1             | 0           | -3.074435               | 0.522483  | 1.487778  |
| 22            | 6             | 0           | -3.329948               | -0.715870 | -0.226859 |
| 23            | 1             | 0           | -2.701568               | -1.089821 | -1.042832 |
| 24            | 6             | 0           | -4.602313               | -0.129458 | -0.865830 |
| 25            | 1             | 0           | -4.318204               | 0.300942  | -1.830549 |
| 26            | 6             | 0           | -5.683586               | -1.176178 | -1.090811 |
| 27            | 1             | 0           | -6.453800               | -0.770321 | -1.753492 |
| 28            | 1             | 0           | -5.267646               | -2.076486 | -1.544754 |
| 29            | 8             | 0           | -2.573996               | 1.563659  | -0.235905 |
| 30            | 1             | 0           | -1.711055               | 2.003119  | -0.116519 |
| 31            | 8             | 0           | -3.564424               | -1.797673 | 0.665628  |
| 32            | 1             | 0           | -4.512980               | -1.830683 | 0.849020  |
| 33            | 8             | 0           | -5.218242               | 0.864578  | -0.050659 |
| 34            | 1             | 0           | -4.594567               | 1.599903  | -0.000983 |
| 35            | 8             | 0           | -6.261149               | -1.557743 | 0.158540  |
| 36            | 1             | 0           | -6.531761               | -0.731479 | 0.578993  |
| 37            | 6             | 0           | 1.089320                | 2.813233  | 0.716503  |
| 38            | 1             | 0           | 1.385648                | 3.311853  | -0.208613 |
| 39            | 1             | 0           | 0.622858                | 3.550914  | 1.371482  |
| 40            | 1             | 0           | 1.988205                | 2.422427  | 1.212512  |
| 41            | 7             | 0           | 5.962117                | -0.932093 | -0.039113 |
| 42            | 8             | 0           | 6.806819                | -0.318705 | -0.658067 |
| 43            | 8             | 0           | 6.200782                | -1.869629 | 0.693746  |

-----

**Structure 43a ( $^2E$  ec-ec) (M06-2X, DMSO)**

Energy (Hartrees): = - 1181.3609027  
No imaginary frequencies

Standard orientation:

| Center<br>Number | Atomic<br>Number | Atomic<br>Type | Coordinates (Angstroms) |           |           |
|------------------|------------------|----------------|-------------------------|-----------|-----------|
|                  |                  |                | X                       | Y         | Z         |
| 1                | 6                | 0              | -2.174476               | 0.244584  | 0.331875  |
| 2                | 6                | 0              | -2.648684               | -0.234634 | -0.890556 |
| 3                | 6                | 0              | -3.989386               | -0.542155 | -1.047369 |
| 4                | 6                | 0              | -4.837486               | -0.356572 | 0.038479  |
| 5                | 6                | 0              | -4.396771               | 0.118175  | 1.262906  |
| 6                | 6                | 0              | -3.046056               | 0.417537  | 1.401742  |
| 7                | 1                | 0              | -1.958854               | -0.359963 | -1.716584 |
| 8                | 1                | 0              | -4.378226               | -0.915025 | -1.985173 |
| 9                | 1                | 0              | -5.091437               | 0.248337  | 2.081362  |
| 10               | 1                | 0              | -2.671175               | 0.790243  | 2.348623  |
| 11               | 6                | 0              | -0.715675               | 0.604828  | 0.460308  |
| 12               | 1                | 0              | -0.482193               | 0.854644  | 1.510519  |
| 13               | 7                | 0              | -0.344518               | 1.691942  | -0.433352 |
| 14               | 8                | 0              | 0.093915                | -0.479964 | 0.039171  |
| 15               | 6                | 0              | 1.265108                | 0.046088  | -0.615273 |
| 16               | 6                | 0              | 1.108243                | 1.559891  | -0.510452 |
| 17               | 1                | 0              | 1.598693                | 1.938276  | 0.399648  |
| 18               | 1                | 0              | 1.511278                | 2.089209  | -1.373687 |
| 19               | 1                | 0              | 1.240416                | -0.292664 | -1.656031 |
| 20               | 6                | 0              | 2.484241                | -0.539827 | 0.073165  |
| 21               | 1                | 0              | 2.542901                | -0.139753 | 1.094021  |
| 22               | 6                | 0              | 3.784791                | -0.189059 | -0.649140 |
| 23               | 1                | 0              | 3.646836                | -0.344047 | -1.727106 |
| 24               | 6                | 0              | 4.924415                | -1.123318 | -0.204424 |
| 25               | 1                | 0              | 4.843151                | -2.044887 | -0.788387 |
| 26               | 6                | 0              | 6.300724                | -0.517139 | -0.434533 |
| 27               | 1                | 0              | 7.064239                | -1.294056 | -0.335750 |
| 28               | 1                | 0              | 6.372770                | -0.079827 | -1.431337 |
| 29               | 8                | 0              | 2.368901                | -1.959281 | 0.110700  |
| 30               | 1                | 0              | 1.477342                | -2.152359 | 0.425468  |
| 31               | 8                | 0              | 4.046302                | 1.191586  | -0.442063 |
| 32               | 1                | 0              | 4.858409                | 1.267328  | 0.078067  |
| 33               | 8                | 0              | 4.876161                | -1.417192 | 1.188016  |
| 34               | 1                | 0              | 4.075897                | -1.937915 | 1.326856  |
| 35               | 8                | 0              | 6.540848                | 0.529901  | 0.506623  |
| 36               | 1                | 0              | 6.400458                | 0.134774  | 1.376864  |
| 37               | 6                | 0              | -0.785250               | 2.993814  | 0.040036  |
| 38               | 1                | 0              | -0.388012               | 3.224683  | 1.041229  |
| 39               | 1                | 0              | -0.445590               | 3.762854  | -0.655533 |
| 40               | 1                | 0              | -1.876428               | 3.026249  | 0.078688  |
| 41               | 7                | 0              | -6.267670               | -0.673377 | -0.122476 |
| 42               | 8                | 0              | -6.995336               | -0.521831 | 0.836764  |
| 43               | 8                | 0              | -6.642989               | -1.068137 | -1.206906 |

### Structure 43a (E<sub>2</sub> ax-ax) (M06-2X, DMSO)

Energy (Hartrees): = - 1181.3605229  
No imaginary frequencies

Standard orientation:

| Center<br>Number | Atomic<br>Number | Atomic<br>Type | Coordinates (Angstroms) |           |           |
|------------------|------------------|----------------|-------------------------|-----------|-----------|
|                  |                  |                | X                       | Y         | Z         |
| 1                | 6                | 0              | -2.123565               | 0.805754  | 0.471684  |
| 2                | 6                | 0              | -2.425388               | -0.404112 | 1.095676  |
| 3                | 6                | 0              | -3.608069               | -1.070778 | 0.806771  |
| 4                | 6                | 0              | -4.476463               | -0.501739 | -0.112331 |
| 5                | 6                | 0              | -4.206481               | 0.702119  | -0.747969 |
| 6                | 6                | 0              | -3.019475               | 1.353829  | -0.447873 |
| 7                | 1                | 0              | -1.727391               | -0.828903 | 1.806177  |
| 8                | 1                | 0              | -3.852350               | -2.011702 | 1.280584  |
| 9                | 1                | 0              | -4.908980               | 1.112068  | -1.461014 |
| 10               | 1                | 0              | -2.776846               | 2.288776  | -0.937450 |
| 11               | 6                | 0              | -0.838343               | 1.545614  | 0.819517  |
| 12               | 1                | 0              | -1.041476               | 2.297397  | 1.584969  |
| 13               | 7                | 0              | -0.235821               | 2.147800  | -0.346982 |
| 14               | 8                | 0              | 0.131285                | 0.640099  | 1.347857  |
| 15               | 6                | 0              | 0.811144                | 0.064437  | 0.220990  |
| 16               | 6                | 0              | 0.463328                | 1.006964  | -0.962215 |
| 17               | 1                | 0              | 1.349322                | 1.340634  | -1.498505 |
| 18               | 1                | 0              | -0.203358               | 0.497856  | -1.660770 |
| 19               | 1                | 0              | 0.422181                | -0.946327 | 0.052429  |
| 20               | 6                | 0              | 2.282619                | -0.026835 | 0.595127  |
| 21               | 1                | 0              | 2.707251                | 0.984758  | 0.635118  |
| 22               | 6                | 0              | 3.103998                | -0.840471 | -0.408656 |
| 23               | 1                | 0              | 2.547112                | -1.748894 | -0.673584 |



|    |   |   |           |           |           |
|----|---|---|-----------|-----------|-----------|
| 24 | 6 | 0 | 4.427685  | -1.300215 | 0.226471  |
| 25 | 1 | 0 | 4.208633  | -2.179733 | 0.838431  |
| 26 | 6 | 0 | 5.476827  | -1.675585 | -0.808713 |
| 27 | 1 | 0 | 6.296790  | -2.211031 | -0.321570 |
| 28 | 1 | 0 | 5.049860  | -2.316506 | -1.581593 |
| 29 | 8 | 0 | 2.403516  | -0.660070 | 1.866552  |
| 30 | 1 | 0 | 1.747224  | -0.246010 | 2.440148  |
| 31 | 8 | 0 | 3.265324  | -0.062870 | -1.586543 |
| 32 | 1 | 0 | 4.212873  | 0.057501  | -1.740668 |
| 33 | 8 | 0 | 5.031778  | -0.283015 | 1.018498  |
| 34 | 1 | 0 | 4.453476  | -0.155050 | 1.779907  |
| 35 | 8 | 0 | 5.972537  | -0.502768 | -1.456494 |
| 36 | 1 | 0 | 6.273233  | 0.079488  | -0.746737 |
| 37 | 6 | 0 | 0.682110  | 3.230090  | 0.022544  |
| 38 | 1 | 0 | 1.164718  | 3.607869  | -0.879529 |
| 39 | 1 | 0 | 0.111852  | 4.044596  | 0.472742  |
| 40 | 1 | 0 | 1.459354  | 2.912112  | 0.729481  |
| 41 | 7 | 0 | -5.731449 | -1.202822 | -0.429431 |
| 42 | 8 | 0 | -6.485113 | -0.686519 | -1.228516 |
| 43 | 8 | 0 | -5.947096 | -2.260880 | 0.124918  |

### Structure 43b (<sup>2</sup>E ec-ec H-bond O) (M06-2X, Gas Phase)

Energy (Hartrees): = - 1181.3373272  
 No imaginary frequencies

Standard orientation:

| Center<br>Number | Atomic<br>Number | Atomic<br>Type | Coordinates (Angstroms) |           |           |
|------------------|------------------|----------------|-------------------------|-----------|-----------|
|                  |                  |                | X                       | Y         | Z         |
| 1                | 6                | 0              | -1.960867               | 0.942758  | -0.292682 |
| 2                | 6                | 0              | -1.761696               | -0.396405 | 0.045634  |
| 3                | 6                | 0              | -2.844162               | -1.239538 | 0.229735  |
| 4                | 6                | 0              | -4.121417               | -0.715251 | 0.074781  |
| 5                | 6                | 0              | -4.351135               | 0.607838  | -0.257099 |
| 6                | 6                | 0              | -3.250955               | 1.437293  | -0.444280 |
| 7                | 1                | 0              | -0.749880               | -0.766013 | 0.167244  |
| 8                | 1                | 0              | -2.724689               | -2.281876 | 0.490770  |
| 9                | 1                | 0              | -5.365952               | 0.964046  | -0.366489 |
| 10               | 1                | 0              | -3.400914               | 2.477296  | -0.711942 |
| 11               | 6                | 0              | -0.762884               | 1.842176  | -0.470560 |
| 12               | 1                | 0              | -1.093028               | 2.833890  | -0.835463 |
| 13               | 7                | 0              | 0.018708                | 1.958979  | 0.746757  |
| 14               | 8                | 0              | 0.135829                | 1.289361  | -1.417203 |
| 15               | 6                | 0              | 1.484193                | 1.464508  | -0.944058 |
| 16               | 6                | 0              | 1.329630                | 2.378687  | 0.264772  |
| 17               | 1                | 0              | 2.105425                | 2.212083  | 1.011375  |
| 18               | 1                | 0              | 1.329662                | 3.436734  | -0.046525 |
| 19               | 1                | 0              | 2.064748                | 1.909234  | -1.756111 |
| 20               | 6                | 0              | 2.035138                | 0.083277  | -0.592558 |
| 21               | 1                | 0              | 1.621642                | -0.219368 | 0.378808  |
| 22               | 6                | 0              | 3.559705                | 0.067012  | -0.469943 |
| 23               | 1                | 0              | 3.990113                | 0.604224  | -1.326983 |
| 24               | 6                | 0              | 4.087058                | -1.379145 | -0.543758 |
| 25               | 1                | 0              | 4.153371                | -1.649887 | -1.602169 |
| 26               | 6                | 0              | 5.456319                | -1.531500 | 0.107005  |
| 27               | 1                | 0              | 5.891952                | -2.493902 | -0.177584 |
| 28               | 1                | 0              | 6.128196                | -0.729627 | -0.202840 |
| 29               | 8                | 0              | 1.664755                | -0.850115 | -1.598908 |
| 30               | 1                | 0              | 0.783132                | -0.594448 | -1.897831 |
| 31               | 8                | 0              | 3.922659                | 0.767687  | 0.704710  |
| 32               | 1                | 0              | 4.356732                | 0.153516  | 1.313938  |
| 33               | 8                | 0              | 3.251591                | -2.299758 | 0.143834  |
| 34               | 1                | 0              | 2.431983                | -2.356591 | -0.360683 |
| 35               | 8                | 0              | 5.328435                | -1.445060 | 1.520985  |
| 36               | 1                | 0              | 4.657482                | -2.095516 | 1.761299  |
| 37               | 6                | 0              | -0.572731               | 2.838927  | 1.735344  |
| 38               | 1                | 0              | -1.549548               | 2.453263  | 2.033975  |
| 39               | 1                | 0              | 0.065925                | 2.868838  | 2.618441  |
| 40               | 1                | 0              | -0.698178               | 3.867060  | 1.356239  |
| 41               | 7                | 0              | -5.283143               | -1.609242 | 0.271964  |
| 42               | 8                | 0              | -6.386318               | -1.127027 | 0.145317  |
| 43               | 8                | 0              | -5.054989               | -2.765704 | 0.547202  |

### Structure 43b (<sup>2</sup>E ec-ec H-bond N) (M06-2X, Gas Phase)

Energy (Hartrees): = - 1181.340031  
 No imaginary frequencies

Standard orientation:

| Center<br>Number | Atomic<br>Number | Atomic<br>Type | Coordinates (Angstroms) |   |   |
|------------------|------------------|----------------|-------------------------|---|---|
|                  |                  |                | X                       | Y | Z |

|    |   |   |           |           |           |
|----|---|---|-----------|-----------|-----------|
| 1  | 6 | 0 | -1.771523 | 0.857393  | -0.460112 |
| 2  | 6 | 0 | -1.501801 | -0.423700 | 0.021824  |
| 3  | 6 | 0 | -2.536090 | -1.327480 | 0.206956  |
| 4  | 6 | 0 | -3.829524 | -0.925609 | -0.095901 |
| 5  | 6 | 0 | -4.126844 | 0.337090  | -0.578333 |
| 6  | 6 | 0 | -3.077812 | 1.229145  | -0.764236 |
| 7  | 1 | 0 | -0.478888 | -0.700959 | 0.247415  |
| 8  | 1 | 0 | -2.363121 | -2.328891 | 0.576073  |
| 9  | 1 | 0 | -5.151710 | 0.595855  | -0.805695 |
| 10 | 1 | 0 | -3.278112 | 2.220516  | -1.156569 |
| 11 | 6 | 0 | -0.645878 | 1.846185  | -0.633099 |
| 12 | 1 | 0 | -0.975154 | 2.664078  | -1.301843 |
| 13 | 7 | 0 | -0.187427 | 2.402642  | 0.643289  |
| 14 | 8 | 0 | 0.496517  | 1.228125  | -1.174933 |
| 15 | 6 | 0 | 1.671252  | 1.772426  | -0.554956 |
| 16 | 6 | 0 | 1.130007  | 2.930071  | 0.284911  |
| 17 | 1 | 0 | 1.728464  | 3.129124  | 1.176265  |
| 18 | 1 | 0 | 1.047225  | 3.853767  | -0.308861 |
| 19 | 1 | 0 | 2.369569  | 2.088013  | -1.331233 |
| 20 | 6 | 0 | 2.347748  | 0.700985  | 0.289717  |
| 21 | 1 | 0 | 3.243521  | 1.149290  | 0.740984  |
| 22 | 6 | 0 | 2.829893  | -0.461342 | -0.579745 |
| 23 | 1 | 0 | 2.005949  | -0.772479 | -1.233498 |
| 24 | 6 | 0 | 3.209699  | -1.668324 | 0.300532  |
| 25 | 1 | 0 | 2.297761  | -2.245659 | 0.485209  |
| 26 | 6 | 0 | 4.250142  | -2.563576 | -0.360788 |
| 27 | 1 | 0 | 4.306623  | -3.517290 | 0.172813  |
| 28 | 1 | 0 | 3.996657  | -2.751616 | -1.404913 |
| 29 | 8 | 0 | 1.494892  | 0.195575  | 1.310716  |
| 30 | 1 | 0 | 0.770308  | 0.826108  | 1.457131  |
| 31 | 8 | 0 | 3.870467  | 0.027051  | -1.404930 |
| 32 | 1 | 0 | 4.704550  | -0.373655 | -1.124498 |
| 33 | 8 | 0 | 3.797009  | -1.281449 | 1.536935  |
| 34 | 1 | 0 | 3.105988  | -0.847508 | 2.051394  |
| 35 | 8 | 0 | 5.515702  | -1.915101 | -0.348482 |
| 36 | 1 | 0 | 5.668782  | -1.666326 | 0.571000  |
| 37 | 6 | 0 | -1.095121 | 3.383592  | 1.213744  |
| 38 | 1 | 0 | -2.052529 | 2.910811  | 1.438496  |
| 39 | 1 | 0 | -0.675348 | 3.767134  | 2.144058  |
| 40 | 1 | 0 | -1.266108 | 4.228860  | 0.528643  |
| 41 | 7 | 0 | -4.936447 | -1.887266 | 0.099563  |
| 42 | 8 | 0 | -6.057733 | -1.505853 | -0.152103 |
| 43 | 8 | 0 | -4.649627 | -2.993090 | 0.499621  |

### Structure 43b (<sup>2</sup>E ax-ec) (M06-2X, Gas Phase)

Energy (Hartrees): = - 1181.3339075

No imaginary frequencies

Standard orientation:

| Center Number | Atomic Number | Atomic Type | Coordinates (Angstroms) |           |           |
|---------------|---------------|-------------|-------------------------|-----------|-----------|
|               |               |             | X                       | Y         | Z         |
| 1             | 6             | 0           | -2.159838               | 0.680360  | -0.496494 |
| 2             | 6             | 0           | -2.329234               | -0.698830 | -0.554845 |
| 3             | 6             | 0           | -3.561661               | -1.264836 | -0.253125 |
| 4             | 6             | 0           | -4.603545               | -0.426419 | 0.103738  |
| 5             | 6             | 0           | -4.464333               | 0.952839  | 0.168652  |
| 6             | 6             | 0           | -3.230011               | 1.501980  | -0.138044 |
| 7             | 1             | 0           | -1.493053               | -1.324256 | -0.836094 |
| 8             | 1             | 0           | -3.725702               | -2.332828 | -0.289017 |
| 9             | 1             | 0           | -5.311059               | 1.562199  | 0.452864  |
| 10            | 1             | 0           | -3.081970               | 2.574894  | -0.086903 |
| 11            | 6             | 0           | -0.833212               | 1.326028  | -0.790804 |
| 12            | 1             | 0           | -0.968848               | 2.093231  | -1.566244 |
| 13            | 7             | 0           | -0.215115               | 1.966156  | 0.353009  |
| 14            | 8             | 0           | 0.110896                | 0.369940  | -1.278270 |
| 15            | 6             | 0           | 1.411966                | 0.932643  | -1.067585 |
| 16            | 6             | 0           | 1.158617                | 2.144945  | -0.129786 |
| 17            | 1             | 0           | 1.870701                | 2.193929  | 0.690919  |
| 18            | 1             | 0           | 1.215787                | 3.071648  | -0.704906 |
| 19            | 1             | 0           | 1.814067                | 1.252375  | -2.036644 |
| 20            | 6             | 0           | 2.295449                | -0.180435 | -0.528380 |
| 21            | 1             | 0           | 1.951322                | -0.473951 | 0.471022  |
| 22            | 6             | 0           | 3.763610                | 0.232321  | -0.393178 |
| 23            | 1             | 0           | 4.055920                | 0.817438  | -1.277507 |
| 24            | 6             | 0           | 4.668291                | -1.012337 | -0.367485 |
| 25            | 1             | 0           | 4.786052                | -1.352417 | -1.401089 |
| 26            | 6             | 0           | 6.039723                | -0.722378 | 0.229656  |
| 27            | 1             | 0           | 6.717694                | -1.551973 | 0.008245  |
| 28            | 1             | 0           | 6.458450                | 0.198405  | -0.179852 |
| 29            | 8             | 0           | 2.229285                | -1.291874 | -1.417331 |
| 30            | 1             | 0           | 1.307997                | -1.379773 | -1.685041 |
| 31            | 8             | 0           | 3.877744                | 1.062544  | 0.746868  |

|    |   |   |           |           |           |
|----|---|---|-----------|-----------|-----------|
| 32 | 1 | 0 | 4.529611  | 0.678226  | 1.350521  |
| 33 | 8 | 0 | 4.131798  | -2.054222 | 0.434729  |
| 34 | 1 | 0 | 3.357145  | -2.387962 | -0.031767 |
| 35 | 8 | 0 | 5.925596  | -0.538800 | 1.635471  |
| 36 | 1 | 0 | 5.468995  | -1.322818 | 1.963988  |
| 37 | 6 | 0 | -0.280700 | 1.162528  | 1.578381  |
| 38 | 1 | 0 | 0.361225  | 1.627356  | 2.326082  |
| 39 | 1 | 0 | -1.301567 | 1.159797  | 1.961060  |
| 40 | 1 | 0 | 0.039577  | 0.121536  | 1.439319  |
| 41 | 7 | 0 | -5.916373 | -1.023336 | 0.428412  |
| 42 | 8 | 0 | -6.811749 | -0.268251 | 0.735218  |
| 43 | 8 | 0 | -6.011402 | -2.228744 | 0.367927  |

### Structure 43b (<sup>2</sup>E ec-ec H-bond O) (M06-2X, Benzene)

Energy (Hartrees): = - 1181.3583325  
No imaginary frequencies

Standard orientation:

| Center<br>Number | Atomic<br>Number | Atomic<br>Type | Coordinates (Angstroms) |           |           |
|------------------|------------------|----------------|-------------------------|-----------|-----------|
|                  |                  |                | X                       | Y         | Z         |
| 1                | 6                | 0              | -1.978090               | 0.927589  | -0.297052 |
| 2                | 6                | 0              | -1.787200               | -0.401804 | 0.082443  |
| 3                | 6                | 0              | -2.873663               | -1.239129 | 0.268197  |
| 4                | 6                | 0              | -4.147167               | -0.717678 | 0.073573  |
| 5                | 6                | 0              | -4.368657               | 0.596528  | -0.300100 |
| 6                | 6                | 0              | -3.264276               | 1.419647  | -0.487992 |
| 7                | 1                | 0              | -0.779600               | -0.770768 | 0.236349  |
| 8                | 1                | 0              | -2.754661               | -2.273177 | 0.560830  |
| 9                | 1                | 0              | -5.378451               | 0.956772  | -0.440200 |
| 10               | 1                | 0              | -3.407544               | 2.451972  | -0.787053 |
| 11               | 6                | 0              | -0.776099               | 1.822295  | -0.475648 |
| 12               | 1                | 0              | -1.100586               | 2.808785  | -0.855944 |
| 13               | 7                | 0              | -0.003948               | 1.954653  | 0.746740  |
| 14               | 8                | 0              | 0.129909                | 1.251273  | -1.406093 |
| 15               | 6                | 0              | 1.476702                | 1.450424  | -0.934537 |
| 16               | 6                | 0              | 1.309068                | 2.372502  | 0.266629  |
| 17               | 1                | 0              | 2.078547                | 2.216204  | 1.021791  |
| 18               | 1                | 0              | 1.307525                | 3.427548  | -0.052643 |
| 19               | 1                | 0              | 2.051158                | 1.899416  | -1.748715 |
| 20               | 6                | 0              | 2.048855                | 0.078598  | -0.580263 |
| 21               | 1                | 0              | 1.633304                | -0.236677 | 0.386161  |
| 22               | 6                | 0              | 3.574098                | 0.083932  | -0.449304 |
| 23               | 1                | 0              | 4.002006                | 0.647265  | -1.290243 |
| 24               | 6                | 0              | 4.126641                | -1.350399 | -0.550882 |
| 25               | 1                | 0              | 4.189530                | -1.603456 | -1.613723 |
| 26               | 6                | 0              | 5.505872                | -1.491172 | 0.078908  |
| 27               | 1                | 0              | 5.951316                | -2.442957 | -0.225847 |
| 28               | 1                | 0              | 6.164120                | -0.678156 | -0.231637 |
| 29               | 8                | 0              | 1.700373                | -0.856355 | -1.594549 |
| 30               | 1                | 0              | 0.802552                | -0.633781 | -1.871675 |
| 31               | 8                | 0              | 3.920731                | 0.760133  | 0.746966  |
| 32               | 1                | 0              | 4.373143                | 0.136894  | 1.332754  |
| 33               | 8                | 0              | 3.312832                | -2.296320 | 0.131196  |
| 34               | 1                | 0              | 2.487100                | -2.352199 | -0.363942 |
| 35               | 8                | 0              | 5.401749                | -1.428050 | 1.498564  |
| 36               | 1                | 0              | 4.753056                | -2.100189 | 1.741914  |
| 37               | 6                | 0              | -0.601586               | 2.854084  | 1.714903  |
| 38               | 1                | 0              | -1.580087               | 2.475495  | 2.018337  |
| 39               | 1                | 0              | 0.031705                | 2.902655  | 2.601647  |
| 40               | 1                | 0              | -0.725803               | 3.874493  | 1.315847  |
| 41               | 7                | 0              | -5.311682               | -1.602845 | 0.275751  |
| 42               | 8                | 0              | -6.415483               | -1.123018 | 0.134769  |
| 43               | 8                | 0              | -5.094600               | -2.757826 | 0.571060  |

### Structure 43b (<sup>2</sup>E ec-ec H-bond N) (M06-2X, Benzene)

Energy (Hartrees): = - 1181.3617887  
No imaginary frequencies

Standard orientation:

| Center<br>Number | Atomic<br>Number | Atomic<br>Type | Coordinates (Angstroms) |           |           |
|------------------|------------------|----------------|-------------------------|-----------|-----------|
|                  |                  |                | X                       | Y         | Z         |
| 1                | 6                | 0              | -1.773602               | 0.858557  | -0.467070 |
| 2                | 6                | 0              | -1.502389               | -0.424131 | 0.009880  |
| 3                | 6                | 0              | -2.534197               | -1.330341 | 0.195029  |
| 4                | 6                | 0              | -3.829125               | -0.928015 | -0.102753 |
| 5                | 6                | 0              | -4.128305               | 0.336297  | -0.582041 |
| 6                | 6                | 0              | -3.081214               | 1.230227  | -0.767539 |
| 7                | 1                | 0              | -0.479728               | -0.701974 | 0.235183  |
| 8                | 1                | 0              | -2.353434               | -2.330892 | 0.562937  |

|    |   |   |           |           |           |
|----|---|---|-----------|-----------|-----------|
| 9  | 1 | 0 | -5.152129 | 0.601516  | -0.807113 |
| 10 | 1 | 0 | -3.284413 | 2.223125  | -1.154048 |
| 11 | 6 | 0 | -0.649478 | 1.850969  | -0.634103 |
| 12 | 1 | 0 | -0.979734 | 2.672203  | -1.295982 |
| 13 | 7 | 0 | -0.187999 | 2.395269  | 0.645269  |
| 14 | 8 | 0 | 0.494472  | 1.235042  | -1.182250 |
| 15 | 6 | 0 | 1.669428  | 1.780824  | -0.560414 |
| 16 | 6 | 0 | 1.125597  | 2.932634  | 0.284344  |
| 17 | 1 | 0 | 1.724897  | 3.133074  | 1.174458  |
| 18 | 1 | 0 | 1.034669  | 3.856226  | -0.307312 |
| 19 | 1 | 0 | 2.364316  | 2.106059  | -1.335721 |
| 20 | 6 | 0 | 2.350938  | 0.709843  | 0.281563  |
| 21 | 1 | 0 | 3.245326  | 1.163478  | 0.730065  |
| 22 | 6 | 0 | 2.833548  | -0.458212 | -0.580952 |
| 23 | 1 | 0 | 2.013488  | -0.772590 | -1.237485 |
| 24 | 6 | 0 | 3.208121  | -1.663431 | 0.304186  |
| 25 | 1 | 0 | 2.294636  | -2.237514 | 0.489474  |
| 26 | 6 | 0 | 4.241341  | -2.570250 | -0.349955 |
| 27 | 1 | 0 | 4.294165  | -3.518231 | 0.194617  |
| 28 | 1 | 0 | 3.982498  | -2.773664 | -1.389984 |
| 29 | 8 | 0 | 1.500067  | 0.208254  | 1.307178  |
| 30 | 1 | 0 | 0.771338  | 0.838600  | 1.442938  |
| 31 | 8 | 0 | 3.882732  | 0.020575  | -1.405740 |
| 32 | 1 | 0 | 4.710266  | -0.386239 | -1.115255 |
| 33 | 8 | 0 | 3.796293  | -1.273259 | 1.540734  |
| 34 | 1 | 0 | 3.107416  | -0.824785 | 2.046294  |
| 35 | 8 | 0 | 5.515283  | -1.932334 | -0.350866 |
| 36 | 1 | 0 | 5.679031  | -1.681179 | 0.566544  |
| 37 | 6 | 0 | -1.092793 | 3.368534  | 1.234076  |
| 38 | 1 | 0 | -2.044140 | 2.891589  | 1.476149  |
| 39 | 1 | 0 | -0.658905 | 3.749850  | 2.159187  |
| 40 | 1 | 0 | -1.280167 | 4.216395  | 0.556986  |
| 41 | 7 | 0 | -4.933799 | -1.886232 | 0.102716  |
| 42 | 8 | 0 | -6.057658 | -1.514115 | -0.157160 |
| 43 | 8 | 0 | -4.651693 | -2.987829 | 0.521437  |

-----

**Structure 43b (2E ax-ec) (M06-2X, Benzene)**

Energy (Hartrees): = - 1181.3546491  
 No imaginary frequencies

Standard orientation:

| Center<br>Number | Atomic<br>Number | Atomic<br>Type | Coordinates (Angstroms) |           |           |
|------------------|------------------|----------------|-------------------------|-----------|-----------|
|                  |                  |                | X                       | Y         | Z         |
| 1                | 6                | 0              | -2.165596               | 0.679401  | -0.496804 |
| 2                | 6                | 0              | -2.331670               | -0.701233 | -0.541071 |
| 3                | 6                | 0              | -3.565104               | -1.266643 | -0.243885 |
| 4                | 6                | 0              | -4.612570               | -0.426392 | 0.094627  |
| 5                | 6                | 0              | -4.477355               | 0.954589  | 0.141942  |
| 6                | 6                | 0              | -3.241600               | 1.502747  | -0.159448 |
| 7                | 1                | 0              | -1.493964               | -1.331906 | -0.806347 |
| 8                | 1                | 0              | -3.719716               | -2.336393 | -0.268664 |
| 9                | 1                | 0              | -5.324698               | 1.570876  | 0.409216  |
| 10               | 1                | 0              | -3.099618               | 2.576989  | -0.121373 |
| 11               | 6                | 0              | -0.835973               | 1.325459  | -0.778877 |
| 12               | 1                | 0              | -0.965527               | 2.095876  | -1.551719 |
| 13               | 7                | 0              | -0.225402               | 1.960476  | 0.373806  |
| 14               | 8                | 0              | 0.111633                | 0.370109  | -1.259058 |
| 15               | 6                | 0              | 1.411001                | 0.938276  | -1.047200 |
| 16               | 6                | 0              | 1.152186                | 2.142003  | -0.100316 |
| 17               | 1                | 0              | 1.856175                | 2.182060  | 0.727804  |
| 18               | 1                | 0              | 1.216084                | 3.073656  | -0.666449 |
| 19               | 1                | 0              | 1.808404                | 1.269237  | -2.014067 |
| 20               | 6                | 0              | 2.300307                | -0.174963 | -0.515155 |
| 21               | 1                | 0              | 1.967628                | -0.463498 | 0.489695  |
| 22               | 6                | 0              | 3.772926                | 0.232050  | -0.406482 |
| 23               | 1                | 0              | 4.054394                | 0.806216  | -1.300412 |
| 24               | 6                | 0              | 4.675356                | -1.014964 | -0.378718 |
| 25               | 1                | 0              | 4.789067                | -1.361905 | -1.410310 |
| 26               | 6                | 0              | 6.052311                | -0.726863 | 0.203957  |
| 27               | 1                | 0              | 6.724242                | -1.561646 | -0.016705 |
| 28               | 1                | 0              | 6.474866                | 0.186445  | -0.218335 |
| 29               | 8                | 0              | 2.218344                | -1.291195 | -1.398113 |
| 30               | 1                | 0              | 1.289474                | -1.389642 | -1.636133 |
| 31               | 8                | 0              | 3.913337                | 1.076625  | 0.722912  |
| 32               | 1                | 0              | 4.553002                | 0.676839  | 1.329289  |
| 33               | 8                | 0              | 4.141385                | -2.052403 | 0.433803  |
| 34               | 1                | 0              | 3.355466                | -2.376894 | -0.020980 |
| 35               | 8                | 0              | 5.955770                | -0.531635 | 1.612283  |
| 36               | 1                | 0              | 5.507558                | -1.315183 | 1.954119  |
| 37               | 6                | 0              | -0.295186               | 1.147716  | 1.592892  |
| 38               | 1                | 0              | 0.340186                | 1.609306  | 2.348891  |
| 39               | 1                | 0              | -1.317403               | 1.139425  | 1.973231  |
| 40               | 1                | 0              | 0.030427                | 0.108886  | 1.450688  |

|    |   |   |           |           |          |
|----|---|---|-----------|-----------|----------|
| 41 | 7 | 0 | -5.923132 | -1.021345 | 0.419214 |
| 42 | 8 | 0 | -6.831393 | -0.266786 | 0.692486 |
| 43 | 8 | 0 | -6.014139 | -2.229686 | 0.396270 |

-----  
**Structure 43b (<sup>2</sup>E ec-ec H-bond O) (M06-2X, DMSO)**

Energy (Hartrees): = - 1181.3619661  
 No imaginary frequencies

Standard orientation:

| Center<br>Number | Atomic<br>Number | Atomic<br>Type | Coordinates (Angstroms) |           |           |
|------------------|------------------|----------------|-------------------------|-----------|-----------|
|                  |                  |                | X                       | Y         | Z         |
| 1                | 6                | 0              | -1.983319               | 0.910721  | -0.323803 |
| 2                | 6                | 0              | -1.789162               | -0.438033 | -0.020140 |
| 3                | 6                | 0              | -2.875117               | -1.273312 | 0.180565  |
| 4                | 6                | 0              | -4.150755               | -0.730349 | 0.077007  |
| 5                | 6                | 0              | -4.375495               | 0.603468  | -0.221196 |
| 6                | 6                | 0              | -3.272354               | 1.424131  | -0.425145 |
| 7                | 1                | 0              | -0.782448               | -0.832615 | 0.061451  |
| 8                | 1                | 0              | -2.745081               | -2.320991 | 0.415008  |
| 9                | 1                | 0              | -5.384116               | 0.986425  | -0.294750 |
| 10               | 1                | 0              | -3.418459               | 2.471847  | -0.663300 |
| 11               | 6                | 0              | -0.786987               | 1.812211  | -0.506870 |
| 12               | 1                | 0              | -1.116216               | 2.792159  | -0.894174 |
| 13               | 7                | 0              | -0.026090               | 1.962605  | 0.724507  |
| 14               | 8                | 0              | 0.130040                | 1.238524  | -1.426282 |
| 15               | 6                | 0              | 1.472795                | 1.448459  | -0.944574 |
| 16               | 6                | 0              | 1.289021                | 2.381407  | 0.244609  |
| 17               | 1                | 0              | 2.051993                | 2.241677  | 1.009458  |
| 18               | 1                | 0              | 1.280591                | 3.431201  | -0.087782 |
| 19               | 1                | 0              | 2.055120                | 1.893969  | -1.754855 |
| 20               | 6                | 0              | 2.047500                | 0.081129  | -0.582660 |
| 21               | 1                | 0              | 1.593672                | -0.258382 | 0.357779  |
| 22               | 6                | 0              | 3.565968                | 0.099672  | -0.385328 |
| 23               | 1                | 0              | 4.024890                | 0.707962  | -1.176750 |
| 24               | 6                | 0              | 4.141800                | -1.318630 | -0.529404 |
| 25               | 1                | 0              | 4.200293                | -1.539525 | -1.599116 |
| 26               | 6                | 0              | 5.532804                | -1.454656 | 0.071231  |
| 27               | 1                | 0              | 5.981352                | -2.396338 | -0.258225 |
| 28               | 1                | 0              | 6.174807                | -0.630514 | -0.243654 |
| 29               | 8                | 0              | 1.751711                | -0.840890 | -1.627217 |
| 30               | 1                | 0              | 0.842768                | -0.656360 | -1.897020 |
| 31               | 8                | 0              | 3.842317                | 0.710288  | 0.867547  |
| 32               | 1                | 0              | 4.377774                | 0.095577  | 1.388458  |
| 33               | 8                | 0              | 3.348050                | -2.295372 | 0.136068  |
| 34               | 1                | 0              | 2.516642                | -2.345359 | -0.350690 |
| 35               | 8                | 0              | 5.464328                | -1.415798 | 1.497720  |
| 36               | 1                | 0              | 4.839562                | -2.108340 | 1.748307  |
| 37               | 6                | 0              | -0.634396               | 2.896839  | 1.657114  |
| 38               | 1                | 0              | -1.615129               | 2.528318  | 1.966355  |
| 39               | 1                | 0              | -0.006210               | 2.979525  | 2.545307  |
| 40               | 1                | 0              | -0.757745               | 3.899089  | 1.217038  |
| 41               | 7                | 0              | -5.311518               | -1.611702 | 0.294141  |
| 42               | 8                | 0              | -6.419385               | -1.123584 | 0.212595  |
| 43               | 8                | 0              | -5.097637               | -2.779915 | 0.543591  |

-----  
**Structure 43b (<sup>2</sup>E ec-ec H-bond N) (M06-2X, DMSO)**

Energy (Hartrees): = - 1181.3657379  
 No imaginary frequencies

Standard orientation:

| Center<br>Number | Atomic<br>Number | Atomic<br>Type | Coordinates (Angstroms) |           |           |
|------------------|------------------|----------------|-------------------------|-----------|-----------|
|                  |                  |                | X                       | Y         | Z         |
| 1                | 6                | 0              | -1.755107               | 0.866696  | -0.477627 |
| 2                | 6                | 0              | -1.464929               | -0.427229 | -0.042402 |
| 3                | 6                | 0              | -2.486838               | -1.343741 | 0.148957  |
| 4                | 6                | 0              | -3.791890               | -0.937865 | -0.098078 |
| 5                | 6                | 0              | -4.110667               | 0.339063  | -0.531725 |
| 6                | 6                | 0              | -3.072902               | 1.241663  | -0.726862 |
| 7                | 1                | 0              | -0.436503               | -0.709835 | 0.149045  |
| 8                | 1                | 0              | -2.284179               | -2.352344 | 0.482570  |
| 9                | 1                | 0              | -5.140175               | 0.612828  | -0.717673 |
| 10               | 1                | 0              | -3.290803               | 2.245442  | -1.075415 |
| 11               | 6                | 0              | -0.643896               | 1.872567  | -0.650495 |
| 12               | 1                | 0              | -0.986247               | 2.691647  | -1.305597 |
| 13               | 7                | 0              | -0.182722               | 2.413182  | 0.630513  |
| 14               | 8                | 0              | 0.505052                | 1.267125  | -1.209501 |
| 15               | 6                | 0              | 1.677277                | 1.804482  | -0.571535 |
| 16               | 6                | 0              | 1.130843                | 2.955453  | 0.269231  |
| 17               | 1                | 0              | 1.728057                | 3.159786  | 1.159502  |

|    |   |   |           |           |           |
|----|---|---|-----------|-----------|-----------|
| 18 | 1 | 0 | 1.033914  | 3.874861  | -0.325860 |
| 19 | 1 | 0 | 2.379525  | 2.133332  | -1.338165 |
| 20 | 6 | 0 | 2.346648  | 0.730656  | 0.276665  |
| 21 | 1 | 0 | 3.250238  | 1.178162  | 0.711799  |
| 22 | 6 | 0 | 2.797182  | -0.462798 | -0.567906 |
| 23 | 1 | 0 | 1.965745  | -0.774761 | -1.210077 |
| 24 | 6 | 0 | 3.154029  | -1.661498 | 0.332886  |
| 25 | 1 | 0 | 2.230861  | -2.214738 | 0.530499  |
| 26 | 6 | 0 | 4.158812  | -2.602902 | -0.313671 |
| 27 | 1 | 0 | 4.198199  | -3.539389 | 0.250783  |
| 28 | 1 | 0 | 3.879674  | -2.824214 | -1.344571 |
| 29 | 8 | 0 | 1.496290  | 0.261546  | 1.319610  |
| 30 | 1 | 0 | 0.760819  | 0.893389  | 1.422294  |
| 31 | 8 | 0 | 3.852230  | -0.027631 | -1.415534 |
| 32 | 1 | 0 | 4.669880  | -0.443200 | -1.110225 |
| 33 | 8 | 0 | 3.758742  | -1.264899 | 1.561090  |
| 34 | 1 | 0 | 3.087797  | -0.772427 | 2.050431  |
| 35 | 8 | 0 | 5.450785  | -1.995174 | -0.345949 |
| 36 | 1 | 0 | 5.635047  | -1.731145 | 0.564602  |
| 37 | 6 | 0 | -1.088100 | 3.394801  | 1.210016  |
| 38 | 1 | 0 | -2.042326 | 2.923181  | 1.452283  |
| 39 | 1 | 0 | -0.652562 | 3.781657  | 2.132017  |
| 40 | 1 | 0 | -1.269021 | 4.233801  | 0.522175  |
| 41 | 7 | 0 | -4.883385 | -1.905891 | 0.107870  |
| 42 | 8 | 0 | -6.023160 | -1.518044 | -0.044890 |
| 43 | 8 | 0 | -4.584683 | -3.039569 | 0.420948  |

-----

**Structure 43b (<sup>2</sup>E ax-ec) (M06-2X, DMSO)**

Energy (Hartrees): = - 1181.358069  
 No imaginary frequencies

Standard orientation:

| Center<br>Number | Atomic<br>Number | Atomic<br>Type | Coordinates (Angstroms) |           |           |
|------------------|------------------|----------------|-------------------------|-----------|-----------|
|                  |                  |                | X                       | Y         | Z         |
| 1                | 6                | 0              | -2.162130               | 0.717399  | -0.476296 |
| 2                | 6                | 0              | -2.293906               | -0.668317 | -0.508192 |
| 3                | 6                | 0              | -3.518728               | -1.259631 | -0.226973 |
| 4                | 6                | 0              | -4.591705               | -0.439355 | 0.083779  |
| 5                | 6                | 0              | -4.490783               | 0.945253  | 0.118796  |
| 6                | 6                | 0              | -3.262896               | 1.519004  | -0.168008 |
| 7                | 1                | 0              | -1.438688               | -1.285865 | -0.750398 |
| 8                | 1                | 0              | -3.641161               | -2.333911 | -0.245497 |
| 9                | 1                | 0              | -5.353360               | 1.550007  | 0.363410  |
| 10               | 1                | 0              | -3.152139               | 2.597525  | -0.146394 |
| 11               | 6                | 0              | -0.840358               | 1.390538  | -0.731571 |
| 12               | 1                | 0              | -0.981804               | 2.204470  | -1.454788 |
| 13               | 7                | 0              | -0.226031               | 1.959597  | 0.456484  |
| 14               | 8                | 0              | 0.107353                | 0.468905  | -1.273167 |
| 15               | 6                | 0              | 1.411065                | 1.007700  | -1.012399 |
| 16               | 6                | 0              | 1.151654                | 2.164460  | -0.012738 |
| 17               | 1                | 0              | 1.854462                | 2.167324  | 0.817468  |
| 18               | 1                | 0              | 1.211912                | 3.119395  | -0.538795 |
| 19               | 1                | 0              | 1.830040                | 1.381134  | -1.953277 |
| 20               | 6                | 0              | 2.278284                | -0.138934 | -0.513532 |
| 21               | 1                | 0              | 1.938610                | -0.453197 | 0.480956  |
| 22               | 6                | 0              | 3.757981                | 0.238331  | -0.393112 |
| 23               | 1                | 0              | 4.050032                | 0.841017  | -1.263709 |
| 24               | 6                | 0              | 4.639376                | -1.021294 | -0.413062 |
| 25               | 1                | 0              | 4.727979                | -1.342329 | -1.454964 |
| 26               | 6                | 0              | 6.035049                | -0.770267 | 0.138149  |
| 27               | 1                | 0              | 6.684106                | -1.613701 | -0.114157 |
| 28               | 1                | 0              | 6.462694                | 0.140812  | -0.283215 |
| 29               | 8                | 0              | 2.175502                | -1.227212 | -1.429433 |
| 30               | 1                | 0              | 1.237519                | -1.326488 | -1.633019 |
| 31               | 8                | 0              | 3.914491                | 1.032958  | 0.774443  |
| 32               | 1                | 0              | 4.578987                | 0.611310  | 1.337096  |
| 33               | 8                | 0              | 4.103994                | -2.071365 | 0.385417  |
| 34               | 1                | 0              | 3.295509                | -2.359199 | -0.055303 |
| 35               | 8                | 0              | 5.985140                | -0.596576 | 1.555505  |
| 36               | 1                | 0              | 5.539556                | -1.381461 | 1.899239  |
| 37               | 6                | 0              | -0.293615               | 1.075247  | 1.626783  |
| 38               | 1                | 0              | 0.354185                | 1.484481  | 2.402612  |
| 39               | 1                | 0              | -1.313342               | 1.054811  | 2.014862  |
| 40               | 1                | 0              | 0.019685                | 0.043962  | 1.420070  |
| 41               | 7                | 0              | -5.891738               | -1.060766 | 0.387187  |
| 42               | 8                | 0              | -6.830375               | -0.328103 | 0.621827  |
| 43               | 8                | 0              | -5.955622               | -2.272699 | 0.388202  |

-----

**Structure 43c (<sup>5</sup>C<sub>2</sub> ec-ec) (M06-2X, Gas Phase)**

Energy (Hartrees): = - 1181.3358108  
 No imaginary frequencies

Standard orientation:

| Center<br>Number | Atomic<br>Number | Atomic<br>Type | Coordinates (Angstroms) |           |           |
|------------------|------------------|----------------|-------------------------|-----------|-----------|
|                  |                  |                | X                       | Y         | Z         |
| 1                | 6                | 0              | -2.239226               | 1.336221  | 0.659238  |
| 2                | 6                | 0              | -1.309742               | 2.498221  | 0.336458  |
| 3                | 6                | 0              | -1.949234               | 0.193741  | -0.317625 |
| 4                | 1                | 0              | -1.469349               | 3.301236  | 1.058744  |
| 5                | 1                | 0              | -1.511261               | 2.890674  | -0.675443 |
| 6                | 1                | 0              | -3.282464               | 1.649730  | 0.581704  |
| 7                | 1                | 0              | -2.203172               | 0.532034  | -1.334804 |
| 8                | 8                | 0              | -0.568780               | -0.128670 | -0.261552 |
| 9                | 7                | 0              | 0.063533                | 2.013271  | 0.471918  |
| 10               | 6                | 0              | -2.707324               | -1.101991 | -0.032730 |
| 11               | 1                | 0              | -2.444744               | -1.821005 | -0.815024 |
| 12               | 6                | 0              | -4.225838               | -0.930408 | -0.030361 |
| 13               | 1                | 0              | -4.515125               | -0.236464 | 0.773610  |
| 14               | 6                | 0              | -4.813572               | -0.447940 | -1.345040 |
| 15               | 1                | 0              | -4.426368               | -1.081661 | -2.156546 |
| 16               | 1                | 0              | -4.525531               | 0.587192  | -1.546246 |
| 17               | 8                | 0              | -2.324669               | -1.706381 | 1.189191  |
| 18               | 1                | 0              | -2.298851               | -0.999843 | 1.848798  |
| 19               | 8                | 0              | -4.816210               | -2.195378 | 0.209643  |
| 20               | 1                | 0              | -4.309878               | -2.600047 | 0.923510  |
| 21               | 8                | 0              | -6.219384               | -0.477619 | -1.298271 |
| 22               | 1                | 0              | -6.452088               | -1.337351 | -0.931050 |
| 23               | 8                | 0              | -2.016741               | 0.923317  | 2.000190  |
| 24               | 1                | 0              | -1.057958               | 0.979472  | 2.123621  |
| 25               | 6                | 0              | 1.021343                | 3.106405  | 0.356857  |
| 26               | 1                | 0              | 1.033838                | 3.546432  | -0.653972 |
| 27               | 1                | 0              | 0.746339                | 3.887184  | 1.066572  |
| 28               | 1                | 0              | 2.025092                | 2.760146  | 0.599874  |
| 29               | 6                | 0              | 1.702253                | 0.407137  | -0.413366 |
| 30               | 6                | 0              | 2.019038                | -0.450529 | 0.639292  |
| 31               | 6                | 0              | 2.671677                | 0.754755  | -1.348271 |
| 32               | 6                | 0              | 3.305291                | -0.951085 | 0.767353  |
| 33               | 1                | 0              | 1.241245                | -0.740030 | 1.334543  |
| 34               | 6                | 0              | 3.966189                | 0.264024  | -1.233775 |
| 35               | 1                | 0              | 2.417125                | 1.410998  | -2.173215 |
| 36               | 6                | 0              | 4.254305                | -0.577987 | -0.173025 |
| 37               | 1                | 0              | 3.583198                | -1.621290 | 1.568848  |
| 38               | 1                | 0              | 4.741816                | 0.513435  | -1.944377 |
| 39               | 6                | 0              | 0.296425                | 0.949323  | -0.509879 |
| 40               | 1                | 0              | 0.114025                | 1.341678  | -1.531839 |
| 41               | 7                | 0              | 5.629508                | -1.108547 | -0.045158 |
| 42               | 8                | 0              | 5.859047                | -1.841371 | 0.890076  |
| 43               | 8                | 0              | 6.435899                | -0.773261 | -0.883698 |

**Structure 43c (<sup>5</sup>C<sub>2</sub> ax-ec) (M06-2X, Gas Phase)**

Energy (Hartrees): = - 1181.3345548

No imaginary frequencies

Standard orientation:

| Center<br>Number | Atomic<br>Number | Atomic<br>Type | Coordinates (Angstroms) |           |           |
|------------------|------------------|----------------|-------------------------|-----------|-----------|
|                  |                  |                | X                       | Y         | Z         |
| 1                | 6                | 0              | -2.183259               | 1.629741  | 0.013110  |
| 2                | 6                | 0              | -1.114490               | 2.589381  | -0.525473 |
| 3                | 6                | 0              | -1.860706               | 0.216980  | -0.489633 |
| 4                | 1                | 0              | -1.263187               | 3.578478  | -0.090380 |
| 5                | 1                | 0              | -1.227267               | 2.678278  | -1.612983 |
| 6                | 1                | 0              | -3.172754               | 1.927263  | -0.338415 |
| 7                | 1                | 0              | -1.921607               | 0.221388  | -1.589676 |
| 8                | 8                | 0              | -0.525928               | -0.106330 | -0.107112 |
| 9                | 7                | 0              | 0.254497                | 2.144237  | -0.248652 |
| 10               | 6                | 0              | -2.756500               | -0.915327 | 0.018913  |
| 11               | 1                | 0              | -2.289011               | -1.845051 | -0.322779 |
| 12               | 6                | 0              | -4.169717               | -0.838528 | -0.558958 |
| 13               | 1                | 0              | -4.125596               | -0.683504 | -1.646653 |
| 14               | 6                | 0              | -4.936083               | -2.120876 | -0.279554 |
| 15               | 1                | 0              | -4.857338               | -2.347108 | 0.788268  |
| 16               | 1                | 0              | -4.510792               | -2.946363 | -0.861766 |
| 17               | 8                | 0              | -2.808781               | -0.993248 | 1.424479  |
| 18               | 1                | 0              | -3.317597               | -0.222197 | 1.711388  |
| 19               | 8                | 0              | -4.826637               | 0.247512  | 0.065674  |
| 20               | 1                | 0              | -5.771241               | 0.085450  | -0.042732 |
| 21               | 8                | 0              | -6.281577               | -1.861380 | -0.658242 |
| 22               | 1                | 0              | -6.849061               | -2.534992 | -0.279718 |
| 23               | 8                | 0              | -2.222987               | 1.673860  | 1.431981  |
| 24               | 1                | 0              | -1.549947               | 1.061617  | 1.751594  |
| 25               | 6                | 0              | 0.719266                | 2.362348  | 1.124303  |
| 26               | 1                | 0              | 0.473176                | 1.539627  | 1.807355  |

|    |   |   |          |           |           |
|----|---|---|----------|-----------|-----------|
| 27 | 1 | 0 | 1.804033 | 2.484382  | 1.131581  |
| 28 | 1 | 0 | 0.265814 | 3.273065  | 1.512570  |
| 29 | 6 | 0 | 1.806778 | 0.261625  | -0.469202 |
| 30 | 6 | 0 | 2.031370 | -0.930068 | 0.212188  |
| 31 | 6 | 0 | 2.883920 | 1.003092  | -0.958310 |
| 32 | 6 | 0 | 3.329847 | -1.386425 | 0.407660  |
| 33 | 1 | 0 | 1.187167 | -1.491474 | 0.589155  |
| 34 | 6 | 0 | 4.182762 | 0.559950  | -0.772750 |
| 35 | 1 | 0 | 2.690434 | 1.939735  | -1.468893 |
| 36 | 6 | 0 | 4.378507 | -0.632682 | -0.089987 |
| 37 | 1 | 0 | 3.538405 | -2.306803 | 0.935363  |
| 38 | 1 | 0 | 5.037186 | 1.112811  | -1.137599 |
| 39 | 6 | 0 | 0.409516 | 0.785117  | -0.706115 |
| 40 | 1 | 0 | 0.215587 | 0.788445  | -1.790628 |
| 41 | 7 | 0 | 5.760747 | -1.113406 | 0.115261  |
| 42 | 8 | 0 | 6.660316 | -0.426413 | -0.315818 |
| 43 | 8 | 0 | 5.906797 | -2.163355 | 0.700479  |

### Structure 43c ( $^5C_2$ ec-ec) (M06-2X, Benzene)

Energy (Hartrees): = - 1181.3591466

No imaginary frequencies

Standard orientation:

| Center<br>Number | Atomic<br>Number | Atomic<br>Type | Coordinates (Angstroms) |           |           |
|------------------|------------------|----------------|-------------------------|-----------|-----------|
|                  |                  |                | X                       | Y         | Z         |
| 1                | 6                | 0              | -2.232493               | 1.364026  | 0.657625  |
| 2                | 6                | 0              | -1.306746               | 2.517001  | 0.294837  |
| 3                | 6                | 0              | -1.952014               | 0.199175  | -0.295354 |
| 4                | 1                | 0              | -1.460434               | 3.341468  | 0.993610  |
| 5                | 1                | 0              | -1.517904               | 2.876905  | -0.726285 |
| 6                | 1                | 0              | -3.276192               | 1.677276  | 0.586427  |
| 7                | 1                | 0              | -2.206941               | 0.518053  | -1.317902 |
| 8                | 8                | 0              | -0.570684               | -0.126587 | -0.234473 |
| 9                | 7                | 0              | 0.068817                | 2.036147  | 0.432213  |
| 10               | 6                | 0              | -2.710563               | -1.089600 | 0.014347  |
| 11               | 1                | 0              | -2.427210               | -1.830531 | -0.740078 |
| 12               | 6                | 0              | -4.230565               | -0.930478 | -0.022655 |
| 13               | 1                | 0              | -4.545285               | -0.208121 | 0.745145  |
| 14               | 6                | 0              | -4.791548               | -0.510308 | -1.368980 |
| 15               | 1                | 0              | -4.376561               | -1.167406 | -2.147038 |
| 16               | 1                | 0              | -4.516331               | 0.520660  | -1.604354 |
| 17               | 8                | 0              | -2.352886               | -1.652190 | 1.265766  |
| 18               | 1                | 0              | -2.293223               | -0.915045 | 1.889663  |
| 19               | 8                | 0              | -4.815530               | -2.192794 | 0.256534  |
| 20               | 1                | 0              | -4.329120               | -2.554637 | 1.006736  |
| 21               | 8                | 0              | -6.200550               | -0.563386 | -1.356956 |
| 22               | 1                | 0              | -6.427566               | -1.411386 | -0.959342 |
| 23               | 8                | 0              | -1.991391               | 0.981852  | 2.007574  |
| 24               | 1                | 0              | -1.031855               | 1.056174  | 2.120638  |
| 25               | 6                | 0              | 1.024740                | 3.125707  | 0.273921  |
| 26               | 1                | 0              | 1.025199                | 3.537707  | -0.748267 |
| 27               | 1                | 0              | 0.760147                | 3.927076  | 0.964866  |
| 28               | 1                | 0              | 2.032713                | 2.788979  | 0.515511  |
| 29               | 6                | 0              | 1.699206                | 0.404224  | -0.416852 |
| 30               | 6                | 0              | 2.040722                | -0.363579 | 0.696496  |
| 31               | 6                | 0              | 2.644078                | 0.663675  | -1.404249 |
| 32               | 6                | 0              | 3.324603                | -0.867531 | 0.829151  |
| 33               | 1                | 0              | 1.285969                | -0.579003 | 1.442532  |
| 34               | 6                | 0              | 3.937089                | 0.169753  | -1.285940 |
| 35               | 1                | 0              | 2.372154                | 1.252433  | -2.273359 |
| 36               | 6                | 0              | 4.248771                | -0.585926 | -0.167590 |
| 37               | 1                | 0              | 3.614019                | -1.471369 | 1.678134  |
| 38               | 1                | 0              | 4.689736                | 0.353862  | -2.040084 |
| 39               | 6                | 0              | 0.293500                | 0.945930  | -0.520901 |
| 40               | 1                | 0              | 0.104024                | 1.306178  | -1.551786 |
| 41               | 7                | 0              | 5.617973                | -1.123062 | -0.037376 |
| 42               | 8                | 0              | 5.859395                | -1.821050 | 0.922944  |
| 43               | 8                | 0              | 6.419701                | -0.833756 | -0.899108 |

### Structure 43c ( $^5C_2$ ax-ec) (M06-2X, Benzene)

Energy (Hartrees): = - 1181.3565148

No imaginary frequencies

Standard orientation:

| Center<br>Number | Atomic<br>Number | Atomic<br>Type | Coordinates (Angstroms) |          |           |
|------------------|------------------|----------------|-------------------------|----------|-----------|
|                  |                  |                | X                       | Y        | Z         |
| 1                | 6                | 0              | -2.183780               | 1.622458 | 0.008964  |
| 2                | 6                | 0              | -1.115274               | 2.586925 | -0.520711 |



|    |   |   |           |           |           |
|----|---|---|-----------|-----------|-----------|
| 3  | 6 | 0 | -1.860501 | 0.214460  | -0.503593 |
| 4  | 1 | 0 | -1.263546 | 3.574102  | -0.080852 |
| 5  | 1 | 0 | -1.228578 | 2.679710  | -1.607443 |
| 6  | 1 | 0 | -3.171764 | 1.924421  | -0.343488 |
| 7  | 1 | 0 | -1.919750 | 0.226972  | -1.602869 |
| 8  | 8 | 0 | -0.524987 | -0.111139 | -0.120075 |
| 9  | 7 | 0 | 0.254594  | 2.140242  | -0.245311 |
| 10 | 6 | 0 | -2.758390 | -0.920021 | -0.005505 |
| 11 | 1 | 0 | -2.316594 | -1.846461 | -0.387071 |
| 12 | 6 | 0 | -4.186240 | -0.806046 | -0.542863 |
| 13 | 1 | 0 | -4.167142 | -0.578748 | -1.618111 |
| 14 | 6 | 0 | -4.946277 | -2.104176 | -0.330198 |
| 15 | 1 | 0 | -4.843932 | -2.405255 | 0.717223  |
| 16 | 1 | 0 | -4.537507 | -2.888704 | -0.976928 |
| 17 | 8 | 0 | -2.775171 | -1.036678 | 1.399636  |
| 18 | 1 | 0 | -3.289947 | -0.280935 | 1.714785  |
| 19 | 8 | 0 | -4.829379 | 0.237131  | 0.167872  |
| 20 | 1 | 0 | -5.775761 | 0.066956  | 0.086188  |
| 21 | 8 | 0 | -6.302655 | -1.824821 | -0.655567 |
| 22 | 1 | 0 | -6.857444 | -2.518788 | -0.291742 |
| 23 | 8 | 0 | -2.229848 | 1.653918  | 1.429582  |
| 24 | 1 | 0 | -1.539333 | 1.058623  | 1.744399  |
| 25 | 6 | 0 | 0.719388  | 2.353899  | 1.127467  |
| 26 | 1 | 0 | 0.469706  | 1.535137  | 1.814564  |
| 27 | 1 | 0 | 1.805144  | 2.471501  | 1.137861  |
| 28 | 1 | 0 | 0.275104  | 3.270037  | 1.515150  |
| 29 | 6 | 0 | 1.808106  | 0.258777  | -0.479046 |
| 30 | 6 | 0 | 2.034055  | -0.931007 | 0.206220  |
| 31 | 6 | 0 | 2.885769  | 1.000552  | -0.967685 |
| 32 | 6 | 0 | 3.332304  | -1.384432 | 0.407563  |
| 33 | 1 | 0 | 1.192459  | -1.495847 | 0.584216  |
| 34 | 6 | 0 | 4.184833  | 0.561482  | -0.775820 |
| 35 | 1 | 0 | 2.695497  | 1.934733  | -1.484203 |
| 36 | 6 | 0 | 4.381469  | -0.628428 | -0.087359 |
| 37 | 1 | 0 | 3.533829  | -2.303952 | 0.939780  |
| 38 | 1 | 0 | 5.035624  | 1.119233  | -1.142171 |
| 39 | 6 | 0 | 0.410306  | 0.783707  | -0.713893 |
| 40 | 1 | 0 | 0.217528  | 0.796360  | -1.798030 |
| 41 | 7 | 0 | 5.761866  | -1.104562 | 0.122552  |
| 42 | 8 | 0 | 6.665125  | -0.420100 | -0.308285 |
| 43 | 8 | 0 | 5.913988  | -2.153031 | 0.711437  |

-----

**Structure 43c (<sup>5</sup>C<sub>2</sub> ec-ec) (M06-2X, DMSO)**

Energy (Hartrees): = - 1181.3664062  
 No imaginary frequencies

Standard orientation:

| Center<br>Number | Atomic<br>Number | Atomic<br>Type | Coordinates (Angstroms) |           |           |
|------------------|------------------|----------------|-------------------------|-----------|-----------|
|                  |                  |                | X                       | Y         | Z         |
| 1                | 6                | 0              | -2.227753               | 1.371110  | 0.645739  |
| 2                | 6                | 0              | -1.304490               | 2.515334  | 0.256616  |
| 3                | 6                | 0              | -1.952094               | 0.188916  | -0.285325 |
| 4                | 1                | 0              | -1.453744               | 3.357258  | 0.935264  |
| 5                | 1                | 0              | -1.517937               | 2.846614  | -0.772126 |
| 6                | 1                | 0              | -3.271028               | 1.682128  | 0.572095  |
| 7                | 1                | 0              | -2.200702               | 0.493240  | -1.312087 |
| 8                | 8                | 0              | -0.569609               | -0.143491 | -0.211573 |
| 9                | 7                | 0              | 0.074004                | 2.038443  | 0.399819  |
| 10               | 6                | 0              | -2.720324               | -1.087571 | 0.044073  |
| 11               | 1                | 0              | -2.437166               | -1.846602 | -0.692294 |
| 12               | 6                | 0              | -4.238443               | -0.918754 | -0.011760 |
| 13               | 1                | 0              | -4.555548               | -0.164131 | 0.721916  |
| 14               | 6                | 0              | -4.777116               | -0.548020 | -1.379824 |
| 15               | 1                | 0              | -4.355684               | -1.234653 | -2.127289 |
| 16               | 1                | 0              | -4.493210               | 0.472153  | -1.645313 |
| 17               | 8                | 0              | -2.379761               | -1.622024 | 1.316542  |
| 18               | 1                | 0              | -2.281350               | -0.860305 | 1.906508  |
| 19               | 8                | 0              | -4.837128               | -2.167431 | 0.314521  |
| 20               | 1                | 0              | -4.367450               | -2.489441 | 1.093440  |
| 21               | 8                | 0              | -6.192193               | -0.599665 | -1.385769 |
| 22               | 1                | 0              | -6.422362               | -1.432446 | -0.958395 |
| 23               | 8                | 0              | -1.976870               | 1.011024  | 2.005375  |
| 24               | 1                | 0              | -1.015157               | 1.085198  | 2.105536  |
| 25               | 6                | 0              | 1.022465                | 3.127241  | 0.184813  |
| 26               | 1                | 0              | 1.009953                | 3.489122  | -0.855106 |
| 27               | 1                | 0              | 0.755922                | 3.956789  | 0.841024  |
| 28               | 1                | 0              | 2.035573                | 2.808403  | 0.432315  |
| 29               | 6                | 0              | 1.698544                | 0.393318  | -0.418890 |
| 30               | 6                | 0              | 2.069832                | -0.283028 | 0.743960  |
| 31               | 6                | 0              | 2.616056                | 0.572167  | -1.449268 |
| 32               | 6                | 0              | 3.355339                | -0.781056 | 0.881724  |
| 33               | 1                | 0              | 1.341282                | -0.426001 | 1.533011  |
| 34               | 6                | 0              | 3.910169                | 0.080778  | -1.328492 |

|    |   |   |          |           |           |
|----|---|---|----------|-----------|-----------|
| 35 | 1 | 0 | 2.322640 | 1.099029  | -2.350246 |
| 36 | 6 | 0 | 4.250532 | -0.586476 | -0.162585 |
| 37 | 1 | 0 | 3.663233 | -1.311694 | 1.772313  |
| 38 | 1 | 0 | 4.638362 | 0.208242  | -2.117763 |
| 39 | 6 | 0 | 0.291222 | 0.927783  | -0.530675 |
| 40 | 1 | 0 | 0.094813 | 1.262092  | -1.566535 |
| 41 | 7 | 0 | 5.618786 | -1.115504 | -0.026557 |
| 42 | 8 | 0 | 5.917340 | -1.655603 | 1.018413  |
| 43 | 8 | 0 | 6.375271 | -0.983563 | -0.966226 |

### Structure 43c ( $^5\text{C}_2$ ax-ec) (M06-2X, DMSO)

Energy (Hartrees): = - 1181.3614204  
No imaginary frequencies

Standard orientation:

| Center<br>Number | Atomic<br>Number | Atomic<br>Type | Coordinates (Angstroms) |           |           |
|------------------|------------------|----------------|-------------------------|-----------|-----------|
|                  |                  |                | X                       | Y         | Z         |
| 1                | 6                | 0              | -2.181155               | 1.617308  | 0.030323  |
| 2                | 6                | 0              | -1.115634               | 2.583583  | -0.499661 |
| 3                | 6                | 0              | -1.861510               | 0.214140  | -0.492234 |
| 4                | 1                | 0              | -1.257495               | 3.569317  | -0.053747 |
| 5                | 1                | 0              | -1.241653               | 2.676841  | -1.584372 |
| 6                | 1                | 0              | -3.167389               | 1.923848  | -0.322729 |
| 7                | 1                | 0              | -1.921135               | 0.237024  | -1.589895 |
| 8                | 8                | 0              | -0.524206               | -0.115356 | -0.110044 |
| 9                | 7                | 0              | 0.259336                | 2.135447  | -0.241680 |
| 10               | 6                | 0              | -2.764051               | -0.920279 | -0.009422 |
| 11               | 1                | 0              | -2.339243               | -1.843822 | -0.414847 |
| 12               | 6                | 0              | -4.193858               | -0.779005 | -0.534405 |
| 13               | 1                | 0              | -4.173032               | -0.485418 | -1.592400 |
| 14               | 6                | 0              | -4.947293               | -2.089873 | -0.401266 |
| 15               | 1                | 0              | -4.849420               | -2.455303 | 0.625988  |
| 16               | 1                | 0              | -4.531142               | -2.830947 | -1.091770 |
| 17               | 8                | 0              | -2.771411               | -1.065694 | 1.397001  |
| 18               | 1                | 0              | -3.288848               | -0.317435 | 1.724141  |
| 19               | 8                | 0              | -4.846273               | 0.218755  | 0.238038  |
| 20               | 1                | 0              | -5.789709               | 0.029460  | 0.157353  |
| 21               | 8                | 0              | -6.306841               | -1.801621 | -0.712436 |
| 22               | 1                | 0              | -6.854531               | -2.514748 | -0.371214 |
| 23               | 8                | 0              | -2.228858               | 1.641374  | 1.454266  |
| 24               | 1                | 0              | -1.532685               | 1.049165  | 1.763695  |
| 25               | 6                | 0              | 0.735555                | 2.339680  | 1.128609  |
| 26               | 1                | 0              | 0.452585                | 1.540997  | 1.826702  |
| 27               | 1                | 0              | 1.826057                | 2.408879  | 1.134150  |
| 28               | 1                | 0              | 0.335493                | 3.280527  | 1.506503  |
| 29               | 6                | 0              | 1.805679                | 0.253365  | -0.484633 |
| 30               | 6                | 0              | 2.045414                | -0.859952 | 0.315433  |
| 31               | 6                | 0              | 2.872189                | 0.923359  | -1.088439 |
| 32               | 6                | 0              | 3.344919                | -1.308682 | 0.517586  |
| 33               | 1                | 0              | 1.215831                | -1.372817 | 0.783323  |
| 34               | 6                | 0              | 4.173360                | 0.490081  | -0.896935 |
| 35               | 1                | 0              | 2.676345                | 1.794051  | -1.704284 |
| 36               | 6                | 0              | 4.382861                | -0.623435 | -0.092762 |
| 37               | 1                | 0              | 3.551251                | -2.169833 | 1.138585  |
| 38               | 1                | 0              | 5.010031                | 0.997089  | -1.357933 |
| 39               | 6                | 0              | 0.407108                | 0.776473  | -0.714530 |
| 40               | 1                | 0              | 0.208200                | 0.789160  | -1.796113 |
| 41               | 7                | 0              | 5.762128                | -1.091099 | 0.121084  |
| 42               | 8                | 0              | 6.664004                | -0.440660 | -0.365700 |
| 43               | 8                | 0              | 5.925928                | -2.101429 | 0.773507  |

### Structure 43d ( $^5\text{C}_2$ ec-ax) (M06-2X, Gas Phase)

Energy (Hartrees): = - 1181.3294613  
No imaginary frequencies

Standard orientation:

| Center<br>Number | Atomic<br>Number | Atomic<br>Type | Coordinates (Angstroms) |           |           |
|------------------|------------------|----------------|-------------------------|-----------|-----------|
|                  |                  |                | X                       | Y         | Z         |
| 1                | 6                | 0              | 1.989981                | 1.145305  | 0.890104  |
| 2                | 6                | 0              | 0.841593                | 2.021014  | 1.390559  |
| 3                | 6                | 0              | 1.464658                | 0.208035  | -0.203291 |
| 4                | 1                | 0              | 1.238168                | 2.767807  | 2.081708  |
| 5                | 1                | 0              | 0.103874                | 1.406068  | 1.927619  |
| 6                | 1                | 0              | 2.415458                | 0.573130  | 1.716601  |
| 7                | 1                | 0              | 0.691991                | -0.443517 | 0.232459  |
| 8                | 8                | 0              | 0.897445                | 0.994143  | -1.248079 |
| 9                | 7                | 0              | 0.304056                | 2.707278  | 0.225538  |
| 10               | 6                | 0              | 2.528421                | -0.680588 | -0.845354 |

|    |   |   |           |           |           |
|----|---|---|-----------|-----------|-----------|
| 11 | 1 | 0 | 2.026663  | -1.339731 | -1.561510 |
| 12 | 6 | 0 | 3.273123  | -1.556200 | 0.161694  |
| 13 | 1 | 0 | 3.827557  | -0.914245 | 0.862571  |
| 14 | 6 | 0 | 2.397101  | -2.516376 | 0.947570  |
| 15 | 1 | 0 | 1.767745  | -3.077529 | 0.241154  |
| 16 | 1 | 0 | 1.744111  | -1.975587 | 1.637618  |
| 17 | 8 | 0 | 3.485082  | 0.044323  | -1.595351 |
| 18 | 1 | 0 | 3.736867  | 0.807914  | -1.058794 |
| 19 | 8 | 0 | 4.189470  | -2.371081 | -0.548097 |
| 20 | 1 | 0 | 4.625384  | -1.795638 | -1.187064 |
| 21 | 8 | 0 | 3.188660  | -3.380105 | 1.726598  |
| 22 | 1 | 0 | 3.886720  | -3.695943 | 1.142466  |
| 23 | 8 | 0 | 3.022775  | 1.970201  | 0.372034  |
| 24 | 1 | 0 | 2.564741  | 2.608731  | -0.193033 |
| 25 | 6 | 0 | -0.400713 | 3.957999  | 0.429471  |
| 26 | 1 | 0 | -1.345564 | 3.878161  | 0.982256  |
| 27 | 1 | 0 | 0.250143  | 4.643647  | 0.976479  |
| 28 | 1 | 0 | -0.617383 | 4.407007  | -0.542375 |
| 29 | 6 | 0 | -1.391025 | 0.944119  | -0.500864 |
| 30 | 6 | 0 | -2.239391 | 1.176362  | 0.579416  |
| 31 | 6 | 0 | -1.678979 | -0.103238 | -1.381743 |
| 32 | 6 | 0 | -3.362383 | 0.382847  | 0.784080  |
| 33 | 1 | 0 | -2.029596 | 1.973026  | 1.279084  |
| 34 | 6 | 0 | -2.793736 | -0.904031 | -1.194477 |
| 35 | 1 | 0 | -1.009715 | -0.288350 | -2.213653 |
| 36 | 6 | 0 | -3.617450 | -0.641181 | -0.109901 |
| 37 | 1 | 0 | -4.033489 | 0.542785  | 1.616652  |
| 38 | 1 | 0 | -3.035715 | -1.718869 | -1.862966 |
| 39 | 6 | 0 | -0.167232 | 1.817825  | -0.812992 |
| 40 | 1 | 0 | -0.417582 | 2.437884  | -1.678854 |
| 41 | 7 | 0 | -4.811395 | -1.488189 | 0.100134  |
| 42 | 8 | 0 | -5.515937 | -1.231364 | 1.050393  |
| 43 | 8 | 0 | -5.005345 | -2.381333 | -0.692967 |

-----

**Structure 43d (<sup>5</sup>C<sub>2</sub> ax-ax) (M06-2X, Gas Phase)**

Energy (Hartrees): = - 1181.3341041  
 No imaginary frequencies

Standard orientation:

| Center<br>Number | Atomic<br>Number | Atomic<br>Type | Coordinates (Angstroms) |           |           |
|------------------|------------------|----------------|-------------------------|-----------|-----------|
|                  |                  |                | X                       | Y         | Z         |
| 1                | 6                | 0              | 1.767504                | 1.243359  | 0.951073  |
| 2                | 6                | 0              | 0.552641                | 2.092061  | 1.338710  |
| 3                | 6                | 0              | 1.318487                | 0.240409  | -0.115615 |
| 4                | 1                | 0              | 0.862515                | 2.877716  | 2.029016  |
| 5                | 1                | 0              | -0.175948               | 1.454932  | 1.854936  |
| 6                | 1                | 0              | 2.147261                | 0.707714  | 1.823152  |
| 7                | 1                | 0              | 0.544005                | -0.404241 | 0.324737  |
| 8                | 8                | 0              | 0.767901                | 0.970119  | -1.213960 |
| 9                | 7                | 0              | -0.106284               | 2.712943  | 0.186564  |
| 10               | 6                | 0              | 2.398764                | -0.672393 | -0.702195 |
| 11               | 1                | 0              | 1.932516                | -1.184860 | -1.550854 |
| 12               | 6                | 0              | 2.875918                | -1.720715 | 0.302883  |
| 13               | 1                | 0              | 2.014500                | -2.199240 | 0.789858  |
| 14               | 6                | 0              | 3.706260                | -2.791144 | -0.385969 |
| 15               | 1                | 0              | 4.477679                | -2.300082 | -0.987364 |
| 16               | 1                | 0              | 3.067827                | -3.401281 | -1.034921 |
| 17               | 8                | 0              | 3.501742                | 0.032444  | -1.224564 |
| 18               | 1                | 0              | 3.987833                | 0.362434  | -0.456348 |
| 19               | 8                | 0              | 3.673748                | -1.051677 | 1.261009  |
| 20               | 1                | 0              | 4.222073                | -1.730038 | 1.672766  |
| 21               | 8                | 0              | 4.277744                | -3.571095 | 0.656155  |
| 22               | 1                | 0              | 4.993187                | -4.098667 | 0.297412  |
| 23               | 8                | 0              | 2.820612                | 2.067175  | 0.473186  |
| 24               | 1                | 0              | 2.704940                | 2.143359  | -0.481496 |
| 25               | 6                | 0              | 0.516885                | 3.935983  | -0.314042 |
| 26               | 1                | 0              | 1.405616                | 3.766781  | -0.933071 |
| 27               | 1                | 0              | -0.214865               | 4.490063  | -0.906952 |
| 28               | 1                | 0              | 0.810512                | 4.557190  | 0.531846  |
| 29               | 6                | 0              | -1.564463               | 0.857177  | -0.517426 |
| 30               | 6                | 0              | -2.554412               | 1.297004  | 0.359236  |
| 31               | 6                | 0              | -1.704527               | -0.378475 | -1.152344 |
| 32               | 6                | 0              | -3.669755               | 0.511027  | 0.615872  |
| 33               | 1                | 0              | -2.434069               | 2.260994  | 0.837721  |
| 34               | 6                | 0              | -2.812021               | -1.176246 | -0.907380 |
| 35               | 1                | 0              | -0.934439               | -0.709655 | -1.839183 |
| 36               | 6                | 0              | -3.774353               | -0.713847 | -0.022409 |
| 37               | 1                | 0              | -4.449603               | 0.827415  | 1.294697  |
| 38               | 1                | 0              | -2.944360               | -2.138125 | -1.383437 |
| 39               | 6                | 0              | -0.372631               | 1.752294  | -0.851166 |
| 40               | 1                | 0              | -0.617001               | 2.302308  | -1.763941 |
| 41               | 7                | 0              | -4.954977               | -1.560346 | 0.248714  |
| 42               | 8                | 0              | -5.778313               | -1.136498 | 1.028744  |

43            8            0            -5.023075    -2.624453    -0.325680

-----

**Structure 43d (<sup>5</sup>C<sub>2</sub> ec-ax) (M06-2X, Benzene)**

Energy (Hartrees): = - 1181.352537  
 No imaginary frequencies

Standard orientation:

| Center Number | Atomic Number | Atomic Type | Coordinates (Angstroms) |           |           |
|---------------|---------------|-------------|-------------------------|-----------|-----------|
|               |               |             | X                       | Y         | Z         |
| 1             | 6             | 0           | 1.986078                | 1.173475  | 0.919957  |
| 2             | 6             | 0           | 0.824162                | 2.047755  | 1.390752  |
| 3             | 6             | 0           | 1.486403                | 0.229114  | -0.180934 |
| 4             | 1             | 0           | 1.201498                | 2.798576  | 2.088184  |
| 5             | 1             | 0           | 0.076298                | 1.433044  | 1.912733  |
| 6             | 1             | 0           | 2.396672                | 0.606741  | 1.757243  |
| 7             | 1             | 0           | 0.707841                | -0.420229 | 0.245027  |
| 8             | 8             | 0           | 0.935209                | 1.006271  | -1.242366 |
| 9             | 7             | 0           | 0.314485                | 2.727254  | 0.209554  |
| 10            | 6             | 0           | 2.557631                | -0.664392 | -0.801519 |
| 11            | 1             | 0           | 2.075123                | -1.271249 | -1.575154 |
| 12            | 6             | 0           | 3.213637                | -1.614962 | 0.201472  |
| 13            | 1             | 0           | 3.718380                | -1.035542 | 0.988244  |
| 14            | 6             | 0           | 2.263771                | -2.610459 | 0.843000  |
| 15            | 1             | 0           | 1.680864                | -3.105155 | 0.052402  |
| 16            | 1             | 0           | 1.569627                | -2.109065 | 1.521664  |
| 17            | 8             | 0           | 3.580527                | 0.063286  | -1.459952 |
| 18            | 1             | 0           | 3.776517                | 0.829904  | -0.903342 |
| 19            | 8             | 0           | 4.175863                | -2.396286 | -0.489986 |
| 20            | 1             | 0           | 4.661851                | -1.783752 | -1.054920 |
| 21            | 8             | 0           | 2.978988                | -3.552066 | 1.611405  |
| 22            | 1             | 0           | 3.711584                | -3.841140 | 1.055903  |
| 23            | 8             | 0           | 3.025566                | 2.006939  | 0.420705  |
| 24            | 1             | 0           | 2.571463                | 2.647177  | -0.147263 |
| 25            | 6             | 0           | -0.373217               | 3.991881  | 0.383698  |
| 26            | 1             | 0           | -1.326506               | 3.935626  | 0.924977  |
| 27            | 1             | 0           | 0.280304                | 4.675999  | 0.930125  |
| 28            | 1             | 0           | -0.569025               | 4.430248  | -0.597666 |
| 29            | 6             | 0           | -1.366881               | 0.960066  | -0.526529 |
| 30            | 6             | 0           | -2.235565               | 1.222755  | 0.531036  |
| 31            | 6             | 0           | -1.635919               | -0.115813 | -1.378810 |
| 32            | 6             | 0           | -3.357705               | 0.431066  | 0.742881  |
| 33            | 1             | 0           | -2.040617               | 2.040946  | 1.209868  |
| 34            | 6             | 0           | -2.749140               | -0.917072 | -1.183358 |
| 35            | 1             | 0           | -0.956891               | -0.326306 | -2.196655 |
| 36            | 6             | 0           | -3.592403               | -0.624529 | -0.120705 |
| 37            | 1             | 0           | -4.038966               | 0.619662  | 1.561123  |
| 38            | 1             | 0           | -2.969340               | -1.753733 | -1.832477 |
| 39            | 6             | 0           | -0.139506               | 1.833375  | -0.830633 |
| 40            | 1             | 0           | -0.378903               | 2.446198  | -1.704314 |
| 41            | 7             | 0           | -4.781021               | -1.471206 | 0.099896  |
| 42            | 8             | 0           | -5.513300               | -1.182615 | 1.021466  |
| 43            | 8             | 0           | -4.954117               | -2.403510 | -0.654237 |

**Structure 43d (<sup>5</sup>C<sub>2</sub> ax-ax) (M06-2X, Benzene)**

Energy (Hartrees): = - 1181.3558766  
 No imaginary frequencies

Standard orientation:

| Center Number | Atomic Number | Atomic Type | Coordinates (Angstroms) |           |           |
|---------------|---------------|-------------|-------------------------|-----------|-----------|
|               |               |             | X                       | Y         | Z         |
| 1             | 6             | 0           | 1.759803                | 1.235976  | 0.955793  |
| 2             | 6             | 0           | 0.542978                | 2.083165  | 1.338589  |
| 3             | 6             | 0           | 1.319274                | 0.231243  | -0.112646 |
| 4             | 1             | 0           | 0.848234                | 2.870559  | 2.029056  |
| 5             | 1             | 0           | -0.183448               | 1.444042  | 1.854945  |
| 6             | 1             | 0           | 2.134233                | 0.700945  | 1.830356  |
| 7             | 1             | 0           | 0.552505                | -0.421226 | 0.328362  |
| 8             | 8             | 0           | 0.761715                | 0.955648  | -1.212112 |
| 9             | 7             | 0           | -0.114517               | 2.700028  | 0.183494  |
| 10            | 6             | 0           | 2.406896                | -0.672424 | -0.700079 |
| 11            | 1             | 0           | 1.940275                | -1.205984 | -1.535063 |
| 12            | 6             | 0           | 2.914397                | -1.700322 | 0.311565  |
| 13            | 1             | 0           | 2.066553                | -2.171671 | 0.827707  |
| 14            | 6             | 0           | 3.731070                | -2.779677 | -0.378202 |
| 15            | 1             | 0           | 4.490260                | -2.300993 | -1.004861 |
| 16            | 1             | 0           | 3.081145                | -3.401598 | -1.004004 |
| 17            | 8             | 0           | 3.492754                | 0.045307  | -1.244702 |
| 18            | 1             | 0           | 3.990401                | 0.374110  | -0.483451 |

|    |   |   |           |           |           |
|----|---|---|-----------|-----------|-----------|
| 19 | 8 | 0 | 3.735211  | -1.011745 | 1.239076  |
| 20 | 1 | 0 | 4.303637  | -1.681926 | 1.638082  |
| 21 | 8 | 0 | 4.329355  | -3.544508 | 0.661285  |
| 22 | 1 | 0 | 5.048943  | -4.061264 | 0.291322  |
| 23 | 8 | 0 | 2.817921  | 2.061125  | 0.485980  |
| 24 | 1 | 0 | 2.690527  | 2.161876  | -0.465071 |
| 25 | 6 | 0 | 0.502387  | 3.924679  | -0.319484 |
| 26 | 1 | 0 | 1.391702  | 3.761897  | -0.940573 |
| 27 | 1 | 0 | -0.231347 | 4.473922  | -0.915040 |
| 28 | 1 | 0 | 0.791088  | 4.552131  | 0.524156  |
| 29 | 6 | 0 | -1.575467 | 0.845386  | -0.520358 |
| 30 | 6 | 0 | -2.573262 | 1.297085  | 0.342342  |
| 31 | 6 | 0 | -1.713926 | -0.396940 | -1.143142 |
| 32 | 6 | 0 | -3.691321 | 0.516328  | 0.600466  |
| 33 | 1 | 0 | -2.459229 | 2.265786  | 0.812854  |
| 34 | 6 | 0 | -2.824643 | -1.190008 | -0.897628 |
| 35 | 1 | 0 | -0.942543 | -0.740956 | -1.821933 |
| 36 | 6 | 0 | -3.792757 | -0.716820 | -0.023844 |
| 37 | 1 | 0 | -4.471717 | 0.847348  | 1.271814  |
| 38 | 1 | 0 | -2.949369 | -2.156093 | -1.367718 |
| 39 | 6 | 0 | -0.380311 | 1.737711  | -0.852776 |
| 40 | 1 | 0 | -0.624435 | 2.286671  | -1.766218 |
| 41 | 7 | 0 | -4.970648 | -1.559835 | 0.254474  |
| 42 | 8 | 0 | -5.784315 | -1.144734 | 1.051141  |
| 43 | 8 | 0 | -5.055387 | -2.619996 | -0.327425 |

### Structure 43d (<sup>5</sup>C<sub>2</sub> ec-ax) (M06-2X, DMSO)

Energy (Hartrees): = - 1181.3592506  
No imaginary frequencies

Standard orientation:

| Center<br>Number | Atomic<br>Number | Atomic<br>Type | Coordinates (Angstroms) |           |           |
|------------------|------------------|----------------|-------------------------|-----------|-----------|
|                  |                  |                | X                       | Y         | Z         |
| 1                | 6                | 0              | 1.991416                | 1.176177  | 0.911186  |
| 2                | 6                | 0              | 0.830926                | 2.048438  | 1.382069  |
| 3                | 6                | 0              | 1.486714                | 0.227752  | -0.182402 |
| 4                | 1                | 0              | 1.202939                | 2.802096  | 2.079375  |
| 5                | 1                | 0              | 0.083010                | 1.433032  | 1.901882  |
| 6                | 1                | 0              | 2.407323                | 0.612474  | 1.747308  |
| 7                | 1                | 0              | 0.713076                | -0.419581 | 0.253532  |
| 8                | 8                | 0              | 0.929715                | 0.999100  | -1.247372 |
| 9                | 7                | 0              | 0.318421                | 2.726335  | 0.199735  |
| 10               | 6                | 0              | 2.555342                | -0.666191 | -0.803501 |
| 11               | 1                | 0              | 2.070336                | -1.284809 | -1.565965 |
| 12               | 6                | 0              | 3.227135                | -1.601615 | 0.201897  |
| 13               | 1                | 0              | 3.736060                | -1.011100 | 0.976401  |
| 14               | 6                | 0              | 2.286544                | -2.591322 | 0.862080  |
| 15               | 1                | 0              | 1.690556                | -3.090731 | 0.085201  |
| 16               | 1                | 0              | 1.606895                | -2.081228 | 1.547535  |
| 17               | 8                | 0              | 3.571615                | 0.066941  | -1.474027 |
| 18               | 1                | 0              | 3.739174                | 0.850208  | -0.929876 |
| 19               | 8                | 0              | 4.190206                | -2.385610 | -0.493210 |
| 20               | 1                | 0              | 4.679434                | -1.767494 | -1.049803 |
| 21               | 8                | 0              | 3.016144                | -3.535091 | 1.624970  |
| 22               | 1                | 0              | 3.741970                | -3.819991 | 1.058130  |
| 23               | 8                | 0              | 3.026476                | 2.014672  | 0.397510  |
| 24               | 1                | 0              | 2.554996                | 2.669549  | -0.140621 |
| 25               | 6                | 0              | -0.398698               | 3.973109  | 0.402374  |
| 26               | 1                | 0              | -1.267994               | 3.897967  | 1.066735  |
| 27               | 1                | 0              | 0.285521                | 4.709465  | 0.831736  |
| 28               | 1                | 0              | -0.739739               | 4.350301  | -0.564108 |
| 29               | 6                | 0              | -1.368520               | 0.950268  | -0.518862 |
| 30               | 6                | 0              | -2.240836               | 1.218135  | 0.534806  |
| 31               | 6                | 0              | -1.635259               | -0.129091 | -1.368252 |
| 32               | 6                | 0              | -3.365060               | 0.428400  | 0.743541  |
| 33               | 1                | 0              | -2.051677               | 2.037297  | 1.213960  |
| 34               | 6                | 0              | -2.750159               | -0.928334 | -1.176753 |
| 35               | 1                | 0              | -0.956189               | -0.345515 | -2.184247 |
| 36               | 6                | 0              | -3.598172               | -0.629825 | -0.118581 |
| 37               | 1                | 0              | -4.044832               | 0.626467  | 1.560893  |
| 38               | 1                | 0              | -2.963507               | -1.764109 | -1.829457 |
| 39               | 6                | 0              | -0.145820               | 1.826695  | -0.830871 |
| 40               | 1                | 0              | -0.397660               | 2.434696  | -1.704081 |
| 41               | 7                | 0              | -4.787116               | -1.470956 | 0.096988  |
| 42               | 8                | 0              | -5.532121               | -1.178786 | 1.009544  |
| 43               | 8                | 0              | -4.959804               | -2.411503 | -0.650412 |

### Structure 43d (<sup>5</sup>C<sub>2</sub> ax-ax) (M06-2X, DMSO)

Energy (Hartrees): = - 1181.3606539  
No imaginary frequencies

Standard orientation:

| Center<br>Number | Atomic<br>Number | Atomic<br>Type | Coordinates (Angstroms) |           |           |
|------------------|------------------|----------------|-------------------------|-----------|-----------|
|                  |                  |                | X                       | Y         | Z         |
| 1                | 6                | 0              | 1.767401                | 1.227970  | 0.951907  |
| 2                | 6                | 0              | 0.560080                | 2.084691  | 1.342635  |
| 3                | 6                | 0              | 1.312343                | 0.231908  | -0.115676 |
| 4                | 1                | 0              | 0.871587                | 2.869818  | 2.033261  |
| 5                | 1                | 0              | -0.164735               | 1.445107  | 1.860301  |
| 6                | 1                | 0              | 2.135815                | 0.686344  | 1.825222  |
| 7                | 1                | 0              | 0.541371                | -0.411586 | 0.328810  |
| 8                | 8                | 0              | 0.759984                | 0.966639  | -1.212558 |
| 9                | 7                | 0              | -0.103802               | 2.707544  | 0.192609  |
| 10               | 6                | 0              | 2.382965                | -0.688793 | -0.700100 |
| 11               | 1                | 0              | 1.895821                | -1.257573 | -1.498677 |
| 12               | 6                | 0              | 2.919998                | -1.676611 | 0.337700  |
| 13               | 1                | 0              | 2.090569                | -2.074117 | 0.937393  |
| 14               | 6                | 0              | 3.638961                | -2.828097 | -0.342059 |
| 15               | 1                | 0              | 4.360211                | -2.424518 | -1.059981 |
| 16               | 1                | 0              | 2.915948                | -3.458290 | -0.870647 |
| 17               | 8                | 0              | 3.454443                | 0.012774  | -1.299894 |
| 18               | 1                | 0              | 3.985764                | 0.335652  | -0.559391 |
| 19               | 8                | 0              | 3.833886                | -0.975829 | 1.169583  |
| 20               | 1                | 0              | 4.422422                | -1.650502 | 1.531736  |
| 21               | 8                | 0              | 4.300199                | -3.554231 | 0.688993  |
| 22               | 1                | 0              | 4.978915                | -4.103743 | 0.285907  |
| 23               | 8                | 0              | 2.838478                | 2.040559  | 0.481682  |
| 24               | 1                | 0              | 2.690491                | 2.168462  | -0.463397 |
| 25               | 6                | 0              | 0.525897                | 3.924209  | -0.317023 |
| 26               | 1                | 0              | 1.414910                | 3.749410  | -0.935885 |
| 27               | 1                | 0              | -0.200246               | 4.473767  | -0.921345 |
| 28               | 1                | 0              | 0.815802                | 4.554681  | 0.524476  |
| 29               | 6                | 0              | -1.572187               | 0.853796  | -0.508294 |
| 30               | 6                | 0              | -2.573564               | 1.304931  | 0.350853  |
| 31               | 6                | 0              | -1.704384               | -0.392322 | -1.125698 |
| 32               | 6                | 0              | -3.691754               | 0.523424  | 0.605774  |
| 33               | 1                | 0              | -2.469231               | 2.273252  | 0.823857  |
| 34               | 6                | 0              | -2.814881               | -1.186744 | -0.884358 |
| 35               | 1                | 0              | -0.928723               | -0.743819 | -1.795703 |
| 36               | 6                | 0              | -3.789136               | -0.711058 | -0.017869 |
| 37               | 1                | 0              | -4.472390               | 0.860939  | 1.273787  |
| 38               | 1                | 0              | -2.927440               | -2.154563 | -1.354219 |
| 39               | 6                | 0              | -0.379973               | 1.747618  | -0.844730 |
| 40               | 1                | 0              | -0.634104               | 2.299833  | -1.753415 |
| 41               | 7                | 0              | -4.969146               | -1.548873 | 0.250272  |
| 42               | 8                | 0              | -5.788350               | -1.137917 | 1.046133  |
| 43               | 8                | 0              | -5.061479               | -2.606842 | -0.337767 |

**Structure 44a (<sup>2</sup>E ec-ax H-bond O) (M06-2X, Gas Phase)**

Energy (Hartrees): = - 976.8505209  
 No imaginary frequencies

Standard orientation:

| Center<br>Number | Atomic<br>Number | Atomic<br>Type | Coordinates (Angstroms) |           |           |
|------------------|------------------|----------------|-------------------------|-----------|-----------|
|                  |                  |                | X                       | Y         | Z         |
| 1                | 6                | 0              | -3.058359               | -0.180968 | 0.356184  |
| 2                | 6                | 0              | -3.230090               | -0.899043 | -0.825494 |
| 3                | 6                | 0              | -4.495492               | -1.038281 | -1.385748 |
| 4                | 6                | 0              | -5.602348               | -0.469074 | -0.765503 |
| 5                | 6                | 0              | -5.441100               | 0.233033  | 0.424176  |
| 6                | 6                | 0              | -4.175145               | 0.371502  | 0.980876  |
| 7                | 1                | 0              | -2.373120               | -1.372095 | -1.290287 |
| 8                | 1                | 0              | -4.618762               | -1.599780 | -2.304288 |
| 9                | 1                | 0              | -6.587985               | -0.582277 | -1.201116 |
| 10               | 1                | 0              | -6.301125               | 0.665865  | 0.921179  |
| 11               | 1                | 0              | -4.052838               | 0.909270  | 1.916435  |
| 12               | 6                | 0              | -1.679103               | 0.053285  | 0.950758  |
| 13               | 1                | 0              | -1.761159               | 0.092969  | 2.042367  |
| 14               | 7                | 0              | -0.996201               | 1.259502  | 0.481381  |
| 15               | 8                | 0              | -0.796086               | -0.995157 | 0.587783  |
| 16               | 6                | 0              | 0.158611                | -0.517769 | -0.378243 |
| 17               | 6                | 0              | -0.357223               | 0.862676  | -0.764572 |
| 18               | 1                | 0              | 0.454191                | 1.542346  | -1.023922 |
| 19               | 1                | 0              | -1.067844               | 0.800474  | -1.604182 |
| 20               | 1                | 0              | 0.168834                | -1.229366 | -1.209710 |
| 21               | 6                | 0              | 1.525411                | -0.499066 | 0.300651  |
| 22               | 1                | 0              | 1.555708                | 0.352382  | 0.992693  |
| 23               | 6                | 0              | 2.688685                | -0.355826 | -0.683439 |
| 24               | 1                | 0              | 2.522145                | -1.038963 | -1.527927 |
| 25               | 6                | 0              | 4.009979                | -0.788488 | -0.014473 |

|    |   |   |           |           |           |
|----|---|---|-----------|-----------|-----------|
| 26 | 1 | 0 | 4.078888  | -1.877734 | -0.096869 |
| 27 | 6 | 0 | 5.228462  | -0.149700 | -0.669568 |
| 28 | 1 | 0 | 6.134918  | -0.666036 | -0.339190 |
| 29 | 1 | 0 | 5.161715  | -0.204058 | -1.757126 |
| 30 | 8 | 0 | 1.709512  | -1.721615 | 1.005925  |
| 31 | 1 | 0 | 0.855268  | -1.930779 | 1.403123  |
| 32 | 8 | 0 | 2.699456  | 0.961505  | -1.200670 |
| 33 | 1 | 0 | 3.488999  | 1.416790  | -0.876345 |
| 34 | 8 | 0 | 4.085146  | -0.397673 | 1.349291  |
| 35 | 1 | 0 | 3.413914  | -0.909865 | 1.816180  |
| 36 | 8 | 0 | 5.290843  | 1.228287  | -0.322923 |
| 37 | 1 | 0 | 5.232261  | 1.253658  | 0.640047  |
| 38 | 6 | 0 | -1.786967 | 2.470935  | 0.405250  |
| 39 | 1 | 0 | -2.227728 | 2.684694  | 1.381930  |
| 40 | 1 | 0 | -1.128161 | 3.300410  | 0.143522  |
| 41 | 1 | 0 | -2.597598 | 2.413517  | -0.336573 |

-----  
**Structure 44a (<sup>2</sup>E ec-ax H-bond N) (M06-2X, Gas Phase)**

Energy (Hartrees): = - 976.8529803  
 No imaginary frequencies

Standard orientation:

| Center<br>Number | Atomic<br>Number | Atomic<br>Type | Coordinates (Angstroms) |           |           |
|------------------|------------------|----------------|-------------------------|-----------|-----------|
|                  |                  |                | X                       | Y         | Z         |
| 1                | 6                | 0              | 2.844343                | -0.227856 | -0.450372 |
| 2                | 6                | 0              | 3.049463                | -1.282372 | 0.436996  |
| 3                | 6                | 0              | 4.323511                | -1.810881 | 0.614686  |
| 4                | 6                | 0              | 5.400254                | -1.297185 | -0.099736 |
| 5                | 6                | 0              | 5.198150                | -0.258495 | -1.002505 |
| 6                | 6                | 0              | 3.924227                | 0.269132  | -1.177477 |
| 7                | 1                | 0              | 2.201684                | -1.707221 | 0.961230  |
| 8                | 1                | 0              | 4.473651                | -2.632973 | 1.304309  |
| 9                | 1                | 0              | 6.391049                | -1.714427 | 0.035346  |
| 10               | 1                | 0              | 6.029658                | 0.132974  | -1.576329 |
| 11               | 1                | 0              | 3.765093                | 1.069530  | -1.894006 |
| 12               | 6                | 0              | 1.475014                | 0.407979  | -0.607257 |
| 13               | 1                | 0              | 1.355586                | 0.772731  | -1.633701 |
| 14               | 7                | 0              | 1.212109                | 1.533396  | 0.315531  |
| 15               | 8                | 0              | 0.456512                | -0.522021 | -0.315792 |
| 16               | 6                | 0              | -0.252862               | -0.133042 | 0.866592  |
| 17               | 6                | 0              | 0.671767                | 0.893843  | 1.513704  |
| 18               | 1                | 0              | 0.133753                | 1.621747  | 2.125351  |
| 19               | 1                | 0              | 1.453910                | 0.419443  | 2.124573  |
| 20               | 1                | 0              | -0.420308               | -1.022760 | 1.476359  |
| 21               | 6                | 0              | -1.611917               | 0.448876  | 0.493534  |
| 22               | 1                | 0              | -2.123209               | 0.725796  | 1.426606  |
| 23               | 6                | 0              | -2.482901               | -0.606880 | -0.188192 |
| 24               | 1                | 0              | -1.888071               | -1.095310 | -0.968515 |
| 25               | 6                | 0              | -3.693598               | 0.053931  | -0.873413 |
| 26               | 1                | 0              | -3.372390               | 0.376375  | -1.868777 |
| 27               | 6                | 0              | -4.877538               | -0.896429 | -1.000655 |
| 28               | 1                | 0              | -5.607699               | -0.483208 | -1.703364 |
| 29               | 1                | 0              | -4.554267               | -1.876321 | -1.354199 |
| 30               | 8                | 0              | -1.501813               | 1.581256  | -0.357477 |
| 31               | 1                | 0              | -0.598621               | 1.934202  | -0.279056 |
| 32               | 8                | 0              | -2.807477               | -1.590472 | 0.778423  |
| 33               | 1                | 0              | -3.748908               | -1.522142 | 0.985830  |
| 34               | 8                | 0              | -4.199578               | 1.167075  | -0.145438 |
| 35               | 1                | 0              | -3.516056               | 1.847395  | -0.173601 |
| 36               | 8                | 0              | -5.475811               | -1.088618 | 0.275636  |
| 37               | 1                | 0              | -5.644047               | -0.201062 | 0.614603  |
| 38               | 6                | 0              | 2.307658                | 2.457502  | 0.553292  |
| 39               | 1                | 0              | 2.661675                | 2.861405  | -0.397253 |
| 40               | 1                | 0              | 1.939458                | 3.287173  | 1.158930  |
| 41               | 1                | 0              | 3.155214                | 1.986389  | 1.068933  |

-----  
**Structure 44a (<sup>2</sup>E ec-ec) (M06-2X, Gas Phase)**

Energy (Hartrees): = - 976.8524799  
 No imaginary frequencies

Standard orientation:

| Center<br>Number | Atomic<br>Number | Atomic<br>Type | Coordinates (Angstroms) |           |           |
|------------------|------------------|----------------|-------------------------|-----------|-----------|
|                  |                  |                | X                       | Y         | Z         |
| 1                | 6                | 0              | -3.135013               | -0.128470 | 0.242357  |
| 2                | 6                | 0              | -3.649812               | -0.242935 | -1.048418 |
| 3                | 6                | 0              | -4.967763               | -0.631227 | -1.237499 |
| 4                | 6                | 0              | -5.780238               | -0.906339 | -0.138405 |
| 5                | 6                | 0              | -5.270286               | -0.792324 | 1.148036  |
| 6                | 6                | 0              | -3.945841               | -0.404233 | 1.335996  |

|    |   |   |           |           |           |
|----|---|---|-----------|-----------|-----------|
| 7  | 1 | 0 | -3.004865 | -0.011671 | -1.888132 |
| 8  | 1 | 0 | -5.367913 | -0.719737 | -2.240655 |
| 9  | 1 | 0 | -6.809980 | -1.208316 | -0.288726 |
| 10 | 1 | 0 | -5.899192 | -1.006404 | 2.003925  |
| 11 | 1 | 0 | -3.540806 | -0.314422 | 2.338843  |
| 12 | 6 | 0 | -1.705109 | 0.303100  | 0.429449  |
| 13 | 1 | 0 | -1.477641 | 0.378373  | 1.512055  |
| 14 | 7 | 0 | -1.396740 | 1.548867  | -0.251101 |
| 15 | 8 | 0 | -0.816813 | -0.633514 | -0.162783 |
| 16 | 6 | 0 | 0.322573  | 0.075385  | -0.674066 |
| 17 | 6 | 0 | 0.058045  | 1.535631  | -0.314744 |
| 18 | 1 | 0 | 0.518113  | 1.782049  | 0.656446  |
| 19 | 1 | 0 | 0.442115  | 2.233042  | -1.058760 |
| 20 | 1 | 0 | 0.344055  | -0.077949 | -1.758277 |
| 21 | 6 | 0 | 1.564224  | -0.540313 | -0.055580 |
| 22 | 1 | 0 | 1.576623  | -0.310147 | 1.018466  |
| 23 | 6 | 0 | 2.851652  | 0.007442  | -0.666349 |
| 24 | 1 | 0 | 2.753258  | -0.003486 | -1.760539 |
| 25 | 6 | 0 | 4.046590  | -0.900601 | -0.314632 |
| 26 | 1 | 0 | 4.068147  | -1.714483 | -1.046508 |
| 27 | 6 | 0 | 5.371830  | -0.150124 | -0.345952 |
| 28 | 1 | 0 | 6.199837  | -0.865332 | -0.336703 |
| 29 | 1 | 0 | 5.446400  | 0.472954  | -1.238310 |
| 30 | 8 | 0 | 1.544504  | -1.948599 | -0.254014 |
| 31 | 1 | 0 | 0.640149  | -2.235265 | -0.078900 |
| 32 | 8 | 0 | 2.992396  | 1.358127  | -0.268483 |
| 33 | 1 | 0 | 3.749957  | 1.429427  | 0.328866  |
| 34 | 8 | 0 | 3.960259  | -1.432629 | 1.000199  |
| 35 | 1 | 0 | 3.212387  | -2.041672 | 1.000511  |
| 36 | 8 | 0 | 5.456189  | 0.717725  | 0.777817  |
| 37 | 1 | 0 | 5.284615  | 0.161008  | 1.546983  |
| 38 | 6 | 0 | -1.951931 | 2.715715  | 0.405606  |
| 39 | 1 | 0 | -1.575847 | 2.831409  | 1.436453  |
| 40 | 1 | 0 | -1.687873 | 3.609530  | -0.161012 |
| 41 | 1 | 0 | -3.040157 | 2.635892  | 0.434991  |

#### Structure 44a (E2 ax-ax) (M06-2X, Gas Phase)

Energy (Hartrees): = - 976.8527004  
 No imaginary frequencies

Standard orientation:

| Center<br>Number | Atomic<br>Number | Atomic<br>Type | Coordinates (Angstroms) |           |           |
|------------------|------------------|----------------|-------------------------|-----------|-----------|
|                  |                  |                | X                       | Y         | Z         |
| 1                | 6                | 0              | -3.078101               | 0.062927  | 0.263931  |
| 2                | 6                | 0              | -3.271391               | -1.297752 | 0.489153  |
| 3                | 6                | 0              | -4.342469               | -1.959832 | -0.102327 |
| 4                | 6                | 0              | -5.227179               | -1.265973 | -0.919899 |
| 5                | 6                | 0              | -5.035329               | 0.093265  | -1.147205 |
| 6                | 6                | 0              | -3.964314               | 0.755488  | -0.558929 |
| 7                | 1                | 0              | -2.574459               | -1.832076 | 1.123682  |
| 8                | 1                | 0              | -4.484493               | -3.019559 | 0.074471  |
| 9                | 1                | 0              | -6.060171               | -1.782178 | -1.382342 |
| 10               | 1                | 0              | -5.718210               | 0.638015  | -1.788501 |
| 11               | 1                | 0              | -3.790702               | 1.808842  | -0.744220 |
| 12               | 6                | 0              | -1.932230               | 0.802573  | 0.937894  |
| 13               | 1                | 0              | -2.267588               | 1.251621  | 1.875865  |
| 14               | 7                | 0              | -1.355602               | 1.800670  | 0.068559  |
| 15               | 8                | 0              | -0.867789               | -0.100026 | 1.263613  |
| 16               | 6                | 0              | -0.053918               | -0.210342 | 0.088780  |
| 17               | 6                | 0              | -0.487011               | 0.989554  | -0.797912 |
| 18               | 1                | 0              | 0.364606                | 1.564020  | -1.156643 |
| 19               | 1                | 0              | -1.061673               | 0.633222  | -1.653944 |
| 20               | 1                | 0              | -0.268366               | -1.168500 | -0.399584 |
| 21               | 6                | 0              | 1.393758                | -0.205252 | 0.556478  |
| 22               | 1                | 0              | 1.656870                | 0.798829  | 0.914813  |
| 23               | 6                | 0              | 2.381678                | -0.559428 | -0.556938 |
| 24               | 1                | 0              | 1.988298                | -1.415116 | -1.124480 |
| 25               | 6                | 0              | 3.726085                | -1.008011 | 0.043751  |
| 26               | 1                | 0              | 3.614691                | -2.053131 | 0.349098  |
| 27               | 6                | 0              | 4.875563                | -0.888505 | -0.949100 |
| 28               | 1                | 0              | 5.742995                | -1.440478 | -0.574714 |
| 29               | 1                | 0              | 4.592809                | -1.287557 | -1.924583 |
| 30               | 8                | 0              | 1.551519                | -1.156582 | 1.603686  |
| 31               | 1                | 0              | 0.777205                | -1.063185 | 2.170747  |
| 32               | 8                | 0              | 2.470620                | 0.546760  | -1.435435 |
| 33               | 1                | 0              | 3.388013                | 0.852978  | -1.463334 |
| 34               | 8                | 0              | 4.116579                | -0.212759 | 1.154056  |
| 35               | 1                | 0              | 3.497942                | -0.416995 | 1.864539  |
| 36               | 8                | 0              | 5.206936                | 0.481785  | -1.138876 |
| 37               | 1                | 0              | 5.347652                | 0.838013  | -0.253075 |
| 38               | 6                | 0              | -0.615433               | 2.814233  | 0.820741  |
| 39               | 1                | 0              | -0.114718               | 3.480929  | 0.118615  |
| 40               | 1                | 0              | -1.318426               | 3.408234  | 1.407327  |



41 1 0 0.135759 2.388293 1.499491

-----  
**Structure 44a (<sup>2</sup>E ec-ax H-bond O) (M06-2X, Benzene)**

Energy (Hartrees): = - 976.8692297  
No imaginary frequencies

Standard orientation:

-----

| Center<br>Number | Atomic<br>Number | Atomic<br>Type | Coordinates (Angstroms) |           |           |
|------------------|------------------|----------------|-------------------------|-----------|-----------|
|                  |                  |                | X                       | Y         | Z         |
| 1                | 6                | 0              | 3.061802                | -0.181209 | -0.355267 |
| 2                | 6                | 0              | 3.225064                | -0.903467 | 0.825721  |
| 3                | 6                | 0              | 4.487665                | -1.050594 | 1.391402  |
| 4                | 6                | 0              | 5.600092                | -0.483340 | 0.778493  |
| 5                | 6                | 0              | 5.447011                | 0.224212  | -0.409414 |
| 6                | 6                | 0              | 4.184118                | 0.370374  | -0.972198 |
| 7                | 1                | 0              | 2.364351                | -1.371815 | 1.289038  |
| 8                | 1                | 0              | 4.604040                | -1.615301 | 2.309224  |
| 9                | 1                | 0              | 6.583345                | -0.601712 | 1.218853  |
| 10               | 1                | 0              | 6.311179                | 0.656740  | -0.900117 |
| 11               | 1                | 0              | 4.069073                | 0.912523  | -1.906150 |
| 12               | 6                | 0              | 1.686302                | 0.062043  | -0.956440 |
| 13               | 1                | 0              | 1.774696                | 0.107358  | -2.046905 |
| 14               | 7                | 0              | 1.003954                | 1.266989  | -0.482525 |
| 15               | 8                | 0              | 0.796467                | -0.985680 | -0.604286 |
| 16               | 6                | 0              | -0.156473               | -0.513656 | 0.367597  |
| 17               | 6                | 0              | 0.362008                | 0.864274  | 0.760374  |
| 18               | 1                | 0              | -0.447206               | 1.545836  | 1.021349  |
| 19               | 1                | 0              | 1.069910                | 0.798121  | 1.601149  |
| 20               | 1                | 0              | -0.165368               | -1.228846 | 1.195562  |
| 21               | 6                | 0              | -1.525312               | -0.486952 | -0.309905 |
| 22               | 1                | 0              | -1.559548               | 0.378263  | -0.984671 |
| 23               | 6                | 0              | -2.690581               | -0.372062 | 0.676433  |
| 24               | 1                | 0              | -2.523970               | -1.075514 | 1.503495  |
| 25               | 6                | 0              | -4.011408               | -0.789142 | -0.003343 |
| 26               | 1                | 0              | -4.080697               | -1.879902 | 0.051744  |
| 27               | 6                | 0              | -5.233254               | -0.176792 | 0.667973  |
| 28               | 1                | 0              | -6.136720               | -0.684140 | 0.315816  |
| 29               | 1                | 0              | -5.174735               | -0.272767 | 1.753231  |
| 30               | 8                | 0              | -1.705866               | -1.694551 | -1.042563 |
| 31               | 1                | 0              | -0.854164               | -1.884484 | -1.455389 |
| 32               | 8                | 0              | -2.706722               | 0.934444  | 1.226035  |
| 33               | 1                | 0              | -3.499845               | 1.389682  | 0.910705  |
| 34               | 8                | 0              | -4.086871               | -0.362629 | -1.357921 |
| 35               | 1                | 0              | -3.409346               | -0.856787 | -1.835782 |
| 36               | 8                | 0              | -5.303652               | 1.215037  | 0.371122  |
| 37               | 1                | 0              | -5.257009               | 1.276882  | -0.591155 |
| 38               | 6                | 0              | 1.793756                | 2.478829  | -0.401407 |
| 39               | 1                | 0              | 2.240547                | 2.694777  | -1.375053 |
| 40               | 1                | 0              | 1.133612                | 3.309186  | -0.143582 |
| 41               | 1                | 0              | 2.598598                | 2.424887  | 0.347099  |

-----

**Structure 44a (<sup>2</sup>E ec-ax H-bond N) (M06-2X, Benzene)**

Energy (Hartrees): = - 976.8727179  
No imaginary frequencies

Standard orientation:

-----

| Center<br>Number | Atomic<br>Number | Atomic<br>Type | Coordinates (Angstroms) |           |           |
|------------------|------------------|----------------|-------------------------|-----------|-----------|
|                  |                  |                | X                       | Y         | Z         |
| 1                | 6                | 0              | 2.844955                | -0.234899 | -0.444579 |
| 2                | 6                | 0              | 3.079966                | -1.261163 | 0.469085  |
| 3                | 6                | 0              | 4.362444                | -1.774600 | 0.632748  |
| 4                | 6                | 0              | 5.418104                | -1.274724 | -0.122546 |
| 5                | 6                | 0              | 5.186414                | -0.263735 | -1.049870 |
| 6                | 6                | 0              | 3.904270                | 0.249607  | -1.210453 |
| 7                | 1                | 0              | 2.250515                | -1.675519 | 1.030239  |
| 8                | 1                | 0              | 4.534751                | -2.574686 | 1.343319  |
| 9                | 1                | 0              | 6.415334                | -1.680649 | 0.001275  |
| 10               | 1                | 0              | 6.001411                | 0.117540  | -1.654023 |
| 11               | 1                | 0              | 3.723311                | 1.029953  | -1.943892 |
| 12               | 6                | 0              | 1.468078                | 0.387612  | -0.591191 |
| 13               | 1                | 0              | 1.334768                | 0.736702  | -1.621188 |
| 14               | 7                | 0              | 1.203578                | 1.521594  | 0.317938  |
| 15               | 8                | 0              | 0.460009                | -0.549861 | -0.275041 |
| 16               | 6                | 0              | -0.254626               | -0.137235 | 0.897244  |
| 17               | 6                | 0              | 0.668421                | 0.900660  | 1.528329  |
| 18               | 1                | 0              | 0.130854                | 1.638163  | 2.128736  |
| 19               | 1                | 0              | 1.450993                | 0.436974  | 2.145974  |
| 20               | 1                | 0              | -0.422321               | -1.014150 | 1.524830  |
| 21               | 6                | 0              | -1.611563               | 0.442390  | 0.508754  |

-----

|    |   |   |           |           |           |
|----|---|---|-----------|-----------|-----------|
| 22 | 1 | 0 | -2.125805 | 0.730184  | 1.436692  |
| 23 | 6 | 0 | -2.485619 | -0.611898 | -0.172733 |
| 24 | 1 | 0 | -1.889343 | -1.115546 | -0.941973 |
| 25 | 6 | 0 | -3.682480 | 0.051701  | -0.879351 |
| 26 | 1 | 0 | -3.345313 | 0.365992  | -1.871860 |
| 27 | 6 | 0 | -4.870345 | -0.889174 | -1.025473 |
| 28 | 1 | 0 | -5.588707 | -0.468178 | -1.735802 |
| 29 | 1 | 0 | -4.552143 | -1.869259 | -1.383747 |
| 30 | 8 | 0 | -1.490428 | 1.568994  | -0.350526 |
| 31 | 1 | 0 | -0.581473 | 1.911885  | -0.268936 |
| 32 | 8 | 0 | -2.835533 | -1.583960 | 0.800300  |
| 33 | 1 | 0 | -3.780528 | -1.503054 | 0.985452  |
| 34 | 8 | 0 | -4.192170 | 1.172892  | -0.163710 |
| 35 | 1 | 0 | -3.497954 | 1.843130  | -0.178095 |
| 36 | 8 | 0 | -5.491585 | -1.085519 | 0.242050  |
| 37 | 1 | 0 | -5.671694 | -0.199344 | 0.579355  |
| 38 | 6 | 0 | 2.288210  | 2.463381  | 0.531024  |
| 39 | 1 | 0 | 2.627943  | 2.858927  | -0.428411 |
| 40 | 1 | 0 | 1.914173  | 3.297670  | 1.127214  |
| 41 | 1 | 0 | 3.146455  | 2.014194  | 1.048775  |

#### Structure 44a (<sup>2</sup>E ec-ec) (M06-2X, Benzene)

Energy (Hartrees): = - 976.8717092

No imaginary frequencies

Standard orientation:

| Center<br>Number | Atomic<br>Number | Atomic<br>Type | Coordinates (Angstroms) |           |           |
|------------------|------------------|----------------|-------------------------|-----------|-----------|
|                  |                  |                | X                       | Y         | Z         |
| 1                | 6                | 0              | -3.141434               | -0.123722 | 0.238783  |
| 2                | 6                | 0              | -3.669011               | -0.178161 | -1.051336 |
| 3                | 6                | 0              | -4.983030               | -0.577891 | -1.248021 |
| 4                | 6                | 0              | -5.778894               | -0.926521 | -0.157172 |
| 5                | 6                | 0              | -5.255999               | -0.873892 | 1.128503  |
| 6                | 6                | 0              | -3.936401               | -0.472635 | 1.324337  |
| 7                | 1                | 0              | -3.039513               | 0.106281  | -1.886897 |
| 8                | 1                | 0              | -5.392227               | -0.618205 | -2.250847 |
| 9                | 1                | 0              | -6.805590               | -1.236947 | -0.313162 |
| 10               | 1                | 0              | -5.871665               | -1.143566 | 1.978689  |
| 11               | 1                | 0              | -3.523060               | -0.429682 | 2.326947  |
| 12               | 6                | 0              | -1.712789               | 0.310626  | 0.437457  |
| 13               | 1                | 0              | -1.489995               | 0.370223  | 1.520936  |
| 14               | 7                | 0              | -1.401358               | 1.565954  | -0.224479 |
| 15               | 8                | 0              | -0.822850               | -0.619451 | -0.166285 |
| 16               | 6                | 0              | 0.318568                | 0.095453  | -0.667766 |
| 17               | 6                | 0              | 0.054465                | 1.550470  | -0.288482 |
| 18               | 1                | 0              | 0.512143                | 1.783224  | 0.686673  |
| 19               | 1                | 0              | 0.435899                | 2.257998  | -1.024528 |
| 20               | 1                | 0              | 0.341049                | -0.042916 | -1.753791 |
| 21               | 6                | 0              | 1.559755                | -0.530332 | -0.056732 |
| 22               | 1                | 0              | 1.570336                | -0.317655 | 1.020745  |
| 23               | 6                | 0              | 2.850994                | 0.022305  | -0.657733 |
| 24               | 1                | 0              | 2.751333                | 0.041425  | -1.751401 |
| 25               | 6                | 0              | 4.040480                | -0.901860 | -0.332432 |
| 26               | 1                | 0              | 4.047970                | -1.703878 | -1.077182 |
| 27               | 6                | 0              | 5.374542                | -0.169591 | -0.369845 |
| 28               | 1                | 0              | 6.191937                | -0.896994 | -0.374195 |
| 29               | 1                | 0              | 5.453179                | 0.456579  | -1.259773 |
| 30               | 8                | 0              | 1.536804                | -1.936476 | -0.276882 |
| 31               | 1                | 0              | 0.636864                | -2.227528 | -0.085483 |
| 32               | 8                | 0              | 3.006213                | 1.361793  | -0.221601 |
| 33               | 1                | 0              | 3.776898                | 1.407177  | 0.361387  |
| 34               | 8                | 0              | 3.962214                | -1.452417 | 0.976837  |
| 35               | 1                | 0              | 3.204410                | -2.049423 | 0.976553  |
| 36               | 8                | 0              | 5.486671                | 0.689806  | 0.761116  |
| 37               | 1                | 0              | 5.326848                | 0.128292  | 1.529748  |
| 38               | 6                | 0              | -1.950264               | 2.725737  | 0.450672  |
| 39               | 1                | 0              | -1.580941               | 2.820251  | 1.485774  |
| 40               | 1                | 0              | -1.674694               | 3.627917  | -0.097791 |
| 41               | 1                | 0              | -3.039973               | 2.659784  | 0.472087  |

#### Structure 44a (E<sub>2</sub> ax-ax) (M06-2X, Benzene)

Energy (Hartrees): = - 976.8712986

No imaginary frequencies

Standard orientation:

| Center<br>Number | Atomic<br>Number | Atomic<br>Type | Coordinates (Angstroms) |           |          |
|------------------|------------------|----------------|-------------------------|-----------|----------|
|                  |                  |                | X                       | Y         | Z        |
| 1                | 6                | 0              | -3.086656               | 0.062414  | 0.263422 |
| 2                | 6                | 0              | -3.280370               | -1.301805 | 0.468222 |

|    |   |   |           |           |           |
|----|---|---|-----------|-----------|-----------|
| 3  | 6 | 0 | -4.364680 | -1.951112 | -0.114628 |
| 4  | 6 | 0 | -5.263182 | -1.241266 | -0.903326 |
| 5  | 6 | 0 | -5.072030 | 0.121828  | -1.109814 |
| 6  | 6 | 0 | -3.987743 | 0.770700  | -0.530451 |
| 7  | 1 | 0 | -2.574966 | -1.850467 | 1.080961  |
| 8  | 1 | 0 | -4.505870 | -3.013730 | 0.046713  |
| 9  | 1 | 0 | -6.106331 | -1.747255 | -1.359096 |
| 10 | 1 | 0 | -5.765431 | 0.680000  | -1.728365 |
| 11 | 1 | 0 | -3.818757 | 1.827469  | -0.701448 |
| 12 | 6 | 0 | -1.926762 | 0.789814  | 0.928559  |
| 13 | 1 | 0 | -2.252851 | 1.241385  | 1.868442  |
| 14 | 7 | 0 | -1.346952 | 1.784405  | 0.057169  |
| 15 | 8 | 0 | -0.868890 | -0.123420 | 1.246087  |
| 16 | 6 | 0 | -0.046075 | -0.227281 | 0.075538  |
| 17 | 6 | 0 | -0.481807 | 0.970920  | -0.810415 |
| 18 | 1 | 0 | 0.367620  | 1.547183  | -1.171219 |
| 19 | 1 | 0 | -1.057068 | 0.613450  | -1.665754 |
| 20 | 1 | 0 | -0.249752 | -1.185846 | -0.415950 |
| 21 | 6 | 0 | 1.400485  | -0.207442 | 0.550974  |
| 22 | 1 | 0 | 1.656491  | 0.805462  | 0.888564  |
| 23 | 6 | 0 | 2.396879  | -0.587276 | -0.546388 |
| 24 | 1 | 0 | 2.019134  | -1.469810 | -1.081105 |
| 25 | 6 | 0 | 3.747634  | -0.988691 | 0.073467  |
| 26 | 1 | 0 | 3.656956  | -2.024610 | 0.413770  |
| 27 | 6 | 0 | 4.900637  | -0.886588 | -0.915406 |
| 28 | 1 | 0 | 5.776517  | -1.403164 | -0.511247 |
| 29 | 1 | 0 | 4.637157  | -1.336157 | -1.874189 |
| 30 | 8 | 0 | 1.558881  | -1.134623 | 1.620279  |
| 31 | 1 | 0 | 0.787563  | -1.024316 | 2.188884  |
| 32 | 8 | 0 | 2.473215  | 0.486126  | -1.469047 |
| 33 | 1 | 0 | 3.384963  | 0.808763  | -1.493403 |
| 34 | 8 | 0 | 4.118088  | -0.146940 | 1.158272  |
| 35 | 1 | 0 | 3.497224  | -0.335222 | 1.871481  |
| 36 | 8 | 0 | 5.208800  | 0.482506  | -1.163990 |
| 37 | 1 | 0 | 5.349851  | 0.878260  | -0.294739 |
| 38 | 6 | 0 | -0.606920 | 2.800212  | 0.806987  |
| 39 | 1 | 0 | -0.103462 | 3.464806  | 0.104017  |
| 40 | 1 | 0 | -1.310181 | 3.398246  | 1.389741  |
| 41 | 1 | 0 | 0.142634  | 2.378959  | 1.490502  |

#### Structure 44a (<sup>2</sup>E ec-ax H-bond O) (M06-2X, DMSO)

Energy (Hartrees): = - 976.8719895

No imaginary frequencies

Standard orientation:

| Center<br>Number | Atomic<br>Number | Atomic<br>Type | Coordinates (Angstroms) |           |           |
|------------------|------------------|----------------|-------------------------|-----------|-----------|
|                  |                  |                | X                       | Y         | Z         |
| 1                | 6                | 0              | 3.073780                | -0.177726 | -0.348822 |
| 2                | 6                | 0              | 3.191771                | -0.921366 | 0.825535  |
| 3                | 6                | 0              | 4.438878                | -1.113202 | 1.414472  |
| 4                | 6                | 0              | 5.579702                | -0.568506 | 0.831982  |
| 5                | 6                | 0              | 5.470374                | 0.163980  | -0.346974 |
| 6                | 6                | 0              | 4.223306                | 0.354580  | -0.933677 |
| 7                | 1                | 0              | 2.309525                | -1.366961 | 1.271449  |
| 8                | 1                | 0              | 4.519312                | -1.694293 | 2.326262  |
| 9                | 1                | 0              | 6.550580                | -0.721043 | 1.289758  |
| 10               | 1                | 0              | 6.356316                | 0.580976  | -0.812244 |
| 11               | 1                | 0              | 4.139968                | 0.917328  | -1.858814 |
| 12               | 6                | 0              | 1.719440                | 0.103701  | -0.981687 |
| 13               | 1                | 0              | 1.841162                | 0.172782  | -2.066912 |
| 14               | 7                | 0              | 1.044658                | 1.310336  | -0.496715 |
| 15               | 8                | 0              | 0.803142                | -0.936564 | -0.678397 |
| 16               | 6                | 0              | -0.143884               | -0.481280 | 0.308586  |
| 17               | 6                | 0              | 0.376944                | 0.888082  | 0.728075  |
| 18               | 1                | 0              | -0.428801               | 1.575376  | 0.986315  |
| 19               | 1                | 0              | 1.070459                | 0.804066  | 1.578537  |
| 20               | 1                | 0              | -0.152227               | -1.208017 | 1.126221  |
| 21               | 6                | 0              | -1.514691               | -0.452631 | -0.359742 |
| 22               | 1                | 0              | -1.545021               | 0.382321  | -1.071581 |
| 23               | 6                | 0              | -2.667783               | -0.264322 | 0.632344  |
| 24               | 1                | 0              | -2.465260               | -0.853992 | 1.537193  |
| 25               | 6                | 0              | -3.980505               | -0.799938 | 0.039669  |
| 26               | 1                | 0              | -3.956548               | -1.889947 | 0.128004  |
| 27               | 6                | 0              | -5.211507               | -0.282427 | 0.767528  |
| 28               | 1                | 0              | -6.086443               | -0.866517 | 0.467800  |
| 29               | 1                | 0              | -5.087574               | -0.366755 | 1.848336  |
| 30               | 8                | 0              | -1.715921               | -1.686995 | -1.042754 |
| 31               | 1                | 0              | -0.886680               | -1.871983 | -1.501710 |
| 32               | 8                | 0              | -2.720482               | 1.109405  | 0.994070  |
| 33               | 1                | 0              | -3.618097               | 1.429089  | 0.826898  |
| 34               | 8                | 0              | -4.155037               | -0.415361 | -1.319606 |
| 35               | 1                | 0              | -3.471704               | -0.880162 | -1.818445 |
| 36               | 8                | 0              | -5.420527               | 1.099765  | 0.472489  |

|    |   |   |           |          |           |
|----|---|---|-----------|----------|-----------|
| 37 | 1 | 0 | -5.455801 | 1.159413 | -0.490949 |
| 38 | 6 | 0 | 1.863578  | 2.499860 | -0.360227 |
| 39 | 1 | 0 | 2.355183  | 2.720951 | -1.310570 |
| 40 | 1 | 0 | 1.217947  | 3.342972 | -0.106120 |
| 41 | 1 | 0 | 2.635284  | 2.407210 | 0.418784  |

-----

**Structure 44a (<sup>2</sup>E ec-ax H-bond N) (M06-2X, DMSO)**

Energy (Hartrees): = - 976.8759144

No imaginary frequencies

Standard orientation:

| Center<br>Number | Atomic<br>Number | Atomic<br>Type | Coordinates (Angstroms) |           |           |
|------------------|------------------|----------------|-------------------------|-----------|-----------|
|                  |                  |                | X                       | Y         | Z         |
| 1                | 6                | 0              | 2.850174                | -0.227775 | -0.442936 |
| 2                | 6                | 0              | 3.069325                | -1.264804 | 0.463874  |
| 3                | 6                | 0              | 4.346891                | -1.792024 | 0.631740  |
| 4                | 6                | 0              | 5.413789                | -1.292090 | -0.109429 |
| 5                | 6                | 0              | 5.198292                | -0.265757 | -1.025312 |
| 6                | 6                | 0              | 3.921028                | 0.260116  | -1.191841 |
| 7                | 1                | 0              | 2.235675                | -1.673097 | 1.024072  |
| 8                | 1                | 0              | 4.507435                | -2.599141 | 1.337510  |
| 9                | 1                | 0              | 6.407075                | -1.707185 | 0.018647  |
| 10               | 1                | 0              | 6.022537                | 0.119372  | -1.614842 |
| 11               | 1                | 0              | 3.751530                | 1.054131  | -1.913080 |
| 12               | 6                | 0              | 1.478292                | 0.403008  | -0.606218 |
| 13               | 1                | 0              | 1.366216                | 0.760319  | -1.635156 |
| 14               | 7                | 0              | 1.202617                | 1.526629  | 0.308146  |
| 15               | 8                | 0              | 0.459507                | -0.535236 | -0.314174 |
| 16               | 6                | 0              | -0.243478               | -0.146432 | 0.876353  |
| 17               | 6                | 0              | 0.675982                | 0.889393  | 1.514672  |
| 18               | 1                | 0              | 0.136599                | 1.616080  | 2.125765  |
| 19               | 1                | 0              | 1.463186                | 0.422599  | 2.122958  |
| 20               | 1                | 0              | -0.392975               | -1.031987 | 1.496048  |
| 21               | 6                | 0              | -1.606603               | 0.432371  | 0.510214  |
| 22               | 1                | 0              | -2.108472               | 0.706570  | 1.448490  |
| 23               | 6                | 0              | -2.489084               | -0.607098 | -0.182234 |
| 24               | 1                | 0              | -1.905193               | -1.098486 | -0.968396 |
| 25               | 6                | 0              | -3.692570               | 0.068760  | -0.864992 |
| 26               | 1                | 0              | -3.364822               | 0.401292  | -1.854274 |
| 27               | 6                | 0              | -4.878430               | -0.869852 | -1.027430 |
| 28               | 1                | 0              | -5.604155               | -0.430921 | -1.718542 |
| 29               | 1                | 0              | -4.558880               | -1.836083 | -1.420171 |
| 30               | 8                | 0              | -1.492640               | 1.574425  | -0.331599 |
| 31               | 1                | 0              | -0.578418               | 1.908750  | -0.252506 |
| 32               | 8                | 0              | -2.835838               | -1.598917 | 0.776321  |
| 33               | 1                | 0              | -3.781263               | -1.517217 | 0.959675  |
| 34               | 8                | 0              | -4.196974               | 1.175408  | -0.121381 |
| 35               | 1                | 0              | -3.494760               | 1.837970  | -0.114718 |
| 36               | 8                | 0              | -5.491073               | -1.109685 | 0.240249  |
| 37               | 1                | 0              | -5.682461               | -0.235687 | 0.603798  |
| 38               | 6                | 0              | 2.282231                | 2.473813  | 0.528769  |
| 39               | 1                | 0              | 2.629724                | 2.865530  | -0.429440 |
| 40               | 1                | 0              | 1.899542                | 3.306130  | 1.122025  |
| 41               | 1                | 0              | 3.134682                | 2.026935  | 1.058399  |

-----

**Structure 44a (<sup>2</sup>E ec-ec) (M06-2X, DMSO)**

Energy (Hartrees): = - 976.8742948

No imaginary frequencies

Standard orientation:

| Center<br>Number | Atomic<br>Number | Atomic<br>Type | Coordinates (Angstroms) |           |           |
|------------------|------------------|----------------|-------------------------|-----------|-----------|
|                  |                  |                | X                       | Y         | Z         |
| 1                | 6                | 0              | -3.150568               | -0.121778 | 0.241537  |
| 2                | 6                | 0              | -3.606433               | -0.478081 | -1.028546 |
| 3                | 6                | 0              | -4.923530               | -0.878627 | -1.209115 |
| 4                | 6                | 0              | -5.796831               | -0.919913 | -0.121574 |
| 5                | 6                | 0              | -5.347019               | -0.560382 | 1.143494  |
| 6                | 6                | 0              | -4.022444               | -0.163969 | 1.324006  |
| 7                | 1                | 0              | -2.920681               | -0.436896 | -1.867836 |
| 8                | 1                | 0              | -5.273856               | -1.159295 | -2.195898 |
| 9                | 1                | 0              | -6.825213               | -1.231877 | -0.264208 |
| 10               | 1                | 0              | -6.022903               | -0.589184 | 1.990474  |
| 11               | 1                | 0              | -3.665369               | 0.115743  | 2.310176  |
| 12               | 6                | 0              | -1.724405               | 0.330035  | 0.418471  |
| 13               | 1                | 0              | -1.513875               | 0.489600  | 1.492100  |
| 14               | 7                | 0              | -1.416675               | 1.528029  | -0.350722 |
| 15               | 8                | 0              | -0.826291               | -0.644086 | -0.095779 |
| 16               | 6                | 0              | 0.316052                | 0.032590  | -0.651718 |
| 17               | 6                | 0              | 0.042309                | 1.511907  | -0.396022 |

|    |   |   |           |           |           |
|----|---|---|-----------|-----------|-----------|
| 18 | 1 | 0 | 0.480243  | 1.824988  | 0.564618  |
| 19 | 1 | 0 | 0.426790  | 2.158290  | -1.184950 |
| 20 | 1 | 0 | 0.344885  | -0.194050 | -1.722734 |
| 21 | 6 | 0 | 1.559185  | -0.531141 | 0.012329  |
| 22 | 1 | 0 | 1.561360  | -0.236777 | 1.070094  |
| 23 | 6 | 0 | 2.849452  | -0.014503 | -0.624029 |
| 24 | 1 | 0 | 2.750893  | -0.057332 | -1.717053 |
| 25 | 6 | 0 | 4.037635  | -0.915402 | -0.248212 |
| 26 | 1 | 0 | 4.013918  | -1.785237 | -0.911045 |
| 27 | 6 | 0 | 5.379593  | -0.217508 | -0.408824 |
| 28 | 1 | 0 | 6.183006  | -0.958322 | -0.361290 |
| 29 | 1 | 0 | 5.436829  | 0.302311  | -1.366283 |
| 30 | 8 | 0 | 1.548606  | -1.951454 | -0.098624 |
| 31 | 1 | 0 | 0.663816  | -2.236117 | 0.161799  |
| 32 | 8 | 0 | 3.007643  | 1.346841  | -0.250886 |
| 33 | 1 | 0 | 3.835269  | 1.427409  | 0.243241  |
| 34 | 8 | 0 | 3.993896  | -1.330729 | 1.112806  |
| 35 | 1 | 0 | 3.235673  | -1.921981 | 1.191287  |
| 36 | 8 | 0 | 5.553513  | 0.762368  | 0.615643  |
| 37 | 1 | 0 | 5.432282  | 0.292013  | 1.450391  |
| 38 | 6 | 0 | -1.964665 | 2.737127  | 0.239517  |
| 39 | 1 | 0 | -1.599417 | 2.898058  | 1.266768  |
| 40 | 1 | 0 | -1.680628 | 3.597655  | -0.368578 |
| 41 | 1 | 0 | -3.055226 | 2.679140  | 0.260823  |

### Structure 44a (E<sub>2</sub> ax-ax) (M06-2X, DMSO)

Energy (Hartrees): = - 976.8734343  
No imaginary frequencies

Standard orientation:

| Center<br>Number | Atomic<br>Number | Atomic<br>Type | Coordinates (Angstroms) |           |           |
|------------------|------------------|----------------|-------------------------|-----------|-----------|
|                  |                  |                | X                       | Y         | Z         |
| 1                | 6                | 0              | -3.095740               | 0.065098  | 0.262936  |
| 2                | 6                | 0              | -3.211051               | -1.314154 | 0.420164  |
| 3                | 6                | 0              | -4.295692               | -1.995723 | -0.128225 |
| 4                | 6                | 0              | -5.274171               | -1.302107 | -0.832103 |
| 5                | 6                | 0              | -5.164403               | 0.078241  | -0.987624 |
| 6                | 6                | 0              | -4.079840               | 0.757563  | -0.444761 |
| 7                | 1                | 0              | -2.446772               | -1.851759 | 0.969118  |
| 8                | 1                | 0              | -4.373241               | -3.070263 | -0.005745 |
| 9                | 1                | 0              | -6.117233               | -1.831921 | -1.260689 |
| 10               | 1                | 0              | -5.923854               | 0.624401  | -1.535824 |
| 11               | 1                | 0              | -3.984713               | 1.829880  | -0.574755 |
| 12               | 6                | 0              | -1.933347               | 0.833269  | 0.876186  |
| 13               | 1                | 0              | -2.259227               | 1.353577  | 1.779655  |
| 14               | 7                | 0              | -1.358641               | 1.765748  | -0.068612 |
| 15               | 8                | 0              | -0.875401               | -0.054523 | 1.252195  |
| 16               | 6                | 0              | -0.040898               | -0.228893 | 0.096977  |
| 17               | 6                | 0              | -0.489576               | 0.893363  | -0.874029 |
| 18               | 1                | 0              | 0.352369                | 1.450378  | -1.279336 |
| 19               | 1                | 0              | -1.063172               | 0.464455  | -1.697899 |
| 20               | 1                | 0              | -0.224090               | -1.223386 | -0.325608 |
| 21               | 6                | 0              | 1.403906                | -0.151137 | 0.572694  |
| 22               | 1                | 0              | 1.643771                | 0.887286  | 0.833653  |
| 23               | 6                | 0              | 2.407490                | -0.601118 | -0.491547 |
| 24               | 1                | 0              | 2.038595                | -1.520604 | -0.966102 |
| 25               | 6                | 0              | 3.755896                | -0.950091 | 0.158692  |
| 26               | 1                | 0              | 3.658337                | -1.949083 | 0.593102  |
| 27               | 6                | 0              | 4.906215                | -0.965724 | -0.835455 |
| 28               | 1                | 0              | 5.780131                | -1.434910 | -0.374398 |
| 29               | 1                | 0              | 4.639124                | -1.528070 | -1.731504 |
| 30               | 8                | 0              | 1.572902                | -0.992685 | 1.709954  |
| 31               | 1                | 0              | 0.815218                | -0.824762 | 2.283550  |
| 32               | 8                | 0              | 2.484487                | 0.415817  | -1.480971 |
| 33               | 1                | 0              | 3.410762                | 0.680289  | -1.569745 |
| 34               | 8                | 0              | 4.134815                | -0.009966 | 1.158413  |
| 35               | 1                | 0              | 3.508664                | -0.120918 | 1.884122  |
| 36               | 8                | 0              | 5.224515                | 0.363940  | -1.249445 |
| 37               | 1                | 0              | 5.389415                | 0.858674  | -0.436390 |
| 38               | 6                | 0              | -0.616300               | 2.831464  | 0.611684  |
| 39               | 1                | 0              | -0.111944               | 3.445436  | -0.135461 |
| 40               | 1                | 0              | -1.320221               | 3.464348  | 1.155317  |
| 41               | 1                | 0              | 0.133105                | 2.455752  | 1.320535  |

### Structure 44b (<sup>2</sup>E ec-ec H-bond O) (M06-2X, Gas Phase)

Energy (Hartrees): = - 976.8541021  
No imaginary frequencies

Standard orientation:

| Center<br>Number | Atomic<br>Number | Atomic<br>Type | Coordinates (Angstroms) |           |           |
|------------------|------------------|----------------|-------------------------|-----------|-----------|
|                  |                  |                | X                       | Y         | Z         |
| 1                | 6                | 0              | 2.838389                | 0.007100  | 0.142177  |
| 2                | 6                | 0              | 2.315018                | -1.160656 | -0.413254 |
| 3                | 6                | 0              | 3.156785                | -2.211035 | -0.747059 |
| 4                | 6                | 0              | 4.529985                | -2.100109 | -0.532997 |
| 5                | 6                | 0              | 5.054927                | -0.937873 | 0.015685  |
| 6                | 6                | 0              | 4.206670                | 0.113943  | 0.355405  |
| 7                | 1                | 0              | 1.246148                | -1.227638 | -0.586298 |
| 8                | 1                | 0              | 2.747617                | -3.117685 | -1.176833 |
| 9                | 1                | 0              | 5.186471                | -2.920989 | -0.795986 |
| 10               | 1                | 0              | 6.121579                | -0.848669 | 0.183291  |
| 11               | 1                | 0              | 4.611496                | 1.022157  | 0.790094  |
| 12               | 6                | 0              | 1.905111                | 1.134969  | 0.500154  |
| 13               | 1                | 0              | 2.479237                | 1.967292  | 0.950991  |
| 14               | 7                | 0              | 1.118713                | 1.590000  | -0.633112 |
| 15               | 8                | 0              | 0.936144                | 0.701472  | 1.447134  |
| 16               | 6                | 0              | -0.352093               | 1.218864  | 1.078031  |
| 17               | 6                | 0              | -0.036467               | 2.229256  | -0.017240 |
| 18               | 1                | 0              | -0.858916               | 2.343724  | -0.722783 |
| 19               | 1                | 0              | 0.220663                | 3.209097  | 0.419867  |
| 20               | 1                | 0              | -0.799526               | 1.664803  | 1.969810  |
| 21               | 6                | 0              | -1.200725               | 0.045273  | 0.583428  |
| 22               | 1                | 0              | -0.912422               | -0.173752 | -0.453408 |
| 23               | 6                | 0              | -2.699874               | 0.344207  | 0.597396  |
| 24               | 1                | 0              | -2.959652               | 0.796662  | 1.564435  |
| 25               | 6                | 0              | -3.507901               | -0.965055 | 0.486789  |
| 26               | 1                | 0              | -3.597302               | -1.382296 | 1.494748  |
| 27               | 6                | 0              | -4.897387               | -0.741919 | -0.096980 |
| 28               | 1                | 0              | -5.511139               | -1.632767 | 0.067778  |
| 29               | 1                | 0              | -5.382997               | 0.118061  | 0.366400  |
| 30               | 8                | 0              | -0.974674               | -1.090932 | 1.407162  |
| 31               | 1                | 0              | -0.041763               | -1.059259 | 1.657482  |
| 32               | 8                | 0              | -2.983874               | 1.300291  | -0.407261 |
| 33               | 1                | 0              | -3.519871               | 0.879580  | -1.094185 |
| 34               | 8                | 0              | -2.898899               | -1.913191 | -0.378841 |
| 35               | 1                | 0              | -2.079275               | -2.186717 | 0.049900  |
| 36               | 8                | 0              | -4.792983               | -0.463822 | -1.488210 |
| 37               | 1                | 0              | -4.264132               | -1.182686 | -1.855144 |
| 38               | 6                | 0              | 1.860207                | 2.425324  | -1.555177 |
| 39               | 1                | 0              | 2.711465                | 1.866461  | -1.949026 |
| 40               | 1                | 0              | 1.216565                | 2.703319  | -2.390469 |
| 41               | 1                | 0              | 2.233180                | 3.347022  | -1.076896 |

### Structure 44b (<sup>2</sup>E ec-ec H-bond N) (M06-2X, Gas Phase)

Energy (Hartrees): = - 976.8566424  
 No imaginary frequencies

Standard orientation:

| Center<br>Number | Atomic<br>Number | Atomic<br>Type | Coordinates (Angstroms) |           |           |
|------------------|------------------|----------------|-------------------------|-----------|-----------|
|                  |                  |                | X                       | Y         | Z         |
| 1                | 6                | 0              | -2.579478               | -0.288404 | -0.394675 |
| 2                | 6                | 0              | -1.941152               | -1.387563 | 0.178586  |
| 3                | 6                | 0              | -2.662493               | -2.542203 | 0.448778  |
| 4                | 6                | 0              | -4.022013               | -2.607302 | 0.151125  |
| 5                | 6                | 0              | -4.658850               | -1.514576 | -0.423043 |
| 6                | 6                | 0              | -3.934563               | -0.358423 | -0.699743 |
| 7                | 1                | 0              | -0.882276               | -1.325969 | 0.402967  |
| 8                | 1                | 0              | -2.165092               | -3.396799 | 0.891918  |
| 9                | 1                | 0              | -4.580591               | -3.511146 | 0.363572  |
| 10               | 1                | 0              | -5.714244               | -1.562662 | -0.663091 |
| 11               | 1                | 0              | -4.424733               | 0.492925  | -1.162002 |
| 12               | 6                | 0              | -1.809912               | 0.979260  | -0.656547 |
| 13               | 1                | 0              | -2.378180               | 1.616803  | -1.360657 |
| 14               | 7                | 0              | -1.524809               | 1.735774  | 0.567838  |
| 15               | 8                | 0              | -0.534865               | 0.710290  | -1.196031 |
| 16               | 6                | 0              | 0.415643                | 1.636827  | -0.655451 |
| 17               | 6                | 0              | -0.448721               | 2.624440  | 0.130046  |
| 18               | 1                | 0              | 0.071417                | 3.064075  | 0.983665  |
| 19               | 1                | 0              | -0.828935               | 3.430569  | -0.517335 |
| 20               | 1                | 0              | 0.970466                | 2.099076  | -1.473331 |
| 21               | 6                | 0              | 1.405701                | 0.893611  | 0.233676  |
| 22               | 1                | 0              | 2.128430                | 1.628311  | 0.614567  |
| 23               | 6                | 0              | 2.202755                | -0.130771 | -0.575925 |
| 24               | 1                | 0              | 1.501312                | -0.714622 | -1.183456 |
| 25               | 6                | 0              | 2.935533                | -1.111808 | 0.360837  |
| 26               | 1                | 0              | 2.241618                | -1.924741 | 0.599044  |
| 27               | 6                | 0              | 4.193271                | -1.689988 | -0.276195 |
| 28               | 1                | 0              | 4.534191                | -2.553799 | 0.302992  |
| 29               | 1                | 0              | 4.001613                | -1.999659 | -1.304358 |
| 30               | 8                | 0              | 0.769350                | 0.237573  | 1.323929  |
| 31               | 1                | 0              | -0.128976               | 0.596348  | 1.426648  |

|    |   |   |           |           |           |
|----|---|---|-----------|-----------|-----------|
| 32 | 8 | 0 | 3.042670  | 0.581635  | -1.466005 |
| 33 | 1 | 0 | 3.957744  | 0.489426  | -1.168886 |
| 34 | 8 | 0 | 3.388424  | -0.494891 | 1.560254  |
| 35 | 1 | 0 | 2.600816  | -0.239930 | 2.056080  |
| 36 | 8 | 0 | 5.207445  | -0.694169 | -0.320877 |
| 37 | 1 | 0 | 5.270562  | -0.353292 | 0.579571  |
| 38 | 6 | 0 | -2.684187 | 2.416567  | 1.116479  |
| 39 | 1 | 0 | -3.442147 | 1.681853  | 1.392082  |
| 40 | 1 | 0 | -2.392231 | 2.965649  | 2.012336  |
| 41 | 1 | 0 | -3.120488 | 3.125651  | 0.394947  |

### Structure 44b ( $^2E_{ax-ec}$ ) (M06-2X, Gas Phase)

Energy (Hartrees): = - 976.8502451

No imaginary frequencies

Standard orientation:

| Center<br>Number | Atomic<br>Number | Atomic<br>Type | Coordinates (Angstroms) |           |           |
|------------------|------------------|----------------|-------------------------|-----------|-----------|
|                  |                  |                | X                       | Y         | Z         |
| 1                | 6                | 0              | 3.123527                | -0.074738 | -0.283754 |
| 2                | 6                | 0              | 3.102762                | 1.290715  | -0.023827 |
| 3                | 6                | 0              | 4.239709                | 1.922882  | 0.471381  |
| 4                | 6                | 0              | 5.397465                | 1.193500  | 0.710522  |
| 5                | 6                | 0              | 5.419642                | -0.174557 | 0.451093  |
| 6                | 6                | 0              | 4.287732                | -0.804808 | -0.047644 |
| 7                | 1                | 0              | 2.195680                | 1.850442  | -0.211587 |
| 8                | 1                | 0              | 4.219243                | 2.987819  | 0.670268  |
| 9                | 1                | 0              | 6.281302                | 1.686759  | 1.096902  |
| 10               | 1                | 0              | 6.320365                | -0.747421 | 0.636742  |
| 11               | 1                | 0              | 4.293053                | -1.871804 | -0.244763 |
| 12               | 6                | 0              | 1.909130                | -0.805354 | -0.788671 |
| 13               | 1                | 0              | 2.176462                | -1.390390 | -1.679785 |
| 14               | 7                | 0              | 1.313074                | -1.718963 | 0.166690  |
| 15               | 8                | 0              | 0.873503                | 0.111260  | -1.164929 |
| 16               | 6                | 0              | -0.355156               | -0.619767 | -1.150789 |
| 17               | 6                | 0              | -0.001824               | -1.953587 | -0.437547 |
| 18               | 1                | 0              | -0.743556               | -2.237226 | 0.306043  |
| 19               | 1                | 0              | 0.082493                | -2.753207 | -1.176982 |
| 20               | 1                | 0              | -0.674686               | -0.789114 | -2.186708 |
| 21               | 6                | 0              | -1.389589               | 0.262458  | -0.469756 |
| 22               | 1                | 0              | -1.141133               | 0.369516  | 0.593439  |
| 23               | 6                | 0              | -2.808215               | -0.308768 | -0.542775 |
| 24               | 1                | 0              | -2.977881               | -0.721313 | -1.548159 |
| 25               | 6                | 0              | -3.846155               | 0.809456  | -0.342851 |
| 26               | 1                | 0              | -3.941875               | 1.338819  | -1.296079 |
| 27               | 6                | 0              | -5.208385               | 0.272310  | 0.077485  |
| 28               | 1                | 0              | -5.962144               | 1.057407  | -0.034614 |
| 29               | 1                | 0              | -5.495626               | -0.586186 | -0.531889 |
| 30               | 8                | 0              | -1.393024               | 1.539374  | -1.103062 |
| 31               | 1                | 0              | -0.471248               | 1.759288  | -1.280316 |
| 32               | 8                | 0              | -2.900814               | -1.368578 | 0.390789  |
| 33               | 1                | 0              | -3.616965               | -1.177263 | 1.012556  |
| 34               | 8                | 0              | -3.475774               | 1.715517  | 0.686419  |
| 35               | 1                | 0              | -2.707015               | 2.197455  | 0.359865  |
| 36               | 8                | 0              | -5.156014               | -0.173362 | 1.427090  |
| 37               | 1                | 0              | -4.795822               | 0.567547  | 1.929745  |
| 38               | 6                | 0              | 1.223897                | -1.170941 | 1.523156  |
| 39               | 1                | 0              | 0.621522                | -1.849476 | 2.127070  |
| 40               | 1                | 0              | 2.221358                | -1.115572 | 1.959502  |
| 41               | 1                | 0              | 0.774707                | -0.169821 | 1.565338  |

### Structure 44b ( $^2E_{ec-ec}$ H-bond O) (M06-2X, Benzene)

Energy (Hartrees): = - 976.8729161

No imaginary frequencies

Standard orientation:

| Center<br>Number | Atomic<br>Number | Atomic<br>Type | Coordinates (Angstroms) |           |           |
|------------------|------------------|----------------|-------------------------|-----------|-----------|
|                  |                  |                | X                       | Y         | Z         |
| 1                | 6                | 0              | -2.841187               | 0.002979  | -0.146920 |
| 2                | 6                | 0              | -2.314202               | -1.164224 | 0.407291  |
| 3                | 6                | 0              | -3.153039               | -2.216005 | 0.745776  |
| 4                | 6                | 0              | -4.527520               | -2.106839 | 0.537423  |
| 5                | 6                | 0              | -5.056228               | -0.945233 | -0.010136 |
| 6                | 6                | 0              | -4.211058               | 0.108119  | -0.354470 |
| 7                | 1                | 0              | -1.244879               | -1.231612 | 0.578406  |
| 8                | 1                | 0              | -2.740344               | -3.121530 | 1.175212  |
| 9                | 1                | 0              | -5.182099               | -2.928317 | 0.804444  |
| 10               | 1                | 0              | -6.124039               | -0.857486 | -0.173019 |
| 11               | 1                | 0              | -4.619416               | 1.015908  | -0.787054 |
| 12               | 6                | 0              | -1.910920               | 1.135087  | -0.503280 |

|    |   |   |           |           |           |
|----|---|---|-----------|-----------|-----------|
| 13 | 1 | 0 | -2.486014 | 1.964180  | -0.956544 |
| 14 | 7 | 0 | -1.128337 | 1.593419  | 0.631994  |
| 15 | 8 | 0 | -0.936285 | 0.702053  | -1.447358 |
| 16 | 6 | 0 | 0.351329  | 1.221989  | -1.074915 |
| 17 | 6 | 0 | 0.028882  | 2.232278  | 0.017939  |
| 18 | 1 | 0 | 0.846179  | 2.349664  | 0.728822  |
| 19 | 1 | 0 | -0.226806 | 3.210760  | -0.421454 |
| 20 | 1 | 0 | 0.800327  | 1.669640  | -1.965063 |
| 21 | 6 | 0 | 1.201776  | 0.048563  | -0.581026 |
| 22 | 1 | 0 | 0.913270  | -0.175326 | 0.454593  |
| 23 | 6 | 0 | 2.701844  | 0.346190  | -0.595432 |
| 24 | 1 | 0 | 2.962119  | 0.802645  | -1.559901 |
| 25 | 6 | 0 | 3.511755  | -0.962498 | -0.487792 |
| 26 | 1 | 0 | 3.605239  | -1.376809 | -1.496346 |
| 27 | 6 | 0 | 4.901540  | -0.742983 | 0.093926  |
| 28 | 1 | 0 | 5.511506  | -1.636722 | -0.069582 |
| 29 | 1 | 0 | 5.393552  | 0.110846  | -0.374285 |
| 30 | 8 | 0 | 0.975966  | -1.086303 | -1.408685 |
| 31 | 1 | 0 | 0.037928  | -1.063865 | -1.641087 |
| 32 | 8 | 0 | 2.988724  | 1.298550  | 0.415035  |
| 33 | 1 | 0 | 3.518298  | 0.867564  | 1.100453  |
| 34 | 8 | 0 | 2.902848  | -1.914634 | 0.375857  |
| 35 | 1 | 0 | 2.079352  | -2.181060 | -0.050301 |
| 36 | 8 | 0 | 4.804281  | -0.461430 | 1.487603  |
| 37 | 1 | 0 | 4.283244  | -1.183135 | 1.861060  |
| 38 | 6 | 0 | -1.870034 | 2.434724  | 1.549320  |
| 39 | 1 | 0 | -2.724044 | 1.882193  | 1.946919  |
| 40 | 1 | 0 | -1.227337 | 2.713403  | 2.385842  |
| 41 | 1 | 0 | -2.239566 | 3.356361  | 1.069082  |

-----

**Structure 44b (<sup>2</sup>E ec-ec H-bond N) (M06-2X, Benzene)**

Energy (Hartrees): = - 976.8762374  
 No imaginary frequencies

Standard orientation:

| Center<br>Number | Atomic<br>Number | Atomic<br>Type | Coordinates (Angstroms) |           |           |
|------------------|------------------|----------------|-------------------------|-----------|-----------|
|                  |                  |                | X                       | Y         | Z         |
| 1                | 6                | 0              | -2.584788               | -0.286719 | -0.391366 |
| 2                | 6                | 0              | -1.953749               | -1.383164 | 0.196037  |
| 3                | 6                | 0              | -2.677200               | -2.537510 | 0.463833  |
| 4                | 6                | 0              | -4.033197               | -2.604876 | 0.149319  |
| 5                | 6                | 0              | -4.663540               | -1.514418 | -0.437304 |
| 6                | 6                | 0              | -3.936921               | -0.358481 | -0.710641 |
| 7                | 1                | 0              | -0.897872               | -1.320718 | 0.434824  |
| 8                | 1                | 0              | -2.184721               | -3.389374 | 0.918375  |
| 9                | 1                | 0              | -4.594013               | -3.508264 | 0.359480  |
| 10               | 1                | 0              | -5.716600               | -1.563578 | -0.688808 |
| 11               | 1                | 0              | -4.422415               | 0.492070  | -1.179198 |
| 12               | 6                | 0              | -1.813694               | 0.980904  | -0.653020 |
| 13               | 1                | 0              | -2.383394               | 1.619250  | -1.353828 |
| 14               | 7                | 0              | -1.518261               | 1.733707  | 0.569376  |
| 15               | 8                | 0              | -0.539290               | 0.708185  | -1.200254 |
| 16               | 6                | 0              | 0.413820                | 1.637926  | -0.665605 |
| 17               | 6                | 0              | -0.447146               | 2.625347  | 0.122836  |
| 18               | 1                | 0              | 0.075928                | 3.068833  | 0.972462  |
| 19               | 1                | 0              | -0.833852               | 3.427506  | -0.524491 |
| 20               | 1                | 0              | 0.960518                | 2.103253  | -1.487140 |
| 21               | 6                | 0              | 1.409671                | 0.898979  | 0.221269  |
| 22               | 1                | 0              | 2.130840                | 1.638515  | 0.595489  |
| 23               | 6                | 0              | 2.207008                | -0.132902 | -0.579611 |
| 24               | 1                | 0              | 1.509525                | -0.720134 | -1.187750 |
| 25               | 6                | 0              | 2.935632                | -1.112679 | 0.362404  |
| 26               | 1                | 0              | 2.241200                | -1.924937 | 0.599615  |
| 27               | 6                | 0              | 4.192618                | -1.698115 | -0.267068 |
| 28               | 1                | 0              | 4.531339                | -2.557866 | 0.319401  |
| 29               | 1                | 0              | 4.002488                | -2.020694 | -1.291658 |
| 30               | 8                | 0              | 0.774766                | 0.251746  | 1.318855  |
| 31               | 1                | 0              | -0.125325               | 0.611723  | 1.414137  |
| 32               | 8                | 0              | 3.056416                | 0.571223  | -1.471775 |
| 33               | 1                | 0              | 3.967317                | 0.477202  | -1.162494 |
| 34               | 8                | 0              | 3.385990                | -0.492482 | 1.562611  |
| 35               | 1                | 0              | 2.595952                | -0.223874 | 2.047885  |
| 36               | 8                | 0              | 5.213128                | -0.705326 | -0.319722 |
| 37               | 1                | 0              | 5.282076                | -0.360971 | 0.579421  |
| 38               | 6                | 0              | -2.670443               | 2.415067  | 1.132974  |
| 39               | 1                | 0              | -3.423534               | 1.683494  | 1.430174  |
| 40               | 1                | 0              | -2.363274               | 2.970221  | 2.020353  |
| 41               | 1                | 0              | -3.120859               | 3.119490  | 0.416071  |

-----

**Structure 44b (<sup>2</sup>E ax-ec) (M06-2X, Benzene)**

Energy (Hartrees): = - 976.8688655



No imaginary frequencies

Standard orientation:

| Center<br>Number | Atomic<br>Number | Atomic<br>Type | Coordinates (Angstroms) |           |           |
|------------------|------------------|----------------|-------------------------|-----------|-----------|
|                  |                  |                | X                       | Y         | Z         |
| 1                | 6                | 0              | 3.126856                | -0.076603 | -0.288270 |
| 2                | 6                | 0              | 3.096600                | 1.287197  | -0.016884 |
| 3                | 6                | 0              | 4.231724                | 1.924929  | 0.476077  |
| 4                | 6                | 0              | 5.397458                | 1.203352  | 0.702296  |
| 5                | 6                | 0              | 5.429716                | -0.162346 | 0.430401  |
| 6                | 6                | 0              | 4.299757                | -0.798117 | -0.067081 |
| 7                | 1                | 0              | 2.184125                | 1.843097  | -0.191463 |
| 8                | 1                | 0              | 4.203369                | 2.988227  | 0.684425  |
| 9                | 1                | 0              | 6.279391                | 1.700907  | 1.088432  |
| 10               | 1                | 0              | 6.336820                | -0.729155 | 0.605040  |
| 11               | 1                | 0              | 4.315582                | -1.863281 | -0.274965 |
| 12               | 6                | 0              | 1.912297                | -0.816483 | -0.781194 |
| 13               | 1                | 0              | 2.179626                | -1.415639 | -1.662531 |
| 14               | 7                | 0              | 1.317913                | -1.716204 | 0.190577  |
| 15               | 8                | 0              | 0.874704                | 0.092906  | -1.168124 |
| 16               | 6                | 0              | -0.354668               | -0.639089 | -1.141446 |
| 17               | 6                | 0              | 0.002252                | -1.961259 | -0.409607 |
| 18               | 1                | 0              | -0.735042               | -2.235801 | 0.341498  |
| 19               | 1                | 0              | 0.086048                | -2.770695 | -1.138098 |
| 20               | 1                | 0              | -0.674870               | -0.825497 | -2.173805 |
| 21               | 6                | 0              | -1.389193               | 0.252748  | -0.471294 |
| 22               | 1                | 0              | -1.141360               | 0.372521  | 0.590668  |
| 23               | 6                | 0              | -2.810737               | -0.313445 | -0.542394 |
| 24               | 1                | 0              | -2.980486               | -0.735374 | -1.543222 |
| 25               | 6                | 0              | -3.846423               | 0.808792  | -0.352309 |
| 26               | 1                | 0              | -3.942855               | 1.331114  | -1.309161 |
| 27               | 6                | 0              | -5.211973               | 0.281613  | 0.066528  |
| 28               | 1                | 0              | -5.960586               | 1.071418  | -0.048064 |
| 29               | 1                | 0              | -5.506680               | -0.573904 | -0.543559 |
| 30               | 8                | 0              | -1.388373               | 1.523217  | -1.119239 |
| 31               | 1                | 0              | -0.464187               | 1.750073  | -1.275569 |
| 32               | 8                | 0              | -2.912318               | -1.364783 | 0.403306  |
| 33               | 1                | 0              | -3.627698               | -1.156837 | 1.020548  |
| 34               | 8                | 0              | -3.474338               | 1.722116  | 0.672157  |
| 35               | 1                | 0              | -2.699503               | 2.194218  | 0.345015  |
| 36               | 8                | 0              | -5.169548               | -0.163054 | 1.419734  |
| 37               | 1                | 0              | -4.817111               | 0.579727  | 1.925708  |
| 38               | 6                | 0              | 1.228115                | -1.148345 | 1.538730  |
| 39               | 1                | 0              | 0.622817                | -1.815871 | 2.152938  |
| 40               | 1                | 0              | 2.224102                | -1.090959 | 1.979478  |
| 41               | 1                | 0              | 0.781408                | -0.145740 | 1.568677  |

### Structure 44b ( $^2E$ ec-ec H-bond O) (M06-2X, DMSO)

Energy (Hartrees): = - 976.8754891

No imaginary frequencies

Standard orientation:

| Center<br>Number | Atomic<br>Number | Atomic<br>Type | Coordinates (Angstroms) |           |           |
|------------------|------------------|----------------|-------------------------|-----------|-----------|
|                  |                  |                | X                       | Y         | Z         |
| 1                | 6                | 0              | -2.870607               | -0.037211 | -0.175141 |
| 2                | 6                | 0              | -2.361905               | -1.250954 | 0.290227  |
| 3                | 6                | 0              | -3.225539               | -2.265507 | 0.681159  |
| 4                | 6                | 0              | -4.605694               | -2.071889 | 0.617323  |
| 5                | 6                | 0              | -5.115901               | -0.863046 | 0.158529  |
| 6                | 6                | 0              | -4.247060               | 0.151551  | -0.240949 |
| 7                | 1                | 0              | -1.287508               | -1.396083 | 0.342549  |
| 8                | 1                | 0              | -2.827084               | -3.207987 | 1.039535  |
| 9                | 1                | 0              | -5.278310               | -2.864090 | 0.925690  |
| 10               | 1                | 0              | -6.187521               | -0.707894 | 0.108460  |
| 11               | 1                | 0              | -4.639765               | 1.095885  | -0.605300 |
| 12               | 6                | 0              | -1.925449               | 1.070161  | -0.567868 |
| 13               | 1                | 0              | -2.487168               | 1.879659  | -1.067138 |
| 14               | 7                | 0              | -1.172680               | 1.584919  | 0.569127  |
| 15               | 8                | 0              | -0.929831               | 0.590047  | -1.463583 |
| 16               | 6                | 0              | 0.344431                | 1.155901  | -1.104434 |
| 17               | 6                | 0              | -0.006925               | 2.202757  | -0.056756 |
| 18               | 1                | 0              | 0.793168                | 2.361683  | 0.665605  |
| 19               | 1                | 0              | -0.267231               | 3.157119  | -0.541405 |
| 20               | 1                | 0              | 0.790405                | 1.582922  | -2.006138 |
| 21               | 6                | 0              | 1.218059                | 0.017249  | -0.583127 |
| 22               | 1                | 0              | 0.868221                | -0.266926 | 0.417857  |
| 23               | 6                | 0              | 2.698131                | 0.394259  | -0.468610 |
| 24               | 1                | 0              | 2.990099                | 0.983974  | -1.348243 |
| 25               | 6                | 0              | 3.578885                | -0.865976 | -0.471663 |
| 26               | 1                | 0              | 3.666959                | -1.200939 | -1.509297 |
| 27               | 6                | 0              | 4.974744                | -0.609364 | 0.076464  |

|    |   |   |           |           |           |
|----|---|---|-----------|-----------|-----------|
| 28 | 1 | 0 | 5.623612  | -1.455744 | -0.166629 |
| 29 | 1 | 0 | 5.402819  | 0.296859  | -0.354862 |
| 30 | 8 | 0 | 1.108355  | -1.092389 | -1.470290 |
| 31 | 1 | 0 | 0.172693  | -1.151765 | -1.704118 |
| 32 | 8 | 0 | 2.858424  | 1.206923  | 0.686184  |
| 33 | 1 | 0 | 3.518065  | 0.789038  | 1.257068  |
| 34 | 8 | 0 | 3.043000  | -1.905322 | 0.340477  |
| 35 | 1 | 0 | 2.228255  | -2.189987 | -0.090890 |
| 36 | 8 | 0 | 4.924385  | -0.420281 | 1.491779  |
| 37 | 1 | 0 | 4.472891  | -1.198726 | 1.842410  |
| 38 | 6 | 0 | -1.945195 | 2.499015  | 1.392312  |
| 39 | 1 | 0 | -2.817313 | 1.984118  | 1.801419  |
| 40 | 1 | 0 | -1.330669 | 2.843983  | 2.225496  |
| 41 | 1 | 0 | -2.290363 | 3.376967  | 0.822723  |

-----

**Structure 44b (<sup>2</sup>E ec-ec H-bond N) (M06-2X, DMSO)**

Energy (Hartrees): = - 976.8792163  
 No imaginary frequencies

Standard orientation:

| Center<br>Number | Atomic<br>Number | Atomic<br>Type | Coordinates (Angstroms) |           |           |
|------------------|------------------|----------------|-------------------------|-----------|-----------|
|                  |                  |                | X                       | Y         | Z         |
| 1                | 6                | 0              | -2.565982               | -0.298471 | -0.394745 |
| 2                | 6                | 0              | -1.903240               | -1.394327 | 0.159837  |
| 3                | 6                | 0              | -2.602379               | -2.563606 | 0.433713  |
| 4                | 6                | 0              | -3.967006               | -2.645389 | 0.158869  |
| 5                | 6                | 0              | -4.629362               | -1.554919 | -0.394047 |
| 6                | 6                | 0              | -3.926987               | -0.384726 | -0.674490 |
| 7                | 1                | 0              | -0.841960               | -1.321163 | 0.371594  |
| 8                | 1                | 0              | -2.085123               | -3.414386 | 0.862797  |
| 9                | 1                | 0              | -4.509914               | -3.558662 | 0.374460  |
| 10               | 1                | 0              | -5.689442               | -1.614494 | -0.612466 |
| 11               | 1                | 0              | -4.436895               | 0.466530  | -1.115164 |
| 12               | 6                | 0              | -1.821925               | 0.985050  | -0.660887 |
| 13               | 1                | 0              | -2.409697               | 1.616187  | -1.350081 |
| 14               | 7                | 0              | -1.526117               | 1.733889  | 0.563342  |
| 15               | 8                | 0              | -0.546598               | 0.732759  | -1.225524 |
| 16               | 6                | 0              | 0.402383                | 1.662323  | -0.677107 |
| 17               | 6                | 0              | -0.466204               | 2.639712  | 0.111724  |
| 18               | 1                | 0              | 0.053388                | 3.091253  | 0.958649  |
| 19               | 1                | 0              | -0.867452               | 3.432439  | -0.536497 |
| 20               | 1                | 0              | 0.947900                | 2.139382  | -1.492243 |
| 21               | 6                | 0              | 1.397879                | 0.925339  | 0.212329  |
| 22               | 1                | 0              | 2.120530                | 1.668365  | 0.575427  |
| 23               | 6                | 0              | 2.187488                | -0.125309 | -0.571189 |
| 24               | 1                | 0              | 1.488301                | -0.721752 | -1.167805 |
| 25               | 6                | 0              | 2.910557                | -1.093871 | 0.385228  |
| 26               | 1                | 0              | 2.208241                | -1.892606 | 0.642066  |
| 27               | 6                | 0              | 4.152744                | -1.713571 | -0.237640 |
| 28               | 1                | 0              | 4.484990                | -2.560298 | 0.370370  |
| 29               | 1                | 0              | 3.947304                | -2.065647 | -1.249340 |
| 30               | 8                | 0              | 0.762426                | 0.297164  | 1.322234  |
| 31               | 1                | 0              | -0.142123               | 0.655200  | 1.397641  |
| 32               | 8                | 0              | 3.045969                | 0.555551  | -1.477621 |
| 33               | 1                | 0              | 3.954556                | 0.442212  | -1.167845 |
| 34               | 8                | 0              | 3.376033                | -0.452833 | 1.570331  |
| 35               | 1                | 0              | 2.590495                | -0.155369 | 2.046440  |
| 36               | 8                | 0              | 5.190441                | -0.736892 | -0.329740 |
| 37               | 1                | 0              | 5.278166                | -0.371272 | 0.560042  |
| 38               | 6                | 0              | -2.683185               | 2.411990  | 1.126439  |
| 39               | 1                | 0              | -3.432813               | 1.678466  | 1.428733  |
| 40               | 1                | 0              | -2.374677               | 2.972992  | 2.009612  |
| 41               | 1                | 0              | -3.135805               | 3.108070  | 0.404568  |

-----

**Structure 44b (<sup>2</sup>E ax-ec) (M06-2X, DMSO)**

Energy (Hartrees): = - 976.8714809  
 No imaginary frequencies

Standard orientation:

| Center<br>Number | Atomic<br>Number | Atomic<br>Type | Coordinates (Angstroms) |           |           |
|------------------|------------------|----------------|-------------------------|-----------|-----------|
|                  |                  |                | X                       | Y         | Z         |
| 1                | 6                | 0              | 3.130082                | -0.088715 | -0.285505 |
| 2                | 6                | 0              | 3.075375                | 1.269699  | 0.014938  |
| 3                | 6                | 0              | 4.210004                | 1.925548  | 0.486749  |
| 4                | 6                | 0              | 5.399799                | 1.227353  | 0.663987  |
| 5                | 6                | 0              | 5.456094                | -0.132303 | 0.363853  |
| 6                | 6                | 0              | 4.325915                | -0.785989 | -0.112928 |
| 7                | 1                | 0              | 2.146311                | 1.810011  | -0.121260 |
| 8                | 1                | 0              | 4.162863                | 2.984002  | 0.716634  |

|    |   |   |           |           |           |
|----|---|---|-----------|-----------|-----------|
| 9  | 1 | 0 | 6.281593  | 1.739117  | 1.032267  |
| 10 | 1 | 0 | 6.381738  | -0.680251 | 0.497866  |
| 11 | 1 | 0 | 4.364903  | -1.844959 | -0.348911 |
| 12 | 6 | 0 | 1.917268  | -0.846075 | -0.757017 |
| 13 | 1 | 0 | 2.186762  | -1.472621 | -1.617595 |
| 14 | 7 | 0 | 1.322136  | -1.717560 | 0.244164  |
| 15 | 8 | 0 | 0.882228  | 0.052404  | -1.169151 |
| 16 | 6 | 0 | -0.351716 | -0.672337 | -1.115550 |
| 17 | 6 | 0 | 0.002883  | -1.973850 | -0.349800 |
| 18 | 1 | 0 | -0.731405 | -2.223326 | 0.412870  |
| 19 | 1 | 0 | 0.082557  | -2.801648 | -1.057508 |
| 20 | 1 | 0 | -0.678733 | -0.888463 | -2.139037 |
| 21 | 6 | 0 | -1.379799 | 0.239071  | -0.460686 |
| 22 | 1 | 0 | -1.133419 | 0.373607  | 0.599683  |
| 23 | 6 | 0 | -2.804967 | -0.318332 | -0.530282 |
| 24 | 1 | 0 | -2.972223 | -0.761682 | -1.521392 |
| 25 | 6 | 0 | -3.834993 | 0.811154  | -0.371838 |
| 26 | 1 | 0 | -3.905991 | 1.326456  | -1.334153 |
| 27 | 6 | 0 | -5.216527 | 0.299910  | 0.006913  |
| 28 | 1 | 0 | -5.951412 | 1.098996  | -0.126079 |
| 29 | 1 | 0 | -5.503279 | -0.547486 | -0.617794 |
| 30 | 8 | 0 | -1.366568 | 1.500967  | -1.125832 |
| 31 | 1 | 0 | -0.438220 | 1.740742  | -1.234893 |
| 32 | 8 | 0 | -2.920267 | -1.345329 | 0.445951  |
| 33 | 1 | 0 | -3.669701 | -1.132255 | 1.019590  |
| 34 | 8 | 0 | -3.479160 | 1.728867  | 0.657100  |
| 35 | 1 | 0 | -2.688386 | 2.185919  | 0.346181  |
| 36 | 8 | 0 | -5.223880 | -0.152402 | 1.361936  |
| 37 | 1 | 0 | -4.888817 | 0.587192  | 1.885038  |
| 38 | 6 | 0 | 1.227457  | -1.100739 | 1.572410  |
| 39 | 1 | 0 | 0.614504  | -1.743306 | 2.205820  |
| 40 | 1 | 0 | 2.221177  | -1.032916 | 2.018283  |
| 41 | 1 | 0 | 0.784146  | -0.096634 | 1.563738  |

-----

### Structure 44c (<sup>5</sup>C<sub>2</sub> ec-ec) (M06-2X, Gas Phase)

Energy (Hartrees): = - 976.8530072  
 No imaginary frequencies

Standard orientation:

| Center<br>Number | Atomic<br>Number | Atomic<br>Type | Coordinates (Angstroms) |           |           |
|------------------|------------------|----------------|-------------------------|-----------|-----------|
|                  |                  |                | X                       | Y         | Z         |
| 1                | 6                | 0              | -1.156791               | 1.401103  | 0.594021  |
| 2                | 6                | 0              | -0.046447               | 2.360963  | 0.188627  |
| 3                | 6                | 0              | -1.066396               | 0.152003  | -0.287530 |
| 4                | 1                | 0              | -0.064140               | 3.234883  | 0.843179  |
| 5                | 1                | 0              | -0.186706               | 2.700558  | -0.852806 |
| 6                | 1                | 0              | -2.133413               | 1.878043  | 0.486689  |
| 7                | 1                | 0              | -1.250009               | 0.451373  | -1.332099 |
| 8                | 8                | 0              | 0.235567                | -0.397182 | -0.181347 |
| 9                | 7                | 0              | 1.224408                | 1.661983  | 0.369192  |
| 10               | 6                | 0              | -2.046504               | -0.962043 | 0.074401  |
| 11               | 1                | 0              | -1.899379               | -1.778587 | -0.639449 |
| 12               | 6                | 0              | -3.510426               | -0.527958 | 0.007803  |
| 13               | 1                | 0              | -3.689689               | 0.272709  | 0.741074  |
| 14               | 6                | 0              | -3.973714               | -0.065832 | -1.362794 |
| 15               | 1                | 0              | -3.681102               | -0.822008 | -2.106384 |
| 16               | 1                | 0              | -3.504932               | 0.884005  | -1.632228 |
| 17               | 8                | 0              | -1.805933               | -1.518341 | 1.354145  |
| 18               | 1                | 0              | -1.625259               | -0.776306 | 1.947234  |
| 19               | 8                | 0              | -4.320908               | -1.644699 | 0.329433  |
| 20               | 1                | 0              | -3.909848               | -2.062184 | 1.095427  |
| 21               | 8                | 0              | -5.364883               | 0.147536  | -1.369425 |
| 22               | 1                | 0              | -5.749255               | -0.623244 | -0.937822 |
| 23               | 8                | 0              | -0.995707               | 1.060969  | 1.964512  |
| 24               | 1                | 0              | -0.040010               | 0.951256  | 2.079889  |
| 25               | 6                | 0              | 2.352664                | 2.563437  | 0.173950  |
| 26               | 1                | 0              | 2.423725                | 2.925109  | -0.865405 |
| 27               | 1                | 0              | 2.226796                | 3.426329  | 0.829097  |
| 28               | 1                | 0              | 3.284853                | 2.063714  | 0.432939  |
| 29               | 6                | 0              | 2.570655                | -0.247643 | -0.409833 |
| 30               | 6                | 0              | 2.814346                | -1.026672 | 0.719145  |
| 31               | 6                | 0              | 3.536666                | -0.150086 | -1.404700 |
| 32               | 6                | 0              | 4.025551                | -1.692042 | 0.853567  |
| 33               | 1                | 0              | 2.038965                | -1.120895 | 1.470181  |
| 34               | 6                | 0              | 4.751786                | -0.814603 | -1.269176 |
| 35               | 1                | 0              | 3.338779                | 0.447830  | -2.288635 |
| 36               | 6                | 0              | 4.997433                | -1.583410 | -0.138303 |
| 37               | 1                | 0              | 4.212834                | -2.300962 | 1.729963  |
| 38               | 1                | 0              | 5.501531                | -0.734656 | -2.047149 |
| 39               | 1                | 0              | 5.941754                | -2.103697 | -0.031025 |
| 40               | 6                | 0              | 1.266057                | 0.497974  | -0.524777 |
| 41               | 1                | 0              | 1.119282                | 0.835430  | -1.571972 |

-----

**Structure 44c ( $^5C_2$  ax-ec) (M06-2X, Gas Phase)**

Energy (Hartrees): = - 976.8498376

No imaginary frequencies

Standard orientation:

| Center<br>Number | Atomic<br>Number | Atomic<br>Type | Coordinates (Angstroms) |           |           |
|------------------|------------------|----------------|-------------------------|-----------|-----------|
|                  |                  |                | X                       | Y         | Z         |
| 1                | 6                | 0              | -1.052036               | 1.635453  | -0.104720 |
| 2                | 6                | 0              | 0.159522                | 2.369055  | -0.692867 |
| 3                | 6                | 0              | -0.946799               | 0.154015  | -0.487834 |
| 4                | 1                | 0              | 0.161517                | 3.402711  | -0.344075 |
| 5                | 1                | 0              | 0.072755                | 2.381876  | -1.786443 |
| 6                | 1                | 0              | -1.980354               | 2.052172  | -0.499661 |
| 7                | 1                | 0              | -0.992337               | 0.080974  | -1.586544 |
| 8                | 8                | 0              | 0.312446                | -0.340418 | -0.046261 |
| 9                | 7                | 0              | 1.437060                | 1.743027  | -0.348052 |
| 10               | 6                | 0              | -2.016844               | -0.781786 | 0.080359  |
| 11               | 1                | 0              | -1.691517               | -1.796414 | -0.173319 |
| 12               | 6                | 0              | -3.391455               | -0.539058 | -0.543609 |
| 13               | 1                | 0              | -3.303968               | -0.476898 | -1.637965 |
| 14               | 6                | 0              | -4.348237               | -1.666281 | -0.193021 |
| 15               | 1                | 0              | -4.322835               | -1.818570 | 0.890326  |
| 16               | 1                | 0              | -4.043330               | -2.588267 | -0.701025 |
| 17               | 8                | 0              | -2.108263               | -0.736758 | 1.485741  |
| 18               | 1                | 0              | -2.485769               | 0.128320  | 1.695885  |
| 19               | 8                | 0              | -3.888340               | 0.677891  | -0.020615 |
| 20               | 1                | 0              | -4.843330               | 0.653428  | -0.152346 |
| 21               | 8                | 0              | -5.633540               | -1.239748 | -0.627945 |
| 22               | 1                | 0              | -6.302244               | -1.784931 | -0.210365 |
| 23               | 8                | 0              | -1.097157               | 1.798537  | 1.305711  |
| 24               | 1                | 0              | -0.524890               | 1.119908  | 1.682881  |
| 25               | 6                | 0              | 1.918537                | 2.004481  | 1.010593  |
| 26               | 1                | 0              | 1.537942                | 1.294672  | 1.756044  |
| 27               | 1                | 0              | 3.008270                | 1.948262  | 1.031444  |
| 28               | 1                | 0              | 1.613138                | 3.006650  | 1.308751  |
| 29               | 6                | 0              | 2.683281                | -0.372265 | -0.372039 |
| 30               | 6                | 0              | 2.711161                | -1.522177 | 0.408658  |
| 31               | 6                | 0              | 3.872409                | 0.140163  | -0.891534 |
| 32               | 6                | 0              | 3.923763                | -2.156325 | 0.668324  |
| 33               | 1                | 0              | 1.783743                | -1.910935 | 0.808768  |
| 34               | 6                | 0              | 5.079078                | -0.494764 | -0.633124 |
| 35               | 1                | 0              | 3.839568                | 1.048193  | -1.484613 |
| 36               | 6                | 0              | 5.106901                | -1.647410 | 0.148644  |
| 37               | 1                | 0              | 3.940320                | -3.050717 | 1.280162  |
| 38               | 1                | 0              | 5.999484                | -0.091639 | -1.039081 |
| 39               | 1                | 0              | 6.048721                | -2.143332 | 0.351423  |
| 40               | 6                | 0              | 1.390098                | 0.340676  | -0.689825 |
| 41               | 1                | 0              | 1.208255                | 0.284654  | -1.774959 |

**Structure 44c ( $^5C_2$  ec-ec) (M06-2X, Benzene)**

Energy (Hartrees): = - 976.8737769

No imaginary frequencies

Standard orientation:

| Center<br>Number | Atomic<br>Number | Atomic<br>Type | Coordinates (Angstroms) |           |           |
|------------------|------------------|----------------|-------------------------|-----------|-----------|
|                  |                  |                | X                       | Y         | Z         |
| 1                | 6                | 0              | -1.154248               | 1.424496  | 0.564330  |
| 2                | 6                | 0              | -0.046316               | 2.372967  | 0.129374  |
| 3                | 6                | 0              | -1.066569               | 0.153646  | -0.285301 |
| 4                | 1                | 0              | -0.061014               | 3.265662  | 0.757995  |
| 5                | 1                | 0              | -0.192757               | 2.680809  | -0.920264 |
| 6                | 1                | 0              | -2.130262               | 1.900329  | 0.449289  |
| 7                | 1                | 0              | -1.253947               | 0.425433  | -1.335851 |
| 8                | 8                | 0              | 0.237516                | -0.392737 | -0.167264 |
| 9                | 7                | 0              | 1.227754                | 1.681235  | 0.323496  |
| 10               | 6                | 0              | -2.043118               | -0.953287 | 0.106170  |
| 11               | 1                | 0              | -1.889133               | -1.790812 | -0.581656 |
| 12               | 6                | 0              | -3.509506               | -0.529131 | 0.020704  |
| 13               | 1                | 0              | -3.694472               | 0.299723  | 0.719724  |
| 14               | 6                | 0              | -3.971060               | -0.128122 | -1.368451 |
| 15               | 1                | 0              | -3.675097               | -0.911309 | -2.081586 |
| 16               | 1                | 0              | -3.507017               | 0.811612  | -1.677378 |
| 17               | 8                | 0              | -1.805992               | -1.467235 | 1.406346  |
| 18               | 1                | 0              | -1.609980               | -0.704612 | 1.968762  |
| 19               | 8                | 0              | -4.316421               | -1.636920 | 0.389333  |
| 20               | 1                | 0              | -3.903269               | -2.017748 | 1.173596  |
| 21               | 8                | 0              | -5.366541               | 0.076376  | -1.388291 |
| 22               | 1                | 0              | -5.746950               | -0.681558 | -0.930583 |
| 23               | 8                | 0              | -0.986801               | 1.116952  | 1.944733  |

|    |   |   |           |           |           |
|----|---|---|-----------|-----------|-----------|
| 24 | 1 | 0 | -0.029451 | 1.017136  | 2.059422  |
| 25 | 6 | 0 | 2.350152  | 2.582460  | 0.094531  |
| 26 | 1 | 0 | 2.411273  | 2.918444  | -0.953701 |
| 27 | 1 | 0 | 2.226069  | 3.462025  | 0.728133  |
| 28 | 1 | 0 | 3.288870  | 2.097675  | 0.360242  |
| 29 | 6 | 0 | 2.571429  | -0.251078 | -0.404495 |
| 30 | 6 | 0 | 2.850181  | -0.927457 | 0.782179  |
| 31 | 6 | 0 | 3.497679  | -0.263198 | -1.440978 |
| 32 | 6 | 0 | 4.054343  | -1.602770 | 0.930420  |
| 33 | 1 | 0 | 2.110233  | -0.930656 | 1.574163  |
| 34 | 6 | 0 | 4.706429  | -0.938119 | -1.291977 |
| 35 | 1 | 0 | 3.275625  | 0.257576  | -2.366864 |
| 36 | 6 | 0 | 4.985085  | -1.607165 | -0.106330 |
| 37 | 1 | 0 | 4.267232  | -2.132169 | 1.851818  |
| 38 | 1 | 0 | 5.425464  | -0.944888 | -2.102762 |
| 39 | 1 | 0 | 5.924262  | -2.135293 | 0.010514  |
| 40 | 6 | 0 | 1.268256  | 0.495234  | -0.538883 |
| 41 | 1 | 0 | 1.119525  | 0.801628  | -1.594108 |

### Structure 44c (<sup>5</sup>C<sub>2</sub> ax-ec) (M06-2X, Benzene)

Energy (Hartrees): = - 976.8699568  
No imaginary frequencies

Standard orientation:

| Center Number | Atomic Number | Atomic Type | Coordinates (Angstroms) |           |           |
|---------------|---------------|-------------|-------------------------|-----------|-----------|
|               |               |             | X                       | Y         | Z         |
| 1             | 6             | 0           | -1.055867               | 1.626465  | -0.108504 |
| 2             | 6             | 0           | 0.153873                | 2.366233  | -0.691731 |
| 3             | 6             | 0           | -0.946473               | 0.147472  | -0.496495 |
| 4             | 1             | 0           | 0.153468                | 3.399413  | -0.340921 |
| 5             | 1             | 0           | 0.067635                | 2.380206  | -1.785003 |
| 6             | 1             | 0           | -1.983399               | 2.042723  | -0.506133 |
| 7             | 1             | 0           | -0.989344               | 0.078492  | -1.594729 |
| 8             | 8             | 0           | 0.314589                | -0.345288 | -0.052645 |
| 9             | 7             | 0           | 1.433710                | 1.742503  | -0.345972 |
| 10            | 6             | 0           | -2.017194               | -0.791789 | 0.063798  |
| 11            | 1             | 0           | -1.710052               | -1.804179 | -0.219218 |
| 12            | 6             | 0           | -3.398535               | -0.517294 | -0.533005 |
| 13            | 1             | 0           | -3.320022               | -0.392593 | -1.622227 |
| 14            | 6             | 0           | -4.352322               | -1.661841 | -0.238163 |
| 15            | 1             | 0           | -4.325066               | -1.875705 | 0.835074  |
| 16            | 1             | 0           | -4.051409               | -2.555718 | -0.795793 |
| 17            | 8             | 0           | -2.088208               | -0.777245 | 1.472755  |
| 18            | 1             | 0           | -2.496996               | 0.068904  | 1.700633  |
| 19            | 8             | 0           | -3.892962               | 0.669526  | 0.062767  |
| 20            | 1             | 0           | -4.850814               | 0.640917  | -0.050816 |
| 21            | 8             | 0           | -5.641952               | -1.214586 | -0.640969 |
| 22            | 1             | 0           | -6.306138               | -1.771529 | -0.228406 |
| 23            | 8             | 0           | -1.106682               | 1.784392  | 1.303781  |
| 24            | 1             | 0           | -0.533426               | 1.105136  | 1.678758  |
| 25            | 6             | 0           | 1.911179                | 2.004679  | 1.013149  |
| 26            | 1             | 0           | 1.522670                | 1.305424  | 1.764787  |
| 27            | 1             | 0           | 3.001017                | 1.942418  | 1.041181  |
| 28            | 1             | 0           | 1.617256                | 3.012844  | 1.304326  |
| 29            | 6             | 0           | 2.686341                | -0.371047 | -0.378063 |
| 30            | 6             | 0           | 2.723600                | -1.498712 | 0.434998  |
| 31            | 6             | 0           | 3.871419                | 0.127336  | -0.921481 |
| 32            | 6             | 0           | 3.938874                | -2.125817 | 0.701190  |
| 33            | 1             | 0           | 1.801130                | -1.879164 | 0.854602  |
| 34            | 6             | 0           | 5.081104                | -0.500159 | -0.656653 |
| 35            | 1             | 0           | 3.836162                | 1.018603  | -1.539701 |
| 36            | 6             | 0           | 5.117355                | -1.630146 | 0.157805  |
| 37            | 1             | 0           | 3.961024                | -3.003434 | 1.337140  |
| 38            | 1             | 0           | 5.997655                | -0.107060 | -1.081417 |
| 39            | 1             | 0           | 6.061510                | -2.120168 | 0.365508  |
| 40            | 6             | 0           | 1.390575                | 0.340192  | -0.693937 |
| 41            | 1             | 0           | 1.209323                | 0.289137  | -1.778805 |

### Structure 44c (<sup>5</sup>C<sub>2</sub> ec-ec) (M06-2X, DMSO)

Energy (Hartrees): = - 976.8798482  
No imaginary frequencies

Standard orientation:

| Center Number | Atomic Number | Atomic Type | Coordinates (Angstroms) |          |           |
|---------------|---------------|-------------|-------------------------|----------|-----------|
|               |               |             | X                       | Y        | Z         |
| 1             | 6             | 0           | -1.152752               | 1.417460 | 0.572665  |
| 2             | 6             | 0           | -0.049452               | 2.368166 | 0.136577  |
| 3             | 6             | 0           | -1.068859               | 0.153455 | -0.284852 |

|    |   |   |           |           |           |
|----|---|---|-----------|-----------|-----------|
| 4  | 1 | 0 | -0.060068 | 3.261038  | 0.764841  |
| 5  | 1 | 0 | -0.202557 | 2.672406  | -0.911597 |
| 6  | 1 | 0 | -2.128786 | 1.892984  | 0.463321  |
| 7  | 1 | 0 | -1.254588 | 0.434037  | -1.331762 |
| 8  | 8 | 0 | 0.237174  | -0.397886 | -0.167635 |
| 9  | 7 | 0 | 1.230856  | 1.680010  | 0.321211  |
| 10 | 6 | 0 | -2.045848 | -0.953467 | 0.101099  |
| 11 | 1 | 0 | -1.899341 | -1.786225 | -0.594122 |
| 12 | 6 | 0 | -3.511169 | -0.526425 | 0.024676  |
| 13 | 1 | 0 | -3.691958 | 0.300907  | 0.725525  |
| 14 | 6 | 0 | -3.970132 | -0.120769 | -1.362474 |
| 15 | 1 | 0 | -3.670290 | -0.897418 | -2.080190 |
| 16 | 1 | 0 | -3.507896 | 0.822388  | -1.660160 |
| 17 | 8 | 0 | -1.803873 | -1.475077 | 1.401417  |
| 18 | 1 | 0 | -1.586169 | -0.711545 | 1.956026  |
| 19 | 8 | 0 | -4.319434 | -1.636474 | 0.396323  |
| 20 | 1 | 0 | -3.910843 | -2.004081 | 1.189667  |
| 21 | 8 | 0 | -5.372108 | 0.075687  | -1.385235 |
| 22 | 1 | 0 | -5.747195 | -0.691064 | -0.937543 |
| 23 | 8 | 0 | -0.976755 | 1.098089  | 1.954088  |
| 24 | 1 | 0 | -0.017912 | 0.998877  | 2.060168  |
| 25 | 6 | 0 | 2.340847  | 2.588570  | 0.051044  |
| 26 | 1 | 0 | 2.378097  | 2.894569  | -1.006601 |
| 27 | 1 | 0 | 2.215560  | 3.483497  | 0.662477  |
| 28 | 1 | 0 | 3.290853  | 2.122450  | 0.313248  |
| 29 | 6 | 0 | 2.570434  | -0.249318 | -0.404270 |
| 30 | 6 | 0 | 2.873221  | -0.877667 | 0.804104  |
| 31 | 6 | 0 | 3.477490  | -0.303374 | -1.457027 |
| 32 | 6 | 0 | 4.078265  | -1.552754 | 0.955159  |
| 33 | 1 | 0 | 2.156600  | -0.836868 | 1.617241  |
| 34 | 6 | 0 | 4.687996  | -0.977045 | -1.305092 |
| 35 | 1 | 0 | 3.239235  | 0.186250  | -2.395860 |
| 36 | 6 | 0 | 4.989218  | -1.601205 | -0.099587 |
| 37 | 1 | 0 | 4.309766  | -2.042606 | 1.894211  |
| 38 | 1 | 0 | 5.392263  | -1.015013 | -2.128317 |
| 39 | 1 | 0 | 5.930007  | -2.126353 | 0.020217  |
| 40 | 6 | 0 | 1.266235  | 0.495466  | -0.542818 |
| 41 | 1 | 0 | 1.116248  | 0.800422  | -1.596155 |

-----

### Structure 44c (<sup>5</sup>C<sub>2</sub> ax-ec) (M06-2X, DMSO)

Energy (Hartrees): = - 976.874314

No imaginary frequencies

Standard orientation:

| Center<br>Number | Atomic<br>Number | Atomic<br>Type | Coordinates (Angstroms) |           |           |
|------------------|------------------|----------------|-------------------------|-----------|-----------|
|                  |                  |                | X                       | Y         | Z         |
| 1                | 6                | 0              | -1.059051               | 1.617931  | -0.109806 |
| 2                | 6                | 0              | 0.147722                | 2.358058  | -0.695643 |
| 3                | 6                | 0              | -0.947145               | 0.139318  | -0.492348 |
| 4                | 1                | 0              | 0.148613                | 3.393198  | -0.350106 |
| 5                | 1                | 0              | 0.055805                | 2.361874  | -1.787849 |
| 6                | 1                | 0              | -1.984065               | 2.030668  | -0.516380 |
| 7                | 1                | 0              | -0.986573               | 0.068820  | -1.589108 |
| 8                | 8                | 0              | 0.316925                | -0.350570 | -0.042892 |
| 9                | 7                | 0              | 1.432553                | 1.737606  | -0.351865 |
| 10               | 6                | 0              | -2.020087               | -0.796983 | 0.063164  |
| 11               | 1                | 0              | -1.728185               | -1.808951 | -0.234725 |
| 12               | 6                | 0              | -3.401210               | -0.502073 | -0.523332 |
| 13               | 1                | 0              | -3.316548               | -0.330530 | -1.604727 |
| 14               | 6                | 0              | -4.350466               | -1.660507 | -0.278877 |
| 15               | 1                | 0              | -4.332946               | -1.917443 | 0.785164  |
| 16               | 1                | 0              | -4.039637               | -2.530124 | -0.867284 |
| 17               | 8                | 0              | -2.083727               | -0.795983 | 1.476508  |
| 18               | 1                | 0              | -2.514512               | 0.038410  | 1.706776  |
| 19               | 8                | 0              | -3.905298               | 0.659963  | 0.120273  |
| 20               | 1                | 0              | -4.864642               | 0.613933  | 0.019602  |
| 21               | 8                | 0              | -5.642500               | -1.206963 | -0.671362 |
| 22               | 1                | 0              | -6.301902               | -1.777931 | -0.266139 |
| 23               | 8                | 0              | -1.118430               | 1.785059  | 1.303907  |
| 24               | 1                | 0              | -0.546721               | 1.107286  | 1.684671  |
| 25               | 6                | 0              | 1.904504                | 1.998326  | 1.009990  |
| 26               | 1                | 0              | 1.498761                | 1.311640  | 1.764355  |
| 27               | 1                | 0              | 2.993708                | 1.918353  | 1.045746  |
| 28               | 1                | 0              | 1.628988                | 3.014566  | 1.292174  |
| 29               | 6                | 0              | 2.687754                | -0.370956 | -0.378757 |
| 30               | 6                | 0              | 2.746309                | -1.455680 | 0.490550  |
| 31               | 6                | 0              | 3.859607                | 0.095213  | -0.977719 |
| 32               | 6                | 0              | 3.968475                | -2.070549 | 0.759378  |
| 33               | 1                | 0              | 1.836441                | -1.816260 | 0.953432  |
| 34               | 6                | 0              | 5.076519                | -0.518926 | -0.710607 |
| 35               | 1                | 0              | 3.811383                | 0.948127  | -1.647223 |
| 36               | 6                | 0              | 5.133784                | -1.605544 | 0.161138  |
| 37               | 1                | 0              | 4.006259                | -2.914747 | 1.438657  |

|    |   |   |          |           |           |
|----|---|---|----------|-----------|-----------|
| 38 | 1 | 0 | 5.981695 | -0.151042 | -1.180321 |
| 39 | 1 | 0 | 6.083100 | -2.085517 | 0.369929  |
| 40 | 6 | 0 | 1.387373 | 0.331496  | -0.694993 |
| 41 | 1 | 0 | 1.202818 | 0.275645  | -1.777896 |

### Structure 44d ( $^5\text{C}_2$ ec-ax) (M06-2X, Gas Phase)

Energy (Hartrees): = - 976.8471481  
No imaginary frequencies

Standard orientation:

| Center<br>Number | Atomic<br>Number | Atomic<br>Type | Coordinates (Angstroms) |           |           |
|------------------|------------------|----------------|-------------------------|-----------|-----------|
|                  |                  |                | X                       | Y         | Z         |
| 1                | 6                | 0              | 0.692316                | 1.437833  | 0.867396  |
| 2                | 6                | 0              | -0.726728               | 1.687378  | 1.377876  |
| 3                | 6                | 0              | 0.652657                | 0.329930  | -0.193401 |
| 4                | 1                | 0              | -0.717972               | 2.555659  | 2.040769  |
| 5                | 1                | 0              | -1.081692               | 0.815528  | 1.946797  |
| 6                | 1                | 0              | 1.348701                | 1.160444  | 1.694357  |
| 7                | 1                | 0              | 0.270771                | -0.590157 | 0.273028  |
| 8                | 8                | 0              | -0.224481               | 0.734809  | -1.238575 |
| 9                | 7                | 0              | -1.538436               | 2.004814  | 0.212587  |
| 10               | 6                | 0              | 1.996286                | 0.011986  | -0.842707 |
| 11               | 1                | 0              | 1.830518                | -0.791307 | -1.568470 |
| 12               | 6                | 0              | 3.056871                | -0.461786 | 0.151191  |
| 13               | 1                | 0              | 3.260521                | 0.335423  | 0.881859  |
| 14               | 6                | 0              | 2.707662                | -1.741544 | 0.890548  |
| 15               | 1                | 0              | 2.385632                | -2.495619 | 0.157144  |
| 16               | 1                | 0              | 1.889266                | -1.574233 | 1.595174  |
| 17               | 8                | 0              | 2.533634                | 1.095093  | -1.580202 |
| 18               | 1                | 0              | 2.374774                | 1.892388  | -1.056673 |
| 19               | 8                | 0              | 4.243456                | -0.746166 | -0.569974 |
| 20               | 1                | 0              | 4.356536                | -0.019021 | -1.193493 |
| 21               | 8                | 0              | 3.809265                | -2.194809 | 1.641101  |
| 22               | 1                | 0              | 4.569550                | -2.132383 | 1.052648  |
| 23               | 8                | 0              | 1.206629                | 2.637322  | 0.304319  |
| 24               | 1                | 0              | 0.493041                | 2.961802  | -0.263975 |
| 25               | 6                | 0              | -2.753744               | 2.768048  | 0.416876  |
| 26               | 1                | 0              | -3.532640               | 2.259807  | 0.999574  |
| 27               | 1                | 0              | -2.503484               | 3.699567  | 0.929826  |
| 28               | 1                | 0              | -3.178729               | 3.025344  | -0.556036 |
| 29               | 6                | 0              | -2.204346               | -0.376593 | -0.424696 |
| 30               | 6                | 0              | -3.037931               | -0.547505 | 0.676877  |
| 31               | 6                | 0              | -1.973921               | -1.466157 | -1.268806 |
| 32               | 6                | 0              | -3.632879               | -1.781406 | 0.931159  |
| 33               | 1                | 0              | -3.223842               | 0.274688  | 1.354614  |
| 34               | 6                | 0              | -2.564075               | -2.696528 | -1.015916 |
| 35               | 1                | 0              | -1.315382               | -1.338581 | -2.120783 |
| 36               | 6                | 0              | -3.398364               | -2.857782 | 0.086687  |
| 37               | 1                | 0              | -4.276776               | -1.897946 | 1.794779  |
| 38               | 1                | 0              | -2.372580               | -3.531786 | -1.679067 |
| 39               | 1                | 0              | -3.859329               | -3.817767 | 0.285730  |
| 40               | 6                | 0              | -1.551059               | 0.960577  | -0.793650 |
| 41               | 1                | 0              | -2.072317               | 1.365754  | -1.665877 |

### Structure 44d ( $^5\text{C}_2$ ax-ax) (M06-2X, Gas Phase)

Energy (Hartrees): = - 976.8497284  
No imaginary frequencies

Standard orientation:

| Center<br>Number | Atomic<br>Number | Atomic<br>Type | Coordinates (Angstroms) |           |           |
|------------------|------------------|----------------|-------------------------|-----------|-----------|
|                  |                  |                | X                       | Y         | Z         |
| 1                | 6                | 0              | -0.554079               | 1.382764  | -0.877353 |
| 2                | 6                | 0              | 0.881436                | 1.700098  | -1.307271 |
| 3                | 6                | 0              | -0.499594               | 0.211965  | 0.109069  |
| 4                | 1                | 0              | 0.884975                | 2.593936  | -1.932937 |
| 5                | 1                | 0              | 1.264487                | 0.864675  | -1.905430 |
| 6                | 1                | 0              | -1.158919               | 1.110834  | -1.744375 |
| 7                | 1                | 0              | -0.064404               | -0.654691 | -0.408789 |
| 8                | 8                | 0              | 0.341321                | 0.589362  | 1.198853  |
| 9                | 7                | 0              | 1.788319                | 1.914372  | -0.176831 |
| 10               | 6                | 0              | -1.830091               | -0.235235 | 0.717513  |
| 11               | 1                | 0              | -1.576035               | -0.956207 | 1.502398  |
| 12               | 6                | 0              | -2.730493               | -0.925529 | -0.308247 |
| 13               | 1                | 0              | -2.153389               | -1.664780 | -0.881734 |
| 14               | 6                | 0              | -3.886502               | -1.631431 | 0.380732  |
| 15               | 1                | 0              | -4.365578               | -0.924407 | 1.065103  |
| 16               | 1                | 0              | -3.515171               | -2.494612 | 0.945000  |
| 17               | 8                | 0              | -2.535988               | 0.806010  | 1.354219  |

|    |   |   |           |           |           |
|----|---|---|-----------|-----------|-----------|
| 18 | 1 | 0 | -2.855302 | 1.378776  | 0.643712  |
| 19 | 8 | 0 | -3.238890 | 0.075955  | -1.169463 |
| 20 | 1 | 0 | -4.030027 | -0.297631 | -1.575053 |
| 21 | 8 | 0 | -4.773994 | -2.035925 | -0.654393 |
| 22 | 1 | 0 | -5.622146 | -2.261736 | -0.269329 |
| 23 | 8 | 0 | -1.163105 | 2.521630  | -0.284245 |
| 24 | 1 | 0 | -0.955269 | 2.484082  | 0.657172  |
| 25 | 6 | 0 | 1.733927  | 3.239617  | 0.433766  |
| 26 | 1 | 0 | 0.904121  | 3.374909  | 1.138352  |
| 27 | 1 | 0 | 2.668604  | 3.423417  | 0.969640  |
| 28 | 1 | 0 | 1.635192  | 3.991810  | -0.348629 |
| 29 | 6 | 0 | 2.381730  | -0.428795 | 0.334436  |
| 30 | 6 | 0 | 3.399573  | -0.395295 | -0.614576 |
| 31 | 6 | 0 | 2.045257  | -1.644669 | 0.930015  |
| 32 | 6 | 0 | 4.064425  | -1.564142 | -0.973127 |
| 33 | 1 | 0 | 3.660188  | 0.555767  | -1.063669 |
| 34 | 6 | 0 | 2.709504  | -2.811434 | 0.572584  |
| 35 | 1 | 0 | 1.256373  | -1.665730 | 1.674020  |
| 36 | 6 | 0 | 3.720900  | -2.774287 | -0.382560 |
| 37 | 1 | 0 | 4.853655  | -1.526893 | -1.714900 |
| 38 | 1 | 0 | 2.439438  | -3.750543 | 1.041168  |
| 39 | 1 | 0 | 4.239489  | -3.683644 | -0.661973 |
| 40 | 6 | 0 | 1.690554  | 0.852045  | 0.791496  |
| 41 | 1 | 0 | 2.177460  | 1.191763  | 1.709434  |

#### Structure 44d ( $^5C_2$ ec-ax) (M06-2X, Benzene)

Energy (Hartrees): = - 976.8678135  
No imaginary frequencies

Standard orientation:

| Center<br>Number | Atomic<br>Number | Atomic<br>Type | Coordinates (Angstroms) |           |           |
|------------------|------------------|----------------|-------------------------|-----------|-----------|
|                  |                  |                | X                       | Y         | Z         |
| 1                | 6                | 0              | -0.679276               | -1.438720 | 0.878119  |
| 2                | 6                | 0              | 0.746709                | -1.674962 | 1.373044  |
| 3                | 6                | 0              | -0.659251               | -0.332324 | -0.185464 |
| 4                | 1                | 0              | 0.754334                | -2.536526 | 2.044616  |
| 5                | 1                | 0              | 1.107791                | -0.796161 | 1.927199  |
| 6                | 1                | 0              | -1.331540               | -1.167687 | 1.710090  |
| 7                | 1                | 0              | -0.287596               | 0.592074  | 0.279071  |
| 8                | 8                | 0              | 0.216465                | -0.724956 | -1.238069 |
| 9                | 7                | 0              | 1.543210                | -1.995863 | 0.198965  |
| 10               | 6                | 0              | -2.009702               | -0.030398 | -0.828779 |
| 11               | 1                | 0              | -1.853452               | 0.759688  | -1.570869 |
| 12               | 6                | 0              | -3.064989               | 0.458205  | 0.164638  |
| 13               | 1                | 0              | -3.245294               | -0.315407 | 0.925159  |
| 14               | 6                | 0              | -2.726096               | 1.767876  | 0.852763  |
| 15               | 1                | 0              | -2.434124               | 2.504917  | 0.090497  |
| 16               | 1                | 0              | -1.892274               | 1.640620  | 1.547036  |
| 17               | 8                | 0              | -2.549059               | -1.133116 | -1.539589 |
| 18               | 1                | 0              | -2.349872               | -1.921489 | -1.014783 |
| 19               | 8                | 0              | -4.268415               | 0.698793  | -0.548808 |
| 20               | 1                | 0              | -4.379369               | -0.054429 | -1.141464 |
| 21               | 8                | 0              | -3.824482               | 2.228069  | 1.609726  |
| 22               | 1                | 0              | -4.592293               | 2.140446  | 1.034032  |
| 23               | 8                | 0              | -1.183212               | -2.648163 | 0.319083  |
| 24               | 1                | 0              | -0.457858               | -2.975539 | -0.234170 |
| 25               | 6                | 0              | 2.749623                | -2.774985 | 0.400494  |
| 26               | 1                | 0              | 3.474769                | -2.333552 | 1.096004  |
| 27               | 1                | 0              | 2.478155                | -3.761374 | 0.786257  |
| 28               | 1                | 0              | 3.248767                | -2.917113 | -0.560487 |
| 29               | 6                | 0              | 2.203035                | 0.388605  | -0.432312 |
| 30               | 6                | 0              | 3.104724                | 0.527163  | 0.619962  |
| 31               | 6                | 0              | 1.914791                | 1.505964  | -1.221197 |
| 32               | 6                | 0              | 3.711043                | 1.754953  | 0.877846  |
| 33               | 1                | 0              | 3.337819                | -0.317807 | 1.254002  |
| 34               | 6                | 0              | 2.515323                | 2.731159  | -0.963487 |
| 35               | 1                | 0              | 1.207907                | 1.405534  | -2.037206 |
| 36               | 6                | 0              | 3.418081                | 2.859472  | 0.088647  |
| 37               | 1                | 0              | 4.409964                | 1.845480  | 1.701254  |
| 38               | 1                | 0              | 2.277893                | 3.588023  | -1.583516 |
| 39               | 1                | 0              | 3.888276                | 3.814750  | 0.290476  |
| 40               | 6                | 0              | 1.549185                | -0.948652 | -0.803323 |
| 41               | 1                | 0              | 2.065963                | -1.348569 | -1.680406 |

#### Structure 44d ( $^5C_2$ ax-ax) (M06-2X, Benzene)

Energy (Hartrees): = - 976.869529  
No imaginary frequencies

Standard orientation:



| Center<br>Number | Atomic<br>Number | Atomic<br>Type | Coordinates (Angstroms) |           |           |
|------------------|------------------|----------------|-------------------------|-----------|-----------|
|                  |                  |                | X                       | Y         | Z         |
| 1                | 6                | 0              | 0.571866                | 1.375646  | 0.875152  |
| 2                | 6                | 0              | -0.860423               | 1.701608  | 1.308478  |
| 3                | 6                | 0              | 0.510222                | 0.199002  | -0.103373 |
| 4                | 1                | 0              | -0.860305               | 2.597558  | 1.931219  |
| 5                | 1                | 0              | -1.242576               | 0.869714  | 1.911940  |
| 6                | 1                | 0              | 1.177350                | 1.107039  | 1.742831  |
| 7                | 1                | 0              | 0.078036                | -0.662967 | 0.423656  |
| 8                | 8                | 0              | -0.335583               | 0.570078  | -1.192573 |
| 9                | 7                | 0              | -1.768864               | 1.914131  | 0.179165  |
| 10               | 6                | 0              | 1.836820                | -0.256237 | -0.714441 |
| 11               | 1                | 0              | 1.581050                | -1.001915 | -1.474955 |
| 12               | 6                | 0              | 2.753830                | -0.911733 | 0.320031  |
| 13               | 1                | 0              | 2.178911                | -1.612736 | 0.940915  |
| 14               | 6                | 0              | 3.881919                | -1.667747 | -0.359841 |
| 15               | 1                | 0              | 4.365071                | -1.002960 | -1.083071 |
| 16               | 1                | 0              | 3.484407                | -2.546322 | -0.880627 |
| 17               | 8                | 0              | 2.527178                | 0.773925  | -1.388140 |
| 18               | 1                | 0              | 2.871193                | 1.351376  | -0.693171 |
| 19               | 8                | 0              | 3.298919                | 0.121532  | 1.123034  |
| 20               | 1                | 0              | 4.099180                | -0.245263 | 1.518062  |
| 21               | 8                | 0              | 4.783755                | -2.047266 | 0.673300  |
| 22               | 1                | 0              | 5.624208                | -2.288841 | 0.277430  |
| 23               | 8                | 0              | 1.185790                | 2.509017  | 0.272948  |
| 24               | 1                | 0              | 0.957030                | 2.476510  | -0.663986 |
| 25               | 6                | 0              | -1.722301               | 3.238093  | -0.433459 |
| 26               | 1                | 0              | -0.889523               | 3.385605  | -1.132881 |
| 27               | 1                | 0              | -2.654210               | 3.411758  | -0.978222 |
| 28               | 1                | 0              | -1.641853               | 3.994219  | 0.348205  |
| 29               | 6                | 0              | -2.391214               | -0.423592 | -0.324323 |
| 30               | 6                | 0              | -3.437127               | -0.364271 | 0.593706  |
| 31               | 6                | 0              | -2.054805               | -1.652805 | -0.892531 |
| 32               | 6                | 0              | -4.131306               | -1.518357 | 0.945398  |
| 33               | 1                | 0              | -3.699500               | 0.594702  | 1.025061  |
| 34               | 6                | 0              | -2.747603               | -2.805598 | -0.540957 |
| 35               | 1                | 0              | -1.246460               | -1.698147 | -1.614370 |
| 36               | 6                | 0              | -3.788713               | -2.741399 | 0.380486  |
| 37               | 1                | 0              | -4.942124               | -1.459565 | 1.662513  |
| 38               | 1                | 0              | -2.476829               | -3.754728 | -0.989189 |
| 39               | 1                | 0              | -4.330567               | -3.639377 | 0.653788  |
| 40               | 6                | 0              | -1.681798               | 0.847197  | -0.785068 |
| 41               | 1                | 0              | -2.167113               | 1.188285  | -1.703408 |

**Structure 44d ( $^5C_2$  ec-ax) (M06-2X, DMSO)**

Energy (Hartrees): = - 976.8726608  
 No imaginary frequencies

Standard orientation:

| Center<br>Number | Atomic<br>Number | Atomic<br>Type | Coordinates (Angstroms) |           |           |
|------------------|------------------|----------------|-------------------------|-----------|-----------|
|                  |                  |                | X                       | Y         | Z         |
| 1                | 6                | 0              | -0.711085               | -1.463247 | 0.858050  |
| 2                | 6                | 0              | 0.702350                | -1.712850 | 1.374186  |
| 3                | 6                | 0              | -0.663646               | -0.338126 | -0.183467 |
| 4                | 1                | 0              | 0.699948                | -2.586317 | 2.030186  |
| 5                | 1                | 0              | 1.043857                | -0.844583 | 1.953758  |
| 6                | 1                | 0              | -1.375425               | -1.202917 | 1.682972  |
| 7                | 1                | 0              | -0.284287               | 0.570631  | 0.304029  |
| 8                | 8                | 0              | 0.217959                | -0.726454 | -1.234533 |
| 9                | 7                | 0              | 1.523778                | -2.017676 | 0.209835  |
| 10               | 6                | 0              | -2.002051               | -0.004688 | -0.833619 |
| 11               | 1                | 0              | -1.828964               | 0.795600  | -1.560833 |
| 12               | 6                | 0              | -3.058419               | 0.483010  | 0.158512  |
| 13               | 1                | 0              | -3.253081               | -0.296266 | 0.908533  |
| 14               | 6                | 0              | -2.702406               | 1.778262  | 0.862357  |
| 15               | 1                | 0              | -2.391630               | 2.519220  | 0.112231  |
| 16               | 1                | 0              | -1.878232               | 1.624350  | 1.561409  |
| 17               | 8                | 0              | -2.550999               | -1.094238 | -1.564060 |
| 18               | 1                | 0              | -2.339967               | -1.891090 | -1.055310 |
| 19               | 8                | 0              | -4.256884               | 0.746198  | -0.561546 |
| 20               | 1                | 0              | -4.380622               | -0.010967 | -1.147084 |
| 21               | 8                | 0              | -3.803564               | 2.252635  | 1.616115  |
| 22               | 1                | 0              | -4.566127               | 2.185037  | 1.030285  |
| 23               | 8                | 0              | -1.212068               | -2.661283 | 0.263175  |
| 24               | 1                | 0              | -0.467325               | -2.993758 | -0.261529 |
| 25               | 6                | 0              | 2.761369                | -2.740942 | 0.441713  |
| 26               | 1                | 0              | 3.492699                | -2.214663 | 1.067432  |
| 27               | 1                | 0              | 2.528149                | -3.692170 | 0.926333  |
| 28               | 1                | 0              | 3.232297                | -2.956625 | -0.520420 |
| 29               | 6                | 0              | 2.209209                | 0.366439  | -0.416154 |
| 30               | 6                | 0              | 2.979803                | 0.557717  | 0.728633  |
| 31               | 6                | 0              | 2.055571                | 1.432595  | -1.308420 |

|    |   |   |          |           |           |
|----|---|---|----------|-----------|-----------|
| 32 | 6 | 0 | 3.585012 | 1.789581  | 0.977409  |
| 33 | 1 | 0 | 3.112004 | -0.242838 | 1.443953  |
| 34 | 6 | 0 | 2.657308 | 2.660045  | -1.062492 |
| 35 | 1 | 0 | 1.452327 | 1.292546  | -2.198937 |
| 36 | 6 | 0 | 3.426309 | 2.842698  | 0.085197  |
| 37 | 1 | 0 | 4.177192 | 1.922239  | 1.875808  |
| 38 | 1 | 0 | 2.527195 | 3.474673  | -1.765985 |
| 39 | 1 | 0 | 3.896878 | 3.799667  | 0.280077  |
| 40 | 6 | 0 | 1.546031 | -0.966424 | -0.786777 |
| 41 | 1 | 0 | 2.068981 | -1.367325 | -1.659740 |

### Structure 44d ( $^5C_2$ ax-ax) (M06-2X, DMSO)

Energy (Hartrees): = - 976.8734632  
No imaginary frequencies

Standard orientation:

| Center Number | Atomic Number | Atomic Type | Coordinates (Angstroms) |           |           |
|---------------|---------------|-------------|-------------------------|-----------|-----------|
|               |               |             | X                       | Y         | Z         |
| 1             | 6             | 0           | 0.567754                | 1.369928  | 0.876015  |
| 2             | 6             | 0           | -0.861671               | 1.701520  | 1.312929  |
| 3             | 6             | 0           | 0.499550                | 0.205917  | -0.114837 |
| 4             | 1             | 0           | -0.858897               | 2.593906  | 1.941100  |
| 5             | 1             | 0           | -1.240156               | 0.865950  | 1.913172  |
| 6             | 1             | 0           | 1.164545                | 1.084315  | 1.743893  |
| 7             | 1             | 0           | 0.064188                | -0.657646 | 0.405124  |
| 8             | 8             | 0           | -0.346518               | 0.593939  | -1.200303 |
| 9             | 7             | 0           | -1.777035               | 1.922033  | 0.188672  |
| 10            | 6             | 0           | 1.822921                | -0.256985 | -0.722731 |
| 11            | 1             | 0           | 1.570278                | -1.022337 | -1.463780 |
| 12            | 6             | 0           | 2.741823                | -0.889570 | 0.324017  |
| 13            | 1             | 0           | 2.157000                | -1.550171 | 0.977859  |
| 14            | 6             | 0           | 3.840637                | -1.698767 | -0.339075 |
| 15            | 1             | 0           | 4.339057                | -1.076455 | -1.089267 |
| 16            | 1             | 0           | 3.412362                | -2.581304 | -0.826218 |
| 17            | 8             | 0           | 2.509164                | 0.765204  | -1.419207 |
| 18            | 1             | 0           | 2.864454                | 1.343412  | -0.730803 |
| 19            | 8             | 0           | 3.324492                | 0.160295  | 1.083544  |
| 20            | 1             | 0           | 4.132983                | -0.210485 | 1.459463  |
| 21            | 8             | 0           | 4.744942                | -2.069252 | 0.697057  |
| 22            | 1             | 0           | 5.578163                | -2.330703 | 0.294097  |
| 23            | 8             | 0           | 1.201008                | 2.505105  | 0.291964  |
| 24            | 1             | 0           | 0.944509                | 2.507805  | -0.638725 |
| 25            | 6             | 0           | -1.716724               | 3.248491  | -0.420984 |
| 26            | 1             | 0           | -0.873134               | 3.394734  | -1.107856 |
| 27            | 1             | 0           | -2.637738               | 3.424268  | -0.982915 |
| 28            | 1             | 0           | -1.648655               | 4.001974  | 0.364849  |
| 29            | 6             | 0           | -2.389256               | -0.418068 | -0.327734 |
| 30            | 6             | 0           | -3.414010               | -0.382454 | 0.615750  |
| 31            | 6             | 0           | -2.054296               | -1.637488 | -0.919639 |
| 32            | 6             | 0           | -4.086524               | -1.549326 | 0.971622  |
| 33            | 1             | 0           | -3.678427               | 0.564822  | 1.071058  |
| 34            | 6             | 0           | -2.725712               | -2.802776 | -0.565719 |
| 35            | 1             | 0           | -1.257817               | -1.670561 | -1.655325 |
| 36            | 6             | 0           | -3.744087               | -2.762442 | 0.383588  |
| 37            | 1             | 0           | -4.879207               | -1.507845 | 1.710348  |
| 38            | 1             | 0           | -2.453185               | -3.743325 | -1.031154 |
| 39            | 1             | 0           | -4.267388               | -3.670333 | 0.661092  |
| 40            | 6             | 0           | -1.692189               | 0.861417  | -0.784181 |
| 41            | 1             | 0           | -2.187684               | 1.207021  | -1.695261 |

### Structure 45a ( $^2E$ ec-ax H-bond O) (M06-2X, Gas Phase)

Energy (Hartrees): = - 1091.3608722  
No imaginary frequencies

Standard orientation:

| Center Number | Atomic Number | Atomic Type | Coordinates (Angstroms) |           |           |
|---------------|---------------|-------------|-------------------------|-----------|-----------|
|               |               |             | X                       | Y         | Z         |
| 1             | 6             | 0           | -2.323908               | -0.031133 | 0.587357  |
| 2             | 6             | 0           | -2.545276               | -0.900583 | -0.484634 |
| 3             | 6             | 0           | -3.819711               | -1.105371 | -0.980349 |
| 4             | 6             | 0           | -4.912032               | -0.447024 | -0.408609 |
| 5             | 6             | 0           | -4.711931               | 0.407435  | 0.673762  |
| 6             | 6             | 0           | -3.420093               | 0.600820  | 1.159071  |
| 7             | 1             | 0           | -1.709750               | -1.439075 | -0.916348 |
| 8             | 1             | 0           | -4.006496               | -1.779348 | -1.807112 |
| 9             | 1             | 0           | -5.540220               | 0.915232  | 1.148708  |
| 10            | 1             | 0           | -3.273181               | 1.262011  | 2.008194  |
| 11            | 6             | 0           | -0.925344               | 0.270353  | 1.094866  |

|    |   |   |           |           |           |
|----|---|---|-----------|-----------|-----------|
| 12 | 1 | 0 | -0.966806 | 0.469988  | 2.171119  |
| 13 | 7 | 0 | -0.243287 | 1.384548  | 0.434396  |
| 14 | 8 | 0 | -0.063739 | -0.832559 | 0.859808  |
| 15 | 6 | 0 | 0.845945  | -0.519732 | -0.210741 |
| 16 | 6 | 0 | 0.332352  | 0.802586  | -0.768658 |
| 17 | 1 | 0 | 1.140244  | 1.422475  | -1.157299 |
| 18 | 1 | 0 | -0.417596 | 0.636008  | -1.558491 |
| 19 | 1 | 0 | 0.803715  | -1.343735 | -0.930134 |
| 20 | 6 | 0 | 2.246854  | -0.433968 | 0.388294  |
| 21 | 1 | 0 | 2.325959  | 0.505681  | 0.950102  |
| 22 | 6 | 0 | 3.355274  | -0.451534 | -0.667211 |
| 23 | 1 | 0 | 3.126058  | -1.229446 | -1.409553 |
| 24 | 6 | 0 | 4.700447  | -0.838896 | -0.023033 |
| 25 | 1 | 0 | 4.721966  | -1.930118 | 0.058381  |
| 26 | 6 | 0 | 5.894734  | -0.365906 | -0.842557 |
| 27 | 1 | 0 | 6.800852  | -0.871527 | -0.495131 |
| 28 | 1 | 0 | 5.750801  | -0.578523 | -1.902934 |
| 29 | 8 | 0 | 2.452215  | -1.549061 | 1.248169  |
| 30 | 1 | 0 | 1.618305  | -1.679363 | 1.716063  |
| 31 | 8 | 0 | 3.367208  | 0.792526  | -1.341863 |
| 32 | 1 | 0 | 4.204705  | 1.240132  | -1.157827 |
| 33 | 8 | 0 | 4.881940  | -0.250857 | 1.257163  |
| 34 | 1 | 0 | 4.233246  | -0.663456 | 1.839293  |
| 35 | 8 | 0 | 6.037007  | 1.043576  | -0.715079 |
| 36 | 1 | 0 | 6.049065  | 1.216053  | 0.234351  |
| 37 | 6 | 0 | -1.020061 | 2.587777  | 0.221028  |
| 38 | 1 | 0 | -1.420091 | 2.941426  | 1.174439  |
| 39 | 1 | 0 | -0.360618 | 3.361530  | -0.175523 |
| 40 | 1 | 0 | -1.859053 | 2.444641  | -0.476402 |
| 41 | 8 | 0 | -6.120084 | -0.711904 | -0.966511 |
| 42 | 6 | 0 | -7.247580 | -0.051285 | -0.432550 |
| 43 | 1 | 0 | -7.146052 | 1.035779  | -0.515794 |
| 44 | 1 | 0 | -8.098385 | -0.380473 | -1.024495 |
| 45 | 1 | 0 | -7.408049 | -0.322740 | 0.615909  |

#### Structure 45a (<sup>2</sup>E ec-ax H-bond N) (M06-2X, Gas Phase)

Energy (Hartrees): = - 1091.3633548  
 No imaginary frequencies

Standard orientation:

| Center Number | Atomic Number | Atomic Type | Coordinates (Angstroms) |           |           |
|---------------|---------------|-------------|-------------------------|-----------|-----------|
|               |               |             | X                       | Y         | Z         |
| 1             | 6             | 0           | 2.152773                | 0.091966  | -0.405762 |
| 2             | 6             | 0           | 2.422182                | -0.935678 | 0.502821  |
| 3             | 6             | 0           | 3.717211                | -1.369711 | 0.716085  |
| 4             | 6             | 0           | 4.778844                | -0.790073 | 0.014945  |
| 5             | 6             | 0           | 4.524018                | 0.219721  | -0.911403 |
| 6             | 6             | 0           | 3.212317                | 0.644493  | -1.112129 |
| 7             | 1             | 0           | 1.599853                | -1.416348 | 1.019826  |
| 8             | 1             | 0           | 3.940965                | -2.170032 | 1.410358  |
| 9             | 1             | 0           | 5.322955                | 0.671470  | -1.483088 |
| 10            | 1             | 0           | 3.020619                | 1.422642  | -1.845216 |
| 11            | 6             | 0           | 0.747700                | 0.627095  | -0.594904 |
| 12            | 1             | 0           | 0.622380                | 0.979058  | -1.625057 |
| 13            | 7             | 0           | 0.378920                | 1.734447  | 0.315384  |
| 14            | 8             | 0           | -0.207961               | -0.373496 | -0.319540 |
| 15            | 6             | 0           | -0.951853               | -0.043346 | 0.859406  |
| 16            | 6             | 0           | -0.119556               | 1.058059  | 1.510889  |
| 17            | 1             | 0           | -0.721877               | 1.740880  | 2.114648  |
| 18            | 1             | 0           | 0.692577                | 0.650956  | 2.131275  |
| 19            | 1             | 0           | -1.048005               | -0.942710 | 1.470526  |
| 20            | 6             | 0           | -2.351766               | 0.425929  | 0.478645  |
| 21            | 1             | 0           | -2.888379               | 0.662101  | 1.408593  |
| 22            | 6             | 0           | -3.131657               | -0.695500 | -0.208209 |
| 23            | 1             | 0           | -2.494602               | -1.132911 | -0.985252 |
| 24            | 6             | 0           | -4.389449               | -0.132151 | -0.898022 |
| 25            | 1             | 0           | -4.094590               | 0.205469  | -1.896527 |
| 26            | 6             | 0           | -5.499884               | -1.168305 | -1.016746 |
| 27            | 1             | 0           | -6.260603               | -0.812531 | -1.718633 |
| 28            | 1             | 0           | -5.106538               | -2.123343 | -1.367227 |
| 29            | 8             | 0           | -2.327515               | 1.563196  | -0.372970 |
| 30            | 1             | 0           | -1.453613               | 1.984147  | -0.294330 |
| 31            | 8             | 0           | -3.380750               | -1.703932 | 0.755417  |
| 32            | 1             | 0           | -4.324559               | -1.707409 | 0.963706  |
| 33            | 8             | 0           | -4.976324               | 0.945871  | -0.177196 |
| 34            | 1             | 0           | -4.342755               | 1.673481  | -0.206439 |
| 35            | 8             | 0           | -6.078515               | -1.396931 | 0.262533  |
| 36            | 1             | 0           | -6.301658               | -0.520916 | 0.599907  |
| 37            | 6             | 0           | 1.397445                | 2.740592  | 0.560495  |
| 38            | 1             | 0           | 1.729258                | 3.166584  | -0.388588 |
| 39            | 1             | 0           | 0.960648                | 3.542099  | 1.158536  |
| 40            | 1             | 0           | 2.273166                | 2.336476  | 1.085908  |
| 41            | 8             | 0           | 6.010135                | -1.284831 | 0.293382  |

|    |   |   |          |           |           |
|----|---|---|----------|-----------|-----------|
| 42 | 6 | 0 | 7.108029 | -0.751540 | -0.416617 |
| 43 | 1 | 0 | 7.224327 | 0.319484  | -0.221548 |
| 44 | 1 | 0 | 7.986255 | -1.281494 | -0.055480 |
| 45 | 1 | 0 | 7.001049 | -0.916599 | -1.493562 |

-----  
**Structure 45a (<sup>2</sup>E ec-ec) (M06-2X, Gas Phase)**

Energy (Hartrees): = - 1091.3632652  
 No imaginary frequencies

Standard orientation:

| Center<br>Number | Atomic<br>Number | Atomic<br>Type | Coordinates (Angstroms) |           |           |
|------------------|------------------|----------------|-------------------------|-----------|-----------|
|                  |                  |                | X                       | Y         | Z         |
| 1                | 6                | 0              | -2.402084               | 0.157767  | 0.194682  |
| 2                | 6                | 0              | -2.920786               | 0.081770  | -1.102190 |
| 3                | 6                | 0              | -4.251386               | -0.217175 | -1.306775 |
| 4                | 6                | 0              | -5.097776               | -0.445228 | -0.213384 |
| 5                | 6                | 0              | -4.593356               | -0.372231 | 1.081713  |
| 6                | 6                | 0              | -3.243072               | -0.071611 | 1.269639  |
| 7                | 1                | 0              | -2.259609               | 0.271781  | -1.939624 |
| 8                | 1                | 0              | -4.676251               | -0.281735 | -2.300811 |
| 9                | 1                | 0              | -5.225442               | -0.546307 | 1.941436  |
| 10               | 1                | 0              | -2.848645               | -0.016634 | 2.279222  |
| 11               | 6                | 0              | -0.952473               | 0.493255  | 0.395684  |
| 12               | 1                | 0              | -0.724975               | 0.523804  | 1.480681  |
| 13               | 7                | 0              | -0.559742               | 1.735965  | -0.247760 |
| 14               | 8                | 0              | -0.118763               | -0.478959 | -0.220991 |
| 15               | 6                | 0              | 1.070173                | 0.170683  | -0.694888 |
| 16               | 6                | 0              | 0.891919                | 1.634888  | -0.299543 |
| 17               | 1                | 0              | 1.356903                | 1.828458  | 0.681271  |
| 18               | 1                | 0              | 1.324283                | 2.326053  | -1.022689 |
| 19               | 1                | 0              | 1.100645                | 0.045432  | -1.782549 |
| 20               | 6                | 0              | 2.260092                | -0.539518 | -0.076071 |
| 21               | 1                | 0              | 2.267732                | -0.343885 | 1.004973  |
| 22               | 6                | 0              | 3.591018                | -0.057389 | -0.648229 |
| 23               | 1                | 0              | 3.509975                | -0.021159 | -1.743158 |
| 24               | 6                | 0              | 4.718023                | -1.055479 | -0.314307 |
| 25               | 1                | 0              | 4.702468                | -1.837774 | -1.080048 |
| 26               | 6                | 0              | 6.089103                | -0.391937 | -0.288518 |
| 27               | 1                | 0              | 6.868684                | -1.159917 | -0.296441 |
| 28               | 1                | 0              | 6.223102                | 0.263552  | -1.150115 |
| 29               | 8                | 0              | 2.153507                | -1.937207 | -0.319169 |
| 30               | 1                | 0              | 1.229020                | -2.168869 | -0.168998 |
| 31               | 8                | 0              | 3.816363                | 1.265782  | -0.199735 |
| 32               | 1                | 0              | 4.557365                | 1.260536  | 0.421994  |
| 33               | 8                | 0              | 4.570780                | -1.635360 | 0.974715  |
| 34               | 1                | 0              | 3.780420                | -2.187357 | 0.936922  |
| 35               | 8                | 0              | 6.205650                | 0.418441  | 0.874498  |
| 36               | 1                | 0              | 5.979504                | -0.158594 | 1.614074  |
| 37               | 6                | 0              | -1.048584               | 2.916684  | 0.435365  |
| 38               | 1                | 0              | -0.674657               | 2.983360  | 1.471625  |
| 39               | 1                | 0              | -0.727390               | 3.807613  | -0.105926 |
| 40               | 1                | 0              | -2.139720               | 2.901146  | 0.455987  |
| 41               | 8                | 0              | -6.388706               | -0.725829 | -0.520715 |
| 42               | 6                | 0              | -7.282679               | -0.949246 | 0.548715  |
| 43               | 1                | 0              | -8.253039               | -1.138586 | 0.095647  |
| 44               | 1                | 0              | -6.981971               | -1.818518 | 1.142441  |
| 45               | 1                | 0              | -7.349648               | -0.070487 | 1.198233  |

-----  
**Structure 45a (E<sub>2</sub> ax-ax) (M06-2X, Gas Phase)**

Energy (Hartrees): = - 1091.3632357  
 No imaginary frequencies

Standard orientation:

| Center<br>Number | Atomic<br>Number | Atomic<br>Type | Coordinates (Angstroms) |           |           |
|------------------|------------------|----------------|-------------------------|-----------|-----------|
|                  |                  |                | X                       | Y         | Z         |
| 1                | 6                | 0              | -2.346886               | 0.632529  | 0.486047  |
| 2                | 6                | 0              | -2.664542               | -0.489573 | 1.255423  |
| 3                | 6                | 0              | -3.827385               | -1.200613 | 1.019996  |
| 4                | 6                | 0              | -4.701954               | -0.801410 | 0.005971  |
| 5                | 6                | 0              | -4.394326               | 0.314513  | -0.770421 |
| 6                | 6                | 0              | -3.219129               | 1.020375  | -0.521947 |
| 7                | 1                | 0              | -1.983416               | -0.805590 | 2.036781  |
| 8                | 1                | 0              | -4.087258               | -2.074742 | 1.604253  |
| 9                | 1                | 0              | -5.049241               | 0.640264  | -1.566935 |
| 10               | 1                | 0              | -2.962683               | 1.879002  | -1.131407 |
| 11               | 6                | 0              | -1.090677               | 1.437842  | 0.769672  |
| 12               | 1                | 0              | -1.290533               | 2.228418  | 1.496940  |
| 13               | 7                | 0              | -0.522480               | 1.987541  | -0.439660 |
| 14               | 8                | 0              | -0.072589               | 0.602206  | 1.337517  |

|    |   |   |           |           |           |
|----|---|---|-----------|-----------|-----------|
| 15 | 6 | 0 | 0.610113  | -0.012178 | 0.237479  |
| 16 | 6 | 0 | 0.196086  | 0.832312  | -0.998086 |
| 17 | 1 | 0 | 1.055034  | 1.145893  | -1.587966 |
| 18 | 1 | 0 | -0.479018 | 0.257072  | -1.632864 |
| 19 | 1 | 0 | 0.269715  | -1.050667 | 0.147314  |
| 20 | 6 | 0 | 2.091836  | -0.001025 | 0.583960  |
| 21 | 1 | 0 | 2.470446  | 1.028044  | 0.522960  |
| 22 | 6 | 0 | 2.937473  | -0.848852 | -0.368043 |
| 23 | 1 | 0 | 2.428060  | -1.807813 | -0.538852 |
| 24 | 6 | 0 | 4.296854  | -1.177570 | 0.276102  |
| 25 | 1 | 0 | 4.141227  | -2.022614 | 0.953947  |
| 26 | 6 | 0 | 5.357222  | -1.542221 | -0.754941 |
| 27 | 1 | 0 | 6.214782  | -1.999829 | -0.252606 |
| 28 | 1 | 0 | 4.961293  | -2.242093 | -1.492493 |
| 29 | 8 | 0 | 2.270770  | -0.511740 | 1.900515  |
| 30 | 1 | 0 | 1.559524  | -0.136231 | 2.432684  |
| 31 | 8 | 0 | 3.021572  | -0.172651 | -1.608270 |
| 32 | 1 | 0 | 3.950341  | 0.021824  | -1.796814 |
| 33 | 8 | 0 | 4.842367  | -0.075199 | 0.987794  |
| 34 | 1 | 0 | 4.274611  | 0.060107  | 1.755390  |
| 35 | 8 | 0 | 5.763452  | -0.376171 | -1.461127 |
| 36 | 1 | 0 | 6.007186  | 0.264901  | -0.782313 |
| 37 | 6 | 0 | 0.359486  | 3.120765  | -0.159886 |
| 38 | 1 | 0 | 0.844716  | 3.429470  | -1.086057 |
| 39 | 1 | 0 | -0.239064 | 3.958576  | 0.202133  |
| 40 | 1 | 0 | 1.134372  | 2.894956  | 0.585433  |
| 41 | 8 | 0 | -5.815670 | -1.562557 | -0.147255 |
| 42 | 6 | 0 | -6.725092 | -1.195591 | -1.162293 |
| 43 | 1 | 0 | -6.256152 | -1.241317 | -2.150664 |
| 44 | 1 | 0 | -7.536921 | -1.917743 | -1.113946 |
| 45 | 1 | 0 | -7.123360 | -0.189594 | -0.994903 |

### Structure 45a (<sup>2</sup>E ec-ax H-bond O) (M06-2X, Benzene)

Energy (Hartrees): = - 1091.3801918  
No imaginary frequencies

Standard orientation:

| Center<br>Number | Atomic<br>Number | Atomic<br>Type | Coordinates (Angstroms) |           |           |
|------------------|------------------|----------------|-------------------------|-----------|-----------|
|                  |                  |                | X                       | Y         | Z         |
| 1                | 6                | 0              | -2.327849               | -0.040008 | 0.572986  |
| 2                | 6                | 0              | -2.553318               | -0.861559 | -0.535805 |
| 3                | 6                | 0              | -3.831549               | -1.053119 | -1.028698 |
| 4                | 6                | 0              | -4.923995               | -0.429244 | -0.417873 |
| 5                | 6                | 0              | -4.718992               | 0.376975  | 0.700707  |
| 6                | 6                | 0              | -3.423629               | 0.559174  | 1.181558  |
| 7                | 1                | 0              | -1.719724               | -1.374313 | -1.002049 |
| 8                | 1                | 0              | -4.018833               | -1.690480 | -1.884552 |
| 9                | 1                | 0              | -5.546343               | 0.857951  | 1.204954  |
| 10               | 1                | 0              | -3.273754               | 1.182055  | 2.058805  |
| 11               | 6                | 0              | -0.927230               | 0.250069  | 1.081584  |
| 12               | 1                | 0              | -0.966120               | 0.427451  | 2.161509  |
| 13               | 7                | 0              | -0.244952               | 1.377226  | 0.442580  |
| 14               | 8                | 0              | -0.067025               | -0.849865 | 0.820846  |
| 15               | 6                | 0              | 0.849812                | -0.513986 | -0.237547 |
| 16               | 6                | 0              | 0.338040                | 0.819652  | -0.768853 |
| 17               | 1                | 0              | 1.145832                | 1.450277  | -1.139729 |
| 18               | 1                | 0              | -0.406232               | 0.670404  | -1.566905 |
| 19               | 1                | 0              | 0.811453                | -1.320951 | -0.975776 |
| 20               | 6                | 0              | 2.247246                | -0.442267 | 0.373499  |
| 21               | 1                | 0              | 2.321937                | 0.482176  | 0.960788  |
| 22               | 6                | 0              | 3.366459                | -0.434208 | -0.671491 |
| 23               | 1                | 0              | 3.143072                | -1.187898 | -1.439696 |
| 24               | 6                | 0              | 4.705843                | -0.842424 | -0.028016 |
| 25               | 1                | 0              | 4.725748                | -1.935359 | 0.024424  |
| 26               | 6                | 0              | 5.908894                | -0.359090 | -0.826307 |
| 27               | 1                | 0              | 6.809658                | -0.874134 | -0.478525 |
| 28               | 1                | 0              | 5.778230                | -0.556511 | -1.891406 |
| 29               | 8                | 0              | 2.445219                | -1.578755 | 1.208512  |
| 30               | 1                | 0              | 1.612349                | -1.709052 | 1.678817  |
| 31               | 8                | 0              | 3.391113                | 0.832183  | -1.308033 |
| 32               | 1                | 0              | 4.231510                | 1.263910  | -1.101482 |
| 33               | 8                | 0              | 4.880296                | -0.286560 | 1.268925  |
| 34               | 1                | 0              | 4.220199                | -0.705672 | 1.833701  |
| 35               | 8                | 0              | 6.059787                | 1.049747  | -0.675740 |
| 36               | 1                | 0              | 6.078480                | 1.207887  | 0.276362  |
| 37               | 6                | 0              | -1.022018               | 2.583785  | 0.248756  |
| 38               | 1                | 0              | -1.429164               | 2.919097  | 1.205904  |
| 39               | 1                | 0              | -0.361169               | 3.367350  | -0.127097 |
| 40               | 1                | 0              | -1.854528               | 2.457149  | -0.459630 |
| 41               | 8                | 0              | -6.134143               | -0.675472 | -0.975252 |
| 42               | 6                | 0              | -7.266341               | -0.069699 | -0.381298 |
| 43               | 1                | 0              | -7.189753               | 1.022187  | -0.400260 |
| 44               | 1                | 0              | -8.122132               | -0.377629 | -0.978867 |

45 1 0 -7.406260 -0.411011 0.649381

**Structure 45a (<sup>2</sup>E ec-ax H-bond N) (M06-2X, Benzene)**

Energy (Hartrees): = - 1091.3836678  
 No imaginary frequencies

Standard orientation:

| Center Number | Atomic Number | Atomic Type | Coordinates (Angstroms) |           |           |
|---------------|---------------|-------------|-------------------------|-----------|-----------|
|               |               |             | X                       | Y         | Z         |
| 1             | 6             | 0           | 2.155978                | 0.084370  | -0.407690 |
| 2             | 6             | 0           | 2.428813                | -0.948105 | 0.494441  |
| 3             | 6             | 0           | 3.725745                | -1.380240 | 0.704580  |
| 4             | 6             | 0           | 4.786541                | -0.791149 | 0.009243  |
| 5             | 6             | 0           | 4.528066                | 0.224626  | -0.910657 |
| 6             | 6             | 0           | 3.215018                | 0.646362  | -1.109320 |
| 7             | 1             | 0           | 1.610099                | -1.432587 | 1.014164  |
| 8             | 1             | 0           | 3.948487                | -2.184387 | 1.395423  |
| 9             | 1             | 0           | 5.326389                | 0.683917  | -1.477941 |
| 10            | 1             | 0           | 3.021461                | 1.430409  | -1.835633 |
| 11            | 6             | 0           | 0.750165                | 0.620217  | -0.595039 |
| 12            | 1             | 0           | 0.626865                | 0.974745  | -1.624199 |
| 13            | 7             | 0           | 0.376215                | 1.720977  | 0.318032  |
| 14            | 8             | 0           | -0.207278               | -0.383759 | -0.324032 |
| 15            | 6             | 0           | -0.945900               | -0.059878 | 0.861532  |
| 16            | 6             | 0           | -0.113062               | 1.039696  | 1.514712  |
| 17            | 1             | 0           | -0.713345               | 1.718714  | 2.124474  |
| 18            | 1             | 0           | 0.701963                | 0.631283  | 2.129512  |
| 19            | 1             | 0           | -1.035399               | -0.960785 | 1.471017  |
| 20            | 6             | 0           | -2.347483               | 0.413491  | 0.488884  |
| 21            | 1             | 0           | -2.877603               | 0.646121  | 1.423131  |
| 22            | 6             | 0           | -3.138618               | -0.696392 | -0.205163 |
| 23            | 1             | 0           | -2.507737               | -1.139102 | -0.984060 |
| 24            | 6             | 0           | -4.390456               | -0.119107 | -0.894385 |
| 25            | 1             | 0           | -4.091564               | 0.221874  | -1.890343 |
| 26            | 6             | 0           | -5.509036               | -1.142759 | -1.029663 |
| 27            | 1             | 0           | -6.266084               | -0.768674 | -1.726041 |
| 28            | 1             | 0           | -5.126652               | -2.094745 | -1.400513 |
| 29            | 8             | 0           | -2.319669               | 1.559162  | -0.353323 |
| 30            | 1             | 0           | -1.437821               | 1.967802  | -0.275014 |
| 31            | 8             | 0           | -3.403851               | -1.708614 | 0.754106  |
| 32            | 1             | 0           | -4.350032               | -1.701628 | 0.951146  |
| 33            | 8             | 0           | -4.971244               | 0.959202  | -0.166483 |
| 34            | 1             | 0           | -4.326659               | 1.677876  | -0.182201 |
| 35            | 8             | 0           | -6.094783               | -1.391326 | 0.245357  |
| 36            | 1             | 0           | -6.324171               | -0.521347 | 0.594728  |
| 37            | 6             | 0           | 1.378555                | 2.744192  | 0.555730  |
| 38            | 1             | 0           | 1.697932                | 3.176049  | -0.395240 |
| 39            | 1             | 0           | 0.930737                | 3.539689  | 1.154310  |
| 40            | 1             | 0           | 2.263282                | 2.359749  | 1.080791  |
| 41            | 8             | 0           | 6.018600                | -1.281040 | 0.284939  |
| 42            | 6             | 0           | 7.119853                | -0.722554 | -0.406444 |
| 43            | 1             | 0           | 7.222805                | 0.346872  | -0.196251 |
| 44            | 1             | 0           | 8.001656                | -1.244672 | -0.040250 |
| 45            | 1             | 0           | 7.032595                | -0.879629 | -1.486317 |

**Structure 45a (<sup>2</sup>E ec-ec) (M06-2X, Benzene)**

Energy (Hartrees): = - 1091.3830329  
 No imaginary frequencies

Standard orientation:

| Center Number | Atomic Number | Atomic Type | Coordinates (Angstroms) |           |           |
|---------------|---------------|-------------|-------------------------|-----------|-----------|
|               |               |             | X                       | Y         | Z         |
| 1             | 6             | 0           | -2.397878               | 0.159821  | 0.174339  |
| 2             | 6             | 0           | -2.950389               | 0.164586  | -1.110905 |
| 3             | 6             | 0           | -4.284859               | -0.130620 | -1.300367 |
| 4             | 6             | 0           | -5.102134               | -0.436678 | -0.202956 |
| 5             | 6             | 0           | -4.563300               | -0.444505 | 1.080922  |
| 6             | 6             | 0           | -3.210619               | -0.146025 | 1.253358  |
| 7             | 1             | 0           | -2.316370               | 0.413313  | -1.954526 |
| 8             | 1             | 0           | -4.731672               | -0.130870 | -2.287220 |
| 9             | 1             | 0           | -5.170970               | -0.679739 | 1.944225  |
| 10            | 1             | 0           | -2.791219               | -0.154056 | 2.254376  |
| 11            | 6             | 0           | -0.944593               | 0.488217  | 0.365745  |
| 12            | 1             | 0           | -0.700973               | 0.469061  | 1.446540  |
| 13            | 7             | 0           | -0.557766               | 1.758962  | -0.225569 |
| 14            | 8             | 0           | -0.122810               | -0.455466 | -0.309920 |
| 15            | 6             | 0           | 1.077152                | 0.208151  | -0.738787 |
| 16            | 6             | 0           | 0.894957                | 1.658965  | -0.294663 |
| 17            | 1             | 0           | 1.365431                | 1.823628  | 0.687967  |

|    |   |   |           |           |           |
|----|---|---|-----------|-----------|-----------|
| 18 | 1 | 0 | 1.316083  | 2.374832  | -1.000497 |
| 19 | 1 | 0 | 1.127509  | 0.118904  | -1.828800 |
| 20 | 6 | 0 | 2.253654  | -0.526905 | -0.120182 |
| 21 | 1 | 0 | 2.240010  | -0.366054 | 0.966471  |
| 22 | 6 | 0 | 3.601572  | -0.040823 | -0.649652 |
| 23 | 1 | 0 | 3.546198  | 0.030011  | -1.744082 |
| 24 | 6 | 0 | 4.713326  | -1.058138 | -0.319883 |
| 25 | 1 | 0 | 4.711042  | -1.817614 | -1.108276 |
| 26 | 6 | 0 | 6.090798  | -0.413911 | -0.247411 |
| 27 | 1 | 0 | 6.859952  | -1.192630 | -0.250348 |
| 28 | 1 | 0 | 6.258843  | 0.252864  | -1.094380 |
| 29 | 8 | 0 | 2.142335  | -1.916509 | -0.409304 |
| 30 | 1 | 0 | 1.216640  | -2.149429 | -0.266573 |
| 31 | 8 | 0 | 3.831569  | 1.266388  | -0.152959 |
| 32 | 1 | 0 | 4.563916  | 1.229342  | 0.477885  |
| 33 | 8 | 0 | 4.531775  | -1.672807 | 0.949970  |
| 34 | 1 | 0 | 3.733561  | -2.210379 | 0.879962  |
| 35 | 8 | 0 | 6.194034  | 0.374672  | 0.935072  |
| 36 | 1 | 0 | 5.954982  | -0.214829 | 1.661075  |
| 37 | 6 | 0 | -1.029824 | 2.907959  | 0.521801  |
| 38 | 1 | 0 | -0.660159 | 2.910519  | 1.561433  |
| 39 | 1 | 0 | -0.690019 | 3.822635  | 0.033237  |
| 40 | 1 | 0 | -2.121388 | 2.915255  | 0.538802  |
| 41 | 8 | 0 | -6.397301 | -0.705087 | -0.493458 |
| 42 | 6 | 0 | -7.267214 | -0.999345 | 0.583028  |
| 43 | 1 | 0 | -8.247950 | -1.164109 | 0.141034  |
| 44 | 1 | 0 | -6.954009 | -1.904645 | 1.112688  |
| 45 | 1 | 0 | -7.325791 | -0.162775 | 1.286468  |

-----

### Structure 45a (E<sub>2</sub> ax-ax) (M06-2X, Benzene)

Energy (Hartrees): = - 1091.3824218  
 No imaginary frequencies

Standard orientation:

| Center<br>Number | Atomic<br>Number | Atomic<br>Type | Coordinates (Angstroms) |           |           |
|------------------|------------------|----------------|-------------------------|-----------|-----------|
|                  |                  |                | X                       | Y         | Z         |
| 1                | 6                | 0              | -2.355469               | 0.631198  | 0.491306  |
| 2                | 6                | 0              | -2.683298               | -0.485481 | 1.265237  |
| 3                | 6                | 0              | -3.849524               | -1.191541 | 1.029082  |
| 4                | 6                | 0              | -4.718793               | -0.794047 | 0.008985  |
| 5                | 6                | 0              | -4.402871               | 0.318116  | -0.770380 |
| 6                | 6                | 0              | -3.224531               | 1.019068  | -0.520225 |
| 7                | 1                | 0              | -2.008604               | -0.804243 | 2.051374  |
| 8                | 1                | 0              | -4.112683               | -2.062132 | 1.618061  |
| 9                | 1                | 0              | -5.054372               | 0.644794  | -1.569772 |
| 10               | 1                | 0              | -2.965630               | 1.875421  | -1.132313 |
| 11               | 6                | 0              | -1.092451               | 1.427428  | 0.775810  |
| 12               | 1                | 0              | -1.286386               | 2.211874  | 1.510874  |
| 13               | 7                | 0              | -0.524010               | 1.987514  | -0.428816 |
| 14               | 8                | 0              | -0.077559               | 0.580455  | 1.332352  |
| 15               | 6                | 0              | 0.611617                | -0.018081 | 0.226744  |
| 16               | 6                | 0              | 0.200263                | 0.841354  | -0.998482 |
| 17               | 1                | 0              | 1.060440                | 1.168964  | -1.579139 |
| 18               | 1                | 0              | -0.467096               | 0.271209  | -1.646219 |
| 19               | 1                | 0              | 0.275893                | -1.056438 | 0.120626  |
| 20               | 6                | 0              | 2.092231                | -0.005880 | 0.580713  |
| 21               | 1                | 0              | 2.464053                | 1.026452  | 0.541545  |
| 22               | 6                | 0              | 2.949355                | -0.834550 | -0.378997 |
| 23               | 1                | 0              | 2.443361                | -1.789909 | -0.576450 |
| 24               | 6                | 0              | 4.302173                | -1.175473 | 0.271335  |
| 25               | 1                | 0              | 4.138008                | -2.024782 | 0.941122  |
| 26               | 6                | 0              | 5.368277                | -1.545339 | -0.750220 |
| 27               | 1                | 0              | 6.220845                | -2.003920 | -0.240149 |
| 28               | 1                | 0              | 4.978788                | -2.250244 | -1.486652 |
| 29               | 8                | 0              | 2.264843                | -0.538455 | 1.890597  |
| 30               | 1                | 0              | 1.560722                | -0.158058 | 2.429274  |
| 31               | 8                | 0              | 3.050655                | -0.128067 | -1.603677 |
| 32               | 1                | 0              | 3.985585                | 0.039866  | -1.786811 |
| 33               | 8                | 0              | 4.848678                | -0.079256 | 0.994482  |
| 34               | 1                | 0              | 4.274024                | 0.054687  | 1.757306  |
| 35               | 8                | 0              | 5.787340                | -0.383356 | -1.460965 |
| 36               | 1                | 0              | 6.040293                | 0.257359  | -0.784677 |
| 37               | 6                | 0              | 0.351971                | 3.123310  | -0.139786 |
| 38               | 1                | 0              | 0.834952                | 3.444599  | -1.063358 |
| 39               | 1                | 0              | -0.250185               | 3.955217  | 0.230730  |
| 40               | 1                | 0              | 1.130160                | 2.896591  | 0.601893  |
| 41               | 8                | 0              | -5.832902               | -1.550408 | -0.146044 |
| 42               | 6                | 0              | -6.720815               | -1.209765 | -1.193279 |
| 43               | 1                | 0              | -6.227397               | -1.271383 | -2.168554 |
| 44               | 1                | 0              | -7.526368               | -1.940772 | -1.152923 |
| 45               | 1                | 0              | -7.137588               | -0.206958 | -1.055094 |

**Structure 45a (<sup>2</sup>E ec-ax H-bond O) (M06-2X, DMSO)**

Energy (Hartrees): = - 1091.3841915  
 No imaginary frequencies

Standard orientation:

| Center<br>Number | Atomic<br>Number | Atomic<br>Type | Coordinates (Angstroms) |           |           |
|------------------|------------------|----------------|-------------------------|-----------|-----------|
|                  |                  |                | X                       | Y         | Z         |
| 1                | 6                | 0              | -2.331445               | -0.042158 | 0.575174  |
| 2                | 6                | 0              | -2.543044               | -0.843712 | -0.551420 |
| 3                | 6                | 0              | -3.818761               | -1.036928 | -1.054548 |
| 4                | 6                | 0              | -4.920722               | -0.434146 | -0.437034 |
| 5                | 6                | 0              | -4.727633               | 0.354137  | 0.697915  |
| 6                | 6                | 0              | -3.435924               | 0.537723  | 1.189237  |
| 7                | 1                | 0              | -1.703839               | -1.336545 | -1.030149 |
| 8                | 1                | 0              | -3.990990               | -1.659120 | -1.925293 |
| 9                | 1                | 0              | -5.561431               | 0.821223  | 1.205101  |
| 10               | 1                | 0              | -3.294025               | 1.148072  | 2.076591  |
| 11               | 6                | 0              | -0.937795               | 0.253412  | 1.099154  |
| 12               | 1                | 0              | -0.990891               | 0.429509  | 2.177887  |
| 13               | 7                | 0              | -0.257495               | 1.387356  | 0.465463  |
| 14               | 8                | 0              | -0.068147               | -0.841498 | 0.845515  |
| 15               | 6                | 0              | 0.845740                | -0.504471 | -0.216995 |
| 16               | 6                | 0              | 0.331700                | 0.829268  | -0.744871 |
| 17               | 1                | 0              | 1.136063                | 1.464930  | -1.114532 |
| 18               | 1                | 0              | -0.410313               | 0.678961  | -1.543947 |
| 19               | 1                | 0              | 0.806235                | -1.307069 | -0.959280 |
| 20               | 6                | 0              | 2.244455                | -0.437496 | 0.390173  |
| 21               | 1                | 0              | 2.318329                | 0.469961  | 1.003473  |
| 22               | 6                | 0              | 3.359116                | -0.387520 | -0.659298 |
| 23               | 1                | 0              | 3.123951                | -1.092255 | -1.468485 |
| 24               | 6                | 0              | 4.695425                | -0.844853 | -0.050179 |
| 25               | 1                | 0              | 4.683223                | -1.938110 | -0.016644 |
| 26               | 6                | 0              | 5.898204                | -0.397310 | -0.867186 |
| 27               | 1                | 0              | 6.788435                | -0.939211 | -0.534989 |
| 28               | 1                | 0              | 5.742424                | -0.594724 | -1.928929 |
| 29               | 8                | 0              | 2.451387                | -1.593737 | 1.196621  |
| 30               | 1                | 0              | 1.632361                | -1.717146 | 1.693015  |
| 31               | 8                | 0              | 3.397700                | 0.922578  | -1.209261 |
| 32               | 1                | 0              | 4.285870                | 1.279948  | -1.070884 |
| 33               | 8                | 0              | 4.909061                | -0.310637 | 1.251898  |
| 34               | 1                | 0              | 4.247450                | -0.721050 | 1.821553  |
| 35               | 8                | 0              | 6.099091                | 1.009722  | -0.723524 |
| 36               | 1                | 0              | 6.153213                | 1.169368  | 0.227620  |
| 37               | 6                | 0              | -1.055517               | 2.579980  | 0.255435  |
| 38               | 1                | 0              | -1.496320               | 2.900817  | 1.202426  |
| 39               | 1                | 0              | -0.404325               | 3.379082  | -0.104884 |
| 40               | 1                | 0              | -1.865482               | 2.436224  | -0.475430 |
| 41               | 8                | 0              | -6.126352               | -0.678550 | -1.002507 |
| 42               | 6                | 0              | -7.267287               | -0.091992 | -0.393294 |
| 43               | 1                | 0              | -7.198304               | 0.999789  | -0.391020 |
| 44               | 1                | 0              | -8.120861               | -0.396707 | -0.995506 |
| 45               | 1                | 0              | -7.399291               | -0.454059 | 0.630555  |

**Structure 45a (<sup>2</sup>E ec-ax H-bond N) (M06-2X, DMSO)**

Energy (Hartrees): = - 1091.3880806  
 No imaginary frequencies

Standard orientation:

| Center<br>Number | Atomic<br>Number | Atomic<br>Type | Coordinates (Angstroms) |           |           |
|------------------|------------------|----------------|-------------------------|-----------|-----------|
|                  |                  |                | X                       | Y         | Z         |
| 1                | 6                | 0              | 2.158812                | 0.083085  | -0.404863 |
| 2                | 6                | 0              | 2.433777                | -0.939698 | 0.508266  |
| 3                | 6                | 0              | 3.732226                | -1.373172 | 0.716367  |
| 4                | 6                | 0              | 4.791925                | -0.793230 | 0.009707  |
| 5                | 6                | 0              | 4.531020                | 0.217639  | -0.916656 |
| 6                | 6                | 0              | 3.217374                | 0.639691  | -1.113809 |
| 7                | 1                | 0              | 1.620343                | -1.413315 | 1.046720  |
| 8                | 1                | 0              | 3.952095                | -2.169063 | 1.418493  |
| 9                | 1                | 0              | 5.328453                | 0.673984  | -1.488050 |
| 10               | 1                | 0              | 3.021679                | 1.422001  | -1.841365 |
| 11               | 6                | 0              | 0.754003                | 0.619576  | -0.599490 |
| 12               | 1                | 0              | 0.640898                | 0.977321  | -1.628007 |
| 13               | 7                | 0              | 0.373683                | 1.714137  | 0.314899  |
| 14               | 8                | 0              | -0.206715               | -0.388717 | -0.338486 |
| 15               | 6                | 0              | -0.940228               | -0.073161 | 0.855451  |
| 16               | 6                | 0              | -0.108950               | 1.025306  | 1.510845  |
| 17               | 1                | 0              | -0.708113               | 1.699010  | 2.126884  |
| 18               | 1                | 0              | 0.709222                | 0.615269  | 2.119252  |
| 19               | 1                | 0              | -1.019980               | -0.975175 | 1.464160  |
| 20               | 6                | 0              | -2.343886               | 0.402454  | 0.493322  |



|    |   |   |           |           |           |
|----|---|---|-----------|-----------|-----------|
| 21 | 1 | 0 | -2.864657 | 0.629854  | 1.433716  |
| 22 | 6 | 0 | -3.145994 | -0.693198 | -0.209872 |
| 23 | 1 | 0 | -2.526060 | -1.130666 | -1.000117 |
| 24 | 6 | 0 | -4.398178 | -0.101654 | -0.885747 |
| 25 | 1 | 0 | -4.102336 | 0.250105  | -1.878475 |
| 26 | 6 | 0 | -5.520260 | -1.116954 | -1.039026 |
| 27 | 1 | 0 | -6.279487 | -0.722667 | -1.721118 |
| 28 | 1 | 0 | -5.142498 | -2.058420 | -1.439722 |
| 29 | 8 | 0 | -2.315515 | 1.557559  | -0.338150 |
| 30 | 1 | 0 | -1.427895 | 1.957529  | -0.256672 |
| 31 | 8 | 0 | -3.417103 | -1.718844 | 0.737663  |
| 32 | 1 | 0 | -4.364715 | -1.704419 | 0.928111  |
| 33 | 8 | 0 | -4.971684 | 0.969615  | -0.139578 |
| 34 | 1 | 0 | -4.314864 | 1.677699  | -0.134576 |
| 35 | 8 | 0 | -6.102601 | -1.400452 | 0.233681  |
| 36 | 1 | 0 | -6.340230 | -0.541137 | 0.604792  |
| 37 | 6 | 0 | 1.374789  | 2.739375  | 0.555004  |
| 38 | 1 | 0 | 1.706368  | 3.159459  | -0.396979 |
| 39 | 1 | 0 | 0.921738  | 3.538672  | 1.144246  |
| 40 | 1 | 0 | 2.250882  | 2.355827  | 1.095344  |
| 41 | 8 | 0 | 6.024629  | -1.281613 | 0.281359  |
| 42 | 6 | 0 | 7.125419  | -0.706609 | -0.407841 |
| 43 | 1 | 0 | 7.211603  | 0.363038  | -0.195261 |
| 44 | 1 | 0 | 8.011918  | -1.219341 | -0.040015 |
| 45 | 1 | 0 | 7.040671  | -0.861605 | -1.487508 |

-----

**Structure 45a (<sup>2</sup>E ec-ec) (M06-2X, DMSO)**

Energy (Hartrees): = - 1091.3868453  
 No imaginary frequencies

Standard orientation:

| Center<br>Number | Atomic<br>Number | Atomic<br>Type | Coordinates (Angstroms) |           |           |
|------------------|------------------|----------------|-------------------------|-----------|-----------|
|                  |                  |                | X                       | Y         | Z         |
| 1                | 6                | 0              | -2.413227               | 0.142355  | 0.180267  |
| 2                | 6                | 0              | -2.920475               | -0.006238 | -1.115612 |
| 3                | 6                | 0              | -4.254289               | -0.301835 | -1.317954 |
| 4                | 6                | 0              | -5.117040               | -0.452330 | -0.221782 |
| 5                | 6                | 0              | -4.623071               | -0.307291 | 1.073273  |
| 6                | 6                | 0              | -3.270682               | -0.011536 | 1.258362  |
| 7                | 1                | 0              | -2.254417               | 0.119663  | -1.962345 |
| 8                | 1                | 0              | -4.661721               | -0.419328 | -2.315538 |
| 9                | 1                | 0              | -5.267649               | -0.418728 | 1.934742  |
| 10               | 1                | 0              | -2.886713               | 0.101571  | 2.267436  |
| 11               | 6                | 0              | -0.963730               | 0.484854  | 0.380772  |
| 12               | 1                | 0              | -0.739088               | 0.533544  | 1.462649  |
| 13               | 7                | 0              | -0.575607               | 1.723738  | -0.280853 |
| 14               | 8                | 0              | -0.131112               | -0.494824 | -0.227970 |
| 15               | 6                | 0              | 1.068497                | 0.148196  | -0.693443 |
| 16               | 6                | 0              | 0.879628                | 1.619804  | -0.331091 |
| 17               | 1                | 0              | 1.333499                | 1.835799  | 0.648713  |
| 18               | 1                | 0              | 1.305391                | 2.298139  | -1.070460 |
| 19               | 1                | 0              | 1.121670                | -0.001287 | -1.776721 |
| 20               | 6                | 0              | 2.253798                | -0.537525 | -0.035006 |
| 21               | 1                | 0              | 2.246996                | -0.302953 | 1.037770  |
| 22               | 6                | 0              | 3.591541                | -0.077347 | -0.612054 |
| 23               | 1                | 0              | 3.522127                | -0.068742 | -1.708317 |
| 24               | 6                | 0              | 4.709215                | -1.068631 | -0.247465 |
| 25               | 1                | 0              | 4.640608                | -1.909154 | -0.944208 |
| 26               | 6                | 0              | 6.096619                | -0.455736 | -0.359751 |
| 27               | 1                | 0              | 6.851233                | -1.246748 | -0.320847 |
| 28               | 1                | 0              | 6.205351                | 0.087732  | -1.299558 |
| 29               | 8                | 0              | 2.153529                | -1.944798 | -0.226564 |
| 30               | 1                | 0              | 1.241679                | -2.180370 | -0.014831 |
| 31               | 8                | 0              | 3.821591                | 1.253514  | -0.172209 |
| 32               | 1                | 0              | 4.655492                | 1.267571  | 0.317536  |
| 33               | 8                | 0              | 4.609775                | -1.530587 | 1.095721  |
| 34               | 1                | 0              | 3.809922                | -2.068291 | 1.139592  |
| 35               | 8                | 0              | 6.312021                | 0.480110  | 0.697819  |
| 36               | 1                | 0              | 6.137815                | -0.003976 | 1.515124  |
| 37               | 6                | 0              | -1.042313               | 2.907265  | 0.420305  |
| 38               | 1                | 0              | -0.668418               | 2.948291  | 1.456418  |
| 39               | 1                | 0              | -0.700961               | 3.799724  | -0.107037 |
| 40               | 1                | 0              | -2.134272               | 2.919899  | 0.442386  |
| 41               | 8                | 0              | -6.405966               | -0.733333 | -0.521516 |
| 42               | 6                | 0              | -7.314223               | -0.886276 | 0.559893  |
| 43               | 1                | 0              | -8.285463               | -1.083084 | 0.110363  |
| 44               | 1                | 0              | -7.032310               | -1.728835 | 1.198217  |
| 45               | 1                | 0              | -7.371722               | 0.026361  | 1.160347  |

-----

**Structure 45a (E<sub>2</sub> ax-ax) (M06-2X, DMSO)**

Energy (Hartrees): = - 1091.3855272

No imaginary frequencies

Standard orientation:

| Center<br>Number | Atomic<br>Number | Atomic<br>Type | Coordinates (Angstroms) |           |           |
|------------------|------------------|----------------|-------------------------|-----------|-----------|
|                  |                  |                | X                       | Y         | Z         |
| 1                | 6                | 0              | -2.354670               | 0.597546  | 0.485243  |
| 2                | 6                | 0              | -2.602490               | -0.621035 | 1.122209  |
| 3                | 6                | 0              | -3.764299               | -1.331603 | 0.867463  |
| 4                | 6                | 0              | -4.712626               | -0.833755 | -0.031818 |
| 5                | 6                | 0              | -4.477666               | 0.383366  | -0.674072 |
| 6                | 6                | 0              | -3.302635               | 1.083979  | -0.408724 |
| 7                | 1                | 0              | -1.873598               | -1.016076 | 1.820613  |
| 8                | 1                | 0              | -3.959386               | -2.279374 | 1.355999  |
| 9                | 1                | 0              | -5.190977               | 0.791832  | -1.377923 |
| 10               | 1                | 0              | -3.119755               | 2.024302  | -0.916497 |
| 11               | 6                | 0              | -1.102285               | 1.402512  | 0.795502  |
| 12               | 1                | 0              | -1.314412               | 2.170962  | 1.541857  |
| 13               | 7                | 0              | -0.535714               | 1.997116  | -0.396076 |
| 14               | 8                | 0              | -0.081187               | 0.558513  | 1.338008  |
| 15               | 6                | 0              | 0.619780                | -0.011225 | 0.223822  |
| 16               | 6                | 0              | 0.209724                | 0.872117  | -0.984118 |
| 17               | 1                | 0              | 1.071210                | 1.229260  | -1.545081 |
| 18               | 1                | 0              | -0.440733               | 0.306525  | -1.653598 |
| 19               | 1                | 0              | 0.291391                | -1.048572 | 0.089177  |
| 20               | 6                | 0              | 2.097955                | -0.004681 | 0.586411  |
| 21               | 1                | 0              | 2.464964                | 1.029661  | 0.590716  |
| 22               | 6                | 0              | 2.961600                | -0.798081 | -0.397618 |
| 23               | 1                | 0              | 2.455177                | -1.742012 | -0.640041 |
| 24               | 6                | 0              | 4.306841                | -1.170299 | 0.247856  |
| 25               | 1                | 0              | 4.131231                | -2.035403 | 0.893455  |
| 26               | 6                | 0              | 5.371058                | -1.534514 | -0.776119 |
| 27               | 1                | 0              | 6.215686                | -2.012559 | -0.271665 |
| 28               | 1                | 0              | 4.974052                | -2.223670 | -1.523051 |
| 29               | 8                | 0              | 2.262929                | -0.586604 | 1.877428  |
| 30               | 1                | 0              | 1.580619                | -0.195858 | 2.437020  |
| 31               | 8                | 0              | 3.082960                | -0.038707 | -1.592411 |
| 32               | 1                | 0              | 4.024237                | 0.105726  | -1.762544 |
| 33               | 8                | 0              | 4.863111                | -0.096163 | 0.999065  |
| 34               | 1                | 0              | 4.281734                | 0.031305  | 1.758205  |
| 35               | 8                | 0              | 5.810682                | -0.365091 | -1.468864 |
| 36               | 1                | 0              | 6.082763                | 0.257093  | -0.781889 |
| 37               | 6                | 0              | 0.335256                | 3.130187  | -0.069472 |
| 38               | 1                | 0              | 0.798370                | 3.497615  | -0.986266 |
| 39               | 1                | 0              | -0.268674               | 3.935021  | 0.353696  |
| 40               | 1                | 0              | 1.128823                | 2.874311  | 0.644922  |
| 41               | 8                | 0              | -5.817021               | -1.595665 | -0.215948 |
| 42               | 6                | 0              | -6.807715               | -1.110764 | -1.110672 |
| 43               | 1                | 0              | -6.410518               | -1.010841 | -2.125138 |
| 44               | 1                | 0              | -7.603731               | -1.852899 | -1.107151 |
| 45               | 1                | 0              | -7.207224               | -0.148904 | -0.775858 |

### Structure 45b (<sup>2</sup>E ec-ec H-bond O) (M06-2X, Gas Phase)

Energy (Hartrees): = - 1091.3649362

No imaginary frequencies

Standard orientation:

| Center<br>Number | Atomic<br>Number | Atomic<br>Type | Coordinates (Angstroms) |           |           |
|------------------|------------------|----------------|-------------------------|-----------|-----------|
|                  |                  |                | X                       | Y         | Z         |
| 1                | 6                | 0              | -2.151431               | 0.732373  | -0.233311 |
| 2                | 6                | 0              | -1.875586               | -0.553967 | 0.243179  |
| 3                | 6                | 0              | -2.895694               | -1.455559 | 0.462356  |
| 4                | 6                | 0              | -4.224582               | -1.087300 | 0.211855  |
| 5                | 6                | 0              | -4.512744               | 0.190246  | -0.258394 |
| 6                | 6                | 0              | -3.466146               | 1.087724  | -0.479188 |
| 7                | 1                | 0              | -0.846294               | -0.830175 | 0.446396  |
| 8                | 1                | 0              | -2.705736               | -2.456004 | 0.830749  |
| 9                | 1                | 0              | -5.529269               | 0.498518  | -0.459860 |
| 10               | 1                | 0              | -3.691057               | 2.081500  | -0.852963 |
| 11               | 6                | 0              | -1.019495               | 1.692649  | -0.471716 |
| 12               | 1                | 0              | -1.417021               | 2.650133  | -0.860472 |
| 13               | 7                | 0              | -0.202199               | 1.906183  | 0.711267  |
| 14               | 8                | 0              | -0.109131               | 1.168659  | -1.433675 |
| 15               | 6                | 0              | 1.236360                | 1.415423  | -0.997312 |
| 16               | 6                | 0              | 1.067735                | 2.374511  | 0.173766  |
| 17               | 1                | 0              | 1.873332                | 2.284297  | 0.901870  |
| 18               | 1                | 0              | 1.002195                | 3.415992  | -0.184712 |
| 19               | 1                | 0              | 1.786827                | 1.845078  | -1.838274 |
| 20               | 6                | 0              | 1.846169                | 0.071596  | -0.592263 |
| 21               | 1                | 0              | 1.479639                | -0.185486 | 0.410639  |
| 22               | 6                | 0              | 3.373742                | 0.098230  | -0.536461 |
| 23               | 1                | 0              | 3.751441                | 0.580989  | -1.447958 |

|    |   |   |           |           |           |
|----|---|---|-----------|-----------|-----------|
| 24 | 6 | 0 | 3.935982  | -1.339001 | -0.526718 |
| 25 | 1 | 0 | 4.010955  | -1.670182 | -1.567352 |
| 26 | 6 | 0 | 5.306130  | -1.420717 | 0.134360  |
| 27 | 1 | 0 | 5.768139  | -2.385449 | -0.096481 |
| 28 | 1 | 0 | 5.958010  | -0.618596 | -0.214393 |
| 29 | 8 | 0 | 1.461692  | -0.927769 | -1.527663 |
| 30 | 1 | 0 | 0.557142  | -0.713618 | -1.791795 |
| 31 | 8 | 0 | 3.779126  | 0.897539  | 0.559624  |
| 32 | 1 | 0 | 4.172241  | 0.326015  | 1.234090  |
| 33 | 8 | 0 | 3.124176  | -2.241848 | 0.211550  |
| 34 | 1 | 0 | 2.292729  | -2.318389 | -0.271847 |
| 35 | 8 | 0 | 5.167224  | -1.264442 | 1.541380  |
| 36 | 1 | 0 | 4.498752  | -1.908215 | 1.805807  |
| 37 | 6 | 0 | -0.813203 | 2.789541  | 1.682700  |
| 38 | 1 | 0 | -1.761426 | 2.364409  | 2.017413  |
| 39 | 1 | 0 | -0.155741 | 2.886509  | 2.547489  |
| 40 | 1 | 0 | -1.002296 | 3.795488  | 1.270242  |
| 41 | 8 | 0 | -5.153942 | -2.042968 | 0.459311  |
| 42 | 6 | 0 | -6.506698 | -1.719037 | 0.216840  |
| 43 | 1 | 0 | -6.672139 | -1.473846 | -0.837228 |
| 44 | 1 | 0 | -7.080159 | -2.605708 | 0.476406  |
| 45 | 1 | 0 | -6.831261 | -0.880192 | 0.840992  |

### Structure 45b (<sup>2</sup>E ec-ec H-bond N) (M06-2X, Gas Phase)

Energy (Hartrees): = - 1091.3674438  
No imaginary frequencies

Standard orientation:

| Center<br>Number | Atomic<br>Number | Atomic<br>Type | Coordinates (Angstroms) |           |           |
|------------------|------------------|----------------|-------------------------|-----------|-----------|
|                  |                  |                | X                       | Y         | Z         |
| 1                | 6                | 0              | -1.966364               | 0.596317  | -0.420409 |
| 2                | 6                | 0              | -1.636754               | -0.616457 | 0.194995  |
| 3                | 6                | 0              | -2.609760               | -1.565912 | 0.430347  |
| 4                | 6                | 0              | -3.937718               | -1.325772 | 0.054913  |
| 5                | 6                | 0              | -4.276335               | -0.124915 | -0.562211 |
| 6                | 6                | 0              | -3.279802               | 0.823339  | -0.797163 |
| 7                | 1                | 0              | -0.607254               | -0.804906 | 0.479178  |
| 8                | 1                | 0              | -2.378146               | -2.512919 | 0.901657  |
| 9                | 1                | 0              | -5.291788               | 0.082596  | -0.870082 |
| 10               | 1                | 0              | -3.542844               | 1.754175  | -1.289931 |
| 11               | 6                | 0              | -0.912146               | 1.642375  | -0.647454 |
| 12               | 1                | 0              | -1.301774               | 2.414636  | -1.338407 |
| 13               | 7                | 0              | -0.457641               | 2.283009  | 0.592555  |
| 14               | 8                | 0              | 0.265715                | 1.083724  | -1.190023 |
| 15               | 6                | 0              | 1.407871                | 1.745361  | -0.631682 |
| 16               | 6                | 0              | 0.801094                | 2.897331  | 0.171962  |
| 17               | 1                | 0              | 1.407551                | 3.184738  | 1.033621  |
| 18               | 1                | 0              | 0.626560                | 3.782329  | -0.460369 |
| 19               | 1                | 0              | 2.062775                | 2.073723  | -1.440204 |
| 20               | 6                | 0              | 2.184261                | 0.771126  | 0.245910  |
| 21               | 1                | 0              | 3.070030                | 1.297570  | 0.627120  |
| 22               | 6                | 0              | 2.696074                | -0.413484 | -0.576438 |
| 23               | 1                | 0              | 1.870643                | -0.791337 | -1.191265 |
| 24               | 6                | 0              | 3.149667                | -1.558404 | 0.348266  |
| 25               | 1                | 0              | 2.267066                | -2.160196 | 0.588383  |
| 26               | 6                | 0              | 4.205400                | -2.444213 | -0.302081 |
| 27               | 1                | 0              | 4.308233                | -3.373193 | 0.267458  |
| 28               | 1                | 0              | 3.933681                | -2.682719 | -1.331184 |
| 29               | 8                | 0              | 1.409082                | 0.289950  | 1.338144  |
| 30               | 1                | 0              | 0.618098                | 0.849219  | 1.431662  |
| 31               | 8                | 0              | 3.694136                | 0.073258  | -1.455632 |
| 32               | 1                | 0              | 4.552175                | -0.267401 | -1.169547 |
| 33               | 8                | 0              | 3.757468                | -1.091076 | 1.546878  |
| 34               | 1                | 0              | 3.066028                | -0.648931 | 2.054145  |
| 35               | 8                | 0              | 5.447810                | -1.753427 | -0.347052 |
| 36               | 1                | 0              | 5.604387                | -1.451336 | 0.555734  |
| 37               | 6                | 0              | -1.424078               | 3.207226  | 1.157773  |
| 38               | 1                | 0              | -2.337655               | 2.667023  | 1.410443  |
| 39               | 1                | 0              | -1.017101               | 3.645646  | 2.069717  |
| 40               | 1                | 0              | -1.672343               | 4.019352  | 0.455843  |
| 41               | 8                | 0              | -4.815060               | -2.322109 | 0.329808  |
| 42               | 6                | 0              | -6.162087               | -2.133100 | -0.048600 |
| 43               | 1                | 0              | -6.689105               | -3.035302 | 0.252656  |
| 44               | 1                | 0              | -6.600066               | -1.268904 | 0.461333  |
| 45               | 1                | 0              | -6.254805               | -2.002397 | -1.131612 |

### Structure 45b (<sup>2</sup>E ax-ec) (M06-2X, Gas Phase)

Energy (Hartrees): = - 1091.3604517  
No imaginary frequencies

Standard orientation:

| Center<br>Number | Atomic<br>Number | Atomic<br>Type | Coordinates (Angstroms) |           |           |
|------------------|------------------|----------------|-------------------------|-----------|-----------|
|                  |                  |                | X                       | Y         | Z         |
| 1                | 6                | 0              | -2.399713               | 0.423807  | -0.496827 |
| 2                | 6                | 0              | -2.533578               | -0.961683 | -0.425737 |
| 3                | 6                | 0              | -3.748906               | -1.534161 | -0.091138 |
| 4                | 6                | 0              | -4.855309               | -0.728245 | 0.183573  |
| 5                | 6                | 0              | -4.731518               | 0.660028  | 0.118349  |
| 6                | 6                | 0              | -3.505261               | 1.220193  | -0.225217 |
| 7                | 1                | 0              | -1.677608               | -1.588981 | -0.638668 |
| 8                | 1                | 0              | -3.873720               | -2.608408 | -0.035949 |
| 9                | 1                | 0              | -5.570934               | 1.308524  | 0.328502  |
| 10               | 1                | 0              | -3.403602               | 2.299805  | -0.268078 |
| 11               | 6                | 0              | -1.095689               | 1.088816  | -0.836451 |
| 12               | 1                | 0              | -1.239688               | 1.776910  | -1.681853 |
| 13               | 7                | 0              | -0.502911               | 1.856773  | 0.242639  |
| 14               | 8                | 0              | -0.106645               | 0.126783  | -1.224401 |
| 15               | 6                | 0              | 1.162106                | 0.771645  | -1.091811 |
| 16               | 6                | 0              | 0.862015                | 2.048650  | -0.257686 |
| 17               | 1                | 0              | 1.573949                | 2.190109  | 0.552287  |
| 18               | 1                | 0              | 0.886574                | 2.926992  | -0.906329 |
| 19               | 1                | 0              | 1.534180                | 1.022424  | -2.093165 |
| 20               | 6                | 0              | 2.113297                | -0.234176 | -0.462418 |
| 21               | 1                | 0              | 1.824180                | -0.409038 | 0.581708  |
| 22               | 6                | 0              | 3.567121                | 0.246177  | -0.453560 |
| 23               | 1                | 0              | 3.792547                | 0.719447  | -1.420579 |
| 24               | 6                | 0              | 4.526203                | -0.948306 | -0.312710 |
| 25               | 1                | 0              | 4.616974                | -1.411760 | -1.300174 |
| 26               | 6                | 0              | 5.906663                | -0.531842 | 0.178920  |
| 27               | 1                | 0              | 6.613611                | -1.352970 | 0.027146  |
| 28               | 1                | 0              | 6.263429                | 0.348441  | -0.358516 |
| 29               | 8                | 0              | 2.055877                | -1.452676 | -1.198291 |
| 30               | 1                | 0              | 1.128589                | -1.593553 | -1.420816 |
| 31               | 8                | 0              | 3.698404                | 1.226415  | 0.559141  |
| 32               | 1                | 0              | 4.382840                | 0.944959  | 1.182282  |
| 33               | 8                | 0              | 4.069832                | -1.901468 | 0.636010  |
| 34               | 1                | 0              | 3.283036                | -2.308853 | 0.255346  |
| 35               | 8                | 0              | 5.844085                | -0.182740 | 1.556285  |
| 36               | 1                | 0              | 5.428016                | -0.935241 | 1.994526  |
| 37               | 6                | 0              | -0.535797               | 1.161212  | 1.532678  |
| 38               | 1                | 0              | 0.069181                | 1.726432  | 2.241635  |
| 39               | 1                | 0              | -1.560231               | 1.129522  | 1.903671  |
| 40               | 1                | 0              | -0.155737               | 0.132056  | 1.485214  |
| 41               | 8                | 0              | -6.000911               | -1.382220 | 0.502218  |
| 42               | 6                | 0              | -7.149650               | -0.603662 | 0.761708  |
| 43               | 1                | 0              | -7.424517               | 0.000393  | -0.109003 |
| 44               | 1                | 0              | -7.948398               | -1.309170 | 0.978331  |
| 45               | 1                | 0              | -6.999341               | 0.051079  | 1.626275  |

### Structure 45b (<sup>2</sup>E ec-ec H-bond O) (M06-2X, Benzene)

Energy (Hartrees): = - 1091.384339

No imaginary frequencies

Standard orientation:

| Center<br>Number | Atomic<br>Number | Atomic<br>Type | Coordinates (Angstroms) |           |           |
|------------------|------------------|----------------|-------------------------|-----------|-----------|
|                  |                  |                | X                       | Y         | Z         |
| 1                | 6                | 0              | -2.155704               | 0.729809  | -0.234106 |
| 2                | 6                | 0              | -1.876392               | -0.560112 | 0.230917  |
| 3                | 6                | 0              | -2.894511               | -1.465540 | 0.447418  |
| 4                | 6                | 0              | -4.225893               | -1.097084 | 0.208072  |
| 5                | 6                | 0              | -4.517350               | 0.184719  | -0.250593 |
| 6                | 6                | 0              | -3.473181               | 1.085734  | -0.468930 |
| 7                | 1                | 0              | -0.846335               | -0.840885 | 0.425695  |
| 8                | 1                | 0              | -2.697172               | -2.468496 | 0.806282  |
| 9                | 1                | 0              | -5.535618               | 0.493639  | -0.443993 |
| 10               | 1                | 0              | -3.702490               | 2.082555  | -0.832513 |
| 11               | 6                | 0              | -1.025869               | 1.693493  | -0.474517 |
| 12               | 1                | 0              | -1.424890               | 2.646185  | -0.870768 |
| 13               | 7                | 0              | -0.209890               | 1.920528  | 0.707877  |
| 14               | 8                | 0              | -0.112287               | 1.162051  | -1.431537 |
| 15               | 6                | 0              | 1.233858                | 1.414061  | -0.996743 |
| 16               | 6                | 0              | 1.061367                | 2.382531  | 0.165438  |
| 17               | 1                | 0              | 1.863699                | 2.300855  | 0.898052  |
| 18               | 1                | 0              | 0.996148                | 3.420231  | -0.202405 |
| 19               | 1                | 0              | 1.783378                | 1.839671  | -1.840413 |
| 20               | 6                | 0              | 1.846500                | 0.072620  | -0.585630 |
| 21               | 1                | 0              | 1.479785                | -0.184430 | 0.417139  |
| 22               | 6                | 0              | 3.375024                | 0.097582  | -0.531460 |
| 23               | 1                | 0              | 3.754005                | 0.581874  | -1.441208 |
| 24               | 6                | 0              | 3.937266                | -1.339576 | -0.522756 |
| 25               | 1                | 0              | 4.007101                | -1.673371 | -1.562778 |
| 26               | 6                | 0              | 5.312767                | -1.425219 | 0.124159  |

|    |   |   |           |           |           |
|----|---|---|-----------|-----------|-----------|
| 27 | 1 | 0 | 5.765001  | -2.395088 | -0.104806 |
| 28 | 1 | 0 | 5.969843  | -0.634178 | -0.240166 |
| 29 | 8 | 0 | 1.462139  | -0.929992 | -1.519596 |
| 30 | 1 | 0 | 0.550986  | -0.725780 | -1.769415 |
| 31 | 8 | 0 | 3.782787  | 0.892667  | 0.569445  |
| 32 | 1 | 0 | 4.179941  | 0.314635  | 1.235888  |
| 33 | 8 | 0 | 3.128850  | -2.240339 | 0.224549  |
| 34 | 1 | 0 | 2.291720  | -2.311747 | -0.250051 |
| 35 | 8 | 0 | 5.195190  | -1.259275 | 1.534537  |
| 36 | 1 | 0 | 4.534473  | -1.904845 | 1.815031  |
| 37 | 6 | 0 | -0.818783 | 2.825182  | 1.661863  |
| 38 | 1 | 0 | -1.765543 | 2.409686  | 2.013156  |
| 39 | 1 | 0 | -0.158535 | 2.943226  | 2.522403  |
| 40 | 1 | 0 | -1.010139 | 3.821598  | 1.228479  |
| 41 | 8 | 0 | -5.152575 | -2.053202 | 0.453526  |
| 42 | 6 | 0 | -6.511265 | -1.724102 | 0.233980  |
| 43 | 1 | 0 | -6.695941 | -1.477130 | -0.816433 |
| 44 | 1 | 0 | -7.083104 | -2.611384 | 0.498370  |
| 45 | 1 | 0 | -6.826930 | -0.890374 | 0.869254  |

### Structure 45b (<sup>2</sup>E ec-ec H-bond N) (M06-2X, Benzene)

Energy (Hartrees): = - 1091.3876483  
No imaginary frequencies

Standard orientation:

| Center Number | Atomic Number | Atomic Type | Coordinates (Angstroms) |           |           |
|---------------|---------------|-------------|-------------------------|-----------|-----------|
|               |               |             | X                       | Y         | Z         |
| 1             | 6             | 0           | -1.971073               | 0.600172  | -0.408206 |
| 2             | 6             | 0           | -1.660440               | -0.581828 | 0.273955  |
| 3             | 6             | 0           | -2.634411               | -1.530952 | 0.508931  |
| 4             | 6             | 0           | -3.947596               | -1.320814 | 0.067240  |
| 5             | 6             | 0           | -4.268166               | -0.150281 | -0.615682 |
| 6             | 6             | 0           | -3.270463               | 0.797749  | -0.848157 |
| 7             | 1             | 0           | -0.643606               | -0.751279 | 0.610761  |
| 8             | 1             | 0           | -2.411160               | -2.452424 | 1.032925  |
| 9             | 1             | 0           | -5.272076               | 0.034087  | -0.973358 |
| 10            | 1             | 0           | -3.521508               | 1.704903  | -1.389167 |
| 11            | 6             | 0           | -0.914486               | 1.643475  | -0.641295 |
| 12            | 1             | 0           | -1.304392               | 2.412776  | -1.333636 |
| 13            | 7             | 0           | -0.446533               | 2.285662  | 0.591143  |
| 14            | 8             | 0           | 0.260363                | 1.075600  | -1.189952 |
| 15            | 6             | 0           | 1.407494                | 1.745661  | -0.648735 |
| 16            | 6             | 0           | 0.806586                | 2.901748  | 0.152579  |
| 17            | 1             | 0           | 1.420857                | 3.198011  | 1.005365  |
| 18            | 1             | 0           | 0.622413                | 3.780427  | -0.484617 |
| 19            | 1             | 0           | 2.050913                | 2.073797  | -1.466517 |
| 20            | 6             | 0           | 2.196874                | 0.782031  | 0.229724  |
| 21            | 1             | 0           | 3.089118                | 1.314155  | 0.586489  |
| 22            | 6             | 0           | 2.693017                | -0.421535 | -0.575771 |
| 23            | 1             | 0           | 1.861644                | -0.808389 | -1.176416 |
| 24            | 6             | 0           | 3.150365                | -1.553420 | 0.362730  |
| 25            | 1             | 0           | 2.266289                | -2.141800 | 0.628071  |
| 26            | 6             | 0           | 4.180826                | -2.468654 | -0.284938 |
| 27            | 1             | 0           | 4.286745                | -3.381864 | 0.309466  |
| 28            | 1             | 0           | 3.881816                | -2.739102 | -1.298712 |
| 29            | 8             | 0           | 1.438168                | 0.326913  | 1.345542  |
| 30            | 1             | 0           | 0.644649                | 0.886483  | 1.428671  |
| 31            | 8             | 0           | 3.689755                | 0.042620  | -1.473153 |
| 32            | 1             | 0           | 4.542094                | -0.318318 | -1.195133 |
| 33            | 8             | 0           | 3.784113                | -1.068193 | 1.542124  |
| 34            | 1             | 0           | 3.106522                | -0.602008 | 2.047003  |
| 35            | 8             | 0           | 5.434169                | -1.797406 | -0.381227 |
| 36            | 1             | 0           | 5.623955                | -1.478697 | 0.509747  |
| 37            | 6             | 0           | -1.404271               | 3.212546  | 1.167869  |
| 38            | 1             | 0           | -2.314416               | 2.676249  | 1.441500  |
| 39            | 1             | 0           | -0.981914               | 3.654822  | 2.071321  |
| 40            | 1             | 0           | -1.664731               | 4.022253  | 0.468233  |
| 41            | 8             | 0           | -4.827848               | -2.310107 | 0.348187  |
| 42            | 6             | 0           | -6.168509               | -2.138570 | -0.070577 |
| 43            | 1             | 0           | -6.700970               | -3.031119 | 0.252055  |
| 44            | 1             | 0           | -6.622426               | -1.259164 | 0.397416  |
| 45            | 1             | 0           | -6.238320               | -2.052812 | -1.159616 |

### Structure 45b (<sup>2</sup>E ax-ec) (M06-2X, Benzene)

Energy (Hartrees): = - 1091.3797188  
No imaginary frequencies

Standard orientation:

| Center Number | Atomic Number | Atomic Type | Coordinates (Angstroms) |   |   |
|---------------|---------------|-------------|-------------------------|---|---|
|               |               |             | X                       | Y | Z |

|    |   |   |           |           |           |
|----|---|---|-----------|-----------|-----------|
| 1  | 6 | 0 | -2.406124 | 0.413943  | -0.502756 |
| 2  | 6 | 0 | -2.546353 | -0.970705 | -0.422630 |
| 3  | 6 | 0 | -3.765980 | -1.536357 | -0.089251 |
| 4  | 6 | 0 | -4.870477 | -0.724657 | 0.178604  |
| 5  | 6 | 0 | -4.739952 | 0.663325  | 0.104657  |
| 6  | 6 | 0 | -3.510515 | 1.216229  | -0.239145 |
| 7  | 1 | 0 | -1.693788 | -1.605859 | -0.627216 |
| 8  | 1 | 0 | -3.891857 | -2.610636 | -0.028349 |
| 9  | 1 | 0 | -5.577304 | 1.316738  | 0.308999  |
| 10 | 1 | 0 | -3.407603 | 2.295647  | -0.290189 |
| 11 | 6 | 0 | -1.097639 | 1.072623  | -0.841020 |
| 12 | 1 | 0 | -1.234903 | 1.751650  | -1.694524 |
| 13 | 7 | 0 | -0.508431 | 1.853430  | 0.232419  |
| 14 | 8 | 0 | -0.107806 | 0.104856  | -1.210317 |
| 15 | 6 | 0 | 1.160953  | 0.753981  | -1.087376 |
| 16 | 6 | 0 | 0.858482  | 2.039514  | -0.267768 |
| 17 | 1 | 0 | 1.565305  | 2.188896  | 0.545110  |
| 18 | 1 | 0 | 0.886333  | 2.910814  | -0.925552 |
| 19 | 1 | 0 | 1.530117  | 0.995906  | -2.091579 |
| 20 | 6 | 0 | 2.116889  | -0.241657 | -0.447360 |
| 21 | 1 | 0 | 1.834121  | -0.399715 | 0.601158  |
| 22 | 6 | 0 | 3.571826  | 0.237558  | -0.460838 |
| 23 | 1 | 0 | 3.788441  | 0.694193  | -1.437284 |
| 24 | 6 | 0 | 4.533960  | -0.952642 | -0.305681 |
| 25 | 1 | 0 | 4.618314  | -1.435798 | -1.284001 |
| 26 | 6 | 0 | 5.920134  | -0.527737 | 0.159511  |
| 27 | 1 | 0 | 6.623487  | -1.354053 | 0.019198  |
| 28 | 1 | 0 | 6.275112  | 0.336293  | -0.404926 |
| 29 | 8 | 0 | 2.054374  | -1.473124 | -1.162426 |
| 30 | 1 | 0 | 1.122291  | -1.631541 | -1.352499 |
| 31 | 8 | 0 | 3.715741  | 1.235723  | 0.535863  |
| 32 | 1 | 0 | 4.405106  | 0.957584  | 1.155044  |
| 33 | 8 | 0 | 4.087365  | -1.887023 | 0.668276  |
| 34 | 1 | 0 | 3.293828  | -2.298054 | 0.305517  |
| 35 | 8 | 0 | 5.878982  | -0.144549 | 1.531268  |
| 36 | 1 | 0 | 5.478405  | -0.889433 | 1.996879  |
| 37 | 6 | 0 | -0.541801 | 1.174110  | 1.530819  |
| 38 | 1 | 0 | 0.061704  | 1.749097  | 2.233941  |
| 39 | 1 | 0 | -1.565583 | 1.146974  | 1.905279  |
| 40 | 1 | 0 | -0.159637 | 0.145187  | 1.499389  |
| 41 | 8 | 0 | -6.018427 | -1.369454 | 0.499449  |
| 42 | 6 | 0 | -7.161227 | -0.581057 | 0.773271  |
| 43 | 1 | 0 | -7.450179 | 0.018145  | -0.096196 |
| 44 | 1 | 0 | -7.961511 | -1.280897 | 1.005599  |
| 45 | 1 | 0 | -6.996072 | 0.074592  | 1.634133  |

-----  
**Structure 45b (<sup>2</sup>E ec-ec H-bond O) (M06-2X, DMSO)**

Energy (Hartrees): = - 1091.3881133  
 No imaginary frequencies

Standard orientation:

| Center<br>Number | Atomic<br>Number | Atomic<br>Type | Coordinates (Angstroms) |           |           |
|------------------|------------------|----------------|-------------------------|-----------|-----------|
|                  |                  |                | X                       | Y         | Z         |
| 1                | 6                | 0              | -2.173409               | 0.690034  | -0.283949 |
| 2                | 6                | 0              | -1.895123               | -0.622145 | 0.115412  |
| 3                | 6                | 0              | -2.919029               | -1.518010 | 0.352829  |
| 4                | 6                | 0              | -4.255014               | -1.117418 | 0.201138  |
| 5                | 6                | 0              | -4.544999               | 0.186671  | -0.195131 |
| 6                | 6                | 0              | -3.495815               | 1.076793  | -0.435987 |
| 7                | 1                | 0              | -0.863559               | -0.936358 | 0.240007  |
| 8                | 1                | 0              | -2.716623               | -2.537633 | 0.659734  |
| 9                | 1                | 0              | -5.565986               | 0.521192  | -0.320374 |
| 10               | 1                | 0              | -3.724056               | 2.092006  | -0.745919 |
| 11               | 6                | 0              | -1.045475               | 1.658026  | -0.516188 |
| 12               | 1                | 0              | -1.443980               | 2.604919  | -0.922181 |
| 13               | 7                | 0              | -0.256314               | 1.900342  | 0.685171  |
| 14               | 8                | 0              | -0.109157               | 1.125520  | -1.450466 |
| 15               | 6                | 0              | 1.227310                | 1.406347  | -0.996869 |
| 16               | 6                | 0              | 1.019314                | 2.375315  | 0.157994  |
| 17               | 1                | 0              | 1.808018                | 2.310782  | 0.906949  |
| 18               | 1                | 0              | 0.942523                | 3.408535  | -0.216751 |
| 19               | 1                | 0              | 1.783017                | 1.842307  | -1.831043 |
| 20               | 6                | 0              | 1.859668                | 0.076825  | -0.586913 |
| 21               | 1                | 0              | 1.439106                | -0.233160 | 0.378679  |
| 22               | 6                | 0              | 3.380205                | 0.149309  | -0.425449 |
| 23               | 1                | 0              | 3.804899                | 0.730815  | -1.254738 |
| 24               | 6                | 0              | 3.995417                | -1.257766 | -0.510726 |
| 25               | 1                | 0              | 4.063505                | -1.520564 | -1.570473 |
| 26               | 6                | 0              | 5.387172                | -1.331021 | 0.099291  |
| 27               | 1                | 0              | 5.867356                | -2.268018 | -0.197446 |
| 28               | 1                | 0              | 6.004898                | -0.497620 | -0.238736 |
| 29               | 8                | 0              | 1.567288                | -0.901736 | -1.580556 |
| 30               | 1                | 0              | 0.647969                | -0.749161 | -1.836299 |

|    |   |   |           |           |           |
|----|---|---|-----------|-----------|-----------|
| 31 | 8 | 0 | 3.667609  | 0.833203  | 0.787171  |
| 32 | 1 | 0 | 4.187302  | 0.241901  | 1.349548  |
| 33 | 8 | 0 | 3.227746  | -2.229790 | 0.191646  |
| 34 | 1 | 0 | 2.394005  | -2.311096 | -0.287268 |
| 35 | 8 | 0 | 5.308504  | -1.249036 | 1.523292  |
| 36 | 1 | 0 | 4.696911  | -1.947082 | 1.790702  |
| 37 | 6 | 0 | -0.893568 | 2.829944  | 1.600668  |
| 38 | 1 | 0 | -1.845216 | 2.419548  | 1.945784  |
| 39 | 1 | 0 | -0.250864 | 2.980126  | 2.469724  |
| 40 | 1 | 0 | -1.082866 | 3.808802  | 1.130987  |
| 41 | 8 | 0 | -5.187062 | -2.063082 | 0.460218  |
| 42 | 6 | 0 | -6.551740 | -1.691837 | 0.325681  |
| 43 | 1 | 0 | -6.782162 | -1.399995 | -0.703152 |
| 44 | 1 | 0 | -7.131109 | -2.574706 | 0.588053  |
| 45 | 1 | 0 | -6.807795 | -0.874978 | 1.006767  |

### Structure 45b (<sup>2</sup>E ec-ec H-bond N) (M06-2X, DMSO)

Energy (Hartrees): = - 1091.3918612  
No imaginary frequencies

Standard orientation:

| Center<br>Number | Atomic<br>Number | Atomic<br>Type | Coordinates (Angstroms) |           |           |
|------------------|------------------|----------------|-------------------------|-----------|-----------|
|                  |                  |                | X                       | Y         | Z         |
| 1                | 6                | 0              | -1.963994               | 0.599313  | -0.421079 |
| 2                | 6                | 0              | -1.622336               | -0.618103 | 0.178818  |
| 3                | 6                | 0              | -2.587138               | -1.578893 | 0.414431  |
| 4                | 6                | 0              | -3.922491               | -1.342704 | 0.056902  |
| 5                | 6                | 0              | -4.274505               | -0.133281 | -0.540423 |
| 6                | 6                | 0              | -3.286084               | 0.823930  | -0.776421 |
| 7                | 1                | 0              | -0.590036               | -0.805505 | 0.455673  |
| 8                | 1                | 0              | -2.335547               | -2.527499 | 0.874491  |
| 9                | 1                | 0              | -5.296525               | 0.074394  | -0.828541 |
| 10               | 1                | 0              | -3.561350               | 1.762350  | -1.248232 |
| 11               | 6                | 0              | -0.918211               | 1.654809  | -0.652063 |
| 12               | 1                | 0              | -1.314888               | 2.425333  | -1.336453 |
| 13               | 7                | 0              | -0.453618               | 2.289589  | 0.585278  |
| 14               | 8                | 0              | 0.260085                | 1.094286  | -1.208610 |
| 15               | 6                | 0              | 1.405436                | 1.758677  | -0.651586 |
| 16               | 6                | 0              | 0.800421                | 2.910614  | 0.149391  |
| 17               | 1                | 0              | 1.411186                | 3.208285  | 1.003731  |
| 18               | 1                | 0              | 0.611975                | 3.786588  | -0.488320 |
| 19               | 1                | 0              | 2.053623                | 2.095802  | -1.461525 |
| 20               | 6                | 0              | 2.187258                | 0.791653  | 0.229501  |
| 21               | 1                | 0              | 3.078698                | 1.325180  | 0.585458  |
| 22               | 6                | 0              | 2.676448                | -0.424582 | -0.559385 |
| 23               | 1                | 0              | 1.840249                | -0.826627 | -1.142751 |
| 24               | 6                | 0              | 3.143496                | -1.539389 | 0.394683  |
| 25               | 1                | 0              | 2.261692                | -2.119460 | 0.682886  |
| 26               | 6                | 0              | 4.154722                | -2.477591 | -0.246730 |
| 27               | 1                | 0              | 4.271170                | -3.370761 | 0.374473  |
| 28               | 1                | 0              | 3.827663                | -2.782191 | -1.241759 |
| 29               | 8                | 0              | 1.423022                | 0.345860  | 1.346585  |
| 30               | 1                | 0              | 0.627309                | 0.907081  | 1.412569  |
| 31               | 8                | 0              | 3.668290                | 0.019001  | -1.477071 |
| 32               | 1                | 0              | 4.516181                | -0.354688 | -1.201915 |
| 33               | 8                | 0              | 3.796405                | -1.031518 | 1.555439  |
| 34               | 1                | 0              | 3.127919                | -0.546169 | 2.054717  |
| 35               | 8                | 0              | 5.412440                | -1.817637 | -0.397158 |
| 36               | 1                | 0              | 5.635232                | -1.483079 | 0.480944  |
| 37               | 6                | 0              | -1.413223               | 3.226178  | 1.149307  |
| 38               | 1                | 0              | -2.325115               | 2.696186  | 1.430821  |
| 39               | 1                | 0              | -0.988694               | 3.680954  | 2.045394  |
| 40               | 1                | 0              | -1.669874               | 4.022926  | 0.435261  |
| 41               | 8                | 0              | -4.791287               | -2.344032 | 0.325871  |
| 42               | 6                | 0              | -6.152740               | -2.146788 | -0.027580 |
| 43               | 1                | 0              | -6.674565               | -3.054290 | 0.269411  |
| 44               | 1                | 0              | -6.580199               | -1.292513 | 0.505511  |
| 45               | 1                | 0              | -6.264764               | -2.000156 | -1.105824 |

### Structure 45b (<sup>2</sup>E ax-ec) (M06-2X, DMSO)

Energy (Hartrees): = - 1091.3835187  
No imaginary frequencies

Standard orientation:

| Center<br>Number | Atomic<br>Number | Atomic<br>Type | Coordinates (Angstroms) |           |           |
|------------------|------------------|----------------|-------------------------|-----------|-----------|
|                  |                  |                | X                       | Y         | Z         |
| 1                | 6                | 0              | -2.408822               | 0.459134  | -0.440338 |
| 2                | 6                | 0              | -2.484330               | -0.914597 | -0.203785 |
| 3                | 6                | 0              | -3.697567               | -1.510498 | 0.098804  |

|    |   |   |           |           |           |
|----|---|---|-----------|-----------|-----------|
| 4  | 6 | 0 | -4.863691 | -0.741087 | 0.176111  |
| 5  | 6 | 0 | -4.798610 | 0.634103  | -0.057476 |
| 6  | 6 | 0 | -3.571805 | 1.216670  | -0.366363 |
| 7  | 1 | 0 | -1.586304 | -1.518555 | -0.259767 |
| 8  | 1 | 0 | -3.767862 | -2.576720 | 0.279835  |
| 9  | 1 | 0 | -5.683916 | 1.254151  | -0.010896 |
| 10 | 1 | 0 | -3.526488 | 2.285431  | -0.551878 |
| 11 | 6 | 0 | -1.105565 | 1.150199  | -0.729301 |
| 12 | 1 | 0 | -1.251061 | 1.895580  | -1.522526 |
| 13 | 7 | 0 | -0.510393 | 1.845124  | 0.404030  |
| 14 | 8 | 0 | -0.119543 | 0.213555  | -1.174385 |
| 15 | 6 | 0 | 1.154108  | 0.843280  | -1.002298 |
| 16 | 6 | 0 | 0.860003  | 2.059308  | -0.082836 |
| 17 | 1 | 0 | 1.564134  | 2.137853  | 0.742814  |
| 18 | 1 | 0 | 0.894755  | 2.978971  | -0.670563 |
| 19 | 1 | 0 | 1.521369  | 1.166642  | -1.983183 |
| 20 | 6 | 0 | 2.106640  | -0.204814 | -0.444065 |
| 21 | 1 | 0 | 1.844226  | -0.422672 | 0.598988  |
| 22 | 6 | 0 | 3.567212  | 0.254499  | -0.465839 |
| 23 | 1 | 0 | 3.770089  | 0.759733  | -1.420140 |
| 24 | 6 | 0 | 4.515755  | -0.952642 | -0.396762 |
| 25 | 1 | 0 | 4.555878  | -1.393778 | -1.396951 |
| 26 | 6 | 0 | 5.927286  | -0.568457 | 0.020508  |
| 27 | 1 | 0 | 6.606238  | -1.403701 | -0.173988 |
| 28 | 1 | 0 | 6.273398  | 0.302953  | -0.537686 |
| 29 | 8 | 0 | 2.009517  | -1.391144 | -1.228714 |
| 30 | 1 | 0 | 1.067689  | -1.543773 | -1.374227 |
| 31 | 8 | 0 | 3.747637  | 1.193276  | 0.585670  |
| 32 | 1 | 0 | 4.475483  | 0.884371  | 1.143089  |
| 33 | 8 | 0 | 4.091392  | -1.921632 | 0.555841  |
| 34 | 1 | 0 | 3.276214  | -2.302581 | 0.207411  |
| 35 | 8 | 0 | 5.958295  | -0.222535 | 1.406031  |
| 36 | 1 | 0 | 5.580633  | -0.979644 | 1.872109  |
| 37 | 6 | 0 | -0.541479 | 1.062962  | 1.644744  |
| 38 | 1 | 0 | 0.060393  | 1.581217  | 2.392300  |
| 39 | 1 | 0 | -1.565308 | 1.004653  | 2.017606  |
| 40 | 1 | 0 | -0.154603 | 0.041429  | 1.534335  |
| 41 | 8 | 0 | -6.000134 | -1.411794 | 0.476812  |
| 42 | 6 | 0 | -7.208143 | -0.666026 | 0.528514  |
| 43 | 1 | 0 | -7.424877 | -0.198821 | -0.436742 |
| 44 | 1 | 0 | -7.993346 | -1.380340 | 0.767365  |
| 45 | 1 | 0 | -7.167258 | 0.101725  | 1.306752  |

-----  
**Structure 45c (<sup>5</sup>C<sub>2</sub> ec-ec) (M06-2X, Gas Phase)**

Energy (Hartrees): = - 1091.3637063  
 No imaginary frequencies

Standard orientation:

| Center Number | Atomic Number | Atomic Type | Coordinates (Angstroms) |           |           |
|---------------|---------------|-------------|-------------------------|-----------|-----------|
|               |               |             | X                       | Y         | Z         |
| 1             | 6             | 0           | -2.005663               | 1.415543  | 0.505570  |
| 2             | 6             | 0           | -1.020231               | 2.485598  | 0.055667  |
| 3             | 6             | 0           | -1.736412               | 0.140244  | -0.298109 |
| 4             | 1             | 0           | -1.166424               | 3.389244  | 0.651392  |
| 5             | 1             | 0           | -1.180041               | 2.736771  | -1.007781 |
| 6             | 1             | 0           | -3.033355               | 1.754657  | 0.358038  |
| 7             | 1             | 0           | -1.933464               | 0.352918  | -1.361381 |
| 8             | 8             | 0           | -0.378219               | -0.228768 | -0.137287 |
| 9             | 7             | 0           | 0.325696                | 1.971433  | 0.299806  |
| 10            | 6             | 0           | -2.573882               | -1.068458 | 0.113993  |
| 11            | 1             | 0           | -2.303633               | -1.899732 | -0.544849 |
| 12            | 6             | 0           | -4.079507               | -0.834441 | -0.004725 |
| 13            | 1             | 0           | -4.380049               | -0.024056 | 0.676431  |
| 14            | 6             | 0           | -4.566620               | -0.516474 | -1.407331 |
| 15            | 1             | 0           | -4.161696               | -1.269031 | -2.099866 |
| 16            | 1             | 0           | -4.220103               | 0.469544  | -1.727334 |
| 17            | 8             | 0           | -2.298084               | -1.512238 | 1.430096  |
| 18            | 1             | 0           | -2.222461               | -0.718657 | 1.977482  |
| 19            | 8             | 0           | -4.745585               | -2.028150 | 0.369127  |
| 20            | 1             | 0           | -4.300116               | -2.346129 | 1.163018  |
| 21            | 8             | 0           | -5.973373               | -0.487661 | -1.447758 |
| 22            | 1             | 0           | -6.264837               | -1.276663 | -0.977880 |
| 23            | 8             | 0           | -1.829908               | 1.178583  | 1.896062  |
| 24            | 1             | 0           | -0.870916               | 1.205491  | 2.030625  |
| 25            | 6             | 0           | 1.332696                | 2.997281  | 0.062492  |
| 26            | 1             | 0           | 1.382041                | 3.296349  | -0.997939 |
| 27            | 1             | 0           | 1.080573                | 3.877739  | 0.655056  |
| 28            | 1             | 0           | 2.314643                | 2.640432  | 0.369379  |
| 29            | 6             | 0           | 1.922376                | 0.202717  | -0.324494 |
| 30            | 6             | 0           | 2.241048                | -0.441687 | 0.874358  |
| 31            | 6             | 0           | 2.892814                | 0.317055  | -1.305563 |
| 32            | 6             | 0           | 3.508444                | -0.946689 | 1.081896  |
| 33            | 1             | 0           | 1.471834                | -0.560391 | 1.628295  |



|    |   |   |          |           |           |
|----|---|---|----------|-----------|-----------|
| 34 | 6 | 0 | 4.179899 | -0.184988 | -1.111063 |
| 35 | 1 | 0 | 2.654010 | 0.807154  | -2.244047 |
| 36 | 6 | 0 | 4.488667 | -0.818478 | 0.089835  |
| 37 | 1 | 0 | 3.774804 | -1.457593 | 1.998605  |
| 38 | 1 | 0 | 4.915787 | -0.081015 | -1.896334 |
| 39 | 6 | 0 | 0.542178 | 0.768346  | -0.515997 |
| 40 | 1 | 0 | 0.384729 | 1.020309  | -1.585687 |
| 41 | 8 | 0 | 5.700376 | -1.346974 | 0.389751  |
| 42 | 6 | 0 | 6.711342 | -1.271074 | -0.593227 |
| 43 | 1 | 0 | 7.586350 | -1.751759 | -0.162336 |
| 44 | 1 | 0 | 6.416949 | -1.800159 | -1.505300 |
| 45 | 1 | 0 | 6.950973 | -0.230765 | -0.835961 |

### Structure 45c ( $^5\text{C}_2$ ax-ec) (M06-2X, Gas Phase)

Energy (Hartrees): = - 1091.3599418  
No imaginary frequencies

Standard orientation:

| Center<br>Number | Atomic<br>Number | Atomic<br>Type | Coordinates (Angstroms) |           |           |
|------------------|------------------|----------------|-------------------------|-----------|-----------|
|                  |                  |                | X                       | Y         | Z         |
| 1                | 6                | 0              | -1.912024               | 1.636130  | -0.083486 |
| 2                | 6                | 0              | -0.788986               | 2.507289  | -0.661677 |
| 3                | 6                | 0              | -1.644410               | 0.178212  | -0.482155 |
| 4                | 1                | 0              | -0.899817               | 3.528905  | -0.295187 |
| 5                | 1                | 0              | -0.881521               | 2.527928  | -1.754633 |
| 6                | 1                | 0              | -2.880755               | 1.954392  | -0.472047 |
| 7                | 1                | 0              | -1.684336               | 0.110863  | -1.581472 |
| 8                | 8                | 0              | -0.336931               | -0.175738 | -0.047473 |
| 9                | 7                | 0              | 0.551824                | 2.019067  | -0.331568 |
| 10               | 6                | 0              | -2.603815               | -0.875852 | 0.077026  |
| 11               | 1                | 0              | -2.167162               | -1.845591 | -0.185101 |
| 12               | 6                | 0              | -3.995242               | -0.783080 | -0.549305 |
| 13               | 1                | 0              | -3.912740               | -0.719089 | -1.644003 |
| 14               | 6                | 0              | -4.827456               | -2.003621 | -0.192736 |
| 15               | 1                | 0              | -4.791053               | -2.142154 | 0.891990  |
| 16               | 1                | 0              | -4.422693               | -2.892447 | -0.690111 |
| 17               | 8                | 0              | -2.701691               | -0.855627 | 1.482366  |
| 18               | 1                | 0              | -3.148947               | -0.027379 | 1.703055  |
| 19               | 8                | 0              | -4.620897               | 0.377314  | -0.035469 |
| 20               | 1                | 0              | -5.567524               | 0.248520  | -0.167077 |
| 21               | 8                | 0              | -6.149209               | -1.721795 | -0.636819 |
| 22               | 1                | 0              | -6.757816               | -2.325789 | -0.208394 |
| 23               | 8                | 0              | -1.975527               | 1.774834  | 1.329308  |
| 24               | 1                | 0              | -1.305925               | 1.185402  | 1.695868  |
| 25               | 6                | 0              | 1.009217                | 2.313680  | 1.028321  |
| 26               | 1                | 0              | 0.717577                | 1.553432  | 1.764719  |
| 27               | 1                | 0              | 2.098300                | 2.381533  | 1.044138  |
| 28               | 1                | 0              | 0.594338                | 3.270445  | 1.343507  |
| 29               | 6                | 0              | 2.018485                | 0.050407  | -0.398097 |
| 30               | 6                | 0              | 2.185727                | -1.111291 | 0.353681  |
| 31               | 6                | 0              | 3.142330                | 0.694040  | -0.901541 |
| 32               | 6                | 0              | 3.453802                | -1.614163 | 0.593633  |
| 33               | 1                | 0              | 1.313665                | -1.613763 | 0.751320  |
| 34               | 6                | 0              | 4.421793                | 0.199235  | -0.669448 |
| 35               | 1                | 0              | 3.013705                | 1.609399  | -1.469977 |
| 36               | 6                | 0              | 4.578529                | -0.965488 | 0.082590  |
| 37               | 1                | 0              | 3.604850                | -2.514292 | 1.176468  |
| 38               | 1                | 0              | 5.275936                | 0.724575  | -1.074234 |
| 39               | 6                | 0              | 0.654188                | 0.624765  | -0.693115 |
| 40               | 1                | 0              | 0.462631                | 0.566512  | -1.776350 |
| 41               | 8                | 0              | 5.776537                | -1.538162 | 0.369567  |
| 42               | 6                | 0              | 6.938595                | -0.905756 | -0.121011 |
| 43               | 1                | 0              | 7.042178                | 0.106074  | 0.284485  |
| 44               | 1                | 0              | 7.776401                | -1.514589 | 0.211082  |
| 45               | 1                | 0              | 6.935283                | -0.859992 | -1.214983 |

### Structure 45c ( $^5\text{C}_2$ ec-ec) (M06-2X, Benzene)

Energy (Hartrees): = - 1091.3850528  
No imaginary frequencies

Standard orientation:

| Center<br>Number | Atomic<br>Number | Atomic<br>Type | Coordinates (Angstroms) |          |           |
|------------------|------------------|----------------|-------------------------|----------|-----------|
|                  |                  |                | X                       | Y        | Z         |
| 1                | 6                | 0              | -2.001794               | 1.430133 | 0.498235  |
| 2                | 6                | 0              | -1.011555               | 2.493919 | 0.046191  |
| 3                | 6                | 0              | -1.740378               | 0.151804 | -0.302534 |
| 4                | 1                | 0              | -1.154317               | 3.400871 | 0.637615  |
| 5                | 1                | 0              | -1.168283               | 2.740689 | -1.017824 |

|    |   |   |           |           |           |
|----|---|---|-----------|-----------|-----------|
| 6  | 1 | 0 | -3.027529 | 1.774497  | 0.351339  |
| 7  | 1 | 0 | -1.940752 | 0.362167  | -1.364897 |
| 8  | 8 | 0 | -0.381825 | -0.223693 | -0.145222 |
| 9  | 7 | 0 | 0.332015  | 1.973180  | 0.295403  |
| 10 | 6 | 0 | -2.578274 | -1.054337 | 0.117823  |
| 11 | 1 | 0 | -2.305960 | -1.891758 | -0.532424 |
| 12 | 6 | 0 | -4.085121 | -0.826478 | -0.004675 |
| 13 | 1 | 0 | -4.389230 | -0.002173 | 0.657321  |
| 14 | 6 | 0 | -4.572411 | -0.544301 | -1.414108 |
| 15 | 1 | 0 | -4.166071 | -1.309216 | -2.091621 |
| 16 | 1 | 0 | -4.231916 | 0.435502  | -1.757703 |
| 17 | 8 | 0 | -2.304346 | -1.483386 | 1.441662  |
| 18 | 1 | 0 | -2.211945 | -0.680304 | 1.973603  |
| 19 | 8 | 0 | -4.748535 | -2.014964 | 0.398012  |
| 20 | 1 | 0 | -4.306638 | -2.306113 | 1.204517  |
| 21 | 8 | 0 | -5.982328 | -0.524835 | -1.456671 |
| 22 | 1 | 0 | -6.268951 | -1.308379 | -0.974177 |
| 23 | 8 | 0 | -1.823011 | 1.194844  | 1.891688  |
| 24 | 1 | 0 | -0.863139 | 1.228320  | 2.023955  |
| 25 | 6 | 0 | 1.342848  | 2.997749  | 0.068867  |
| 26 | 1 | 0 | 1.400648  | 3.304614  | -0.988567 |
| 27 | 1 | 0 | 1.089190  | 3.876072  | 0.664675  |
| 28 | 1 | 0 | 2.323388  | 2.641901  | 0.382808  |
| 29 | 6 | 0 | 1.922016  | 0.195961  | -0.328841 |
| 30 | 6 | 0 | 2.232157  | -0.465508 | 0.863088  |
| 31 | 6 | 0 | 2.901957  | 0.325118  | -1.300053 |
| 32 | 6 | 0 | 3.497859  | -0.976275 | 1.072451  |
| 33 | 1 | 0 | 1.460912  | -0.590250 | 1.614375  |
| 34 | 6 | 0 | 4.187125  | -0.180400 | -1.102875 |
| 35 | 1 | 0 | 2.671917  | 0.830672  | -2.232648 |
| 36 | 6 | 0 | 4.486669  | -0.834244 | 0.090311  |
| 37 | 1 | 0 | 3.753150  | -1.500236 | 1.985491  |
| 38 | 1 | 0 | 4.929618  | -0.064655 | -1.880642 |
| 39 | 6 | 0 | 0.544948  | 0.771321  | -0.522496 |
| 40 | 1 | 0 | 0.390783  | 1.023665  | -1.591433 |
| 41 | 8 | 0 | 5.694963  | -1.367759 | 0.388792  |
| 42 | 6 | 0 | 6.717785  | -1.263750 | -0.583539 |
| 43 | 1 | 0 | 7.591945  | -1.749476 | -0.154644 |
| 44 | 1 | 0 | 6.439527  | -1.776810 | -1.509707 |
| 45 | 1 | 0 | 6.957203  | -0.217783 | -0.800368 |

### Structure 45c (<sup>5</sup>C<sub>2</sub> ax-ec) (M06-2X, Benzene)

Energy (Hartrees): = - 1091.3805371

No imaginary frequencies

Standard orientation:

| Center Number | Atomic Number | Atomic Type | Coordinates (Angstroms) |           |           |
|---------------|---------------|-------------|-------------------------|-----------|-----------|
|               |               |             | X                       | Y         | Z         |
| 1             | 6             | 0           | -1.913894               | 1.633142  | -0.078696 |
| 2             | 6             | 0           | -0.791608               | 2.512758  | -0.644889 |
| 3             | 6             | 0           | -1.645927               | 0.181349  | -0.495541 |
| 4             | 1             | 0           | -0.901740               | 3.530239  | -0.266554 |
| 5             | 1             | 0           | -0.887001               | 2.544840  | -1.737032 |
| 6             | 1             | 0           | -2.881295               | 1.957514  | -0.465733 |
| 7             | 1             | 0           | -1.686446               | 0.127177  | -1.594750 |
| 8             | 8             | 0           | -0.336789               | -0.176668 | -0.064256 |
| 9             | 7             | 0           | 0.551410                | 2.021390  | -0.323005 |
| 10            | 6             | 0           | -2.603286               | -0.880450 | 0.051116  |
| 11            | 1             | 0           | -2.181764               | -1.845888 | -0.247508 |
| 12            | 6             | 0           | -4.006544               | -0.760110 | -0.544573 |
| 13            | 1             | 0           | -3.942386               | -0.636757 | -1.635029 |
| 14            | 6             | 0           | -4.827977               | -2.000969 | -0.240048 |
| 15            | 1             | 0           | -4.777859               | -2.199862 | 0.834997  |
| 16            | 1             | 0           | -4.428563               | -2.861188 | -0.789192 |
| 17            | 8             | 0           | -2.672370               | -0.897249 | 1.459809  |
| 18            | 1             | 0           | -3.124174               | -0.078883 | 1.706769  |
| 19            | 8             | 0           | -4.628435               | 0.370270  | 0.041409  |
| 20            | 1             | 0           | -5.577419               | 0.234648  | -0.068156 |
| 21            | 8             | 0           | -6.159575               | -1.705248 | -0.646488 |
| 22            | 1             | 0           | -6.754813               | -2.335348 | -0.233775 |
| 23            | 8             | 0           | -1.982663               | 1.752865  | 1.337406  |
| 24            | 1             | 0           | -1.300467               | 1.172688  | 1.695896  |
| 25            | 6             | 0           | 1.015155                | 2.306698  | 1.035421  |
| 26            | 1             | 0           | 0.702094                | 1.563465  | 1.780996  |
| 27            | 1             | 0           | 2.106207                | 2.343881  | 1.053333  |
| 28            | 1             | 0           | 0.634189                | 3.280032  | 1.344588  |
| 29            | 6             | 0           | 2.017842                | 0.051771  | -0.409012 |
| 30            | 6             | 0           | 2.189184                | -1.061074 | 0.413017  |
| 31            | 6             | 0           | 3.139815                | 0.652232  | -0.968445 |
| 32            | 6             | 0           | 3.457396                | -1.557979 | 0.666948  |
| 33            | 1             | 0           | 1.321140                | -1.532760 | 0.855535  |
| 34            | 6             | 0           | 4.419373                | 0.162732  | -0.724485 |
| 35            | 1             | 0           | 3.014128                | 1.529523  | -1.595026 |

|    |   |   |          |           |           |
|----|---|---|----------|-----------|-----------|
| 36 | 6 | 0 | 4.580150 | -0.952239 | 0.099794  |
| 37 | 1 | 0 | 3.606896 | -2.419751 | 1.306264  |
| 38 | 1 | 0 | 5.271018 | 0.653670  | -1.175904 |
| 39 | 6 | 0 | 0.653962 | 0.630051  | -0.701692 |
| 40 | 1 | 0 | 0.463544 | 0.586030  | -1.785174 |
| 41 | 8 | 0 | 5.777065 | -1.512134 | 0.405801  |
| 42 | 6 | 0 | 6.937937 | -0.926092 | -0.149503 |
| 43 | 1 | 0 | 7.060835 | 0.109875  | 0.182657  |
| 44 | 1 | 0 | 7.777056 | -1.517746 | 0.211508  |
| 45 | 1 | 0 | 6.919615 | -0.960745 | -1.243607 |

### Structure 45c (<sup>5</sup>C<sub>2</sub> ec-ec) (M06-2X, DMSO)

Energy (Hartrees): = - 1091.3922323  
No imaginary frequencies

Standard orientation:

| Center Number | Atomic Number | Atomic Type | Coordinates (Angstroms) |           |           |
|---------------|---------------|-------------|-------------------------|-----------|-----------|
|               |               |             | X                       | Y         | Z         |
| 1             | 6             | 0           | -1.998907               | 1.422098  | 0.492362  |
| 2             | 6             | 0           | -1.022651               | 2.480412  | 0.004345  |
| 3             | 6             | 0           | -1.741116               | 0.132470  | -0.288301 |
| 4             | 1             | 0           | -1.158138               | 3.401037  | 0.575639  |
| 5             | 1             | 0           | -1.199609               | 2.697137  | -1.061601 |
| 6             | 1             | 0           | -3.027406               | 1.758748  | 0.352527  |
| 7             | 1             | 0           | -1.937688               | 0.328296  | -1.352511 |
| 8             | 8             | 0           | -0.379340               | -0.240538 | -0.118514 |
| 9             | 7             | 0           | 0.332812                | 1.977143  | 0.239849  |
| 10            | 6             | 0           | -2.583066               | -1.063007 | 0.147308  |
| 11            | 1             | 0           | -2.315723               | -1.912043 | -0.489794 |
| 12            | 6             | 0           | -4.087429               | -0.829289 | 0.015376  |
| 13            | 1             | 0           | -4.389903               | 0.003541  | 0.665967  |
| 14            | 6             | 0           | -4.559093               | -0.556417 | -1.399735 |
| 15            | 1             | 0           | -4.146399               | -1.323135 | -2.070457 |
| 16            | 1             | 0           | -4.214592               | 0.422085  | -1.740122 |
| 17            | 8             | 0           | -2.315862               | -1.469593 | 1.483137  |
| 18            | 1             | 0           | -2.199379               | -0.652816 | 1.990165  |
| 19            | 8             | 0           | -4.760257               | -2.012525 | 0.429561  |
| 20            | 1             | 0           | -4.340189               | -2.277378 | 1.256797  |
| 21            | 8             | 0           | -5.973754               | -0.541138 | -1.457387 |
| 22            | 1             | 0           | -6.260942               | -1.323807 | -0.973365 |
| 23            | 8             | 0           | -1.798658               | 1.208142  | 1.891087  |
| 24            | 1             | 0           | -0.836077               | 1.235336  | 2.005417  |
| 25            | 6             | 0           | 1.321226                | 3.001340  | -0.080960 |
| 26            | 1             | 0           | 1.337917                | 3.239920  | -1.156428 |
| 27            | 1             | 0           | 1.071782                | 3.910647  | 0.468154  |
| 28            | 1             | 0           | 2.318428                | 2.680312  | 0.220800  |
| 29            | 6             | 0           | 1.920662                | 0.192993  | -0.329263 |
| 30            | 6             | 0           | 2.288973                | -0.274597 | 0.936613  |
| 31            | 6             | 0           | 2.849072                | 0.149834  | -1.357350 |
| 32            | 6             | 0           | 3.560623                | -0.766297 | 1.161486  |
| 33            | 1             | 0           | 1.565057                | -0.251650 | 1.744161  |
| 34            | 6             | 0           | 4.139283                | -0.341417 | -1.148004 |
| 35            | 1             | 0           | 2.573658                | 0.507946  | -2.344307 |
| 36            | 6             | 0           | 4.498099                | -0.798250 | 0.119245  |
| 37            | 1             | 0           | 3.860176                | -1.131298 | 2.137109  |
| 38            | 1             | 0           | 4.841618                | -0.361432 | -1.970778 |
| 39            | 6             | 0           | 0.538757                | 0.750472  | -0.539734 |
| 40            | 1             | 0           | 0.374721                | 0.962159  | -1.613851 |
| 41            | 8             | 0           | 5.718314                | -1.288634 | 0.438112  |
| 42            | 6             | 0           | 6.698589                | -1.327559 | -0.588993 |
| 43            | 1             | 0           | 7.600453                | -1.727564 | -0.130257 |
| 44            | 1             | 0           | 6.387601                | -1.982635 | -1.408178 |
| 45            | 1             | 0           | 6.903290                | -0.325842 | -0.978359 |

### Structure 45c (<sup>5</sup>C<sub>2</sub> ax-ec) (M06-2X, DMSO)

Energy (Hartrees): = - 1091.3861727  
No imaginary frequencies

Standard orientation:

| Center Number | Atomic Number | Atomic Type | Coordinates (Angstroms) |          |           |
|---------------|---------------|-------------|-------------------------|----------|-----------|
|               |               |             | X                       | Y        | Z         |
| 1             | 6             | 0           | -1.912424               | 1.618397 | -0.071340 |
| 2             | 6             | 0           | -0.795085               | 2.502169 | -0.637639 |
| 3             | 6             | 0           | -1.647884               | 0.172416 | -0.502373 |
| 4             | 1             | 0           | -0.900069               | 3.518147 | -0.253159 |
| 5             | 1             | 0           | -0.901531               | 2.535551 | -1.728062 |
| 6             | 1             | 0           | -2.879479               | 1.947108 | -0.455645 |
| 7             | 1             | 0           | -1.691381               | 0.130118 | -1.600483 |

|    |   |   |           |           |           |
|----|---|---|-----------|-----------|-----------|
| 8  | 8 | 0 | -0.335777 | -0.191894 | -0.076225 |
| 9  | 7 | 0 | 0.553118  | 2.008418  | -0.329753 |
| 10 | 6 | 0 | -2.610244 | -0.887921 | 0.031874  |
| 11 | 1 | 0 | -2.222670 | -1.852462 | -0.310635 |
| 12 | 6 | 0 | -4.024219 | -0.715202 | -0.525609 |
| 13 | 1 | 0 | -3.974391 | -0.495496 | -1.600603 |
| 14 | 6 | 0 | -4.840021 | -1.977718 | -0.317625 |
| 15 | 1 | 0 | -4.775010 | -2.274938 | 0.733984  |
| 16 | 1 | 0 | -4.447774 | -2.783090 | -0.947634 |
| 17 | 8 | 0 | -2.645149 | -0.949308 | 1.444192  |
| 18 | 1 | 0 | -3.103244 | -0.143888 | 1.719887  |
| 19 | 8 | 0 | -4.639334 | 0.362058  | 0.166131  |
| 20 | 1 | 0 | -5.589434 | 0.213618  | 0.079921  |
| 21 | 8 | 0 | -6.180614 | -1.652255 | -0.672187 |
| 22 | 1 | 0 | -6.763762 | -2.317552 | -0.294646 |
| 23 | 8 | 0 | -1.979550 | 1.726920  | 1.348543  |
| 24 | 1 | 0 | -1.293407 | 1.145999  | 1.699203  |
| 25 | 6 | 0 | 1.021150  | 2.282044  | 1.030185  |
| 26 | 1 | 0 | 0.692109  | 1.547191  | 1.777244  |
| 27 | 1 | 0 | 2.113397  | 2.298070  | 1.049010  |
| 28 | 1 | 0 | 0.662761  | 3.264459  | 1.338353  |
| 29 | 6 | 0 | 2.016389  | 0.040475  | -0.424176 |
| 30 | 6 | 0 | 2.202175  | -1.001055 | 0.484546  |
| 31 | 6 | 0 | 3.130164  | 0.583073  | -1.056518 |
| 32 | 6 | 0 | 3.474192  | -1.482984 | 0.754626  |
| 33 | 1 | 0 | 1.343451  | -1.432697 | 0.983373  |
| 34 | 6 | 0 | 4.413508  | 0.110212  | -0.796965 |
| 35 | 1 | 0 | 2.999053  | 1.397811  | -1.761745 |
| 36 | 6 | 0 | 4.589137  | -0.930006 | 0.119232  |
| 37 | 1 | 0 | 3.627696  | -2.289481 | 1.462275  |
| 38 | 1 | 0 | 5.257057  | 0.556346  | -1.306738 |
| 39 | 6 | 0 | 0.651334  | 0.615895  | -0.716776 |
| 40 | 1 | 0 | 0.459494  | 0.576568  | -1.798912 |
| 41 | 8 | 0 | 5.790673  | -1.460422 | 0.451272  |
| 42 | 6 | 0 | 6.944128  | -0.915257 | -0.172388 |
| 43 | 1 | 0 | 7.052541  | 0.149838  | 0.052437  |
| 44 | 1 | 0 | 7.793081  | -1.457539 | 0.239189  |
| 45 | 1 | 0 | 6.913882  | -1.060614 | -1.256464 |

-----

### Structure 45d (<sup>5</sup>C<sub>2</sub> ec-ax) (M06-2X, Gas Phase)

Energy (Hartrees): = - 1091.3579982

No imaginary frequencies

Standard orientation:

| Center Number | Atomic Number | Atomic Type | Coordinates (Angstroms) |           |           |
|---------------|---------------|-------------|-------------------------|-----------|-----------|
|               |               |             | X                       | Y         | Z         |
| 1             | 6             | 0           | -1.690264               | 1.203752  | -0.966476 |
| 2             | 6             | 0           | -0.449381               | 1.954504  | -1.449497 |
| 3             | 6             | 0           | -1.291108               | 0.272313  | 0.185169  |
| 4             | 1             | 0           | -0.752028               | 2.704121  | -2.184523 |
| 5             | 1             | 0           | 0.250348                | 1.254891  | -1.929589 |
| 6             | 1             | 0           | -2.133928               | 0.637931  | -1.787885 |
| 7             | 1             | 0           | -0.552910               | -0.451645 | -0.190212 |
| 8             | 8             | 0           | -0.709515               | 1.056668  | 1.220081  |
| 9             | 7             | 0           | 0.101162                | 2.640709  | -0.290663 |
| 10            | 6             | 0           | -2.444793               | -0.504344 | 0.813314  |
| 11            | 1             | 0           | -2.026742               | -1.136663 | 1.603810  |
| 12            | 6             | 0           | -3.178852               | -1.409645 | -0.175607 |
| 13            | 1             | 0           | -3.639598               | -0.795855 | -0.964177 |
| 14            | 6             | 0           | -2.317513               | -2.484174 | -0.815490 |
| 15            | 1             | 0           | -1.768021               | -3.013129 | -0.022960 |
| 16            | 1             | 0           | -1.591716               | -2.044140 | -1.503905 |
| 17            | 8             | 0           | -3.402539               | 0.325710  | 1.445308  |
| 18            | 1             | 0           | -3.535302               | 1.085639  | 0.862434  |
| 19            | 8             | 0           | -4.195964               | -2.101964 | 0.528369  |
| 20            | 1             | 0           | -4.620411               | -1.447464 | 1.095354  |
| 21            | 8             | 0           | -3.111865               | -3.370998 | -1.567480 |
| 22            | 1             | 0           | -3.865874               | -3.585113 | -1.007161 |
| 23            | 8             | 0           | -2.664605               | 2.139810  | -0.525226 |
| 24            | 1             | 0           | -2.170880               | 2.753164  | 0.038362  |
| 25            | 6             | 0           | 0.945603                | 3.795009  | -0.526286 |
| 26            | 1             | 0           | 1.888907                | 3.585348  | -1.047267 |
| 27            | 1             | 0           | 0.388829                | 4.525131  | -1.118436 |
| 28            | 1             | 0           | 1.189080                | 4.257914  | 0.432730  |
| 29            | 6             | 0           | 1.592357                | 0.759303  | 0.570883  |
| 30            | 6             | 0           | 2.487359                | 0.834251  | -0.486058 |
| 31            | 6             | 0           | 1.764112                | -0.269979 | 1.506912  |
| 32            | 6             | 0           | 3.532250                | -0.081593 | -0.625437 |
| 33            | 1             | 0           | 2.383565                | 1.606658  | -1.236713 |
| 34            | 6             | 0           | 2.790464                | -1.184388 | 1.384886  |
| 35            | 1             | 0           | 1.066270                | -0.349228 | 2.333204  |
| 36            | 6             | 0           | 3.687079                | -1.096012 | 0.314008  |
| 37            | 1             | 0           | 4.204431                | 0.010242  | -1.467431 |

|    |   |   |          |           |           |
|----|---|---|----------|-----------|-----------|
| 38 | 1 | 0 | 2.927894 | -1.982710 | 2.103528  |
| 39 | 6 | 0 | 0.453122 | 1.753857  | 0.802780  |
| 40 | 1 | 0 | 0.714110 | 2.388856  | 1.654250  |
| 41 | 8 | 0 | 4.660531 | -2.037724 | 0.278364  |
| 42 | 6 | 0 | 5.588681 | -1.981580 | -0.784682 |
| 43 | 1 | 0 | 6.278842 | -2.806540 | -0.625652 |
| 44 | 1 | 0 | 5.091320 | -2.104636 | -1.752097 |
| 45 | 1 | 0 | 6.142650 | -1.037387 | -0.776860 |

-----  
**Structure 45d (<sup>5</sup>C<sub>2</sub> ax-ax) (M06-2X, Gas Phase)**

Energy (Hartrees): = - 1091.3603633  
 No imaginary frequencies

Standard orientation:

| Center<br>Number | Atomic<br>Number | Atomic<br>Type | Coordinates (Angstroms) |           |           |
|------------------|------------------|----------------|-------------------------|-----------|-----------|
|                  |                  |                | X                       | Y         | Z         |
| 1                | 6                | 0              | 1.479351                | 1.263950  | 0.984350  |
| 2                | 6                | 0              | 0.198488                | 2.007961  | 1.374907  |
| 3                | 6                | 0              | 1.121663                | 0.266847  | -0.121708 |
| 4                | 1                | 0              | 0.438139                | 2.795542  | 2.091145  |
| 5                | 1                | 0              | -0.484745               | 1.301605  | 1.860797  |
| 6                | 1                | 0              | 1.886384                | 0.731645  | 1.846117  |
| 7                | 1                | 0              | 0.381365                | -0.439832 | 0.279224  |
| 8                | 8                | 0              | 0.549351                | 0.996835  | -1.205626 |
| 9                | 7                | 0              | -0.492769               | 2.608996  | 0.231587  |
| 10               | 6                | 0              | 2.272328                | -0.555963 | -0.705870 |
| 11               | 1                | 0              | 1.859111                | -1.071902 | -1.579627 |
| 12               | 6                | 0              | 2.790307                | -1.602674 | 0.280983  |
| 13               | 1                | 0              | 1.947773                | -2.144388 | 0.733472  |
| 14               | 6                | 0              | 3.696694                | -2.601692 | -0.418298 |
| 15               | 1                | 0              | 4.451529                | -2.048147 | -0.985271 |
| 16               | 1                | 0              | 3.109025                | -3.226342 | -1.100718 |
| 17               | 8                | 0              | 3.341950                | 0.229070  | -1.182446 |
| 18               | 1                | 0              | 3.767641                | 0.596136  | -0.395826 |
| 19               | 8                | 0              | 3.526611                | -0.918911 | 1.277922  |
| 20               | 1                | 0              | 4.100780                | -1.578636 | 1.684159  |
| 21               | 8                | 0              | 4.290093                | -3.382760 | 0.611937  |
| 22               | 1                | 0              | 5.051084                | -3.844015 | 0.255738  |
| 23               | 8                | 0              | 2.478312                | 2.175298  | 0.546965  |
| 24               | 1                | 0              | 2.354394                | 2.282661  | -0.403834 |
| 25               | 6                | 0              | 0.047245                | 3.885666  | -0.227247 |
| 26               | 1                | 0              | 0.937630                | 3.794654  | -0.861408 |
| 27               | 1                | 0              | -0.722750               | 4.414474  | -0.794730 |
| 28               | 1                | 0              | 0.312682                | 4.494049  | 0.637263  |
| 29               | 6                | 0              | -1.771566               | 0.650059  | -0.556320 |
| 30               | 6                | 0              | -2.789181               | 0.915323  | 0.348226  |
| 31               | 6                | 0              | -1.809652               | -0.552117 | -1.270669 |
| 32               | 6                | 0              | -3.823918               | 0.003981  | 0.561159  |
| 33               | 1                | 0              | -2.769417               | 1.850846  | 0.895300  |
| 34               | 6                | 0              | -2.827094               | -1.465349 | -1.071259 |
| 35               | 1                | 0              | -1.022500               | -0.764037 | -1.986057 |
| 36               | 6                | 0              | -3.842468               | -1.193888 | -0.148553 |
| 37               | 1                | 0              | -4.598064               | 0.242347  | 1.277739  |
| 38               | 1                | 0              | -2.867161               | -2.400743 | -1.615492 |
| 39               | 6                | 0              | -0.669696               | 1.662057  | -0.841236 |
| 40               | 1                | 0              | -0.934680               | 2.223980  | -1.740381 |
| 41               | 8                | 0              | -4.793877               | -2.153229 | -0.016870 |
| 42               | 6                | 0              | -5.832710               | -1.919648 | 0.909853  |
| 43               | 1                | 0              | -6.473872               | -2.797245 | 0.872155  |
| 44               | 1                | 0              | -5.438947               | -1.800772 | 1.924533  |
| 45               | 1                | 0              | -6.414283               | -1.032365 | 0.639637  |

-----  
**Structure 716d (<sup>5</sup>C<sub>2</sub> ec-ax) (M06-2X, Benzene)**

Energy (Hartrees): = - 1091.3790078  
 No imaginary frequencies

Standard orientation:

| Center<br>Number | Atomic<br>Number | Atomic<br>Type | Coordinates (Angstroms) |           |           |
|------------------|------------------|----------------|-------------------------|-----------|-----------|
|                  |                  |                | X                       | Y         | Z         |
| 1                | 6                | 0              | -1.694078               | 1.205658  | -0.959517 |
| 2                | 6                | 0              | -0.449543               | 1.945757  | -1.446054 |
| 3                | 6                | 0              | -1.295235               | 0.262021  | 0.182068  |
| 4                | 1                | 0              | -0.744817               | 2.699966  | -2.179304 |
| 5                | 1                | 0              | 0.241256                | 1.240374  | -1.929658 |
| 6                | 1                | 0              | -2.151178               | 0.651474  | -1.780999 |
| 7                | 1                | 0              | -0.570754               | -0.468417 | -0.206056 |
| 8                | 8                | 0              | -0.695920               | 1.031143  | 1.219287  |
| 9                | 7                | 0              | 0.110666                | 2.623091  | -0.286717 |

|    |   |   |           |           |           |
|----|---|---|-----------|-----------|-----------|
| 10 | 6 | 0 | -2.453272 | -0.503259 | 0.817151  |
| 11 | 1 | 0 | -2.036906 | -1.152255 | 1.595011  |
| 12 | 6 | 0 | -3.220039 | -1.382781 | -0.170597 |
| 13 | 1 | 0 | -3.677970 | -0.752847 | -0.947313 |
| 14 | 6 | 0 | -2.389824 | -2.468630 | -0.830034 |
| 15 | 1 | 0 | -1.843442 | -3.021420 | -0.052126 |
| 16 | 1 | 0 | -1.662139 | -2.036920 | -1.521303 |
| 17 | 8 | 0 | -3.387798 | 0.341214  | 1.469966  |
| 18 | 1 | 0 | -3.495601 | 1.116163  | 0.900866  |
| 19 | 8 | 0 | -4.245338 | -2.060016 | 0.540592  |
| 20 | 1 | 0 | -4.657747 | -1.396497 | 1.106500  |
| 21 | 8 | 0 | -3.213156 | -3.332225 | -1.583856 |
| 22 | 1 | 0 | -3.962394 | -3.540173 | -1.014480 |
| 23 | 8 | 0 | -2.653727 | 2.152389  | -0.499514 |
| 24 | 1 | 0 | -2.137615 | 2.773090  | 0.036833  |
| 25 | 6 | 0 | 0.958426  | 3.774646  | -0.526277 |
| 26 | 1 | 0 | 1.873610  | 3.568129  | -1.096341 |
| 27 | 1 | 0 | 0.387294  | 4.530076  | -1.072227 |
| 28 | 1 | 0 | 1.252017  | 4.207128  | 0.433046  |
| 29 | 6 | 0 | 1.606355  | 0.734947  | 0.560434  |
| 30 | 6 | 0 | 2.498421  | 0.812152  | -0.499755 |
| 31 | 6 | 0 | 1.786173  | -0.292529 | 1.497237  |
| 32 | 6 | 0 | 3.549795  | -0.096812 | -0.638475 |
| 33 | 1 | 0 | 2.389707  | 1.582193  | -1.252423 |
| 34 | 6 | 0 | 2.818633  | -1.200959 | 1.375411  |
| 35 | 1 | 0 | 1.093248  | -0.375220 | 2.327400  |
| 36 | 6 | 0 | 3.714591  | -1.107799 | 0.303912  |
| 37 | 1 | 0 | 4.221421  | -0.001704 | -1.480931 |
| 38 | 1 | 0 | 2.960446  | -1.995181 | 2.098443  |
| 39 | 6 | 0 | 0.467395  | 1.729853  | 0.798830  |
| 40 | 1 | 0 | 0.733581  | 2.359769  | 1.652220  |
| 41 | 8 | 0 | 4.696114  | -2.039269 | 0.269987  |
| 42 | 6 | 0 | 5.650271  | -1.953503 | -0.771900 |
| 43 | 1 | 0 | 6.353206  | -2.766651 | -0.602994 |
| 44 | 1 | 0 | 5.182718  | -2.080801 | -1.753339 |
| 45 | 1 | 0 | 6.187579  | -1.000371 | -0.740101 |

-----

### Structure 45d (<sup>5</sup>C<sub>2</sub> ax-ax) (M06-2X, Benece)

Energy (Hartrees): = - 1091.3806826  
 No imaginary frequencies

Standard orientation:

| Center<br>Number | Atomic<br>Number | Atomic<br>Type | Coordinates (Angstroms) |           |           |
|------------------|------------------|----------------|-------------------------|-----------|-----------|
|                  |                  |                | X                       | Y         | Z         |
| 1                | 6                | 0              | 1.483069                | 1.256794  | 0.983338  |
| 2                | 6                | 0              | 0.208023                | 2.007353  | 1.378708  |
| 3                | 6                | 0              | 1.117642                | 0.262051  | -0.121886 |
| 4                | 1                | 0              | 0.452479                | 2.795219  | 2.093073  |
| 5                | 1                | 0              | -0.471845               | 1.302522  | 1.870998  |
| 6                | 1                | 0              | 1.887397                | 0.723085  | 1.845514  |
| 7                | 1                | 0              | 0.375637                | -0.440985 | 0.280918  |
| 8                | 8                | 0              | 0.546508                | 0.996820  | -1.204388 |
| 9                | 7                | 0              | -0.487634               | 2.609679  | 0.238339  |
| 10               | 6                | 0              | 2.261601                | -0.569118 | -0.706707 |
| 11               | 1                | 0              | 1.838908                | -1.108204 | -1.561492 |
| 12               | 6                | 0              | 2.800688                | -1.592087 | 0.294639  |
| 13               | 1                | 0              | 1.967093                | -2.105727 | 0.793095  |
| 14               | 6                | 0              | 3.668104                | -2.625236 | -0.403203 |
| 15               | 1                | 0              | 4.412029                | -2.104997 | -1.014807 |
| 16               | 1                | 0              | 3.049191                | -3.262662 | -1.044616 |
| 17               | 8                | 0              | 3.321148                | 0.212274  | -1.215174 |
| 18               | 1                | 0              | 3.773371                | 0.567534  | -0.437998 |
| 19               | 8                | 0              | 3.582412                | -0.887691 | 1.244530  |
| 20               | 1                | 0              | 4.171778                | -1.542344 | 1.638658  |
| 21               | 8                | 0              | 4.289217                | -3.383693 | 0.628331  |
| 22               | 1                | 0              | 5.040512                | -3.852927 | 0.258189  |
| 23               | 8                | 0              | 2.489384                | 2.161372  | 0.543639  |
| 24               | 1                | 0              | 2.353076                | 2.280934  | -0.404166 |
| 25               | 6                | 0              | 0.047869                | 3.889316  | -0.216774 |
| 26               | 1                | 0              | 0.945734                | 3.807984  | -0.842220 |
| 27               | 1                | 0              | -0.719522               | 4.412698  | -0.793136 |
| 28               | 1                | 0              | 0.297711                | 4.502737  | 0.649521  |
| 29               | 6                | 0              | -1.778062               | 0.658878  | -0.558806 |
| 30               | 6                | 0              | -2.779885               | 0.906733  | 0.369122  |
| 31               | 6                | 0              | -1.835084               | -0.527430 | -1.298738 |
| 32               | 6                | 0              | -3.814546               | -0.005436 | 0.580696  |
| 33               | 1                | 0              | -2.750967               | 1.829591  | 0.937166  |
| 34               | 6                | 0              | -2.853643               | -1.440980 | -1.102795 |
| 35               | 1                | 0              | -1.062615               | -0.729805 | -2.032647 |
| 36               | 6                | 0              | -3.851525               | -1.187737 | -0.155140 |
| 37               | 1                | 0              | -4.575068               | 0.218941  | 1.316567  |
| 38               | 1                | 0              | -2.903501               | -2.363193 | -1.669154 |
| 39               | 6                | 0              | -0.670235               | 1.667542  | -0.837955 |

|    |   |   |           |           |           |
|----|---|---|-----------|-----------|-----------|
| 40 | 1 | 0 | -0.931761 | 2.234812  | -1.734676 |
| 41 | 8 | 0 | -4.804367 | -2.143137 | -0.026665 |
| 42 | 6 | 0 | -5.815744 | -1.932140 | 0.939646  |
| 43 | 1 | 0 | -6.458242 | -2.809639 | 0.901845  |
| 44 | 1 | 0 | -5.392618 | -1.840096 | 1.945218  |
| 45 | 1 | 0 | -6.409394 | -1.041812 | 0.708710  |

### Structure 45d ( $^5C_2$ ec-ax) (M06-2X, DMSO)

Energy (Hartrees): = - 1091.3850941  
No imaginary frequencies

Standard orientation:

| Center<br>Number | Atomic<br>Number | Atomic<br>Type | Coordinates (Angstroms) |           |           |
|------------------|------------------|----------------|-------------------------|-----------|-----------|
|                  |                  |                | X                       | Y         | Z         |
| 1                | 6                | 0              | -1.689616               | 1.208535  | -0.963505 |
| 2                | 6                | 0              | -0.442164               | 1.947485  | -1.439922 |
| 3                | 6                | 0              | -1.300591               | 0.264190  | 0.180071  |
| 4                | 1                | 0              | -0.727572               | 2.702514  | -2.176025 |
| 5                | 1                | 0              | 0.251958                | 1.241503  | -1.916159 |
| 6                | 1                | 0              | -2.141008               | 0.653149  | -1.786571 |
| 7                | 1                | 0              | -0.580546               | -0.469640 | -0.207895 |
| 8                | 8                | 0              | -0.701165               | 1.027309  | 1.224377  |
| 9                | 7                | 0              | 0.108290                | 2.624998  | -0.274417 |
| 10               | 6                | 0              | -2.464490               | -0.495859 | 0.808260  |
| 11               | 1                | 0              | -2.057564               | -1.139903 | 1.595091  |
| 12               | 6                | 0              | -3.219757               | -1.382941 | -0.180597 |
| 13               | 1                | 0              | -3.661167               | -0.761759 | -0.972698 |
| 14               | 6                | 0              | -2.379561               | -2.476946 | -0.810242 |
| 15               | 1                | 0              | -1.841562               | -3.016103 | -0.017812 |
| 16               | 1                | 0              | -1.647650               | -2.051544 | -1.499643 |
| 17               | 8                | 0              | -3.408154               | 0.358705  | 1.441755  |
| 18               | 1                | 0              | -3.486502               | 1.135541  | 0.868581  |
| 19               | 8                | 0              | -4.261792               | -2.047759 | 0.523867  |
| 20               | 1                | 0              | -4.689177               | -1.369272 | 1.060745  |
| 21               | 8                | 0              | -3.195338               | -3.359794 | -1.559460 |
| 22               | 1                | 0              | -3.950417               | -3.556398 | -0.993229 |
| 23               | 8                | 0              | -2.651788               | 2.160873  | -0.507084 |
| 24               | 1                | 0              | -2.128850               | 2.791912  | 0.011690  |
| 25               | 6                | 0              | 0.970222                | 3.768330  | -0.516109 |
| 26               | 1                | 0              | 1.865141                | 3.553154  | -1.113130 |
| 27               | 1                | 0              | 0.398715                | 4.539960  | -1.038465 |
| 28               | 1                | 0              | 1.293690                | 4.178471  | 0.443445  |
| 29               | 6                | 0              | 1.601456                | 0.728869  | 0.562889  |
| 30               | 6                | 0              | 2.500055                | 0.813542  | -0.492907 |
| 31               | 6                | 0              | 1.776896                | -0.306336 | 1.491721  |
| 32               | 6                | 0              | 3.553128                | -0.094103 | -0.632805 |
| 33               | 1                | 0              | 2.396413                | 1.586227  | -1.243435 |
| 34               | 6                | 0              | 2.810337                | -1.215747 | 1.367858  |
| 35               | 1                | 0              | 1.083215                | -0.398062 | 2.320433  |
| 36               | 6                | 0              | 3.713098                | -1.114212 | 0.301963  |
| 37               | 1                | 0              | 4.228035                | 0.008808  | -1.472082 |
| 38               | 1                | 0              | 2.944178                | -2.014813 | 2.087854  |
| 39               | 6                | 0              | 0.465013                | 1.726984  | 0.805674  |
| 40               | 1                | 0              | 0.736855                | 2.351994  | 1.660579  |
| 41               | 8                | 0              | 4.695518                | -2.044522 | 0.262988  |
| 42               | 6                | 0              | 5.666155                | -1.929666 | -0.767663 |
| 43               | 1                | 0              | 6.376052                | -2.737560 | -0.602657 |
| 44               | 1                | 0              | 5.211526                | -2.044174 | -1.756011 |
| 45               | 1                | 0              | 6.188874                | -0.970249 | -0.711347 |

### Structure 45d ( $^5C_2$ ax-ax) (M06-2X, DMSO)

Energy (Hartrees): = - 1091.3856841  
No imaginary frequencies

Standard orientation:

| Center<br>Number | Atomic<br>Number | Atomic<br>Type | Coordinates (Angstroms) |           |           |
|------------------|------------------|----------------|-------------------------|-----------|-----------|
|                  |                  |                | X                       | Y         | Z         |
| 1                | 6                | 0              | 1.476675                | 1.238976  | 0.987980  |
| 2                | 6                | 0              | 0.204088                | 1.995310  | 1.380472  |
| 3                | 6                | 0              | 1.113104                | 0.252674  | -0.122886 |
| 4                | 1                | 0              | 0.446692                | 2.780377  | 2.098800  |
| 5                | 1                | 0              | -0.478860               | 1.289473  | 1.866665  |
| 6                | 1                | 0              | 1.864969                | 0.695241  | 1.852120  |
| 7                | 1                | 0              | 0.374729                | -0.453858 | 0.278653  |
| 8                | 8                | 0              | 0.542014                | 0.989969  | -1.205188 |
| 9                | 7                | 0              | -0.486778               | 2.604038  | 0.238577  |
| 10               | 6                | 0              | 2.254864                | -0.578900 | -0.705284 |
| 11               | 1                | 0              | 1.821937                | -1.160995 | -1.525541 |

|    |   |   |           |           |           |
|----|---|---|-----------|-----------|-----------|
| 12 | 6 | 0 | 2.837338  | -1.552491 | 0.321828  |
| 13 | 1 | 0 | 2.027471  | -1.998589 | 0.913811  |
| 14 | 6 | 0 | 3.614090  | -2.658348 | -0.368916 |
| 15 | 1 | 0 | 4.321454  | -2.210806 | -1.074891 |
| 16 | 1 | 0 | 2.924668  | -3.312211 | -0.913531 |
| 17 | 8 | 0 | 3.289900  | 0.204178  | -1.267945 |
| 18 | 1 | 0 | 3.800219  | 0.521960  | -0.510536 |
| 19 | 8 | 0 | 3.712340  | -0.817211 | 1.166083  |
| 20 | 1 | 0 | 4.330646  | -1.466075 | 1.526005  |
| 21 | 8 | 0 | 4.299570  | -3.369101 | 0.656553  |
| 22 | 1 | 0 | 4.996590  | -3.892647 | 0.250024  |
| 23 | 8 | 0 | 2.497533  | 2.137867  | 0.565631  |
| 24 | 1 | 0 | 2.373037  | 2.263511  | -0.383104 |
| 25 | 6 | 0 | 0.073056  | 3.872951  | -0.222322 |
| 26 | 1 | 0 | 0.981886  | 3.772756  | -0.828922 |
| 27 | 1 | 0 | -0.675727 | 4.395249  | -0.823461 |
| 28 | 1 | 0 | 0.310255  | 4.494836  | 0.641963  |
| 29 | 6 | 0 | -1.782845 | 0.654465  | -0.555336 |
| 30 | 6 | 0 | -2.799872 | 0.918450  | 0.352991  |
| 31 | 6 | 0 | -1.829891 | -0.545709 | -1.273681 |
| 32 | 6 | 0 | -3.841276 | 0.013199  | 0.564287  |
| 33 | 1 | 0 | -2.780348 | 1.846864  | 0.912394  |
| 34 | 6 | 0 | -2.854639 | -1.454142 | -1.077854 |
| 35 | 1 | 0 | -1.044949 | -0.770508 | -1.987690 |
| 36 | 6 | 0 | -3.869554 | -1.182370 | -0.152401 |
| 37 | 1 | 0 | -4.611980 | 0.251771  | 1.285410  |
| 38 | 1 | 0 | -2.890823 | -2.386751 | -1.628899 |
| 39 | 6 | 0 | -0.673021 | 1.660947  | -0.837429 |
| 40 | 1 | 0 | -0.938536 | 2.229407  | -1.732259 |
| 41 | 8 | 0 | -4.826044 | -2.132059 | -0.021442 |
| 42 | 6 | 0 | -5.843504 | -1.905957 | 0.942678  |
| 43 | 1 | 0 | -6.486527 | -2.783311 | 0.914765  |
| 44 | 1 | 0 | -5.420416 | -1.799788 | 1.946132  |
| 45 | 1 | 0 | -6.433117 | -1.017629 | 0.697753  |

---
